# Supplementary material for: Integrated transcriptomic, proteomic and metabolomic analyses revealing the roles of amino acid and sucrose metabolism in augmenting drought tolerance in Agropyron mongolicum
Source: Front Plant Sci. 2024 Dec 16;15:1515944. doi: 10.3389/fpls.2024.1515944 (PMC11685866; doi:10.3389/fpls.2024.1515944)
Supplement: Supplementary file 2 [file Table1.xlsx]

## Sheet: Sheet1
				Author	Mandatory contribution	individual contributions
				Xiaoran Ma	Writing – original draft	Data curation,Investigation
				Qinwei Liang	Writing – review & editing	Investigation;Resources
				Yusi Han	Writing – review & editing	Investigation
				Lu Fan	Writing – review & editing	Data curation
				DengXia Yi	Writing – review & editing	Supervision,Validation
				Lin Ma	Writing – review & editing	Supervision,Validation
				Jun Tang	Writing – review & editing	Methodology,Investigation
				Xuemin Wang	Writing – review & editing	Methodology,Funding acquisition
