# Supplementary material for: Integrated transcriptomic, proteomic and metabolomic analyses revealing the roles of amino acid and sucrose metabolism in augmenting drought tolerance in Agropyron mongolicum
Source: Front Plant Sci. 2024 Dec 16;15:1515944. doi: 10.3389/fpls.2024.1515944 (PMC11685866; doi:10.3389/fpls.2024.1515944)
Supplement: Supplementary file 4 [file Table3.xlsx]

## Sheet: Sheet1
ID	root-CK-1_fpkm	root-CK-2_fpkm	root-CK-3_fpkm	root-D-24h-1_fpkm	root-D-24h-2_fpkm	root-D-24h-3_fpkm	root-CK-1_count	root-CK-2_count	root-CK-3_count	root-D-24h-1_count	root-D-24h-2_count	root-D-24h-3_count	log2FoldChange	pvalue	padj	regulated	Length	KEGG	KEGG pathway	NR	Swissprot	TrEMBL	KOG	GO	Pfam	TF-Family	TF-Category	TF-Classification
Cluster-100374.0	206.4	203.35	208.53	99.87	103.62	102.05	10686	9107	10497	4351	4832	4451	-1.06477	0	0	down	2538	K17302 coatomer subunit beta' | (RefSeq) uncharacterized protein LOC123140106 (A)	--	hypothetical protein EJB05_34106, partial [Eragrostis curvula]	WAV3_ARATH RecName: Full=E3 ubiquitin-protein ligase WAV3 {ECO:0000305}; EC=2.3.2.27 {ECO:0000269|PubMed:22122664}; AltName: Full=Protein WAVY GROWTH 3 {ECO:0000303|PubMed:22122664}; AltName: Full=RING-type E3 ubiquitin transferase WAV3 {ECO:0000305};	A0A5J9U2S9_9POAL RecName: Full=VWFA domain-containing protein {ECO:0000259|PROSITE:PS50234}; Flags: Fragment;	--	GO:0046872,metal ion binding; GO:0061630,ubiquitin protein ligase activity; GO:0009630,gravitropism; GO:0010274,hydrotropism; GO:0016567,protein ubiquitination; GO:0048364,root development; GO:0003674,molecular_function; GO:0005488,binding; GO:0043167,ion binding; GO:0043169,cation binding; GO:0003824,catalytic activity; GO:0004842,ubiquitin-protein transferase activity; GO:0016740,transferase ac…	von Willebrand factor type A domain	--	--	--
Cluster-101809.1	187.52	181.86	193.12	529.05	532.65	552.79	5139	4312	5143	12194	13159	12736	1.47191	0	0	up	1403	K03809 NAD(P)H dehydrogenase (quinone) [EC:1.6.5.2] | (RefSeq) quinone-oxidoreductase QR2-like (A)	ko00130: Ubiquinone and other terpenoid-quinone biosynthesis; ko01100: Metabolic pathways; ko01110: Biosynthesis of secondary metabolites; ko01240: Biosynthesis of cofactors	quinone-oxidoreductase QR2-like [Triticum dicoccoides]	QR2_TRIVS RecName: Full=Quinone-oxidoreductase QR2 {ECO:0000303|PubMed:11260494}; Short=TvQR2 {ECO:0000303|PubMed:11260494}; EC=1.6.5.2 {ECO:0000269|Ref.2};	A0A453ASJ4_AEGTS RecName: Full=NAD(P)H dehydrogenase (quinone) {ECO:0000256|ARBA:ARBA00012648}; EC=1.6.5.2 {ECO:0000256|ARBA:ARBA00012648};	1,4-benzoquinone reductase-like; Trp repressor binding protein-like/protoplast-secreted protein	GO:0010181,FMN binding; GO:0050136,NADH dehydrogenase (quinone) activity; GO:0008753,NADPH dehydrogenase (quinone) activity; GO:0000166,nucleotide binding; GO:0003674,molecular_function; GO:0005488,binding; GO:0032553,ribonucleotide binding; GO:0036094,small molecule binding; GO:0043167,ion binding; GO:0043168,anion binding; GO:0097159,organic cyclic compound binding; GO:0097367,carbohydrate deri…	NADPH-dependent FMN reductase	--	--	--
Cluster-101809.12	91.24	88.1	91.73	484.56	494.33	485.68	1761	1471	1720	7855	8603	7862	2.38284	0	0	up	1079	K03809 NAD(P)H dehydrogenase (quinone) [EC:1.6.5.2] | (RefSeq) NAD(P)H dehydrogenase (quinone) FQR1-like (A)	ko00130: Ubiquinone and other terpenoid-quinone biosynthesis; ko01100: Metabolic pathways; ko01110: Biosynthesis of secondary metabolites; ko01240: Biosynthesis of cofactors	quinone-oxidoreductase QR2 [Aegilops tauschii subsp. strangulata]	QR2_TRIVS RecName: Full=Quinone-oxidoreductase QR2 {ECO:0000303|PubMed:11260494}; Short=TvQR2 {ECO:0000303|PubMed:11260494}; EC=1.6.5.2 {ECO:0000269|Ref.2};	A0A453ID78_AEGTS RecName: Full=NAD(P)H dehydrogenase (quinone) {ECO:0000256|ARBA:ARBA00012648}; EC=1.6.5.2 {ECO:0000256|ARBA:ARBA00012648};	1,4-benzoquinone reductase-like; Trp repressor binding protein-like/protoplast-secreted protein	GO:0010181,FMN binding; GO:0050136,NADH dehydrogenase (quinone) activity; GO:0008753,NADPH dehydrogenase (quinone) activity; GO:0000166,nucleotide binding; GO:0003674,molecular_function; GO:0005488,binding; GO:0032553,ribonucleotide binding; GO:0036094,small molecule binding; GO:0043167,ion binding; GO:0043168,anion binding; GO:0097159,organic cyclic compound binding; GO:0097367,carbohydrate deri…	NADPH-dependent FMN reductase	--	--	--
Cluster-101809.3	46.83	43.42	42.18	1015.85	1000.99	1069.13	220	177	192	3966	4255	4116	4.4757	0	0	up	494	K03809 NAD(P)H dehydrogenase (quinone) [EC:1.6.5.2] | (RefSeq) probable NAD(P)H dehydrogenase (quinone) FQR1-like 1 (A)	ko00130: Ubiquinone and other terpenoid-quinone biosynthesis; ko01100: Metabolic pathways; ko01110: Biosynthesis of secondary metabolites; ko01240: Biosynthesis of cofactors	quinone-oxidoreductase QR2 [Aegilops tauschii subsp. strangulata]	QR2_TRIVS RecName: Full=Quinone-oxidoreductase QR2 {ECO:0000303|PubMed:11260494}; Short=TvQR2 {ECO:0000303|PubMed:11260494}; EC=1.6.5.2 {ECO:0000269|Ref.2};	A0A453ASJ4_AEGTS RecName: Full=NAD(P)H dehydrogenase (quinone) {ECO:0000256|ARBA:ARBA00012648}; EC=1.6.5.2 {ECO:0000256|ARBA:ARBA00012648};	1,4-benzoquinone reductase-like; Trp repressor binding protein-like/protoplast-secreted protein	GO:0010181,FMN binding; GO:0050136,NADH dehydrogenase (quinone) activity; GO:0008753,NADPH dehydrogenase (quinone) activity; GO:0000166,nucleotide binding; GO:0003674,molecular_function; GO:0005488,binding; GO:0032553,ribonucleotide binding; GO:0036094,small molecule binding; GO:0043167,ion binding; GO:0043168,anion binding; GO:0097159,organic cyclic compound binding; GO:0097367,carbohydrate deri…	NADPH-dependent FMN reductase	--	--	--
Cluster-102004.13	63.79	68.7	66.84	253.33	265	263.08	1356	1261	1378	4525	5073	4692	1.92384	0	0	up	1279	K22395 cinnamyl-alcohol dehydrogenase [EC:1.1.1.195] | (RefSeq) berberine bridge enzyme-like 26 (A)	ko00940: Phenylpropanoid biosynthesis; ko01100: Metabolic pathways; ko01110: Biosynthesis of secondary metabolites	berberine bridge enzyme-like 18 [Triticum dicoccoides]	CYND4_CYNDA RecName: Full=Berberine bridge enzyme-like Cyn d 4 {ECO:0000305}; AltName: Full=60 kDa pollen antigen {ECO:0000303|PubMed:8828524, ECO:0000303|PubMed:8900140}; Short=BG60 {ECO:0000303|PubMed:20080962, ECO:0000303|PubMed:8828524, ECO:0000303|PubMed:8900140}; AltName: Full=Cyn d BG60 {ECO:0000303|PubMed:20080962}; AltName: Full=FAD-linked oxidoreductase BG60 {ECO:0000312|EMBL:AAS02108.1…	A0A446T693_TRITD RecName: Full=FAD-binding PCMH-type domain-containing protein {ECO:0000259|PROSITE:PS51387};	--	GO:0071949,FAD binding; GO:0016491,oxidoreductase activity; GO:0000166,nucleotide binding; GO:0003674,molecular_function; GO:0005488,binding; GO:0036094,small molecule binding; GO:0043167,ion binding; GO:0043168,anion binding; GO:0050660,flavin adenine dinucleotide binding; GO:0097159,organic cyclic compound binding; GO:1901265,nucleoside phosphate binding; GO:1901363,heterocyclic compound bindin…	Berberine and berberine like	--	--	--
Cluster-104008.15	495.6	466.17	500.8	130.12	129.71	135.24	6901	5621	6771	1519	1629	1574	-1.94173	0	0	down	864	K05953 nicotianamine synthase [EC:2.5.1.43] | (RefSeq) probable nicotianamine synthase 4 (A)	ko00270: Cysteine and methionine metabolism; ko00999: Biosynthesis of various plant secondary metabolites; ko01100: Metabolic pathways; ko01110: Biosynthesis of secondary metabolites	probable nicotianamine synthase 2 [Hordeum vulgare subsp. vulgare]	NAS2_HORVU RecName: Full=Probable nicotianamine synthase 2; EC=2.5.1.43; AltName: Full=HvNAS2; AltName: Full=S-adenosyl-L-methionine:S-adenosyl-L-methionine:S-adenosyl-methionine 3-amino-3-carboxypropyltransferase 2;	F2DH77_HORVV RecName: Full=Nicotianamine synthase {ECO:0000256|RuleBase:RU368095}; EC=2.5.1.43 {ECO:0000256|RuleBase:RU368095};	--	GO:0030410,nicotianamine synthase activity; GO:0030418,nicotianamine biosynthetic process; GO:0003674,molecular_function; GO:0003824,catalytic activity; GO:0016740,transferase activity; GO:0016765,transferase activity, transferring alkyl or aryl (other than methyl) groups; GO:0006082,organic acid metabolic process; GO:0006576,cellular biogenic amine metabolic process; GO:0006807,nitrogen compound…	Nicotianamine synthase protein	--	--	--
Cluster-104008.27	486.25	476.05	400.29	181.04	181.14	188.89	9996	8940	10043	3755	3936	3656	-1.26664	0	0	down	2416	K05953 nicotianamine synthase [EC:2.5.1.43] | (RefSeq) probable nicotianamine synthase 4 (A)	ko00270: Cysteine and methionine metabolism; ko00999: Biosynthesis of various plant secondary metabolites; ko01100: Metabolic pathways; ko01110: Biosynthesis of secondary metabolites	putative nicotianamine synthase 7 [Hordeum vulgare]	NAS4_HORVU RecName: Full=Probable nicotianamine synthase 4; EC=2.5.1.43; AltName: Full=HvNAS4; AltName: Full=S-adenosyl-L-methionine:S-adenosyl-L-methionine:S-adenosyl-methionine 3-amino-3-carboxypropyltransferase 4;	A0A446V5C7_TRITD RecName: Full=Nicotianamine synthase {ECO:0000256|RuleBase:RU368095}; EC=2.5.1.43 {ECO:0000256|RuleBase:RU368095};	--	GO:0030410,nicotianamine synthase activity; GO:0030418,nicotianamine biosynthetic process; GO:0003674,molecular_function; GO:0003824,catalytic activity; GO:0016740,transferase activity; GO:0016765,transferase activity, transferring alkyl or aryl (other than methyl) groups; GO:0006082,organic acid metabolic process; GO:0006576,cellular biogenic amine metabolic process; GO:0006807,nitrogen compound…	Nicotianamine synthase protein	--	--	--
Cluster-106936.7	337.48	312.23	362.5	2.8	3.11	5.03	5328	4583	5320	42	51	74	-6.42378	0	0	down	1132	K00469 inositol oxygenase [EC:1.13.99.1] | (RefSeq) inositol oxygenase 4-like (A)	ko00053: Ascorbate and aldarate metabolism; ko00562: Inositol phosphate metabolism; ko01100: Metabolic pathways; ko01250: Biosynthesis of nucleotide sugars	hypothetical protein FH972_023093 [Carpinus fangiana]	MIOX_ORYSJ RecName: Full=Probable inositol oxygenase; EC=1.13.99.1; AltName: Full=Myo-inositol oxygenase; Short=MI oxygenase;	A0A5N6KUJ0_9ROSI RecName: Full=Inositol oxygenase {ECO:0000256|ARBA:ARBA00011919, ECO:0000256|RuleBase:RU367039}; EC=1.13.99.1 {ECO:0000256|ARBA:ARBA00011919, ECO:0000256|RuleBase:RU367039}; AltName: Full=Myo-inositol oxygenase {ECO:0000256|RuleBase:RU367039};	Aldehyde reductase	GO:0005737,cytoplasm; GO:0050113,inositol oxygenase activity; GO:0005506,iron ion binding; GO:0019310,inositol catabolic process; GO:0019853,L-ascorbic acid biosynthetic process; GO:0003674,molecular_function; GO:0003824,catalytic activity; GO:0004497,monooxygenase activity; GO:0016491,oxidoreductase activity; GO:0016701,oxidoreductase activity, acting on single donors with incorporation of molec…	Myo-inositol oxygenase	--	--	--
Cluster-108183.1	77.83	80.02	76.74	318.84	324.15	319.5	2382	2119	2282	8210	8943	8226	1.98955	0	0	up	1531	K13065 shikimate O-hydroxycinnamoyltransferase [EC:2.3.1.133] | (RefSeq) agmatine coumaroyltransferase-2-like (A)	ko00940: Phenylpropanoid biosynthesis; ko00941: Flavonoid biosynthesis; ko00945: Stilbenoid, diarylheptanoid and gingerol biosynthesis; ko01100: Metabolic pathways; ko01110: Biosynthesis of secondary metabolites	tryptamine benzoyltransferase 1-like [Triticum dicoccoides]	TBT1_ORYSJ RecName: Full=Tryptamine benzoyltransferase 1 {ECO:0000305}; Short=OsTBT1 {ECO:0000303|PubMed:27354554}; EC=2.3.1.- {ECO:0000305};	A0A446QJT5_TRITD SubName: Full=Uncharacterized protein {ECO:0000313|EMBL:VAH86892.1};	--	GO:0016747,acyltransferase activity, transferring groups other than amino-acyl groups; GO:0050734,hydroxycinnamoyltransferase activity; GO:0003674,molecular_function; GO:0003824,catalytic activity; GO:0016740,transferase activity; GO:0016746,acyltransferase activity	Transferase family	--	--	--
Cluster-108993.0	306.85	316.92	323.76	93.78	97.56	92.86	3110	2801	3165	780	886	775	-1.80929	0	0	down	766	K05953 nicotianamine synthase [EC:2.5.1.43] | (RefSeq) nicotianamine synthase 1 (A)	ko00270: Cysteine and methionine metabolism; ko00999: Biosynthesis of various plant secondary metabolites; ko01100: Metabolic pathways; ko01110: Biosynthesis of secondary metabolites	nicotianamine synthase 1 [Aegilops tauschii subsp. strangulata]	NAS1_HORVU RecName: Full=Nicotianamine synthase 1; EC=2.5.1.43; AltName: Full=HvNAS1; AltName: Full=S-adenosyl-L-methionine:S-adenosyl-L-methionine:S-adenosyl-methionine 3-amino-3-carboxypropyltransferase 1;	A0A3B6QFN5_WHEAT RecName: Full=Nicotianamine synthase {ECO:0000256|RuleBase:RU368095}; EC=2.5.1.43 {ECO:0000256|RuleBase:RU368095};	--	GO:0030410,nicotianamine synthase activity; GO:0030418,nicotianamine biosynthetic process; GO:0003674,molecular_function; GO:0003824,catalytic activity; GO:0016740,transferase activity; GO:0016765,transferase activity, transferring alkyl or aryl (other than methyl) groups; GO:0006082,organic acid metabolic process; GO:0006576,cellular biogenic amine metabolic process; GO:0006807,nitrogen compound…	Nicotianamine synthase protein	--	--	--
Cluster-110184.5	241.14	241.61	233.93	571.18	568.59	583.28	5318	4611	5012	10585	11305	10799	1.21612	0	0	up	1189	--	--	membrane protein PM19L-like [Triticum dicoccoides]	PM19L_ORYSJ RecName: Full=Membrane protein PM19L {ECO:0000305}; AltName: Full=PM19-like protein 1 {ECO:0000303|PubMed:26505346}; Short=OsPM19L1 {ECO:0000303|PubMed:26505346};	A0A3B6I1C4_WHEAT SubName: Full=PM19-A2 {ECO:0000313|EMBL:AKC34100.1};	--	GO:0016021,integral component of membrane; GO:0005575,cellular_component; GO:0016020,membrane; GO:0031224,intrinsic component of membrane; GO:0110165,cellular anatomical entity	AWPM-19-like family	--	--	--
Cluster-110829.2	2.44	4.02	4.18	313.5	303.99	279.15	31	44	51	3329	3471	2954	6.35953	0	0	up	820	--	--	putative nitroreductase HBN1 [Quercus suber]	--	A0A5N6KTQ4_9ROSI RecName: Full=Nitroreductase domain-containing protein {ECO:0000259|Pfam:PF00881};	--	GO:0016657,oxidoreductase activity, acting on NAD(P)H, nitrogenous group as acceptor; GO:0034599,cellular response to oxidative stress; GO:0003674,molecular_function; GO:0003824,catalytic activity; GO:0016491,oxidoreductase activity; GO:0016651,oxidoreductase activity, acting on NAD(P)H; GO:0006950,response to stress; GO:0006979,response to oxidative stress; GO:0008150,biological_process; GO:0009…	Nitroreductase family	--	--	--
Cluster-111092.6	17.65	19.56	18.97	303.15	288.28	272.94	167	160	174	2401	2464	2150	3.89325	0	0	up	686	--	--	--	--	--	--	--	--	--	--	--
Cluster-111225.3	427.69	422.87	420.97	205.03	216.35	216.63	8547	7322	8172	3435	3894	3651	-1.0442	0	0	down	1646	K00430 peroxidase [EC:1.11.1.7] | (RefSeq) peroxidase N-like (A)	ko00940: Phenylpropanoid biosynthesis; ko01100: Metabolic pathways; ko01110: Biosynthesis of secondary metabolites	unnamed protein product [Triticum turgidum subsp. durum]	PERN_ARMRU RecName: Full=Peroxidase N; EC=1.11.1.7; AltName: Full=Neutral peroxidase; Flags: Precursor;	A0A452XZZ4_AEGTS RecName: Full=PEROXIDASE_4 domain-containing protein {ECO:0000259|PROSITE:PS50873};	--	GO:0005576,extracellular region; GO:0020037,heme binding; GO:0046872,metal ion binding; GO:0004601,peroxidase activity; GO:0042744,hydrogen peroxide catabolic process; GO:0006979,response to oxidative stress; GO:0003674,molecular_function; GO:0005488,binding; GO:0046906,tetrapyrrole binding; GO:0097159,organic cyclic compound binding; GO:1901363,heterocyclic compound binding; GO:0043167,ion bindi…	Peroxidase	--	--	--
Cluster-11426.7	5.62	4.81	5.46	154.65	153.09	166.62	144	106	136	3336	3540	3592	4.84959	0	0	up	1333	K06911 quercetin 2,3-dioxygenase [EC:1.13.11.24] | (RefSeq) pirin-like protein At1g50590 (A)	--	pirin-like protein At1g50590 [Triticum dicoccoides]	PRNL1_ARATH RecName: Full=Pirin-like protein At1g50590;	A0A446T6C3_TRITD SubName: Full=Uncharacterized protein {ECO:0000313|EMBL:VAI18930.1};	--	GO:0005634,nucleus; GO:0005575,cellular_component; GO:0005622,intracellular anatomical structure; GO:0043226,organelle; GO:0043227,membrane-bounded organelle; GO:0043229,intracellular organelle; GO:0043231,intracellular membrane-bounded organelle; GO:0110165,cellular anatomical entity	Pirin	--	--	--
Cluster-114351.0	134.62	133.83	128.33	328.24	329.15	326.78	2749	2365	2535	5567	5993	5547	1.24759	0	0	up	1149	--	--	--	--	--	--	--	--	--	--	--
Cluster-117467.0	89.86	91.5	86.55	26.98	26.79	27.47	4678	4053	4424	1165	1284	1208	-1.76061	0	0	down	2493	K02303 uroporphyrin-III C-methyltransferase [EC:2.1.1.107] | (RefSeq) uncharacterized protein LOC109770081 (A)	ko00860: Porphyrin metabolism; ko01100: Metabolic pathways; ko01110: Biosynthesis of secondary metabolites; ko01240: Biosynthesis of cofactors	S-adenosyl-L-methionine-dependent uroporphyrinogen III methyltransferase, chloroplastic [Aegilops tauschii subsp. strangulata]	UPM1_ARATH RecName: Full=S-adenosyl-L-methionine-dependent uroporphyrinogen III methyltransferase, chloroplastic {ECO:0000303|PubMed:29472934, ECO:0000303|PubMed:9006913}; Short=Urophorphyrin III methylase {ECO:0000303|PubMed:29472934, ECO:0000303|PubMed:9006913}; EC=2.1.1.107 {ECO:0000269|PubMed:9006913}; AltName: Full=Urophorphyrin methylase 1 {ECO:0000303|PubMed:29472934, ECO:0000303|PubMed:90…	A0A453F3G3_AEGTS RecName: Full=TP_methylase domain-containing protein {ECO:0000259|Pfam:PF00590};	Uroporphyrin III methyltransferase	GO:0009507,chloroplast; GO:0004851,uroporphyrin-III C-methyltransferase activity; GO:0032259,methylation; GO:1902326,positive regulation of chlorophyll biosynthetic process; GO:0090352,regulation of nitrate assimilation; GO:1900058,regulation of sulfate assimilation; GO:0009416,response to light stimulus; GO:0019354,siroheme biosynthetic process; GO:0003674,molecular_function; GO:0003824,catalyti…	Tetrapyrrole (Corrin/Porphyrin) Methylases	--	--	--
Cluster-119232.28	191.88	190.82	203.68	399.46	387.18	401.01	4037	3393	3841	7057	7324	7090	1.01742	0	0	up	1153	no KO assigned | (RefSeq) beta-fructofuranosidase, insoluble isoenzyme 7-like (A)	--	unnamed protein product [Triticum turgidum subsp. durum]	6FEH_WHEAT RecName: Full=Fructan 6-exohydrolase {ECO:0000312|EMBL:CAJ28591.1}; EC=3.2.1.154; Flags: Precursor;	A0A453D3X6_AEGTS SubName: Full=Uncharacterized protein {ECO:0000313|EnsemblPlants:AET2Gv21077700.14};	Beta-fructofuranosidase (invertase)	GO:0033949,fructan beta-(2,6)-fructosidase activity; GO:0005975,carbohydrate metabolic process; GO:0003674,molecular_function; GO:0003824,catalytic activity; GO:0004553,hydrolase activity, hydrolyzing O-glycosyl compounds; GO:0016787,hydrolase activity; GO:0016798,hydrolase activity, acting on glycosyl bonds; GO:0008150,biological_process; GO:0008152,metabolic process; GO:0044238,primary metaboli…	Glycosyl hydrolases family 32 N-terminal domain	--	--	--
Cluster-120787.0	144.14	136.34	134.94	35.95	34.68	34.51	3428	2806	3118	719	743	691	-2.03105	0	0	down	1339	K00430 peroxidase [EC:1.11.1.7] | (RefSeq) peroxidase 25-like (A)	ko00940: Phenylpropanoid biosynthesis; ko01100: Metabolic pathways; ko01110: Biosynthesis of secondary metabolites	peroxidase 25-like [Triticum aestivum]	PER25_ARATH RecName: Full=Peroxidase 25; Short=Atperox P25; EC=1.11.1.7; Flags: Precursor;	A0A453EBF6_AEGTS RecName: Full=PEROXIDASE_4 domain-containing protein {ECO:0000259|PROSITE:PS50873};	--	GO:0005576,extracellular region; GO:0009505,plant-type cell wall; GO:0020037,heme binding; GO:0046872,metal ion binding; GO:0004601,peroxidase activity; GO:0042744,hydrogen peroxide catabolic process; GO:0006979,response to oxidative stress; GO:0003674,molecular_function; GO:0005488,binding; GO:0046906,tetrapyrrole binding; GO:0097159,organic cyclic compound binding; GO:1901363,heterocyclic compo…	Peroxidase	--	--	--
Cluster-121078.0	448.42	458.81	455.85	167.84	178.63	173.44	5143	4546	5076	1632	1854	1672	-1.43159	0	0	down	900	--	--	--	--	--	--	--	--	--	--	--
Cluster-121118.6	120.03	116.43	121.17	540.75	525.89	528.29	2647	2222	2596	10021	10456	9781	2.10654	0	0	up	1189	K08235 xyloglucan:xyloglucosyl transferase [EC:2.4.1.207] | (RefSeq) putative xyloglucan endotransglucosylase/hydrolase protein 13 (A)	--	hypothetical protein CFC21_018700 [Triticum aestivum]	XTH13_ARATH RecName: Full=Putative xyloglucan endotransglucosylase/hydrolase protein 13; Short=At-XTH13; Short=XTH-13; EC=2.4.1.207; Flags: Precursor;	A0A446LEM0_TRITD RecName: Full=Xyloglucan endotransglucosylase/hydrolase {ECO:0000256|RuleBase:RU361120}; EC=2.4.1.207 {ECO:0000256|RuleBase:RU361120};	--	GO:0048046,apoplast; GO:0004553,hydrolase activity, hydrolyzing O-glycosyl compounds; GO:0030247,polysaccharide binding; GO:0016762,xyloglucan:xyloglucosyl transferase activity; GO:0042546,cell wall biogenesis; GO:0071555,cell wall organization; GO:0010411,xyloglucan metabolic process; GO:0003674,molecular_function; GO:0003824,catalytic activity; GO:0016787,hydrolase activity; GO:0016798,hydrolas…	Glycosyl hydrolases family 16	--	--	--
Cluster-124058.5	67.14	67.03	66.36	32.59	31.19	31.86	8931	7709	8583	3654	3738	3579	-1.11404	0	0	down	5626	K00284 glutamate synthase (ferredoxin) [EC:1.4.7.1] | (RefSeq) ferredoxin-dependent glutamate synthase, chloroplastic (A)	ko00630: Glyoxylate and dicarboxylate metabolism; ko00910: Nitrogen metabolism	chloroplast ferredoxin-dependent glutamate synthase [Triticum aestivum]	GLTB_ORYSJ RecName: Full=Ferredoxin-dependent glutamate synthase, chloroplastic; EC=1.4.7.1; AltName: Full=Fd-GOGAT; Flags: Precursor;	A0A3Q8G2Y3_WHEAT SubName: Full=Chloroplast ferredoxin-dependent glutamate synthase {ECO:0000313|EMBL:AWT62511.1}; SubName: Full=Ferridoxin-glutamate synthase-A {ECO:0000313|EMBL:QOE77559.1};	Glutamate synthase	GO:0009507,chloroplast; GO:0051538,3 iron, 4 sulfur cluster binding; GO:0016041,glutamate synthase (ferredoxin) activity; GO:0016040,glutamate synthase (NADH) activity; GO:0015930,glutamate synthase activity; GO:0046872,metal ion binding; GO:0016491,oxidoreductase activity; GO:0019676,ammonia assimilation cycle; GO:0006537,glutamate biosynthetic process; GO:0097054,L-glutamate biosynthetic proces…	Glutamine amidotransferases class-II	--	--	--
Cluster-124484.4	142.34	135.44	130.51	391.12	391.63	373.4	3035	2500	2704	7009	7530	6684	1.45189	0	0	up	1160	--	--	chitinase 1 [Aegilops tauschii subsp. strangulata]	CHIT1_TULSB RecName: Full=Chitinase 1; EC=3.2.1.14; AltName: Full=Tulip bulb chitinase-1; Short=TBC-1; Flags: Precursor;	A0A452Z9J0_AEGTS RecName: Full=GH18 domain-containing protein {ECO:0000259|PROSITE:PS51910};	--	GO:0008061,chitin binding; GO:0004568,chitinase activity; GO:0006032,chitin catabolic process; GO:0000272,polysaccharide catabolic process; GO:0003674,molecular_function; GO:0005488,binding; GO:0097367,carbohydrate derivative binding; GO:0003824,catalytic activity; GO:0004553,hydrolase activity, hydrolyzing O-glycosyl compounds; GO:0016787,hydrolase activity; GO:0016798,hydrolase activity, acting…	Glycosyl hydrolases family 18	--	--	--
Cluster-124666.1	186.58	191.47	185.07	39.62	42.04	42.82	9439	8377	9101	1688	1916	1826	-2.22397	0	0	down	2330	--	--	uncharacterized protein LOC119362815 [Triticum dicoccoides]	--	A0A3B6C1U7_WHEAT SubName: Full=Uncharacterized protein {ECO:0000313|EnsemblPlants:TraesCS2B02G174500.1.cds1};	--	--	WD40-like Beta Propeller Repeat	--	--	--
Cluster-125946.0	90.48	90.04	94.18	262.23	263.05	269.47	3182	2739	3181	7697	8111	7868	1.4665	0	0	up	2153	K01456 peptide-N4-(N-acetyl-beta-glucosaminyl)asparagine amidase [EC:3.5.1.52] | (RefSeq) peptide-N(4)-(N-acetyl-beta- glucosaminyl)asparagine amidase isoform X1 (A)	ko04141: Protein processing in endoplasmic reticulum	probable aldo-keto reductase 3 [Aegilops tauschii subsp. strangulata]	IN22_MAIZE RecName: Full=IN2-2 protein;	A0A446L728_TRITD RecName: Full=Aldo_ket_red domain-containing protein {ECO:0000259|Pfam:PF00248};	Voltage-gated shaker-like K+ channel, subunit beta/KCNAB	GO:0005737,cytoplasm; GO:0004033,aldo-keto reductase (NADP) activity; GO:0003674,molecular_function; GO:0003824,catalytic activity; GO:0016491,oxidoreductase activity; GO:0016614,oxidoreductase activity, acting on CH-OH group of donors; GO:0016616,oxidoreductase activity, acting on the CH-OH group of donors, NAD or NADP as acceptor; GO:0005575,cellular_component; GO:0005622,intracellular anatomic…	Aldo/keto reductase family	--	--	--
Cluster-126085.1	357.53	360.4	366.66	120.21	121.32	123.12	13520	11794	13470	3826	4155	3922	-1.61754	0	0	down	3298	K02641 ferredoxin--NADP+ reductase [EC:1.18.1.2] | (RefSeq) ferredoxin--NADP reductase, root isozyme, chloroplastic (A)	ko00195: Photosynthesis; ko01100: Metabolic pathways	ferredoxin--NADP reductase, root isozyme, chloroplastic [Aegilops tauschii subsp. strangulata]	FENRO_ORYSJ RecName: Full=Ferredoxin--NADP reductase, root isozyme, chloroplastic; Short=FNR; EC=1.18.1.2; Flags: Precursor;	A0A453LZQ1_AEGTS RecName: Full=Ferredoxin--NADP reductase, chloroplastic {ECO:0000256|PIRNR:PIRNR000361}; Short=FNR {ECO:0000256|PIRNR:PIRNR000361}; EC=1.18.1.2 {ECO:0000256|PIRNR:PIRNR000361};	NADP/FAD dependent oxidoreductase	GO:0009507,chloroplast; GO:0031090,organelle membrane; GO:0031984,organelle subcompartment; GO:0004324,ferredoxin-NADP+ reductase activity; GO:0015979,photosynthesis; GO:0003674,molecular_function; GO:0003824,catalytic activity; GO:0008937,ferredoxin-NAD(P) reductase activity; GO:0016491,oxidoreductase activity; GO:0016730,oxidoreductase activity, acting on iron-sulfur proteins as donors; GO:0016…	Oxidoreductase NAD-binding domain	--	--	--
Cluster-126757.0	599.15	589.71	547.37	127.39	131.57	128.59	9890	8472	8783	1771	1960	1778	-2.21527	0	0	down	1039	K01674 carbonic anhydrase [EC:4.2.1.1] | (RefSeq) alpha carbonic anhydrase 7-like (A)	ko00910: Nitrogen metabolism; ko01100: Metabolic pathways	dio1 [Dioscorea alata]	DIOA3_DIOJA RecName: Full=Dioscorin dioA3 {ECO:0000305}; EC=1.6.5.4 {ECO:0000269|PubMed:22195572}; EC=4.2.1.1 {ECO:0000269|PubMed:22195572, ECO:0000269|PubMed:25747844}; AltName: Full=Dj-dio5 {ECO:0000303|PubMed:22806688}; AltName: Full=Dj-dioA3 {ECO:0000303|PubMed:22796748, ECO:0000303|PubMed:22806688}; AltName: Full=Tuber storage protein dioA3 {ECO:0000305}; Flags: Precursor;	A0A1P8PPN9_DIOAL SubName: Full=Dio1 {ECO:0000313|EMBL:APX64494.1};	Carbonic anhydrase	GO:0016209,antioxidant activity; GO:0004089,carbonate dehydratase activity; GO:0031418,L-ascorbic acid binding; GO:0016656,monodehydroascorbate reductase (NADH) activity; GO:0045735,nutrient reservoir activity; GO:0042803,protein homodimerization activity; GO:0004867,serine-type endopeptidase inhibitor activity; GO:0008270,zinc ion binding; GO:0015976,carbon utilization; GO:0098869,cellular oxida…	Eukaryotic-type carbonic anhydrase	--	--	--
Cluster-128098.0	537.33	559.17	536.54	271.66	270.73	279.81	17038	15359	16572	7226	7738	7476	-1.04032	0	0	down	1615	K22374 3''-deamino-3''-oxonicotianamine reductase [EC:1.1.1.285] | (RefSeq) deoxymugineic acid synthase 1-D-like (A)	ko00999: Biosynthesis of various plant secondary metabolites; ko01100: Metabolic pathways; ko01110: Biosynthesis of secondary metabolites	deoxymugineic acid synthase 1-D-like [Triticum urartu]	DMS1D_WHEAT RecName: Full=Deoxymugineic acid synthase 1-D {ECO:0000303|PubMed:28475636}; EC=1.1.1.285 {ECO:0000250|UniProtKB:W5DYE3};	A0A3B6DFG8_WHEAT RecName: Full=Aldo_ket_red domain-containing protein {ECO:0000259|Pfam:PF00248};	Aldo/keto reductase family proteins	GO:0005829,cytosol; GO:0033707,3''-deamino-3''-oxonicotianamine reductase activity; GO:0004032,alditol:NADP+ 1-oxidoreductase activity; GO:1990641,response to iron ion starvation; GO:0019290,siderophore biosynthetic process; GO:0003674,molecular_function; GO:0003824,catalytic activity; GO:0016491,oxidoreductase activity; GO:0016614,oxidoreductase activity, acting on CH-OH group of donors; GO:0016…	Aldo/keto reductase family	--	--	--
Cluster-129663.1	94.64	94.58	96.33	33.85	33.34	34.14	16379	14153	16210	4940	5199	4991	-1.54023	0	0	down	7227	K00264 glutamate synthase (NADH) [EC:1.4.1.14] | (RefSeq) glutamate synthase 1 [NADH], chloroplastic-like isoform X1 (A)	ko00250: Alanine, aspartate and glutamate metabolism; ko00910: Nitrogen metabolism; ko01100: Metabolic pathways; ko01110: Biosynthesis of secondary metabolites; ko01230: Biosynthesis of amino acids	unnamed protein product [Triticum turgidum subsp. durum]	GLT1_ORYSJ RecName: Full=Glutamate synthase 1 [NADH], chloroplastic; EC=1.4.1.14; AltName: Full=NADH-dependent glutamate synthase 1; Short=NADH-GOGAT 1; Flags: Precursor;	A0A446PXJ4_TRITD RecName: Full=Glutamate synthase (NADH) {ECO:0000256|ARBA:ARBA00024383}; EC=1.4.1.14 {ECO:0000256|ARBA:ARBA00024383};	Glutamate synthase	GO:0009507,chloroplast; GO:0009536,plastid; GO:0051538,3 iron, 4 sulfur cluster binding; GO:0050660,flavin adenine dinucleotide binding; GO:0010181,FMN binding; GO:0016040,glutamate synthase (NADH) activity; GO:0015930,glutamate synthase activity; GO:0005506,iron ion binding; GO:0016491,oxidoreductase activity; GO:0019676,ammonia assimilation cycle; GO:0048589,developmental growth; GO:0006537,glu…	Glutamine amidotransferases class-II	--	--	--
Cluster-12978.1	4.58	3.15	4.1	77.7	78.17	66.59	181	116	171	2556	2617	2187	4.06554	0	0	up	2195	--	--	--	--	--	--	--	Family of unknown function (DUF5874)	--	--	--
Cluster-130069.1	146	144.58	144.29	312.3	322.83	320.89	3447	2956	3310	6201	6873	6363	1.08723	0	0	up	1252	--	--	hypothetical protein TRIUR3_26766 [Triticum urartu]	SRS1_ORYSI RecName: Full=Salt stress root protein RS1;	M7ZP50_TRIUA SubName: Full=Uncharacterized protein {ECO:0000313|EMBL:EMS54120.1, ECO:0000313|EnsemblPlants:TRIUR3_26766-P1};	--	GO:0046658,anchored component of plasma membrane; GO:0005575,cellular_component; GO:0005886,plasma membrane; GO:0016020,membrane; GO:0031224,intrinsic component of membrane; GO:0031225,anchored component of membrane; GO:0031226,intrinsic component of plasma membrane; GO:0071944,cell periphery; GO:0110165,cellular anatomical entity	DREPP plasma membrane polypeptide	--	--	--
Cluster-131782.4	11.51	13	13.79	148.13	145.39	128.18	283	276	329	3064	3224	2649	3.41569	0	0	up	1291	K20547 basic endochitinase B [EC:3.2.1.14] | (RefSeq) chitinase 7 (A)	ko00520: Amino sugar and nucleotide sugar metabolism; ko01100: Metabolic pathways; ko04016: MAPK signaling pathway - plant	chitinase [Oryza sativa Indica Group]	CHI7_ORYSJ RecName: Full=Chitinase 7; EC=3.2.1.14 {ECO:0000269|PubMed:10890535}; AltName: Full=Class I chitinase d; Short=OsChia1d; AltName: Full=Pathogenesis related (PR)-3 chitinase 7; Flags: Precursor;	A0A0D3G7D5_9ORYZ RecName: Full=Chitinase {ECO:0000256|ARBA:ARBA00012729}; EC=3.2.1.14 {ECO:0000256|ARBA:ARBA00012729};	Predicted chitinase	GO:0008061,chitin binding; GO:0004568,chitinase activity; GO:0016998,cell wall macromolecule catabolic process; GO:0006032,chitin catabolic process; GO:0050832,defense response to fungus; GO:0000272,polysaccharide catabolic process; GO:0003674,molecular_function; GO:0005488,binding; GO:0097367,carbohydrate derivative binding; GO:0003824,catalytic activity; GO:0004553,hydrolase activity, hydrolyzi…	Chitinase class I	--	--	--
Cluster-132567.13	1552.69	1624.2	1756.08	733.57	702.25	724.57	24171	21234	23280	8194	8992	8630	-1.32573	0	0	down	1604	K19891 glucan endo-1,3-beta-glucosidase 1/2/3 [EC:3.2.1.39] | (RefSeq) hypothetical protein (A)	ko00500: Starch and sucrose metabolism; ko01100: Metabolic pathways	glucan endo-1,3-beta-glucosidase 13-like [Triticum dicoccoides]	E1313_ARATH RecName: Full=Glucan endo-1,3-beta-glucosidase 13; EC=3.2.1.39; AltName: Full=(1->3)-beta-glucan endohydrolase 13; Short=(1->3)-beta-glucanase 13; AltName: Full=Beta-1,3-endoglucanase 13; Short=Beta-1,3-glucanase 13; Flags: Precursor;	A0A3B6A1X7_WHEAT SubName: Full=Uncharacterized protein {ECO:0000313|EnsemblPlants:TraesCS1D02G431200.1};	--	GO:0031225,anchored component of membrane; GO:0046658,anchored component of plasma membrane; GO:0005576,extracellular region; GO:0005886,plasma membrane; GO:0009536,plastid; GO:0042973,glucan endo-1,3-beta-D-glucosidase activity; GO:0005975,carbohydrate metabolic process; GO:0071555,cell wall organization; GO:0006952,defense response; GO:0003674,molecular_function; GO:0003824,catalytic activity; …	X8 domain	--	--	--
Cluster-132567.8	678.21	669.58	686.4	277.52	284.31	306.17	16790	14321	16477	5811	6364	6364	-1.27243	0	0	down	1449	no KO assigned | (RefSeq) glucan endo-1,3-beta-glucosidase-like (A)	--	unnamed protein product [Triticum turgidum subsp. durum]	E13C_MUSAC RecName: Full=Glucan endo-1,3-beta-glucosidase {ECO:0000305}; EC=3.2.1.39 {ECO:0000269|PubMed:10672030}; AltName: Full=Beta-1,3-glucanase {ECO:0000303|PubMed:10672030}; AltName: Allergen=Mus a 5 {ECO:0000305}; Flags: Precursor;	A0A446KDH6_TRITD SubName: Full=Uncharacterized protein {ECO:0000313|EMBL:VAH23440.1};	--	GO:0042973,glucan endo-1,3-beta-D-glucosidase activity; GO:0005975,carbohydrate metabolic process; GO:0003674,molecular_function; GO:0003824,catalytic activity; GO:0004553,hydrolase activity, hydrolyzing O-glycosyl compounds; GO:0008422,beta-glucosidase activity; GO:0015926,glucosidase activity; GO:0016787,hydrolase activity; GO:0016798,hydrolase activity, acting on glycosyl bonds; GO:0008150,bio…	Protein of unknown function (DUF429)	--	--	--
Cluster-133730.4	35.29	38.06	37.79	132.48	125.36	131.16	3424	3194	3565	10839	10964	10746	1.7626	0	0	up	4188	K01953 asparagine synthase (glutamine-hydrolysing) [EC:6.3.5.4] | (RefSeq) asparagine synthetase [glutamine-hydrolyzing] (A)	ko00250: Alanine, aspartate and glutamate metabolism; ko01100: Metabolic pathways; ko01110: Biosynthesis of secondary metabolites; ko01230: Biosynthesis of amino acids	asparagine synthetase-1 [Secale cereale]	ASNS_ASPOF RecName: Full=Asparagine synthetase [glutamine-hydrolyzing]; Short=AS; EC=6.3.5.4;	A0A167LAA4_SECCE RecName: Full=Asparagine synthetase [glutamine-hydrolyzing] {ECO:0000256|PIRNR:PIRNR001589}; EC=6.3.5.4 {ECO:0000256|PIRNR:PIRNR001589};	Asparagine synthase (glutamine-hydrolyzing)	GO:0004066,asparagine synthase (glutamine-hydrolyzing) activity; GO:0005524,ATP binding; GO:0006541,glutamine metabolic process; GO:0070981,L-asparagine biosynthetic process; GO:0003674,molecular_function; GO:0003824,catalytic activity; GO:0016874,ligase activity; GO:0016879,ligase activity, forming carbon-nitrogen bonds; GO:0016884,carbon-nitrogen ligase activity, with glutamine as amido-N-donor…	Asparagine synthase	--	--	--
Cluster-133819.6	69.24	68.37	67.46	16.35	15.55	18.04	2837	2429	2724	563	573	620	-2.0982	0	0	down	2791	K05666 ATP-binding cassette, subfamily C (CFTR/MRP), member 2 | (RefSeq) ABC transporter C family member 10-like isoform X1 (A)	ko02010: ABC transporters	unnamed protein product [Triticum turgidum subsp. durum]	ZIF1_ARATH RecName: Full=Protein ZINC INDUCED FACILITATOR 1;	A0A446TN33_TRITD RecName: Full=MFS domain-containing protein {ECO:0000259|PROSITE:PS50850};	Permease of the major facilitator superfamily	GO:0016021,integral component of membrane; GO:0009705,plant-type vacuole membrane; GO:0005886,plasma membrane; GO:0022821,solute:potassium antiporter activity; GO:0090333,regulation of stomatal closure; GO:0009624,response to nematode; GO:0010043,response to zinc ion; GO:0055069,zinc ion homeostasis; GO:0003674,molecular_function; GO:0005215,transporter activity; GO:0008324,cation transmembrane t…	--	--	--	--
Cluster-135930.7	542.47	567.47	563.03	1450.29	1437.43	1454.55	12055	10912	12157	27084	28804	27138	1.32692	0	0	up	1196	--	--	dormancy-associated protein 1 [Aegilops tauschii subsp. strangulata]	12KD_FRAAN RecName: Full=Auxin-repressed 12.5 kDa protein;	A0A453HCF6_AEGTS SubName: Full=Uncharacterized protein {ECO:0000313|EnsemblPlants:AET4Gv20144400.10};	--	GO:0009734,auxin-activated signaling pathway; GO:0007154,cell communication; GO:0007165,signal transduction; GO:0008150,biological_process; GO:0009719,response to endogenous stimulus; GO:0009725,response to hormone; GO:0009733,response to auxin; GO:0009755,hormone-mediated signaling pathway; GO:0009987,cellular process; GO:0010033,response to organic substance; GO:0023052,signaling; GO:0032870,ce…	Dormancy/auxin associated protein	--	--	--
Cluster-141332.49	21.48	23.33	22.93	100.27	104.41	104.12	640	605	693	2553	2823	2684	2.1418	0	0	up	1957	K13065 shikimate O-hydroxycinnamoyltransferase [EC:2.3.1.133] | (RefSeq) agmatine coumaroyltransferase-2-like (A)	ko00940: Phenylpropanoid biosynthesis; ko00941: Flavonoid biosynthesis; ko00945: Stilbenoid, diarylheptanoid and gingerol biosynthesis; ko01100: Metabolic pathways; ko01110: Biosynthesis of secondary metabolites	unnamed protein product [Triticum turgidum subsp. durum]	THT2_ORYSJ RecName: Full=Tryptamine hydroxycinnamoyltransferase 2 {ECO:0000305}; Short=OsTHT2 {ECO:0000303|PubMed:27354554}; EC=2.3.1.- {ECO:0000305};	A0A446LP76_TRITD SubName: Full=Uncharacterized protein {ECO:0000313|EMBL:VAH39395.1};	--	GO:0016747,acyltransferase activity, transferring groups other than amino-acyl groups; GO:0050734,hydroxycinnamoyltransferase activity; GO:0003674,molecular_function; GO:0003824,catalytic activity; GO:0016740,transferase activity; GO:0016746,acyltransferase activity	Transferase family	--	--	--
Cluster-141332.51	38.91	43.05	42.91	184.1	188.2	190.92	927	909	976	3657	3949	3656	2.08652	0	0	up	1488	K13065 shikimate O-hydroxycinnamoyltransferase [EC:2.3.1.133] | (RefSeq) agmatine coumaroyltransferase-2-like (A)	ko00940: Phenylpropanoid biosynthesis; ko00941: Flavonoid biosynthesis; ko00945: Stilbenoid, diarylheptanoid and gingerol biosynthesis; ko01100: Metabolic pathways; ko01110: Biosynthesis of secondary metabolites	tryptamine hydroxycinnamoyltransferase 2 [Aegilops tauschii subsp. strangulata]	THT2_ORYSJ RecName: Full=Tryptamine hydroxycinnamoyltransferase 2 {ECO:0000305}; Short=OsTHT2 {ECO:0000303|PubMed:27354554}; EC=2.3.1.- {ECO:0000305};	A0A452XYL1_AEGTS SubName: Full=Uncharacterized protein {ECO:0000313|EnsemblPlants:AET1Gv20220200.1};	--	GO:0016747,acyltransferase activity, transferring groups other than amino-acyl groups; GO:0050734,hydroxycinnamoyltransferase activity; GO:0003674,molecular_function; GO:0003824,catalytic activity; GO:0016740,transferase activity; GO:0016746,acyltransferase activity	Transferase family	--	--	--
Cluster-153.3	282.49	283.53	279.73	69.76	68.45	70.54	13412	11647	12913	2790	2929	2822	-2.06582	0	0	down	2322	K00366 ferredoxin-nitrite reductase [EC:1.7.7.1] | (RefSeq) ferredoxin--nitrite reductase, chloroplastic (A)	ko00910: Nitrogen metabolism; ko01100: Metabolic pathways	ferredoxin--nitrite reductase, chloroplastic [Triticum dicoccoides]	NIR_ORYSJ RecName: Full=Ferredoxin--nitrite reductase, chloroplastic; EC=1.7.7.1; Flags: Precursor;	A0A446WN05_TRITD SubName: Full=Uncharacterized protein {ECO:0000313|EMBL:VAI61517.1};	Sulfite reductase (ferredoxin)	GO:0009507,chloroplast; GO:0051539,4 iron, 4 sulfur cluster binding; GO:0048307,ferredoxin-nitrite reductase activity; GO:0020037,heme binding; GO:0046872,metal ion binding; GO:0042128,nitrate assimilation; GO:0003674,molecular_function; GO:0005488,binding; GO:0051536,iron-sulfur cluster binding; GO:0051540,metal cluster binding; GO:0003824,catalytic activity; GO:0016491,oxidoreductase activity; …	Nitrite and sulphite reductase 4Fe-4S domain	--	--	--
Cluster-17277.1	16.62	14.77	16.8	189.06	198.62	200.11	573	443	564	5490	6180	5815	3.55567	0	0	up	1767	K06911 quercetin 2,3-dioxygenase [EC:1.13.11.24] | (RefSeq) pirin-like protein (A)	--	pirin-like protein isoform X3 [Triticum aestivum]	PIRL_SOLLC RecName: Full=Pirin-like protein;	A0A3B6N2Q8_WHEAT SubName: Full=Uncharacterized protein {ECO:0000313|EnsemblPlants:TraesCS5D02G533500.1};	--	GO:0005634,nucleus; GO:0005575,cellular_component; GO:0005622,intracellular anatomical structure; GO:0043226,organelle; GO:0043227,membrane-bounded organelle; GO:0043229,intracellular organelle; GO:0043231,intracellular membrane-bounded organelle; GO:0110165,cellular anatomical entity	Pirin C-terminal cupin domain	--	--	--
Cluster-24362.8	57.52	61.31	61.22	215.88	215.61	218.75	3360	3097	3477	10624	11351	10776	1.80695	0	0	up	2643	K06617 raffinose synthase [EC:2.4.1.82] | (RefSeq) probable galactinol--sucrose galactosyltransferase 2 (A)	ko00052: Galactose metabolism; ko01100: Metabolic pathways	unnamed protein product [Triticum turgidum subsp. durum]	RFS2_ARATH RecName: Full=Probable galactinol--sucrose galactosyltransferase 2; EC=2.4.1.82; AltName: Full=Protein SEED IMBIBITION 2; AltName: Full=Raffinose synthase 2;	A0A446PGC8_TRITD RecName: Full=Galactinol--sucrose galactosyltransferase {ECO:0000256|ARBA:ARBA00012708}; EC=2.4.1.82 {ECO:0000256|ARBA:ARBA00012708};	--	GO:0009506,plasmodesma; GO:0016757,glycosyltransferase activity; GO:0052692,raffinose alpha-galactosidase activity; GO:0034484,raffinose catabolic process; GO:0006979,response to oxidative stress; GO:0003674,molecular_function; GO:0003824,catalytic activity; GO:0016740,transferase activity; GO:0004553,hydrolase activity, hydrolyzing O-glycosyl compounds; GO:0004557,alpha-galactosidase activity; G…	Raffinose synthase or seed imbibition protein Sip1	--	--	--
Cluster-25950.1	46.63	47.94	48.76	132.16	135.7	134.45	1538	1356	1563	3668	4018	3720	1.44197	0	0	up	1626	K17506 protein phosphatase 1L [EC:3.1.3.16] | (RefSeq) probable protein phosphatase 2C 32 (A)	--	probable protein phosphatase 2C 32 [Triticum dicoccoides]	P2C32_ORYSJ RecName: Full=Probable protein phosphatase 2C 32; Short=OsPP2C32; EC=3.1.3.16;	A0A453AJX0_AEGTS RecName: Full=Protein-serine/threonine phosphatase {ECO:0000256|ARBA:ARBA00013081}; EC=3.1.3.16 {ECO:0000256|ARBA:ARBA00013081};	Serine/threonine protein phosphatase	GO:0016021,integral component of membrane; GO:0046872,metal ion binding; GO:0017018,myosin phosphatase activity; GO:0006470,protein dephosphorylation; GO:0003674,molecular_function; GO:0005488,binding; GO:0043167,ion binding; GO:0043169,cation binding; GO:0003824,catalytic activity; GO:0004721,phosphoprotein phosphatase activity; GO:0004722,protein serine/threonine phosphatase activity; GO:001678…	Protein phosphatase 2C	--	--	--
Cluster-2791.17	138.38	142.77	138.43	318.46	321.09	327.02	2466	2203	2397	4766	5161	4886	1.15396	0	0	up	1020	--	--	Bowman-Birk type trypsin inhibitor-like isoform X1 [Triticum dicoccoides]	IBB_HORVU RecName: Full=Bowman-Birk type trypsin inhibitor;	A0A446PAI9_TRITD SubName: Full=Uncharacterized protein {ECO:0000313|EMBL:VAH71439.1};	--	GO:0005576,extracellular region; GO:0004867,serine-type endopeptidase inhibitor activity; GO:0003674,molecular_function; GO:0004857,enzyme inhibitor activity; GO:0004866,endopeptidase inhibitor activity; GO:0030234,enzyme regulator activity; GO:0030414,peptidase inhibitor activity; GO:0061134,peptidase regulator activity; GO:0061135,endopeptidase regulator activity; GO:0098772,molecular function …	Bowman-Birk serine protease inhibitor family	--	--	--
Cluster-37837.6	2.22	3.58	2.37	52.34	52.42	50.55	80	68	83	1591	1554	1537	4.42937	0	0	up	1752	K16292 KDEL-tailed cysteine endopeptidase [EC:3.4.22.-] | (RefSeq) thiol protease SEN102-like (A)	--	unnamed protein product [Triticum turgidum subsp. durum]	CYSP_HEMSP RecName: Full=Thiol protease SEN102; EC=3.4.22.-; Flags: Precursor;	A0A446Q433_TRITD SubName: Full=Uncharacterized protein {ECO:0000313|EMBL:VAH81372.1};	Cysteine proteinase Cathepsin L	GO:0005788,endoplasmic reticulum lumen; GO:0008234,cysteine-type peptidase activity; GO:0006508,proteolysis; GO:0003674,molecular_function; GO:0003824,catalytic activity; GO:0008233,peptidase activity; GO:0016787,hydrolase activity; GO:0140096,catalytic activity, acting on a protein; GO:0006807,nitrogen compound metabolic process; GO:0008150,biological_process; GO:0008152,metabolic process; GO:00…	Papain family cysteine protease	--	--	--
Cluster-45980.4	33.3	35.21	36.01	188.36	187.49	191.97	685	625	718	3250	3467	3308	2.39193	0	0	up	1210	--	--	UPF0098 protein CPn_0877/CP_0992/CPj0877/CpB0906-like [Lolium rigidum]	--	A0A452ZBP4_AEGTS SubName: Full=Uncharacterized protein {ECO:0000313|EnsemblPlants:AET1Gv20703200.2};	--	--	Phosphatidylethanolamine-binding protein	--	--	--
Cluster-512.10	114.81	127.28	42.72	107.71	214.83	169.41	3091	2722	3073	6472	7041	6220	1.23683	0	0	up	3688	K01206 alpha-L-fucosidase [EC:3.2.1.51] | (RefSeq) FXG1; alpha-fucosidase 1 (A)	ko00511: Other glycan degradation	unnamed protein product [Triticum turgidum subsp. durum]	ACHE_MAIZE RecName: Full=GDSL esterase/lipase ACHE {ECO:0000305}; EC=3.1.1.- {ECO:0000269|PubMed:15980188}; AltName: Full=Acetylcholinesterase {ECO:0000303|PubMed:15980188}; Short=AChE {ECO:0000303|PubMed:15980188}; Flags: Precursor;	A0A446N082_TRITD SubName: Full=Uncharacterized protein {ECO:0000313|EMBL:VAH55469.1};	--	GO:0005576,extracellular region; GO:0052689,carboxylic ester hydrolase activity; GO:0006581,acetylcholine catabolic process; GO:0016042,lipid catabolic process; GO:0003674,molecular_function; GO:0003824,catalytic activity; GO:0016787,hydrolase activity; GO:0016788,hydrolase activity, acting on ester bonds; GO:0001505,regulation of neurotransmitter levels; GO:0006807,nitrogen compound metabolic pr…	GDSL-like Lipase/Acylhydrolase	--	--	--
Cluster-55097.0	127.3	127.77	133.04	309.7	308.33	311.06	3702	3215	3760	7576	8083	7608	1.2107	0	0	up	1470	K12581 CCR4-NOT transcription complex subunit 7/8 | (RefSeq) probable CCR4-associated factor 1 homolog 7 (A)	ko03018: RNA degradation	hypothetical protein ZWY2020_036984 [Hordeum vulgare]	CAF1G_ARATH RecName: Full=Probable CCR4-associated factor 1 homolog 7; EC=3.1.13.4;	A0A453KX92_AEGTS RecName: Full=Poly(A)-specific ribonuclease {ECO:0000256|ARBA:ARBA00012161}; EC=3.1.13.4 {ECO:0000256|ARBA:ARBA00012161};	mRNA deadenylase subunit	GO:0030015,CCR4-NOT core complex; GO:0005634,nucleus; GO:0000932,P-body; GO:0046872,metal ion binding; GO:0004535,poly(A)-specific ribonuclease activity; GO:0003723,RNA binding; GO:0043928,exonucleolytic catabolism of deadenylated mRNA; GO:0003674,molecular_function; GO:0005488,binding; GO:0043167,ion binding; GO:0043169,cation binding; GO:0000175,3'-5'-exoribonuclease activity; GO:0003824,cataly…	CAF1 family ribonuclease	--	--	--
Cluster-59997.24	14.12	14.52	61.06	459.75	632.91	470.4	144	128	130	1907	2086	1749	3.92136	0	0	up	715	K22464 fatty acid photodecarboxylase [EC:4.1.1.106] | (RefSeq) hypothetical protein (A)	--	hypothetical protein [Adiantum nelumboides]	FAP_CHLVA RecName: Full=Fatty acid photodecarboxylase, chloroplastic {ECO:0000303|PubMed:28860382}; Short=CvFAP {ECO:0000303|PubMed:28860382}; EC=4.1.1.106 {ECO:0000269|PubMed:28860382}; Flags: Precursor;	F0Y388_AURAN RecName: Full=GMC_oxred_C domain-containing protein {ECO:0000259|Pfam:PF05199}; Flags: Fragment;	Glucose dehydrogenase/choline dehydrogenase/mandelonitrile lyase (GMC oxidoreductase family)	GO:0009507,chloroplast; GO:0050660,flavin adenine dinucleotide binding; GO:0016829,lyase activity; GO:0016614,oxidoreductase activity, acting on CH-OH group of donors; GO:0000166,nucleotide binding; GO:0003674,molecular_function; GO:0005488,binding; GO:0036094,small molecule binding; GO:0043167,ion binding; GO:0043168,anion binding; GO:0097159,organic cyclic compound binding; GO:1901265,nucleosid…	GMC oxidoreductase	--	--	--
Cluster-59997.3	4.3	5.87	5.43	73.63	72.59	65.86	200	214	223	2870	3035	2575	3.81835	0	0	up	2170	K22464 fatty acid photodecarboxylase [EC:4.1.1.106] | (RefSeq) alcohol oxidase (A)	--	hypothetical protein FH972_021340 [Carpinus fangiana]	FAP_CHLVA RecName: Full=Fatty acid photodecarboxylase, chloroplastic {ECO:0000303|PubMed:28860382}; Short=CvFAP {ECO:0000303|PubMed:28860382}; EC=4.1.1.106 {ECO:0000269|PubMed:28860382}; Flags: Precursor;	A0A8K1CHZ1_PYTOL SubName: Full=Uncharacterized protein {ECO:0000313|EMBL:TMW63318.1};	Glucose dehydrogenase/choline dehydrogenase/mandelonitrile lyase (GMC oxidoreductase family)	GO:0009507,chloroplast; GO:0050660,flavin adenine dinucleotide binding; GO:0016829,lyase activity; GO:0016614,oxidoreductase activity, acting on CH-OH group of donors; GO:0000166,nucleotide binding; GO:0003674,molecular_function; GO:0005488,binding; GO:0036094,small molecule binding; GO:0043167,ion binding; GO:0043168,anion binding; GO:0097159,organic cyclic compound binding; GO:1901265,nucleosid…	GMC oxidoreductase	--	--	--
Cluster-6067.29	190.97	174.97	187.12	43.47	44.33	47.28	2573	2170	2434	522	572	566	-2.02496	0	0	down	880	no KO assigned | (RefSeq) glucan endo-1,3-beta-glucosidase-like (A)	--	unnamed protein product [Triticum turgidum subsp. durum]	E13A_HORVU RecName: Full=Glucan endo-1,3-beta-glucosidase GI; EC=3.2.1.39; AltName: Full=(1->3)-beta-glucan endohydrolase GI; AltName: Full=(1->3)-beta-glucanase isoenzyme GI; AltName: Full=Beta-1,3-endoglucanase GI;	A0A446P3V9_TRITD SubName: Full=Uncharacterized protein {ECO:0000313|EMBL:VAH69007.1};	--	GO:0042973,glucan endo-1,3-beta-D-glucosidase activity; GO:0005975,carbohydrate metabolic process; GO:0006952,defense response; GO:0003674,molecular_function; GO:0003824,catalytic activity; GO:0004553,hydrolase activity, hydrolyzing O-glycosyl compounds; GO:0008422,beta-glucosidase activity; GO:0015926,glucosidase activity; GO:0016787,hydrolase activity; GO:0016798,hydrolase activity, acting on g…	Glycosyl hydrolases family 17	--	--	--
Cluster-74659.1	160.49	158.7	153.03	339.83	337.67	333.84	4120	3525	3818	7336	7814	7202	1.04995	0	0	up	1452	K22588 acetylserotonin O-methyltransferase, plant [EC:2.1.1.4] | (RefSeq) trans-resveratrol di-O-methyltransferase-like (A)	ko00380: Tryptophan metabolism; ko01100: Metabolic pathways; ko01110: Biosynthesis of secondary metabolites	unnamed protein product [Triticum turgidum subsp. durum]	Y1103_ORYSJ RecName: Full=Flavonoid O-methyltransferase-like protein Os11g0303600 {ECO:0000305}; EC=2.1.1.- {ECO:0000305};	A0A446MXZ0_TRITD SubName: Full=Uncharacterized protein {ECO:0000313|EMBL:VAH54697.1};	Hydroxyindole-O-methyltransferase and related SAM-dependent methyltransferases	GO:0008171,O-methyltransferase activity; GO:0046983,protein dimerization activity; GO:0008757,S-adenosylmethionine-dependent methyltransferase activity; GO:0019438,aromatic compound biosynthetic process; GO:0032259,methylation; GO:0003674,molecular_function; GO:0003824,catalytic activity; GO:0008168,methyltransferase activity; GO:0016740,transferase activity; GO:0016741,transferase activity, tran…	O-methyltransferase domain	--	--	--
Cluster-8103.1	100.73	97.61	99.45	24.11	25.73	26.36	8454	7084	8115	1705	1946	1867	-2.01249	0	0	down	3663	K10534 nitrate reductase (NAD(P)H) [EC:1.7.1.1 1.7.1.2 1.7.1.3] | (RefSeq) nitrate reductase [NAD(P)H] (A)	ko00910: Nitrogen metabolism; ko01100: Metabolic pathways	nitrate reductase [NAD(P)H]	NIA7_HORVU RecName: Full=Nitrate reductase [NAD(P)H]; EC=1.7.1.2;	A0A446WML7_TRITD RecName: Full=Nitrate reductase {ECO:0000256|PIRNR:PIRNR000233};	Sulfite oxidase, molybdopterin-binding component	GO:0031090,organelle membrane; GO:0031984,organelle subcompartment; GO:0071949,FAD binding; GO:0020037,heme binding; GO:0030151,molybdenum ion binding; GO:0043546,molybdopterin cofactor binding; GO:0009703,nitrate reductase (NADH) activity; GO:0050464,nitrate reductase (NADPH) activity; GO:0042128,nitrate assimilation; GO:0006809,nitric oxide biosynthetic process; GO:0000166,nucleotide binding; G…	Oxidoreductase molybdopterin binding domain	--	--	--
Cluster-82681.1	49.14	50.39	46.46	172.44	169.81	181.86	1788	1586	1643	5281	5569	5571	1.79702	0	0	up	1762	--	--	protein PHOSPHATE-INDUCED 1 homolog [Triticum dicoccoides]	PHI1_TOBAC RecName: Full=Protein PHOSPHATE-INDUCED 1 {ECO:0000303|PubMed:10189698}; Flags: Precursor;	A0A446X746_TRITD SubName: Full=Uncharacterized protein {ECO:0000313|EMBL:VAI72114.1};	--	GO:0048046,apoplast; GO:0005615,extracellular space; GO:0005575,cellular_component; GO:0005576,extracellular region; GO:0110165,cellular anatomical entity	Phosphate-induced protein 1 conserved region	--	--	--
Cluster-83072.0	718.13	717.7	709.92	363.27	364.1	381.33	20166	17438	19373	8580	9217	9004	-1.00128	0	0	down	1430	K00430 peroxidase [EC:1.11.1.7] | (RefSeq) peroxidase 47-like (A)	ko00940: Phenylpropanoid biosynthesis; ko01100: Metabolic pathways; ko01110: Biosynthesis of secondary metabolites	unnamed protein product [Triticum turgidum subsp. durum]	PER47_ARATH RecName: Full=Peroxidase 47; Short=Atperox P47; EC=1.11.1.7; AltName: Full=ATP32; Flags: Precursor;	A0A453S1Q9_AEGTS RecName: Full=Peroxidase {ECO:0000256|RuleBase:RU362060}; EC=1.11.1.7 {ECO:0000256|RuleBase:RU362060};	--	GO:0005576,extracellular region; GO:0009505,plant-type cell wall; GO:0020037,heme binding; GO:0046872,metal ion binding; GO:0004601,peroxidase activity; GO:0042744,hydrogen peroxide catabolic process; GO:0006979,response to oxidative stress; GO:0003674,molecular_function; GO:0005488,binding; GO:0046906,tetrapyrrole binding; GO:0097159,organic cyclic compound binding; GO:1901363,heterocyclic compo…	Peroxidase	--	--	--
Cluster-83453.7	405.75	420.66	402.04	134.38	129.67	128.58	8157	7319	7851	2269	2350	2168	-1.69563	0	0	down	1111	K00430 peroxidase [EC:1.11.1.7] | (RefSeq) peroxidase 1 (A)	ko00940: Phenylpropanoid biosynthesis; ko01100: Metabolic pathways; ko01110: Biosynthesis of secondary metabolites	peroxidase 2 [Triticum monococcum]	PER1_HORVU RecName: Full=Peroxidase 1; EC=1.11.1.7; Flags: Precursor;	Q5I3F6_TRIMO RecName: Full=Peroxidase {ECO:0000256|RuleBase:RU362060}; EC=1.11.1.7 {ECO:0000256|RuleBase:RU362060};	--	GO:0005576,extracellular region; GO:0020037,heme binding; GO:0046872,metal ion binding; GO:0004601,peroxidase activity; GO:0042744,hydrogen peroxide catabolic process; GO:0006979,response to oxidative stress; GO:0003674,molecular_function; GO:0005488,binding; GO:0046906,tetrapyrrole binding; GO:0097159,organic cyclic compound binding; GO:1901363,heterocyclic compound binding; GO:0043167,ion bindi…	Peroxidase	--	--	--
Cluster-83453.8	818.16	760.78	822.3	358.41	294.92	260.13	8187	7357	7943	2082	2220	2074	-1.79564	0	0	down	947	K00430 peroxidase [EC:1.11.1.7] | (RefSeq) peroxidase-like (A)	ko00940: Phenylpropanoid biosynthesis; ko01100: Metabolic pathways; ko01110: Biosynthesis of secondary metabolites	peroxidase-like [Triticum dicoccoides]	PER1_WHEAT RecName: Full=Peroxidase; EC=1.11.1.7; AltName: Full=WP2; Flags: Precursor;	A0A7H4LCL5_WHEAT RecName: Full=Peroxidase {ECO:0000256|RuleBase:RU362060}; EC=1.11.1.7 {ECO:0000256|RuleBase:RU362060};	--	GO:0005576,extracellular region; GO:0020037,heme binding; GO:0046872,metal ion binding; GO:0004601,peroxidase activity; GO:0042744,hydrogen peroxide catabolic process; GO:0006979,response to oxidative stress; GO:0003674,molecular_function; GO:0005488,binding; GO:0046906,tetrapyrrole binding; GO:0097159,organic cyclic compound binding; GO:1901363,heterocyclic compound binding; GO:0043167,ion bindi…	Peroxidase	--	--	--
Cluster-86032.0	4.92	4.25	4.52	61.28	60.63	58.72	206	154	184	2161	2289	2072	3.67109	0	0	up	1982	--	--	--	--	--	--	--	MAPEG family	--	--	--
Cluster-86237.0	7.06	7.88	7.23	110.89	105.14	114.9	115	110	112	1495	1531	1558	3.85272	0	0	up	1029	--	--	--	--	--	--	--	--	--	--	--
Cluster-86629.11	387.6	390.26	394.36	145.27	139.2	147.84	16894	14713	16708	5331	5468	5429	-1.4867	0	0	down	2050	K05907 adenylyl-sulfate reductase (glutathione) [EC:1.8.4.9] | (RefSeq) probable 5'-adenylylsulfate reductase 1, chloroplastic (A)	ko00920: Sulfur metabolism; ko01100: Metabolic pathways	probable 5'-adenylylsulfate reductase 1, chloroplastic [Triticum urartu]	APR1_ORYSJ RecName: Full=Probable 5'-adenylylsulfate reductase 1, chloroplastic; EC=1.8.4.9; AltName: Full=Adenosine 5'-phosphosulfate 5'-adenylylsulfate sulfotransferase 1; Short=APS sulfotransferase 1; AltName: Full=Adenosine 5'-phosphosulfate reductase-like 1; Short=APR-like1; Short=OsAPRL1; AltName: Full=Thioredoxin-independent APS reductase 1; Flags: Precursor;	M7YY72_TRIUA SubName: Full=Putative 5'-adenylylsulfate reductase 1, chloroplastic {ECO:0000313|EMBL:EMS45005.1, ECO:0000313|EnsemblPlants:TRIUR3_33107-P1};	Phosphoadenosine phosphosulfate reductase	GO:0009507,chloroplast; GO:0051539,4 iron, 4 sulfur cluster binding; GO:0033741,adenylyl-sulfate reductase (glutathione) activity; GO:0046872,metal ion binding; GO:0019344,cysteine biosynthetic process; GO:0019419,sulfate reduction; GO:0003674,molecular_function; GO:0005488,binding; GO:0051536,iron-sulfur cluster binding; GO:0051540,metal cluster binding; GO:0003824,catalytic activity; GO:0016491…	Phosphoadenosine phosphosulfate reductase family	--	--	--
Cluster-90785.2	131.32	131.29	132.6	55.58	55.55	57.5	21186	18312	20803	7569	8082	7848	-1.27256	0	0	down	7075	K01595 phosphoenolpyruvate carboxylase [EC:4.1.1.31] | (RefSeq) phosphoenolpyruvate carboxylase 2 (A)	ko00620: Pyruvate metabolism; ko00710: Carbon fixation in photosynthetic organisms; ko01100: Metabolic pathways; ko01200: Carbon metabolism	phosphoenolpyruvate carboxylase 2 [Triticum dicoccoides]	CAPP2_SORBI RecName: Full=Phosphoenolpyruvate carboxylase 2; Short=PEPC 2; Short=PEPCase 2; EC=4.1.1.31; AltName: Full=CP28;	A0A3B6LL76_WHEAT RecName: Full=Phosphoenolpyruvate carboxylase {ECO:0000256|ARBA:ARBA00012305}; EC=4.1.1.31 {ECO:0000256|ARBA:ARBA00012305};	--	GO:0005737,cytoplasm; GO:0008964,phosphoenolpyruvate carboxylase activity; GO:0015977,carbon fixation; GO:0015979,photosynthesis; GO:0006099,tricarboxylic acid cycle; GO:0003674,molecular_function; GO:0003824,catalytic activity; GO:0004611,phosphoenolpyruvate carboxykinase activity; GO:0016829,lyase activity; GO:0016830,carbon-carbon lyase activity; GO:0016831,carboxy-lyase activity; GO:0008150,b…	Protein phosphatase 2C	--	--	--
Cluster-95581.0	542.1	568.91	533.52	136.35	147.32	134.19	13230	12014	12651	2797	3241	2751	-2.02502	0	0	down	1283	--	--	hypothetical protein ZWY2020_009293 [Hordeum vulgare]	--	A0A453AYV1_AEGTS SubName: Full=Uncharacterized protein {ECO:0000313|EnsemblPlants:AET2Gv20307900.2};	--	--	--	--	--	--
Cluster-95581.1	830.81	854.72	838.15	359.73	383.24	381.38	20275	18050	19875	7380	8431	7819	-1.21534	0	0	down	1283	--	--	hypothetical protein ZWY2020_009293 [Hordeum vulgare]	--	A0A453AYY3_AEGTS SubName: Full=Uncharacterized protein {ECO:0000313|EnsemblPlants:AET2Gv20307900.1};	--	--	--	--	--	--
Cluster-97633.0	255.63	266.03	255.62	538.11	547.75	553.32	5774	5188	5604	10186	11142	10493	1.02735	0	0	up	1606	--	--	unnamed protein product [Triticum turgidum subsp. durum]	DI191_ORYSJ RecName: Full=Protein DEHYDRATION-INDUCED 19; AltName: Full=OsDi19;	A0A452ZW97_AEGTS SubName: Full=Uncharacterized protein {ECO:0000313|EnsemblPlants:AET1Gv20947000.5};	--	--	--	--	--	--
Cluster-97869.0	133.35	129.5	128.11	31.33	30.93	30.42	8119	6819	7583	1607	1697	1562	-2.12329	0	0	down	2742	K00033 6-phosphogluconate dehydrogenase [EC:1.1.1.44 1.1.1.343] | (RefSeq) 6-phosphogluconate dehydrogenase, decarboxylating 2, chloroplastic (A)	ko00030: Pentose phosphate pathway; ko00480: Glutathione metabolism; ko01100: Metabolic pathways; ko01110: Biosynthesis of secondary metabolites; ko01200: Carbon metabolism	6-phosphogluconate dehydrogenase, decarboxylating 2, chloroplastic-like [Triticum aestivum]	6PGD2_ORYSJ RecName: Full=6-phosphogluconate dehydrogenase, decarboxylating 2, chloroplastic; Short=OsG6PGH2; EC=1.1.1.44; Flags: Precursor;	A0A452ZNT6_AEGTS RecName: Full=6-phosphogluconate dehydrogenase, decarboxylating {ECO:0000256|PIRNR:PIRNR000109, ECO:0000256|RuleBase:RU000485}; EC=1.1.1.44 {ECO:0000256|PIRNR:PIRNR000109, ECO:0000256|RuleBase:RU000485};	6-phosphogluconate dehydrogenase	GO:0009507,chloroplast; GO:0005829,cytosol; GO:0050661,NADP binding; GO:0004616,phosphogluconate dehydrogenase (decarboxylating) activity; GO:0046177,D-gluconate catabolic process; GO:0009051,pentose-phosphate shunt, oxidative branch; GO:0009737,response to abscisic acid; GO:0009409,response to cold; GO:0009651,response to salt stress; GO:0009414,response to water deprivation; GO:0000166,nucleoti…	6-phosphogluconate dehydrogenase, C-terminal domain	--	--	--
Cluster-75352.0	20.38	19.79	20.86	75.6	72.32	78.35	966	811	961	3017	3089	3129	1.84238	5.47052e-308	5.71889e-305	up	2202	--	--	hypothetical protein CFC21_067802 [Triticum aestivum]	ZFP1_WHEAT RecName: Full=Zinc finger protein 1; AltName: Full=WZF1;	A0A3B6MX14_WHEAT SubName: Full=Uncharacterized protein {ECO:0000313|EnsemblPlants:TraesCS5D02G411400.1.cds1};	FOG: Zn-finger	GO:0005634,nucleus; GO:0003677,DNA binding; GO:0003700,DNA-binding transcription factor activity; GO:0046872,metal ion binding; GO:0003674,molecular_function; GO:0003676,nucleic acid binding; GO:0005488,binding; GO:0097159,organic cyclic compound binding; GO:1901363,heterocyclic compound binding; GO:0140110,transcription regulator activity; GO:0043167,ion binding; GO:0043169,cation binding; GO:00…	C2H2-type zinc finger	C2H2	TF	C2H2
Cluster-6067.28	141.73	145.76	140.46	345.38	343.65	354.78	2019	1798	1943	4127	4416	4228	1.23497	3.33339e-301	3.3507e-298	up	877	no KO assigned | (RefSeq) glucan endo-1,3-beta-glucosidase-like (A)	--	unnamed protein product [Triticum turgidum subsp. durum]	E13A_HORVU RecName: Full=Glucan endo-1,3-beta-glucosidase GI; EC=3.2.1.39; AltName: Full=(1->3)-beta-glucan endohydrolase GI; AltName: Full=(1->3)-beta-glucanase isoenzyme GI; AltName: Full=Beta-1,3-endoglucanase GI;	A0A446P3T5_TRITD SubName: Full=Uncharacterized protein {ECO:0000313|EMBL:VAH69098.1};	--	GO:0042973,glucan endo-1,3-beta-D-glucosidase activity; GO:0005975,carbohydrate metabolic process; GO:0006952,defense response; GO:0003674,molecular_function; GO:0003824,catalytic activity; GO:0004553,hydrolase activity, hydrolyzing O-glycosyl compounds; GO:0008422,beta-glucosidase activity; GO:0015926,glucosidase activity; GO:0016787,hydrolase activity; GO:0016798,hydrolase activity, acting on g…	Glycosyl hydrolases family 17	--	--	--
Cluster-125072.0	23.36	22.05	20.06	83.64	83.23	83.02	854	733	780	2560	2818	2742	1.86495	1.99792e-300	1.98287e-297	up	2522	K10446 kelch-like protein 8 | (RefSeq) hypothetical protein (A)	--	F-box/kelch-repeat protein At1g80440-like [Triticum aestivum]	FBK30_ARATH RecName: Full=F-box/kelch-repeat protein At1g80440;	A0A446YLS3_TRITD RecName: Full=F-box domain-containing protein {ECO:0000259|Pfam:PF00646};	FOG: Kelch repeat	GO:0005829,cytosol; GO:0019005,SCF ubiquitin ligase complex; GO:0080037,negative regulation of cytokinin-activated signaling pathway; GO:2000762,regulation of phenylpropanoid metabolic process; GO:0007154,cell communication; GO:0007165,signal transduction; GO:0008150,biological_process; GO:0009719,response to endogenous stimulus; GO:0009725,response to hormone; GO:0009735,response to cytokinin; G…	Kelch motif	--	--	--
Cluster-55574.0	12.89	12.86	12.74	43.93	47.45	46.88	952	821	915	2734	3158	2921	1.799	3.35741e-300	3.29048e-297	up	3260	K14544 U3 small nucleolar RNA-associated protein 22 | (RefSeq) hypothetical protein (A)	ko03008: Ribosome biogenesis in eukaryotes	phosphatidylinositol 4-kinase gamma 5-like [Triticum dicoccoides]	P4KG7_ARATH RecName: Full=Phosphatidylinositol 4-kinase gamma 7 {ECO:0000303|PubMed:17880284}; Short=AtPI4Kgamma7 {ECO:0000303|PubMed:17880284}; Short=PI-4Kgamma7 {ECO:0000303|PubMed:17880284}; Short=PI4K gamma 7 {ECO:0000303|PubMed:17880284}; EC=2.7.1.67 {ECO:0000269|PubMed:17880284}; AltName: Full=Ubiquitin-like domain kinase gamma 7 {ECO:0000303|PubMed:17880284}; Short=UbDK gamma 7 {ECO:000030…	M8CCU7_AEGTA RecName: Full=1-phosphatidylinositol 4-kinase {ECO:0000256|ARBA:ARBA00012169}; EC=2.7.1.67 {ECO:0000256|ARBA:ARBA00012169};	Phosphatidylinositol 4-kinase	GO:0004430,1-phosphatidylinositol 4-kinase activity; GO:0005524,ATP binding; GO:0046854,phosphatidylinositol phosphate biosynthetic process; GO:0046777,protein autophosphorylation; GO:0003674,molecular_function; GO:0003824,catalytic activity; GO:0016301,kinase activity; GO:0016740,transferase activity; GO:0016772,transferase activity, transferring phosphorus-containing groups; GO:0016773,phosphot…	Phosphatidylinositol 3- and 4-kinase	--	--	--
Cluster-78338.2	346.08	320.63	331.25	968.23	917.46	919.33	2216	1781	2056	5154	5305	4858	1.42771	2.86228e-297	2.73679e-294	up	563	K25108 licheninase [EC:3.2.1.73] | (RefSeq) lichenase-2 (A)	--	(1,3;1,4) beta-glucanase, partial [Triticum aestivum]	GUB2_HORVU RecName: Full=Lichenase-2; EC=3.2.1.73; AltName: Full=(1->3,1->4)-beta-glucanase isoenzyme EII; AltName: Full=Endo-beta-1,3-1,4 glucanase II; AltName: Full=Lichenase II; Flags: Precursor; Fragment;	Q2V6H6_WHEAT SubName: Full=(1,3;1,4) beta-glucanase {ECO:0000313|EMBL:ABB96917.1}; Flags: Fragment;	--	GO:0042972,licheninase activity; GO:0005975,carbohydrate metabolic process; GO:0003674,molecular_function; GO:0003824,catalytic activity; GO:0004553,hydrolase activity, hydrolyzing O-glycosyl compounds; GO:0016787,hydrolase activity; GO:0016798,hydrolase activity, acting on glycosyl bonds; GO:0008150,biological_process; GO:0008152,metabolic process; GO:0044238,primary metabolic process; GO:007170…	Glycosyl hydrolases family 17	--	--	--
Cluster-124654.8	316.77	320.1	302.25	106.88	106.13	104.69	3698	3215	3413	1042	1126	1016	-1.61155	4.65409e-295	4.39644e-292	down	832	--	--	non-specific lipid-transfer protein 2-like [Triticum dicoccoides]	NLTPX_ORYSI RecName: Full=Non-specific lipid-transfer protein 2; Short=nsLTP2; AltName: Full=7 kDa lipid transfer protein; Flags: Precursor;	A0A452ZSI9_AEGTS SubName: Full=Uncharacterized protein {ECO:0000313|EnsemblPlants:AET1Gv20900900.4};	--	GO:0008289,lipid binding; GO:0006869,lipid transport; GO:0003674,molecular_function; GO:0005488,binding; GO:0006810,transport; GO:0008150,biological_process; GO:0010876,lipid localization; GO:0033036,macromolecule localization; GO:0051179,localization; GO:0051234,establishment of localization; GO:0071702,organic substance transport	--	--	--	--
Cluster-86680.0	472.32	466.59	465.63	206.16	217.18	227.38	11395	9760	10896	4176	4737	4619	-1.15735	3.06114e-289	2.82363e-286	down	1871	K00430 peroxidase [EC:1.11.1.7] | (RefSeq) peroxidase 2 (A)	ko00940: Phenylpropanoid biosynthesis; ko01100: Metabolic pathways; ko01110: Biosynthesis of secondary metabolites	peroxidase 5 [Aegilops tauschii subsp. strangulata]	PER5_VITVI RecName: Full=Peroxidase 5 {ECO:0000250|UniProtKB:P22195}; EC=1.11.1.7; Flags: Precursor;	A0A453JMD3_AEGTS RecName: Full=Peroxidase {ECO:0000256|RuleBase:RU362060}; EC=1.11.1.7 {ECO:0000256|RuleBase:RU362060};	--	GO:0005576,extracellular region; GO:0020037,heme binding; GO:0046872,metal ion binding; GO:0004601,peroxidase activity; GO:0042744,hydrogen peroxide catabolic process; GO:0006979,response to oxidative stress; GO:0003674,molecular_function; GO:0005488,binding; GO:0046906,tetrapyrrole binding; GO:0097159,organic cyclic compound binding; GO:1901363,heterocyclic compound binding; GO:0043167,ion bindi…	Peroxidase	--	--	--
Cluster-119481.0	99.39	102.96	90.34	31.44	32.96	33.07	5189	4273	4571	1387	1521	1392	-1.61941	1.95481e-286	1.74167e-283	down	4191	K25075 pterocarpan synthase [EC:4.2.1.139] | (RefSeq) hypothetical protein (A)	ko00943: Isoflavonoid biosynthesis; ko01100: Metabolic pathways; ko01110: Biosynthesis of secondary metabolites	dirigent protein 1-like [Lolium perenne]	DIR1_ARATH RecName: Full=Dirigent protein 1; Short=AtDIR1; Flags: Precursor;	A0A3B6J0E5_WHEAT RecName: Full=Dirigent protein {ECO:0000256|RuleBase:RU363099};	--	GO:0048046,apoplast; GO:0009699,phenylpropanoid biosynthetic process; GO:0006725,cellular aromatic compound metabolic process; GO:0008150,biological_process; GO:0008152,metabolic process; GO:0009058,biosynthetic process; GO:0009698,phenylpropanoid metabolic process; GO:0009987,cellular process; GO:0019438,aromatic compound biosynthetic process; GO:0019748,secondary metabolic process; GO:0044237,c…	Dirigent-like protein	--	--	--
Cluster-107021.1	195.26	228.59	200.1	741.69	723.81	734.13	2675	2712	2662	8518	8943	8407	1.76616	8.49738e-284	7.48581e-281	up	855	K25108 licheninase [EC:3.2.1.73] | (RefSeq) lichenase-2 (A)	--	Lichenase-2 [Triticum urartu]	GUB2_HORVU RecName: Full=Lichenase-2; EC=3.2.1.73; AltName: Full=(1->3,1->4)-beta-glucanase isoenzyme EII; AltName: Full=Endo-beta-1,3-1,4 glucanase II; AltName: Full=Lichenase II; Flags: Precursor; Fragment;	M7YWE0_TRIUA SubName: Full=Lichenase-2 {ECO:0000313|EMBL:EMS51456.1, ECO:0000313|EnsemblPlants:TRIUR3_32481-P1};	--	GO:0042972,licheninase activity; GO:0005975,carbohydrate metabolic process; GO:0003674,molecular_function; GO:0003824,catalytic activity; GO:0004553,hydrolase activity, hydrolyzing O-glycosyl compounds; GO:0016787,hydrolase activity; GO:0016798,hydrolase activity, acting on glycosyl bonds; GO:0008150,biological_process; GO:0008152,metabolic process; GO:0044238,primary metabolic process; GO:007170…	Glycosyl hydrolases family 17	--	--	--
Cluster-121449.3	12.39	12.34	11.1	81.06	79.16	75.92	298	256	259	1639	1716	1534	2.6744	9.03456e-282	7.87061e-279	up	1269	--	--	--	--	--	--	--	--	--	--	--
Cluster-117765.4	202.57	205.39	206.69	81.12	81.75	88.15	4538	3982	4499	1527	1651	1658	-1.34201	1.96165e-274	1.67177e-271	down	1203	--	--	unnamed protein product [Triticum turgidum subsp. durum]	GL41_ORYSJ RecName: Full=Germin-like protein 4-1; Flags: Precursor;	A0A453CYV7_AEGTS RecName: Full=Germin-like protein {ECO:0000256|RuleBase:RU366015};	--	GO:0048046,apoplast; GO:0030145,manganese ion binding; GO:0003674,molecular_function; GO:0005488,binding; GO:0043167,ion binding; GO:0043169,cation binding; GO:0046872,metal ion binding; GO:0046914,transition metal ion binding; GO:0005575,cellular_component; GO:0005576,extracellular region; GO:0110165,cellular anatomical entity	Cupin	--	--	--
Cluster-87523.0	62.8	65.44	65.24	1.96	1.51	2.15	1566	1412	1581	32	34	45	-5.27407	6.01e-273	5.06681e-270	down	1305	--	--	mucin-5AC-like [Quercus suber]	--	--	--	--	--	--	--	--
Cluster-113244.1	175.81	182.61	177.17	25.86	23.81	26.6	1538	1385	1504	189	188	193	-2.87132	1.85524e-272	1.53116e-269	down	657	--	--	hypothetical protein ZWY2020_020529 [Hordeum vulgare]	--	A0A8I6WEZ0_HORVV SubName: Full=Uncharacterized protein {ECO:0000313|EnsemblPlants:HORVU.MOREX.r3.1HG0087060.1.CDS1};	--	--	--	--	--	--
Cluster-71574.0	251.21	256.08	245.56	91.25	95.71	88.46	3781	3337	3589	1152	1299	1114	-1.5015	6.86204e-263	5.54658e-260	down	909	--	--	hypothetical protein EJB05_26703, partial [Eragrostis curvula]	--	A0A5J9ULY2_9POAL SubName: Full=Uncharacterized protein {ECO:0000313|EMBL:TVU24281.1}; Flags: Fragment;	--	--	--	--	--	--
Cluster-104690.0	145.57	144.5	138.94	316.57	340.51	321.26	5089	4370	4721	9314	10730	9454	1.14191	7.8396e-263	6.27208e-260	up	1705	--	--	zinc finger A20 and AN1 domain-containing stress-associated protein 1-like [Triticum aestivum]	SAP1_ORYSI RecName: Full=Zinc finger A20 and AN1 domain-containing stress-associated protein 1; Short=OsSAP1; AltName: Full=Multiple stress-responsive zinc finger protein ISAP1; Short=OsiSAP1;	A0A446UDZ0_TRITD SubName: Full=Uncharacterized protein {ECO:0000313|EMBL:VAI33814.1};	Predicted Zn-finger protein	GO:0003677,DNA binding; GO:0008270,zinc ion binding; GO:0003674,molecular_function; GO:0003676,nucleic acid binding; GO:0005488,binding; GO:0097159,organic cyclic compound binding; GO:1901363,heterocyclic compound binding; GO:0043167,ion binding; GO:0043169,cation binding; GO:0046872,metal ion binding; GO:0046914,transition metal ion binding	Gametogenetin	--	--	--
Cluster-83453.11	673.34	678.74	692.98	223.73	236.78	227.83	2875	2513	2862	792	909	786	-1.64411	8.08405e-262	6.40232e-259	down	476	K00430 peroxidase [EC:1.11.1.7] | (RefSeq) peroxidase 1 (A)	ko00940: Phenylpropanoid biosynthesis; ko01100: Metabolic pathways; ko01110: Biosynthesis of secondary metabolites	peroxidase 1 [Triticum aestivum]	PER1_HORVU RecName: Full=Peroxidase 1; EC=1.11.1.7; Flags: Precursor;	Q43212_WHEAT RecName: Full=Peroxidase {ECO:0000256|RuleBase:RU362060}; EC=1.11.1.7 {ECO:0000256|RuleBase:RU362060}; Flags: Precursor;	--	GO:0005576,extracellular region; GO:0020037,heme binding; GO:0046872,metal ion binding; GO:0004601,peroxidase activity; GO:0042744,hydrogen peroxide catabolic process; GO:0006979,response to oxidative stress; GO:0003674,molecular_function; GO:0005488,binding; GO:0046906,tetrapyrrole binding; GO:0097159,organic cyclic compound binding; GO:1901363,heterocyclic compound binding; GO:0043167,ion bindi…	Peroxidase	--	--	--
Cluster-102984.0	637.39	629.19	613.36	231.73	251.17	264.58	10821	9247	10114	3302	3845	3763	-1.38178	3.83963e-260	2.98066e-257	down	986	--	--	predicted protein [Hordeum vulgare subsp. vulgare]	--	F2DML3_HORVV SubName: Full=Predicted protein {ECO:0000313|EMBL:BAJ96334.1};	--	--	--	--	--	--
Cluster-120192.1	20.32	18.8	17.08	146.68	152.07	136.79	273	218	223	1653	1844	1537	2.90349	7.47324e-256	5.68873e-253	up	845	--	--	--	--	--	--	--	Cerato-platanin	--	--	--
Cluster-128259.3	125.57	122.97	126.02	55.2	52.86	55.3	4031	3416	3932	1491	1529	1494	-1.24624	5.40305e-250	4.07333e-247	down	1591	K06215 pyridoxal 5'-phosphate synthase pdxS subunit [EC:4.3.3.6] | (RefSeq) probable pyridoxal 5'-phosphate synthase subunit PDX1.1 (A)	ko00750: Vitamin B6 metabolism; ko01100: Metabolic pathways; ko01240: Biosynthesis of cofactors	probable pyridoxal 5'-phosphate synthase subunit PDX1.1 [Triticum aestivum]	PDX11_ORYSJ RecName: Full=Probable pyridoxal 5'-phosphate synthase subunit PDX1.1; Short=PLP synthase subunit PDX1.1; EC=4.3.3.6;	A0A446MAA7_TRITD RecName: Full=SOR_SNZ domain-containing protein {ECO:0000259|Pfam:PF01680};	Stationary phase-induced protein, SOR/SNZ family	GO:0016843,amine-lyase activity; GO:0036381,pyridoxal 5'-phosphate synthase (glutamine hydrolysing) activity; GO:0006520,cellular amino acid metabolic process; GO:0042823,pyridoxal phosphate biosynthetic process; GO:0008615,pyridoxine biosynthetic process; GO:0003674,molecular_function; GO:0003824,catalytic activity; GO:0016829,lyase activity; GO:0016840,carbon-nitrogen lyase activity; GO:0006082…	SOR/SNZ family	--	--	--
Cluster-51180.3	4.44	4.74	4.63	32.71	31.47	28.73	305	287	300	1844	1905	1622	2.67492	3.14857e-248	2.35108e-245	up	3111	--	--	glycogen [starch]	--	A0A1D1ZHG2_9ARAE RecName: Full=Glycogen [starch] synthase {ECO:0000256|RuleBase:RU363104}; EC=2.4.1.11 {ECO:0000256|RuleBase:RU363104};	Glycogen synthase	GO:0004373,glycogen (starch) synthase activity; GO:0005978,glycogen biosynthetic process; GO:0003674,molecular_function; GO:0003824,catalytic activity; GO:0008194,UDP-glycosyltransferase activity; GO:0016740,transferase activity; GO:0016757,glycosyltransferase activity; GO:0016758,hexosyltransferase activity; GO:0035251,UDP-glucosyltransferase activity; GO:0046527,glucosyltransferase activity; GO…	Glycogen synthase	--	--	--
Cluster-67672.0	5.44	5.13	5.48	46.07	42.86	40.87	207	170	204	1480	1475	1316	2.96572	6.23163e-246	4.48248e-243	up	1983	K05917 sterol 14alpha-demethylase [EC:1.14.14.154 1.14.15.36] | (RefSeq) obtusifoliol 14-alpha demethylase-like (A)	ko00100: Steroid biosynthesis; ko01100: Metabolic pathways; ko01110: Biosynthesis of secondary metabolites	obtusifoliol 14-alpha demethylase-like [Triticum dicoccoides]	CP51_SORBI RecName: Full=Obtusifoliol 14-alpha demethylase; EC=1.14.14.154; AltName: Full=CYPLI; AltName: Full=Cytochrome P450 51; AltName: Full=Cytochrome P450-LIA1;	T1NRB6_TRIUA SubName: Full=Uncharacterized protein {ECO:0000313|EnsemblPlants:TRIUR3_33337-P1};	Cytochrome P450	GO:0016021,integral component of membrane; GO:0020037,heme binding; GO:0005506,iron ion binding; GO:0008168,methyltransferase activity; GO:0008398,sterol 14-demethylase activity; GO:0032259,methylation; GO:0016126,sterol biosynthetic process; GO:0003674,molecular_function; GO:0005488,binding; GO:0046906,tetrapyrrole binding; GO:0097159,organic cyclic compound binding; GO:1901363,heterocyclic comp…	Cytochrome P450	--	--	--
Cluster-131588.3	6.64	5.63	5.29	121.19	118.54	105.66	98	60	63	1494	1571	1299	4.392	2.15245e-245	1.5342e-242	up	925	K03809 NAD(P)H dehydrogenase (quinone) [EC:1.6.5.2] | (RefSeq) probable 1,4-benzoquinone reductase (A)	ko00130: Ubiquinone and other terpenoid-quinone biosynthesis; ko01100: Metabolic pathways; ko01110: Biosynthesis of secondary metabolites; ko01240: Biosynthesis of cofactors	hypothetical protein BT93_L5914 [Corymbia citriodora subsp. variegata]	QR2_TRIVS RecName: Full=Quinone-oxidoreductase QR2 {ECO:0000303|PubMed:11260494}; Short=TvQR2 {ECO:0000303|PubMed:11260494}; EC=1.6.5.2 {ECO:0000269|Ref.2};	M1UVW4_CYAM1 SubName: Full=Probable 1,4-benzoquinone reductase {ECO:0000313|EMBL:BAM82206.1};	1,4-benzoquinone reductase-like; Trp repressor binding protein-like/protoplast-secreted protein	GO:0010181,FMN binding; GO:0050136,NADH dehydrogenase (quinone) activity; GO:0008753,NADPH dehydrogenase (quinone) activity; GO:0000166,nucleotide binding; GO:0003674,molecular_function; GO:0005488,binding; GO:0032553,ribonucleotide binding; GO:0036094,small molecule binding; GO:0043167,ion binding; GO:0043168,anion binding; GO:0097159,organic cyclic compound binding; GO:0097367,carbohydrate deri…	NADPH-dependent FMN reductase	--	--	--
Cluster-74221.4	215.21	213.81	220.02	482.18	458.73	470.48	2647	2291	2652	4986	5107	4877	1.06726	9.99148e-242	7.0575e-239	up	1241	K03541 photosystem II 10kDa protein | (RefSeq) photosystem II 10 kDa polypeptide, chloroplastic-like isoform X1 (A)	ko00195: Photosynthesis; ko01100: Metabolic pathways	photosystem II 10 kDa polypeptide, chloroplastic-like isoform X1 [Triticum aestivum]	PSBR_HORVU RecName: Full=Photosystem II 10 kDa polypeptide, chloroplastic; Flags: Precursor;	A0A3B6PUD8_WHEAT RecName: Full=Photosystem II 10 kDa polypeptide, chloroplastic {ECO:0000256|ARBA:ARBA00018725};	--	GO:0009535,chloroplast thylakoid membrane; GO:0009654,photosystem II oxygen evolving complex; GO:0015979,photosynthesis; GO:0008150,biological_process; GO:0008152,metabolic process; GO:0009987,cellular process; GO:0044237,cellular metabolic process; GO:0005575,cellular_component; GO:0005622,intracellular anatomical structure; GO:0005737,cytoplasm; GO:0009507,chloroplast; GO:0009526,plastid envelo…	--	--	--	--
Cluster-93458.15	75.15	78.1	82.1	162.72	161.35	166.49	10942	9832	11624	19977	21170	20476	1.01432	3.72466e-241	2.60743e-238	up	6129	K10640 E3 ubiquitin-protein ligase RNF25 [EC:2.3.2.27] | (RefSeq) uncharacterized protein LOC118034067 (A)	--	hypothetical protein MTR_0021s0160 [Medicago truncatula]	--	A0A368UH67_SOYBN SubName: Full=Uncharacterized protein {ECO:0000313|EMBL:RCW19059.1, ECO:0000313|EnsemblPlants:RCW19059};	--	--	--	--	--	--
Cluster-86707.7	7.69	7.14	6.39	69.49	75.32	81.34	154	121	123	1209	1394	1380	3.40999	8.45568e-241	5.86697e-238	up	2691	K16871 4-aminobutyrate---pyruvate transaminase [EC:2.6.1.96] | (RefSeq) probable gamma-aminobutyrate transaminase 4 (A)	ko00250: Alanine, aspartate and glutamate metabolism; ko00650: Butanoate metabolism; ko01100: Metabolic pathways	hypothetical protein DAI22_02g010200 [Oryza sativa Japonica Group]	GATP4_ORYSJ RecName: Full=Probable gamma-aminobutyrate transaminase 4; Short=OsGABA-T; EC=2.6.1.96;	A0A0E0CDU0_9ORYZ SubName: Full=Uncharacterized protein {ECO:0000313|EnsemblPlants:OMERI02G00440.1};	Alanine-glyoxylate aminotransferase AGT2	GO:0005737,cytoplasm; GO:0003867,4-aminobutyrate transaminase activity; GO:0034387,4-aminobutyrate:pyruvate transaminase activity; GO:0004015,adenosylmethionine-8-amino-7-oxononanoate transaminase activity; GO:0102351,gamma-aminobutyrate transaminase (glyoxylate dependent) activity; GO:0030170,pyridoxal phosphate binding; GO:0009102,biotin biosynthetic process; GO:0009448,gamma-aminobutyric acid …	Aminotransferase class-III	--	--	--
Cluster-103693.1	172.42	185.19	180.52	382.28	381.85	367.22	3055	2817	2963	5631	5942	5645	1.04799	4.19267e-240	2.85849e-237	up	1306	K07025 putative hydrolase of the HAD superfamily | (RefSeq) suppressor of disruption of TFIIS-like (A)	--	suppressor of disruption of TFIIS-like [Triticum urartu]	--	A0A3B6I011_WHEAT SubName: Full=Uncharacterized protein {ECO:0000313|EnsemblPlants:TraesCS4A02G275300.2};	Haloacid dehalogenase-like hydrolase	--	--	--	--	--
Cluster-116080.9	31.74	29.86	29.61	2.98	3.4	3.21	1349	1098	1223	106	130	114	-3.30302	2.02574e-234	1.346e-231	down	2007	K03444 MFS transporter, SP family, ERD6-like sugar transporter | (RefSeq) sugar transporter ERD6-like 5 isoform X2 (A)	--	general alpha-glucoside permease-like [Quercus suber]	PLST4_ARATH RecName: Full=Plastidic glucose transporter 4; Short=AtpGlcT;	A0A0D6QRE2_ARACU RecName: Full=MFS domain-containing protein {ECO:0000259|PROSITE:PS50850};	Predicted transporter (major facilitator superfamily)	GO:0009941,chloroplast envelope; GO:0009706,chloroplast inner membrane; GO:0016021,integral component of membrane; GO:0016020,membrane; GO:0009536,plastid; GO:0005351,carbohydrate:proton symporter activity; GO:0008643,carbohydrate transport; GO:0003674,molecular_function; GO:0005215,transporter activity; GO:0005402,carbohydrate:cation symporter activity; GO:0008324,cation transmembrane transporte…	Sugar (and other) transporter	--	--	--
Cluster-48370.4	75.69	75.11	73.91	35.35	37.79	36.35	5077	4359	4811	2000	2273	2056	-1.08449	5.50897e-234	3.62967e-231	down	3006	K24195 xenotropic and polytropic retrovirus receptor 1 | (RefSeq) phosphate transporter PHO1-2-like (A)	--	phosphate transporter PHO1-2 isoform X2 [Aegilops tauschii subsp. strangulata]	PHO12_ORYSJ RecName: Full=Phosphate transporter PHO1-2; AltName: Full=Protein PHO1-2; Short=OsPHO1;2;	A0A453Q0H7_AEGTS SubName: Full=Uncharacterized protein {ECO:0000313|EnsemblPlants:AET6Gv20932200.9};	Predicted small molecule transporter	GO:0005737,cytoplasm; GO:0005794,Golgi apparatus; GO:0016021,integral component of membrane; GO:0005886,plasma membrane; GO:0000822,inositol hexakisphosphate binding; GO:0015114,phosphate ion transmembrane transporter activity; GO:0016036,cellular response to phosphate starvation; GO:0006817,phosphate ion transport; GO:0003674,molecular_function; GO:0005488,binding; GO:0036094,small molecule bind…	EXS family	--	--	--
Cluster-101546.0	49.66	48.45	51.06	21.21	20.64	21.63	4101	3459	4099	1476	1535	1507	-1.27964	6.43662e-234	4.20553e-231	down	3684	K10999 cellulose synthase A [EC:2.4.1.12] | (RefSeq) cellulose synthase A catalytic subunit 4 [UDP-forming]-like (A)	--	cellulose synthase A catalytic subunit 4 [UDP-forming]	CESA4_ORYSI RecName: Full=Cellulose synthase A catalytic subunit 4 [UDP-forming]; EC=2.4.1.12; AltName: Full=OsCesA4;	A0A077S3M9_WHEAT SubName: Full=Uncharacterized protein {ECO:0000313|EMBL:CDM84183.1, ECO:0000313|EnsemblPlants:TraesCS3B02G324500.2};	--	GO:0016021,integral component of membrane; GO:0005886,plasma membrane; GO:0016760,cellulose synthase (UDP-forming) activity; GO:0046872,metal ion binding; GO:0071555,cell wall organization; GO:0030244,cellulose biosynthetic process; GO:0042742,defense response to bacterium; GO:0050832,defense response to fungus; GO:0009834,plant-type secondary cell wall biogenesis; GO:0006970,response to osmotic …	Cellulose synthase	--	--	--
Cluster-119442.3	54.33	54.38	57.57	139.18	136.27	135.82	1590	1377	1638	3428	3596	3344	1.25798	4.64651e-230	2.93798e-227	up	1478	K00306 sarcosine oxidase / L-pipecolate oxidase [EC:1.5.3.1 1.5.3.7] | (RefSeq) probable sarcosine oxidase (A)	ko00260: Glycine, serine and threonine metabolism; ko00310: Lysine degradation; ko01100: Metabolic pathways; ko04146: Peroxisome	probable sarcosine oxidase [Aegilops tauschii subsp. strangulata]	SOX_ARATH RecName: Full=Probable sarcosine oxidase; EC=1.5.3.1;	A0A453L683_AEGTS RecName: Full=DAO domain-containing protein {ECO:0000259|Pfam:PF01266};	FAD-dependent oxidoreductase	GO:0050660,flavin adenine dinucleotide binding; GO:0008115,sarcosine oxidase activity; GO:0000166,nucleotide binding; GO:0003674,molecular_function; GO:0005488,binding; GO:0036094,small molecule binding; GO:0043167,ion binding; GO:0043168,anion binding; GO:0097159,organic cyclic compound binding; GO:1901265,nucleoside phosphate binding; GO:1901363,heterocyclic compound binding; GO:0003824,catalyt…	FAD dependent oxidoreductase	--	--	--
Cluster-87150.0	131.39	132.28	128.95	64.82	62.68	61.45	4754	4148	4550	1983	2054	1870	-1.10098	7.97515e-227	4.96263e-224	down	2310	K24917 amino acid permease | (RefSeq) amino acid permease 6-like (A)	--	amino acid permease 6-like [Triticum aestivum]	AAP6_ARATH RecName: Full=Amino acid permease 6; AltName: Full=Amino acid transporter AAP6;	A0A077RHI9_WHEAT SubName: Full=(bread wheat) hypothetical protein {ECO:0000313|EMBL:CDJ26456.1};	Amino acid transporters	GO:0016021,integral component of membrane; GO:0016020,membrane; GO:0005886,plasma membrane; GO:0015172,acidic amino acid transmembrane transporter activity; GO:0015171,amino acid transmembrane transporter activity; GO:0015175,neutral amino acid transmembrane transporter activity; GO:0015293,symporter activity; GO:0015800,acidic amino acid transport; GO:0003333,amino acid transmembrane transport; …	Transmembrane amino acid transporter protein	--	--	--
Cluster-60461.0	64.36	63.39	65.15	15.56	17.06	16.64	1964	1688	1976	395	477	426	-2.02992	1.47782e-226	9.12349e-224	down	1709	K22395 cinnamyl-alcohol dehydrogenase [EC:1.1.1.195] | (RefSeq) berberine bridge enzyme-like 13 isoform X1 (A)	ko00940: Phenylpropanoid biosynthesis; ko01100: Metabolic pathways; ko01110: Biosynthesis of secondary metabolites	berberine bridge enzyme-like Cyn d 4 [Hordeum vulgare subsp. vulgare]	CYND4_CYNDA RecName: Full=Berberine bridge enzyme-like Cyn d 4 {ECO:0000305}; AltName: Full=60 kDa pollen antigen {ECO:0000303|PubMed:8828524, ECO:0000303|PubMed:8900140}; Short=BG60 {ECO:0000303|PubMed:20080962, ECO:0000303|PubMed:8828524, ECO:0000303|PubMed:8900140}; AltName: Full=Cyn d BG60 {ECO:0000303|PubMed:20080962}; AltName: Full=FAD-linked oxidoreductase BG60 {ECO:0000312|EMBL:AAS02108.1…	F2DSN8_HORVV SubName: Full=Predicted protein {ECO:0000313|EMBL:BAJ98109.1};	--	GO:0071949,FAD binding; GO:0016491,oxidoreductase activity; GO:0000166,nucleotide binding; GO:0003674,molecular_function; GO:0005488,binding; GO:0036094,small molecule binding; GO:0043167,ion binding; GO:0043168,anion binding; GO:0050660,flavin adenine dinucleotide binding; GO:0097159,organic cyclic compound binding; GO:1901265,nucleoside phosphate binding; GO:1901363,heterocyclic compound bindin…	FAD binding domain	--	--	--
Cluster-111092.5	59.11	54.93	57.97	304.42	305.59	269.33	537	433	512	2317	2516	2045	2.30119	7.80811e-222	4.63784e-219	up	697	--	--	--	--	--	--	--	--	--	--	--
Cluster-101924.18	132.99	122.69	126.44	25.88	21.25	25.11	2487	2011	2278	353	324	397	-2.56667	8.89275e-221	5.20326e-218	down	1069	K23232 8-hydroxygeraniol dehydrogenase [EC:1.1.1.324] | (RefSeq) probable mannitol dehydrogenase (A)	ko00902: Monoterpenoid biosynthesis; ko01100: Metabolic pathways; ko01110: Biosynthesis of secondary metabolites	alcohol dehydrogenase 1-like [Quercus suber]	MTDH_FRAAN RecName: Full=Probable mannitol dehydrogenase; EC=1.1.1.255; AltName: Full=NAD-dependent mannitol dehydrogenase;	A0A0D6QT63_ARACU RecName: Full=PKS_ER domain-containing protein {ECO:0000259|SMART:SM00829};	Alcohol dehydrogenase, class V	GO:0046029,mannitol dehydrogenase activity; GO:0008270,zinc ion binding; GO:0071704,organic substance metabolic process; GO:0003674,molecular_function; GO:0003824,catalytic activity; GO:0016491,oxidoreductase activity; GO:0016614,oxidoreductase activity, acting on CH-OH group of donors; GO:0016616,oxidoreductase activity, acting on the CH-OH group of donors, NAD or NADP as acceptor; GO:0031320,he…	Alcohol dehydrogenase GroES-like domain	--	--	--
Cluster-90249.0	51.37	48.09	52.88	146.17	152.38	145.16	1140	934	1130	2737	3057	2693	1.49242	3.92674e-220	2.28056e-217	up	1415	K13448 calcium-binding protein CML | (RefSeq) probable calcium-binding protein CML15 (A)	ko04626: Plant-pathogen interaction	probable calcium-binding protein CML15 [Triticum dicoccoides]	CML15_ORYSJ RecName: Full=Probable calcium-binding protein CML15; AltName: Full=Calmodulin-like protein 15;	A0A452YZU9_AEGTS SubName: Full=Uncharacterized protein {ECO:0000313|EnsemblPlants:AET1Gv20584900.1};	Calmodulin and related proteins (EF-Hand superfamily)	GO:0005509,calcium ion binding; GO:0003674,molecular_function; GO:0005488,binding; GO:0043167,ion binding; GO:0043169,cation binding; GO:0046872,metal ion binding	EF hand	--	--	--
Cluster-108267.0	9.38	11.73	12.56	142.02	151.28	125.08	125	135	165	1649	1890	1453	3.63606	5.10472e-215	2.90026e-212	up	866	--	--	--	--	--	--	--	Hydrophobic surface binding protein A	--	--	--
Cluster-54460.2	36.44	36.26	35.38	14.57	13.91	13.4	2940	2504	2745	962	1009	905	-1.42296	4.28966e-212	2.40236e-209	down	3740	K17302 coatomer subunit beta' | (RefSeq) uncharacterized protein LOC123156650 isoform X1 (A)	--	unnamed protein product [Triticum turgidum subsp. durum]	CRK10_ARATH RecName: Full=Cysteine-rich receptor-like protein kinase 10; Short=Cysteine-rich RLK10; EC=2.7.11.-; AltName: Full=Receptor-like protein kinase 4; Flags: Precursor;	A0A446XYV9_TRITD SubName: Full=Uncharacterized protein {ECO:0000313|EMBL:VAI81560.1};	--	GO:0005829,cytosol; GO:0016021,integral component of membrane; GO:0005886,plasma membrane; GO:0005524,ATP binding; GO:0106310,protein serine kinase activity; GO:0004674,protein serine/threonine kinase activity; GO:0042742,defense response to bacterium; GO:0006468,protein phosphorylation; GO:0000166,nucleotide binding; GO:0003674,molecular_function; GO:0005488,binding; GO:0017076,purine nucleotide…	Protein kinase domain	--	--	--
Cluster-129009.16	90.27	100.42	92.56	392.27	406.36	476.79	461	421	470	1657	1796	1819	2.04973	1.14379e-209	6.27125e-207	up	598	K13993 HSP20 family protein | (RefSeq) 16.9 kDa class I heat shock protein 1-like (A)	ko04141: Protein processing in endoplasmic reticulum	16.9 kDa class I heat shock protein 1 [Hordeum vulgare subsp. vulgare]	HS16A_WHEAT RecName: Full=16.9 kDa class I heat shock protein 1; AltName: Full=HSP 16.9; AltName: Full=Heat shock protein 16.9A; AltName: Full=Heat shock protein 17; AltName: Full=Low molecular weight heat shock protein;	A0A453DUG7_AEGTS RecName: Full=SHSP domain-containing protein {ECO:0000259|PROSITE:PS01031};	Molecular chaperone (small heat-shock protein Hsp26/Hsp42)	GO:0005737,cytoplasm; GO:0043621,protein self-association; GO:0051082,unfolded protein binding; GO:0051259,protein complex oligomerization; GO:0006457,protein folding; GO:0009408,response to heat; GO:0042542,response to hydrogen peroxide; GO:0009651,response to salt stress; GO:0003674,molecular_function; GO:0005488,binding; GO:0005515,protein binding; GO:0008150,biological_process; GO:0009987,cel…	Hsp20/alpha crystallin family	--	--	--
Cluster-126757.1	147.56	153.82	130.64	28.26	30.05	30.51	2711	2447	2332	436	498	470	-2.33209	1.27328e-208	6.88492e-206	down	1045	K01674 carbonic anhydrase [EC:4.2.1.1] | (RefSeq) alpha carbonic anhydrase 7-like (A)	ko00910: Nitrogen metabolism; ko01100: Metabolic pathways	dio2 [Dioscorea alata]	DB3L_DIOPO RecName: Full=Dioscorin DB3L {ECO:0000305}; AltName: Full=Tuber storage protein DB3L {ECO:0000305}; Flags: Precursor;	A0A1P8PPP9_DIOAL SubName: Full=Dio2 {ECO:0000313|EMBL:APX64495.1};	Carbonic anhydrase	GO:0048030,disaccharide binding; GO:1901982,maltose binding; GO:0042803,protein homodimerization activity; GO:0008270,zinc ion binding; GO:0003674,molecular_function; GO:0005488,binding; GO:0030246,carbohydrate binding; GO:0070492,oligosaccharide binding; GO:0005515,protein binding; GO:0042802,identical protein binding; GO:0046983,protein dimerization activity; GO:0043167,ion binding; GO:0043169,…	Eukaryotic-type carbonic anhydrase	--	--	--
Cluster-313.7	503.43	454.52	500.88	171.86	138.31	157.77	2532	2217	2530	814	861	840	-1.44639	3.52429e-208	1.89262e-205	down	817	K07151 dolichyl-diphosphooligosaccharide---protein glycosyltransferase [EC:2.4.99.18] | (RefSeq) dolichyl-diphosphooligosaccharide--protein glycosyltransferase subunit STT3B-like isoform X1 (A)	ko00510: N-Glycan biosynthesis; ko00513: Various types of N-glycan biosynthesis; ko01100: Metabolic pathways; ko04141: Protein processing in endoplasmic reticulum	cortical cell-delineating protein-like [Triticum dicoccoides]	CCDP_MAIZE RecName: Full=Cortical cell-delineating protein; AltName: Full=Root-specific protein ZRP3; Flags: Precursor;	A0A453T0P0_AEGTS RecName: Full=AAI domain-containing protein {ECO:0000259|SMART:SM00499};	--	--	Hydrophobic seed protein	--	--	--
Cluster-19158.0	0.48	0.43	0.37	137.29	139.28	125.2	12	9	9	2877	3149	2649	8.26135	8.77376e-207	4.67964e-204	up	1318	K22745 apoptosis-inducing factor 2 | (RefSeq) ferroptosis suppressor protein 1-like (A)	--	apoptosis-inducing factor 2-like [Spinacia oleracea]	--	K3WRA6_GLOUD RecName: Full=Pyr_redox_2 domain-containing protein {ECO:0000259|Pfam:PF07992};	Monodehydroascorbate/ferredoxin reductase	GO:0016491,oxidoreductase activity; GO:0003674,molecular_function; GO:0003824,catalytic activity	Pyridine nucleotide-disulphide oxidoreductase	--	--	--
Cluster-104008.18	189.77	202.47	186.6	58.68	61.41	62.78	2524	2332	2409	654	736	697	-1.71537	3.82949e-205	2.01511e-202	down	839	K05953 nicotianamine synthase [EC:2.5.1.43] | (RefSeq) probable nicotianamine synthase 4 (A)	ko00270: Cysteine and methionine metabolism; ko00999: Biosynthesis of various plant secondary metabolites; ko01100: Metabolic pathways; ko01110: Biosynthesis of secondary metabolites	probable nicotianamine synthase 4 [Triticum dicoccoides]	NAS2_HORVU RecName: Full=Probable nicotianamine synthase 2; EC=2.5.1.43; AltName: Full=HvNAS2; AltName: Full=S-adenosyl-L-methionine:S-adenosyl-L-methionine:S-adenosyl-methionine 3-amino-3-carboxypropyltransferase 2;	A0A3B6NJN6_WHEAT RecName: Full=Nicotianamine synthase {ECO:0000256|RuleBase:RU368095}; EC=2.5.1.43 {ECO:0000256|RuleBase:RU368095};	--	GO:0030410,nicotianamine synthase activity; GO:0030418,nicotianamine biosynthetic process; GO:0003674,molecular_function; GO:0003824,catalytic activity; GO:0016740,transferase activity; GO:0016765,transferase activity, transferring alkyl or aryl (other than methyl) groups; GO:0006082,organic acid metabolic process; GO:0006576,cellular biogenic amine metabolic process; GO:0006807,nitrogen compound…	Nicotianamine synthase protein	--	--	--
Cluster-101446.0	36.8	39.56	37.39	2.87	3.66	3.71	1109	1032	1095	72	99	94	-3.52636	4.35799e-204	2.27792e-201	down	1513	K00851 gluconokinase [EC:2.7.1.12] | (RefSeq) probable gluconokinase (A)	ko00030: Pentose phosphate pathway; ko01100: Metabolic pathways; ko01110: Biosynthesis of secondary metabolites; ko01200: Carbon metabolism	hypothetical protein FH972_022270 [Carpinus fangiana]	GNTK_ARATH RecName: Full=Gluconokinase {ECO:0000303|PubMed:12447540}; EC=2.7.1.12 {ECO:0000250|UniProtKB:Q5FQ97}; AltName: Full=Gluconate kinase {ECO:0000303|PubMed:12447540};	A0A5N6KS44_9ROSI RecName: Full=Gluconokinase {ECO:0000256|ARBA:ARBA00012054, ECO:0000256|RuleBase:RU363066}; EC=2.7.1.12 {ECO:0000256|ARBA:ARBA00012054, ECO:0000256|RuleBase:RU363066};	Gluconate kinase	GO:0005524,ATP binding; GO:0046316,gluconokinase activity; GO:0016787,hydrolase activity; GO:0046177,D-gluconate catabolic process; GO:0016310,phosphorylation; GO:0000166,nucleotide binding; GO:0003674,molecular_function; GO:0005488,binding; GO:0017076,purine nucleotide binding; GO:0030554,adenyl nucleotide binding; GO:0032553,ribonucleotide binding; GO:0032555,purine ribonucleotide binding; GO:0…	Shikimate kinase	--	--	--
Cluster-120202.5	68.39	69.29	74.38	1.59	0.9	0.79	1434	1258	1515	28	17	14	-6.06847	4.51657e-201	2.34518e-198	down	1147	K15919 glyoxylate/hydroxypyruvate reductase [EC:1.1.1.79 1.1.1.81] | (RefSeq) glyoxylate/hydroxypyruvate reductase HPR3-like (A)	ko00260: Glycine, serine and threonine metabolism; ko00630: Glyoxylate and dicarboxylate metabolism; ko01100: Metabolic pathways; ko01110: Biosynthesis of secondary metabolites; ko01200: Carbon metabolism	hypothetical protein BT93_L4536 [Corymbia citriodora subsp. variegata]	HPR3_ARATH RecName: Full=Glyoxylate/hydroxypyruvate reductase HPR3; EC=1.1.1.79 {ECO:0000305|PubMed:21205613}; EC=1.1.1.81 {ECO:0000305|PubMed:21205613}; AltName: Full=NAD(P)H-dependent hydroxypyruvate reductase 3; Short=AtHPR3; Short=HPR 3;	A0A565APY8_9BRAS SubName: Full=Uncharacterized protein {ECO:0000313|EMBL:VVA91109.1};	Glyoxylate/hydroxypyruvate reductase (D-isomer-specific 2-hydroxy acid dehydrogenase superfamily)	GO:0030267,glyoxylate reductase (NADP+) activity; GO:0016618,hydroxypyruvate reductase activity; GO:0051287,NAD binding; GO:0009854,oxidative photosynthetic carbon pathway; GO:0009853,photorespiration; GO:0003674,molecular_function; GO:0003824,catalytic activity; GO:0016491,oxidoreductase activity; GO:0016614,oxidoreductase activity, acting on CH-OH group of donors; GO:0016616,oxidoreductase acti…	D-isomer specific 2-hydroxyacid dehydrogenase, NAD binding domain	--	--	--
Cluster-116080.12	117.4	136.23	152.18	24.46	6.22	12.4	1505	1270	1487	254	228	254	-2.44479	4.98076e-201	2.56919e-198	down	2007	K03444 MFS transporter, SP family, ERD6-like sugar transporter | (RefSeq) sugar transporter ERD6-like 5 (A)	--	general alpha-glucoside permease-like [Quercus suber]	PLST4_ARATH RecName: Full=Plastidic glucose transporter 4; Short=AtpGlcT;	A0A0D6QRE2_ARACU RecName: Full=MFS domain-containing protein {ECO:0000259|PROSITE:PS50850};	Predicted transporter (major facilitator superfamily)	GO:0009941,chloroplast envelope; GO:0009706,chloroplast inner membrane; GO:0016021,integral component of membrane; GO:0016020,membrane; GO:0009536,plastid; GO:0005351,carbohydrate:proton symporter activity; GO:0008643,carbohydrate transport; GO:0003674,molecular_function; GO:0005215,transporter activity; GO:0005402,carbohydrate:cation symporter activity; GO:0008324,cation transmembrane transporte…	Sugar (and other) transporter	--	--	--
Cluster-86237.1	2.9	3.99	3.82	72.61	81.61	81.72	32	32	36	895	1050	938	4.9345	3.35532e-200	1.70827e-197	up	1238	--	--	hypothetical protein TRIUR3_33230 [Triticum urartu]	--	M7YM28_TRIUA SubName: Full=Uncharacterized protein {ECO:0000313|EMBL:EMS48392.1, ECO:0000313|EnsemblPlants:TRIUR3_33230-P1};	--	--	--	--	--	--
Cluster-80787.3	10.55	12.36	12.39	102.68	96.27	90.13	160	162	182	1307	1317	1144	2.98735	9.55294e-200	4.83225e-197	up	914	--	--	hypothetical protein FVEG_07535 [Fusarium verticillioides 7600]	--	B4G0J0_MAIZE RecName: Full=CFEM domain-containing protein {ECO:0000259|SMART:SM00747};	--	--	CFEM domain	--	--	--
Cluster-74503.4	6.6	6.17	7.7	49.8	47.95	43.01	243	204	279	1586	1626	1394	2.75338	1.05861e-198	5.32055e-196	up	2317	--	--	hypothetical protein FH972_020954 [Carpinus fangiana]	--	A0A5N6KNB4_9ROSI SubName: Full=Uncharacterized protein {ECO:0000313|EMBL:KAB8336643.1};	Transcriptional regulator	GO:0006355,regulation of DNA-templated transcription; GO:0006139,nucleobase-containing compound metabolic process; GO:0006351,DNA-templated transcription; GO:0006725,cellular aromatic compound metabolic process; GO:0006807,nitrogen compound metabolic process; GO:0008150,biological_process; GO:0008152,metabolic process; GO:0009058,biosynthetic process; GO:0009059,macromolecule biosynthetic process…	HCNGP-like protein	--	--	--
Cluster-86056.0	166.02	162.4	156.6	82.27	79.74	82.82	5456	4618	5003	2275	2362	2291	-1.03465	5.54686e-197	2.75254e-194	down	1701	K01051 pectinesterase [EC:3.1.1.11] | (RefSeq) pectinesterase-like (A)	ko00040: Pentose and glucuronate interconversions; ko01100: Metabolic pathways	putative pectinesterase/pectinesterase inhibitor 41 [Hordeum vulgare]	PME41_ARATH RecName: Full=Probable pectinesterase/pectinesterase inhibitor 41; Includes: RecName: Full=Pectinesterase inhibitor 41; AltName: Full=Pectin methylesterase inhibitor 41; Includes: RecName: Full=Pectinesterase 41; Short=PE 41; EC=3.1.1.11; AltName: Full=AtPMEpcrB; AltName: Full=Pectin methylesterase 41; Short=AtPME41; Flags: Precursor;	A0A452YY17_AEGTS RecName: Full=PMEI domain-containing protein {ECO:0000259|SMART:SM00856};	--	GO:0005576,extracellular region; GO:0045330,aspartyl esterase activity; GO:0030599,pectinesterase activity; GO:0046910,pectinesterase inhibitor activity; GO:0042545,cell wall modification; GO:0050832,defense response to fungus; GO:0045490,pectin catabolic process; GO:0009741,response to brassinosteroid; GO:0009409,response to cold; GO:0009620,response to fungus; GO:0003674,molecular_function; GO:…	Pectinesterase	--	--	--
Cluster-83453.12	1428.33	1413.21	1395.92	426.8	378.99	412.46	1789	1549	1685	440	432	405	-1.88903	1.03127e-194	5.02217e-192	down	335	K00430 peroxidase [EC:1.11.1.7] | (RefSeq) peroxidase-like (A)	ko00940: Phenylpropanoid biosynthesis; ko01100: Metabolic pathways; ko01110: Biosynthesis of secondary metabolites	unnamed protein product [Triticum turgidum subsp. durum]	PER1_WHEAT RecName: Full=Peroxidase; EC=1.11.1.7; AltName: Full=WP2; Flags: Precursor;	A0A446LXK4_TRITD RecName: Full=PEROXIDASE_4 domain-containing protein {ECO:0000259|PROSITE:PS50873};	--	GO:0005576,extracellular region; GO:0020037,heme binding; GO:0046872,metal ion binding; GO:0004601,peroxidase activity; GO:0042744,hydrogen peroxide catabolic process; GO:0006979,response to oxidative stress; GO:0003674,molecular_function; GO:0005488,binding; GO:0046906,tetrapyrrole binding; GO:0097159,organic cyclic compound binding; GO:1901363,heterocyclic compound binding; GO:0043167,ion bindi…	--	--	--	--
Cluster-104008.31	256.49	245.31	261.32	78.74	70.12	65.58	3485	2849	3411	899	861	746	-1.87014	1.71323e-194	8.29171e-192	down	852	K05953 nicotianamine synthase [EC:2.5.1.43] | (RefSeq) probable nicotianamine synthase 4 (A)	ko00270: Cysteine and methionine metabolism; ko00999: Biosynthesis of various plant secondary metabolites; ko01100: Metabolic pathways; ko01110: Biosynthesis of secondary metabolites	probable nicotianamine synthase 4 [Triticum dicoccoides]	NAS4_HORVU RecName: Full=Probable nicotianamine synthase 4; EC=2.5.1.43; AltName: Full=HvNAS4; AltName: Full=S-adenosyl-L-methionine:S-adenosyl-L-methionine:S-adenosyl-methionine 3-amino-3-carboxypropyltransferase 4;	A0A453NKC3_AEGTS RecName: Full=Nicotianamine synthase {ECO:0000256|RuleBase:RU368095}; EC=2.5.1.43 {ECO:0000256|RuleBase:RU368095};	--	GO:0030410,nicotianamine synthase activity; GO:0030418,nicotianamine biosynthetic process; GO:0003674,molecular_function; GO:0003824,catalytic activity; GO:0016740,transferase activity; GO:0016765,transferase activity, transferring alkyl or aryl (other than methyl) groups; GO:0006082,organic acid metabolic process; GO:0006576,cellular biogenic amine metabolic process; GO:0006807,nitrogen compound…	Nicotianamine synthase protein	--	--	--
Cluster-115563.4	7.67	9.46	8.37	97.65	92.85	85.53	111	122	114	1174	1204	1019	3.37436	1.49563e-192	7.10694e-190	up	976	--	--	--	--	--	--	--	--	--	--	--
Cluster-115563.1	4.66	3.25	3.49	68.19	75.33	68.44	74	44	54	899	1064	898	4.14337	2.688e-191	1.26199e-188	up	983	--	--	--	--	--	--	--	Divergent InlB B-repeat domain	--	--	--
Cluster-103668.2	315.7	309.99	295.27	110.86	112.08	111.37	2490	2121	2260	727	793	727	-1.52622	6.41255e-188	2.99271e-185	down	623	--	--	hypothetical protein CFC21_059162 [Triticum aestivum]	--	A0A453J1N4_AEGTS SubName: Full=Uncharacterized protein {ECO:0000313|EnsemblPlants:AET4Gv20760200.2};	--	--	--	--	--	--
Cluster-77277.11	43.34	46.12	44.22	290.67	264.37	287.45	190	173	185	1078	1066	1028	2.62008	2.74857e-187	1.27516e-184	up	622	--	--	unnamed protein product [Triticum turgidum subsp. durum]	DHN3_HORVU RecName: Full=Dehydrin DHN3; AltName: Full=B17;	A0A446VRQ0_TRITD SubName: Full=Uncharacterized protein {ECO:0000313|EMBL:VAI50516.1};	--	GO:0009415,response to water; GO:0001101,response to acid chemical; GO:0008150,biological_process; GO:0009628,response to abiotic stimulus; GO:0010035,response to inorganic substance; GO:0042221,response to chemical; GO:0050896,response to stimulus; GO:1901700,response to oxygen-containing compound	--	--	--	--
Cluster-127765.2	29.06	27.71	29.4	117.83	124.34	124.35	371	306	364	1261	1432	1326	2.03571	1.06616e-185	4.86003e-183	up	818	K19222 1,4-dihydroxy-2-naphthoyl-CoA hydrolase [EC:3.1.2.28] | (RefSeq) 1,4-dihydroxy-2-naphthoyl-CoA thioesterase 1-like (A)	ko00130: Ubiquinone and other terpenoid-quinone biosynthesis; ko01100: Metabolic pathways; ko01110: Biosynthesis of secondary metabolites; ko01240: Biosynthesis of cofactors	1,4-dihydroxy-2-naphthoyl-CoA thioesterase 1-like [Triticum aestivum]	DNAT1_ARATH RecName: Full=1,4-dihydroxy-2-naphthoyl-CoA thioesterase 1 {ECO:0000303|PubMed:22372525}; Short=AtDHNAT1 {ECO:0000303|PubMed:22372525}; Short=DHNA-CoA thioesterase 1 {ECO:0000303|PubMed:22372525}; EC=3.1.2.- {ECO:0000305};	A0A446SLB0_TRITD RecName: Full=4HBT domain-containing protein {ECO:0000259|Pfam:PF03061};	HGG motif-containing thioesterase	GO:0005777,peroxisome; GO:0061522,1,4-dihydroxy-2-naphthoyl-CoA thioesterase activity; GO:0042372,phylloquinone biosynthetic process; GO:0051289,protein homotetramerization; GO:0003674,molecular_function; GO:0003824,catalytic activity; GO:0016289,CoA hydrolase activity; GO:0016787,hydrolase activity; GO:0016788,hydrolase activity, acting on ester bonds; GO:0016790,thiolester hydrolase activity; G…	Thioesterase superfamily	--	--	--
Cluster-109772.0	27.84	28.23	28.04	62.74	61.93	61.95	1463	1284	1462	2831	3004	2790	1.12163	1.50679e-185	6.82888e-183	up	3375	K18674 N-acetylgalactosamine kinase [EC:2.7.1.157] | (RefSeq) galactokinase-like (A)	ko00520: Amino sugar and nucleotide sugar metabolism; ko01100: Metabolic pathways; ko01250: Biosynthesis of nucleotide sugars	galactokinase isoform X2 [Triticum urartu]	GALK1_ARATH RecName: Full=Galactokinase; EC=2.7.1.6; AltName: Full=Galactose kinase;	T1MF37_TRIUA SubName: Full=Uncharacterized protein {ECO:0000313|EnsemblPlants:TRIUR3_16307-P1};	Galactokinase	GO:0005829,cytosol; GO:0005524,ATP binding; GO:0004335,galactokinase activity; GO:0046872,metal ion binding; GO:0046835,carbohydrate phosphorylation; GO:0006012,galactose metabolic process; GO:0000166,nucleotide binding; GO:0003674,molecular_function; GO:0005488,binding; GO:0017076,purine nucleotide binding; GO:0030554,adenyl nucleotide binding; GO:0032553,ribonucleotide binding; GO:0032555,purin…	Galactokinase galactose-binding signature	--	--	--
Cluster-79234.9	14.79	13.41	14.96	48.96	50.35	49.58	592	464	582	1650	1816	1671	1.73702	4.48772e-185	2.02218e-182	up	1908	K04079 molecular chaperone HtpG | (RefSeq) heat shock protein 90-1 (A)	ko04141: Protein processing in endoplasmic reticulum; ko04626: Plant-pathogen interaction	heat shock protein 90 [Triticum dicoccoides]	HS901_ARATH RecName: Full=Heat shock protein 90-1 {ECO:0000305}; Short=AtHSP90.1 {ECO:0000305}; Short=AtHsp90-1 {ECO:0000303|PubMed:11599565}; AltName: Full=Heat shock protein 81-1 {ECO:0000305}; Short=Hsp81-1 {ECO:0000303|PubMed:11599565}; AltName: Full=Heat shock protein 83;	F4Y5B3_TRIDC SubName: Full=Heat shock protein 90 {ECO:0000313|EMBL:ADF31778.1};	Molecular chaperone (HSP90 family)	GO:0005829,cytosol; GO:0048471,perinuclear region of cytoplasm; GO:0005886,plasma membrane; GO:0032991,protein-containing complex; GO:0005524,ATP binding; GO:0016887,ATP hydrolysis activity; GO:0051082,unfolded protein binding; GO:0034605,cellular response to heat; GO:0061077,chaperone-mediated protein folding; GO:0042742,defense response to bacterium; GO:0045087,innate immune response; GO:000645…	Hsp90 protein	--	--	--
Cluster-133819.1	57.13	58.83	57.59	15.39	15.03	13.14	1682	1499	1648	381	399	325	-2.04232	6.06405e-185	2.71687e-182	down	1485	K12818 ATP-dependent RNA helicase DHX8/PRP22 [EC:3.6.4.13] | (RefSeq) hypothetical protein (A)	ko03040: Spliceosome	protein ZINC INDUCED FACILITATOR-LIKE 1-like isoform X2 [Hordeum vulgare subsp. vulgare]	ZIFL1_ARATH RecName: Full=Protein ZINC INDUCED FACILITATOR-LIKE 1; AltName: Full=Protein ZIF-LIKE 1;	G9MBF1_HORVU SubName: Full=DMA efflux transporter {ECO:0000313|EMBL:BAL15698.1};	Permease of the major facilitator superfamily	GO:0016021,integral component of membrane; GO:0009705,plant-type vacuole membrane; GO:0005886,plasma membrane; GO:0022821,solute:potassium antiporter activity; GO:0010540,basipetal auxin transport; GO:0009630,gravitropism; GO:0090333,regulation of stomatal closure; GO:0009414,response to water deprivation; GO:0048364,root development; GO:0003674,molecular_function; GO:0005215,transporter activity…	Major Facilitator Superfamily	--	--	--
Cluster-132589.2	310.28	305.37	314.25	124.38	117.91	135.45	3584	3067	3550	1224	1249	1317	-1.34026	2.94304e-184	1.31107e-181	down	783	K19891 glucan endo-1,3-beta-glucosidase 1/2/3 [EC:3.2.1.39] | (RefSeq) glucan endo-1,3-beta-glucosidase 2-like (A)	ko00500: Starch and sucrose metabolism; ko01100: Metabolic pathways	glucan endo-1,3-beta-glucosidase 13-like [Triticum dicoccoides]	E137_ARATH RecName: Full=Glucan endo-1,3-beta-glucosidase 7; EC=3.2.1.39; AltName: Full=(1->3)-beta-glucan endohydrolase 7; Short=(1->3)-beta-glucanase 7; AltName: Full=Beta-1,3-endoglucanase 7; Short=Beta-1,3-glucanase 7; Flags: Precursor;	A0A453A1B4_AEGTS RecName: Full=X8 domain-containing protein {ECO:0000259|SMART:SM00768};	--	GO:0046658,anchored component of plasma membrane; GO:0005576,extracellular region; GO:0042973,glucan endo-1,3-beta-D-glucosidase activity; GO:0005975,carbohydrate metabolic process; GO:0071555,cell wall organization; GO:0003674,molecular_function; GO:0003824,catalytic activity; GO:0004553,hydrolase activity, hydrolyzing O-glycosyl compounds; GO:0008422,beta-glucosidase activity; GO:0015926,glucos…	Glycosyl hydrolases family 17	--	--	--
Cluster-86391.0	174.9	162.41	165.36	348.48	356.15	356.66	2440	1962	2240	4076	4481	4160	1.0247	3.60655e-183	1.59758e-180	up	865	--	--	unnamed protein product [Triticum aestivum]	FLZ1_ARATH RecName: Full=FCS-Like Zinc finger 1 {ECO:0000303|PubMed:24901469};	A0A453CXP6_AEGTS RecName: Full=FLZ-type domain-containing protein {ECO:0000259|PROSITE:PS51795};	--	GO:0005737,cytoplasm; GO:0005634,nucleus; GO:0019900,kinase binding; GO:0046872,metal ion binding; GO:0019902,phosphatase binding; GO:0071456,cellular response to hypoxia; GO:0009749,response to glucose; GO:1905582,response to mannose; GO:0042594,response to starvation; GO:0009744,response to sucrose; GO:0003674,molecular_function; GO:0005488,binding; GO:0005515,protein binding; GO:0019899,enzyme…	zinc-finger of the FCS-type, C2-C2	--	--	--
Cluster-126712.3	1.97	2.15	1.93	46.69	50.33	44.54	45	35	40	942	1078	843	4.66146	3.99616e-183	1.76022e-180	up	1482	--	--	--	--	--	--	--	TonB polyproline region	--	--	--
Cluster-131588.0	3.09	4.03	1.89	75.02	81.42	76.09	45	51	26	920	1073	930	4.66407	7.0745e-183	3.09875e-180	up	892	K03809 NAD(P)H dehydrogenase (quinone) [EC:1.6.5.2] | (RefSeq) probable 1,4-benzoquinone reductase (A)	ko00130: Ubiquinone and other terpenoid-quinone biosynthesis; ko01100: Metabolic pathways; ko01110: Biosynthesis of secondary metabolites; ko01240: Biosynthesis of cofactors	hypothetical protein BT93_L5914 [Corymbia citriodora subsp. variegata]	QR2_TRIVS RecName: Full=Quinone-oxidoreductase QR2 {ECO:0000303|PubMed:11260494}; Short=TvQR2 {ECO:0000303|PubMed:11260494}; EC=1.6.5.2 {ECO:0000269|Ref.2};	M1UVW4_CYAM1 SubName: Full=Probable 1,4-benzoquinone reductase {ECO:0000313|EMBL:BAM82206.1};	1,4-benzoquinone reductase-like; Trp repressor binding protein-like/protoplast-secreted protein	GO:0010181,FMN binding; GO:0050136,NADH dehydrogenase (quinone) activity; GO:0008753,NADPH dehydrogenase (quinone) activity; GO:0000166,nucleotide binding; GO:0003674,molecular_function; GO:0005488,binding; GO:0032553,ribonucleotide binding; GO:0036094,small molecule binding; GO:0043167,ion binding; GO:0043168,anion binding; GO:0097159,organic cyclic compound binding; GO:0097367,carbohydrate deri…	NADPH-dependent FMN reductase	--	--	--
Cluster-132567.2	67.76	70.51	66.42	29.34	29.2	29.84	3041	2737	2898	1109	1181	1128	-1.25839	2.00738e-181	8.64771e-179	down	2102	K19891 glucan endo-1,3-beta-glucosidase 1/2/3 [EC:3.2.1.39] | (RefSeq) hypothetical protein (A)	ko00500: Starch and sucrose metabolism; ko01100: Metabolic pathways	glucan endo-1,3-beta-glucosidase 13-like [Triticum dicoccoides]	E133_ARATH RecName: Full=Glucan endo-1,3-beta-glucosidase 3; EC=3.2.1.39; AltName: Full=(1->3)-beta-glucan endohydrolase 3; Short=(1->3)-beta-glucanase 3; AltName: Full=Beta-1,3-endoglucanase 3; Short=Beta-1,3-glucanase 3; Flags: Precursor;	A0A3B5Y6Y9_WHEAT SubName: Full=Uncharacterized protein {ECO:0000313|EnsemblPlants:TraesCS1A02G422900.1};	--	GO:0031225,anchored component of membrane; GO:0046658,anchored component of plasma membrane; GO:0005739,mitochondrion; GO:0005886,plasma membrane; GO:0042973,glucan endo-1,3-beta-D-glucosidase activity; GO:0005975,carbohydrate metabolic process; GO:0006952,defense response; GO:0003674,molecular_function; GO:0003824,catalytic activity; GO:0004553,hydrolase activity, hydrolyzing O-glycosyl compound…	X8 domain	--	--	--
Cluster-140825.0	100.34	111.18	104	250.74	248.29	245.76	1955	1875	1925	4069	4325	3990	1.18967	1.18862e-180	5.09257e-178	up	1087	--	--	germin-like protein 3-7 [Triticum dicoccoides]	GL37_ORYSJ RecName: Full=Germin-like protein 3-7; AltName: Full=Germin-like protein 7; Short=OsGER7; Flags: Precursor;	A0A446TJP7_TRITD RecName: Full=Germin-like protein {ECO:0000256|RuleBase:RU366015};	--	GO:0048046,apoplast; GO:0030145,manganese ion binding; GO:0003674,molecular_function; GO:0005488,binding; GO:0043167,ion binding; GO:0043169,cation binding; GO:0046872,metal ion binding; GO:0046914,transition metal ion binding; GO:0005575,cellular_component; GO:0005576,extracellular region; GO:0110165,cellular anatomical entity	Cupin	--	--	--
Cluster-119388.0	131.81	143.4	146.24	396.42	389.83	407.17	887	837	954	2222	2368	2263	1.44136	3.87847e-177	1.62616e-174	up	576	--	--	--	--	--	--	--	--	--	--	--
Cluster-120136.2	8.61	8.24	10.02	97.3	112.52	114.83	93	77	105	883	1101	1038	3.54439	1.11445e-175	4.6232e-173	up	741	--	--	uncharacterized protein LOC109769545 [Aegilops tauschii subsp. strangulata]	--	A0A3B6JQP9_WHEAT SubName: Full=Uncharacterized protein {ECO:0000313|EnsemblPlants:TraesCS4D02G326100.1.cds1};	--	--	--	--	--	--
Cluster-101924.14	138.3	153.34	150.22	23.67	20.98	30.22	1842	1583	1799	269	251	323	-2.54214	3.16789e-175	1.30726e-172	down	1251	K23232 8-hydroxygeraniol dehydrogenase [EC:1.1.1.324] | (RefSeq) probable mannitol dehydrogenase (A)	ko00902: Monoterpenoid biosynthesis; ko01100: Metabolic pathways; ko01110: Biosynthesis of secondary metabolites	hypothetical protein BT93_L5329 [Corymbia citriodora subsp. variegata]	MTDH_FRAAN RecName: Full=Probable mannitol dehydrogenase; EC=1.1.1.255; AltName: Full=NAD-dependent mannitol dehydrogenase;	A0A0D6QT63_ARACU RecName: Full=PKS_ER domain-containing protein {ECO:0000259|SMART:SM00829};	Alcohol dehydrogenase, class V	GO:0046029,mannitol dehydrogenase activity; GO:0008270,zinc ion binding; GO:0071704,organic substance metabolic process; GO:0003674,molecular_function; GO:0003824,catalytic activity; GO:0016491,oxidoreductase activity; GO:0016614,oxidoreductase activity, acting on CH-OH group of donors; GO:0016616,oxidoreductase activity, acting on the CH-OH group of donors, NAD or NADP as acceptor; GO:0031320,he…	Alcohol dehydrogenase GroES-like domain	--	--	--
Cluster-136382.0	11.66	10.65	11.77	126.18	135.18	134.41	82	65	80	741	860	783	3.47913	3.24265e-173	1.3173e-170	up	589	--	--	--	--	--	--	--	--	--	--	--
Cluster-97801.0	19.78	23.76	22.83	76.5	74.78	74.26	868	902	974	2827	2958	2746	1.71966	1.49966e-172	6.06088e-170	up	2062	K08237 hydroquinone glucosyltransferase [EC:2.4.1.218] | (RefSeq) UDP-glycosyltransferase 72B1-like (A)	--	UDP-glycosyltransferase 72B1 [Aegilops tauschii subsp. strangulata]	U72B1_ARATH RecName: Full=UDP-glycosyltransferase 72B1; EC=2.4.1.-; AltName: Full=Arbutin synthase; AltName: Full=Probable hydroquinone glucosyltransferase; EC=2.4.1.218;	A0A453NB06_AEGTS RecName: Full=Glycosyltransferase {ECO:0000256|RuleBase:RU362057}; EC=2.4.1.- {ECO:0000256|RuleBase:RU362057};	UDP-glucuronosyl and UDP-glucosyl transferase	GO:0050505,hydroquinone glucosyltransferase activity; GO:0035251,UDP-glucosyltransferase activity; GO:0008194,UDP-glycosyltransferase activity; GO:0009809,lignin biosynthetic process; GO:0009636,response to toxic substance; GO:0042178,xenobiotic catabolic process; GO:0006805,xenobiotic metabolic process; GO:0003674,molecular_function; GO:0003824,catalytic activity; GO:0016740,transferase activity…	UDP-glucoronosyl and UDP-glucosyl transferase	--	--	--
Cluster-110197.0	185.77	180.73	188.45	55.77	56.21	50.85	1716	1442	1668	437	481	407	-1.7779	1.72828e-172	6.94903e-170	down	1044	K05894 12-oxophytodienoic acid reductase [EC:1.3.1.42] | (RefSeq) 12-oxophytodienoate reductase 1-like (A)	ko00592: alpha-Linolenic acid metabolism; ko01100: Metabolic pathways; ko01110: Biosynthesis of secondary metabolites	hypothetical protein CFC21_007005, partial [Triticum aestivum]	OPR10_ORYSJ RecName: Full=Putative 12-oxophytodienoate reductase 10; EC=1.3.1.-; AltName: Full=OPDA-reductase 10; Short=OsOPR10;	A0A452YVP2_AEGTS RecName: Full=Oxidored_FMN domain-containing protein {ECO:0000259|Pfam:PF00724};	NADH:flavin oxidoreductase/12-oxophytodienoate reductase	GO:0010181,FMN binding; GO:0016491,oxidoreductase activity; GO:0006633,fatty acid biosynthetic process; GO:0031408,oxylipin biosynthetic process; GO:0000166,nucleotide binding; GO:0003674,molecular_function; GO:0005488,binding; GO:0032553,ribonucleotide binding; GO:0036094,small molecule binding; GO:0043167,ion binding; GO:0043168,anion binding; GO:0097159,organic cyclic compound binding; GO:0097…	NADH:flavin oxidoreductase / NADH oxidase family	--	--	--
Cluster-54258.2	1.08	1.04	2.81	28.87	27.44	25	36	34	57	861	893	786	4.40899	2.40426e-172	9.56882e-170	up	1825	--	--	hypothetical protein FH972_022277 [Carpinus fangiana]	--	A0A6G0WFM5_9STRA RecName: Full=CBM1 domain-containing protein {ECO:0000259|PROSITE:PS51164};	--	GO:0005576,extracellular region; GO:0030248,cellulose binding; GO:0004553,hydrolase activity, hydrolyzing O-glycosyl compounds; GO:0030245,cellulose catabolic process; GO:0003674,molecular_function; GO:0005488,binding; GO:0030246,carbohydrate binding; GO:0030247,polysaccharide binding; GO:0003824,catalytic activity; GO:0016787,hydrolase activity; GO:0016798,hydrolase activity, acting on glycosyl …	Glycosyl hydrolase family 7	--	--	--
Cluster-110256.5	65.59	64.86	64.72	28.22	30.13	28.77	2873	2458	2756	1040	1189	1062	-1.2108	4.17179e-172	1.65197e-169	down	2059	K01188 beta-glucosidase [EC:3.2.1.21] | (RefSeq) 4-hydroxy-7-methoxy-3-oxo-3,4-dihydro-2H-1, 4-benzoxazin-2-yl glucoside beta-D-glucosidase 1d, chloroplastic-like (A)	ko00460: Cyanoamino acid metabolism; ko00500: Starch and sucrose metabolism; ko00999: Biosynthesis of various plant secondary metabolites; ko01100: Metabolic pathways; ko01110: Biosynthesis of secondary metabolites	4-hydroxy-7-methoxy-3-oxo-3,4-dihydro-2H-1,4-benzoxazin-2-yl glucoside beta-D-glucosidase 1d, chloroplastic-like [Triticum aestivum]	HGL1D_WHEAT RecName: Full=4-hydroxy-7-methoxy-3-oxo-3,4-dihydro-2H-1,4-benzoxazin-2-yl glucoside beta-D-glucosidase 1d, chloroplastic; EC=3.2.1.182; AltName: Full=Beta-glucosidase 1d; Short=TaGlu1d; EC=3.2.1.21; Flags: Precursor;	A0A446UPC0_TRITD SubName: Full=Uncharacterized protein {ECO:0000313|EMBL:VAI37432.1};	Beta-glucosidase, lactase phlorizinhydrolase, and related proteins	GO:0009507,chloroplast; GO:0008422,beta-glucosidase activity; GO:0102726,DIMBOA glucoside beta-D-glucosidase activity; GO:0102483,scopolin beta-glucosidase activity; GO:0005975,carbohydrate metabolic process; GO:0003674,molecular_function; GO:0003824,catalytic activity; GO:0004553,hydrolase activity, hydrolyzing O-glycosyl compounds; GO:0015926,glucosidase activity; GO:0016787,hydrolase activity;…	Glycosyl hydrolase family 1	--	--	--
Cluster-111869.11	55.29	60.68	63.91	148.77	152.19	142.62	797	713	802	1946	2049	1866	1.42823	2.68272e-171	1.05698e-168	up	1086	--	--	uncharacterized protein LOC109751753 [Aegilops tauschii subsp. strangulata]	--	A0A453MB99_AEGTS SubName: Full=Uncharacterized protein {ECO:0000313|EnsemblPlants:AET5Gv21127200.3};	--	--	--	--	--	--
Cluster-61239.5	59.37	60.24	58.85	134.44	136.01	138.33	1296	1138	1248	2466	2676	2535	1.14639	3.96266e-171	1.55346e-168	up	1180	K23719 nuclear mRNA export protein SAC3 | (RefSeq) SAC3 family protein C-like isoform X1 (A)	--	--	--	--	--	--	--	--	--	--
Cluster-108764.4	238.78	258.77	247.58	90.96	88.65	94.94	2354	2206	2359	750	785	773	-1.49902	6.26459e-170	2.44366e-167	down	849	K19784 chromate reductase, NAD(P)H dehydrogenase (quinone) | (RefSeq) probable NADPH:quinone oxidoreductase 1 (A)	--	probable NADPH:quinone oxidoreductase 1 [Triticum dicoccoides]	NQR1_ORYSJ RecName: Full=Probable NADPH:quinone oxidoreductase 1; EC=1.6.5.2;	A0A453E4R8_AEGTS RecName: Full=NAD(P)H dehydrogenase (quinone) {ECO:0000256|ARBA:ARBA00012648}; EC=1.6.5.2 {ECO:0000256|ARBA:ARBA00012648};	Predicted flavoprotein	GO:0005829,cytosol; GO:0010181,FMN binding; GO:0050136,NADH dehydrogenase (quinone) activity; GO:0008753,NADPH dehydrogenase (quinone) activity; GO:0000166,nucleotide binding; GO:0003674,molecular_function; GO:0005488,binding; GO:0032553,ribonucleotide binding; GO:0036094,small molecule binding; GO:0043167,ion binding; GO:0043168,anion binding; GO:0097159,organic cyclic compound binding; GO:00973…	NADPH-dependent FMN reductase	--	--	--
Cluster-114028.0	86.81	78.14	69.88	225.83	220.12	201.26	1215	1010	1019	2944	3243	3222	1.62308	1.57667e-168	6.05973e-166	up	1254	K23047 E3 ubiquitin-protein ligase UNKL [EC:2.3.2.27] | (RefSeq) zinc finger CCCH domain-containing protein 2-like (A)	--	zinc finger CCCH domain-containing protein 33 [Aegilops tauschii subsp. strangulata]	C3H47_ARATH RecName: Full=Zinc finger CCCH domain-containing protein 47; Short=AtC3H47; AltName: Full=AtSZF1;	A0A453GYD7_AEGTS RecName: Full=C3H1-type domain-containing protein {ECO:0000259|PROSITE:PS50103};	CCCH-type Zn-finger protein	GO:0005634,nucleus; GO:0003677,DNA binding; GO:0003700,DNA-binding transcription factor activity; GO:0046872,metal ion binding; GO:0071456,cellular response to hypoxia; GO:0006355,regulation of DNA-templated transcription; GO:0003674,molecular_function; GO:0003676,nucleic acid binding; GO:0005488,binding; GO:0097159,organic cyclic compound binding; GO:1901363,heterocyclic compound binding; GO:014…	Zinc finger C-x8-C-x5-C-x3-H type (and similar)	C3H	TF	C3H
Cluster-134022.2	21.26	16.25	23.5	173.89	176.4	171.73	146	96	156	996	1095	976	3.03613	3.70766e-168	1.41805e-165	up	582	--	--	--	--	A0A7R9WGL7_9STRA SubName: Full=Hypothetical protein {ECO:0000313|EMBL:CAD8324143.1};	--	GO:0005576,extracellular region; GO:0008061,chitin binding; GO:0003674,molecular_function; GO:0005488,binding; GO:0097367,carbohydrate derivative binding; GO:0005575,cellular_component; GO:0110165,cellular anatomical entity	Cerato-platanin	--	--	--
Cluster-83453.4	364.75	392.63	384.73	107.91	88.89	90.91	2092	1954	2138	514	460	429	-2.05426	1.58112e-167	6.01786e-165	down	677	K00430 peroxidase [EC:1.11.1.7] | (RefSeq) peroxidase-like (A)	ko00940: Phenylpropanoid biosynthesis; ko01100: Metabolic pathways; ko01110: Biosynthesis of secondary metabolites	unnamed protein product [Triticum turgidum subsp. durum]	PER1_WHEAT RecName: Full=Peroxidase; EC=1.11.1.7; AltName: Full=WP2; Flags: Precursor;	M8C1M6_AEGTA RecName: Full=Peroxidase {ECO:0000256|RuleBase:RU362060}; EC=1.11.1.7 {ECO:0000256|RuleBase:RU362060};	--	GO:0005576,extracellular region; GO:0020037,heme binding; GO:0046872,metal ion binding; GO:0004601,peroxidase activity; GO:0042744,hydrogen peroxide catabolic process; GO:0006979,response to oxidative stress; GO:0003674,molecular_function; GO:0005488,binding; GO:0046906,tetrapyrrole binding; GO:0097159,organic cyclic compound binding; GO:1901363,heterocyclic compound binding; GO:0043167,ion bindi…	Peroxidase	--	--	--
Cluster-8103.8	121.17	109.75	112.63	53.57	52.93	52.72	6369	4989	5755	2372	2416	2336	-1.17436	4.28871e-167	1.62443e-164	down	2409	K10534 nitrate reductase (NAD(P)H) [EC:1.7.1.1 1.7.1.2 1.7.1.3] | (RefSeq) nitrate reductase [NADH]-like (A)	ko00910: Nitrogen metabolism; ko01100: Metabolic pathways	nitrate reductase [NADH]	NIA2_HORVU RecName: Full=Nitrate reductase [NADH]; Short=NR; EC=1.7.1.1; Flags: Fragment;	A0A446VXW0_TRITD RecName: Full=Nitrate reductase {ECO:0000256|PIRNR:PIRNR000233};	Sulfite oxidase, molybdopterin-binding component	GO:0031090,organelle membrane; GO:0031984,organelle subcompartment; GO:0071949,FAD binding; GO:0020037,heme binding; GO:0030151,molybdenum ion binding; GO:0043546,molybdopterin cofactor binding; GO:0009703,nitrate reductase (NADH) activity; GO:0050464,nitrate reductase (NADPH) activity; GO:0042128,nitrate assimilation; GO:0006809,nitric oxide biosynthetic process; GO:0000166,nucleotide binding; G…	Oxidoreductase molybdopterin binding domain	--	--	--
Cluster-81418.5	9.61	12.12	9.78	99.59	108.44	90.77	133	145	131	1156	1351	1051	3.20085	1.69645e-166	6.39471e-164	up	863	--	--	--	--	--	--	--	--	--	--	--
Cluster-92214.0	111.76	103.32	103.13	236.77	241.3	249.04	1944	1556	1743	3456	3784	3629	1.13968	2.08142e-166	7.80833e-164	up	1003	K03260 translation initiation factor 4G | (RefSeq) eukaryotic translation initiation factor 4G-like (A)	--	--	--	--	--	--	--	--	--	--
Cluster-134887.0	69.47	73.43	70.23	0.49	0.34	0.69	1564	1423	1531	11	9	14	-6.9687	8.78517e-165	3.26446e-162	down	1743	--	--	uncharacterized protein LOC112011907 [Quercus suber]	Y4967_ARATH RecName: Full=Uncharacterized oxidoreductase At4g09670; EC=1.-.-.-;	A0A8J4T3Y3_9STRA RecName: Full=GFO_IDH_MocA domain-containing protein {ECO:0000259|Pfam:PF01408};	Predicted oxidoreductase	GO:0005829,cytosol; GO:0000166,nucleotide binding; GO:0016491,oxidoreductase activity; GO:0003674,molecular_function; GO:0005488,binding; GO:0036094,small molecule binding; GO:0097159,organic cyclic compound binding; GO:1901265,nucleoside phosphate binding; GO:1901363,heterocyclic compound binding; GO:0003824,catalytic activity; GO:0005575,cellular_component; GO:0005622,intracellular anatomical s…	Oxidoreductase family, NAD-binding Rossmann fold	--	--	--
Cluster-96180.3	196.45	194.2	192.56	95.06	89.53	100.49	5742	4913	5469	2340	2355	2472	-1.0817	1.3454e-163	4.92925e-161	down	1604	K15283 solute carrier family 35, member E1 | (RefSeq) glucose-6-phosphate/phosphate translocator 2, chloroplastic-like (A)	--	unnamed protein product [Triticum turgidum subsp. durum]	GPT2_ARATH RecName: Full=Glucose-6-phosphate/phosphate translocator 2, chloroplastic {ECO:0000303|PubMed:15722468}; Short=AtGPT2 {ECO:0000303|PubMed:15722468}; Flags: Precursor;	A0A453BDN6_AEGTS RecName: Full=TPT domain-containing protein {ECO:0000259|Pfam:PF03151};	Glucose-6-phosphate/phosphate and phosphoenolpyruvate/phosphate antiporter	GO:0009507,chloroplast; GO:0031969,chloroplast membrane; GO:0005794,Golgi apparatus; GO:0016021,integral component of membrane; GO:0000325,plant-type vacuole; GO:0015297,antiporter activity; GO:0015152,glucose-6-phosphate transmembrane transporter activity; GO:0005315,inorganic phosphate transmembrane transporter activity; GO:0015120,phosphoglycerate transmembrane transporter activity; GO:0071917…	Protein gp45 of Bacteriophage A118	--	--	--
Cluster-17391.1	19.46	28.63	34.82	170.67	156.25	136.28	767	607	622	2639	2949	2380	2.08299	6.68728e-163	2.43868e-160	up	2098	K01638 malate synthase [EC:2.3.3.9] | (RefSeq) uncharacterized protein (A)	ko00620: Pyruvate metabolism; ko00630: Glyoxylate and dicarboxylate metabolism; ko01100: Metabolic pathways; ko01110: Biosynthesis of secondary metabolites; ko01200: Carbon metabolism	malate synthase, glyoxysomal-like [Quercus suber]	MASY_GOSHI RecName: Full=Malate synthase, glyoxysomal; EC=2.3.3.9;	A0A0D6QT00_ARACU RecName: Full=Malate synthase {ECO:0000256|ARBA:ARBA00012636, ECO:0000256|RuleBase:RU000555}; EC=2.3.3.9 {ECO:0000256|ARBA:ARBA00012636, ECO:0000256|RuleBase:RU000555};	Malate synthase	GO:0005737,cytoplasm; GO:0009514,glyoxysome; GO:0004474,malate synthase activity; GO:0006097,glyoxylate cycle; GO:0006099,tricarboxylic acid cycle; GO:0003674,molecular_function; GO:0003824,catalytic activity; GO:0016740,transferase activity; GO:0016746,acyltransferase activity; GO:0046912,acyltransferase activity, acyl groups converted into alkyl on transfer; GO:0005975,carbohydrate metabolic pr…	Malate synthase	--	--	--
Cluster-134413.0	23.45	22.44	23.28	54.95	54.71	56.08	1143	946	1103	2256	2393	2304	1.21083	1.40183e-162	5.08845e-160	up	2267	K11982 E3 ubiquitin-protein ligase RNF115/126 [EC:2.3.2.27] | (RefSeq) hypothetical protein (A)	--	E3 ubiquitin-protein ligase RDUF1-like [Triticum aestivum]	RDUF2_ARATH RecName: Full=E3 ubiquitin-protein ligase RDUF2 {ECO:0000305}; EC=2.3.2.27 {ECO:0000305}; AltName: Full=RING and DUF1117 domain-containing protein 2 {ECO:0000305}; Short=AtRDUF2 {ECO:0000303|PubMed:22405823}; AltName: Full=RING-type E3 ubiquitin transferase RDUF2 {ECO:0000305};	A0A3B5YR03_WHEAT RecName: Full=RING-type E3 ubiquitin transferase {ECO:0000256|ARBA:ARBA00012483}; EC=2.3.2.27 {ECO:0000256|ARBA:ARBA00012483};	FOG: Predicted E3 ubiquitin ligase	GO:0005737,cytoplasm; GO:0005829,cytosol; GO:0046872,metal ion binding; GO:0061630,ubiquitin protein ligase activity; GO:0004842,ubiquitin-protein transferase activity; GO:0009738,abscisic acid-activated signaling pathway; GO:0051865,protein autoubiquitination; GO:0016567,protein ubiquitination; GO:0009737,response to abscisic acid; GO:0009414,response to water deprivation; GO:0003674,molecular_f…	Protein of unknown function (DUF1117)	--	--	--
Cluster-115494.7	133.11	135.87	124.43	66.02	67.51	66.46	6427	5675	5841	2685	2938	2704	-1.02258	1.44005e-162	5.20311e-160	down	2238	K00392 sulfite reductase (ferredoxin) [EC:1.8.7.1] | (RefSeq) sulfite reductase [ferredoxin], chloroplastic-like (A)	ko00920: Sulfur metabolism; ko01100: Metabolic pathways	sulfite reductase [ferredoxin]	SIR_MAIZE RecName: Full=Sulfite reductase [ferredoxin], chloroplastic; Short=ZmSiR; EC=1.8.7.1 {ECO:0000269|PubMed:10506201, ECO:0000269|PubMed:10712553}; Flags: Precursor;	A0A3B5Z1L6_WHEAT RecName: Full=Assimilatory sulfite reductase (ferredoxin) {ECO:0000256|ARBA:ARBA00012353}; EC=1.8.7.1 {ECO:0000256|ARBA:ARBA00012353};	Sulfite reductase (ferredoxin)	GO:0042644,chloroplast nucleoid; GO:0009570,chloroplast stroma; GO:0009337,sulfite reductase complex (NADPH); GO:0051539,4 iron, 4 sulfur cluster binding; GO:0003677,DNA binding; GO:0003690,double-stranded DNA binding; GO:0020037,heme binding; GO:0046872,metal ion binding; GO:0050311,sulfite reductase (ferredoxin) activity; GO:0016002,sulfite reductase activity; GO:0045892,negative regulation of …	Nitrite and sulphite reductase 4Fe-4S domain	--	--	--
Cluster-67557.0	41.59	40.14	40.99	90.51	90.44	90.33	1374	1147	1316	2516	2693	2511	1.0958	1.19618e-161	4.24372e-159	up	1628	K06617 raffinose synthase [EC:2.4.1.82] | (RefSeq) probable galactinol--sucrose galactosyltransferase 6 (A)	ko00052: Galactose metabolism; ko01100: Metabolic pathways	probable galactinol--sucrose galactosyltransferase 6 [Triticum dicoccoides]	RFS6_ARATH RecName: Full=Probable galactinol--sucrose galactosyltransferase 6; EC=2.4.1.82; AltName: Full=Protein DARK INDUCIBLE 10; AltName: Full=Raffinose synthase 6;	A0A3B6S9N8_WHEAT RecName: Full=Galactinol--sucrose galactosyltransferase {ECO:0000256|ARBA:ARBA00012708}; EC=2.4.1.82 {ECO:0000256|ARBA:ARBA00012708};	--	GO:0047274,galactinol-sucrose galactosyltransferase activity; GO:0005975,carbohydrate metabolic process; GO:0003674,molecular_function; GO:0003824,catalytic activity; GO:0008378,galactosyltransferase activity; GO:0016740,transferase activity; GO:0016757,glycosyltransferase activity; GO:0016758,hexosyltransferase activity; GO:0008150,biological_process; GO:0008152,metabolic process; GO:0044238,pri…	Raffinose synthase or seed imbibition protein Sip1	--	--	--
Cluster-104008.24	299.79	289.89	305.51	69.27	77.58	79.94	1396	1172	1377	267	326	304	-2.04979	3.79852e-161	1.34154e-158	down	492	K05953 nicotianamine synthase [EC:2.5.1.43] | (RefSeq) probable nicotianamine synthase 4 (A)	ko00270: Cysteine and methionine metabolism; ko00999: Biosynthesis of various plant secondary metabolites; ko01100: Metabolic pathways; ko01110: Biosynthesis of secondary metabolites	probable nicotianamine synthase 4 [Triticum aestivum]	NAS4_HORVU RecName: Full=Probable nicotianamine synthase 4; EC=2.5.1.43; AltName: Full=HvNAS4; AltName: Full=S-adenosyl-L-methionine:S-adenosyl-L-methionine:S-adenosyl-methionine 3-amino-3-carboxypropyltransferase 4;	A0A453Q128_AEGTS RecName: Full=Nicotianamine synthase {ECO:0000256|RuleBase:RU368095}; EC=2.5.1.43 {ECO:0000256|RuleBase:RU368095};	--	GO:0030410,nicotianamine synthase activity; GO:0030418,nicotianamine biosynthetic process; GO:0003674,molecular_function; GO:0003824,catalytic activity; GO:0016740,transferase activity; GO:0016765,transferase activity, transferring alkyl or aryl (other than methyl) groups; GO:0006082,organic acid metabolic process; GO:0006576,cellular biogenic amine metabolic process; GO:0006807,nitrogen compound…	Nicotianamine synthase protein	--	--	--
Cluster-138019.2	90.71	89.4	94.5	33.49	31.15	36.78	4519	3846	4578	1403	1401	1547	-1.48327	6.9355e-161	2.43847e-158	down	2564	K08232 monodehydroascorbate reductase (NADH) [EC:1.6.5.4] | (RefSeq) monodehydroascorbate reductase 5, chlorplastic (A)	ko00053: Ascorbate and aldarate metabolism; ko01100: Metabolic pathways	unnamed protein product [Triticum turgidum subsp. durum]	MDAR5_ORYSJ RecName: Full=Monodehydroascorbate reductase 5, chlorplastic {ECO:0000305}; Short=OsMADR5 {ECO:0000303|PubMed:25546583}; Short=OsMDHAR5 {ECO:0000303|PubMed:25546583}; EC=1.6.5.4 {ECO:0000250|UniProtKB:Q652L6}; Flags: Precursor;	A0A446XI58_TRITD RecName: Full=Pyr_redox_2 domain-containing protein {ECO:0000259|Pfam:PF07992};	Monodehydroascorbate/ferredoxin reductase	GO:0009507,chloroplast; GO:0005737,cytoplasm; GO:0005739,mitochondrion; GO:0010319,stromule; GO:0050660,flavin adenine dinucleotide binding; GO:0016656,monodehydroascorbate reductase (NADH) activity; GO:0016651,oxidoreductase activity, acting on NAD(P)H; GO:0009409,response to cold; GO:0000166,nucleotide binding; GO:0003674,molecular_function; GO:0005488,binding; GO:0036094,small molecule binding…	Pyridine nucleotide-disulphide oxidoreductase	--	--	--
Cluster-115747.0	25.17	27.01	28.87	70.83	71.15	72	1341	1250	1502	3170	3412	3234	1.34796	9.76784e-161	3.41896e-158	up	2459	K24184 cytochrome P450 family 89 subfamily A [EC:1.14.-.-] | (RefSeq) cytochrome P450 89A2-like (A)	--	hypothetical protein CFC21_026687 [Triticum aestivum]	C89A2_ARATH RecName: Full=Cytochrome P450 89A2; EC=1.14.-.-; AltName: Full=ATH 6-1; AltName: Full=CYPLXXXIX;	A0A3B6CGX4_WHEAT SubName: Full=Uncharacterized protein {ECO:0000313|EnsemblPlants:TraesCS2B02G606600.1.cds1};	Cytochrome P450 CYP2 subfamily	GO:0016021,integral component of membrane; GO:0016020,membrane; GO:0020037,heme binding; GO:0005506,iron ion binding; GO:0016709,oxidoreductase activity, acting on paired donors, with incorporation or reduction of molecular oxygen, NAD(P)H as one donor, and incorporation of one atom of oxygen; GO:0003674,molecular_function; GO:0005488,binding; GO:0046906,tetrapyrrole binding; GO:0097159,organic c…	Cytochrome P450	--	--	--
Cluster-104008.25	563.31	573.58	540.85	125.35	156.94	151.82	2766	2423	2569	511	698	612	-2.00758	4.28965e-159	1.46869e-156	down	655	K05953 nicotianamine synthase [EC:2.5.1.43] | (RefSeq) probable nicotianamine synthase 2 (A)	ko00270: Cysteine and methionine metabolism; ko00999: Biosynthesis of various plant secondary metabolites; ko01100: Metabolic pathways; ko01110: Biosynthesis of secondary metabolites	probable nicotianamine synthase 2 [Triticum urartu]	NAS2_HORVU RecName: Full=Probable nicotianamine synthase 2; EC=2.5.1.43; AltName: Full=HvNAS2; AltName: Full=S-adenosyl-L-methionine:S-adenosyl-L-methionine:S-adenosyl-methionine 3-amino-3-carboxypropyltransferase 2;	A0A446LTD8_TRITD RecName: Full=Nicotianamine synthase {ECO:0000256|RuleBase:RU368095}; EC=2.5.1.43 {ECO:0000256|RuleBase:RU368095};	--	GO:0030410,nicotianamine synthase activity; GO:0030418,nicotianamine biosynthetic process; GO:0003674,molecular_function; GO:0003824,catalytic activity; GO:0016740,transferase activity; GO:0016765,transferase activity, transferring alkyl or aryl (other than methyl) groups; GO:0006082,organic acid metabolic process; GO:0006576,cellular biogenic amine metabolic process; GO:0006807,nitrogen compound…	Nicotianamine synthase protein	--	--	--
Cluster-95430.0	106.92	106.23	100.65	15.83	18.37	16.6	1053	905	961	130	163	135	-2.68454	5.79888e-159	1.97679e-156	down	701	--	--	hypothetical protein TRIUR3_32256 [Triticum urartu]	--	M8AA52_TRIUA SubName: Full=Uncharacterized protein {ECO:0000313|EMBL:EMS61525.1, ECO:0000313|EnsemblPlants:TRIUR3_32256-P1};	--	--	--	--	--	--
Cluster-90985.4	1.39	1.39	1.17	15.59	14.06	13.88	82	69	71	827	798	733	3.49642	6.82059e-158	2.29514e-155	up	2826	--	--	uncharacterized protein LOC112032696 [Quercus suber]	--	A0A7S3NDF3_9STRA SubName: Full=Hypothetical protein {ECO:0000313|EMBL:CAE0359807.1}; Flags: Fragment;	--	--	Zinc finger, C2H2 type	C2H2	TF	C2H2
Cluster-6516.194	145.68	138.22	137.95	45.76	41.03	42.83	1769	1446	1637	467	448	442	-1.74947	1.73264e-156	5.80546e-154	down	807	K21351 sucrose:sucrose fructosyltransferase [EC:2.4.1.99] | (RefSeq) sucrose:sucrose 1-fructosyltransferase-like (A)	--	hypothetical protein CFC21_095023 [Triticum aestivum]	SST_FESAR RecName: Full=Sucrose:sucrose 1-fructosyltransferase; EC=2.4.1.99; AltName: Full=Sucrose 1(F)-fructosyltransferase; AltName: Full=Sucrose:sucrose 1(F)-beta-D-fructosyltransferase; Flags: Precursor;	A0A3B6R6I6_WHEAT RecName: Full=Glyco_hydro_32C domain-containing protein {ECO:0000259|Pfam:PF08244};	Beta-fructofuranosidase (invertase)	GO:0005773,vacuole; GO:0004564,beta-fructofuranosidase activity; GO:0050306,sucrose 1F-fructosyltransferase activity; GO:0005975,carbohydrate metabolic process; GO:0003674,molecular_function; GO:0003824,catalytic activity; GO:0004553,hydrolase activity, hydrolyzing O-glycosyl compounds; GO:0016787,hydrolase activity; GO:0016798,hydrolase activity, acting on glycosyl bonds; GO:0016740,transferase …	Glycosyl hydrolases family 32 C terminal	--	--	--
Cluster-81537.5	220.32	229.68	229.59	105.86	109.08	104.86	3042	2729	3097	1222	1352	1194	-1.14926	2.71747e-156	9.0187e-154	down	991	K00430 peroxidase [EC:1.11.1.7] | (RefSeq) peroxidase 2-like (A)	ko00940: Phenylpropanoid biosynthesis; ko01100: Metabolic pathways; ko01110: Biosynthesis of secondary metabolites	unnamed protein product [Triticum turgidum subsp. durum]	PER2_ORYSJ RecName: Full=Peroxidase 2; EC=1.11.1.7; Flags: Precursor;	M8C136_AEGTA RecName: Full=Peroxidase {ECO:0000256|RuleBase:RU362060}; EC=1.11.1.7 {ECO:0000256|RuleBase:RU362060};	--	GO:0005576,extracellular region; GO:0020037,heme binding; GO:0046872,metal ion binding; GO:0004601,peroxidase activity; GO:0042744,hydrogen peroxide catabolic process; GO:0006979,response to oxidative stress; GO:0003674,molecular_function; GO:0005488,binding; GO:0046906,tetrapyrrole binding; GO:0097159,organic cyclic compound binding; GO:1901363,heterocyclic compound binding; GO:0043167,ion bindi…	Peroxidase	--	--	--
Cluster-76134.0	135.25	130.21	127.2	47.16	48.43	54.16	3354	2802	3071	988	1074	1130	-1.44355	2.72614e-156	9.0187e-154	down	1311	K24028 salicylic acid 3-hydroxylase [EC:1.14.11.-] | (RefSeq) protein DMR6-LIKE OXYGENASE 1-like (A)	--	jasmonate-induced oxygenase 2 [Aegilops tauschii subsp. strangulata]	JOX2_ARATH RecName: Full=Jasmonate-induced oxygenase 2 {ECO:0000303|PubMed:28559313}; EC=1.14.11.- {ECO:0000269|PubMed:28559313, ECO:0000269|PubMed:28760569, ECO:0000269|PubMed:33516967}; AltName: Full=2-oxoglutarate-dependent dioxygenase JOX2 {ECO:0000305}; AltName: Full=Jasmonic acid oxidase 2 {ECO:0000303|PubMed:28760569};	A0A453HF26_AEGTS RecName: Full=Fe2OG dioxygenase domain-containing protein {ECO:0000259|PROSITE:PS51471};	Iron/ascorbate family oxidoreductases	GO:0005829,cytosol; GO:0051213,dioxygenase activity; GO:0005506,iron ion binding; GO:0120091,jasmonic acid hydrolase; GO:0097237,cellular response to toxic substance; GO:0006952,defense response; GO:1900366,negative regulation of defense response to insect; GO:1900150,regulation of defense response to fungus; GO:2000022,regulation of jasmonic acid mediated signaling pathway; GO:0003674,molecular_…	2OG-Fe(II) oxygenase superfamily	--	--	--
Cluster-135275.0	39.44	40.94	40.54	0.37	0.29	0.51	1382	1242	1387	11	8	15	-6.79622	5.07414e-156	1.67159e-153	down	1730	K12795 suppressor of G2 allele of SKP1 | (RefSeq) protein SGT1 homolog (A)	ko04626: Plant-pathogen interaction	MFS transporter prlL-like [Quercus suber]	--	A0A5N6L139_9ROSI RecName: Full=MFS domain-containing protein {ECO:0000259|PROSITE:PS50850};	Permease of the major facilitator superfamily	GO:0016021,integral component of membrane; GO:0005681,spliceosomal complex; GO:0022857,transmembrane transporter activity; GO:0008380,RNA splicing; GO:0003674,molecular_function; GO:0005215,transporter activity; GO:0006139,nucleobase-containing compound metabolic process; GO:0006396,RNA processing; GO:0006725,cellular aromatic compound metabolic process; GO:0006807,nitrogen compound metabolic pro…	Major Facilitator Superfamily	--	--	--
Cluster-25528.1	5.63	2.85	1.8	26.95	25.49	27.43	66	65	70	841	906	724	3.70397	7.16248e-156	2.33018e-153	up	2057	K24193 MFS transporter, SP family, sugar:H+ symporter | (RefSeq) sugar transport protein 10-like (A)	--	putative polyol transporter 2 [Quercus suber]	PLT5_ARATH RecName: Full=Polyol transporter 5; AltName: Full=Protein POLYOL TRANSPORTER 5; Short=AtPLT5; AltName: Full=Sugar-proton symporter PLT5;	A0A0D6QZZ0_ARACU RecName: Full=MFS domain-containing protein {ECO:0000259|PROSITE:PS50850};	Predicted transporter (major facilitator superfamily)	GO:0016021,integral component of membrane; GO:0005886,plasma membrane; GO:0005351,carbohydrate:proton symporter activity; GO:0015591,D-ribose transmembrane transporter activity; GO:0015148,D-xylose transmembrane transporter activity; GO:0005354,galactose transmembrane transporter activity; GO:0005355,glucose transmembrane transporter activity; GO:0015168,glycerol transmembrane transporter activit…	Sugar (and other) transporter	--	--	--
Cluster-131521.0	13.25	12.86	13.15	1.57	1.75	1.67	856	726	844	84	100	94	-3.03835	4.26032e-155	1.36898e-152	down	3905	K26554 MFS transporter, POT/PTR family, low-affinity nitrate transporter | (RefSeq) protein NRT1/ PTR FAMILY 7.3-like (A)	--	hypothetical protein ZWY2020_022014 [Hordeum vulgare]	PTR14_ARATH RecName: Full=Protein NRT1/ PTR FAMILY 7.3; Short=AtNPF7.3; AltName: Full=Nitrate transporter 1.5;	A0A453PEU2_AEGTS SubName: Full=Uncharacterized protein {ECO:0000313|EnsemblPlants:AET6Gv20706200.4};	H+/oligopeptide symporter	GO:0016021,integral component of membrane; GO:0005886,plasma membrane; GO:0015112,nitrate transmembrane transporter activity; GO:0015386,potassium:proton antiporter activity; GO:0015293,symporter activity; GO:0010150,leaf senescence; GO:0015706,nitrate transmembrane transport; GO:0055075,potassium ion homeostasis; GO:1902600,proton transmembrane transport; GO:0010167,response to nitrate; GO:00036…	POT family	--	--	--
Cluster-82912.0	218.33	233.11	228.7	472.99	495.44	496.87	1916	1773	1947	3467	3923	3621	1.05102	1.05577e-154	3.36493e-152	up	658	K14500 BR-signaling kinase [EC:2.7.11.1] | (RefSeq) uncharacterized protein LOC108834630 (A)	ko04075: Plant hormone signal transduction	hypothetical protein ZWY2020_025799 [Hordeum vulgare]	PLAT2_ARATH RecName: Full=PLAT domain-containing protein 2 {ECO:0000305}; Short=AtPLAT2 {ECO:0000303|PubMed:25396746}; Short=PLAT domain protein 2 {ECO:0000303|PubMed:25396746}; Flags: Precursor;	A0A8I6XF50_HORVV RecName: Full=PLAT domain-containing protein {ECO:0000259|PROSITE:PS50095};	--	GO:0005783,endoplasmic reticulum; GO:0099503,secretory vesicle; GO:0009579,thylakoid; GO:0005773,vacuole; GO:0005575,cellular_component; GO:0005622,intracellular anatomical structure; GO:0005737,cytoplasm; GO:0012505,endomembrane system; GO:0043226,organelle; GO:0043227,membrane-bounded organelle; GO:0043229,intracellular organelle; GO:0043231,intracellular membrane-bounded organelle; GO:0110165,…	PLAT/LH2 domain	--	--	--
Cluster-136591.0	40.03	35	39.46	2.31	2.49	2.75	925	696	892	45	51	54	-3.97508	4.18043e-154	1.32699e-151	down	1286	K00059 3-oxoacyl-[acyl-carrier protein] reductase [EC:1.1.1.100] | (RefSeq) 3-oxoacyl-[acyl-carrier-protein] reductase 4 (A)	ko00061: Fatty acid biosynthesis; ko00780: Biotin metabolism; ko01100: Metabolic pathways; ko01110: Biosynthesis of secondary metabolites; ko01212: Fatty acid metabolism; ko01240: Biosynthesis of cofactors	uncharacterized protein LOC111992893 [Quercus suber]	FABG_CUPLA RecName: Full=3-oxoacyl-[acyl-carrier-protein] reductase, chloroplastic; EC=1.1.1.100; AltName: Full=3-ketoacyl-acyl carrier protein reductase; Flags: Precursor;	A0A8J4SDM9_9STRA SubName: Full=Uncharacterized protein {ECO:0000313|EMBL:KAF4325757.1};	Reductases with broad range of substrate specificities	GO:0009507,chloroplast; GO:0004316,3-oxoacyl-[acyl-carrier-protein] reductase (NADPH) activity; GO:0051287,NAD binding; GO:0006633,fatty acid biosynthetic process; GO:0003674,molecular_function; GO:0003824,catalytic activity; GO:0004312,fatty acid synthase activity; GO:0016491,oxidoreductase activity; GO:0016614,oxidoreductase activity, acting on CH-OH group of donors; GO:0016616,oxidoreductase a…	Enoyl-(Acyl carrier protein) reductase	--	--	--
Cluster-134342.0	229.15	242.13	242.08	114.96	102.27	105.76	5907	5401	6064	2492	2376	2291	-1.19238	4.45993e-154	1.41e-151	down	1338	K02639 ferredoxin | (RefSeq) ferredoxin-6, chloroplastic-like (A)	ko00195: Photosynthesis; ko01100: Metabolic pathways	ferredoxin-6, chloroplastic-like [Triticum dicoccoides]	FER6_MAIZE RecName: Full=Ferredoxin-6, chloroplastic; AltName: Full=Ferredoxin VI; Short=Fd VI; Flags: Precursor;	A0A3B5ZWK8_WHEAT RecName: Full=Ferredoxin {ECO:0000256|RuleBase:RU364001};	--	GO:0009507,chloroplast; GO:0051537,2 iron, 2 sulfur cluster binding; GO:0009055,electron transfer activity; GO:0046872,metal ion binding; GO:0003674,molecular_function; GO:0005488,binding; GO:0051536,iron-sulfur cluster binding; GO:0051540,metal cluster binding; GO:0003824,catalytic activity; GO:0016491,oxidoreductase activity; GO:0043167,ion binding; GO:0043169,cation binding; GO:0005575,cellula…	2Fe-2S iron-sulfur cluster binding domain	--	--	--
Cluster-100216.0	110.51	115.47	119.41	20.89	27.06	21.59	1622	1466	1678	254	354	268	-2.36083	8.18474e-154	2.57721e-151	down	912	K08907 light-harvesting complex I chlorophyll a/b binding protein 1 | (RefSeq) light-harvesting complex protein (A)	ko00196: Photosynthesis - antenna proteins; ko01100: Metabolic pathways	--	FCPB_MACPY RecName: Full=Fucoxanthin-chlorophyll a-c binding protein B, chloroplastic; Flags: Precursor;	Q39969_HETAK SubName: Full=Fucoxanthin chlorophyll a /c binding protein {ECO:0000313|EMBL:CAA68028.1};	--	GO:0009535,chloroplast thylakoid membrane; GO:0016021,integral component of membrane; GO:0030076,light-harvesting complex; GO:0009523,photosystem II; GO:0016168,chlorophyll binding; GO:0009765,photosynthesis, light harvesting; GO:0003674,molecular_function; GO:0005488,binding; GO:0046906,tetrapyrrole binding; GO:0097159,organic cyclic compound binding; GO:1901363,heterocyclic compound binding; GO…	Chlorophyll A-B binding protein	--	--	--
Cluster-120667.2	28.46	28.03	29.26	6.59	5.53	6.4	1221	1040	1220	238	213	231	-2.26292	8.65932e-154	2.71574e-151	down	2023	K12818 ATP-dependent RNA helicase DHX8/PRP22 [EC:3.6.4.13] | (RefSeq) hypothetical protein (A)	ko03040: Spliceosome	protein ZINC INDUCED FACILITATOR-LIKE 1-like [Triticum aestivum]	ZIFL1_ARATH RecName: Full=Protein ZINC INDUCED FACILITATOR-LIKE 1; AltName: Full=Protein ZIF-LIKE 1;	A0A3B6JGK2_WHEAT RecName: Full=MFS domain-containing protein {ECO:0000259|PROSITE:PS50850};	Permease of the major facilitator superfamily	GO:0016021,integral component of membrane; GO:0009705,plant-type vacuole membrane; GO:0005886,plasma membrane; GO:0022821,solute:potassium antiporter activity; GO:0010540,basipetal auxin transport; GO:0009630,gravitropism; GO:0090333,regulation of stomatal closure; GO:0009414,response to water deprivation; GO:0048364,root development; GO:0003674,molecular_function; GO:0005215,transporter activity…	Major Facilitator Superfamily	--	--	--
Cluster-132567.0	104.95	107.79	105.38	48.48	45.04	44.11	2656	2357	2589	1025	1026	935	-1.26195	1.28535e-152	4.01506e-150	down	1412	K19891 glucan endo-1,3-beta-glucosidase 1/2/3 [EC:3.2.1.39] | (RefSeq) hypothetical protein (A)	ko00500: Starch and sucrose metabolism; ko01100: Metabolic pathways	unnamed protein product [Triticum turgidum subsp. durum]	E1313_ARATH RecName: Full=Glucan endo-1,3-beta-glucosidase 13; EC=3.2.1.39; AltName: Full=(1->3)-beta-glucan endohydrolase 13; Short=(1->3)-beta-glucanase 13; AltName: Full=Beta-1,3-endoglucanase 13; Short=Beta-1,3-glucanase 13; Flags: Precursor;	A0A446KVL3_TRITD SubName: Full=Uncharacterized protein {ECO:0000313|EMBL:VAH29326.1};	--	GO:0031225,anchored component of membrane; GO:0046658,anchored component of plasma membrane; GO:0005576,extracellular region; GO:0005886,plasma membrane; GO:0009536,plastid; GO:0042973,glucan endo-1,3-beta-D-glucosidase activity; GO:0005975,carbohydrate metabolic process; GO:0071555,cell wall organization; GO:0006952,defense response; GO:0003674,molecular_function; GO:0003824,catalytic activity; …	Glycosyl hydrolases family 17	--	--	--
Cluster-47355.0	84.74	85.73	84.87	37.52	33.42	37.11	2973	2602	2894	1108	1057	1096	-1.28926	2.78445e-152	8.66327e-150	down	1710	K22736 vacuolar iron transporter family protein | (RefSeq) vacuolar iron transporter homolog 3-like isoform X1 (A)	--	uncharacterized protein LOC123410512 [Hordeum vulgare subsp. vulgare]	--	F2DK77_HORVV SubName: Full=Predicted protein {ECO:0000313|EMBL:BAJ95498.1};	--	GO:0016021,integral component of membrane; GO:0005575,cellular_component; GO:0016020,membrane; GO:0031224,intrinsic component of membrane; GO:0110165,cellular anatomical entity	Protein of unknown function, DUF599	--	--	--
Cluster-131847.5	21.33	20.65	20.79	58.52	57.47	54.49	892	743	840	2048	2153	1907	1.39026	1.78976e-151	5.52464e-149	up	2282	K07936 GTP-binding nuclear protein Ran | (RefSeq) GTP-binding nuclear protein Ran1B (A)	ko03008: Ribosome biogenesis in eukaryotes; ko03013: Nucleocytoplasmic transport; ko03250: Viral life cycle - HIV-1	protein ANTAGONIST OF LIKE HETEROCHROMATIN PROTEIN 1 [Aegilops tauschii subsp. strangulata]	ALP1_ARATH RecName: Full=Protein ANTAGONIST OF LIKE HETEROCHROMATIN PROTEIN 1 {ECO:0000303|PubMed:26642436}; EC=3.1.-.-;	A0A453EYZ9_AEGTS RecName: Full=DDE Tnp4 domain-containing protein {ECO:0000259|Pfam:PF13359};	Predicted transposase	GO:0035098,ESC/E(Z) complex; GO:0005634,nucleus; GO:0035102,PRC1 complex; GO:0003682,chromatin binding; GO:0046872,metal ion binding; GO:0004518,nuclease activity; GO:0040029,epigenetic regulation of gene expression; GO:0003674,molecular_function; GO:0005488,binding; GO:0043167,ion binding; GO:0043169,cation binding; GO:0003824,catalytic activity; GO:0016787,hydrolase activity; GO:0016788,hydrola…	DDE superfamily endonuclease	--	--	--
Cluster-19883.1	4.25	6.11	4.53	71.33	69.55	75.84	48	59	49	676	710	716	3.83653	4.97257e-149	1.52295e-146	up	760	K09753 cinnamoyl-CoA reductase [EC:1.2.1.44] | (RefSeq) cinnamoyl-CoA reductase 1-like (A)	ko00940: Phenylpropanoid biosynthesis; ko01100: Metabolic pathways; ko01110: Biosynthesis of secondary metabolites	cinnamoyl-CoA reductase 1-like [Triticum aestivum]	CCR1_PETHY RecName: Full=Cinnamoyl-CoA reductase 1 {ECO:0000303|PubMed:24985707, ECO:0000303|PubMed:25217505}; Short=PhCCR1 {ECO:0000303|PubMed:24985707, ECO:0000303|PubMed:25217505}; EC=1.2.1.44 {ECO:0000250|UniProtKB:Q9S9N9}; AltName: Full=Coniferylaldehyde synthase {ECO:0000305}; EC=1.2.1.- {ECO:0000269|PubMed:24985707, ECO:0000269|PubMed:25217505};	A0A3B6SEJ3_WHEAT RecName: Full=Epimerase domain-containing protein {ECO:0000259|Pfam:PF01370};	Flavonol reductase/cinnamoyl-CoA reductase	GO:0005737,cytoplasm; GO:0016621,cinnamoyl-CoA reductase activity; GO:0000166,nucleotide binding; GO:0007623,circadian rhythm; GO:0010597,green leaf volatile biosynthetic process; GO:0009809,lignin biosynthetic process; GO:0009699,phenylpropanoid biosynthetic process; GO:0003674,molecular_function; GO:0003824,catalytic activity; GO:0016491,oxidoreductase activity; GO:0016620,oxidoreductase activi…	NAD dependent epimerase/dehydratase family	--	--	--
Cluster-135428.8	10.96	10.21	26.31	71.57	123.54	87.15	400	322	367	1903	1849	1538	2.36835	5.50045e-149	1.67806e-146	up	1820	K08139 MFS transporter, SP family, sugar:H+ symporter | (RefSeq) high-affinity glucose transporter ght2-like (A)	--	hypothetical protein BT93_L4529 [Corymbia citriodora subsp. variegata]	STP11_ARATH RecName: Full=Sugar transport protein 11; AltName: Full=Hexose transporter 11;	F2EHH9_HORVV SubName: Full=Predicted protein {ECO:0000313|EMBL:BAK06801.1};	Predicted transporter (major facilitator superfamily)	GO:0016021,integral component of membrane; GO:0005886,plasma membrane; GO:0090406,pollen tube; GO:0015145,monosaccharide transmembrane transporter activity; GO:0015293,symporter activity; GO:0003674,molecular_function; GO:0005215,transporter activity; GO:0015144,carbohydrate transmembrane transporter activity; GO:0022857,transmembrane transporter activity; GO:0051119,sugar transmembrane transport…	Sugar (and other) transporter	--	--	--
Cluster-115483.5	70.53	73.98	71.64	157.83	151.67	145.62	2304	2083	2273	4334	4462	4010	1.02892	1.68675e-148	5.10616e-146	up	1616	K01373 cathepsin F [EC:3.4.22.41] | (RefSeq) cysteine proteinase 1-like (A)	ko04626: Plant-pathogen interaction	cysteine proteinase 1 [Aegilops tauschii subsp. strangulata]	CYSP1_MAIZE RecName: Full=Cysteine proteinase 1; EC=3.4.22.-; Flags: Precursor;	R7WAZ8_AEGTA SubName: Full=Cysteine proteinase 1 {ECO:0000313|EMBL:EMT16425.1, ECO:0000313|EnsemblPlants:EMT16425};	Cysteine proteinase Cathepsin F	GO:0005615,extracellular space; GO:0005764,lysosome; GO:0004197,cysteine-type endopeptidase activity; GO:0051603,proteolysis involved in protein catabolic process; GO:0003674,molecular_function; GO:0003824,catalytic activity; GO:0004175,endopeptidase activity; GO:0008233,peptidase activity; GO:0008234,cysteine-type peptidase activity; GO:0016787,hydrolase activity; GO:0140096,catalytic activity, …	Papain family cysteine protease	--	--	--
Cluster-6294.1	17.57	15.95	17.67	43.15	40.73	41.94	1540	1209	1506	3189	3218	3103	1.25018	1.95959e-148	5.90928e-146	up	3813	--	--	endoribonuclease YBEY, chloroplastic-like [Triticum urartu]	YBEY_ARATH RecName: Full=Endoribonuclease YBEY, chloroplastic {ECO:0000305}; EC=3.1.-.- {ECO:0000269|PubMed:25810095}; Flags: Precursor;	A0A446LIH8_TRITD SubName: Full=Uncharacterized protein {ECO:0000313|EMBL:VAH37340.1};	--	GO:0009507,chloroplast; GO:0009570,chloroplast stroma; GO:0004521,endoribonuclease activity; GO:0046872,metal ion binding; GO:0004222,metalloendopeptidase activity; GO:0009658,chloroplast organization; GO:1901259,chloroplast rRNA processing; GO:0003674,molecular_function; GO:0003824,catalytic activity; GO:0004518,nuclease activity; GO:0004519,endonuclease activity; GO:0004540,ribonuclease activit…	Endoribonuclease YbeY	--	--	--
Cluster-104008.22	332.46	318.57	325.09	97.84	89.2	109.28	1810	1502	1710	442	438	488	-1.78722	8.16861e-148	2.4445e-145	down	1014	K05953 nicotianamine synthase [EC:2.5.1.43] | (RefSeq) probable nicotianamine synthase 4 (A)	ko00270: Cysteine and methionine metabolism; ko00999: Biosynthesis of various plant secondary metabolites; ko01100: Metabolic pathways; ko01110: Biosynthesis of secondary metabolites	RecName: Full=Probable nicotianamine synthase 2; AltName: Full=HvNAS2; AltName: Full=S-adenosyl-L-methionine:S-adenosyl-L-methionine:S-adenosyl-methionine 3-amino-3-carboxypropyltransferase 2 [Hordeum vulgare]	NAS2_HORVU RecName: Full=Probable nicotianamine synthase 2; EC=2.5.1.43; AltName: Full=HvNAS2; AltName: Full=S-adenosyl-L-methionine:S-adenosyl-L-methionine:S-adenosyl-methionine 3-amino-3-carboxypropyltransferase 2;	F2DH77_HORVV RecName: Full=Nicotianamine synthase {ECO:0000256|RuleBase:RU368095}; EC=2.5.1.43 {ECO:0000256|RuleBase:RU368095};	--	GO:0030410,nicotianamine synthase activity; GO:0030418,nicotianamine biosynthetic process; GO:0003674,molecular_function; GO:0003824,catalytic activity; GO:0016740,transferase activity; GO:0016765,transferase activity, transferring alkyl or aryl (other than methyl) groups; GO:0006082,organic acid metabolic process; GO:0006576,cellular biogenic amine metabolic process; GO:0006807,nitrogen compound…	Nicotianamine synthase protein	--	--	--
Cluster-65572.0	30.93	32.43	31.94	7.18	7.38	6.76	1065	966	1069	208	229	196	-2.20685	4.1989e-147	1.24232e-144	down	1684	--	--	vegetative cell wall protein gp1-like [Triticum dicoccoides]	--	A0A446S9J7_TRITD SubName: Full=Uncharacterized protein {ECO:0000313|EMBL:VAI07817.1};	--	--	--	--	--	--
Cluster-6516.188	117.43	116.98	118.3	39.39	33.82	37.34	1608	1387	1573	452	417	427	-1.72953	9.17947e-146	2.7057e-143	down	855	K21351 sucrose:sucrose fructosyltransferase [EC:2.4.1.99] | (RefSeq) sucrose:sucrose 1-fructosyltransferase-like (A)	--	unnamed protein product [Triticum turgidum subsp. durum]	SST_FESAR RecName: Full=Sucrose:sucrose 1-fructosyltransferase; EC=2.4.1.99; AltName: Full=Sucrose 1(F)-fructosyltransferase; AltName: Full=Sucrose:sucrose 1(F)-beta-D-fructosyltransferase; Flags: Precursor;	A0A446WW16_TRITD SubName: Full=Uncharacterized protein {ECO:0000313|EMBL:VAI68227.1};	Beta-fructofuranosidase (invertase)	GO:0005773,vacuole; GO:0004564,beta-fructofuranosidase activity; GO:0050306,sucrose 1F-fructosyltransferase activity; GO:0005975,carbohydrate metabolic process; GO:0003674,molecular_function; GO:0003824,catalytic activity; GO:0004553,hydrolase activity, hydrolyzing O-glycosyl compounds; GO:0016787,hydrolase activity; GO:0016798,hydrolase activity, acting on glycosyl bonds; GO:0016740,transferase …	Glycosyl hydrolases family 32 N-terminal domain	--	--	--
Cluster-129983.0	9.95	10.25	10.52	32.02	31.25	30.17	567	495	584	1496	1595	1433	1.54521	5.55425e-145	1.61889e-142	up	2746	K03327 multidrug resistance protein, MATE family | (RefSeq) protein DETOXIFICATION 34-like (A)	--	hypothetical protein ZWY2020_031693 [Hordeum vulgare]	LRL21_ARATH RecName: Full=LEAF RUST 10 DISEASE-RESISTANCE LOCUS RECEPTOR-LIKE PROTEIN KINASE-like 2.1 {ECO:0000303|PubMed:12805585}; EC=2.7.11.1; AltName: Full=Probable receptor-like serine/threonine-protein kinase LRK10L-2.1 {ECO:0000305}; Flags: Precursor;	A0A8I6X2B1_HORVV RecName: Full=Non-specific serine/threonine protein kinase {ECO:0000256|ARBA:ARBA00012513}; EC=2.7.11.1 {ECO:0000256|ARBA:ARBA00012513};	Serine/threonine protein kinase	GO:0016021,integral component of membrane; GO:0005524,ATP binding; GO:0030247,polysaccharide binding; GO:0106310,protein serine kinase activity; GO:0004674,protein serine/threonine kinase activity; GO:0006468,protein phosphorylation; GO:0000166,nucleotide binding; GO:0003674,molecular_function; GO:0005488,binding; GO:0017076,purine nucleotide binding; GO:0030554,adenyl nucleotide binding; GO:0032…	Protein tyrosine and serine/threonine kinase	--	--	--
Cluster-81279.1	93.63	87.55	91.58	8.94	7.25	8.11	775	634	762	65	59	62	-3.45583	3.2703e-143	9.39223e-141	down	696	--	--	hypothetical protein L1887_51496 [Cichorium endivia]	--	A0A8J9WN29_9CHLO SubName: Full=Uncharacterized protein {ECO:0000313|EMBL:BDA43225.1};	--	--	Protein of unknown function (DUF3759)	--	--	--
Cluster-127967.2	18.34	18.64	18.82	45.66	45.11	46.18	864	761	861	1810	1924	1840	1.25157	1.23657e-142	3.52557e-140	up	3251	K00161 pyruvate dehydrogenase E1 component subunit alpha [EC:1.2.4.1] | (RefSeq) pyruvate dehydrogenase E1 component subunit alpha-2, mitochondrial (A)	ko00010: Glycolysis / Gluconeogenesis; ko00020: Citrate cycle (TCA cycle); ko00620: Pyruvate metabolism; ko00785: Lipoic acid metabolism; ko01100: Metabolic pathways; ko01110: Biosynthesis of secondary metabolites; ko01200: Carbon metabolism	pyruvate dehydrogenase E1 component subunit alpha-2, mitochondrial [Aegilops tauschii subsp. strangulata]	ODPA2_ORYSJ RecName: Full=Pyruvate dehydrogenase E1 component subunit alpha-2, mitochondrial; Short=PDHE1-A; EC=1.2.4.1; Flags: Precursor;	A0A453R8H1_AEGTS RecName: Full=Pyruvate dehydrogenase E1 component subunit alpha {ECO:0000256|RuleBase:RU361139}; EC=1.2.4.1 {ECO:0000256|RuleBase:RU361139};	Pyruvate dehydrogenase E1, alpha subunit	GO:0005759,mitochondrial matrix; GO:0004739,pyruvate dehydrogenase (acetyl-transferring) activity; GO:0006086,acetyl-CoA biosynthetic process from pyruvate; GO:0006096,glycolytic process; GO:0003674,molecular_function; GO:0003824,catalytic activity; GO:0004738,pyruvate dehydrogenase activity; GO:0016491,oxidoreductase activity; GO:0016624,oxidoreductase activity, acting on the aldehyde or oxo gro…	Dehydrogenase E1 component	--	--	--
Cluster-119567.0	2.67	2.48	2.87	26.52	28.16	22.44	94	84	106	948	1072	802	3.39712	1.562e-142	4.43726e-140	up	2087	--	--	--	--	--	--	--	--	--	--	--
Cluster-116416.0	11.94	11.9	13.27	47.54	46.03	48.61	349	301	377	1169	1213	1195	1.88821	2.18852e-142	6.19463e-140	up	1491	K05658 ATP-binding cassette, subfamily B (MDR/TAP), member 1 [EC:7.6.2.2] | (RefSeq) putative multidrug resistance protein isoform X1 (A)	ko02010: ABC transporters	zinc finger protein 1-like [Triticum dicoccoides]	ZFP1_WHEAT RecName: Full=Zinc finger protein 1; AltName: Full=WZF1;	B0ZYY8_WHEAT SubName: Full=Q-type C2H2 zinc finger protein {ECO:0000313|EMBL:ABZ80832.1, ECO:0000313|EnsemblPlants:TraesCS5A02G070600.1.cds1};	FOG: Zn-finger	GO:0005634,nucleus; GO:0003677,DNA binding; GO:0003700,DNA-binding transcription factor activity; GO:0046872,metal ion binding; GO:0003674,molecular_function; GO:0003676,nucleic acid binding; GO:0005488,binding; GO:0097159,organic cyclic compound binding; GO:1901363,heterocyclic compound binding; GO:0140110,transcription regulator activity; GO:0043167,ion binding; GO:0043169,cation binding; GO:00…	C2H2-type zinc finger	C2H2	TF	C2H2
Cluster-40176.11	58.1	55.62	56.81	13.22	14.2	11.14	1385	1150	1321	262	306	224	-2.19736	3.14217e-142	8.86192e-140	down	1264	K00128 aldehyde dehydrogenase (NAD+) [EC:1.2.1.3] | (RefSeq) aldehyde dehydrogenase family 2 member B7, mitochondrial (A)	ko00010: Glycolysis / Gluconeogenesis; ko00053: Ascorbate and aldarate metabolism; ko00071: Fatty acid degradation; ko00280: Valine, leucine and isoleucine degradation; ko00310: Lysine degradation; ko00330: Arginine and proline metabolism; ko00340: Histidine metabolism; ko00380: Tryptophan metabolism; ko00410: beta-Alanine metabolism; ko00561: Glycerolipid metabolism; ko00620: Pyruvate metabolism…	aldehyde dehydrogenase 2F1 [Syntrichia caninervis]	AL2B4_ARATH RecName: Full=Aldehyde dehydrogenase family 2 member B4, mitochondrial; Short=ALDH2a; EC=1.2.1.3; Flags: Precursor;	A0A2H4Z9T8_9BRYO SubName: Full=Aldehyde dehydrogenase 2F1 {ECO:0000313|EMBL:AUF72237.1};	Aldehyde dehydrogenase	GO:0005829,cytosol; GO:0005759,mitochondrial matrix; GO:0005739,mitochondrion; GO:0004029,aldehyde dehydrogenase (NAD+) activity; GO:0005524,ATP binding; GO:0043878,glyceraldehyde-3-phosphate dehydrogenase (NAD+) (non-phosphorylating) activity; GO:0003674,molecular_function; GO:0003824,catalytic activity; GO:0004030,aldehyde dehydrogenase [NAD(P)+] activity; GO:0016491,oxidoreductase activity; GO…	Aldehyde dehydrogenase family	--	--	--
Cluster-117608.4	7.76	6.86	7.22	30.27	29.71	30.11	343	256	300	1091	1146	1085	1.97444	7.61352e-142	2.12433e-139	up	2078	--	--	metallothionein-like protein type 2 [Aegilops tauschii subsp. strangulata]	MT1_COFAR RecName: Full=Metallothionein-like protein 1; Short=MT-1;	M8BG83_AEGTA SubName: Full=Metallothionein-like protein 4A {ECO:0000313|EMBL:EMT05738.1, ECO:0000313|EnsemblPlants:EMT05738};	Predicted metallothionein	GO:0046872,metal ion binding; GO:0003674,molecular_function; GO:0005488,binding; GO:0043167,ion binding; GO:0043169,cation binding	--	--	--	--
Cluster-93615.0	88.02	88.57	88.23	46.24	42.8	41.81	3922	3383	3809	1729	1704	1564	-1.06603	7.94015e-142	2.20762e-139	down	2096	K00423 L-ascorbate oxidase [EC:1.10.3.3] | (RefSeq) L-ascorbate oxidase-like (A)	ko00053: Ascorbate and aldarate metabolism; ko01100: Metabolic pathways	L-ascorbate oxidase-like [Triticum dicoccoides]	ASO_TOBAC RecName: Full=L-ascorbate oxidase; Short=ASO; Short=Ascorbase; EC=1.10.3.3; Flags: Precursor;	A0A3B6SMN4_WHEAT RecName: Full=L-ascorbate oxidase {ECO:0000256|ARBA:ARBA00022095}; EC=1.10.3.3 {ECO:0000256|ARBA:ARBA00012301};	Multicopper oxidases	GO:0005576,extracellular region; GO:0005507,copper ion binding; GO:0008447,L-ascorbate oxidase activity; GO:0016491,oxidoreductase activity; GO:0003674,molecular_function; GO:0005488,binding; GO:0043167,ion binding; GO:0043169,cation binding; GO:0046872,metal ion binding; GO:0046914,transition metal ion binding; GO:0003824,catalytic activity; GO:0016679,oxidoreductase activity, acting on diphenol…	Multicopper oxidase	--	--	--
Cluster-69263.0	29.82	34.7	29.91	105.24	110.32	113.33	548	552	534	1624	1828	1746	1.75245	5.1071e-141	1.41492e-138	up	1042	--	--	uncharacterized protein LOC119310804 [Triticum dicoccoides]	--	A0A453L3Z6_AEGTS SubName: Full=Uncharacterized protein {ECO:0000313|EnsemblPlants:AET5Gv20617400.1};	--	--	Proline-rich nuclear receptor coactivator motif	--	--	--
Cluster-110392.10	14.01	14.67	13.78	48.09	51.1	46.04	496	446	473	1427	1622	1370	1.72739	7.9945e-141	2.20707e-138	up	1810	K01369 legumain [EC:3.4.22.34] | (RefSeq) vacuolar-processing enzyme-like (A)	--	vacuolar-processing enzyme [Aegilops tauschii subsp. strangulata]	VPE_CITSI RecName: Full=Vacuolar-processing enzyme; Short=VPE; EC=3.4.22.-; Flags: Precursor;	A0A453KYE6_AEGTS SubName: Full=Uncharacterized protein {ECO:0000313|EnsemblPlants:AET5Gv20557200.4};	Asparaginyl peptidases	GO:0110165,cellular anatomical entity; GO:0004197,cysteine-type endopeptidase activity; GO:0051603,proteolysis involved in protein catabolic process; GO:0003674,molecular_function; GO:0003824,catalytic activity; GO:0004175,endopeptidase activity; GO:0008233,peptidase activity; GO:0008234,cysteine-type peptidase activity; GO:0016787,hydrolase activity; GO:0140096,catalytic activity, acting on a pr…	Peptidase C13 family	--	--	--
Cluster-118459.5	17.84	17.89	16.22	59.41	58.18	53.4	695	602	614	1948	2043	1752	1.67295	8.49319e-141	2.33652e-138	up	1865	K12795 suppressor of G2 allele of SKP1 | (RefSeq) protein SGT1 homolog (A)	ko04626: Plant-pathogen interaction	hypothetical protein MARPO_0077s0040 [Marchantia polymorpha]	GLPT4_ARATH RecName: Full=Putative glycerol-3-phosphate transporter 4; Short=G-3-P transporter 4; AltName: Full=Glycerol-3-phosphate permease 4; Short=AtG3Pp4; Short=G-3-P permease 4;	A0A2R6WLK7_MARPO RecName: Full=MFS domain-containing protein {ECO:0000259|PROSITE:PS50850};	Permease of the major facilitator superfamily	GO:0016021,integral component of membrane; GO:0000325,plant-type vacuole; GO:0061513,glucose 6-phosphate:inorganic phosphate antiporter activity; GO:0008643,carbohydrate transport; GO:0055062,phosphate ion homeostasis; GO:0003674,molecular_function; GO:0005215,transporter activity; GO:0005452,solute:inorganic anion antiporter activity; GO:0008509,anion transmembrane transporter activity; GO:00150…	Major Facilitator Superfamily	--	--	--
Cluster-91045.3	8.2	8.81	8.15	38.73	37.9	39.06	225	209	217	896	939	903	2.1584	1.70683e-140	4.67915e-138	up	1407	K08695 anthocyanidin reductase [EC:1.3.1.77] | (RefSeq) anthocyanidin reductase ((2S)-flavan-3-ol-forming)-like (A)	ko00941: Flavonoid biosynthesis; ko01100: Metabolic pathways; ko01110: Biosynthesis of secondary metabolites	anthocyanidin reductase ((2S)-flavan-3-ol-forming) isoform X1 [Aegilops tauschii subsp. strangulata]	ANRCS_VITVI RecName: Full=Anthocyanidin reductase ((2S)-flavan-3-ol-forming) {ECO:0000303|Ref.1}; Short=VvANR {ECO:0000303|Ref.1}; EC=1.3.1.112 {ECO:0000269|PubMed:20030585, ECO:0000269|Ref.1};	A0A453D2I4_AEGTS RecName: Full=Epimerase domain-containing protein {ECO:0000259|Pfam:PF01370};	Flavonol reductase/cinnamoyl-CoA reductase	GO:0033729,anthocyanidin reductase activity; GO:0050661,NADP binding; GO:0016854,racemase and epimerase activity; GO:0009813,flavonoid biosynthetic process; GO:0003674,molecular_function; GO:0003824,catalytic activity; GO:0016491,oxidoreductase activity; GO:0016627,oxidoreductase activity, acting on the CH-CH group of donors; GO:0016628,oxidoreductase activity, acting on the CH-CH group of donors…	NAD dependent epimerase/dehydratase family	--	--	--
Cluster-118177.0	24.09	22.33	23.62	5.18	5.06	4.06	1094	882	1076	186	191	156	-2.42891	2.0365e-140	5.56347e-138	down	2463	K11517 (S)-2-hydroxy-acid oxidase [EC:1.1.3.15] | (RefSeq) glycolate oxidase 1 (A)	ko00630: Glyoxylate and dicarboxylate metabolism; ko01100: Metabolic pathways; ko01110: Biosynthesis of secondary metabolites; ko01200: Carbon metabolism; ko04146: Peroxisome	hypothetical protein Lal_00003795 [Lupinus albus]	GLO5_ARATH RecName: Full=Glycolate oxidase 3; Short=GOX 3; EC=1.1.3.15 {ECO:0000250|UniProtKB:Q9LRR9}; AltName: Full=AtGLO5; AltName: Full=Peroxisomal (S)-2-hydroxy-acid oxidase GLO5; AltName: Full=Short chain alpha-hydroxy acid oxidase GLO5;	A0A6A5L2J7_LUPAL SubName: Full=Uncharacterized protein {ECO:0000313|EMBL:KAF1855206.1};	Glycolate oxidase	GO:0005777,peroxisome; GO:0003973,(S)-2-hydroxy-acid oxidase activity; GO:0010181,FMN binding; GO:0042742,defense response to bacterium; GO:0050665,hydrogen peroxide biosynthetic process; GO:0009854,oxidative photosynthetic carbon pathway; GO:0003674,molecular_function; GO:0003824,catalytic activity; GO:0016491,oxidoreductase activity; GO:0016614,oxidoreductase activity, acting on CH-OH group of …	FMN-dependent dehydrogenase	--	--	--
Cluster-118925.1	31.43	30.95	30.47	91.45	84.76	87.21	708	604	667	1733	1723	1651	1.45524	2.15385e-140	5.86362e-138	up	1209	--	--	uncharacterized protein LOC109736361 [Aegilops tauschii subsp. strangulata]	--	A0A453D7R3_AEGTS SubName: Full=Uncharacterized protein {ECO:0000313|EnsemblPlants:AET2Gv21121300.5};	--	--	--	--	--	--
Cluster-98340.2	86.74	80.52	80.23	15.24	19.06	15.13	1048	865	917	158	166	157	-2.46945	4.07141e-140	1.10456e-137	down	1008	K05350 beta-glucosidase [EC:3.2.1.21] | (RefSeq) receptor-like protein 2 isoform X1 (A)	ko00460: Cyanoamino acid metabolism; ko00500: Starch and sucrose metabolism; ko00999: Biosynthesis of various plant secondary metabolites; ko01100: Metabolic pathways; ko01110: Biosynthesis of secondary metabolites	phytosulfokine receptor 2 [Aegilops tauschii subsp. strangulata]	PSKR1_ARATH RecName: Full=Phytosulfokine receptor 1 {ECO:0000303|PubMed:16829587}; Short=AtPSKR1; EC=2.7.11.1 {ECO:0000269|PubMed:21504901}; EC=4.6.1.2 {ECO:0000269|PubMed:21504901}; AltName: Full=Guanylate cyclase {ECO:0000303|PubMed:21504901}; AltName: Full=Phytosulfokine LRR receptor kinase 1; AltName: Full=Protein serine-threonine kinase {ECO:0000303|PubMed:21504901}; Flags: Precursor;	A0A453MMW2_AEGTS RecName: Full=LRRNT_2 domain-containing protein {ECO:0000259|Pfam:PF08263};	--	GO:0016021,integral component of membrane; GO:0005886,plasma membrane; GO:0005524,ATP binding; GO:0004383,guanylate cyclase activity; GO:0001653,peptide receptor activity; GO:0004672,protein kinase activity; GO:0106310,protein serine kinase activity; GO:0004674,protein serine/threonine kinase activity; GO:0045087,innate immune response; GO:0006468,protein phosphorylation; GO:0031347,regulation of…	Leucine rich repeat	--	--	--
Cluster-112284.4	38.59	41.66	41.31	95.47	89.6	87.76	2261	2110	2353	4712	4731	4336	1.12066	1.29514e-138	3.45393e-136	up	2650	K24184 cytochrome P450 family 89 subfamily A [EC:1.14.-.-] | (RefSeq) cytochrome P450 89A2-like (A)	--	predicted protein [Hordeum vulgare subsp. vulgare]	C89A2_ARATH RecName: Full=Cytochrome P450 89A2; EC=1.14.-.-; AltName: Full=ATH 6-1; AltName: Full=CYPLXXXIX;	F2DZC3_HORVV SubName: Full=Predicted protein {ECO:0000313|EMBL:BAK00445.1};	Cytochrome P450 CYP2 subfamily	GO:0016021,integral component of membrane; GO:0016020,membrane; GO:0020037,heme binding; GO:0005506,iron ion binding; GO:0016709,oxidoreductase activity, acting on paired donors, with incorporation or reduction of molecular oxygen, NAD(P)H as one donor, and incorporation of one atom of oxygen; GO:0003674,molecular_function; GO:0005488,binding; GO:0046906,tetrapyrrole binding; GO:0097159,organic c…	Cytochrome P450	--	--	--
Cluster-114423.46	30.56	31.25	31.46	7.72	8.42	8.08	1116	987	1117	237	277	248	-1.99345	1.68408e-138	4.47594e-136	down	1768	K07375 tubulin beta | (RefSeq) LOW QUALITY PROTEIN: uncharacterized protein LOC116244723 (A)	ko04145: Phagosome; ko04814: Motor proteins	LOW QUALITY PROTEIN: uncharacterized protein LOC116244723 [Nymphaea colorata]	TBB_THAWE RecName: Full=Tubulin beta chain; AltName: Full=Beta-tubulin;	A0A7S3MIV5_9STRA RecName: Full=Tubulin beta chain {ECO:0000256|RuleBase:RU000352};	Beta tubulin	GO:0005737,cytoplasm; GO:0005874,microtubule; GO:0005525,GTP binding; GO:0005200,structural constituent of cytoskeleton; GO:0007017,microtubule-based process; GO:0000166,nucleotide binding; GO:0003674,molecular_function; GO:0005488,binding; GO:0017076,purine nucleotide binding; GO:0019001,guanyl nucleotide binding; GO:0032553,ribonucleotide binding; GO:0032555,purine ribonucleotide binding; GO:00…	Tubulin/FtsZ family, GTPase domain	--	--	--
Cluster-107144.1	181	196.57	202.48	58.73	64.61	62.19	1882	1757	2026	503	607	532	-1.70253	3.60323e-138	9.51217e-136	down	726	--	--	uncharacterized protein LOC120974362 [Aegilops tauschii subsp. strangulata]	--	A0A453ADE8_AEGTS SubName: Full=Uncharacterized protein {ECO:0000313|EnsemblPlants:AET2Gv20078900.7};	--	--	--	--	--	--
Cluster-73058.2	37.88	34.12	38.05	1.62	1.99	1.72	765	596	746	27	36	29	-4.42803	6.28953e-136	1.64927e-133	down	1115	K00002 alcohol dehydrogenase (NADP+) [EC:1.1.1.2] | (RefSeq) aldo-keto reductase family 4 member C9-like (A)	ko00010: Glycolysis / Gluconeogenesis; ko00040: Pentose and glucuronate interconversions; ko00053: Ascorbate and aldarate metabolism; ko00561: Glycerolipid metabolism; ko00620: Pyruvate metabolism; ko01100: Metabolic pathways; ko01110: Biosynthesis of secondary metabolites; ko01240: Biosynthesis of cofactors	D-galacturonate reductase-like [Quercus suber]	AKRCA_ARATH RecName: Full=Aldo-keto reductase family 4 member C10; EC=1.1.1.-;	A0A813A3Z0_9DINO SubName: Full=Akr1a1 protein {ECO:0000313|EMBL:CAE7853011.1};	Aldo/keto reductase family proteins	GO:0005829,cytosol; GO:0004032,alditol:NADP+ 1-oxidoreductase activity; GO:0003674,molecular_function; GO:0003824,catalytic activity; GO:0004033,aldo-keto reductase (NADP) activity; GO:0008106,alcohol dehydrogenase (NADP+) activity; GO:0016491,oxidoreductase activity; GO:0016614,oxidoreductase activity, acting on CH-OH group of donors; GO:0016616,oxidoreductase activity, acting on the CH-OH group…	Aldo/keto reductase family	--	--	--
Cluster-103368.4	91.29	88.38	93.62	16.97	17.19	17.49	881	778	918	144	153	137	-2.48334	1.11242e-135	2.90731e-133	down	964	--	--	hypothetical protein CFC21_085957 [Triticum aestivum]	--	A0A1D6B289_WHEAT RecName: Full=DUF5637 domain-containing protein {ECO:0000259|Pfam:PF18687};	--	--	Conotoxin	--	--	--
Cluster-88850.0	8.68	8.77	8.77	32.65	33.54	30.48	380	332	373	1203	1323	1124	1.8358	1.74619e-135	4.54852e-133	up	2057	K17987 next to BRCA1 gene 1 protein | (RefSeq) protein NBR1 homolog (A)	--	protein NBR1 homolog [Vigna unguiculata]	JOKA2_SOLTU RecName: Full=Protein JOKA2 {ECO:0000303|PubMed:26765567}; AltName: Full=Protein NBR1 homolog {ECO:0000305};	A0A7S3XS87_HETAK SubName: Full=Hypothetical protein {ECO:0000313|EMBL:CAE0630896.1};	Uncharacterized conserved protein	GO:0005776,autophagosome; GO:0031410,cytoplasmic vesicle; GO:0008270,zinc ion binding; GO:0006914,autophagy; GO:0050832,defense response to fungus; GO:0015031,protein transport; GO:0003674,molecular_function; GO:0005488,binding; GO:0043167,ion binding; GO:0043169,cation binding; GO:0046872,metal ion binding; GO:0046914,transition metal ion binding; GO:0008150,biological_process; GO:0008152,metabo…	Ig-like domain from next to BRCA1 gene	--	--	--
Cluster-126324.0	62.03	64.43	65.04	21.45	24.68	25.41	4180	3754	4175	1204	1505	1451	-1.45691	8.39986e-135	2.16642e-132	down	3097	K03231 elongation factor 1-alpha | (RefSeq) sulfate adenylyltransferase subunit 1 isoform X2 (A)	ko03013: Nucleocytoplasmic transport	peroxisomal biogenesis factor 6-like [Hordeum vulgare subsp. vulgare]	KTNA1_ARATH RecName: Full=Katanin p60 ATPase-containing subunit A1 {ECO:0000255|HAMAP-Rule:MF_03023}; Short=Katanin p60 subunit A1 {ECO:0000255|HAMAP-Rule:MF_03023}; EC=5.6.1.1 {ECO:0000255|HAMAP-Rule:MF_03023}; AltName: Full=CAD ATPase; AltName: Full=Katanin-1 {ECO:0000303|PubMed:11283338}; Short=AtKTN1 {ECO:0000303|PubMed:11283338}; AltName: Full=Katanin-like microtubule-severing protein {ECO:0…	A0A453A1A7_AEGTS RecName: Full=AAA domain-containing protein {ECO:0000259|SMART:SM00382};	AAA+-type ATPase	GO:0005737,cytoplasm; GO:0005874,microtubule; GO:0015630,microtubule cytoskeleton; GO:0005524,ATP binding; GO:0016887,ATP hydrolysis activity; GO:0016853,isomerase activity; GO:0008017,microtubule binding; GO:0008568,microtubule severing ATPase activity; GO:0043622,cortical microtubule organization; GO:0000226,microtubule cytoskeleton organization; GO:0051013,microtubule severing; GO:0009825,mult…	ATPase family associated with various cellular activities (AAA)	--	--	--
Cluster-80757.0	98.43	96.96	99.61	47.81	50.96	50.29	3129	2668	3097	1306	1488	1368	-1.00881	2.15743e-134	5.54601e-132	down	2315	K07025 putative hydrolase of the HAD superfamily | (RefSeq) uncharacterized protein LOC114292903 (A)	--	LOB domain-containing protein 39-like [Triticum dicoccoides]	LBD39_ARATH RecName: Full=LOB domain-containing protein 39; AltName: Full=ASYMMETRIC LEAVES 2-like protein 41; Short=AS2-like protein 41;	A0A446RUM6_TRITD RecName: Full=LOB domain-containing protein {ECO:0000259|PROSITE:PS50891};	--	GO:0010468,regulation of gene expression; GO:0008150,biological_process; GO:0008152,metabolic process; GO:0010467,gene expression; GO:0019222,regulation of metabolic process; GO:0043170,macromolecule metabolic process; GO:0050789,regulation of biological process; GO:0060255,regulation of macromolecule metabolic process; GO:0065007,biological regulation; GO:0071704,organic substance metabolic proc…	Ketopantoate hydroxymethyltransferase	LOB	TF	LOB
Cluster-68345.0	31.09	31.28	35.81	167.79	182.66	175.61	207	181	206	908	1101	910	2.38135	2.17952e-134	5.5845e-132	up	574	K10950 ERO1-like protein alpha [EC:1.8.4.-] | (RefSeq) endoplasmic reticulum oxidoreductin-2-like (A)	ko04141: Protein processing in endoplasmic reticulum	Dhn3, partial [Secale cereale]	DHN3_HORVU RecName: Full=Dehydrin DHN3; AltName: Full=B17;	F1DB88_SECCE SubName: Full=Dhn3 {ECO:0000313|EMBL:ADX32481.1}; Flags: Fragment;	--	GO:0009415,response to water; GO:0001101,response to acid chemical; GO:0008150,biological_process; GO:0009628,response to abiotic stimulus; GO:0010035,response to inorganic substance; GO:0042221,response to chemical; GO:0050896,response to stimulus; GO:1901700,response to oxygen-containing compound	Dehydrin	--	--	--
Cluster-141742.0	4.71	4.13	5.13	34.26	34.62	30.16	153	116	162	936	1013	824	2.77366	5.33887e-134	1.3635e-131	up	1606	K17500 integrin-linked kinase-associated serine/threonine phosphatase 2C [EC:3.1.3.16] | (RefSeq) WAT1-related protein At3g18200 isoform X1 (A)	--	WAT1-related protein At5g07050-like [Hordeum vulgare subsp. vulgare]	WTR38_ARATH RecName: Full=WAT1-related protein At5g07050;	F2E5U3_HORVV RecName: Full=WAT1-related protein {ECO:0000256|RuleBase:RU363077};	--	GO:0016021,integral component of membrane; GO:0005886,plasma membrane; GO:0022857,transmembrane transporter activity; GO:0003674,molecular_function; GO:0005215,transporter activity; GO:0005575,cellular_component; GO:0016020,membrane; GO:0031224,intrinsic component of membrane; GO:0110165,cellular anatomical entity; GO:0071944,cell periphery	EamA-like transporter family	--	--	--
Cluster-106101.0	27.73	27.74	26.68	64.29	67.08	67.89	999	874	922	1953	2208	2050	1.2376	9.37896e-134	2.3798e-131	up	2233	K16286 E3 ubiquitin-protein ligase EL5 [EC:2.3.2.27] | (RefSeq) E3 ubiquitin-protein ligase EL5-like (A)	--	RING-H2 finger protein ATL3 [Aegilops tauschii subsp. strangulata]	ATL3_ARATH RecName: Full=RING-H2 finger protein ATL3; EC=2.3.2.27 {ECO:0000305}; AltName: Full=RING-type E3 ubiquitin transferase ATL3 {ECO:0000305};	A0A453R0K6_AEGTS RecName: Full=RING-type domain-containing protein {ECO:0000259|PROSITE:PS50089};	FOG: Predicted E3 ubiquitin ligase	GO:0016021,integral component of membrane; GO:0046872,metal ion binding; GO:0016740,transferase activity; GO:0016567,protein ubiquitination; GO:0003674,molecular_function; GO:0005488,binding; GO:0043167,ion binding; GO:0043169,cation binding; GO:0003824,catalytic activity; GO:0006807,nitrogen compound metabolic process; GO:0008150,biological_process; GO:0008152,metabolic process; GO:0019538,prote…	Ring finger domain	--	--	--
Cluster-94072.0	82.25	82.13	80.66	34.81	35.56	37.66	2287	1967	2149	814	885	878	-1.22633	4.28073e-133	1.08268e-130	down	1419	K10355 actin, other eukaryote | (RefSeq) actin-7 (A)	ko04814: Motor proteins	actin-like [Dioscorea cayenensis subsp. rotundata]	ACT_ACHBI RecName: Full=Actin;	A0A835YQJ4_9STRA SubName: Full=Beta-actin {ECO:0000313|EMBL:KAG5178207.1};	Actin and related proteins	GO:0005737,cytoplasm; GO:0005856,cytoskeleton; GO:0005524,ATP binding; GO:0000166,nucleotide binding; GO:0003674,molecular_function; GO:0005488,binding; GO:0017076,purine nucleotide binding; GO:0030554,adenyl nucleotide binding; GO:0032553,ribonucleotide binding; GO:0032555,purine ribonucleotide binding; GO:0032559,adenyl ribonucleotide binding; GO:0035639,purine ribonucleoside triphosphate bindi…	Actin	--	--	--
Cluster-139527.6	6.69	8.53	5.25	93.5	109.34	91.46	63	70	52	756	936	725	3.78666	7.64783e-133	1.92806e-130	up	1287	--	--	hypothetical protein IEQ34_025520 [Dendrobium chrysotoxum]	RIC1_PHYIN RecName: Full=Protein Ric1;	A0A835Z2E7_9STRA SubName: Full=UPF0057 membrane protein T23F2.5 {ECO:0000313|EMBL:KAG5186287.1};	Stress responsive protein	GO:0016021,integral component of membrane; GO:0005575,cellular_component; GO:0016020,membrane; GO:0031224,intrinsic component of membrane; GO:0110165,cellular anatomical entity	--	--	--	--
Cluster-112196.2	14.41	14.44	13.1	41.82	41.62	44.48	618	536	546	1511	1609	1608	1.56228	2.51059e-132	6.30907e-130	up	2023	K07198 5'-AMP-activated protein kinase, catalytic alpha subunit [EC:2.7.11.11] | (RefSeq) CBL-interacting protein kinase 5-like (A)	--	CBL-interacting protein kinase 23 [Hordeum vulgare subsp. spontaneum]	CIPKN_ORYSJ RecName: Full=CBL-interacting protein kinase 23; EC=2.7.11.1; AltName: Full=OsCIPK23;	V9LSK7_WHEAT RecName: Full=Non-specific serine/threonine protein kinase {ECO:0000256|ARBA:ARBA00012513}; EC=2.7.11.1 {ECO:0000256|ARBA:ARBA00012513};	Serine/threonine protein kinase	GO:0005829,cytosol; GO:0005634,nucleus; GO:0005886,plasma membrane; GO:0005524,ATP binding; GO:0106310,protein serine kinase activity; GO:0004674,protein serine/threonine kinase activity; GO:0035556,intracellular signal transduction; GO:1990573,potassium ion import across plasma membrane; GO:0006468,protein phosphorylation; GO:0010119,regulation of stomatal movement; GO:0007584,response to nutrie…	Protein kinase domain	--	--	--
Cluster-91421.0	185.48	174.34	178.42	60.16	50.86	53.84	1669	1359	1557	452	412	402	-1.76733	5.37894e-132	1.3474e-129	down	667	--	--	--	--	--	--	--	--	--	--	--
Cluster-119211.5	26.15	24.77	27.08	99.09	101.68	95.2	343	282	345	1092	1205	1045	1.87152	5.43963e-132	1.35826e-129	up	833	--	--	ricin B-like lectin R40G3 [Hordeum vulgare subsp. vulgare]	40G3_ORYSJ RecName: Full=Ricin B-like lectin R40G3 {ECO:0000305}; AltName: Full=Osr40g3 {ECO:0000303|PubMed:9265787};	F2DWC8_HORVV SubName: Full=Predicted protein {ECO:0000313|EMBL:BAJ99399.1};	--	GO:0030246,carbohydrate binding; GO:0003674,molecular_function; GO:0005488,binding	Ricin-type beta-trefoil lectin domain-like	--	--	--
Cluster-17601.9	7.82	7.2	8.31	33.92	35.98	31.75	329	262	340	1204	1367	1127	2.07693	7.99839e-132	1.98454e-129	up	1993	--	--	hypothetical protein L1887_46579 [Cichorium endivia]	--	A0A2D4BX43_PYTIN RecName: Full=Nitric oxide dioxygenase {ECO:0000256|ARBA:ARBA00012229}; EC=1.14.12.17 {ECO:0000256|ARBA:ARBA00012229};	Globins and related hemoproteins	GO:0071949,FAD binding; GO:0020037,heme binding; GO:0046872,metal ion binding; GO:0008941,nitric oxide dioxygenase activity; GO:0019825,oxygen binding; GO:0005344,oxygen carrier activity; GO:0062197,cellular response to chemical stress; GO:0051409,response to nitrosative stress; GO:0000166,nucleotide binding; GO:0003674,molecular_function; GO:0005488,binding; GO:0036094,small molecule binding; GO…	Globin	--	--	--
Cluster-84000.0	39.43	38.94	40.91	80.89	83.96	85.85	1557	1330	1570	2689	2988	2855	1.02383	2.77333e-131	6.85939e-129	up	1889	K03327 multidrug resistance protein, MATE family | (RefSeq) protein DETOXIFICATION 21-like (A)	--	uncharacterized protein LOC125513824 [Triticum urartu]	--	A0A453P4L1_AEGTS SubName: Full=Uncharacterized protein {ECO:0000313|EnsemblPlants:AET6Gv20606700.2};	--	--	Senescence regulator	--	--	--
Cluster-37677.2	0.62	0.5	0.81	41.11	44	48.29	13	10	16	741	857	865	6.0679	3.7266e-130	9.13075e-128	up	1228	K01184 polygalacturonase [EC:3.2.1.15] | (RefSeq) probablLMTDHIATEVGRYQGRLATWDVVNEPFNEDGTYRQTLWYNGLGA	ko00040: Pentose and glucuronate interconversions; ko01100: Metabolic pathways	A psychrophilic glycoside hydrolase family 10 endo-beta-1,4-xylanase [Aegilops speltoides subsp. speltoides]	XYN5L_ARATH RecName: Full=Endo-1,4-beta-xylanase 5-like {ECO:0000305}; Short=AtXyn5-like {ECO:0000305}; Short=Xylan endohydrolase 5-like {ECO:0000305}; Short=Xylanase 5-like {ECO:0000305}; EC=3.2.1.8 {ECO:0000255|PROSITE-ProRule:PRU01096}; Flags: Precursor;	G5A118_PHYSP SubName: Full=Putative glycosyl hydrolase family 10 protein {ECO:0000313|EMBL:EGZ11450.1};	--	GO:0031176,endo-1,4-beta-xylanase activity; GO:0045493,xylan catabolic process; GO:0003674,molecular_function; GO:0003824,catalytic activity; GO:0004553,hydrolase activity, hydrolyzing O-glycosyl compounds; GO:0016787,hydrolase activity; GO:0016798,hydrolase activity, acting on glycosyl bonds; GO:0097599,xylanase activity; GO:0000272,polysaccharide catabolic process; GO:0005975,carbohydrate metab…	Glycosyl hydrolase family 10	--	--	--
Cluster-88879.0	23.79	24.04	21.84	1.42	2.36	1.97	818	715	730	41	73	57	-3.64307	1.04282e-128	2.49275e-126	down	1682	K12795 suppressor of G2 allele of SKP1 | (RefSeq) protein SGT1 homolog (A)	ko04626: Plant-pathogen interaction	uncharacterized transporter C1002.16c-like [Quercus suber]	--	A0A5N6KQT1_9ROSI RecName: Full=MFS domain-containing protein {ECO:0000259|PROSITE:PS50850};	Permease of the major facilitator superfamily	GO:0016021,integral component of membrane; GO:0022857,transmembrane transporter activity; GO:0003674,molecular_function; GO:0005215,transporter activity; GO:0005575,cellular_component; GO:0016020,membrane; GO:0031224,intrinsic component of membrane; GO:0110165,cellular anatomical entity	Major Facilitator Superfamily	--	--	--
Cluster-22512.2	3.73	1.93	1.56	36.86	28.2	22.2	42	51	46	595	645	559	3.77727	1.06634e-128	2.54124e-126	up	1695	K00128 aldehyde dehydrogenase (NAD+) [EC:1.2.1.3] | (RefSeq) aldehyde dehydrogenase (A)	ko00010: Glycolysis / Gluconeogenesis; ko00053: Ascorbate and aldarate metabolism; ko00071: Fatty acid degradation; ko00280: Valine, leucine and isoleucine degradation; ko00310: Lysine degradation; ko00330: Arginine and proline metabolism; ko00340: Histidine metabolism; ko00380: Tryptophan metabolism; ko00410: beta-Alanine metabolism; ko00561: Glycerolipid metabolism; ko00620: Pyruvate metabolism…	hypothetical protein FH972_022256 [Carpinus fangiana]	AL2B7_ARATH RecName: Full=Aldehyde dehydrogenase family 2 member B7, mitochondrial; Short=ALDH2b; EC=1.2.1.3; Flags: Precursor;	A0A5N6KS89_9ROSI RecName: Full=Aldedh domain-containing protein {ECO:0000259|Pfam:PF00171};	Aldehyde dehydrogenase	GO:0005759,mitochondrial matrix; GO:0005634,nucleus; GO:0004029,aldehyde dehydrogenase (NAD+) activity; GO:0043878,glyceraldehyde-3-phosphate dehydrogenase (NAD+) (non-phosphorylating) activity; GO:0003674,molecular_function; GO:0003824,catalytic activity; GO:0004030,aldehyde dehydrogenase [NAD(P)+] activity; GO:0016491,oxidoreductase activity; GO:0016620,oxidoreductase activity, acting on the al…	Aldehyde dehydrogenase family	--	--	--
Cluster-102380.10	1.61	2.16	2.17	22.57	22.77	19.86	62	72	81	736	795	648	3.42413	1.19608e-128	2.84178e-126	up	1857	K08139 MFS transporter, SP family, sugar:H+ symporter | (RefSeq) high-affinity glucose transporter ght2-like (A)	--	hypothetical protein FH972_025605 [Carpinus fangiana]	STP6_ARATH RecName: Full=Sugar transport protein 6; AltName: Full=Hexose transporter 6;	A0A5N6L236_9ROSI RecName: Full=MFS domain-containing protein {ECO:0000259|PROSITE:PS50850};	Predicted transporter (major facilitator superfamily)	GO:0016021,integral component of membrane; GO:0015145,monosaccharide transmembrane transporter activity; GO:0015293,symporter activity; GO:0034219,carbohydrate transmembrane transport; GO:0003674,molecular_function; GO:0005215,transporter activity; GO:0015144,carbohydrate transmembrane transporter activity; GO:0022857,transmembrane transporter activity; GO:0051119,sugar transmembrane transporter …	Sugar (and other) transporter	--	--	--
Cluster-91059.3	7.17	8.57	8.57	41.69	41.76	37.51	234	242	272	1147	1231	1032	2.272	2.2886e-128	5.42107e-126	up	1615	K09753 cinnamoyl-CoA reductase [EC:1.2.1.44] | (RefSeq) cinnamoyl-CoA reductase 1-like (A)	ko00940: Phenylpropanoid biosynthesis; ko01100: Metabolic pathways; ko01110: Biosynthesis of secondary metabolites	cinnamoyl-CoA reductase 1 [Aegilops tauschii subsp. strangulata]	CCR1_PETHY RecName: Full=Cinnamoyl-CoA reductase 1 {ECO:0000303|PubMed:24985707, ECO:0000303|PubMed:25217505}; Short=PhCCR1 {ECO:0000303|PubMed:24985707, ECO:0000303|PubMed:25217505}; EC=1.2.1.44 {ECO:0000250|UniProtKB:Q9S9N9}; AltName: Full=Coniferylaldehyde synthase {ECO:0000305}; EC=1.2.1.- {ECO:0000269|PubMed:24985707, ECO:0000269|PubMed:25217505};	A0A453KXC0_AEGTS RecName: Full=Epimerase domain-containing protein {ECO:0000259|Pfam:PF01370};	Flavonol reductase/cinnamoyl-CoA reductase	GO:0005737,cytoplasm; GO:0016621,cinnamoyl-CoA reductase activity; GO:0000166,nucleotide binding; GO:0007623,circadian rhythm; GO:0010597,green leaf volatile biosynthetic process; GO:0009809,lignin biosynthetic process; GO:0009699,phenylpropanoid biosynthetic process; GO:0003674,molecular_function; GO:0003824,catalytic activity; GO:0016491,oxidoreductase activity; GO:0016620,oxidoreductase activi…	NAD dependent epimerase/dehydratase family	--	--	--
Cluster-39907.13	263.67	266.65	263.96	123.95	134.09	128.55	2606	2221	2547	1020	1180	1059	-1.09156	3.24175e-128	7.6557e-126	down	753	--	--	--	--	--	--	--	--	--	--	--
Cluster-56650.1	44.64	44.55	41.96	96.7	100.21	96.15	1267	1096	1159	2304	2558	2287	1.10702	4.41269e-128	1.03897e-125	up	1444	K03676 glutaredoxin 3 | (RefSeq) glutaredoxin-C9 (A)	--	monothiol glutaredoxin-S9-like [Triticum dicoccoides]	GRXS9_ORYSJ RecName: Full=Monothiol glutaredoxin-S9;	A0A452ZWK8_AEGTS RecName: Full=Glutaredoxin domain-containing protein {ECO:0000259|Pfam:PF00462};	Glutaredoxin and related proteins	GO:0005737,cytoplasm; GO:0005634,nucleus; GO:0051537,2 iron, 2 sulfur cluster binding; GO:0097573,glutathione oxidoreductase activity; GO:0046872,metal ion binding; GO:0003674,molecular_function; GO:0005488,binding; GO:0051536,iron-sulfur cluster binding; GO:0051540,metal cluster binding; GO:0003824,catalytic activity; GO:0015035,protein-disulfide reductase activity; GO:0015036,disulfide oxidored…	Glutaredoxin	--	--	--
Cluster-81418.8	4.66	2.71	5.5	146.11	147.93	117.82	33	17	38	880	965	690	4.93763	2.46908e-127	5.79605e-125	up	596	--	--	--	--	--	--	--	--	--	--	--
Cluster-90337.6	51.4	53.88	44.86	237.49	246.38	223.43	338	304	288	1220	1398	1150	2.10174	2.80669e-127	6.56891e-125	up	642	--	--	--	--	--	--	--	--	--	--	--
Cluster-96690.2	5.8	5.04	6.32	38.72	32.07	35.67	104	114	112	818	771	741	2.9048	9.44356e-127	2.20364e-124	up	1403	--	--	--	--	--	--	--	Terpene synthase family 2, C-terminal metal binding	--	--	--
Cluster-132364.0	128.57	127.62	147.64	62.03	60.9	52.6	3498	2947	3366	1484	1480	1318	-1.1085	2.67532e-126	6.22428e-124	down	1510	--	--	non-specific lipid transfer protein-like 1 [Hordeum vulgare subsp. vulgare]	NLTL1_ORYSJ RecName: Full=Non-specific lipid transfer protein-like 1; Short=OsLTPL1; Flags: Precursor;	A0A8I6WLM1_HORVV RecName: Full=AAI domain-containing protein {ECO:0000259|SMART:SM00499};	--	GO:0032578,aleurone grain membrane; GO:0031225,anchored component of membrane; GO:0005773,vacuole; GO:0008289,lipid binding; GO:0008233,peptidase activity; GO:0006508,proteolysis; GO:0003674,molecular_function; GO:0005488,binding; GO:0003824,catalytic activity; GO:0016787,hydrolase activity; GO:0140096,catalytic activity, acting on a protein; GO:0006807,nitrogen compound metabolic process; GO:000…	Probable lipid transfer	--	--	--
Cluster-54225.0	51.61	54.48	54.39	110.62	107.75	115.44	1728	1578	1770	3117	3252	3253	1.00913	7.32914e-126	1.70012e-123	up	1646	--	--	uncharacterized protein LOC109747639 [Aegilops tauschii subsp. strangulata]	--	A0A453KXX0_AEGTS SubName: Full=Uncharacterized protein {ECO:0000313|EnsemblPlants:AET5Gv20552900.1};	--	GO:0016021,integral component of membrane; GO:0005575,cellular_component; GO:0016020,membrane; GO:0031224,intrinsic component of membrane; GO:0110165,cellular anatomical entity	Family of unknown function (DUF716)	--	--	--
Cluster-60240.0	16.7	18.55	17.19	61.98	57.16	61.97	411	395	411	1282	1268	1281	1.74045	1.03034e-124	2.35521e-122	up	1291	K12581 CCR4-NOT transcription complex subunit 7/8 | (RefSeq) probable CCR4-associated factor 1 homolog 11 (A)	ko03018: RNA degradation	probable CCR4-associated factor 1 homolog 11 [Hordeum vulgare subsp. vulgare]	CAF1K_ARATH RecName: Full=Probable CCR4-associated factor 1 homolog 11; EC=3.1.13.4;	F2DRK3_HORVV RecName: Full=Poly(A)-specific ribonuclease {ECO:0000256|ARBA:ARBA00012161}; EC=3.1.13.4 {ECO:0000256|ARBA:ARBA00012161};	mRNA deadenylase subunit	GO:0030015,CCR4-NOT core complex; GO:0005634,nucleus; GO:0000932,P-body; GO:0008408,3'-5' exonuclease activity; GO:0046872,metal ion binding; GO:0004535,poly(A)-specific ribonuclease activity; GO:0003723,RNA binding; GO:0042742,defense response to bacterium; GO:0043928,exonucleolytic catabolism of deadenylated mRNA; GO:0000289,nuclear-transcribed mRNA poly(A) tail shortening; GO:0003674,molecular…	CAF1 family ribonuclease	--	--	--
Cluster-101809.9	1.57	2.93	1.54	42.83	48.52	41.82	30	49	29	700	852	683	4.44722	1.15632e-124	2.63551e-122	up	1086	K03809 NAD(P)H dehydrogenase (quinone) [EC:1.6.5.2] | (RefSeq) quinone-oxidoreductase QR2-like (A)	ko00130: Ubiquinone and other terpenoid-quinone biosynthesis; ko01100: Metabolic pathways; ko01110: Biosynthesis of secondary metabolites; ko01240: Biosynthesis of cofactors	quinone-oxidoreductase QR2-like [Triticum urartu]	QR2_TRIVS RecName: Full=Quinone-oxidoreductase QR2 {ECO:0000303|PubMed:11260494}; Short=TvQR2 {ECO:0000303|PubMed:11260494}; EC=1.6.5.2 {ECO:0000269|Ref.2};	A0A453BQJ4_AEGTS RecName: Full=NAD(P)H dehydrogenase (quinone) {ECO:0000256|ARBA:ARBA00012648}; EC=1.6.5.2 {ECO:0000256|ARBA:ARBA00012648};	1,4-benzoquinone reductase-like; Trp repressor binding protein-like/protoplast-secreted protein	GO:0010181,FMN binding; GO:0050136,NADH dehydrogenase (quinone) activity; GO:0008753,NADPH dehydrogenase (quinone) activity; GO:0000166,nucleotide binding; GO:0003674,molecular_function; GO:0005488,binding; GO:0032553,ribonucleotide binding; GO:0036094,small molecule binding; GO:0043167,ion binding; GO:0043168,anion binding; GO:0097159,organic cyclic compound binding; GO:0097367,carbohydrate deri…	NADPH-dependent FMN reductase	--	--	--
Cluster-117707.2	15.5	12.71	14.34	216.23	193.71	189.9	55	39	50	645	631	556	3.75809	1.86598e-124	4.24065e-122	up	460	--	--	--	--	--	--	--	--	--	--	--
Cluster-117765.0	129.89	134.02	130.78	54.43	49.81	58.75	2861	2554	2799	1007	989	1086	-1.32691	8.29278e-124	1.87918e-121	down	1188	K00384 thioredoxin reductase (NADPH) [EC:1.8.1.9] | (RefSeq) thioredoxin reductase 1-like (A)	ko00450: Selenocompound metabolism	germin-like protein 4-1 [Hordeum vulgare subsp. vulgare]	GL41_ORYSJ RecName: Full=Germin-like protein 4-1; Flags: Precursor;	A0A8I6XPX2_HORVV RecName: Full=Germin-like protein {ECO:0000256|RuleBase:RU366015};	--	GO:0048046,apoplast; GO:0030145,manganese ion binding; GO:0003674,molecular_function; GO:0005488,binding; GO:0043167,ion binding; GO:0043169,cation binding; GO:0046872,metal ion binding; GO:0046914,transition metal ion binding; GO:0005575,cellular_component; GO:0005576,extracellular region; GO:0110165,cellular anatomical entity	Cupin	--	--	--
Cluster-106340.1	288.47	275.71	276.64	133.32	118.15	131.62	3037	2516	2828	1174	1122	1154	-1.19158	1.45136e-122	3.26994e-120	down	759	K19891 glucan endo-1,3-beta-glucosidase 1/2/3 [EC:3.2.1.39] | (RefSeq) hypothetical protein (A)	ko00500: Starch and sucrose metabolism; ko01100: Metabolic pathways	hypothetical protein CFC21_022988 [Triticum aestivum]	E1312_ARATH RecName: Full=Glucan endo-1,3-beta-glucosidase 12; EC=3.2.1.39; AltName: Full=(1->3)-beta-glucan endohydrolase 12; Short=(1->3)-beta-glucanase 12; AltName: Full=Beta-1,3-endoglucanase 12; Short=Beta-1,3-glucanase 12; Flags: Precursor;	A0A3B6C6Q4_WHEAT RecName: Full=X8 domain-containing protein {ECO:0000259|SMART:SM00768};	--	GO:0031225,anchored component of membrane; GO:0046658,anchored component of plasma membrane; GO:0005576,extracellular region; GO:0042973,glucan endo-1,3-beta-D-glucosidase activity; GO:0005975,carbohydrate metabolic process; GO:0071555,cell wall organization; GO:0006952,defense response; GO:0003674,molecular_function; GO:0003824,catalytic activity; GO:0004553,hydrolase activity, hydrolyzing O-gly…	Glycosyl hydrolases family 17	--	--	--
Cluster-78400.4	88.29	86.97	88.69	42.13	42.64	45.74	2664	2271	2601	1069	1160	1161	-1.06516	7.83308e-122	1.75472e-119	down	1514	K10999 cellulose synthase A [EC:2.4.1.12] | (RefSeq) cellulose synthase A catalytic subunit 7 [UDP-forming] (A)	--	putative cellulose synthase catalytic subunit, partial [Hordeum vulgare]	CESA7_ORYSJ RecName: Full=Cellulose synthase A catalytic subunit 7 [UDP-forming]; EC=2.4.1.12; AltName: Full=OsCesA7;	A0A452YD82_AEGTS SubName: Full=Uncharacterized protein {ECO:0000313|EnsemblPlants:AET1Gv20379600.33};	--	GO:0016021,integral component of membrane; GO:0005886,plasma membrane; GO:0016760,cellulose synthase (UDP-forming) activity; GO:0016759,cellulose synthase activity; GO:0046872,metal ion binding; GO:0071555,cell wall organization; GO:0030244,cellulose biosynthetic process; GO:0009833,plant-type primary cell wall biogenesis; GO:0009834,plant-type secondary cell wall biogenesis; GO:0003674,molecular…	Cellulose synthase	--	--	--
Cluster-102380.5	5.42	6.25	5.51	29.91	34.08	29.27	205	204	203	953	1163	933	2.39809	1.77446e-121	3.96371e-119	up	1822	K08139 MFS transporter, SP family, sugar:H+ symporter | (RefSeq) high-affinity glucose transporter ght2-like (A)	--	hypothetical protein FH972_025605 [Carpinus fangiana]	STP6_ARATH RecName: Full=Sugar transport protein 6; AltName: Full=Hexose transporter 6;	A0A5N6L236_9ROSI RecName: Full=MFS domain-containing protein {ECO:0000259|PROSITE:PS50850};	Predicted transporter (major facilitator superfamily)	GO:0016021,integral component of membrane; GO:0015145,monosaccharide transmembrane transporter activity; GO:0015293,symporter activity; GO:0034219,carbohydrate transmembrane transport; GO:0003674,molecular_function; GO:0005215,transporter activity; GO:0015144,carbohydrate transmembrane transporter activity; GO:0022857,transmembrane transporter activity; GO:0051119,sugar transmembrane transporter …	Sugar (and other) transporter	--	--	--
Cluster-12902.4	14.77	13.72	14.99	48.33	50.16	46.78	504	393	498	1409	1590	1334	1.72268	2.34222e-121	5.2171e-119	up	1850	K24193 MFS transporter, SP family, sugar:H+ symporter | (RefSeq) sugar transport protein 10-like (A)	--	hypothetical protein FH972_023814 [Carpinus fangiana]	PLT4_ARATH RecName: Full=Probable polyol transporter 4;	A0A5N6KWA3_9ROSI RecName: Full=MFS domain-containing protein {ECO:0000259|PROSITE:PS50850};	Predicted transporter (major facilitator superfamily)	GO:0016021,integral component of membrane; GO:0005351,carbohydrate:proton symporter activity; GO:0003674,molecular_function; GO:0005215,transporter activity; GO:0005402,carbohydrate:cation symporter activity; GO:0008324,cation transmembrane transporter activity; GO:0015075,ion transmembrane transporter activity; GO:0015078,proton transmembrane transporter activity; GO:0015144,carbohydrate transme…	Sugar (and other) transporter	--	--	--
Cluster-140033.1	0.92	0.35	0.45	20.65	24.3	21.47	33	13	17	627	806	650	5.1348	7.72317e-120	1.70573e-117	up	2023	K24193 MFS transporter, SP family, sugar:H+ symporter | (RefSeq) sugar transport protein 10-like (A)	--	hypothetical protein [Adiantum nelumboides]	PLT6_ARATH RecName: Full=Probable polyol transporter 6;	A0A1D1Z372_9ARAE SubName: Full=High-affinity glucose transporter {ECO:0000313|EMBL:JAT61299.1}; Flags: Fragment;	Predicted transporter (major facilitator superfamily)	GO:0016021,integral component of membrane; GO:0005351,carbohydrate:proton symporter activity; GO:0003674,molecular_function; GO:0005215,transporter activity; GO:0005402,carbohydrate:cation symporter activity; GO:0008324,cation transmembrane transporter activity; GO:0015075,ion transmembrane transporter activity; GO:0015078,proton transmembrane transporter activity; GO:0015144,carbohydrate transme…	Sugar (and other) transporter	--	--	--
Cluster-33890.13	26.4	22.51	27.18	70.2	74.54	76.46	1649	1216	1651	3696	4198	4030	1.49226	1.59391e-119	3.51041e-117	up	2806	K01188 beta-glucosidase [EC:3.2.1.21] | (RefSeq) beta-glucosidase 6 (A)	ko00460: Cyanoamino acid metabolism; ko00500: Starch and sucrose metabolism; ko00999: Biosynthesis of various plant secondary metabolites; ko01100: Metabolic pathways; ko01110: Biosynthesis of secondary metabolites	beta-glucosidase 6 [Triticum urartu]	BGL06_ORYSJ RecName: Full=Beta-glucosidase 6 {ECO:0000305}; Short=Os3bglu6 {ECO:0000303|PubMed:17196101}; EC=3.2.1.21 {ECO:0000269|PubMed:19587102}; Flags: Precursor;	A0A446SBG2_TRITD RecName: Full=4-hydroxy-7-methoxy-3-oxo-3,4-dihydro-2H-1,4-benzoxazin-2-yl glucosidebeta-D-glucosidase {ECO:0000256|ARBA:ARBA00012857}; EC=3.2.1.182 {ECO:0000256|ARBA:ARBA00012857};	Beta-glucosidase, lactase phlorizinhydrolase, and related proteins	GO:0005576,extracellular region; GO:0033907,beta-D-fucosidase activity; GO:0004565,beta-galactosidase activity; GO:0080083,beta-gentiobiose beta-glucosidase activity; GO:0008422,beta-glucosidase activity; GO:0080079,cellobiose glucosidase activity; GO:0042973,glucan endo-1,3-beta-D-glucosidase activity; GO:0016798,hydrolase activity, acting on glycosyl bonds; GO:0102483,scopolin beta-glucosidase …	Glycosyl hydrolase family 1	--	--	--
Cluster-121449.6	3.76	3.69	4.46	38.47	42.33	34.31	86	73	99	744	878	663	3.23164	1.11758e-118	2.45445e-116	up	1228	--	--	--	--	--	--	--	--	--	--	--
Cluster-94229.2	37.71	38.87	35.78	4.36	4.08	4.23	651	576	602	61	63	60	-3.22766	1.32219e-118	2.8957e-116	down	1002	K15919 glyoxylate/hydroxypyruvate reductase [EC:1.1.1.79 1.1.1.81] | (RefSeq) glyoxylate/hydroxypyruvate reductase HPR3-like (A)	ko00260: Glycine, serine and threonine metabolism; ko00630: Glyoxylate and dicarboxylate metabolism; ko01100: Metabolic pathways; ko01110: Biosynthesis of secondary metabolites; ko01200: Carbon metabolism	hypothetical protein Lal_00037203 [Lupinus albus]	HPR3_ARATH RecName: Full=Glyoxylate/hydroxypyruvate reductase HPR3; EC=1.1.1.79 {ECO:0000305|PubMed:21205613}; EC=1.1.1.81 {ECO:0000305|PubMed:21205613}; AltName: Full=NAD(P)H-dependent hydroxypyruvate reductase 3; Short=AtHPR3; Short=HPR 3;	I0ZAP5_COCSC SubName: Full=Uncharacterized protein {ECO:0000313|EMBL:EIE27714.1};	Glyoxylate/hydroxypyruvate reductase (D-isomer-specific 2-hydroxy acid dehydrogenase superfamily)	GO:0030267,glyoxylate reductase (NADP+) activity; GO:0016618,hydroxypyruvate reductase activity; GO:0051287,NAD binding; GO:0009854,oxidative photosynthetic carbon pathway; GO:0009853,photorespiration; GO:0003674,molecular_function; GO:0003824,catalytic activity; GO:0016491,oxidoreductase activity; GO:0016614,oxidoreductase activity, acting on CH-OH group of donors; GO:0016616,oxidoreductase acti…	D-isomer specific 2-hydroxyacid dehydrogenase, NAD binding domain	--	--	--
Cluster-83936.4	22.68	26.31	25.89	1.44	0.81	0.75	673	676	747	35	21	18	-4.73977	1.94225e-118	4.24184e-116	down	1496	K00008 L-iditol 2-dehydrogenase [EC:1.1.1.14] | (RefSeq) NAD-dependent sorbitol dehydrogenase (A)	ko00040: Pentose and glucuronate interconversions; ko00051: Fructose and mannose metabolism; ko01100: Metabolic pathways	sorbitol dehydrogenase-like [Quercus suber]	DHSO_ARATH RecName: Full=Sorbitol dehydrogenase {ECO:0000303|PubMed:23498864}; Short=SDH {ECO:0000303|PubMed:23498864}; EC=1.1.1.- {ECO:0000269|PubMed:23498864}; AltName: Full=Polyol dehydrogenase {ECO:0000305|PubMed:23498864}; AltName: Full=Ribitol dehydrogenase {ECO:0000303|PubMed:23498864}; Short=RDH {ECO:0000303|PubMed:23498864}; EC=1.1.1.56 {ECO:0000269|PubMed:23498864}; AltName: Full=Xylito…	A0A7S0ZIU3_9RHOD SubName: Full=Hypothetical protein {ECO:0000313|EMBL:CAD8823089.1};	Sorbitol dehydrogenase	GO:0005737,cytoplasm; GO:0005829,cytosol; GO:0031966,mitochondrial membrane; GO:0005886,plasma membrane; GO:0009506,plasmodesma; GO:0009536,plastid; GO:0046526,D-xylulose reductase activity; GO:0003939,L-iditol 2-dehydrogenase activity; GO:0050255,ribitol 2-dehydrogenase activity; GO:0009010,sorbitol-6-phosphate 2-dehydrogenase activity; GO:0008270,zinc ion binding; GO:0006060,sorbitol metabolic …	Alcohol dehydrogenase GroES-like domain	--	--	--
Cluster-132126.0	21.98	20.8	19.17	3.09	3.56	3.86	848	714	739	112	129	124	-2.57002	1.96087e-116	4.20061e-114	down	2071	K22464 fatty acid photodecarboxylase [EC:4.1.1.106] | (RefSeq) uncharacterized protein (A)	--	hypothetical protein AA0115_g10932 [Alternaria tenuissima]	FAP_CHLRE RecName: Full=Fatty acid photodecarboxylase, chloroplastic {ECO:0000303|PubMed:28860382}; Short=CrFAP {ECO:0000303|PubMed:28860382}; EC=4.1.1.106 {ECO:0000269|PubMed:28860382}; Flags: Precursor;	F2E063_HORVV SubName: Full=Predicted protein {ECO:0000313|EMBL:BAK00735.1};	Glucose dehydrogenase/choline dehydrogenase/mandelonitrile lyase (GMC oxidoreductase family)	GO:0009507,chloroplast; GO:0016020,membrane; GO:0008812,choline dehydrogenase activity; GO:0050660,flavin adenine dinucleotide binding; GO:0016829,lyase activity; GO:0016491,oxidoreductase activity; GO:0019285,glycine betaine biosynthetic process from choline; GO:0003674,molecular_function; GO:0003824,catalytic activity; GO:0016614,oxidoreductase activity, acting on CH-OH group of donors; GO:0000…	GMC oxidoreductase	--	--	--
Cluster-23244.4	23.97	22.62	25.81	106.9	108.78	99.44	294	268	307	1148	1208	997	2.03327	1.16817e-115	2.48212e-113	up	859	K00384 thioredoxin reductase (NADPH) [EC:1.8.1.9] | (RefSeq) thioredoxin reductase 1-like (A)	ko00450: Selenocompound metabolism	germin-like protein 8-8 [Triticum dicoccoides]	GL811_ORYSJ RecName: Full=Germin-like protein 8-11; Flags: Precursor;	A0A453DPC0_AEGTS RecName: Full=Germin-like protein {ECO:0000256|RuleBase:RU366015};	--	GO:0048046,apoplast; GO:0030145,manganese ion binding; GO:0003674,molecular_function; GO:0005488,binding; GO:0043167,ion binding; GO:0043169,cation binding; GO:0046872,metal ion binding; GO:0046914,transition metal ion binding; GO:0005575,cellular_component; GO:0005576,extracellular region; GO:0110165,cellular anatomical entity	Cupin	--	--	--
Cluster-132589.9	167.24	178.9	178.12	76.16	71.64	71.43	1889	1751	1953	720	730	673	-1.31207	2.73095e-114	5.77144e-112	down	759	K19891 glucan endo-1,3-beta-glucosidase 1/2/3 [EC:3.2.1.39] | (RefSeq) glucan endo-1,3-beta-glucosidase 2-like (A)	ko00500: Starch and sucrose metabolism; ko01100: Metabolic pathways	glucan endo-1,3-beta-glucosidase 13-like [Triticum dicoccoides]	E137_ARATH RecName: Full=Glucan endo-1,3-beta-glucosidase 7; EC=3.2.1.39; AltName: Full=(1->3)-beta-glucan endohydrolase 7; Short=(1->3)-beta-glucanase 7; AltName: Full=Beta-1,3-endoglucanase 7; Short=Beta-1,3-glucanase 7; Flags: Precursor;	A0A453A1B4_AEGTS RecName: Full=X8 domain-containing protein {ECO:0000259|SMART:SM00768};	--	GO:0046658,anchored component of plasma membrane; GO:0005576,extracellular region; GO:0042973,glucan endo-1,3-beta-D-glucosidase activity; GO:0005975,carbohydrate metabolic process; GO:0071555,cell wall organization; GO:0003674,molecular_function; GO:0003824,catalytic activity; GO:0004553,hydrolase activity, hydrolyzing O-glycosyl compounds; GO:0008422,beta-glucosidase activity; GO:0015926,glucos…	Glycosyl hydrolases family 17	--	--	--
Cluster-69521.0	67.05	68.11	69.88	150.16	137.15	136.5	1016	869	980	1892	1991	1827	1.08179	6.03495e-114	1.27196e-111	up	1190	--	--	uncharacterized protein LOC119278198 [Triticum dicoccoides]	--	A0A453GCX7_AEGTS SubName: Full=Uncharacterized protein {ECO:0000313|EnsemblPlants:AET3Gv20964800.1};	--	GO:0016021,integral component of membrane; GO:0005575,cellular_component; GO:0016020,membrane; GO:0031224,intrinsic component of membrane; GO:0110165,cellular anatomical entity	--	--	--	--
Cluster-89645.0	97.11	85.98	94.16	340.88	319.19	353.98	343	264	322	997	1020	1015	1.79581	2.40065e-113	5.03271e-111	up	445	K22395 cinnamyl-alcohol dehydrogenase [EC:1.1.1.195] | (RefSeq) berberine bridge enzyme-like 15 (A)	ko00940: Phenylpropanoid biosynthesis; ko01100: Metabolic pathways; ko01110: Biosynthesis of secondary metabolites	predicted protein, partial [Hordeum vulgare subsp. vulgare]	CYND4_CYNDA RecName: Full=Berberine bridge enzyme-like Cyn d 4 {ECO:0000305}; AltName: Full=60 kDa pollen antigen {ECO:0000303|PubMed:8828524, ECO:0000303|PubMed:8900140}; Short=BG60 {ECO:0000303|PubMed:20080962, ECO:0000303|PubMed:8828524, ECO:0000303|PubMed:8900140}; AltName: Full=Cyn d BG60 {ECO:0000303|PubMed:20080962}; AltName: Full=FAD-linked oxidoreductase BG60 {ECO:0000312|EMBL:AAS02108.1…	F2DJ07_HORVV SubName: Full=Predicted protein {ECO:0000313|EMBL:BAJ95078.1}; Flags: Fragment;	--	GO:0071949,FAD binding; GO:0016491,oxidoreductase activity; GO:0000166,nucleotide binding; GO:0003674,molecular_function; GO:0005488,binding; GO:0036094,small molecule binding; GO:0043167,ion binding; GO:0043168,anion binding; GO:0050660,flavin adenine dinucleotide binding; GO:0097159,organic cyclic compound binding; GO:1901265,nucleoside phosphate binding; GO:1901363,heterocyclic compound bindin…	FAD binding domain	--	--	--
Cluster-135847.0	11.85	15.68	13.91	58.18	54.46	56.37	405	463	462	1673	1677	1621	1.9837	3.67603e-113	7.68585e-111	up	1674	K09562 hsp70-interacting protein | (RefSeq) hsp70 nucleotide exchange factor FES1-like (A)	ko04141: Protein processing in endoplasmic reticulum	hsp70 nucleotide exchange factor FES1-like [Triticum urartu]	--	A0A446S826_TRITD RecName: Full=Fes1 domain-containing protein {ECO:0000259|Pfam:PF08609};	Armadillo/beta-catenin-like repeat-containing protein	--	Nucleotide exchange factor Fes1	--	--	--
Cluster-113557.1	54.94	51.76	49.16	153.24	161.6	142.79	881	719	766	2063	2339	1919	1.50334	4.59622e-113	9.58421e-111	up	1124	--	--	hypothetical protein FVEG_02849 [Fusarium verticillioides 7600]	--	B4FUQ3_MAIZE SubName: Full=Uncharacterized protein {ECO:0000313|EMBL:ACF85846.1};	--	GO:0005199,structural constituent of cell wall; GO:0003674,molecular_function; GO:0005198,structural molecule activity	Family 4 glycosyl hydrolase	--	--	--
Cluster-17706.1	4.44	4.28	4.71	44.87	41.39	47.73	66	55	68	558	554	593	3.26234	7.7849e-113	1.61903e-110	up	901	K13448 calcium-binding protein CML | (RefSeq) probable calcium-binding protein CML25/26 (A)	ko04626: Plant-pathogen interaction	probable calcium-binding protein CML25/26 [Triticum dicoccoides]	CML19_ORYSJ RecName: Full=Putative calcium-binding protein CML19; AltName: Full=Calmodulin-like protein 19;	A0A3B6LJZ8_WHEAT SubName: Full=Uncharacterized protein {ECO:0000313|EnsemblPlants:TraesCS5B02G152400.1.cds1};	Calmodulin and related proteins (EF-Hand superfamily)	GO:0005509,calcium ion binding; GO:0030234,enzyme regulator activity; GO:0003674,molecular_function; GO:0005488,binding; GO:0043167,ion binding; GO:0043169,cation binding; GO:0046872,metal ion binding; GO:0098772,molecular function regulator activity	EF-hand domain pair	--	--	--
Cluster-129638.1	27.75	32.32	28.61	89.75	92.45	92.09	464	468	465	1261	1396	1292	1.58249	1.33655e-111	2.72897e-109	up	977	--	--	--	--	A0A7S3K5H4_9STRA SubName: Full=Hypothetical protein {ECO:0000313|EMBL:CAE0374007.1};	--	GO:0110165,cellular anatomical entity; GO:0005575,cellular_component	Kre9/KNH-like N-terminal Ig-like domain	--	--	--
Cluster-47900.0	102.86	99.35	116.1	333.71	328.11	328.79	484	406	529	1303	1395	1266	1.56984	6.84228e-111	1.38982e-108	up	494	K00789 S-adenosylmethionine synthetase [EC:2.5.1.6] | (RefSeq) S-adenosylmethionine synthase 3-like (A)	ko00270: Cysteine and methionine metabolism; ko00999: Biosynthesis of various plant secondary metabolites; ko01100: Metabolic pathways; ko01110: Biosynthesis of secondary metabolites; ko01230: Biosynthesis of amino acids; ko01240: Biosynthesis of cofactors	uncharacterized protein LOC125548060 [Triticum urartu]	--	A0A3B6EEH8_WHEAT SubName: Full=Uncharacterized protein {ECO:0000313|EnsemblPlants:TraesCS3A02G127100.1.cds1};	--	--	--	--	--	--
Cluster-112415.0	119.94	127.79	127.97	295.34	282.86	294.55	954	882	1004	1956	2017	1917	1.13861	1.30359e-110	2.64103e-108	up	989	--	--	Bowman-Birk type trypsin inhibitor [Zea mays]	IBB3_WHEAT RecName: Full=Bowman-Birk type trypsin inhibitor; Short=WTI;	A0A8J8XM69_MAIZE SubName: Full=Bowman-Birk type trypsin inhibitor {ECO:0000313|EMBL:PWZ32806.1};	--	GO:0005576,extracellular region; GO:0004867,serine-type endopeptidase inhibitor activity; GO:0003674,molecular_function; GO:0004857,enzyme inhibitor activity; GO:0004866,endopeptidase inhibitor activity; GO:0030234,enzyme regulator activity; GO:0030414,peptidase inhibitor activity; GO:0061134,peptidase regulator activity; GO:0061135,endopeptidase regulator activity; GO:0098772,molecular function …	--	--	--	--
Cluster-139580.3	1.49	1.43	1.08	24.08	26.76	23.73	36	30	25	495	593	488	4.19832	3.42062e-110	6.89443e-108	up	1325	K12795 suppressor of G2 allele of SKP1 | (RefSeq) protein SGT1 homolog (A)	ko04626: Plant-pathogen interaction	uncharacterized transporter C1002.16c-like [Quercus suber]	NRT26_ARATH RecName: Full=High affinity nitrate transporter 2.6; Short=AtNRT2:6;	A0A5N6KWM8_9ROSI RecName: Full=MFS domain-containing protein {ECO:0000259|PROSITE:PS50850};	Permease of the major facilitator superfamily	GO:0016021,integral component of membrane; GO:0009705,plant-type vacuole membrane; GO:0005886,plasma membrane; GO:0015112,nitrate transmembrane transporter activity; GO:0071249,cellular response to nitrate; GO:0042128,nitrate assimilation; GO:0015706,nitrate transmembrane transport; GO:0003674,molecular_function; GO:0005215,transporter activity; GO:0008509,anion transmembrane transporter activity…	Major Facilitator Superfamily	--	--	--
Cluster-79877.38	67.12	67.42	63.41	139.82	145.38	142.9	1141	992	1047	1995	2228	2035	1.06239	8.44554e-110	1.69354e-107	up	987	K03283 heat shock 70kDa protein 1/6/8 | (RefSeq) heat shock cognate 70 kDa protein-like (A)	ko03040: Spliceosome; ko04141: Protein processing in endoplasmic reticulum; ko04144: Endocytosis	heat shock cognate 70 kDa protein-like [Triticum aestivum]	HS704_ARATH RecName: Full=Heat shock 70 kDa protein 4 {ECO:0000303|PubMed:11599561}; AltName: Full=Heat shock cognate 70 kDa protein 4 {ECO:0000303|PubMed:11402207}; AltName: Full=Heat shock cognate protein 70-4 {ECO:0000303|PubMed:11402207}; Short=AtHsc70-4 {ECO:0000303|PubMed:11402207}; AltName: Full=Heat shock protein 70-4 {ECO:0000303|PubMed:11599561}; Short=AtHsp70-4 {ECO:0000303|PubMed:1159…	A0A446S6P3_TRITD SubName: Full=Uncharacterized protein {ECO:0000313|EMBL:VAI06780.1};	Molecular chaperones HSP70/HSC70, HSP70 superfamily	GO:0005737,cytoplasm; GO:0005829,cytosol; GO:0005794,Golgi apparatus; GO:0005739,mitochondrion; GO:0005634,nucleus; GO:0009505,plant-type cell wall; GO:0000325,plant-type vacuole; GO:0005886,plasma membrane; GO:0005524,ATP binding; GO:0016887,ATP hydrolysis activity; GO:0140662,ATP-dependent protein folding chaperone; GO:0031072,heat shock protein binding; GO:0051787,misfolded protein binding; GO…	Hsp70 protein	--	--	--
Cluster-126054.0	1.27	1.03	0.86	14.36	13.55	13.02	57	40	38	549	554	498	3.656	1.05315e-109	2.10643e-107	up	2123	K01568 pyruvate decarboxylase [EC:4.1.1.1] | (RefSeq) pyruvate decarboxylase 1 (A)	ko00010: Glycolysis / Gluconeogenesis; ko01100: Metabolic pathways; ko01110: Biosynthesis of secondary metabolites	hypothetical protein FH972_025521 [Carpinus fangiana]	PDC1_ORYSI RecName: Full=Pyruvate decarboxylase 1; Short=PDC; EC=4.1.1.1;	A0A5N6L191_9ROSI RecName: Full=Pyruvate decarboxylase {ECO:0000256|ARBA:ARBA00013202}; EC=4.1.1.1 {ECO:0000256|ARBA:ARBA00013202};	Thiamine pyrophosphate-requiring enzyme	GO:0000287,magnesium ion binding; GO:0004737,pyruvate decarboxylase activity; GO:0030976,thiamine pyrophosphate binding; GO:0003674,molecular_function; GO:0005488,binding; GO:0043167,ion binding; GO:0043169,cation binding; GO:0046872,metal ion binding; GO:0003824,catalytic activity; GO:0016829,lyase activity; GO:0016830,carbon-carbon lyase activity; GO:0016831,carboxy-lyase activity; GO:0019842,v…	Thiamine pyrophosphate enzyme, N-terminal TPP binding domain	--	--	--
Cluster-123876.1	124.89	134.29	125.27	59.47	58.15	58.82	2139	1991	2084	855	898	844	-1.174	3.27411e-109	6.4989e-107	down	992	K13513 lysocardiolipin and lysophospholipid acyltransferase [EC:2.3.1.- 2.3.1.51] | (RefSeq) probable 1-acyl-sn-glycerol-3-phosphate acyltransferase 4 isoform X1 (A)	ko00561: Glycerolipid metabolism; ko00564: Glycerophospholipid metabolism; ko01100: Metabolic pathways; ko01110: Biosynthesis of secondary metabolites	osmotin-like protein [Triticum urartu]	OLP1_SOLLC RecName: Full=Osmotin-like protein; Flags: Precursor;	A0A446SRW6_TRITD SubName: Full=Uncharacterized protein {ECO:0000313|EMBL:VAI13815.1};	--	GO:0005576,extracellular region; GO:0006952,defense response; GO:0006950,response to stress; GO:0008150,biological_process; GO:0050896,response to stimulus; GO:0005575,cellular_component; GO:0110165,cellular anatomical entity	Thaumatin family	--	--	--
Cluster-103368.2	456.1	453.56	458.69	153.92	190.31	152.64	3112	2718	2992	878	1129	855	-1.54116	1.2862e-108	2.54657e-106	down	968	--	--	hypothetical protein CFC21_085957 [Triticum aestivum]	--	A0A1D6B289_WHEAT RecName: Full=DUF5637 domain-containing protein {ECO:0000259|Pfam:PF18687};	--	--	Conotoxin	--	--	--
Cluster-90190.3	8.19	9.13	7.88	30.09	29.01	27.51	399	382	372	1213	1256	1112	1.71916	2.92512e-108	5.77692e-106	up	2362	K00276 primary-amine oxidase [EC:1.4.3.21] | (RefSeq) hypothetical protein (A)	ko00260: Glycine, serine and threonine metabolism; ko00350: Tyrosine metabolism; ko00360: Phenylalanine metabolism; ko00410: beta-Alanine metabolism; ko00950: Isoquinoline alkaloid biosynthesis; ko00960: Tropane, piperidine and pyridine alkaloid biosynthesis; ko01100: Metabolic pathways; ko01110: Biosynthesis of secondary metabolites	copper amine oxidase 1-like [Quercus suber]	DAO1_TOBAC RecName: Full=Diamine oxidase [copper-containing] 1, peroxisomal {ECO:0000303|PubMed:24287136}; Short=NtDAO1 {ECO:0000303|PubMed:24287136}; EC=1.4.3.- {ECO:0000269|PubMed:24287136}; AltName: Full=Copper methylamine oxidase; EC=1.4.3.21 {ECO:0000250|UniProtKB:P46883}; AltName: Full=N-methylputrescine oxidase 2, peroxisomal {ECO:0000303|PubMed:17283012}; Short=NtMPO2 {ECO:0000303|PubMed:…	A0A383WM86_TETOB RecName: Full=Amine oxidase {ECO:0000256|RuleBase:RU000672}; EC=1.4.3.- {ECO:0000256|RuleBase:RU000672};	Copper amine oxidase	GO:0005777,peroxisome; GO:0052595,aliphatic amine oxidase activity; GO:0052594,aminoacetone:oxygen oxidoreductase(deaminating) activity; GO:0005507,copper ion binding; GO:0052596,phenethylamine:oxygen oxidoreductase (deaminating) activity; GO:0008131,primary amine oxidase activity; GO:0050232,putrescine oxidase activity; GO:0048038,quinone binding; GO:0052593,tryptamine:oxygen oxidoreductase (dea…	Copper amine oxidase, enzyme domain	--	--	--
Cluster-77277.1	15.47	12.87	15.5	134.79	140.51	160.74	73	52	71	529	600	622	3.24862	1.17487e-107	2.31447e-105	up	495	--	--	dehydrin 4 [Hordeum vulgare subsp. spontaneum]	DHN4_HORVU RecName: Full=Dehydrin DHN4; AltName: Full=B18;	A0A453PUM6_AEGTS SubName: Full=Uncharacterized protein {ECO:0000313|EnsemblPlants:AET6Gv20864900.5};	--	GO:0009415,response to water; GO:0001101,response to acid chemical; GO:0008150,biological_process; GO:0009628,response to abiotic stimulus; GO:0010035,response to inorganic substance; GO:0042221,response to chemical; GO:0050896,response to stimulus; GO:1901700,response to oxygen-containing compound	Dehydrin	--	--	--
Cluster-132567.1	101.56	97.54	100.14	41.38	43.16	38.58	1433	1233	1376	473	533	464	-1.37312	1.25249e-106	2.43073e-104	down	942	K06670 cohesin complex subunit SCC1 | (RefSeq) sister chromatid cohesion 1 protein 2-like (A)	--	glucan endo-1,3-beta-glucosidase 3-like isoform X2 [Triticum dicoccoides]	E1313_ARATH RecName: Full=Glucan endo-1,3-beta-glucosidase 13; EC=3.2.1.39; AltName: Full=(1->3)-beta-glucan endohydrolase 13; Short=(1->3)-beta-glucanase 13; AltName: Full=Beta-1,3-endoglucanase 13; Short=Beta-1,3-glucanase 13; Flags: Precursor;	A0A446M5M1_TRITD SubName: Full=Uncharacterized protein {ECO:0000313|EMBL:VAH45111.1};	--	GO:0031225,anchored component of membrane; GO:0046658,anchored component of plasma membrane; GO:0005576,extracellular region; GO:0005886,plasma membrane; GO:0009536,plastid; GO:0042973,glucan endo-1,3-beta-D-glucosidase activity; GO:0005975,carbohydrate metabolic process; GO:0071555,cell wall organization; GO:0006952,defense response; GO:0003674,molecular_function; GO:0003824,catalytic activity; …	X8 domain	--	--	--
Cluster-16164.3	2.32	2.74	2.76	20.03	22.47	19.58	81	83	94	590	710	577	2.94575	1.89915e-106	3.67661e-104	up	1709	K24193 MFS transporter, SP family, sugar:H+ symporter | (RefSeq) HT9; putative hexose transporter (A)	--	lactose permease-like [Quercus suber]	STP5_ARATH RecName: Full=Sugar transport protein 5; AltName: Full=Hexose transporter 5;	A0A1D1Z372_9ARAE SubName: Full=High-affinity glucose transporter {ECO:0000313|EMBL:JAT61299.1}; Flags: Fragment;	Predicted transporter (major facilitator superfamily)	GO:0016021,integral component of membrane; GO:0015145,monosaccharide transmembrane transporter activity; GO:0015293,symporter activity; GO:0003674,molecular_function; GO:0005215,transporter activity; GO:0015144,carbohydrate transmembrane transporter activity; GO:0022857,transmembrane transporter activity; GO:0051119,sugar transmembrane transporter activity; GO:0015291,secondary active transmembra…	Sugar (and other) transporter	--	--	--
Cluster-93814.6	3.09	3.7	3.81	16.47	16.34	15.54	191	198	229	857	910	810	2.14438	2.53218e-106	4.89004e-104	up	2779	--	--	uncharacterized protein LOC112032653 [Quercus suber]	--	A0A7S2LSA1_9STRA SubName: Full=Hypothetical protein {ECO:0000313|EMBL:CAD9614768.1};	--	GO:0016832,aldehyde-lyase activity; GO:0005975,carbohydrate metabolic process; GO:0003674,molecular_function; GO:0003824,catalytic activity; GO:0016829,lyase activity; GO:0016830,carbon-carbon lyase activity; GO:0008150,biological_process; GO:0008152,metabolic process; GO:0044238,primary metabolic process; GO:0071704,organic substance metabolic process	XFP N-terminal domain	--	--	--
Cluster-53019.6	2.01	1.71	1.75	12.67	11.06	10.95	150	110	127	801	748	693	2.62447	2.68432e-106	5.17111e-104	up	3308	K03380 phenol 2-monooxygenase (NADPH) [EC:1.14.13.7] | (RefSeq) phenol 2-monooxygenase-like (A)	--	aromatic hydroxylase fmpF-like [Quercus suber]	--	A0A5N6KSN6_9ROSI SubName: Full=Uncharacterized protein {ECO:0000313|EMBL:KAB8342795.1};	Monooxygenase involved in coenzyme Q (ubiquinone) biosynthesis	GO:0071949,FAD binding; GO:0000166,nucleotide binding; GO:0003674,molecular_function; GO:0005488,binding; GO:0036094,small molecule binding; GO:0043167,ion binding; GO:0043168,anion binding; GO:0050660,flavin adenine dinucleotide binding; GO:0097159,organic cyclic compound binding; GO:1901265,nucleoside phosphate binding; GO:1901363,heterocyclic compound binding	FAD binding domain	--	--	--
Cluster-135654.1	1.32	1.07	1.95	18.77	17.75	17.88	51	36	73	614	622	585	3.59976	3.81684e-106	7.31685e-104	up	1863	--	--	general amino acid permease AGP2-like [Quercus suber]	--	A0A5N6KU00_9ROSI RecName: Full=AA_permease domain-containing protein {ECO:0000259|Pfam:PF00324};	Amino acid transporters	GO:0016021,integral component of membrane; GO:0055085,transmembrane transport; GO:0006810,transport; GO:0008150,biological_process; GO:0009987,cellular process; GO:0051179,localization; GO:0051234,establishment of localization; GO:0005575,cellular_component; GO:0016020,membrane; GO:0031224,intrinsic component of membrane; GO:0110165,cellular anatomical entity	Amino acid permease	--	--	--
Cluster-51504.4	5.78	5.88	5.67	41.67	36.9	34.1	138	121	131	837	795	684	2.65697	4.26643e-106	8.15877e-104	up	1263	--	--	protein UPS3, mitochondrial-like [Quercus suber]	--	A0A5N6L673_9ROSI SubName: Full=Uncharacterized protein {ECO:0000313|EMBL:KAB8670405.1};	Predicted member of the intramitochondrial sorting protein family	--	PRELI-like family	--	--	--
Cluster-52866.6	102.46	108.48	112.89	267.94	282.7	297.69	836	770	889	1794	2064	1991	1.31459	8.90946e-106	1.69963e-103	up	641	K13993 HSP20 family protein | (RefSeq) 17.9 kDa class I heat shock protein (A)	ko04141: Protein processing in endoplasmic reticulum	17.9 kDa class I heat shock protein [Triticum dicoccoides]	HS17A_ORYSJ RecName: Full=17.9 kDa class I heat shock protein; AltName: Full=17.9 kDa heat shock protein 1; Short=OsHsp17.9A;	A0A3B6JLS5_WHEAT RecName: Full=SHSP domain-containing protein {ECO:0000259|PROSITE:PS01031};	Molecular chaperone (small heat-shock protein Hsp26/Hsp42)	GO:0005634,nucleus; GO:0043621,protein self-association; GO:0051082,unfolded protein binding; GO:0051259,protein complex oligomerization; GO:0006457,protein folding; GO:0009408,response to heat; GO:0042542,response to hydrogen peroxide; GO:0009651,response to salt stress; GO:0003674,molecular_function; GO:0005488,binding; GO:0005515,protein binding; GO:0008150,biological_process; GO:0009987,cellu…	Hsp20/alpha crystallin family	--	--	--
Cluster-87761.0	19.64	20.03	19.95	50.7	49.03	50.8	616	538	603	1331	1375	1334	1.28828	2.01828e-105	3.84085e-103	up	1672	--	--	uncharacterized protein LOC119336175 [Triticum dicoccoides]	--	A0A3B5YXU3_WHEAT RecName: Full=AB hydrolase-1 domain-containing protein {ECO:0000259|Pfam:PF12697};	--	--	Alpha/beta hydrolase family	--	--	--
Cluster-67222.4	7.78	7.12	7.7	30.62	30.86	27.7	195	173	186	785	847	710	2.16504	4.24896e-105	8.06633e-103	up	1526	K07513 acetyl-CoA acyltransferase 1 [EC:2.3.1.16] | (RefSeq) 3-ketoacyl-CoA thiolase 2, peroxisomal (A)	ko00071: Fatty acid degradation; ko00280: Valine, leucine and isoleucine degradation; ko00592: alpha-Linolenic acid metabolism; ko01040: Biosynthesis of unsaturated fatty acids; ko01100: Metabolic pathways; ko01110: Biosynthesis of secondary metabolites; ko01212: Fatty acid metabolism; ko04146: Peroxisome	3-ketoacyl-coa thiolase, peroxisomal [Quercus suber]	THIK2_ARATH RecName: Full=3-ketoacyl-CoA thiolase 2, peroxisomal; EC=2.3.1.16; AltName: Full=Acetyl-CoA acyltransferase 2; AltName: Full=Beta-ketothiolase 2; AltName: Full=Peroxisomal 3-oxoacyl-CoA thiolase 2; AltName: Full=Peroxisome defective protein 1; Flags: Precursor;	A0A0D6R5N7_ARACU SubName: Full=Uncharacterized protein {ECO:0000313|EMBL:JAG99157.1};	3-oxoacyl CoA thiolase	GO:0005783,endoplasmic reticulum; GO:0009514,glyoxysome; GO:0005739,mitochondrion; GO:0005730,nucleolus; GO:0005777,peroxisome; GO:0000325,plant-type vacuole; GO:0003988,acetyl-CoA C-acyltransferase activity; GO:0006635,fatty acid beta-oxidation; GO:0006633,fatty acid biosynthetic process; GO:0010111,glyoxysome organization; GO:0009695,jasmonic acid biosynthetic process; GO:0031408,oxylipin biosy…	Thiolase, N-terminal domain	--	--	--
Cluster-60553.23	11.66	15.73	14.69	62.65	58.46	59.64	358	417	438	1618	1618	1540	2.05877	4.5629e-105	8.62058e-103	up	1535	K15382 solute carrier family 50 (sugar transporter) | (RefSeq) bidirectional sugar transporter SWEET13-like (A)	--	bidirectional sugar transporter SWEET13-like [Triticum dicoccoides]	SWT13_ORYSJ RecName: Full=Bidirectional sugar transporter SWEET13; Short=OsSWEET13;	M7YV15_TRIUA RecName: Full=Bidirectional sugar transporter SWEET {ECO:0000256|RuleBase:RU910715};	Multitransmembrane protein	GO:0016021,integral component of membrane; GO:0005887,integral component of plasma membrane; GO:0051119,sugar transmembrane transporter activity; GO:0008643,carbohydrate transport; GO:0003674,molecular_function; GO:0005215,transporter activity; GO:0015144,carbohydrate transmembrane transporter activity; GO:0022857,transmembrane transporter activity; GO:0006810,transport; GO:0008150,biological_pro…	Sugar efflux transporter for intercellular exchange	--	--	--
Cluster-103776.1	22.28	21.13	21.72	50.79	47.61	48.05	826	762	866	1831	1837	1733	1.22451	7.2093e-105	1.35876e-102	up	2019	K00505 tyrosinase [EC:1.14.18.1] | (RefSeq) tyrosinase-like (A)	ko00350: Tyrosine metabolism; ko00950: Isoquinoline alkaloid biosynthesis; ko01100: Metabolic pathways; ko01110: Biosynthesis of secondary metabolites	tyrosinase-like [Quercus suber]	--	A0A2P6U0E0_CHLSO SubName: Full=Tyrosinase superfamily {ECO:0000313|EMBL:PRW59760.1};	--	GO:0016491,oxidoreductase activity; GO:0003674,molecular_function; GO:0003824,catalytic activity	Common central domain of tyrosinase	--	--	--
Cluster-112869.1	6.02	8.04	5.48	159.61	135.15	140.98	25	29	22	549	507	477	4.41982	7.17922e-104	1.34341e-101	up	471	--	--	--	--	--	--	--	CFEM domain	--	--	--
Cluster-71209.4	5.01	5.81	4.99	20.22	19.25	17.5	432	430	398	1362	1436	1245	1.76443	2.822e-103	5.24311e-101	up	5128	K12448 UDP-arabinose 4-epimerase [EC:5.1.3.5] | (RefSeq) putative UDP-arabinose 4-epimerase 2 (A)	ko00520: Amino sugar and nucleotide sugar metabolism; ko01100: Metabolic pathways; ko01250: Biosynthesis of nucleotide sugars	peroxisomal hydratase-dehydrogenase-epimerase-like [Quercus suber]	ECH2_ARATH RecName: Full=Enoyl-CoA hydratase 2, peroxisomal; EC=4.2.1.119;	A0A2D4C885_PYTIN SubName: Full=Peroxisomal multifunctional enzyme, putative {ECO:0000313|EMBL:GAY01996.1};	Peroxisomal multifunctional beta-oxidation protein and related enzymes	GO:0005739,mitochondrion; GO:0005777,peroxisome; GO:0044594,17-beta-hydroxysteroid dehydrogenase (NAD+) activity; GO:0003857,3-hydroxyacyl-CoA dehydrogenase activity; GO:0080023,3R-hydroxyacyl-CoA dehydratase activity; GO:0004300,enoyl-CoA hydratase activity; GO:0006635,fatty acid beta-oxidation; GO:0033542,fatty acid beta-oxidation, unsaturated, even number; GO:0003674,molecular_function; GO:000…	Replication protein A interacting N-terminal	--	--	--
Cluster-86591.44	24.54	25.02	23.21	63.61	70.27	70.87	653	576	600	1421	1684	1584	1.44318	4.23827e-103	7.83731e-101	up	1371	--	--	uncharacterized protein LOC119275475 [Triticum dicoccoides]	--	A0A077RT44_WHEAT SubName: Full=Uncharacterized protein {ECO:0000313|EMBL:CDM83350.1, ECO:0000313|EnsemblPlants:TraesCS3B02G173800.1.cds1};	--	--	--	--	--	--
Cluster-116555.2	5.41	5.31	6.67	36.4	34.26	31.05	160	136	191	906	914	773	2.5007	5.60971e-103	1.03272e-100	up	1491	--	--	unknown [Zea mays]	--	B4FSH5_MAIZE RecName: Full=BHLH domain-containing protein {ECO:0000259|PROSITE:PS50888};	Predicted DNA-binding protein	GO:0046983,protein dimerization activity; GO:0003674,molecular_function; GO:0005488,binding; GO:0005515,protein binding	Helix-loop-helix DNA-binding domain	bHLH	TF	bHLH
Cluster-94332.1	18.3	19.82	20.67	106.16	106.97	92.99	189	169	202	886	967	765	2.31002	5.6111e-103	1.03272e-100	up	723	--	--	an1-type zinc finger protein tmc1 [Quercus suber]	--	--	--	--	--	--	--	--
Cluster-133835.0	16.45	16.28	17.56	1.52	1.84	2.24	684	552	689	54	66	81	-3.16974	2.24382e-102	4.09132e-100	down	2027	--	--	hypothetical protein FH972_022410 [Carpinus fangiana]	--	A0A5N6KSH4_9ROSI RecName: Full=DUF2235 domain-containing protein {ECO:0000259|Pfam:PF09994};	--	--	Uncharacterized alpha/beta hydrolase domain (DUF2235)	--	--	--
Cluster-6516.191	103.94	102.92	105.62	46.67	48.32	42.52	2068	1773	2042	780	867	709	-1.23413	2.32532e-102	4.23008e-100	down	1103	K21351 sucrose:sucrose fructosyltransferase [EC:2.4.1.99] | (RefSeq) sucrose:sucrose 1-fructosyltransferase-like (A)	--	unnamed protein product [Triticum turgidum subsp. durum]	SST_FESAR RecName: Full=Sucrose:sucrose 1-fructosyltransferase; EC=2.4.1.99; AltName: Full=Sucrose 1(F)-fructosyltransferase; AltName: Full=Sucrose:sucrose 1(F)-beta-D-fructosyltransferase; Flags: Precursor;	A0A446WW24_TRITD SubName: Full=Uncharacterized protein {ECO:0000313|EMBL:VAI68244.1};	Beta-fructofuranosidase (invertase)	GO:0005773,vacuole; GO:0004564,beta-fructofuranosidase activity; GO:0050306,sucrose 1F-fructosyltransferase activity; GO:0005975,carbohydrate metabolic process; GO:0003674,molecular_function; GO:0003824,catalytic activity; GO:0004553,hydrolase activity, hydrolyzing O-glycosyl compounds; GO:0016787,hydrolase activity; GO:0016798,hydrolase activity, acting on glycosyl bonds; GO:0016740,transferase …	Glycosyl hydrolases family 32 N-terminal domain	--	--	--
Cluster-117608.2	111.65	115.79	109.65	255.25	242.96	239.21	1127	1013	1074	2156	2213	2011	1.07503	2.3542e-102	4.27272e-100	up	711	--	--	metallothionein-like protein type 2 [Aegilops tauschii subsp. strangulata]	MT1_COFAR RecName: Full=Metallothionein-like protein 1; Short=MT-1;	M8BG83_AEGTA SubName: Full=Metallothionein-like protein 4A {ECO:0000313|EMBL:EMT05738.1, ECO:0000313|EnsemblPlants:EMT05738};	Predicted metallothionein	GO:0046872,metal ion binding; GO:0003674,molecular_function; GO:0005488,binding; GO:0043167,ion binding; GO:0043169,cation binding	--	--	--	--
Cluster-63577.2	23.73	25	24.65	1.49	2.56	2.09	645	598	626	30	62	48	-3.65755	5.68477e-102	1.02699e-99	down	1476	K18106 D-galacturonate reductase [EC:1.1.1.-] | (RefSeq) hypothetical protein (A)	ko00040: Pentose and glucuronate interconversions; ko01100: Metabolic pathways	uncharacterized protein LOC112018975 [Quercus suber]	--	A0A5N6KTR7_9ROSI RecName: Full=GFO_IDH_MocA domain-containing protein {ECO:0000259|Pfam:PF01408};	--	GO:0004420,hydroxymethylglutaryl-CoA reductase (NADPH) activity; GO:0000166,nucleotide binding; GO:0003674,molecular_function; GO:0003824,catalytic activity; GO:0016491,oxidoreductase activity; GO:0016614,oxidoreductase activity, acting on CH-OH group of donors; GO:0016616,oxidoreductase activity, acting on the CH-OH group of donors, NAD or NADP as acceptor; GO:0005488,binding; GO:0036094,small m…	Oxidoreductase family, NAD-binding Rossmann fold	--	--	--
Cluster-114321.0	18.21	17.11	18.8	56.3	56.69	54.9	389	316	391	1006	1088	980	1.57542	1.38763e-101	2.48963e-99	up	1230	K10666 E3 ubiquitin-protein ligase RNF5 [EC:2.3.2.27] | (RefSeq) E3 ubiquitin-protein ligase RMA2-like (A)	ko04141: Protein processing in endoplasmic reticulum	unnamed protein product [Triticum turgidum subsp. durum]	RMA1_CAPAN RecName: Full=E3 ubiquitin-protein ligase RMA1H1; EC=2.3.2.27; AltName: Full=Protein RING membrane-anchor 1 homolog 1; AltName: Full=RING-type E3 ubiquitin transferase RMA1H1 {ECO:0000305};	A0A446TVF0_TRITD RecName: Full=RING-type E3 ubiquitin transferase {ECO:0000256|ARBA:ARBA00012483}; EC=2.3.2.27 {ECO:0000256|ARBA:ARBA00012483};	Predicted E3 ubiquitin ligase	GO:0005789,endoplasmic reticulum membrane; GO:0016021,integral component of membrane; GO:0046872,metal ion binding; GO:0061630,ubiquitin protein ligase activity; GO:0004842,ubiquitin-protein transferase activity; GO:0043161,proteasome-mediated ubiquitin-dependent protein catabolic process; GO:0016567,protein ubiquitination; GO:0009409,response to cold; GO:0009723,response to ethylene; GO:0006970,…	RING-type zinc-finger	--	--	--
Cluster-78400.2	54.84	53.02	55.05	25.66	21.44	23.66	3724	3114	3635	1468	1312	1355	-1.25053	1.68908e-101	3.02357e-99	down	3023	K10999 cellulose synthase A [EC:2.4.1.12] | (RefSeq) cellulose synthase A catalytic subunit 7 [UDP-forming]-like (A)	--	cellulose synthase A catalytic subunit 7 [UDP-forming]	CESA7_ORYSJ RecName: Full=Cellulose synthase A catalytic subunit 7 [UDP-forming]; EC=2.4.1.12; AltName: Full=OsCesA7;	A0A3B5XXT8_WHEAT RecName: Full=Cellulose synthase {ECO:0000256|RuleBase:RU361116}; EC=2.4.1.12 {ECO:0000256|RuleBase:RU361116};	--	GO:0016021,integral component of membrane; GO:0005886,plasma membrane; GO:0016760,cellulose synthase (UDP-forming) activity; GO:0016759,cellulose synthase activity; GO:0046872,metal ion binding; GO:0071555,cell wall organization; GO:0030244,cellulose biosynthetic process; GO:0009833,plant-type primary cell wall biogenesis; GO:0009834,plant-type secondary cell wall biogenesis; GO:0003674,molecular…	Cellulose synthase	--	--	--
Cluster-101809.14	47.97	40.92	31.78	220.43	229.93	225.37	403	298	259	1546	1743	1571	2.42695	5.87295e-101	1.04415e-98	up	643	K03809 NAD(P)H dehydrogenase (quinone) [EC:1.6.5.2] | (RefSeq) NAD(P)H dehydrogenase (quinone) FQR1-like (A)	ko00130: Ubiquinone and other terpenoid-quinone biosynthesis; ko01100: Metabolic pathways; ko01110: Biosynthesis of secondary metabolites; ko01240: Biosynthesis of cofactors	unnamed protein product [Triticum turgidum subsp. durum]	QR2_TRIVS RecName: Full=Quinone-oxidoreductase QR2 {ECO:0000303|PubMed:11260494}; Short=TvQR2 {ECO:0000303|PubMed:11260494}; EC=1.6.5.2 {ECO:0000269|Ref.2};	A0A446S6Q4_TRITD SubName: Full=Uncharacterized protein {ECO:0000313|EMBL:VAI06789.1};	1,4-benzoquinone reductase-like; Trp repressor binding protein-like/protoplast-secreted protein	GO:0010181,FMN binding; GO:0050136,NADH dehydrogenase (quinone) activity; GO:0008753,NADPH dehydrogenase (quinone) activity; GO:0000166,nucleotide binding; GO:0003674,molecular_function; GO:0005488,binding; GO:0032553,ribonucleotide binding; GO:0036094,small molecule binding; GO:0043167,ion binding; GO:0043168,anion binding; GO:0097159,organic cyclic compound binding; GO:0097367,carbohydrate deri…	--	--	--	--
Cluster-48202.4	12.78	10.53	9.59	45.95	50.21	45.04	261	207	217	865	1020	840	2.0776	1.0375e-100	1.83624e-98	up	1490	--	--	mannitol-1-phosphate 5-dehydrogenase-like [Quercus suber]	--	A0A0D6QVM1_ARACU RecName: Full=Mannitol-1-phosphate 5-dehydrogenase {ECO:0000256|ARBA:ARBA00016219}; EC=1.1.1.17 {ECO:0000256|ARBA:ARBA00012939};	--	GO:0008926,mannitol-1-phosphate 5-dehydrogenase activity; GO:0019594,mannitol metabolic process; GO:0003674,molecular_function; GO:0003824,catalytic activity; GO:0016491,oxidoreductase activity; GO:0016614,oxidoreductase activity, acting on CH-OH group of donors; GO:0016616,oxidoreductase activity, acting on the CH-OH group of donors, NAD or NADP as acceptor; GO:0005975,carbohydrate metabolic pro…	Mannitol dehydrogenase C-terminal domain	--	--	--
Cluster-80308.0	5.55	5.57	5.47	30.07	27.67	33.01	155	138	151	719	723	808	2.42949	1.22428e-100	2.16194e-98	up	2679	K09422 transcription factor MYB, plant | (RefSeq) trichome differentiation protein GL1-like (A)	--	trichome differentiation protein GL1-like [Triticum aestivum]	EOBI_PETHY RecName: Full=MYB-like transcription factor EOBI {ECO:0000303|PubMed:23275577}; AltName: Full=Protein EMISSION OF BENZENOIDS I {ECO:0000303|PubMed:23275577}; Short=PhEOBI {ECO:0000303|PubMed:23275577};	A0A1D5UGA3_WHEAT SubName: Full=Genome assembly, chromosome: II {ECO:0000313|EMBL:SPT19033.1};	Transcription factor, Myb superfamily	GO:0005634,nucleus; GO:0003700,DNA-binding transcription factor activity; GO:0000976,transcription cis-regulatory region binding; GO:0007623,circadian rhythm; GO:0010597,green leaf volatile biosynthetic process; GO:0045893,positive regulation of DNA-templated transcription; GO:2000762,regulation of phenylpropanoid metabolic process; GO:0019632,shikimate metabolic process; GO:0003674,molecular_fun…	Myb-like DNA-binding domain	MYB-related	TF	MYB->MYB-related
Cluster-109419.0	31.62	30.95	30.59	74.3	74.6	75.28	668	566	628	1319	1421	1335	1.21677	2.02405e-100	3.56619e-98	up	1152	--	--	hypothetical protein ZWY2020_035582 [Hordeum vulgare]	--	A0A446J9D0_TRITD SubName: Full=Uncharacterized protein {ECO:0000313|EMBL:VAH09677.1};	--	--	--	--	--	--
Cluster-120813.0	7.53	6.82	7.5	2.1	2.23	2.14	1128	881	1090	264	302	270	-1.80115	3.27191e-100	5.75188e-98	down	6367	K05658 ATP-binding cassette, subfamily B (MDR/TAP), member 1 [EC:7.6.2.2] | (RefSeq) putative ABC transporter B family member 8 (A)	ko02010: ABC transporters	putative ABC transporter B family member 8 [Aegilops tauschii subsp. strangulata]	AB8B_ARATH RecName: Full=Putative ABC transporter B family member 8; Short=ABC transporter ABCB.8; Short=AtABCB8; AltName: Full=P-glycoprotein 8; AltName: Full=Putative multidrug resistance protein 22;	A0A453FHA7_AEGTS SubName: Full=Uncharacterized protein {ECO:0000313|EnsemblPlants:AET3Gv20677400.3};	Multidrug/pheromone exporter, ABC superfamily	GO:0016021,integral component of membrane; GO:0140359,ABC-type transporter activity; GO:0005524,ATP binding; GO:0042626,ATPase-coupled transmembrane transporter activity; GO:0055085,transmembrane transport; GO:0003674,molecular_function; GO:0005215,transporter activity; GO:0015399,primary active transmembrane transporter activity; GO:0022804,active transmembrane transporter activity; GO:0022857,t…	B3 DNA binding domain	B3	TF	B3->B3
Cluster-139940.2	80.13	78.3	82.94	28.8	33.44	34.38	2462	2081	2477	744	926	888	-1.36962	4.19253e-100	7.35382e-98	down	1536	K10529 fatty acid alpha-dioxygenase [EC:1.13.11.92] | (RefSeq) alpha-dioxygenase 1-like (A)	ko00592: alpha-Linolenic acid metabolism; ko01110: Biosynthesis of secondary metabolites	uncharacterized protein LOC109747600 [Aegilops tauschii subsp. strangulata]	--	A0A453MJJ2_AEGTS SubName: Full=Uncharacterized protein {ECO:0000313|EnsemblPlants:AET5Gv21210300.1};	--	--	Neprosin	--	--	--
Cluster-91421.1	379.52	396.85	406	143.91	141.6	154.52	1991	1693	1827	634	782	672	-1.315	8.0557e-100	1.4067e-97	down	682	--	--	--	--	--	--	--	--	--	--	--
Cluster-136024.5	25.17	27.28	25.15	6.88	8.33	8.91	2396	2236	2331	559	724	720	-1.71478	1.29733e-99	2.25537e-97	down	4958	K19033 30S ribosomal protein S31 | (RefSeq) glycosyltransferase family 64 protein C4-like isoform X1 (A)	--	glucosamine inositolphosphorylceramide transferase 1-like [Triticum urartu]	GINT1_ARATH RecName: Full=Glucosamine inositolphosphorylceramide transferase 1 {ECO:0000303|PubMed:29760197}; EC=2.7.1.227 {ECO:0000269|PubMed:29760197}; AltName: Full=Glycosyltransferase family protein 64 protein C5 {ECO:0000303|PubMed:24905498}; Short=GT64 C5 {ECO:0000303|PubMed:24905498};	A0A453H355_AEGTS RecName: Full=Glyco_transf_64 domain-containing protein {ECO:0000259|Pfam:PF09258};	Acetylglucosaminyltransferase EXT2/exostosin 2	GO:0016021,integral component of membrane; GO:0016757,glycosyltransferase activity; GO:0045140,inositol phosphoceramide synthase activity; GO:0046872,metal ion binding; GO:0030259,lipid glycosylation; GO:0006486,protein glycosylation; GO:0009737,response to abscisic acid; GO:0009651,response to salt stress; GO:0009845,seed germination; GO:0003674,molecular_function; GO:0003824,catalytic activity;…	HPP family	--	--	--
Cluster-118459.0	2.81	3.07	3.08	20.36	19.36	17.86	102	96	108	622	634	546	2.64368	2.03865e-99	3.52848e-97	up	1760	K12795 suppressor of G2 allele of SKP1 | (RefSeq) protein SGT1 homolog (A)	ko04626: Plant-pathogen interaction	hypothetical protein Mapa_006119 [Marchantia paleacea]	GLPT4_ARATH RecName: Full=Putative glycerol-3-phosphate transporter 4; Short=G-3-P transporter 4; AltName: Full=Glycerol-3-phosphate permease 4; Short=AtG3Pp4; Short=G-3-P permease 4;	A0A2R6WLK7_MARPO RecName: Full=MFS domain-containing protein {ECO:0000259|PROSITE:PS50850};	Permease of the major facilitator superfamily	GO:0016021,integral component of membrane; GO:0000325,plant-type vacuole; GO:0061513,glucose 6-phosphate:inorganic phosphate antiporter activity; GO:0008643,carbohydrate transport; GO:0055062,phosphate ion homeostasis; GO:0003674,molecular_function; GO:0005215,transporter activity; GO:0005452,solute:inorganic anion antiporter activity; GO:0008509,anion transmembrane transporter activity; GO:00150…	Major Facilitator Superfamily	--	--	--
Cluster-102018.1	4.3	3.33	4.69	25.61	25.03	23.53	152	102	161	764	800	702	2.54012	2.48516e-99	4.29183e-97	up	1726	K08832 serine/threonine-protein kinase SRPK3 [EC:2.7.11.1] | (RefSeq) serine/threonine-protein kinase SRPK (A)	--	serine/threonine-protein kinase SRPK-like [Quercus suber]	AFC3_ARATH RecName: Full=Serine/threonine-protein kinase AFC3; EC=2.7.12.1;	A0A5N6L646_9ROSI RecName: Full=Protein kinase domain-containing protein {ECO:0000259|PROSITE:PS50011};	Serine/threonine protein kinase	GO:0005634,nucleus; GO:0005524,ATP binding; GO:0106310,protein serine kinase activity; GO:0004674,protein serine/threonine kinase activity; GO:0004712,protein serine/threonine/tyrosine kinase activity; GO:0004713,protein tyrosine kinase activity; GO:0046777,protein autophosphorylation; GO:0006468,protein phosphorylation; GO:0000166,nucleotide binding; GO:0003674,molecular_function; GO:0005488,bin…	Protein kinase domain	--	--	--
Cluster-90750.0	17.8	17.33	16.33	49.74	52.72	51.65	447	368	390	1036	1176	1080	1.5363	2.54572e-99	4.38676e-97	up	1333	--	--	--	--	--	--	--	--	--	--	--
Cluster-107594.0	58.3	66.24	61.1	146.27	141.6	155.26	1153	1134	1174	2430	2525	2576	1.2062	2.23562e-98	3.81882e-96	up	1098	K09286 EREBP-like factor | (RefSeq) ethylene-responsive transcription factor 4-like (A)	--	ethylene-responsive transcription factor 4-like [Triticum dicoccoides]	ERF78_ARATH RecName: Full=Ethylene-responsive transcription factor 4; Short=AtERF4; AltName: Full=Ethylene-responsive element-binding factor 4; Short=EREBP-4; AltName: Full=Protein RELATED TO APETALA2 5;	A0A446MMP3_TRITD RecName: Full=AP2/ERF domain-containing protein {ECO:0000259|PROSITE:PS51032};	--	GO:0016604,nuclear body; GO:0005634,nucleus; GO:0003700,DNA-binding transcription factor activity; GO:0000976,transcription cis-regulatory region binding; GO:0071456,cellular response to hypoxia; GO:0009873,ethylene-activated signaling pathway; GO:0009864,induced systemic resistance, jasmonic acid mediated signaling pathway; GO:0010105,negative regulation of ethylene-activated signaling pathway; …	AP2 domain	AP2/ERF-ERF	TF	AP2/ERF->AP2/ERF-ERF
Cluster-111315.1	36.92	40.66	40.29	81.29	80.98	79.79	1239	1181	1303	2326	2451	2272	1.00604	2.69349e-98	4.58097e-96	up	1725	K15400 omega-hydroxypalmitate O-feruloyl transferase [EC:2.3.1.188] | (RefSeq) omega-hydroxypalmitate O-feruloyl transferase-like (A)	ko00073: Cutin, suberine and wax biosynthesis	omega-hydroxypalmitate O-feruloyl transferase-like [Triticum urartu]	HHT1_ARATH RecName: Full=Omega-hydroxypalmitate O-feruloyl transferase; EC=2.3.1.188; AltName: Full=Omega-hydroxyacid hydroxycinnamoyltransferase; AltName: Full=Protein ALIPHATIC SUBERIN FERULOYL TRANSFERASE;	A0A453B765_AEGTS SubName: Full=Uncharacterized protein {ECO:0000313|EnsemblPlants:AET2Gv20391300.9};	--	GO:0016747,acyltransferase activity, transferring groups other than amino-acyl groups; GO:0050734,hydroxycinnamoyltransferase activity; GO:0102406,omega-hydroxypalmitate O-sinapoyl transferase activity; GO:0052325,cell wall pectin biosynthetic process; GO:0010345,suberin biosynthetic process; GO:0003674,molecular_function; GO:0003824,catalytic activity; GO:0016740,transferase activity; GO:0016746…	Transferase family	--	--	--
Cluster-119232.26	59.81	55.49	60.96	124.58	126.21	132.5	1195	959	1183	2090	2273	2220	1.06886	4.27531e-98	7.25554e-96	up	1106	no KO assigned | (RefSeq) beta-fructofuranosidase, insoluble isoenzyme 7-like (A)	--	unnamed protein product [Triticum turgidum subsp. durum]	6FEH_WHEAT RecName: Full=Fructan 6-exohydrolase {ECO:0000312|EMBL:CAJ28591.1}; EC=3.2.1.154; Flags: Precursor;	A0A453D3X6_AEGTS SubName: Full=Uncharacterized protein {ECO:0000313|EnsemblPlants:AET2Gv21077700.14};	Beta-fructofuranosidase (invertase)	GO:0033949,fructan beta-(2,6)-fructosidase activity; GO:0005975,carbohydrate metabolic process; GO:0003674,molecular_function; GO:0003824,catalytic activity; GO:0004553,hydrolase activity, hydrolyzing O-glycosyl compounds; GO:0016787,hydrolase activity; GO:0016798,hydrolase activity, acting on glycosyl bonds; GO:0008150,biological_process; GO:0008152,metabolic process; GO:0044238,primary metaboli…	Glycosyl hydrolases family 32 N-terminal domain	--	--	--
Cluster-51384.7	65.04	58.72	52.02	187.48	155.12	160.95	534	467	461	1222	1343	1205	1.45182	1.08721e-97	1.83712e-95	up	718	--	--	non-specific lipid-transfer protein Cw18 [Triticum aestivum]	NLTP8_HORVU RecName: Full=Non-specific lipid-transfer protein Cw18; Short=LTP Cw-18; AltName: Full=PKG2316; Flags: Precursor;	A0A452XCU3_AEGTS RecName: Full=Non-specific lipid-transfer protein {ECO:0000256|RuleBase:RU000628};	--	GO:0008289,lipid binding; GO:0006869,lipid transport; GO:0003674,molecular_function; GO:0005488,binding; GO:0006810,transport; GO:0008150,biological_process; GO:0010876,lipid localization; GO:0033036,macromolecule localization; GO:0051179,localization; GO:0051234,establishment of localization; GO:0071702,organic substance transport	Protease inhibitor/seed storage/LTP family	--	--	--
Cluster-87457.0	50.19	51.9	44.77	10.75	11.12	10.11	906	811	785	163	181	153	-2.24805	1.25235e-97	2.11162e-95	down	1029	K01183 chitinase [EC:3.2.1.14] | (RefSeq) endochitinase EP3-like (A)	ko00520: Amino sugar and nucleotide sugar metabolism; ko01100: Metabolic pathways	acidic endochitinase-like [Dioscorea cayenensis subsp. rotundata]	CHIT_DIOJA RecName: Full=Acidic endochitinase; EC=3.2.1.14;	Q852P9_9LILI RecName: Full=Chitinase {ECO:0000256|ARBA:ARBA00012729}; EC=3.2.1.14 {ECO:0000256|ARBA:ARBA00012729};	Predicted chitinase	GO:0008061,chitin binding; GO:0004568,chitinase activity; GO:0016998,cell wall macromolecule catabolic process; GO:0006032,chitin catabolic process; GO:0006952,defense response; GO:0000272,polysaccharide catabolic process; GO:0003674,molecular_function; GO:0005488,binding; GO:0097367,carbohydrate derivative binding; GO:0003824,catalytic activity; GO:0004553,hydrolase activity, hydrolyzing O-glyco…	Chitinase class I	--	--	--
Cluster-117765.2	63.94	70.99	65.92	24.49	23.77	20.22	1477	1390	1533	509	478	450	-1.52891	2.23561e-97	3.74536e-95	down	2353	--	--	germin-like protein 4-1 [Hordeum vulgare subsp. vulgare]	GL41_ORYSJ RecName: Full=Germin-like protein 4-1; Flags: Precursor;	A0A8I6XPX2_HORVV RecName: Full=Germin-like protein {ECO:0000256|RuleBase:RU366015};	--	GO:0048046,apoplast; GO:0030145,manganese ion binding; GO:0003674,molecular_function; GO:0005488,binding; GO:0043167,ion binding; GO:0043169,cation binding; GO:0046872,metal ion binding; GO:0046914,transition metal ion binding; GO:0005575,cellular_component; GO:0005576,extracellular region; GO:0110165,cellular anatomical entity	Cupin	--	--	--
Cluster-111092.10	26.37	28.29	32.94	159.56	156.63	134.47	202	189	245	1065	1128	891	2.36293	3.68786e-97	6.139e-95	up	627	--	--	--	--	--	--	--	--	--	--	--
Cluster-129746.0	23.34	21.78	21.77	64	61.5	56.99	583	506	551	1389	1465	1254	1.41064	1.22032e-96	2.02281e-94	up	1507	--	--	hypothetical protein TRIUR3_18801 [Triticum urartu]	O3L1_ARATH RecName: Full=Protein OXIDATIVE STRESS 3 LIKE 1 {ECO:0000303|PubMed:18980652}; Short=AtO3L1 {ECO:0000303|PubMed:18980652};	A0A453SQJ3_AEGTS SubName: Full=Uncharacterized protein {ECO:0000313|EnsemblPlants:AET7Gv21027400.1};	Nuclear localization sequence binding protein	GO:0005634,nucleus; GO:0016301,kinase activity; GO:0016310,phosphorylation; GO:0006979,response to oxidative stress; GO:0010043,response to zinc ion; GO:0003674,molecular_function; GO:0003824,catalytic activity; GO:0016740,transferase activity; GO:0016772,transferase activity, transferring phosphorus-containing groups; GO:0006793,phosphorus metabolic process; GO:0006796,phosphate-containing compo…	--	--	--	--
Cluster-102794.0	25.49	28.18	23.59	83.96	88.64	85.83	414	393	365	1102	1258	1126	1.65564	5.88908e-96	9.7207e-94	up	1222	--	--	hypothetical protein CFC21_071656 [Triticum aestivum]	DRMH3_ARATH RecName: Full=Dormancy-associated protein homolog 3 {ECO:0000305}; AltName: Full=DRM1 homolog 3 {ECO:0000305};	A0A3B6LMA7_WHEAT SubName: Full=Uncharacterized protein {ECO:0000313|EnsemblPlants:TraesCS5B02G212300.1};	--	--	Dormancy/auxin associated protein	--	--	--
Cluster-109263.0	17.1	16.91	17.16	37.11	34.72	35.21	1113	956	1089	2043	2045	1941	1.0204	9.00943e-96	1.484e-93	up	3509	K01609 indole-3-glycerol phosphate synthase [EC:4.1.1.48] | (RefSeq) indole-3-glycerol phosphate synthase, chloroplastic-like (A)	ko00400: Phenylalanine, tyrosine and tryptophan biosynthesis; ko01100: Metabolic pathways; ko01110: Biosynthesis of secondary metabolites; ko01230: Biosynthesis of amino acids	indole-3-glycerol phosphate synthase, chloroplastic [Aegilops tauschii subsp. strangulata]	TRPC_ARATH RecName: Full=Indole-3-glycerol phosphate synthase, chloroplastic {ECO:0000303|PubMed:7610197}; Short=IGPS {ECO:0000303|PubMed:7610197}; EC=4.1.1.48 {ECO:0000269|PubMed:7610197}; Flags: Precursor;	A0A453KIN6_AEGTS RecName: Full=Indole-3-glycerol-phosphate synthase {ECO:0000256|ARBA:ARBA00012362}; EC=4.1.1.48 {ECO:0000256|ARBA:ARBA00012362};	Anthranilate synthase component II	GO:0009507,chloroplast; GO:0009570,chloroplast stroma; GO:0005507,copper ion binding; GO:0004425,indole-3-glycerol-phosphate synthase activity; GO:0004640,phosphoribosylanthranilate isomerase activity; GO:0000162,tryptophan biosynthetic process; GO:0003674,molecular_function; GO:0005488,binding; GO:0043167,ion binding; GO:0043169,cation binding; GO:0046872,metal ion binding; GO:0046914,transition…	Indole-3-glycerol phosphate synthase	--	--	--
Cluster-79549.0	7.81	8.2	7.47	25.26	27.47	26.67	313	284	291	852	992	900	1.71228	1.18956e-95	1.9512e-93	up	1909	K01102 pyruvate dehydrogenase phosphatase [EC:3.1.3.43] | (RefSeq) probable protein phosphatase 2C 78 (A)	--	probable protein phosphatase 2C 29 [Triticum dicoccoides]	P2C29_ORYSJ RecName: Full=Probable protein phosphatase 2C 29; Short=OsPP2C29; EC=3.1.3.16;	A0A446SBV3_TRITD RecName: Full=Protein-serine/threonine phosphatase {ECO:0000256|ARBA:ARBA00013081}; EC=3.1.3.16 {ECO:0000256|ARBA:ARBA00013081};	Protein phosphatase 2C/pyruvate dehydrogenase (lipoamide) phosphatase	GO:0046872,metal ion binding; GO:0017018,myosin phosphatase activity; GO:0004722,protein serine/threonine phosphatase activity; GO:0035970,peptidyl-threonine dephosphorylation; GO:0003674,molecular_function; GO:0005488,binding; GO:0043167,ion binding; GO:0043169,cation binding; GO:0003824,catalytic activity; GO:0004721,phosphoprotein phosphatase activity; GO:0016787,hydrolase activity; GO:0016788…	Protein phosphatase 2C	--	--	--
Cluster-88975.3	1.09	0.73	0.74	14.92	18.2	14.65	43	24	28	496	647	487	4.18709	2.10421e-95	3.42283e-93	up	1886	K24193 MFS transporter, SP family, sugar:H+ symporter | (RefSeq) sugar transport protein 10-like (A)	--	hypothetical protein [Adiantum nelumboides]	HUP3_PARKE RecName: Full=H(+)/hexose cotransporter 3;	A0A5N6KU18_9ROSI RecName: Full=MFS domain-containing protein {ECO:0000259|PROSITE:PS50850};	Predicted transporter (major facilitator superfamily)	GO:0016021,integral component of membrane; GO:0015145,monosaccharide transmembrane transporter activity; GO:0015293,symporter activity; GO:0003674,molecular_function; GO:0005215,transporter activity; GO:0015144,carbohydrate transmembrane transporter activity; GO:0022857,transmembrane transporter activity; GO:0051119,sugar transmembrane transporter activity; GO:0015291,secondary active transmembra…	Sugar (and other) transporter	--	--	--
Cluster-110655.1	23.73	17.88	7.88	375.23	391.86	372.62	47	31	15	624	717	598	4.46743	2.34444e-95	3.80571e-93	up	376	--	--	--	--	--	--	--	--	--	--	--
Cluster-104008.10	254.59	228.34	252.36	74.03	68.65	60.95	1222	952	1173	295	297	239	-1.92036	1.85691e-94	2.99571e-92	down	498	K05953 nicotianamine synthase [EC:2.5.1.43] | (RefSeq) probable nicotianamine synthase 4 (A)	ko00270: Cysteine and methionine metabolism; ko00999: Biosynthesis of various plant secondary metabolites; ko01100: Metabolic pathways; ko01110: Biosynthesis of secondary metabolites	hypothetical protein CFC21_039553 [Triticum aestivum]	NAS2_HORVU RecName: Full=Probable nicotianamine synthase 2; EC=2.5.1.43; AltName: Full=HvNAS2; AltName: Full=S-adenosyl-L-methionine:S-adenosyl-L-methionine:S-adenosyl-methionine 3-amino-3-carboxypropyltransferase 2;	A0A3B6FIZ5_WHEAT RecName: Full=Nicotianamine synthase {ECO:0000256|RuleBase:RU368095}; EC=2.5.1.43 {ECO:0000256|RuleBase:RU368095};	--	GO:0030410,nicotianamine synthase activity; GO:0030418,nicotianamine biosynthetic process; GO:0003674,molecular_function; GO:0003824,catalytic activity; GO:0016740,transferase activity; GO:0016765,transferase activity, transferring alkyl or aryl (other than methyl) groups; GO:0006082,organic acid metabolic process; GO:0006576,cellular biogenic amine metabolic process; GO:0006807,nitrogen compound…	Nicotianamine synthase protein	--	--	--
Cluster-86709.0	75.43	78.33	75.36	20.77	23.75	26.19	1200	1079	1164	277	340	348	-1.74998	2.66614e-94	4.28358e-92	down	948	K00430 peroxidase [EC:1.11.1.7] | (RefSeq) peroxidase 2-like (A)	ko00940: Phenylpropanoid biosynthesis; ko01100: Metabolic pathways; ko01110: Biosynthesis of secondary metabolites	peroxidase 2 [Aegilops tauschii subsp. strangulata]	PER1_ARAHY RecName: Full=Cationic peroxidase 1; EC=1.11.1.7; AltName: Full=PNPC1; Flags: Precursor;	A0A453MXM7_AEGTS RecName: Full=PEROXIDASE_4 domain-containing protein {ECO:0000259|PROSITE:PS50873};	--	GO:0005576,extracellular region; GO:0020037,heme binding; GO:0046872,metal ion binding; GO:0004601,peroxidase activity; GO:0042744,hydrogen peroxide catabolic process; GO:0006979,response to oxidative stress; GO:0003674,molecular_function; GO:0005488,binding; GO:0046906,tetrapyrrole binding; GO:0097159,organic cyclic compound binding; GO:1901363,heterocyclic compound binding; GO:0043167,ion bindi…	Peroxidase	--	--	--
Cluster-119232.41	40.87	39.14	38.2	83.43	83.11	79.98	1138	943	1034	1954	2094	1877	1.01442	3.26689e-94	5.23805e-92	up	1621	no KO assigned | (RefSeq) beta-fructofuranosidase, insoluble isoenzyme 7-like (A)	--	fructan 6-exohydrolase-like isoform X1 [Triticum dicoccoides]	INV7_ORYSI RecName: Full=Beta-fructofuranosidase, insoluble isoenzyme 7; EC=3.2.1.26; AltName: Full=Cell wall beta-fructosidase 7; AltName: Full=Invertase 7; AltName: Full=OsCIN7; AltName: Full=Sucrose hydrolase 7; Flags: Precursor;	A0A446MRX7_TRITD SubName: Full=Uncharacterized protein {ECO:0000313|EMBL:VAH52552.1};	Beta-fructofuranosidase (invertase)	GO:0048046,apoplast; GO:0004564,beta-fructofuranosidase activity; GO:0005975,carbohydrate metabolic process; GO:0003674,molecular_function; GO:0003824,catalytic activity; GO:0004553,hydrolase activity, hydrolyzing O-glycosyl compounds; GO:0016787,hydrolase activity; GO:0016798,hydrolase activity, acting on glycosyl bonds; GO:0008150,biological_process; GO:0008152,metabolic process; GO:0044238,pri…	Glycosyl hydrolases family 32 N-terminal domain	--	--	--
Cluster-47419.0	4.25	4.99	4.81	24.36	26.84	23.12	143	145	157	689	813	654	2.3588	6.28817e-94	1.00412e-91	up	1651	K14709 solute carrier family 39 (zinc transporter), member 1/2/3 | (RefSeq) fe(2+) transport protein 1-like (A)	--	fe(2+) transport protein 1-like [Triticum dicoccoides]	IRT1_ORYSJ RecName: Full=Fe(2+) transport protein 1; AltName: Full=Fe(II) transport protein 1; AltName: Full=Iron-regulated transporter 1; Short=OsIRT1; Flags: Precursor;	A0A446RAG4_TRITD SubName: Full=Uncharacterized protein {ECO:0000313|EMBL:VAH95891.1};	Fe2+/Zn2+ regulated transporter	GO:0016021,integral component of membrane; GO:0016020,membrane; GO:0005886,plasma membrane; GO:0005385,zinc ion transmembrane transporter activity; GO:0015691,cadmium ion transport; GO:0055072,iron ion homeostasis; GO:0006826,iron ion transport; GO:0071577,zinc ion transmembrane transport; GO:0006829,zinc ion transport; GO:0003674,molecular_function; GO:0005215,transporter activity; GO:0008324,ca…	ZIP Zinc transporter	--	--	--
Cluster-126571.0	105.23	117.8	111.07	49.02	49.01	45.67	2055	1991	2107	804	863	748	-1.26625	1.2028e-93	1.91289e-91	down	1088	--	--	unnamed protein product [Triticum turgidum subsp. durum]	FLA11_ARATH RecName: Full=Fasciclin-like arabinogalactan protein 11; Flags: Precursor;	A0A446N6R0_TRITD RecName: Full=FAS1 domain-containing protein {ECO:0000259|PROSITE:PS50213};	--	GO:0031225,anchored component of membrane; GO:0005886,plasma membrane; GO:0009834,plant-type secondary cell wall biogenesis; GO:0008150,biological_process; GO:0009832,plant-type cell wall biogenesis; GO:0009987,cellular process; GO:0042546,cell wall biogenesis; GO:0044085,cellular component biogenesis; GO:0071554,cell wall organization or biogenesis; GO:0071669,plant-type cell wall organization o…	Fasciclin domain	--	--	--
Cluster-88938.0	3.18	3.53	2.69	17.11	17.42	17.57	130	125	107	589	642	605	2.42661	1.31535e-93	2.08765e-91	up	1942	K12817 pre-mRNA-splicing factor 18 | (RefSeq) pre-mRNA-splicing factor 18-like (A)	ko03040: Spliceosome	pre-mRNA-splicing factor 18 [Aegilops tauschii subsp. strangulata]	--	A0A3B6JE22_WHEAT RecName: Full=Pre-mRNA-splicing factor 18 {ECO:0000256|ARBA:ARBA00018242};	U5 snRNP-associated RNA splicing factor	GO:0071021,U2-type post-spliceosomal complex; GO:0046540,U4/U6 x U5 tri-snRNP complex; GO:0005682,U5 snRNP; GO:0000350,generation of catalytic spliceosome for second transesterification step; GO:0000375,RNA splicing, via transesterification reactions; GO:0000377,RNA splicing, via transesterification reactions with bulged adenosine as nucleophile; GO:0000393,spliceosomal conformational changes to …	Prp18 domain	--	--	--
Cluster-65637.1	1.27	1.25	1.31	17.85	18.39	15.6	39	33	39	461	509	403	3.71402	2.2099e-93	3.49329e-91	up	1542	--	--	--	--	--	--	--	--	--	--	--
Cluster-140293.0	21.5	20.02	20.03	51.54	46.9	50.76	904	728	819	1826	1778	1799	1.22969	7.0723e-93	1.1157e-90	up	1994	K15639 PHYB activation tagged suppressor 1 [EC:1.14.-.-] | (RefSeq) cytochrome P450 734A1-like (A)	ko00905: Brassinosteroid biosynthesis; ko01110: Biosynthesis of secondary metabolites	xylan glycosyltransferase MUCI21 [Aegilops tauschii subsp. strangulata]	MUC21_ARATH RecName: Full=Xylan glycosyltransferase MUCI21 {ECO:0000305}; EC=2.4.-.- {ECO:0000305|PubMed:26482889}; AltName: Full=Protein MUCILAGE-MODIFIED 5 {ECO:0000303|PubMed:11706181}; AltName: Full=Protein MUCILAGE-RELATED 21 {ECO:0000303|PubMed:26482889}; AltName: Full=Putative xylan xylosyltransgerase MUCI21 {ECO:0000303|PubMed:26979331};	A0A452XMX4_AEGTS SubName: Full=Uncharacterized protein {ECO:0000313|EnsemblPlants:AET1Gv20068600.2};	Uncharacterized conserved protein	GO:0005794,Golgi apparatus; GO:0000139,Golgi membrane; GO:0016021,integral component of membrane; GO:0047517,1,4-beta-D-xylan synthase activity; GO:0016757,glycosyltransferase activity; GO:0071555,cell wall organization; GO:0010192,mucilage biosynthetic process; GO:0048354,mucilage biosynthetic process involved in seed coat development; GO:0003674,molecular_function; GO:0003824,catalytic activity…	Glycosyltransferase 61	--	--	--
Cluster-113252.2	61.33	59.71	56.61	31.23	29.39	29.91	2564	2155	2302	1093	1109	1055	-1.02088	1.25427e-92	1.97472e-90	down	2041	K04077 chaperonin GroEL [EC:5.6.1.7] | (RefSeq) Chaperonine 60 (A)	ko03018: RNA degradation	ruBisCO large subunit-binding protein subunit alpha, chloroplastic [Triticum aestivum]	RUBA_WHEAT RecName: Full=RuBisCO large subunit-binding protein subunit alpha, chloroplastic; AltName: Full=60 kDa chaperonin subunit alpha; AltName: Full=CPN-60 alpha; Flags: Precursor; Fragment;	A0A3B6U2Z7_WHEAT SubName: Full=Uncharacterized protein {ECO:0000313|EnsemblPlants:TraesCSU02G009200.1};	Mitochondrial chaperonin, Cpn60/Hsp60p	GO:0009507,chloroplast; GO:0005524,ATP binding; GO:0140662,ATP-dependent protein folding chaperone; GO:0006457,protein folding; GO:0042026,protein refolding; GO:0000166,nucleotide binding; GO:0003674,molecular_function; GO:0005488,binding; GO:0017076,purine nucleotide binding; GO:0030554,adenyl nucleotide binding; GO:0032553,ribonucleotide binding; GO:0032555,purine ribonucleotide binding; GO:003…	TCP-1/cpn60 chaperonin family	--	--	--
Cluster-100729.4	23.97	27.83	25.15	61.02	61.11	66.32	1160	1165	1183	2488	2666	2706	1.24732	1.63721e-92	2.57245e-90	up	2243	K13424 WRKY transcription factor 33 | (RefSeq) WRKY transcription factor WRKY24-like (A)	ko04016: MAPK signaling pathway - plant; ko04626: Plant-pathogen interaction	WRKY transcription factor WRKY24-like [Triticum urartu]	WRK24_ORYSI RecName: Full=WRKY transcription factor WRKY24 {ECO:0000303|PubMed:16919842}; Short=OsWRKY24 {ECO:0000303|PubMed:16919842};	A0A453FUC2_AEGTS SubName: Full=Uncharacterized protein {ECO:0000313|EnsemblPlants:AET3Gv20784500.3};	--	GO:0005634,nucleus; GO:0003700,DNA-binding transcription factor activity; GO:0043565,sequence-specific DNA binding; GO:0009738,abscisic acid-activated signaling pathway; GO:0009740,gibberellic acid mediated signaling pathway; GO:0009788,negative regulation of abscisic acid-activated signaling pathway; GO:0009938,negative regulation of gibberellic acid mediated signaling pathway; GO:0045893,positi…	WRKY DNA -binding domain	WRKY	TF	WRKY
Cluster-103500.0	0.66	0.96	0.72	10.31	11.18	11.87	31	39	33	409	475	472	3.80154	1.68302e-92	2.63914e-90	up	2302	K00029 malate dehydrogenase (oxaloacetate-decarboxylating)(NADP+) [EC:1.1.1.40] | (RefSeq) NADP-dependent malic enzyme-like (A)	ko00620: Pyruvate metabolism; ko00710: Carbon fixation in photosynthetic organisms; ko01100: Metabolic pathways; ko01200: Carbon metabolism	NADP-dependent malic enzyme-like [Triticum urartu]	MAOX_PHAVU RecName: Full=NADP-dependent malic enzyme; Short=NADP-ME; EC=1.1.1.40;	A0A3B6GYC1_WHEAT RecName: Full=Malic enzyme {ECO:0000256|RuleBase:RU003426};	NADP+-dependent malic enzyme	GO:0005737,cytoplasm; GO:0004471,malate dehydrogenase (decarboxylating) (NAD+) activity; GO:0004473,malate dehydrogenase (decarboxylating) (NADP+) activity; GO:0046872,metal ion binding; GO:0051287,NAD binding; GO:0008948,oxaloacetate decarboxylase activity; GO:0006108,malate metabolic process; GO:0003674,molecular_function; GO:0003824,catalytic activity; GO:0004470,malic enzyme activity; GO:0016…	Malic enzyme, NAD binding domain	--	--	--
Cluster-126036.3	27.17	27.12	28.65	9.13	7.69	8.08	1070	929	1106	308	275	270	-1.77554	3.27528e-92	5.11551e-90	down	1981	K24976 Trk/Ktr/HKT type cation transporter | (RefSeq) cation transporter HKT8-like (A)	--	hypothetical protein ZWY2020_051492 [Hordeum vulgare]	HKT15_ORYSI RecName: Full=Cation transporter HKT1;5 {ECO:0000303|PubMed:16809061}; Short=OsHKT1;5 {ECO:0000303|PubMed:16809061}; AltName: Full=Cation transporter HKT8 {ECO:0000303|PubMed:12795699}; Short=OsHKT8 {ECO:0000303|PubMed:12795699};	A0A7D3QN11_HORVS SubName: Full=Sodium transporter {ECO:0000313|EMBL:QKE61103.1};	Na+/K+ transporter	GO:0016021,integral component of membrane; GO:0008324,cation transmembrane transporter activity; GO:0006813,potassium ion transport; GO:0006814,sodium ion transport; GO:0003674,molecular_function; GO:0005215,transporter activity; GO:0015075,ion transmembrane transporter activity; GO:0022857,transmembrane transporter activity; GO:0006810,transport; GO:0006811,ion transport; GO:0006812,cation trans…	Cation transport protein	--	--	--
Cluster-104732.2	7.06	6.26	7.83	71.06	59.06	59.72	74	56	79	622	558	521	3.11564	4.29674e-92	6.69753e-90	up	726	--	--	--	--	--	--	--	--	--	--	--
Cluster-51504.5	2.23	1.47	2.32	24.59	25.58	22.29	53	30	53	492	549	446	3.54056	4.49392e-92	6.99099e-90	up	1260	--	--	protein UPS3, mitochondrial-like [Quercus suber]	--	A0A5N6L673_9ROSI SubName: Full=Uncharacterized protein {ECO:0000313|EMBL:KAB8670405.1};	Predicted member of the intramitochondrial sorting protein family	--	PRELI-like family	--	--	--
Cluster-93814.10	17.11	16.55	15.82	72.38	55.23	62.59	421	394	472	1472	1353	1289	1.7641	2.43334e-91	3.74091e-89	up	1850	--	--	uncharacterized protein LOC112032653 [Quercus suber]	--	A0A7S2LSA1_9STRA SubName: Full=Hypothetical protein {ECO:0000313|EMBL:CAD9614768.1};	--	GO:0016832,aldehyde-lyase activity; GO:0005975,carbohydrate metabolic process; GO:0003674,molecular_function; GO:0003824,catalytic activity; GO:0016829,lyase activity; GO:0016830,carbon-carbon lyase activity; GO:0008150,biological_process; GO:0008152,metabolic process; GO:0044238,primary metabolic process; GO:0071704,organic substance metabolic process	Acetyltransferase (GNAT) domain	GNAT	TR	GNAT
Cluster-16715.5	4.5	4.56	4.22	24.81	26.39	21.44	159	134	136	739	836	642	2.4538	4.47262e-91	6.86253e-89	up	1839	--	--	--	--	--	--	--	--	--	--	--
Cluster-84438.0	14.18	15.1	15.28	37.92	35.16	35.31	740	692	766	1694	1670	1562	1.25031	6.33081e-91	9.67578e-89	up	2561	K05909 laccase [EC:1.10.3.2] | (RefSeq) laccase-7-like isoform X1 (A)	--	unnamed protein product [Triticum turgidum subsp. durum]	LAC7_ORYSJ RecName: Full=Laccase-7; EC=1.10.3.2; AltName: Full=Benzenediol:oxygen oxidoreductase 7; AltName: Full=Diphenol oxidase 7; AltName: Full=Urishiol oxidase 7; Flags: Precursor;	A0A446Q5E0_TRITD RecName: Full=Laccase {ECO:0000256|ARBA:ARBA00012297, ECO:0000256|RuleBase:RU361119}; EC=1.10.3.2 {ECO:0000256|ARBA:ARBA00012297, ECO:0000256|RuleBase:RU361119}; AltName: Full=Benzenediol:oxygen oxidoreductase {ECO:0000256|RuleBase:RU361119}; AltName: Full=Diphenol oxidase {ECO:0000256|RuleBase:RU361119}; AltName: Full=Urishiol oxidase {ECO:0000256|RuleBase:RU361119};	Multicopper oxidases	GO:0048046,apoplast; GO:0005507,copper ion binding; GO:0052716,hydroquinone:oxygen oxidoreductase activity; GO:0016491,oxidoreductase activity; GO:0046274,lignin catabolic process; GO:0003674,molecular_function; GO:0005488,binding; GO:0043167,ion binding; GO:0043169,cation binding; GO:0046872,metal ion binding; GO:0046914,transition metal ion binding; GO:0003824,catalytic activity; GO:0016679,oxi…	Multicopper oxidase	--	--	--
Cluster-12132.6	1.31	1.46	1.34	15.88	19.11	19.11	39	37	39	401	517	483	3.69071	7.0498e-91	1.07537e-88	up	1509	--	--	predicted protein [Hordeum vulgare subsp. vulgare]	--	F2DLJ8_HORVV SubName: Full=Predicted protein {ECO:0000313|EMBL:BAJ95969.1};	--	--	CFEM domain	--	--	--
Cluster-129999.4	30.21	34.68	31.89	73.92	73.8	74.01	876	871	899	1805	1931	1806	1.1504	2.49923e-90	3.79752e-88	up	1468	K08332 vacuolar protein 8 | (RefSeq) U-box domain-containing protein 2 (A)	--	U-box domain-containing protein 4 [Aegilops tauschii subsp. strangulata]	PUB45_ARATH RecName: Full=U-box domain-containing protein 45; EC=2.3.2.27; AltName: Full=Plant U-box protein 45; AltName: Full=RING-type E3 ubiquitin transferase PUB45 {ECO:0000305};	A0A453DP02_AEGTS SubName: Full=Uncharacterized protein {ECO:0000313|EnsemblPlants:AET3Gv20019700.1};	FOG: Armadillo/beta-catenin-like repeats	GO:0005737,cytoplasm; GO:0005634,nucleus; GO:0070696,transmembrane receptor protein serine/threonine kinase binding; GO:0004842,ubiquitin-protein transferase activity; GO:0016567,protein ubiquitination; GO:0003674,molecular_function; GO:0005102,signaling receptor binding; GO:0005488,binding; GO:0005515,protein binding; GO:0033612,receptor serine/threonine kinase binding; GO:0003824,catalytic acti…	Armadillo/beta-catenin-like repeat	--	--	--
Cluster-118513.3	120.8	112.45	105.17	37.29	34.4	31.22	1757	1411	1465	458	447	378	-1.76463	4.97249e-90	7.52642e-88	down	895	--	--	abscisic stress-ripening protein 5-like [Triticum dicoccoides]	ASR5_ORYSI RecName: Full=Abscisic stress-ripening protein 5 {ECO:0000305}; AltName: Full=OsAsr1 {ECO:0000303|Ref.1};	A0A446RXL3_TRITD SubName: Full=Uncharacterized protein {ECO:0000313|EMBL:VAI03544.1};	--	GO:0005737,cytoplasm; GO:0005634,nucleus; GO:0005575,cellular_component; GO:0005622,intracellular anatomical structure; GO:0110165,cellular anatomical entity; GO:0043226,organelle; GO:0043227,membrane-bounded organelle; GO:0043229,intracellular organelle; GO:0043231,intracellular membrane-bounded organelle	ABA/WDS induced protein	--	--	--
Cluster-138923.0	1.23	2.35	1.66	16.26	16.81	14.94	70	75	77	603	675	502	3.08454	1.09425e-88	1.6249e-86	up	5123	K12486 stromal membrane-associated protein | (RefSeq) probable ADP-ribosylation factor GTPase-activating protein AGD11 (A)	ko04144: Endocytosis	uncharacterized protein pyuk71.03c [Quercus suber]	SYT3_ARATH RecName: Full=Synaptotagmin-3; AltName: Full=NTMC2T1.3; AltName: Full=Synaptotagmin C;	A0A5N6KUW8_9ROSI SubName: Full=Uncharacterized protein {ECO:0000313|EMBL:KAB8342983.1};	Ca2+-dependent lipid-binding protein CLB1/vesicle protein vp115/Granuphilin A, contains C2 domain	GO:0005783,endoplasmic reticulum; GO:0016021,integral component of membrane; GO:0008289,lipid binding; GO:0046872,metal ion binding; GO:0006869,lipid transport; GO:0003674,molecular_function; GO:0005488,binding; GO:0043167,ion binding; GO:0043169,cation binding; GO:0006810,transport; GO:0008150,biological_process; GO:0010876,lipid localization; GO:0033036,macromolecule localization; GO:0051179,lo…	C2 domain	--	--	--
Cluster-81537.1	401.57	401.83	395.79	178.69	168.32	185.37	1384	1212	1330	517	532	527	-1.2301	1.22748e-88	1.81929e-86	down	489	K00430 peroxidase [EC:1.11.1.7] | (RefSeq) peroxidase 2-like (A)	ko00940: Phenylpropanoid biosynthesis; ko01100: Metabolic pathways; ko01110: Biosynthesis of secondary metabolites	predicted protein, partial [Hordeum vulgare subsp. vulgare]	PER70_MAIZE RecName: Full=Peroxidase 70; EC=1.11.1.7; AltName: Full=Plasma membrane-bound peroxidase 2b; Short=pmPOX2b; Flags: Precursor;	F2EKI0_HORVV RecName: Full=Peroxidase {ECO:0000256|RuleBase:RU362060}; EC=1.11.1.7 {ECO:0000256|RuleBase:RU362060}; Flags: Fragment;	--	GO:0005576,extracellular region; GO:0020037,heme binding; GO:0046872,metal ion binding; GO:0004601,peroxidase activity; GO:0042744,hydrogen peroxide catabolic process; GO:0006979,response to oxidative stress; GO:0003674,molecular_function; GO:0005488,binding; GO:0046906,tetrapyrrole binding; GO:0097159,organic cyclic compound binding; GO:1901363,heterocyclic compound binding; GO:0043167,ion bindi…	Peroxidase	--	--	--
Cluster-16403.13	14.23	14.1	15.08	85.11	71.08	56.9	705	605	727	1362	1495	1376	1.14208	3.03351e-88	4.47072e-86	up	2291	K05350 beta-glucosidase [EC:3.2.1.21] | (RefSeq) beta-glucosidase 16-like (A)	ko00460: Cyanoamino acid metabolism; ko00500: Starch and sucrose metabolism; ko00999: Biosynthesis of various plant secondary metabolites; ko01100: Metabolic pathways; ko01110: Biosynthesis of secondary metabolites	beta-glucosidase 16-like [Triticum urartu]	BGL16_ORYSJ RecName: Full=Beta-glucosidase 16 {ECO:0000303|PubMed:17196101}; Short=Os4bglu16 {ECO:0000303|PubMed:17196101}; EC=3.2.1.21 {ECO:0000269|PubMed:25219312}; Flags: Precursor;	M7YHH2_TRIUA RecName: Full=4-hydroxy-7-methoxy-3-oxo-3,4-dihydro-2H-1,4-benzoxazin-2-yl glucosidebeta-D-glucosidase {ECO:0000256|ARBA:ARBA00012857}; EC=3.2.1.182 {ECO:0000256|ARBA:ARBA00012857};	Beta-glucosidase, lactase phlorizinhydrolase, and related proteins	GO:0033907,beta-D-fucosidase activity; GO:0004565,beta-galactosidase activity; GO:0008422,beta-glucosidase activity; GO:0047782,coniferin beta-glucosidase activity; GO:0102483,scopolin beta-glucosidase activity; GO:0005975,carbohydrate metabolic process; GO:0033491,coniferin metabolic process; GO:0016137,glycoside metabolic process; GO:0003674,molecular_function; GO:0003824,catalytic activity; GO…	Glycosyl hydrolase family 1	--	--	--
Cluster-19239.4	0.55	0.28	0.76	14.79	14.43	12.79	20	9	27	473	494	409	4.70932	5.34898e-88	7.839e-86	up	1827	K01188 beta-glucosidase [EC:3.2.1.21] | (RefSeq) beta-glucosidase 12-like (A)	ko00460: Cyanoamino acid metabolism; ko00500: Starch and sucrose metabolism; ko00999: Biosynthesis of various plant secondary metabolites; ko01100: Metabolic pathways; ko01110: Biosynthesis of secondary metabolites	hypothetical protein [Adiantum nelumboides]	ISOA1_ORYSJ RecName: Full=Isoamylase 1, chloroplastic {ECO:0000305}; Short=OsISA1 {ECO:0000303|PubMed:15618430}; EC=3.2.1.68 {ECO:0000269|PubMed:10333591}; AltName: Full=Protein SUGARY-1 {ECO:0000303|PubMed:15618430}; Flags: Precursor;	A0A8J4SGN5_9STRA RecName: Full=Aamy domain-containing protein {ECO:0000259|SMART:SM00642};	Alpha-amylase	GO:0010368,chloroplast isoamylase complex; GO:0043033,isoamylase complex; GO:0019156,isoamylase activity; GO:0010021,amylopectin biosynthetic process; GO:0019252,starch biosynthetic process; GO:0005983,starch catabolic process; GO:0003674,molecular_function; GO:0003824,catalytic activity; GO:0004553,hydrolase activity, hydrolyzing O-glycosyl compounds; GO:0016787,hydrolase activity; GO:0016798,hy…	Alpha amylase, catalytic domain	--	--	--
Cluster-127561.3	19.55	19.47	21.54	46.81	49.74	51.05	778	671	834	1570	1786	1712	1.23758	5.52451e-88	8.08114e-86	up	1900	K19044 E3 ubiquitin-protein ligase XBAT32/33 [EC:2.3.2.27] | (RefSeq) probable E3 ubiquitin-protein ligase XBOS33 (A)	--	F-box protein PP2-A13-like [Triticum dicoccoides]	P2A13_ARATH RecName: Full=F-box protein PP2-A13; AltName: Full=Protein PHLOEM PROTEIN 2-LIKE A13; Short=AtPP2-A13; AltName: Full=SKP1-interacting partner 9;	R7W3R3_AEGTA RecName: Full=F-box domain-containing protein {ECO:0000259|PROSITE:PS50181};	--	GO:0005634,nucleus; GO:0016567,protein ubiquitination; GO:0006807,nitrogen compound metabolic process; GO:0008150,biological_process; GO:0008152,metabolic process; GO:0019538,protein metabolic process; GO:0032446,protein modification by small protein conjugation; GO:0036211,protein modification process; GO:0043170,macromolecule metabolic process; GO:0043412,macromolecule modification; GO:0044238,…	Phloem protein 2	--	--	--
Cluster-132794.0	9.24	8.61	10.28	41.22	45.85	40.98	186	150	201	697	832	692	2.13475	7.6617e-88	1.11865e-85	up	1112	--	--	--	--	--	--	--	--	--	--	--
Cluster-124040.0	2.38	2.48	2.23	18.52	17.46	15.45	88	78	79	573	577	477	2.81694	3.04783e-87	4.42529e-85	up	1855	K13223 indole-2-monooxygenase [EC:1.14.14.153] | (RefSeq) indole-2-monooxygenase-like (A)	ko00402: Benzoxazinoid biosynthesis; ko00999: Biosynthesis of various plant secondary metabolites; ko01100: Metabolic pathways; ko01110: Biosynthesis of secondary metabolites	unnamed protein product [Triticum turgidum subsp. durum]	C71C4_MAIZE RecName: Full=indole-2-monooxygenase; EC=1.14.14.153 {ECO:0000269|PubMed:9235894}; AltName: Full=Cytochrome P450 71C4; AltName: Full=Protein benzoxazineless 2;	A0A452Y0X2_AEGTS SubName: Full=Uncharacterized protein {ECO:0000313|EnsemblPlants:AET1Gv20246300.2};	Cytochrome P450 CYP2 subfamily	GO:0016021,integral component of membrane; GO:0016020,membrane; GO:0020037,heme binding; GO:0036190,indole-2-monooxygenase activity; GO:0005506,iron ion binding; GO:0016709,oxidoreductase activity, acting on paired donors, with incorporation or reduction of molecular oxygen, NAD(P)H as one donor, and incorporation of one atom of oxygen; GO:0003674,molecular_function; GO:0005488,binding; GO:004690…	Cytochrome P450	--	--	--
Cluster-132567.4	48.28	43.77	47.6	15.78	18.21	18.56	1848	1449	1771	508	628	598	-1.45848	8.89412e-87	1.28661e-84	down	1838	K19891 glucan endo-1,3-beta-glucosidase 1/2/3 [EC:3.2.1.39] | (RefSeq) glucan endo-1,3-beta-glucosidase 3-like (A)	ko00500: Starch and sucrose metabolism; ko01100: Metabolic pathways	glucan endo-1,3-beta-glucosidase 13-like [Triticum dicoccoides]	E1312_ARATH RecName: Full=Glucan endo-1,3-beta-glucosidase 12; EC=3.2.1.39; AltName: Full=(1->3)-beta-glucan endohydrolase 12; Short=(1->3)-beta-glucanase 12; AltName: Full=Beta-1,3-endoglucanase 12; Short=Beta-1,3-glucanase 12; Flags: Precursor;	A0A453A1A1_AEGTS RecName: Full=X8 domain-containing protein {ECO:0000259|SMART:SM00768};	--	GO:0031225,anchored component of membrane; GO:0046658,anchored component of plasma membrane; GO:0005576,extracellular region; GO:0042973,glucan endo-1,3-beta-D-glucosidase activity; GO:0005975,carbohydrate metabolic process; GO:0071555,cell wall organization; GO:0006952,defense response; GO:0003674,molecular_function; GO:0003824,catalytic activity; GO:0004553,hydrolase activity, hydrolyzing O-gly…	X8 domain	--	--	--
Cluster-121449.4	4.72	4	5.16	30.18	27.43	26.32	119	87	126	641	625	559	2.54903	1.20019e-86	1.73299e-84	up	1318	--	--	--	--	--	--	--	--	--	--	--
Cluster-60674.8	1000.36	949.07	986.97	517.34	452.08	493.98	2097	1736	1995	893	859	819	-1.09211	1.51512e-86	2.17969e-84	down	380	--	--	metallothionein-like protein 2C [Triticum urartu]	MT2C_ORYSI RecName: Full=Metallothionein-like protein 2C; AltName: Full=Class I metallothionein-like protein 2C; AltName: Full=OsMT-I-2c; AltName: Full=OsMT2b;	A0A453GX06_AEGTS SubName: Full=Uncharacterized protein {ECO:0000313|EnsemblPlants:AET3Gv21240700.7};	--	GO:0005829,cytosol; GO:0046872,metal ion binding; GO:0072593,reactive oxygen species metabolic process; GO:0003674,molecular_function; GO:0005488,binding; GO:0043167,ion binding; GO:0043169,cation binding; GO:0008150,biological_process; GO:0008152,metabolic process; GO:0009987,cellular process; GO:0044237,cellular metabolic process; GO:0005575,cellular_component; GO:0005622,intracellular anatomic…	--	--	--	--
Cluster-119419.3	1.39	1.4	1.54	13.77	12.74	12.39	53	46	57	448	444	403	3.14081	1.69286e-86	2.42649e-84	up	1853	K23677 MFS transporter, Spinster family, sphingosine-1-phosphate transporter | (RefSeq) probable sphingolipid transporter spinster homolog 2 (A)	--	uncharacterized MFS-type transporter C530.15c-like [Quercus suber]	SPNS1_ARATH RecName: Full=Probable sphingolipid transporter spinster homolog 1;	A0A5N6KRX4_9ROSI RecName: Full=MFS domain-containing protein {ECO:0000259|PROSITE:PS50850};	Synaptic vesicle transporter SVOP and related transporters (major facilitator superfamily)	GO:0016021,integral component of membrane; GO:0031902,late endosome membrane; GO:0005765,lysosomal membrane; GO:0016020,membrane; GO:0022857,transmembrane transporter activity; GO:0006869,lipid transport; GO:0003674,molecular_function; GO:0005215,transporter activity; GO:0006810,transport; GO:0008150,biological_process; GO:0010876,lipid localization; GO:0033036,macromolecule localization; GO:0051…	Major Facilitator Superfamily	--	--	--
Cluster-82882.0	16.44	16.14	16.98	50.57	52.98	52.94	300	255	301	775	872	810	1.60788	7.32573e-86	1.04242e-83	up	1037	--	--	NAC transcription factor 29 [Aegilops tauschii subsp. strangulata]	NAP1_SOLLC RecName: Full=NAC domain-containing protein 1 {ECO:0000303|PubMed:29760199}; Short=SlNAP1 {ECO:0000303|PubMed:29760199};	A0A453KBX2_AEGTS RecName: Full=NAC domain-containing protein {ECO:0000259|PROSITE:PS51005};	--	GO:0005634,nucleus; GO:0043565,sequence-specific DNA binding; GO:0010150,leaf senescence; GO:0031155,regulation of reproductive fruiting body development; GO:0006355,regulation of DNA-templated transcription; GO:0003674,molecular_function; GO:0003676,nucleic acid binding; GO:0003677,DNA binding; GO:0005488,binding; GO:0097159,organic cyclic compound binding; GO:1901363,heterocyclic compound bindi…	--	--	--	--
Cluster-91447.1	19.07	19.41	20.51	53.75	59.06	59.48	420	370	439	995	1173	1100	1.49686	7.8429e-86	1.11399e-83	up	1188	--	--	uncharacterized protein LOC123116250 [Triticum aestivum]	--	A0A3B6LN41_WHEAT SubName: Full=Uncharacterized protein {ECO:0000313|EnsemblPlants:TraesCS5B02G230800.1.cds1};	--	GO:0016021,integral component of membrane; GO:0005575,cellular_component; GO:0016020,membrane; GO:0031224,intrinsic component of membrane; GO:0110165,cellular anatomical entity	--	--	--	--
Cluster-105224.0	25.14	28.07	22.44	79.46	76.48	77.55	474	458	411	1258	1300	1226	1.57798	8.71676e-86	1.23587e-83	up	1061	--	--	uncharacterized protein LOC109777223 [Aegilops tauschii subsp. strangulata]	--	A0A453I7D5_AEGTS RecName: Full=VQ domain-containing protein {ECO:0000259|Pfam:PF05678};	--	GO:0051091,positive regulation of DNA-binding transcription factor activity; GO:0006139,nucleobase-containing compound metabolic process; GO:0006351,DNA-templated transcription; GO:0006355,regulation of DNA-templated transcription; GO:0006725,cellular aromatic compound metabolic process; GO:0006807,nitrogen compound metabolic process; GO:0008150,biological_process; GO:0008152,metabolic process; G…	VQ motif	--	--	--
Cluster-86646.5	1.3	1	1.34	7.19	6.61	6.6	141	94	141	657	645	604	2.43376	2.35759e-85	3.33058e-83	up	4644	--	--	--	--	--	--	--	--	--	--	--
Cluster-55002.0	13.15	12.44	12.54	0.69	0.77	0.83	452	370	419	20	24	24	-4.10199	3.95307e-85	5.56446e-83	down	1682	--	--	uncharacterized transporter C417.10-like [Quercus suber]	--	A0A5N6L3U5_9ROSI RecName: Full=MFS domain-containing protein {ECO:0000259|PROSITE:PS50850};	Permease of the major facilitator superfamily	GO:0016021,integral component of membrane; GO:0022857,transmembrane transporter activity; GO:0003674,molecular_function; GO:0005215,transporter activity; GO:0005575,cellular_component; GO:0016020,membrane; GO:0031224,intrinsic component of membrane; GO:0110165,cellular anatomical entity	Major Facilitator Superfamily	--	--	--
Cluster-37996.0	29.54	34.8	28.96	5.5	6.1	5.56	715	729	681	112	133	113	-2.48976	5.376e-85	7.52688e-83	down	1275	K05278 flavonol synthase [EC:1.14.20.6] | (RefSeq) flavonol synthase/flavanone 3-hydroxylase (A)	ko00941: Flavonoid biosynthesis; ko01100: Metabolic pathways; ko01110: Biosynthesis of secondary metabolites	protein SRG1-like [Triticum dicoccoides]	SRG1_ARATH RecName: Full=Protein SRG1; Short=AtSRG1; AltName: Full=Protein SENESCENCE-RELATED GENE 1;	A0A3B6MUL8_WHEAT RecName: Full=Fe2OG dioxygenase domain-containing protein {ECO:0000259|PROSITE:PS51471};	Iron/ascorbate family oxidoreductases	GO:0046872,metal ion binding; GO:0016682,oxidoreductase activity, acting on diphenols and related substances as donors, oxygen as acceptor; GO:0010150,leaf senescence; GO:0003674,molecular_function; GO:0005488,binding; GO:0043167,ion binding; GO:0043169,cation binding; GO:0003824,catalytic activity; GO:0016491,oxidoreductase activity; GO:0016679,oxidoreductase activity, acting on diphenols and re…	non-haem dioxygenase in morphine synthesis N-terminal	--	--	--
Cluster-120138.0	22.84	28.54	24.36	58.4	61.45	60.89	677	653	691	1380	1571	1452	1.20745	9.23817e-85	1.28653e-82	up	1789	--	--	uncharacterized protein LOC119349025 [Triticum dicoccoides]	--	A0A8I6WI80_HORVV SubName: Full=Uncharacterized protein {ECO:0000313|EnsemblPlants:HORVU.MOREX.r3.1HG0077120.1};	--	--	PDDEXK-like family of unknown function	--	--	--
Cluster-61973.0	37.38	37.09	38.32	17.07	14.67	14.7	1693	1453	1687	651	599	561	-1.32791	1.62183e-84	2.25061e-82	down	2118	K03319 divalent anion:Na+ symporter, DASS family | (RefSeq) hypothetical protein (A)	--	dicarboxylate transporter 1, chloroplastic-like [Triticum aestivum]	DIT1_SPIOL RecName: Full=Dicarboxylate transporter 1, chloroplastic; Short=SODIT1; AltName: Full=2-oxoglutarate/malate translocator; Flags: Precursor;	A0A3B6LIB8_WHEAT SubName: Full=Uncharacterized protein {ECO:0000313|EnsemblPlants:TraesCS5B02G105700.1};	--	GO:0009706,chloroplast inner membrane; GO:0016021,integral component of membrane; GO:0015139,alpha-ketoglutarate transmembrane transporter activity; GO:0015140,malate transmembrane transporter activity; GO:0015742,alpha-ketoglutarate transport; GO:0015743,malate transport; GO:0003674,molecular_function; GO:0005215,transporter activity; GO:0005310,dicarboxylic acid transmembrane transporter activi…	Sodium:sulfate symporter transmembrane region	--	--	--
Cluster-17601.5	1.46	1.73	1.66	15.94	16.25	12.85	61	63	68	566	618	457	3.17772	4.36627e-84	6.02706e-82	up	1996	--	--	hypothetical protein L1887_46579 [Cichorium endivia]	--	A0A2D4BX43_PYTIN RecName: Full=Nitric oxide dioxygenase {ECO:0000256|ARBA:ARBA00012229}; EC=1.14.12.17 {ECO:0000256|ARBA:ARBA00012229};	Globins and related hemoproteins	GO:0071949,FAD binding; GO:0020037,heme binding; GO:0046872,metal ion binding; GO:0008941,nitric oxide dioxygenase activity; GO:0019825,oxygen binding; GO:0005344,oxygen carrier activity; GO:0062197,cellular response to chemical stress; GO:0051409,response to nitrosative stress; GO:0000166,nucleotide binding; GO:0003674,molecular_function; GO:0005488,binding; GO:0036094,small molecule binding; GO…	Globin	--	--	--
Cluster-138557.0	25.57	22.68	25.37	56.66	53.17	54.5	1129	866	1089	2107	2116	2027	1.10941	6.61162e-84	9.11044e-82	up	2073	K07198 5'-AMP-activated protein kinase, catalytic alpha subunit [EC:2.7.11.11] | (RefSeq) CBL-interacting serine/threonine-protein kinase 1-like (A)	--	CBL-interacting protein kinase 9-like [Triticum dicoccoides]	CIPK9_ORYSJ RecName: Full=CBL-interacting protein kinase 9; EC=2.7.11.1; AltName: Full=OsCIPK09;	A0A453J148_AEGTS RecName: Full=Non-specific serine/threonine protein kinase {ECO:0000256|ARBA:ARBA00012513}; EC=2.7.11.1 {ECO:0000256|ARBA:ARBA00012513};	Serine/threonine protein kinase	GO:0005524,ATP binding; GO:0106310,protein serine kinase activity; GO:0004674,protein serine/threonine kinase activity; GO:0006468,protein phosphorylation; GO:0007165,signal transduction; GO:0000166,nucleotide binding; GO:0003674,molecular_function; GO:0005488,binding; GO:0017076,purine nucleotide binding; GO:0030554,adenyl nucleotide binding; GO:0032553,ribonucleotide binding; GO:0032555,purine …	Protein kinase domain	--	--	--
Cluster-105849.14	16.84	18.19	15.59	1.46	1.56	1.59	472	443	426	35	40	38	-3.48591	1.09933e-83	1.50951e-81	down	1447	--	--	uncharacterized protein LOC112002527 [Quercus suber]	--	A0A2K3DMY6_CHLRE SubName: Full=Uncharacterized protein {ECO:0000313|EMBL:PNW81899.1};	--	GO:0005576,extracellular region; GO:0005575,cellular_component; GO:0110165,cellular anatomical entity	--	--	--	--
Cluster-33562.1	16.36	13.72	13.57	2.42	1.75	2.34	685	560	595	96	73	93	-2.72187	1.16219e-83	1.59303e-81	down	2194	K23134 dolabradiene monooxygenase / zealexin A1 synthase [EC:1.14.14.159 1.14.14.160] | (RefSeq) zealexin A1 synthase (A)	--	zealexin A1 synthase-like [Triticum aestivum]	C71Z8_MAIZE RecName: Full=Zealexin A1 synthase {ECO:0000305}; EC=1.14.14.160 {ECO:0000269|PubMed:26471326}; AltName: Full=Cytochrome P450 71Z18 {ECO:0000303|PubMed:26471326};	A0A1D5V062_WHEAT SubName: Full=Genome assembly, chromosome: II {ECO:0000313|EMBL:SPT15667.1};	Cytochrome P450 CYP2 subfamily	GO:0016021,integral component of membrane; GO:0020037,heme binding; GO:0005506,iron ion binding; GO:0016709,oxidoreductase activity, acting on paired donors, with incorporation or reduction of molecular oxygen, NAD(P)H as one donor, and incorporation of one atom of oxygen; GO:0010333,terpene synthase activity; GO:0006952,defense response; GO:0051502,diterpene phytoalexin biosynthetic process; GO:…	Cytochrome P450	--	--	--
Cluster-45168.0	1.87	1.74	1.41	30.76	22.02	20.99	41	33	30	427	401	386	3.63323	1.56187e-83	2.13343e-81	up	1281	K04713 sphinganine C4-monooxygenase [EC:1.14.18.5] | (RefSeq) sphinganine C4-monooxygenase 1-like (A)	ko00600: Sphingolipid metabolism; ko01100: Metabolic pathways	hypothetical protein CFC21_060928 [Triticum aestivum]	SBH1_ARATH RecName: Full=Sphinganine C4-monooxygenase 1; EC=1.14.18.5 {ECO:0000269|PubMed:11297741}; AltName: Full=Sphingoid C4-hydroxylase 1; AltName: Full=Sphingoid base hydroxylase 1;	A0A3B6JG27_WHEAT RecName: Full=Aldehyde oxygenase (deformylating) {ECO:0000256|ARBA:ARBA00013146}; EC=4.1.99.5 {ECO:0000256|ARBA:ARBA00013146};	Sphingolipid hydroxylase	GO:0005783,endoplasmic reticulum; GO:0005789,endoplasmic reticulum membrane; GO:0005794,Golgi apparatus; GO:0016021,integral component of membrane; GO:0016020,membrane; GO:0005506,iron ion binding; GO:0016491,oxidoreductase activity; GO:0009640,photomorphogenesis; GO:0046520,sphingoid biosynthetic process; GO:0003674,molecular_function; GO:0005488,binding; GO:0043167,ion binding; GO:0043169,catio…	--	--	--	--
Cluster-140086.1	45.13	44.44	43.15	15.13	17.1	13.73	1201	1044	1144	352	418	322	-1.54924	1.68091e-83	2.29203e-81	down	1440	K26151 MFS transporter, NAG-T family, sugar:H+ symporter | (RefSeq) hypothetical protein (A)	--	UNC93-like protein 3 [Triticum aestivum]	UN933_ARATH RecName: Full=UNC93-like protein 3;	N1R308_AEGTA SubName: Full=Uncharacterized protein {ECO:0000313|EMBL:EMT14675.1, ECO:0000313|EnsemblPlants:EMT14675};	Predicted membrane protein	GO:0016021,integral component of membrane; GO:0005886,plasma membrane; GO:0055075,potassium ion homeostasis; GO:0008150,biological_process; GO:0042592,homeostatic process; GO:0048878,chemical homeostasis; GO:0050801,ion homeostasis; GO:0055065,metal ion homeostasis; GO:0055067,monovalent inorganic cation homeostasis; GO:0055080,cation homeostasis; GO:0065007,biological regulation; GO:0065008,regu…	Ion channel regulatory protein UNC-93	--	--	--
Cluster-40176.29	16.65	17.75	16.54	38.58	41.63	39.68	687	634	663	1341	1549	1380	1.19008	2.26166e-83	3.07857e-81	up	1958	K00128 aldehyde dehydrogenase (NAD+) [EC:1.2.1.3] | (RefSeq) benzaldehyde dehydrogenase, mitochondrial-like isoform X1 (A)	ko00010: Glycolysis / Gluconeogenesis; ko00053: Ascorbate and aldarate metabolism; ko00071: Fatty acid degradation; ko00280: Valine, leucine and isoleucine degradation; ko00310: Lysine degradation; ko00330: Arginine and proline metabolism; ko00340: Histidine metabolism; ko00380: Tryptophan metabolism; ko00410: beta-Alanine metabolism; ko00561: Glycerolipid metabolism; ko00620: Pyruvate metabolism…	aldehyde dehydrogenase [Quercus suber]	AL2B4_ARATH RecName: Full=Aldehyde dehydrogenase family 2 member B4, mitochondrial; Short=ALDH2a; EC=1.2.1.3; Flags: Precursor;	A0A2H4Z9T8_9BRYO SubName: Full=Aldehyde dehydrogenase 2F1 {ECO:0000313|EMBL:AUF72237.1};	Aldehyde dehydrogenase	GO:0005829,cytosol; GO:0005759,mitochondrial matrix; GO:0005739,mitochondrion; GO:0004029,aldehyde dehydrogenase (NAD+) activity; GO:0005524,ATP binding; GO:0043878,glyceraldehyde-3-phosphate dehydrogenase (NAD+) (non-phosphorylating) activity; GO:0003674,molecular_function; GO:0003824,catalytic activity; GO:0004030,aldehyde dehydrogenase [NAD(P)+] activity; GO:0016491,oxidoreductase activity; GO…	Aldehyde dehydrogenase family	--	--	--
Cluster-117169.0	12.84	14.91	13.28	1.22	0.96	0.68	459	464	458	34	29	20	-3.97489	2.66314e-83	3.61878e-81	down	1873	--	--	hypothetical protein FH972_021564 [Carpinus fangiana]	--	A0A5N6KPM7_9ROSI RecName: Full=MFS domain-containing protein {ECO:0000259|PROSITE:PS50850};	Synaptic vesicle transporter SVOP and related transporters (major facilitator superfamily)	GO:0016021,integral component of membrane; GO:0022857,transmembrane transporter activity; GO:0003674,molecular_function; GO:0005215,transporter activity; GO:0005575,cellular_component; GO:0016020,membrane; GO:0031224,intrinsic component of membrane; GO:0110165,cellular anatomical entity	Major Facilitator Superfamily	--	--	--
Cluster-41302.1	2.03	0.85	1.71	52.31	42.89	49.15	22	8	18	445	404	428	4.82747	3.49567e-83	4.73364e-81	up	741	--	--	hypothetical protein L1887_55818 [Cichorium endivia]	--	A0A6G0WS44_9STRA RecName: Full=Endo-1,4-beta-xylanase {ECO:0000256|ARBA:ARBA00012590, ECO:0000256|PROSITE-ProRule:PRU01097}; EC=3.2.1.8 {ECO:0000256|ARBA:ARBA00012590, ECO:0000256|PROSITE-ProRule:PRU01097};	--	GO:0031176,endo-1,4-beta-xylanase activity; GO:0045493,xylan catabolic process; GO:0003674,molecular_function; GO:0003824,catalytic activity; GO:0004553,hydrolase activity, hydrolyzing O-glycosyl compounds; GO:0016787,hydrolase activity; GO:0016798,hydrolase activity, acting on glycosyl bonds; GO:0097599,xylanase activity; GO:0000272,polysaccharide catabolic process; GO:0005975,carbohydrate metab…	Glycosyl hydrolases family 11	--	--	--
Cluster-121806.0	18.06	18.96	15.54	43.24	44.98	42.47	729	653	635	1455	1586	1434	1.23438	4.22339e-83	5.6994e-81	up	4258	--	--	hypothetical protein ZWY2020_002094 [Hordeum vulgare]	RITF1_ARATH RecName: Full=Protein RGF1 INDUCIBLE TRANSCRIPTION FACTOR 1 {ECO:0000303|PubMed:31801996};	M8ANH0_TRIUA SubName: Full=Uncharacterized protein {ECO:0000313|EMBL:EMS66630.1, ECO:0000313|EnsemblPlants:TRIUR3_12775-P1};	--	GO:0005634,nucleus; GO:0046872,metal ion binding; GO:0010078,maintenance of root meristem identity; GO:2000377,regulation of reactive oxygen species metabolic process; GO:2000280,regulation of root development; GO:0043434,response to peptide hormone; GO:0003674,molecular_function; GO:0005488,binding; GO:0043167,ion binding; GO:0043169,cation binding; GO:0007275,multicellular organism development;…	PLATZ transcription factor	PLATZ	TF	PLATZ
Cluster-128311.1	4.01	4.01	4.17	27.19	34.93	33.46	70	63	59	410	463	449	2.869	4.58165e-83	6.17224e-81	up	1372	K05765 cofilin | (RefSeq) actin-depolymerizing factor 3-like (A)	--	actin-depolymerizing factor 3-like [Triticum dicoccoides]	ADF3_ORYSJ RecName: Full=Actin-depolymerizing factor 3; Short=ADF-3; Short=OsADF3;	B5LQT1_HORVV SubName: Full=Actin depolymerization factor-like protein {ECO:0000313|EMBL:ACH70383.1}; SubName: Full=Adf2 {ECO:0000313|EMBL:ACH69772.1};	Actin depolymerizing factor	GO:0015629,actin cytoskeleton; GO:0005737,cytoplasm; GO:0051015,actin filament binding; GO:0030042,actin filament depolymerization; GO:0003674,molecular_function; GO:0003779,actin binding; GO:0005488,binding; GO:0005515,protein binding; GO:0008092,cytoskeletal protein binding; GO:0044877,protein-containing complex binding; GO:0006996,organelle organization; GO:0007010,cytoskeleton organization; G…	Cofilin/tropomyosin-type actin-binding protein	--	--	--
Cluster-109822.1	0.75	1.23	1.39	16.07	14.43	13.41	33	48	61	607	580	504	3.65684	5.69029e-83	7.65262e-81	up	2153	--	--	cytoskeletal signaling protein slm1-like [Quercus suber]	--	A0A5N6QCQ4_9ROSI RecName: Full=PH domain-containing protein {ECO:0000259|SMART:SM00233};	--	--	BAR-like domain	--	--	--
Cluster-20268.9	0.12	0.64	0.33	26.75	28.49	26.16	2	13	7	526	601	514	6.30287	1.21317e-82	1.62041e-80	up	1244	K19825 2-alkenal reductase (NADP+) [EC:1.3.1.102] | (RefSeq) 2-alkenal reductase (NADP(+)-dependent) (A)	--	NADP-dependent oxidoreductase RED1-like [Quercus suber]	DBR_TOBAC RecName: Full=2-alkenal reductase (NADP(+)-dependent); EC=1.3.1.102 {ECO:0000269|PubMed:17945329, ECO:0000269|Ref.3, ECO:0000269|Ref.4}; AltName: Full=Alkenal double bound reductase; AltName: Full=Allylic alcohol dehydrogenase 1 {ECO:0000303|PubMed:11117876}; Short=allyl-ADH1 {ECO:0000303|PubMed:11117876}; AltName: Full=Flavin-free double bond reductase {ECO:0000303|Ref.4}; Short=NtDBR;…	A0A5N6L4U4_9ROSI RecName: Full=PKS_ER domain-containing protein {ECO:0000259|SMART:SM00829};	Predicted NAD-dependent oxidoreductase	GO:0032440,2-alkenal reductase [NAD(P)+] activity; GO:0003674,molecular_function; GO:0003824,catalytic activity; GO:0016491,oxidoreductase activity; GO:0016627,oxidoreductase activity, acting on the CH-CH group of donors; GO:0016628,oxidoreductase activity, acting on the CH-CH group of donors, NAD or NADP as acceptor	N-terminal domain of oxidoreductase	--	--	--
Cluster-80787.1	22.61	29.46	21.79	113.76	117.54	102.05	334	377	313	1412	1568	1263	2.1274	2.92359e-82	3.88515e-80	up	899	--	--	hypothetical protein FVEG_07535 [Fusarium verticillioides 7600]	--	B4G0J0_MAIZE RecName: Full=CFEM domain-containing protein {ECO:0000259|SMART:SM00747};	--	--	CFEM domain	--	--	--
Cluster-96180.1	122.34	108.3	122.4	55.78	58.74	54.83	3395	2600	3301	1302	1469	1279	-1.10887	5.52507e-82	7.30511e-80	down	1417	K15283 solute carrier family 35, member E1 | (RefSeq) glucose-6-phosphate/phosphate translocator 2, chloroplastic-like (A)	--	unnamed protein product [Triticum turgidum subsp. durum]	GPT2_ARATH RecName: Full=Glucose-6-phosphate/phosphate translocator 2, chloroplastic {ECO:0000303|PubMed:15722468}; Short=AtGPT2 {ECO:0000303|PubMed:15722468}; Flags: Precursor;	A0A453BDA9_AEGTS RecName: Full=TPT domain-containing protein {ECO:0000259|Pfam:PF03151};	Glucose-6-phosphate/phosphate and phosphoenolpyruvate/phosphate antiporter	GO:0009507,chloroplast; GO:0031969,chloroplast membrane; GO:0005794,Golgi apparatus; GO:0016021,integral component of membrane; GO:0000325,plant-type vacuole; GO:0015297,antiporter activity; GO:0015152,glucose-6-phosphate transmembrane transporter activity; GO:0005315,inorganic phosphate transmembrane transporter activity; GO:0015120,phosphoglycerate transmembrane transporter activity; GO:0071917…	Protein gp45 of Bacteriophage A118	--	--	--
Cluster-79340.2	6.89	7.49	7.87	29.39	26.67	25.79	252	237	279	905	879	794	1.83355	1.38699e-81	1.83076e-79	up	1777	K03294 basic amino acid/polyamine antiporter, APA family | (RefSeq) amino acid-polyamine-organocation family (A)	--	uncharacterized amino-acid permease P7G5.06-like [Quercus suber]	CAAT9_ARATH RecName: Full=Cationic amino acid transporter 9, chloroplastic; Flags: Precursor;	A0A5N6KPD1_9ROSI RecName: Full=AA_permease domain-containing protein {ECO:0000259|Pfam:PF00324};	Amino acid transporters	GO:0031969,chloroplast membrane; GO:0016021,integral component of membrane; GO:0000325,plant-type vacuole; GO:0015171,amino acid transmembrane transporter activity; GO:0006865,amino acid transport; GO:0003674,molecular_function; GO:0005215,transporter activity; GO:0005342,organic acid transmembrane transporter activity; GO:0022857,transmembrane transporter activity; GO:0046943,carboxylic acid tra…	Amino acid permease	--	--	--
Cluster-23244.10	7.19	9.1	8.16	45.14	53.66	52.28	99	108	109	523	669	604	2.58792	2.3104e-81	3.03937e-79	up	860	K00384 thioredoxin reductase (NADPH) [EC:1.8.1.9] | (RefSeq) thioredoxin reductase 1-like (A)	ko00450: Selenocompound metabolism	germin-like protein 8-11 isoform X2 [Triticum aestivum]	GL811_ORYSJ RecName: Full=Germin-like protein 8-11; Flags: Precursor;	A0A453DP85_AEGTS RecName: Full=Germin-like protein {ECO:0000256|RuleBase:RU366015};	--	GO:0048046,apoplast; GO:0030145,manganese ion binding; GO:0003674,molecular_function; GO:0005488,binding; GO:0043167,ion binding; GO:0043169,cation binding; GO:0046872,metal ion binding; GO:0046914,transition metal ion binding; GO:0005575,cellular_component; GO:0005576,extracellular region; GO:0110165,cellular anatomical entity	Cupin	--	--	--
Cluster-113174.0	0.41	0	0.5	114	112.75	108.72	5	0	6	1170	1246	1112	8.41214	2.46877e-81	3.24228e-79	up	798	--	--	hypothetical protein [Adiantum nelumboides]	--	A0A5J4XWI8_9CHLO RecName: Full=NAD(P)H dehydrogenase (quinone) {ECO:0000256|ARBA:ARBA00012648}; EC=1.6.5.2 {ECO:0000256|ARBA:ARBA00012648}; Flags: Fragment;	Predicted flavoprotein	GO:0003955,NAD(P)H dehydrogenase (quinone) activity; GO:0003674,molecular_function; GO:0003824,catalytic activity; GO:0016491,oxidoreductase activity; GO:0016651,oxidoreductase activity, acting on NAD(P)H; GO:0016655,oxidoreductase activity, acting on NAD(P)H, quinone or similar compound as acceptor	NADPH-dependent FMN reductase	--	--	--
Cluster-41302.2	4.1	4.5	4.24	89.53	113.2	102.15	12	17	21	364	455	380	4.66611	4.32095e-81	5.637e-79	up	660	--	--	hypothetical protein L1887_55818 [Cichorium endivia]	--	A0A6G0WS44_9STRA RecName: Full=Endo-1,4-beta-xylanase {ECO:0000256|ARBA:ARBA00012590, ECO:0000256|PROSITE-ProRule:PRU01097}; EC=3.2.1.8 {ECO:0000256|ARBA:ARBA00012590, ECO:0000256|PROSITE-ProRule:PRU01097};	--	GO:0031176,endo-1,4-beta-xylanase activity; GO:0045493,xylan catabolic process; GO:0003674,molecular_function; GO:0003824,catalytic activity; GO:0004553,hydrolase activity, hydrolyzing O-glycosyl compounds; GO:0016787,hydrolase activity; GO:0016798,hydrolase activity, acting on glycosyl bonds; GO:0097599,xylanase activity; GO:0000272,polysaccharide catabolic process; GO:0005975,carbohydrate metab…	Glycosyl hydrolases family 11	--	--	--
Cluster-40176.31	28.82	31.52	31.48	9.38	8.59	8.21	794	751	843	217	213	190	-1.86041	1.13111e-80	1.46829e-78	down	1409	K00128 aldehyde dehydrogenase (NAD+) [EC:1.2.1.3] | (RefSeq) aldehyde dehydrogenase family 2 member B7, mitochondrial-like (A)	ko00010: Glycolysis / Gluconeogenesis; ko00053: Ascorbate and aldarate metabolism; ko00071: Fatty acid degradation; ko00280: Valine, leucine and isoleucine degradation; ko00310: Lysine degradation; ko00330: Arginine and proline metabolism; ko00340: Histidine metabolism; ko00380: Tryptophan metabolism; ko00410: beta-Alanine metabolism; ko00561: Glycerolipid metabolism; ko00620: Pyruvate metabolism…	aldehyde dehydrogenase [Quercus suber]	AL2B7_ARATH RecName: Full=Aldehyde dehydrogenase family 2 member B7, mitochondrial; Short=ALDH2b; EC=1.2.1.3; Flags: Precursor;	A0A7S3JPN1_9STRA SubName: Full=Hypothetical protein {ECO:0000313|EMBL:CAE0359393.1};	Aldehyde dehydrogenase	GO:0005759,mitochondrial matrix; GO:0005634,nucleus; GO:0004029,aldehyde dehydrogenase (NAD+) activity; GO:0043878,glyceraldehyde-3-phosphate dehydrogenase (NAD+) (non-phosphorylating) activity; GO:0003674,molecular_function; GO:0003824,catalytic activity; GO:0004030,aldehyde dehydrogenase [NAD(P)+] activity; GO:0016491,oxidoreductase activity; GO:0016620,oxidoreductase activity, acting on the al…	Aldehyde dehydrogenase family	--	--	--
Cluster-128146.1	44.65	42.79	39.41	17.79	17.03	17.98	1673	1387	1435	561	575	567	-1.31283	4.54394e-80	5.88872e-78	down	1806	K05929 phosphoethanolamine N-methyltransferase [EC:2.1.1.103] | (RefSeq) phosphomethylethanolamine N-methyltransferase-like (A)	ko00564: Glycerophospholipid metabolism	phosphomethylethanolamine N-methyltransferase-like isoform X2 [Triticum dicoccoides]	PEAM2_ARATH RecName: Full=Phosphomethylethanolamine N-methyltransferase; Short=AtPMEAMT; EC=2.1.1.-; AltName: Full=Phosphoethanolamine N-methyltransferase 2;	A0A3B5Y5S2_WHEAT RecName: Full=Methyltransf_11 domain-containing protein {ECO:0000259|Pfam:PF08241};	SAM-dependent methyltransferases	GO:0005737,cytoplasm; GO:0003729,mRNA binding; GO:0000234,phosphoethanolamine N-methyltransferase activity; GO:0052667,phosphomethylethanolamine N-methyltransferase activity; GO:0032259,methylation; GO:0006656,phosphatidylcholine biosynthetic process; GO:0003674,molecular_function; GO:0003676,nucleic acid binding; GO:0003723,RNA binding; GO:0005488,binding; GO:0097159,organic cyclic compound bind…	Methyltransferase domain	--	--	--
Cluster-133819.5	17.24	17.44	17.22	3.62	2.75	3.07	565	495	549	100	81	84	-2.51431	6.78572e-80	8.77945e-78	down	1619	K12818 ATP-dependent RNA helicase DHX8/PRP22 [EC:3.6.4.13] | (RefSeq) hypothetical protein (A)	ko03040: Spliceosome	unnamed protein product [Triticum turgidum subsp. durum]	ZIF1_ARATH RecName: Full=Protein ZINC INDUCED FACILITATOR 1;	A0A446TN33_TRITD RecName: Full=MFS domain-containing protein {ECO:0000259|PROSITE:PS50850};	Permease of the major facilitator superfamily	GO:0016021,integral component of membrane; GO:0009705,plant-type vacuole membrane; GO:0005886,plasma membrane; GO:0022821,solute:potassium antiporter activity; GO:0090333,regulation of stomatal closure; GO:0009624,response to nematode; GO:0010043,response to zinc ion; GO:0055069,zinc ion homeostasis; GO:0003674,molecular_function; GO:0005215,transporter activity; GO:0008324,cation transmembrane t…	Major Facilitator Superfamily	--	--	--
Cluster-141999.0	0.43	0.42	0.33	9.08	9.69	8.54	20	17	15	359	410	338	4.49667	1.60793e-79	2.07694e-77	up	2184	K14708 solute carrier family 26 (sodium-independent sulfate anion transporter), member 11 | (RefSeq) probable sulfate permease C3H7.02 (A)	--	sulfate permease 2-like, partial [Quercus suber]	SUT42_ARATH RecName: Full=Probable sulfate transporter 4.2;	A0A1D1Y0I0_9ARAE SubName: Full=Putative sulfate permease C3H7.02 {ECO:0000313|EMBL:JAT48154.1};	Sulfate/bicarbonate/oxalate exchanger SAT-1 and related transporters (SLC26 family)	GO:0005887,integral component of plasma membrane; GO:0015301,NA; GO:0008271,secondary active sulfate transmembrane transporter activity; GO:0015293,symporter activity; GO:0003674,molecular_function; GO:0005215,transporter activity; GO:0008509,anion transmembrane transporter activity; GO:0015075,ion transmembrane transporter activity; GO:0015103,inorganic anion transmembrane transporter activity; …	Sulfate permease family	--	--	--
Cluster-64851.11	19.43	18.81	18.73	3.97	3.57	3.66	551	461	516	94	91	87	-2.4022	4.7757e-79	6.13834e-77	down	1442	--	--	uncharacterized protein LOC119364205 [Triticum dicoccoides]	--	W5BFY8_WHEAT SubName: Full=Uncharacterized protein {ECO:0000313|EnsemblPlants:TraesCS2B02G310100.1};	--	--	Root cap	--	--	--
Cluster-101809.4	4.58	3.12	1.63	66.72	74.39	80.21	32	19	11	394	476	471	4.52265	1.57004e-78	2.00814e-76	up	591	K03809 NAD(P)H dehydrogenase (quinone) [EC:1.6.5.2] | (RefSeq) probable NAD(P)H dehydrogenase (quinone) FQR1-like 1 (A)	ko00130: Ubiquinone and other terpenoid-quinone biosynthesis; ko01100: Metabolic pathways; ko01110: Biosynthesis of secondary metabolites; ko01240: Biosynthesis of cofactors	quinone-oxidoreductase QR2 [Aegilops tauschii subsp. strangulata]	QR2_TRIVS RecName: Full=Quinone-oxidoreductase QR2 {ECO:0000303|PubMed:11260494}; Short=TvQR2 {ECO:0000303|PubMed:11260494}; EC=1.6.5.2 {ECO:0000269|Ref.2};	A0A1D5UTZ2_WHEAT RecName: Full=NAD(P)H dehydrogenase (quinone) {ECO:0000256|ARBA:ARBA00012648}; EC=1.6.5.2 {ECO:0000256|ARBA:ARBA00012648};	1,4-benzoquinone reductase-like; Trp repressor binding protein-like/protoplast-secreted protein	GO:0010181,FMN binding; GO:0050136,NADH dehydrogenase (quinone) activity; GO:0008753,NADPH dehydrogenase (quinone) activity; GO:0000166,nucleotide binding; GO:0003674,molecular_function; GO:0005488,binding; GO:0032553,ribonucleotide binding; GO:0036094,small molecule binding; GO:0043167,ion binding; GO:0043168,anion binding; GO:0097159,organic cyclic compound binding; GO:0097367,carbohydrate deri…	NADPH-dependent FMN reductase	--	--	--
Cluster-50682.9	17.26	18.26	16.77	44	38.94	42.67	854	782	807	1835	1737	1781	1.21853	1.6642e-78	2.12511e-76	up	2287	K20628 expansin | (RefSeq) expansin-B16 (A)	--	predicted protein, partial [Hordeum vulgare subsp. vulgare]	EXLA2_ORYSJ RecName: Full=Expansin-like A2; AltName: Full=OsEXLA2; AltName: Full=OsEXPL2; AltName: Full=OsaEXPb2.2; Flags: Precursor;	F2D7N2_HORVV SubName: Full=Predicted protein {ECO:0000313|EMBL:BAJ91103.1}; Flags: Fragment;	--	GO:0005576,extracellular region; GO:0009653,anatomical structure morphogenesis; GO:0008150,biological_process; GO:0032502,developmental process; GO:0048856,anatomical structure development; GO:0005575,cellular_component; GO:0110165,cellular anatomical entity	Expansin C-terminal domain	--	--	--
Cluster-131607.4	44.57	46.3	39.55	17.87	24.93	22.58	1404	1176	1338	560	573	544	-1.1366	2.4889e-78	3.16276e-76	down	1834	K22845 phlorizin synthase [EC:2.4.1.357] | (RefSeq) UDP-glycosyltransferase 88F3-like (A)	ko00941: Flavonoid biosynthesis; ko01110: Biosynthesis of secondary metabolites	UDP-glycosyltransferase 88F3-like [Triticum aestivum]	ANGLT_ROSHC RecName: Full=Anthocyanidin 5,3-O-glucosyltransferase; EC=2.4.1.-; AltName: Full=UDP-glucose: anthocyanidin 5,3-O-glucosyltransferase;	A0A3B5Z2G4_WHEAT RecName: Full=Glycosyltransferase {ECO:0000256|RuleBase:RU362057}; EC=2.4.1.- {ECO:0000256|RuleBase:RU362057};	UDP-glucuronosyl and UDP-glucosyl transferase	GO:0008194,UDP-glycosyltransferase activity; GO:0009718,anthocyanin-containing compound biosynthetic process; GO:0003674,molecular_function; GO:0003824,catalytic activity; GO:0016740,transferase activity; GO:0016757,glycosyltransferase activity; GO:0008150,biological_process; GO:0008152,metabolic process; GO:0009058,biosynthetic process; GO:0009812,flavonoid metabolic process; GO:0009813,flavonoi…	UDP-glucoronosyl and UDP-glucosyl transferase	--	--	--
Cluster-119759.3	6.9	7.75	6.76	20.56	19.66	20.37	367	357	362	924	956	913	1.44774	2.82853e-78	3.58273e-76	up	2928	K01097 N-acylneuraminate-9-phosphatase [EC:3.1.3.29] | (RefSeq) uncharacterized protein LOC116261997 (A)	ko00520: Amino sugar and nucleotide sugar metabolism; ko01100: Metabolic pathways; ko01250: Biosynthesis of nucleotide sugars	unnamed protein product [Triticum turgidum subsp. durum]	--	A0A446LZ09_TRITD SubName: Full=Uncharacterized protein {ECO:0000313|EMBL:VAH42851.1};	Predicted hydrolase (HAD superfamily)	--	Haloacid dehalogenase-like hydrolase	--	--	--
Cluster-47012.7	20.68	14.89	15.26	26.75	32.34	38.78	331	280	342	916	937	1019	1.68067	3.50398e-78	4.42398e-76	up	1935	--	--	uncharacterized protein LOC112000556 [Quercus suber]	--	--	--	--	Glycogen recognition site of AMP-activated protein kinase	--	--	--
Cluster-108209.0	68.67	65.28	62.41	2.97	2.56	2.24	445	367	392	16	15	12	-4.72009	6.45434e-78	8.09684e-76	down	566	--	--	--	--	--	--	--	--	--	--	--
Cluster-137410.0	1.63	0.79	1.19	23.53	19.5	23.62	42	17	28	487	426	486	4.10539	7.91433e-78	9.88094e-76	up	1777	--	--	outer envelope pore protein 16-2, chloroplastic [Hordeum vulgare]	OP162_ARATH RecName: Full=Outer envelope pore protein 16-2, chloroplastic; AltName: Full=Chloroplastic outer envelope pore protein of 16 kDa 2; Short=AtOEP16-2; Short=OEP16-2; AltName: Full=Outer plastid envelope protein 16-S; Short=AtOEP16-S; Short=Seeds outer plastid envelope protein 16;	M8B537_TRIUA SubName: Full=Uncharacterized protein {ECO:0000313|EMBL:EMS68749.1, ECO:0000313|EnsemblPlants:TRIUR3_14005-P1};	--	GO:0031359,integral component of chloroplast outer membrane; GO:0009527,plastid outer membrane; GO:0046930,pore complex; GO:0015171,amino acid transmembrane transporter activity; GO:0015288,porin activity; GO:0042803,protein homodimerization activity; GO:0006811,ion transport; GO:0003674,molecular_function; GO:0005215,transporter activity; GO:0005342,organic acid transmembrane transporter activit…	--	--	--	--
Cluster-126708.4	35.03	34.87	36.86	13.28	12.46	15.17	1459	1256	1492	465	468	532	-1.43297	2.43355e-77	3.01902e-75	down	1973	K01087 trehalose 6-phosphate phosphatase [EC:3.1.3.12] | (RefSeq) probable trehalose-phosphate phosphatase 1 (A)	ko00500: Starch and sucrose metabolism; ko01100: Metabolic pathways; ko01110: Biosynthesis of secondary metabolites	probable trehalose-phosphate phosphatase 1 [Aegilops tauschii subsp. strangulata]	TPP1_ORYSJ RecName: Full=Probable trehalose-phosphate phosphatase 1; Short=OsTPP1; EC=3.1.3.12; AltName: Full=Trehalose 6-phosphate phosphatase;	A0A453P8C6_AEGTS RecName: Full=Trehalose 6-phosphate phosphatase {ECO:0000256|RuleBase:RU361117}; EC=3.1.3.12 {ECO:0000256|RuleBase:RU361117};	Trehalose-6-phosphate synthase component TPS1 and related subunits	GO:0004805,trehalose-phosphatase activity; GO:0009409,response to cold; GO:0009651,response to salt stress; GO:0005992,trehalose biosynthetic process; GO:0003674,molecular_function; GO:0003824,catalytic activity; GO:0016787,hydrolase activity; GO:0016788,hydrolase activity, acting on ester bonds; GO:0016791,phosphatase activity; GO:0019203,carbohydrate phosphatase activity; GO:0042578,phosphoric …	Trehalose-phosphatase	--	--	--
Cluster-11426.8	1.31	1.42	1.3	6.63	7.21	8.24	119	112	115	524	610	647	2.44922	2.78239e-77	3.44634e-75	up	4063	K06911 quercetin 2,3-dioxygenase [EC:1.13.11.24] | (RefSeq) pirin-like protein At1g50590 (A)	--	pirin-like protein At1g50590 [Triticum dicoccoides]	PRNL1_ARATH RecName: Full=Pirin-like protein At1g50590;	A0A453L3W4_AEGTS SubName: Full=Uncharacterized protein {ECO:0000313|EnsemblPlants:AET5Gv20617100.7};	--	GO:0005634,nucleus; GO:0005575,cellular_component; GO:0005622,intracellular anatomical structure; GO:0043226,organelle; GO:0043227,membrane-bounded organelle; GO:0043229,intracellular organelle; GO:0043231,intracellular membrane-bounded organelle; GO:0110165,cellular anatomical entity	Pirin	--	--	--
Cluster-106936.8	20.11	21.19	22.48	0.71	0.53	0.82	419	382	455	12	10	14	-5.03785	3.21738e-77	3.97885e-75	down	1141	K00469 inositol oxygenase [EC:1.13.99.1] | (RefSeq) inositol oxygenase 4-like (A)	ko00053: Ascorbate and aldarate metabolism; ko00562: Inositol phosphate metabolism; ko01100: Metabolic pathways; ko01250: Biosynthesis of nucleotide sugars	hypothetical protein FH972_023093 [Carpinus fangiana]	MIOX_ORYSJ RecName: Full=Probable inositol oxygenase; EC=1.13.99.1; AltName: Full=Myo-inositol oxygenase; Short=MI oxygenase;	A0A5N6KUJ0_9ROSI RecName: Full=Inositol oxygenase {ECO:0000256|ARBA:ARBA00011919, ECO:0000256|RuleBase:RU367039}; EC=1.13.99.1 {ECO:0000256|ARBA:ARBA00011919, ECO:0000256|RuleBase:RU367039}; AltName: Full=Myo-inositol oxygenase {ECO:0000256|RuleBase:RU367039};	Aldehyde reductase	GO:0005737,cytoplasm; GO:0050113,inositol oxygenase activity; GO:0005506,iron ion binding; GO:0019310,inositol catabolic process; GO:0019853,L-ascorbic acid biosynthetic process; GO:0003674,molecular_function; GO:0003824,catalytic activity; GO:0004497,monooxygenase activity; GO:0016491,oxidoreductase activity; GO:0016701,oxidoreductase activity, acting on single donors with incorporation of molec…	Myo-inositol oxygenase	--	--	--
Cluster-25616.8	21.31	25.19	24.39	65.13	71.09	68.15	377	360	409	916	1055	970	1.44435	5.81579e-77	7.1809e-75	up	1451	--	--	--	--	A0A452ZS38_AEGTS SubName: Full=Uncharacterized protein {ECO:0000313|EnsemblPlants:AET1Gv20898200.1};	--	--	--	--	--	--
Cluster-111475.1	32.17	34.87	33.52	14.25	14.72	15.58	1404	1315	1424	526	579	576	-1.21648	7.32101e-77	9.02522e-75	down	2183	K00799 glutathione S-transferase [EC:2.5.1.18] | (RefSeq) probable glutathione S-transferase GSTU6 (A)	ko00480: Glutathione metabolism; ko01100: Metabolic pathways	unnamed protein product [Triticum turgidum subsp. durum]	GSTUH_ARATH RecName: Full=Glutathione S-transferase U17; Short=AtGSTU17; EC=2.5.1.18; AltName: Full=GST class-tau member 17; AltName: Full=Glutathione S-transferase 30; AltName: Full=Protein EARLY RESPONSIVE TO DEHYDRATION 9;	A0A446IXC0_TRITD RecName: Full=GST N-terminal domain-containing protein {ECO:0000259|PROSITE:PS50404};	Glutathione S-transferase	GO:0009507,chloroplast; GO:0005737,cytoplasm; GO:0005829,cytosol; GO:0004364,glutathione transferase activity; GO:0009704,de-etiolation; GO:0006749,glutathione metabolic process; GO:0048527,lateral root development; GO:0080148,negative regulation of response to water deprivation; GO:0040008,regulation of growth; GO:0060416,response to growth hormone; GO:0009651,response to salt stress; GO:0009407…	Domain of unknown function (DUF5671)	--	--	--
Cluster-124198.0	42.11	41.83	44.15	21.25	23.25	20.73	2299	1975	2343	977	1144	954	-1.01964	8.88957e-77	1.09417e-74	down	2490	K01807 ribose 5-phosphate isomerase A [EC:5.3.1.6] | (RefSeq) probable ribose-5-phosphate isomerase 2 (A)	ko00030: Pentose phosphate pathway; ko00710: Carbon fixation in photosynthetic organisms; ko01100: Metabolic pathways; ko01110: Biosynthesis of secondary metabolites; ko01200: Carbon metabolism; ko01230: Biosynthesis of amino acids	putative metal-nicotianamine transporter YSL9-like [Hordeum vulgare]	YSL9_ORYSJ RecName: Full=Probable metal-nicotianamine transporter YSL9; AltName: Full=Protein YELLOW STRIPE LIKE 9; Short=OsYSL9;	A0A8I6WGJ6_HORVV SubName: Full=Uncharacterized protein {ECO:0000313|EnsemblPlants:HORVU.MOREX.r3.2HG0185190.1};	--	GO:0016021,integral component of membrane; GO:0016020,membrane; GO:0005886,plasma membrane; GO:0051980,iron-nicotianamine transmembrane transporter activity; GO:0035673,oligopeptide transmembrane transporter activity; GO:0010039,response to iron ion; GO:0048316,seed development; GO:0003674,molecular_function; GO:0005215,transporter activity; GO:0015603,iron chelate transmembrane transporter activ…	OPT oligopeptide transporter protein	--	--	--
Cluster-15283.3	0.7	0.29	0.53	14.8	11.45	11.81	25	9	18	377	369	360	4.50339	1.36593e-76	1.67599e-74	up	1849	K08139 MFS transporter, SP family, sugar:H+ symporter | (RefSeq) high-affinity glucose transporter ght2-like (A)	--	alpha-glucosides permease mph2 [Quercus suber]	PLST4_ARATH RecName: Full=Plastidic glucose transporter 4; Short=AtpGlcT;	A0A0D6QRE2_ARACU RecName: Full=MFS domain-containing protein {ECO:0000259|PROSITE:PS50850};	Predicted transporter (major facilitator superfamily)	GO:0009941,chloroplast envelope; GO:0009706,chloroplast inner membrane; GO:0016021,integral component of membrane; GO:0016020,membrane; GO:0009536,plastid; GO:0005351,carbohydrate:proton symporter activity; GO:0008643,carbohydrate transport; GO:0003674,molecular_function; GO:0005215,transporter activity; GO:0005402,carbohydrate:cation symporter activity; GO:0008324,cation transmembrane transporte…	Sugar (and other) transporter	--	--	--
Cluster-110720.3	6.85	5.66	6.06	29.53	31.5	28.68	148	106	127	537	615	521	2.22234	2.62518e-76	3.20105e-74	up	1174	K13449 pathogenesis-related protein 1 | (RefSeq) pathogenesis-related protein 1-like (A)	ko04016: MAPK signaling pathway - plant; ko04075: Plant hormone signal transduction; ko04626: Plant-pathogen interaction	hypothetical protein FOXG_09795 [Fusarium oxysporum f. sp. lycopersici 4287]	PR1B_TOBAC RecName: Full=Pathogenesis-related protein 1B; Short=PR-1B; Flags: Precursor;	A0A386PWW5_DIOAL SubName: Full=Pathogenesis-related protein {ECO:0000313|EMBL:AYE39535.1};	Defense-related protein containing SCP domain	GO:0005615,extracellular space; GO:0005773,vacuole; GO:0006952,defense response; GO:0009607,response to biotic stimulus; GO:0006950,response to stress; GO:0008150,biological_process; GO:0050896,response to stimulus; GO:0005575,cellular_component; GO:0005576,extracellular region; GO:0110165,cellular anatomical entity; GO:0005622,intracellular anatomical structure; GO:0005737,cytoplasm; GO:0043226,…	Cysteine-rich secretory protein family	--	--	--
Cluster-90211.0	17.23	17.96	18.56	0.4	0.06	0.13	618	557	647	12	2	4	-6.57428	3.8288e-76	4.65421e-74	down	1741	--	--	--	--	--	--	--	--	--	--	--
Cluster-138144.0	90.26	88.13	82.38	30.92	30.52	34.32	1793	1499	1572	535	537	610	-1.44344	1.48184e-75	1.7902e-73	down	1333	K06699 proteasome activator subunit 4 | (RefSeq) hypothetical protein (A)	ko03050: Proteasome	LOW QUALITY PROTEIN: hypothetical protein CFC21_111742 [Triticum aestivum]	BURPB_ORYSJ RecName: Full=BURP domain-containing protein 11; Short=OsBURP11;	A0A3B6TML0_WHEAT RecName: Full=BURP domain-containing protein {ECO:0000259|PROSITE:PS51277};	--	--	BURP domain	--	--	--
Cluster-46097.3	23.47	23.25	23.54	8.89	8.02	7.73	903	749	871	279	288	262	-1.5179	1.57869e-75	1.90427e-73	down	2194	K26562 MFS transporter, POT/PTR family, peptide/nitrate/nicotianamine transporter | (RefSeq) protein NRT1/ PTR FAMILY 5.7-like (A)	--	unnamed protein product [Triticum turgidum subsp. durum]	PTR45_ARATH RecName: Full=Protein NRT1/ PTR FAMILY 5.7; Short=AtNPF5.7;	A0A446TLU0_TRITD SubName: Full=Uncharacterized protein {ECO:0000313|EMBL:VAI24325.1};	H+/oligopeptide symporter	GO:0016021,integral component of membrane; GO:0071916,dipeptide transmembrane transporter activity; GO:0042937,tripeptide transmembrane transporter activity; GO:0003674,molecular_function; GO:0005215,transporter activity; GO:0022857,transmembrane transporter activity; GO:0035673,oligopeptide transmembrane transporter activity; GO:0042887,amide transmembrane transporter activity; GO:1904680,peptid…	POT family	--	--	--
Cluster-104030.11	103.83	101.32	96.81	51.86	49.54	46.03	1981	1688	1798	825	862	741	-1.08481	2.21195e-75	2.65994e-73	down	1409	K14563 rRNA 2'-O-methyltransferase fibrillarin [EC:2.1.1.-] | (RefSeq) rRNA 2'-O-methyltransferase fibrillarin 1-like (A)	ko03008: Ribosome biogenesis in eukaryotes	rRNA 2'-O-methyltransferase fibrillarin 1-like [Triticum aestivum]	FBRL1_ARATH RecName: Full=rRNA 2'-O-methyltransferase fibrillarin 1; Short=AtFbr1 {ECO:0000303|PubMed:10806224}; Short=AtFib1 {ECO:0000303|PubMed:10829025}; EC=2.1.1.- {ECO:0000305|PubMed:10829025}; AltName: Full=Fibrillarin-like protein 1; AltName: Full=Histone-glutamine methyltransferase; AltName: Full=SKP1-interacting partner 7 {ECO:0000303|PubMed:11387208};	A0A3B6QL73_WHEAT SubName: Full=Uncharacterized protein {ECO:0000313|EnsemblPlants:TraesCS6D02G384500.1};	Fibrillarin and related nucleolar RNA-binding proteins	GO:0031428,box C/D RNP complex; GO:0005730,nucleolus; GO:0009536,plastid; GO:0032040,small-subunit processome; GO:1990259,histone-glutamine methyltransferase activity; GO:0003729,mRNA binding; GO:0003723,RNA binding; GO:0008649,rRNA methyltransferase activity; GO:0030515,snoRNA binding; GO:0000494,box C/D RNA 3'-end processing; GO:1990258,histone glutamine methylation; GO:0031167,rRNA methylation…	Fibrillarin	--	--	--
Cluster-127722.0	0.13	0.46	0.28	27.7	26.22	29.43	3	9	6	521	529	553	6.5629	2.75155e-75	3.30375e-73	up	1202	--	--	cold shock protein CS66-like [Aegilops tauschii subsp. strangulata]	DHN4_HORVU RecName: Full=Dehydrin DHN4; AltName: Full=B18;	A0A453G4I0_AEGTS SubName: Full=Uncharacterized protein {ECO:0000313|EnsemblPlants:AET3Gv20881700.1};	--	GO:0009415,response to water; GO:0001101,response to acid chemical; GO:0008150,biological_process; GO:0009628,response to abiotic stimulus; GO:0010035,response to inorganic substance; GO:0042221,response to chemical; GO:0050896,response to stimulus; GO:1901700,response to oxygen-containing compound	Dehydrin	--	--	--
Cluster-802.6	0.85	0.76	1	12.24	13.26	12.83	26	20	30	317	368	332	3.82912	7.24712e-75	8.63541e-73	up	1561	--	--	--	--	M8B5K6_AEGTA SubName: Full=Putative LRR receptor-like serine/threonine-protein kinase {ECO:0000313|EMBL:EMT08875.1, ECO:0000313|EnsemblPlants:EMT08875};	--	GO:0016021,integral component of membrane; GO:0005524,ATP binding; GO:0004672,protein kinase activity; GO:0006468,protein phosphorylation; GO:0000166,nucleotide binding; GO:0003674,molecular_function; GO:0005488,binding; GO:0017076,purine nucleotide binding; GO:0030554,adenyl nucleotide binding; GO:0032553,ribonucleotide binding; GO:0032555,purine ribonucleotide binding; GO:0032559,adenyl ribonuc…	--	--	--	--
Cluster-128822.12	32.09	32.49	32.09	15.65	15.45	13.2	2187	1915	2126	898	949	759	-1.17158	9.27345e-75	1.10331e-72	down	3033	K01810 glucose-6-phosphate isomerase [EC:5.3.1.9] | (RefSeq) glucose-6-phosphate isomerase 1, chloroplastic-like (A)	ko00010: Glycolysis / Gluconeogenesis; ko00030: Pentose phosphate pathway; ko00500: Starch and sucrose metabolism; ko00520: Amino sugar and nucleotide sugar metabolism; ko01100: Metabolic pathways; ko01110: Biosynthesis of secondary metabolites; ko01200: Carbon metabolism; ko01250: Biosynthesis of nucleotide sugars	glucose-6-phosphate isomerase 1, chloroplastic-like [Triticum aestivum]	G6PIP_ARATH RecName: Full=Glucose-6-phosphate isomerase 1, chloroplastic; Short=GPI 1; EC=5.3.1.9; AltName: Full=Phosphoglucose isomerase 1; Short=PGI 1; AltName: Full=Phosphohexose isomerase; Short=PHI; Flags: Precursor;	A0A453L0A3_AEGTS RecName: Full=Glucose-6-phosphate isomerase {ECO:0000256|ARBA:ARBA00011952, ECO:0000256|RuleBase:RU000612}; EC=5.3.1.9 {ECO:0000256|ARBA:ARBA00011952, ECO:0000256|RuleBase:RU000612};	Glucose-6-phosphate isomerase	GO:0009507,chloroplast; GO:0009941,chloroplast envelope; GO:0009570,chloroplast stroma; GO:0005829,cytosol; GO:0009536,plastid; GO:0097367,carbohydrate derivative binding; GO:0004347,glucose-6-phosphate isomerase activity; GO:0048029,monosaccharide binding; GO:0006094,gluconeogenesis; GO:0051156,glucose 6-phosphate metabolic process; GO:0006096,glycolytic process; GO:0009911,positive regulation o…	Phosphoglucose isomerase	--	--	--
Cluster-129575.0	1.81	1.45	1.43	17.09	15.62	14.47	53	36	40	423	415	358	3.30183	1.10574e-74	1.31356e-72	up	1486	--	--	predicted GPI-anchored protein 58 [Quercus suber]	--	--	--	--	--	--	--	--
Cluster-140086.0	40.09	41.57	43.6	15.92	15.06	16.71	1037	926	1094	345	348	363	-1.44615	1.2083e-74	1.43324e-72	down	1639	--	--	UNC93-like protein 3 [Aegilops tauschii subsp. strangulata]	UN933_ARATH RecName: Full=UNC93-like protein 3;	N1R308_AEGTA SubName: Full=Uncharacterized protein {ECO:0000313|EMBL:EMT14675.1, ECO:0000313|EnsemblPlants:EMT14675};	Predicted membrane protein	GO:0016021,integral component of membrane; GO:0005886,plasma membrane; GO:0055075,potassium ion homeostasis; GO:0008150,biological_process; GO:0042592,homeostatic process; GO:0048878,chemical homeostasis; GO:0050801,ion homeostasis; GO:0055065,metal ion homeostasis; GO:0055067,monovalent inorganic cation homeostasis; GO:0055080,cation homeostasis; GO:0065007,biological regulation; GO:0065008,regu…	--	--	--	--
Cluster-124666.3	56.8	51.03	52.69	15.51	11.04	14.57	1506	1171	1358	346	264	325	-2.01537	1.51873e-74	1.79873e-72	down	1368	--	--	uncharacterized protein LOC123044044 [Triticum aestivum]	--	A0A3B6C1U7_WHEAT SubName: Full=Uncharacterized protein {ECO:0000313|EnsemblPlants:TraesCS2B02G174500.1.cds1};	--	--	--	--	--	--
Cluster-33890.12	6.53	8.02	8.36	26.62	25.27	24.66	350	372	436	1205	1224	1117	1.69843	1.56043e-74	1.84533e-72	up	2457	K01188 beta-glucosidase [EC:3.2.1.21] | (RefSeq) beta-glucosidase 6 (A)	ko00460: Cyanoamino acid metabolism; ko00500: Starch and sucrose metabolism; ko00999: Biosynthesis of various plant secondary metabolites; ko01100: Metabolic pathways; ko01110: Biosynthesis of secondary metabolites	beta-glucosidase 6 [Triticum urartu]	BGL06_ORYSJ RecName: Full=Beta-glucosidase 6 {ECO:0000305}; Short=Os3bglu6 {ECO:0000303|PubMed:17196101}; EC=3.2.1.21 {ECO:0000269|PubMed:19587102}; Flags: Precursor;	A0A453IMR0_AEGTS RecName: Full=4-hydroxy-7-methoxy-3-oxo-3,4-dihydro-2H-1,4-benzoxazin-2-yl glucosidebeta-D-glucosidase {ECO:0000256|ARBA:ARBA00012857}; EC=3.2.1.182 {ECO:0000256|ARBA:ARBA00012857};	Beta-glucosidase, lactase phlorizinhydrolase, and related proteins	GO:0005576,extracellular region; GO:0033907,beta-D-fucosidase activity; GO:0004565,beta-galactosidase activity; GO:0080083,beta-gentiobiose beta-glucosidase activity; GO:0008422,beta-glucosidase activity; GO:0080079,cellobiose glucosidase activity; GO:0042973,glucan endo-1,3-beta-D-glucosidase activity; GO:0016798,hydrolase activity, acting on glycosyl bonds; GO:0102483,scopolin beta-glucosidase …	Glycosyl hydrolase family 1	--	--	--
Cluster-10646.5	2.27	3.01	2.81	30.23	35.66	32.14	30	35	36	340	432	361	3.56917	1.59559e-74	1.88407e-72	up	845	--	--	late embryogenesis abundant protein 6 [Aegilops tauschii subsp. strangulata]	--	A0A453QDA5_AEGTS SubName: Full=Uncharacterized protein {ECO:0000313|EnsemblPlants:AET7Gv20051400.1};	--	GO:0009793,embryo development ending in seed dormancy; GO:0000003,reproduction; GO:0003006,developmental process involved in reproduction; GO:0007275,multicellular organism development; GO:0008150,biological_process; GO:0009790,embryo development; GO:0009791,post-embryonic development; GO:0010154,fruit development; GO:0022414,reproductive process; GO:0032501,multicellular organismal process; GO:0…	Domain of unknown function (DUF6450)	--	--	--
Cluster-73811.0	1.58	2.14	2.31	14.77	15.44	16.03	52	61	74	410	459	445	2.89695	2.41324e-74	2.84099e-72	up	1626	--	--	uncharacterized protein LOC109738534 [Aegilops tauschii subsp. strangulata]	--	A0A453F0R5_AEGTS SubName: Full=Uncharacterized protein {ECO:0000313|EnsemblPlants:AET3Gv20535900.2};	--	--	--	--	--	--
Cluster-83003.0	0.83	1.01	0.81	18.03	16.71	16.38	19	20	18	347	345	315	4.22871	2.57744e-74	3.02975e-72	up	1223	K01785 aldose 1-epimerase [EC:5.1.3.3] | (RefSeq) uncharacterized protein LOC129307897 isoform X1 (A)	ko00010: Glycolysis / Gluconeogenesis; ko00052: Galactose metabolism; ko01100: Metabolic pathways; ko01110: Biosynthesis of secondary metabolites	hypothetical protein FH972_023459 [Carpinus fangiana]	--	A0A5N6KVM6_9ROSI SubName: Full=Uncharacterized protein {ECO:0000313|EMBL:KAB8349432.1};	Predicted mutarotase	GO:0030246,carbohydrate binding; GO:0016853,isomerase activity; GO:0005975,carbohydrate metabolic process; GO:0003674,molecular_function; GO:0005488,binding; GO:0003824,catalytic activity; GO:0008150,biological_process; GO:0008152,metabolic process; GO:0044238,primary metabolic process; GO:0071704,organic substance metabolic process	Aldose 1-epimerase	--	--	--
Cluster-127747.2	2.81	2.68	2.45	30.97	30.77	24.53	49	41	42	458	489	362	3.39459	3.50717e-74	4.11031e-72	up	1013	--	--	--	--	--	--	--	--	--	--	--
Cluster-131588.1	3.09	2.9	2.94	29.15	25.85	28.29	47	38	43	375	358	364	3.18825	3.84915e-74	4.50437e-72	up	922	K03809 NAD(P)H dehydrogenase (quinone) [EC:1.6.5.2] | (RefSeq) probable 1,4-benzoquinone reductase (A)	ko00130: Ubiquinone and other terpenoid-quinone biosynthesis; ko01100: Metabolic pathways; ko01110: Biosynthesis of secondary metabolites; ko01240: Biosynthesis of cofactors	hypothetical protein BT93_L5914 [Corymbia citriodora subsp. variegata]	QR2_TRIVS RecName: Full=Quinone-oxidoreductase QR2 {ECO:0000303|PubMed:11260494}; Short=TvQR2 {ECO:0000303|PubMed:11260494}; EC=1.6.5.2 {ECO:0000269|Ref.2};	M1UVW4_CYAM1 SubName: Full=Probable 1,4-benzoquinone reductase {ECO:0000313|EMBL:BAM82206.1};	1,4-benzoquinone reductase-like; Trp repressor binding protein-like/protoplast-secreted protein	GO:0010181,FMN binding; GO:0050136,NADH dehydrogenase (quinone) activity; GO:0008753,NADPH dehydrogenase (quinone) activity; GO:0000166,nucleotide binding; GO:0003674,molecular_function; GO:0005488,binding; GO:0032553,ribonucleotide binding; GO:0036094,small molecule binding; GO:0043167,ion binding; GO:0043168,anion binding; GO:0097159,organic cyclic compound binding; GO:0097367,carbohydrate deri…	NADPH-dependent FMN reductase	--	--	--
Cluster-20268.2	2.63	3.01	2.58	27.79	30.71	22.12	61	60	58	547	648	435	3.26693	4.23553e-74	4.94913e-72	up	1244	K19825 2-alkenal reductase (NADP+) [EC:1.3.1.102] | (RefSeq) 2-alkenal reductase (NADP(+)-dependent) (A)	--	NADP-dependent oxidoreductase RED1-like [Quercus suber]	DBR_TOBAC RecName: Full=2-alkenal reductase (NADP(+)-dependent); EC=1.3.1.102 {ECO:0000269|PubMed:17945329, ECO:0000269|Ref.3, ECO:0000269|Ref.4}; AltName: Full=Alkenal double bound reductase; AltName: Full=Allylic alcohol dehydrogenase 1 {ECO:0000303|PubMed:11117876}; Short=allyl-ADH1 {ECO:0000303|PubMed:11117876}; AltName: Full=Flavin-free double bond reductase {ECO:0000303|Ref.4}; Short=NtDBR;…	A0A5N6L4U4_9ROSI RecName: Full=PKS_ER domain-containing protein {ECO:0000259|SMART:SM00829};	Predicted NAD-dependent oxidoreductase	GO:0032440,2-alkenal reductase [NAD(P)+] activity; GO:0003674,molecular_function; GO:0003824,catalytic activity; GO:0016491,oxidoreductase activity; GO:0016627,oxidoreductase activity, acting on the CH-CH group of donors; GO:0016628,oxidoreductase activity, acting on the CH-CH group of donors, NAD or NADP as acceptor	N-terminal domain of oxidoreductase	--	--	--
Cluster-32552.6	26.97	29.12	29.19	12.42	11.75	12.58	1256	1173	1321	487	493	494	-1.26132	5.18821e-74	6.0443e-72	down	2170	K05894 12-oxophytodienoic acid reductase [EC:1.3.1.42] | (RefSeq) putative 12-oxophytodienoate reductase 5 (A)	ko00592: alpha-Linolenic acid metabolism; ko01100: Metabolic pathways; ko01110: Biosynthesis of secondary metabolites	12-oxophytodienoate reductase 1 [Hordeum vulgare]	OPR5_ORYSJ RecName: Full=Putative 12-oxophytodienoate reductase 5; EC=1.3.1.-; AltName: Full=OPDA-reductase 5; Short=OsOPR5;	F2DF92_HORVV SubName: Full=Predicted protein {ECO:0000313|EMBL:BAJ93763.1};	NADH:flavin oxidoreductase/12-oxophytodienoate reductase	GO:0010181,FMN binding; GO:0016491,oxidoreductase activity; GO:0006633,fatty acid biosynthetic process; GO:0009695,jasmonic acid biosynthetic process; GO:0031408,oxylipin biosynthetic process; GO:0000166,nucleotide binding; GO:0003674,molecular_function; GO:0005488,binding; GO:0032553,ribonucleotide binding; GO:0036094,small molecule binding; GO:0043167,ion binding; GO:0043168,anion binding; GO:0…	NADH:flavin oxidoreductase / NADH oxidase family	--	--	--
Cluster-130215.3	1.8	1.75	1.7	18.11	17.01	15	69	58	63	530	521	407	3.02623	1.09657e-73	1.26996e-71	up	1864	K01904 4-coumarate--CoA ligase [EC:6.2.1.12] | (RefSeq) probable CoA ligase CCL7 (A)	ko00130: Ubiquinone and other terpenoid-quinone biosynthesis; ko00940: Phenylpropanoid biosynthesis; ko01100: Metabolic pathways; ko01110: Biosynthesis of secondary metabolites	hypothetical protein FH972_023252 [Carpinus fangiana]	CCL7_HUMLU RecName: Full=Probable CoA ligase CCL7 {ECO:0000305|PubMed:23300257}; Short=HlCCL7 {ECO:0000303|PubMed:23300257}; EC=6.2.1.- {ECO:0000305|PubMed:23300257};	A0A5N6KV28_9ROSI SubName: Full=Uncharacterized protein {ECO:0000313|EMBL:KAB8346207.1};	Acyl-CoA synthetase	GO:0005829,cytosol; GO:0005524,ATP binding; GO:0016405,CoA-ligase activity; GO:0000166,nucleotide binding; GO:0003674,molecular_function; GO:0005488,binding; GO:0017076,purine nucleotide binding; GO:0030554,adenyl nucleotide binding; GO:0032553,ribonucleotide binding; GO:0032555,purine ribonucleotide binding; GO:0032559,adenyl ribonucleotide binding; GO:0035639,purine ribonucleoside triphosphate …	AMP-binding enzyme	--	--	--
Cluster-131782.3	11.09	12.09	10.29	98.91	75.61	64.1	209	198	189	1572	1290	1017	2.78735	1.215e-73	1.40504e-71	up	1064	K20547 basic endochitinase B [EC:3.2.1.14] | (RefSeq) chitinase 7 (A)	ko00520: Amino sugar and nucleotide sugar metabolism; ko01100: Metabolic pathways; ko04016: MAPK signaling pathway - plant	hypothetical protein E2562_002192 [Oryza meyeriana var. granulata]	CHI7_ORYSJ RecName: Full=Chitinase 7; EC=3.2.1.14 {ECO:0000269|PubMed:10890535}; AltName: Full=Class I chitinase d; Short=OsChia1d; AltName: Full=Pathogenesis related (PR)-3 chitinase 7; Flags: Precursor;	A0A6G1EEZ1_9ORYZ RecName: Full=Chitinase {ECO:0000256|ARBA:ARBA00012729}; EC=3.2.1.14 {ECO:0000256|ARBA:ARBA00012729};	Predicted chitinase	GO:0008061,chitin binding; GO:0004568,chitinase activity; GO:0016998,cell wall macromolecule catabolic process; GO:0006032,chitin catabolic process; GO:0050832,defense response to fungus; GO:0000272,polysaccharide catabolic process; GO:0003674,molecular_function; GO:0005488,binding; GO:0097367,carbohydrate derivative binding; GO:0003824,catalytic activity; GO:0004553,hydrolase activity, hydrolyzi…	Chitinase class I	--	--	--
Cluster-36900.19	18.83	15.02	16.45	55.5	57.49	54.47	346	239	294	857	953	840	1.68181	1.78894e-73	2.06267e-71	up	1043	K23452 UDP-glucosyltransferase 85A [EC:2.4.1.-] | (RefSeq) UDP-glycosyltransferase 85A1-like (A)	ko00908: Zeatin biosynthesis; ko01110: Biosynthesis of secondary metabolites	7-deoxyloganetin glucosyltransferase-like [Triticum dicoccoides]	UGT2_GARJA RecName: Full=7-deoxyloganetin glucosyltransferase; EC=2.4.1.324; AltName: Full=Genipin glucosyltransferase; AltName: Full=UDP-glucose glucosyltransferase 2; Short=GjUGT2; AltName: Full=UDP-glycosyltransferase 85A24;	A0A3B6PQW2_WHEAT RecName: Full=Glycosyltransferase {ECO:0000256|RuleBase:RU362057}; EC=2.4.1.- {ECO:0000256|RuleBase:RU362057};	UDP-glucuronosyl and UDP-glucosyl transferase	GO:0035251,UDP-glucosyltransferase activity; GO:0003674,molecular_function; GO:0003824,catalytic activity; GO:0008194,UDP-glycosyltransferase activity; GO:0016740,transferase activity; GO:0016757,glycosyltransferase activity; GO:0016758,hexosyltransferase activity; GO:0046527,glucosyltransferase activity	--	--	--	--
Cluster-134623.2	4.39	5.48	4.06	17.92	19.07	16.92	170	119	154	593	676	558	2.13258	2.27482e-73	2.61905e-71	up	1885	K23948 NADH:quinone reductase (non-electrogenic) [EC:1.6.5.9] | (RefSeq) 2-nitropropane dioxygenase, NPD (A)	--	nitronate monooxygenase-like [Quercus suber]	--	A0A5N6KP23_9ROSI RecName: Full=NMO domain-containing protein {ECO:0000259|Pfam:PF03060};	--	GO:0018580,nitronate monooxygenase activity; GO:0003674,molecular_function; GO:0003824,catalytic activity; GO:0004497,monooxygenase activity; GO:0016491,oxidoreductase activity; GO:0016701,oxidoreductase activity, acting on single donors with incorporation of molecular oxygen; GO:0016703,oxidoreductase activity, acting on single donors with incorporation of molecular oxygen, incorporation of one …	SCP-2 sterol transfer family	--	--	--
Cluster-72058.10	8.46	10.42	7.14	42.88	47.76	43.4	169	181	139	723	864	731	2.32316	2.57215e-73	2.95703e-71	up	1110	K03263 translation initiation factor 5A | (RefSeq) eukaryotic translation initiation factor 5A-2 (A)	--	uncharacterized protein LOC112026878 [Quercus suber]	IF5A_MANES RecName: Full=Eukaryotic translation initiation factor 5A; Short=eIF-5A;	A0A7S3JQ74_9STRA SubName: Full=Hypothetical protein {ECO:0000313|EMBL:CAE0359781.1};	Translation initiation factor 5A (eIF-5A)	GO:0043022,ribosome binding; GO:0003723,RNA binding; GO:0003746,translation elongation factor activity; GO:0003743,translation initiation factor activity; GO:0045901,positive regulation of translational elongation; GO:0045905,positive regulation of translational termination; GO:0003674,molecular_function; GO:0005488,binding; GO:0043021,ribonucleoprotein complex binding; GO:0044877,protein-contain…	--	--	--	--
Cluster-117707.1	2.14	2.48	3.54	137.57	139.91	115.11	8	8	13	432	479	355	5.53256	3.69728e-73	4.24429e-71	up	456	--	--	--	--	--	--	--	--	--	--	--
Cluster-87891.2	25.6	25.61	22.87	0.22	0.42	0	743	643	645	5	10	0	-6.99675	8.11195e-73	9.27139e-71	down	1469	--	--	bZIP-CPC1 [Broussonetia papyrifera]	--	--	Transcriptional activator of the JUN family	--	Basic region leucine zipper	bZIP	TF	bZIP
Cluster-87267.0	32.04	31.71	30.58	14.97	14.2	14.71	1314	1125	1219	517	525	508	-1.1518	2.43203e-72	2.76352e-70	down	1947	K20619 cytochrome P450 family 78 subfamily A | (RefSeq) cytochrome P450 78A6-like (A)	--	cytochrome P450 78A6-like [Triticum aestivum]	C78A9_ARATH RecName: Full=Cytochrome P450 78A9; EC=1.14.-.-;	A0A3B6JN26_WHEAT SubName: Full=Uncharacterized protein {ECO:0000313|EnsemblPlants:TraesCS4D02G327400.1};	Cytochrome P450 CYP2 subfamily	GO:0016021,integral component of membrane; GO:0020037,heme binding; GO:0005506,iron ion binding; GO:0004497,monooxygenase activity; GO:0016705,oxidoreductase activity, acting on paired donors, with incorporation or reduction of molecular oxygen; GO:0010154,fruit development; GO:0040008,regulation of growth; GO:0048316,seed development; GO:0003674,molecular_function; GO:0005488,binding; GO:0046906…	Cytochrome P450	--	--	--
Cluster-108049.1	1.57	1.65	1.27	10.63	12.07	11.31	74	78	58	445	484	426	2.77161	2.67832e-72	3.03899e-70	up	2789	--	--	HECT-type ubiquitin ligase-interacting protein creD-like [Quercus suber]	--	A0A5N6QCQ4_9ROSI RecName: Full=PH domain-containing protein {ECO:0000259|SMART:SM00233};	Thioredoxin binding protein TBP-2/VDUP1	--	Arrestin (or S-antigen), C-terminal domain	--	--	--
Cluster-72040.7	287.24	258.94	254.56	69.86	71.71	59.03	850	667	728	171	192	141	-2.06808	4.84734e-72	5.49214e-70	down	420	--	--	--	--	--	--	--	--	--	--	--
Cluster-53019.1	0.54	0.51	0.78	6.38	5.97	5.82	40	32	56	401	402	367	3.28178	8.62074e-72	9.72531e-70	up	3294	K03380 phenol 2-monooxygenase (NADPH) [EC:1.14.13.7] | (RefSeq) phenol 2-monooxygenase-like (A)	--	aromatic hydroxylase fmpF-like [Quercus suber]	--	A0A5N6KSN6_9ROSI SubName: Full=Uncharacterized protein {ECO:0000313|EMBL:KAB8342795.1};	Monooxygenase involved in coenzyme Q (ubiquinone) biosynthesis	GO:0071949,FAD binding; GO:0000166,nucleotide binding; GO:0003674,molecular_function; GO:0005488,binding; GO:0036094,small molecule binding; GO:0043167,ion binding; GO:0043168,anion binding; GO:0050660,flavin adenine dinucleotide binding; GO:0097159,organic cyclic compound binding; GO:1901265,nucleoside phosphate binding; GO:1901363,heterocyclic compound binding	FAD binding domain	--	--	--
Cluster-98494.1	2.33	2.37	2.52	24.18	23.69	18.08	62	55	66	550	578	411	3.15673	1.05626e-71	1.18817e-69	up	1399	K09841 xanthoxin dehydrogenase [EC:1.1.1.288] | (RefSeq) zerumbone synthase-like (A)	ko00906: Carotenoid biosynthesis; ko01100: Metabolic pathways; ko01110: Biosynthesis of secondary metabolites	dehydrogenase RED2-like [Quercus suber]	ADH1_EUPLT RecName: Full=Short chain aldehyde dehydrogenase 1 {ECO:0000303|PubMed:27506796}; Short=ElADH1 {ECO:0000303|PubMed:27506796}; EC=1.1.1.1 {ECO:0000255|PROSITE-ProRule:PRU10001}; AltName: Full=Jolkinol C synthase {ECO:0000305|PubMed:27506796}; EC=1.1.1.- {ECO:0000269|PubMed:27506796};	A0A5N6L165_9ROSI SubName: Full=Uncharacterized protein {ECO:0000313|EMBL:KAB8532542.1};	Hydroxysteroid 17-beta dehydrogenase 11	GO:0016491,oxidoreductase activity; GO:0016114,terpenoid biosynthetic process; GO:0003674,molecular_function; GO:0003824,catalytic activity; GO:0006629,lipid metabolic process; GO:0006720,isoprenoid metabolic process; GO:0006721,terpenoid metabolic process; GO:0008150,biological_process; GO:0008152,metabolic process; GO:0008299,isoprenoid biosynthetic process; GO:0008610,lipid biosynthetic proces…	short chain dehydrogenase	--	--	--
Cluster-86941.0	20.95	23.29	22.7	0.12	0.42	0.08	605	582	637	3	11	2	-6.7503	1.0776e-71	1.21044e-69	down	1462	--	--	uncharacterized protein LOC112002527 [Quercus suber]	--	A0A2K3DMY6_CHLRE SubName: Full=Uncharacterized protein {ECO:0000313|EMBL:PNW81899.1};	--	GO:0005576,extracellular region; GO:0005575,cellular_component; GO:0110165,cellular anatomical entity	--	--	--	--
Cluster-131574.1	7.9	7.31	8.93	0.25	0.16	0.31	482	378	525	7	6	14	-5.58827	1.34663e-71	1.51048e-69	down	2795	K00033 6-phosphogluconate dehydrogenase [EC:1.1.1.44 1.1.1.343] | (RefSeq) 6-phosphogluconate dehydrogenase, decarboxylating 1-like (A)	ko00030: Pentose phosphate pathway; ko00480: Glutathione metabolism; ko01100: Metabolic pathways; ko01110: Biosynthesis of secondary metabolites; ko01200: Carbon metabolism	6-phosphogluconate dehydrogenase, decarboxylating-like [Quercus suber]	6PGD1_ORYSJ RecName: Full=6-phosphogluconate dehydrogenase, decarboxylating 1; Short=OsG6PGH1; EC=1.1.1.44;	A0A835URH3_VANPL RecName: Full=6-phosphogluconate dehydrogenase, decarboxylating {ECO:0000256|RuleBase:RU000485}; EC=1.1.1.44 {ECO:0000256|RuleBase:RU000485};	6-phosphogluconate dehydrogenase	GO:0005829,cytosol; GO:0050661,NADP binding; GO:0004616,phosphogluconate dehydrogenase (decarboxylating) activity; GO:0046177,D-gluconate catabolic process; GO:0009051,pentose-phosphate shunt, oxidative branch; GO:0009737,response to abscisic acid; GO:0009409,response to cold; GO:0009651,response to salt stress; GO:0009414,response to water deprivation; GO:0000166,nucleotide binding; GO:0003674,m…	6-phosphogluconate dehydrogenase, C-terminal domain	--	--	--
Cluster-95939.0	17.12	18.56	19.23	7.01	6.39	6.55	825	742	862	248	262	265	-1.56148	1.72436e-71	1.9314e-69	down	2251	K03283 heat shock 70kDa protein 1/6/8 | (RefSeq) heat shock 70 kDa protein (A)	ko03040: Spliceosome; ko04141: Protein processing in endoplasmic reticulum; ko04144: Endocytosis	heat shock 70 kDa protein [Pinus sylvestris]	HSP70_ACHKL RecName: Full=Heat shock 70 kDa protein;	A0A835YMX4_9STRA SubName: Full=Heat shock protein 70 {ECO:0000313|EMBL:KAG5177433.1};	Molecular chaperones HSP70/HSC70, HSP70 superfamily	GO:0005524,ATP binding; GO:0140662,ATP-dependent protein folding chaperone; GO:0000166,nucleotide binding; GO:0003674,molecular_function; GO:0005488,binding; GO:0017076,purine nucleotide binding; GO:0030554,adenyl nucleotide binding; GO:0032553,ribonucleotide binding; GO:0032555,purine ribonucleotide binding; GO:0032559,adenyl ribonucleotide binding; GO:0035639,purine ribonucleoside triphosphate …	Hsp70 protein	--	--	--
Cluster-61855.0	12.6	13.73	14.41	5.01	5.07	5.09	1035	976	1151	347	376	353	-1.46986	1.76354e-71	1.97247e-69	down	3627	K00924 kinase [EC:2.7.1.-] | (RefSeq) hypothetical protein (A)	--	receptor protein-tyrosine kinase CEPR2-like [Triticum aestivum]	CEPR2_ARATH RecName: Full=Receptor protein-tyrosine kinase CEPR2 {ECO:0000303|PubMed:25324386}; EC=2.7.10.1 {ECO:0000255|PROSITE-ProRule:PRU10027}; AltName: Full=Protein C-TERMINALLY ENCODED PEPTIDE RECEPTOR 2 {ECO:0000303|PubMed:25324386}; Flags: Precursor;	A0A446RVM1_TRITD RecName: Full=Protein kinase domain-containing protein {ECO:0000259|PROSITE:PS50011};	--	GO:0016021,integral component of membrane; GO:0005886,plasma membrane; GO:0005524,ATP binding; GO:0042277,peptide binding; GO:0017046,peptide hormone binding; GO:0001653,peptide receptor activity; GO:0004674,protein serine/threonine kinase activity; GO:0004714,transmembrane receptor protein tyrosine kinase activity; GO:1902025,nitrate import; GO:2000280,regulation of root development; GO:0048831,…	Leucine rich repeat	--	--	--
Cluster-120822.0	53.06	50.05	56.84	16.37	18.13	16.97	883	721	919	228	272	236	-1.68932	2.20803e-71	2.4626e-69	down	973	K10859 DNA oxidative demethylase [EC:1.14.11.33] | (RefSeq) alpha-ketoglutarate-dependent dioxygenase alkB homolog 3-like (A)	--	basic blue protein-like [Triticum urartu]	BABL_LILLO RecName: Full=Chemocyanin; AltName: Full=Basic blue protein; AltName: Full=Plantacyanin; Flags: Precursor;	M8AA77_TRIUA SubName: Full=Chemocyanin {ECO:0000313|EMBL:EMS61550.1, ECO:0000313|EnsemblPlants:TRIUR3_18837-P1};	--	GO:0009055,electron transfer activity; GO:0046872,metal ion binding; GO:0003674,molecular_function; GO:0003824,catalytic activity; GO:0016491,oxidoreductase activity; GO:0005488,binding; GO:0043167,ion binding; GO:0043169,cation binding	Plastocyanin-like domain	--	--	--
Cluster-80372.0	16.2	17.1	15.34	4.35	4.29	4.01	642	593	595	145	153	136	-1.99203	2.95223e-71	3.28326e-69	down	2339	K10717 cytokinin trans-hydroxylase | (RefSeq) cytokinin hydroxylase-like (A)	ko00908: Zeatin biosynthesis; ko01100: Metabolic pathways; ko01110: Biosynthesis of secondary metabolites	hypothetical protein ZWY2020_038981 [Hordeum vulgare]	C7352_ARATH RecName: Full=Cytokinin hydroxylase; EC=1.14.13.-; AltName: Full=Cytochrome P450 35A2;	A0A453KSQ5_AEGTS SubName: Full=Uncharacterized protein {ECO:0000313|EnsemblPlants:AET5Gv20502600.1};	Cytochrome P450 CYP4/CYP19/CYP26 subfamilies	GO:0016021,integral component of membrane; GO:0009506,plasmodesma; GO:0020037,heme binding; GO:0005506,iron ion binding; GO:0004497,monooxygenase activity; GO:0016705,oxidoreductase activity, acting on paired donors, with incorporation or reduction of molecular oxygen; GO:0033466,trans-zeatin biosynthetic process; GO:0003674,molecular_function; GO:0005488,binding; GO:0046906,tetrapyrrole binding;…	Cytochrome P450	--	--	--
Cluster-127747.0	7.4	6.63	7.46	36.17	35.65	30.88	147	114	144	603	639	515	2.20476	3.16618e-71	3.51621e-69	up	1102	--	--	--	--	--	--	--	--	--	--	--
Cluster-102619.18	8.6	5.81	8.44	55.68	52.37	47.47	109	64	104	593	601	504	2.70911	3.72488e-71	4.13082e-69	up	816	--	--	hypothetical protein L1887_46579 [Cichorium endivia]	--	A0A7S4T073_9DINO RecName: Full=Nitric oxide dioxygenase {ECO:0000256|ARBA:ARBA00012229}; EC=1.14.12.17 {ECO:0000256|ARBA:ARBA00012229};	Globins and related hemoproteins	GO:0071949,FAD binding; GO:0020037,heme binding; GO:0046872,metal ion binding; GO:0008941,nitric oxide dioxygenase activity; GO:0019825,oxygen binding; GO:0005344,oxygen carrier activity; GO:0062197,cellular response to chemical stress; GO:0051409,response to nitrosative stress; GO:0000166,nucleotide binding; GO:0003674,molecular_function; GO:0005488,binding; GO:0036094,small molecule binding; GO…	Oxidoreductase NAD-binding domain	--	--	--
Cluster-101896.0	50.47	33.51	47.52	106.95	87.63	86.01	904	703	796	1530	1603	1502	1.03627	4.41436e-71	4.88853e-69	up	1389	K14759 isochorismate synthase / 2-succinyl-5-enolpyruvyl-6-hydroxy-3-cyclohexene-1-carboxylate synthase / 2-succinyl-6-hydroxy-2,4-cyclohexadiene-1-carboxylate synthase / o-succinylbenzoate synthase [EC:5.4.4.2 2.2.1.9 4.2.99.20 4.2.1.113] | (RefSeq) isochorismate synthase (A)	ko00130: Ubiquinone and other terpenoid-quinone biosynthesis; ko01100: Metabolic pathways; ko01110: Biosynthesis of secondary metabolites; ko01240: Biosynthesis of cofactors	putative aminoacrylate hydrolase RutD [Triticum dicoccoides]	RMS3_PEA RecName: Full=Strigolactone esterase RMS3 {ECO:0000305}; EC=3.1.-.- {ECO:0000305}; AltName: Full=Protein DWARF 14 homolog {ECO:0000305}; Short=PsD14 {ECO:0000303|PubMed:27479744}; AltName: Full=Protein RAMOSUS 3 {ECO:0000303|PubMed:27479744};	A0A446PTZ5_TRITD RecName: Full=AB hydrolase-1 domain-containing protein {ECO:0000259|Pfam:PF00561};	Predicted hydrolase/acyltransferase (alpha/beta hydrolase superfamily)	GO:0005737,cytoplasm; GO:0005634,nucleus; GO:0016787,hydrolase activity; GO:0010223,secondary shoot formation; GO:1901601,strigolactone biosynthetic process; GO:0003674,molecular_function; GO:0003824,catalytic activity; GO:0001763,morphogenesis of a branching structure; GO:0007275,multicellular organism development; GO:0008150,biological_process; GO:0009653,anatomical structure morphogenesis; GO:…	alpha/beta hydrolase fold	--	--	--
Cluster-119721.3	76.67	74.57	71.73	13.13	14.51	14.6	496	419	450	70	84	78	-2.47044	5.92394e-71	6.55101e-69	down	566	--	--	hypothetical protein TRIUR3_14382 [Triticum urartu]	--	M7Z5C4_TRIUA SubName: Full=Uncharacterized protein {ECO:0000313|EMBL:EMS54756.1, ECO:0000313|EnsemblPlants:TRIUR3_14382-P1};	--	--	--	--	--	--
Cluster-46339.0	23.69	23.55	22.18	49.3	49.42	45.69	999	859	909	1750	1878	1623	1.01001	6.17159e-71	6.81526e-69	up	1993	K13227 UDP-glucosyltransferase BX8/BX9 [EC:2.4.1.202] | (RefSeq) DIMBOA UDP-glucosyltransferase BX8-like (A)	ko00402: Benzoxazinoid biosynthesis; ko00999: Biosynthesis of various plant secondary metabolites; ko01100: Metabolic pathways; ko01110: Biosynthesis of secondary metabolites	DIMBOA UDP-glucosyltransferase BX8 [Aegilops tauschii subsp. strangulata]	BX8_MAIZE RecName: Full=DIMBOA UDP-glucosyltransferase BX8; EC=2.4.1.202 {ECO:0000269|PubMed:11851909, ECO:0000269|PubMed:16666853}; AltName: Full=2,4-dihydroxy-7-methoxy-2H-1,4-benzoxazin-3(4H)-one 2-D-glucosyltransferase BX8; AltName: Full=Protein BENZOXAZINLESS 8;	A0A453MBD4_AEGTS SubName: Full=Uncharacterized protein {ECO:0000313|EnsemblPlants:AET5Gv21120900.1};	UDP-glucuronosyl and UDP-glucosyl transferase	GO:0047254,2,4-dihydroxy-7-methoxy-2H-1,4-benzoxazin-3(4H)-one 2-D-glucosyltransferase activity; GO:0080043,quercetin 3-O-glucosyltransferase activity; GO:0080044,quercetin 7-O-glucosyltransferase activity; GO:0003674,molecular_function; GO:0003824,catalytic activity; GO:0008194,UDP-glycosyltransferase activity; GO:0016740,transferase activity; GO:0016757,glycosyltransferase activity; GO:0016758,…	UDP-glucoronosyl and UDP-glucosyl transferase	--	--	--
Cluster-141150.8	8.66	8.72	9.34	22.97	24.29	22.98	397	346	417	888	1005	889	1.34812	6.23911e-71	6.88013e-69	up	2144	K03781 catalase [EC:1.11.1.6] | (RefSeq) catalase isozyme 2-like (A)	ko00380: Tryptophan metabolism; ko00630: Glyoxylate and dicarboxylate metabolism; ko01100: Metabolic pathways; ko01110: Biosynthesis of secondary metabolites; ko01200: Carbon metabolism; ko04016: MAPK signaling pathway - plant; ko04146: Peroxisome	catalase isozyme 2-like [Triticum aestivum]	CATA2_HORVU RecName: Full=Catalase isozyme 2; EC=1.11.1.6;	A0A3B6NJS8_WHEAT RecName: Full=Catalase {ECO:0000256|ARBA:ARBA00012314, ECO:0000256|RuleBase:RU000498}; EC=1.11.1.6 {ECO:0000256|ARBA:ARBA00012314, ECO:0000256|RuleBase:RU000498};	Catalase	GO:0009514,glyoxysome; GO:0004096,catalase activity; GO:0020037,heme binding; GO:0046872,metal ion binding; GO:0042744,hydrogen peroxide catabolic process; GO:0009628,response to abiotic stimulus; GO:0009725,response to hormone; GO:0000302,response to reactive oxygen species; GO:0003674,molecular_function; GO:0003824,catalytic activity; GO:0004601,peroxidase activity; GO:0016209,antioxidant activ…	Catalase	--	--	--
Cluster-86037.0	13.4	15.75	14.68	2.36	2.2	2.69	479	487	510	71	71	81	-2.64322	7.18873e-71	7.91618e-69	down	1736	K00128 aldehyde dehydrogenase (NAD+) [EC:1.2.1.3] | (RefSeq) Aldehyde dehydrogenase family 2 member B4, mitochondrial (A)	ko00010: Glycolysis / Gluconeogenesis; ko00053: Ascorbate and aldarate metabolism; ko00071: Fatty acid degradation; ko00280: Valine, leucine and isoleucine degradation; ko00310: Lysine degradation; ko00330: Arginine and proline metabolism; ko00340: Histidine metabolism; ko00380: Tryptophan metabolism; ko00410: beta-Alanine metabolism; ko00561: Glycerolipid metabolism; ko00620: Pyruvate metabolism…	hypothetical protein Lal_00042853 [Lupinus albus]	AL2C4_ARATH RecName: Full=Aldehyde dehydrogenase family 2 member C4; EC=1.2.1.3; AltName: Full=ALDH1a; AltName: Full=Protein REDUCED EPIDERMAL FLUORESCENCE 1;	A0A6A5LD21_LUPAL RecName: Full=Aldedh domain-containing protein {ECO:0000259|Pfam:PF00171};	Aldehyde dehydrogenase	GO:0005829,cytosol; GO:0004029,aldehyde dehydrogenase (NAD+) activity; GO:0050269,coniferyl-aldehyde dehydrogenase activity; GO:0043878,glyceraldehyde-3-phosphate dehydrogenase (NAD+) (non-phosphorylating) activity; GO:0009699,phenylpropanoid biosynthetic process; GO:0003674,molecular_function; GO:0003824,catalytic activity; GO:0004030,aldehyde dehydrogenase [NAD(P)+] activity; GO:0016491,oxidore…	Frigida-like protein	--	--	--
Cluster-113433.10	12.34	17.48	12.51	36.22	30.35	32.59	412	328	367	914	926	955	1.42519	1.07146e-70	1.17823e-68	up	2001	--	--	uncharacterized protein LOC119350623 [Triticum dicoccoides]	--	M8B259_TRIUA SubName: Full=Uncharacterized protein {ECO:0000313|EMBL:EMS67629.1, ECO:0000313|EnsemblPlants:TRIUR3_26756-P1};	--	--	--	--	--	--
Cluster-42880.0	27.2	28.68	30.57	4.76	4.24	5.46	470	429	513	69	66	79	-2.63455	1.27918e-70	1.40272e-68	down	998	K08907 light-harvesting complex I chlorophyll a/b binding protein 1 | (RefSeq) Light-harvest protein (A)	ko00196: Photosynthesis - antenna proteins; ko01100: Metabolic pathways	Chlorophyll A-B binding protein [Musa troglodytarum]	FCP_CHAMQ RecName: Full=Fucoxanthin-chlorophyll a-c binding protein, chloroplastic {ECO:0000305}; Short=FCP {ECO:0000305}; Flags: Precursor;	A0A835YWE6_9STRA SubName: Full=Light harvesting complex protein {ECO:0000313|EMBL:KAG5181312.1};	--	GO:0009535,chloroplast thylakoid membrane; GO:0016168,chlorophyll binding; GO:0009765,photosynthesis, light harvesting; GO:0003674,molecular_function; GO:0005488,binding; GO:0046906,tetrapyrrole binding; GO:0097159,organic cyclic compound binding; GO:1901363,heterocyclic compound binding; GO:0006091,generation of precursor metabolites and energy; GO:0008150,biological_process; GO:0008152,metaboli…	Chlorophyll A-B binding protein	--	--	--
Cluster-105320.0	9.85	8.08	10.05	30.37	30.69	29.58	327	232	324	848	918	826	1.64402	1.35951e-70	1.48872e-68	up	1634	K09841 xanthoxin dehydrogenase [EC:1.1.1.288] | (RefSeq) zerumbone synthase (A)	ko00906: Carotenoid biosynthesis; ko01100: Metabolic pathways; ko01110: Biosynthesis of secondary metabolites	sex determination protein tasselseed-2-like [Triticum aestivum]	TS2_MAIZE RecName: Full=Sex determination protein tasselseed-2;	A0A3B6JIZ9_WHEAT SubName: Full=Uncharacterized protein {ECO:0000313|EnsemblPlants:TraesCS4D02G190100.1.cds1};	Reductases with broad range of substrate specificities	GO:0016616,oxidoreductase activity, acting on the CH-OH group of donors, NAD or NADP as acceptor; GO:0003674,molecular_function; GO:0003824,catalytic activity; GO:0016491,oxidoreductase activity; GO:0016614,oxidoreductase activity, acting on CH-OH group of donors	Enoyl-(Acyl carrier protein) reductase	--	--	--
Cluster-121584.4	30.74	26.27	29.65	68.24	68.12	65.56	1104	859	1037	1951	2114	1803	1.05617	1.3851e-70	1.51463e-68	up	2209	K14454 aspartate aminotransferase, cytoplasmic [EC:2.6.1.1] | (RefSeq) aspartate aminotransferase, cytoplasmic (A)	ko00220: Arginine biosynthesis; ko00250: Alanine, aspartate and glutamate metabolism; ko00270: Cysteine and methionine metabolism; ko00330: Arginine and proline metabolism; ko00350: Tyrosine metabolism; ko00360: Phenylalanine metabolism; ko00400: Phenylalanine, tyrosine and tryptophan biosynthesis; ko00710: Carbon fixation in photosynthetic organisms; ko00950: Isoquinoline alkaloid biosynthesis; …	aspartate aminotransferase, cytoplasmic-like [Quercus suber]	AATC_DAUCA RecName: Full=Aspartate aminotransferase, cytoplasmic; EC=2.6.1.1; AltName: Full=Transaminase A;	A0A5N6KWA0_9ROSI RecName: Full=Aspartate aminotransferase {ECO:0000256|RuleBase:RU000480}; EC=2.6.1.1 {ECO:0000256|RuleBase:RU000480};	Aspartate aminotransferase/Glutamic oxaloacetic transaminase AAT2/GOT1	GO:0005737,cytoplasm; GO:0004069,L-aspartate:2-oxoglutarate aminotransferase activity; GO:0030170,pyridoxal phosphate binding; GO:0006103,2-oxoglutarate metabolic process; GO:0006531,aspartate metabolic process; GO:0006536,glutamate metabolic process; GO:1901566,organonitrogen compound biosynthetic process; GO:0003674,molecular_function; GO:0003824,catalytic activity; GO:0008483,transaminase acti…	Aminotransferase class I and II	--	--	--
Cluster-36824.5	0.45	0.51	0.27	5.76	5.24	6.22	35	34	20	378	368	409	3.78371	1.87136e-70	2.04351e-68	up	3423	K21989 calcium permeable stress-gated cation channel | (RefSeq) CSC1-like protein ERD4 (A)	--	hypothetical protein FH972_026599 [Carpinus fangiana]	CSC1L_BRAJU RecName: Full=CSC1-like protein ERD4; AltName: Full=Protein EARLY-RESPONSIVE TO DEHYDRATION STRESS 4;	A0A5N6L4X1_9ROSI SubName: Full=Uncharacterized protein {ECO:0000313|EMBL:KAB8760607.1};	Uncharacterized conserved protein	GO:0031969,chloroplast membrane; GO:0016021,integral component of membrane; GO:0005227,calcium activated cation channel activity; GO:0003674,molecular_function; GO:0005215,transporter activity; GO:0005216,ion channel activity; GO:0005261,cation channel activity; GO:0008324,cation transmembrane transporter activity; GO:0015075,ion transmembrane transporter activity; GO:0015267,channel activity; GO…	Calcium-dependent channel, 7TM region, putative phosphate	--	--	--
Cluster-135318.2	26.68	26.8	29.51	9.46	10.06	10.72	1057	916	1139	313	360	358	-1.50628	2.44148e-70	2.65867e-68	down	1895	--	--	hypothetical protein ZWY2020_022229 [Hordeum vulgare]	--	A0A8J5VV55_ZIZPA SubName: Full=Uncharacterized protein {ECO:0000313|EMBL:KAG8072256.1};	--	--	--	--	--	--
Cluster-43466.14	57.11	59.19	51.55	19.5	16.25	19.47	1251	1122	1097	359	321	358	-1.6545	3.53523e-70	3.83375e-68	down	1183	K07374 tubulin alpha | (RefSeq) hypothetical protein (A)	ko04145: Phagosome; ko04814: Motor proteins	hypothetical protein, partial [Scutellaria baicalensis]	TBA2_PELFA RecName: Full=Tubulin alpha-2 chain;	A0A6H5KGE3_9PHAE RecName: Full=Tubulin alpha chain {ECO:0000256|RuleBase:RU000352};	Alpha tubulin	GO:0005737,cytoplasm; GO:0005874,microtubule; GO:0005525,GTP binding; GO:0005200,structural constituent of cytoskeleton; GO:0007017,microtubule-based process; GO:0000166,nucleotide binding; GO:0003674,molecular_function; GO:0005488,binding; GO:0017076,purine nucleotide binding; GO:0019001,guanyl nucleotide binding; GO:0032553,ribonucleotide binding; GO:0032555,purine ribonucleotide binding; GO:00…	Tubulin/FtsZ family, GTPase domain	--	--	--
Cluster-97802.3	12.75	11.99	14.78	30.77	31.77	31.84	789	641	852	1532	1697	1614	1.17444	5.94224e-70	6.4351e-68	up	3495	--	--	hypothetical protein CFC21_006340 [Triticum aestivum]	--	A0A446JSP8_TRITD RecName: Full=DUF1338 domain-containing protein {ECO:0000259|SMART:SM01150};	--	--	Domain of unknown function (DUF1338)	--	--	--
Cluster-117346.5	1.43	1.65	1.47	17.05	18.64	13.57	46	46	46	464	543	369	3.3984	1.06766e-69	1.15303e-67	up	1602	--	--	hypothetical protein FH972_021796 [Carpinus fangiana]	--	A0A8J4WBB5_9STRA SubName: Full=Uncharacterized protein {ECO:0000313|EMBL:KAF4325403.1};	--	--	Cupin	--	--	--
Cluster-76852.8	31.06	29.12	35.71	83.75	84.35	82.86	580	470	647	1313	1420	1297	1.3368	1.31113e-69	1.41402e-67	up	1054	K01183 chitinase [EC:3.2.1.14] | (RefSeq) acidic endochitinase (A)	ko00520: Amino sugar and nucleotide sugar metabolism; ko01100: Metabolic pathways	alpha-amylase/trypsin inhibitor-like [Hordeum vulgare subsp. vulgare]	ZEAM_MAIZE RecName: Full=Zeamatin; Flags: Precursor;	A0A8I7B6N5_HORVV SubName: Full=Uncharacterized protein {ECO:0000313|EnsemblPlants:HORVU.MOREX.r3.4HG0333410.1.CDS1};	--	GO:0006952,defense response; GO:0050832,defense response to fungus; GO:0031640,killing of cells of another organism; GO:0051841,positive regulation by host of cytolysis of symbiont cells; GO:0006950,response to stress; GO:0008150,biological_process; GO:0050896,response to stimulus; GO:0009605,response to external stimulus; GO:0009607,response to biotic stimulus; GO:0009620,response to fungus; GO:…	Thaumatin family	--	--	--
Cluster-104008.3	75.3	78.05	81.37	17.8	19.71	15.99	563	505	589	111	133	99	-2.18754	1.90606e-69	2.05281e-67	down	606	K05953 nicotianamine synthase [EC:2.5.1.43] | (RefSeq) probable nicotianamine synthase 6 (A)	ko00270: Cysteine and methionine metabolism; ko00999: Biosynthesis of various plant secondary metabolites; ko01100: Metabolic pathways; ko01110: Biosynthesis of secondary metabolites	unnamed protein product [Triticum turgidum subsp. durum]	NAS7_HORVU RecName: Full=Probable nicotianamine synthase 7; EC=2.5.1.43; AltName: Full=HvNAS7; AltName: Full=S-adenosyl-L-methionine:S-adenosyl-L-methionine:S-adenosyl-methionine 3-amino-3-carboxypropyltransferase 7;	A0A446S5Q9_TRITD RecName: Full=Nicotianamine synthase {ECO:0000256|RuleBase:RU368095}; EC=2.5.1.43 {ECO:0000256|RuleBase:RU368095};	--	GO:0030410,nicotianamine synthase activity; GO:0030418,nicotianamine biosynthetic process; GO:0003674,molecular_function; GO:0003824,catalytic activity; GO:0016740,transferase activity; GO:0016765,transferase activity, transferring alkyl or aryl (other than methyl) groups; GO:0006082,organic acid metabolic process; GO:0006576,cellular biogenic amine metabolic process; GO:0006807,nitrogen compound…	--	--	--	--
Cluster-102665.6	20.5	17.31	17.17	55.53	56.33	54.1	387	283	315	881	960	857	1.54233	2.45781e-69	2.63979e-67	up	1063	K08360 transmembrane ascorbate-dependent reductase [EC:7.2.1.3] | (RefSeq) probable ascorbate-specific transmembrane electron transporter 1 (A)	--	predicted protein, partial [Hordeum vulgare subsp. vulgare]	ACET1_ORYSJ RecName: Full=Probable ascorbate-specific transmembrane electron transporter 1; EC=1.-.-.-; AltName: Full=Cytochrome b561-1;	F2DUR1_HORVV SubName: Full=Predicted protein {ECO:0000313|EMBL:BAJ98832.1}; Flags: Fragment;	Cytochrome b	GO:0016021,integral component of membrane; GO:0046872,metal ion binding; GO:0016491,oxidoreductase activity; GO:0003674,molecular_function; GO:0005488,binding; GO:0043167,ion binding; GO:0043169,cation binding; GO:0003824,catalytic activity; GO:0005575,cellular_component; GO:0016020,membrane; GO:0031224,intrinsic component of membrane; GO:0110165,cellular anatomical entity	Eukaryotic cytochrome b561	--	--	--
Cluster-115211.0	16.62	16.87	15.1	34.34	33.22	33.69	818	749	751	1471	1531	1448	1.02628	2.98917e-69	3.20172e-67	up	3066	K09419 heat shock transcription factor, other eukaryote | (RefSeq) heat stress transcription factor A-2a-like (A)	--	hypothetical protein ZWY2020_017452 [Hordeum vulgare]	HFA2A_ORYSJ RecName: Full=Heat stress transcription factor A-2a; AltName: Full=Heat shock protein 41; AltName: Full=Heat stress transcription factor 11; Short=OsHsf-11; AltName: Full=Heat stress transcription factor 4; Short=rHsf4;	A0A446ULX7_TRITD RecName: Full=HSF_DOMAIN domain-containing protein {ECO:0000259|PROSITE:PS00434};	Heat shock transcription factor	GO:0005737,cytoplasm; GO:0005634,nucleus; GO:0003700,DNA-binding transcription factor activity; GO:0000978,RNA polymerase II cis-regulatory region sequence-specific DNA binding; GO:0034605,cellular response to heat; GO:0006357,regulation of transcription by RNA polymerase II; GO:0003674,molecular_function; GO:0140110,transcription regulator activity; GO:0000976,transcription cis-regulatory region…	HSF-type DNA-binding	HSF	TF	HSF
Cluster-66148.0	9.72	10.81	10.52	0.35	0.22	0.2	397	382	418	12	8	7	-5.38586	3.55806e-69	3.80067e-67	down	1941	K24193 MFS transporter, SP family, sugar:H+ symporter | (RefSeq) sugar transport protein 13-like (A)	--	uncharacterized protein LOC112013754 [Quercus suber]	STP10_ARATH RecName: Full=Sugar transport protein 10 {ECO:0000303|PubMed:16923188}; Short=AtSTP10 {ECO:0000303|PubMed:26893494}; AltName: Full=D-glucose-H(+) symport protein STP10 {ECO:0000305}; AltName: Full=D-glucose-proton symporter STP10 {ECO:0000305}; AltName: Full=Hexose transporter 10 {ECO:0000305};	A0A5N6KTT0_9ROSI RecName: Full=MFS domain-containing protein {ECO:0000259|PROSITE:PS50850};	Predicted transporter (major facilitator superfamily)	GO:0016021,integral component of membrane; GO:0005886,plasma membrane; GO:0055055,D-glucose:proton symporter activity; GO:0005354,galactose transmembrane transporter activity; GO:0009679,hexose:proton symporter activity; GO:0015578,mannose transmembrane transporter activity; GO:0071333,cellular response to glucose stimulus; GO:0008645,hexose transmembrane transport; GO:0003674,molecular_function;…	Sugar (and other) transporter	--	--	--
Cluster-134048.2	44.48	44.19	45.52	15.51	16.99	15.94	817	702	812	239	281	245	-1.52117	3.91586e-69	4.17719e-67	down	1042	K01673 carbonic anhydrase [EC:4.2.1.1] | (RefSeq) carbonic anhydrase, chloroplastic-like (A)	ko00910: Nitrogen metabolism; ko01100: Metabolic pathways	carbonic anhydrase, chloroplastic-like [Triticum dicoccoides]	CAHC_HORVU RecName: Full=Carbonic anhydrase, chloroplastic; EC=4.2.1.1; AltName: Full=Carbonate dehydratase; Flags: Precursor;	A0A446YTD0_TRITD RecName: Full=Carbonic anhydrase {ECO:0000256|ARBA:ARBA00012925, ECO:0000256|RuleBase:RU003956}; EC=4.2.1.1 {ECO:0000256|ARBA:ARBA00012925, ECO:0000256|RuleBase:RU003956}; AltName: Full=Carbonate dehydratase {ECO:0000256|RuleBase:RU003956};	Predicted carbonic anhydrase involved in protection against oxidative damage	GO:0009570,chloroplast stroma; GO:0004089,carbonate dehydratase activity; GO:0008270,zinc ion binding; GO:0015976,carbon utilization; GO:0003674,molecular_function; GO:0003824,catalytic activity; GO:0016829,lyase activity; GO:0016835,carbon-oxygen lyase activity; GO:0016836,hydro-lyase activity; GO:0005488,binding; GO:0043167,ion binding; GO:0043169,cation binding; GO:0046872,metal ion binding; G…	Carbonic anhydrase	--	--	--
Cluster-61323.6	20.4	21.93	21.56	45.03	19.89	14.73	183	140	192	824	1013	702	2.38758	5.64527e-69	6.00567e-67	up	2576	--	--	hypothetical protein FH972_026029 [Carpinus fangiana]	--	A0A5N6L2Z3_9ROSI SubName: Full=Uncharacterized protein {ECO:0000313|EMBL:KAB8621920.1};	--	--	--	--	--	--
Cluster-127561.4	7.22	8.07	7.41	18.03	17.94	17.79	502	486	501	1059	1126	1046	1.20223	6.68184e-69	7.09877e-67	up	3094	K19044 E3 ubiquitin-protein ligase XBAT32/33 [EC:2.3.2.27] | (RefSeq) probable E3 ubiquitin-protein ligase XBOS33 (A)	--	hypothetical protein CFC21_024795 [Triticum aestivum]	P2A11_ARATH RecName: Full=F-box protein PP2-A11; AltName: Full=Protein PHLOEM PROTEIN 2-LIKE A11; Short=AtPP2-A11; AltName: Full=SKP1-interacting partner 10;	R7W3R3_AEGTA RecName: Full=F-box domain-containing protein {ECO:0000259|PROSITE:PS50181};	--	GO:0005634,nucleus; GO:0030246,carbohydrate binding; GO:0071456,cellular response to hypoxia; GO:0016567,protein ubiquitination; GO:0003674,molecular_function; GO:0005488,binding; GO:0001666,response to hypoxia; GO:0006950,response to stress; GO:0008150,biological_process; GO:0009628,response to abiotic stimulus; GO:0009987,cellular process; GO:0033554,cellular response to stress; GO:0036293,resp…	Phloem protein 2	--	--	--
Cluster-120202.3	35.67	39.19	37.61	0.16	0.42	0.06	763	717	783	3	8	1	-7.47525	1.02478e-68	1.08432e-66	down	1202	K15919 glyoxylate/hydroxypyruvate reductase [EC:1.1.1.79 1.1.1.81] | (RefSeq) glyoxylate/hydroxypyruvate reductase HPR3-like (A)	ko00260: Glycine, serine and threonine metabolism; ko00630: Glyoxylate and dicarboxylate metabolism; ko01100: Metabolic pathways; ko01110: Biosynthesis of secondary metabolites; ko01200: Carbon metabolism	hypothetical protein BT93_L4536 [Corymbia citriodora subsp. variegata]	HPR3_ARATH RecName: Full=Glyoxylate/hydroxypyruvate reductase HPR3; EC=1.1.1.79 {ECO:0000305|PubMed:21205613}; EC=1.1.1.81 {ECO:0000305|PubMed:21205613}; AltName: Full=NAD(P)H-dependent hydroxypyruvate reductase 3; Short=AtHPR3; Short=HPR 3;	A0A6A5L2D2_LUPAL SubName: Full=Uncharacterized protein {ECO:0000313|EMBL:KAF1853725.1};	Glyoxylate/hydroxypyruvate reductase (D-isomer-specific 2-hydroxy acid dehydrogenase superfamily)	GO:0030267,glyoxylate reductase (NADP+) activity; GO:0016618,hydroxypyruvate reductase activity; GO:0051287,NAD binding; GO:0009854,oxidative photosynthetic carbon pathway; GO:0009853,photorespiration; GO:0003674,molecular_function; GO:0003824,catalytic activity; GO:0016491,oxidoreductase activity; GO:0016614,oxidoreductase activity, acting on CH-OH group of donors; GO:0016616,oxidoreductase acti…	D-isomer specific 2-hydroxyacid dehydrogenase, NAD binding domain	--	--	--
Cluster-104254.4	27.21	25.05	23.45	70.97	81.63	71.5	527	420	441	1156	1428	1163	1.51774	1.15141e-68	1.21503e-66	up	1083	--	--	hypothetical protein FVEG_02849 [Fusarium verticillioides 7600]	--	B4FUQ3_MAIZE SubName: Full=Uncharacterized protein {ECO:0000313|EMBL:ACF85846.1};	--	GO:0005199,structural constituent of cell wall; GO:0003674,molecular_function; GO:0005198,structural molecule activity	--	--	--	--
Cluster-91263.6	10.54	14.85	11.69	43.39	52.4	47.52	197	192	206	641	790	645	1.88509	1.35149e-68	1.42425e-66	up	1104	--	--	probable glucan endo-1,3-beta-glucosidase eglC [Quercus suber]	--	A0A5N6L3M7_9ROSI RecName: Full=Glucan endo-1,3-beta-D-glucosidase {ECO:0000256|ARBA:ARBA00012780}; EC=3.2.1.39 {ECO:0000256|ARBA:ARBA00012780}; AltName: Full=(1->3)-beta-glucan endohydrolase {ECO:0000256|ARBA:ARBA00033335}; AltName: Full=Beta-1,3-endoglucanase {ECO:0000256|ARBA:ARBA00033417};	--	GO:0042973,glucan endo-1,3-beta-D-glucosidase activity; GO:0005975,carbohydrate metabolic process; GO:0003674,molecular_function; GO:0003824,catalytic activity; GO:0004553,hydrolase activity, hydrolyzing O-glycosyl compounds; GO:0008422,beta-glucosidase activity; GO:0015926,glucosidase activity; GO:0016787,hydrolase activity; GO:0016798,hydrolase activity, acting on glycosyl bonds; GO:0008150,bio…	Glycosyl hydrolases family 17	--	--	--
Cluster-7833.7	3.62	4.31	3.37	13.14	12.74	13.36	246	253	223	754	781	767	1.75592	1.94643e-68	2.04297e-66	up	3029	K16224 senescence-induced receptor-like serine/threonine-protein kinase | (RefSeq) senescence-induced receptor-like serine/threonine-protein kinase (A)	ko04016: MAPK signaling pathway - plant; ko04626: Plant-pathogen interaction	hypothetical protein CFC21_009970 [Triticum aestivum]	Y1518_ARATH RecName: Full=Probable LRR receptor-like serine/threonine-protein kinase At1g51860; EC=2.7.11.1; Flags: Precursor;	A0A3B5ZPA7_WHEAT RecName: Full=Protein kinase domain-containing protein {ECO:0000259|PROSITE:PS50011};	--	GO:0016021,integral component of membrane; GO:0005524,ATP binding; GO:0106310,protein serine kinase activity; GO:0004674,protein serine/threonine kinase activity; GO:0006468,protein phosphorylation; GO:0000166,nucleotide binding; GO:0003674,molecular_function; GO:0005488,binding; GO:0017076,purine nucleotide binding; GO:0030554,adenyl nucleotide binding; GO:0032553,ribonucleotide binding; GO:0032…	Malectin-like domain	--	--	--
Cluster-109210.4	8.37	8.4	7.89	43.83	39.8	41.41	103	88	94	445	443	420	2.28564	2.69214e-68	2.82189e-66	up	819	--	--	uncharacterized protein LOC123121945 [Triticum aestivum]	--	A0A453L4G2_AEGTS SubName: Full=Uncharacterized protein {ECO:0000313|EnsemblPlants:AET5Gv20627600.1};	--	--	Protein of unknown function, DUF538	--	--	--
Cluster-59318.15	16.31	16.31	17.57	72.66	75.55	58.31	292	253	306	1093	1221	876	1.9908	7.2174e-68	7.51501e-66	up	1024	K01915 glutamine synthetase [EC:6.3.1.2] | (RefSeq) glutamine synthetase nodule isozyme (A)	ko00220: Arginine biosynthesis; ko00250: Alanine, aspartate and glutamate metabolism; ko00630: Glyoxylate and dicarboxylate metabolism; ko00910: Nitrogen metabolism; ko01100: Metabolic pathways; ko01230: Biosynthesis of amino acids	glutamine synthetase-like [Quercus suber]	GLN11_ORYSJ RecName: Full=Glutamine synthetase cytosolic isozyme 1-1 {ECO:0000305}; EC=6.3.1.2 {ECO:0000269|PubMed:15574840}; AltName: Full=Glutamate--ammonia ligase GLN1;1 {ECO:0000305}; Short=OsGLN1;1 {ECO:0000303|PubMed:15574840}; AltName: Full=Glutamine synthetase shoot isozyme {ECO:0000305}; AltName: Full=OsGS1;1 {ECO:0000303|Ref.2};	A0A7S3NPG2_9STRA RecName: Full=Glutamine synthetase {ECO:0000256|ARBA:ARBA00012937, ECO:0000256|RuleBase:RU004356}; EC=6.3.1.2 {ECO:0000256|ARBA:ARBA00012937, ECO:0000256|RuleBase:RU004356};	Glutamine synthetase	GO:0005737,cytoplasm; GO:0005524,ATP binding; GO:0004356,glutamate-ammonia ligase activity; GO:0006542,glutamine biosynthetic process; GO:0000166,nucleotide binding; GO:0003674,molecular_function; GO:0005488,binding; GO:0017076,purine nucleotide binding; GO:0030554,adenyl nucleotide binding; GO:0032553,ribonucleotide binding; GO:0032555,purine ribonucleotide binding; GO:0032559,adenyl ribonucleot…	Glutamine synthetase, catalytic domain	--	--	--
Cluster-135793.0	13.62	12.03	13.41	33.34	38.61	38.48	463	366	444	959	1171	1087	1.42484	7.49477e-68	7.79347e-66	up	1791	K13065 shikimate O-hydroxycinnamoyltransferase [EC:2.3.1.133] | (RefSeq) putrescine hydroxycinnamoyltransferase 1-like (A)	ko00940: Phenylpropanoid biosynthesis; ko00941: Flavonoid biosynthesis; ko00945: Stilbenoid, diarylheptanoid and gingerol biosynthesis; ko01100: Metabolic pathways; ko01110: Biosynthesis of secondary metabolites	putrescine hydroxycinnamoyltransferase 1 [Aegilops tauschii subsp. strangulata]	PHT1_ORYSJ RecName: Full=Putrescine hydroxycinnamoyltransferase 1 {ECO:0000305}; Short=OsPHT1 {ECO:0000303|PubMed:27354554}; EC=2.3.1.- {ECO:0000305}; AltName: Full=BAHD-like hydroxycinnamoyl transferase HCT3 {ECO:0000305}; AltName: Full=Hydroxycinnamoyltransferase 3 {ECO:0000305}; Short=OsHCT3 {ECO:0000303|PubMed:22285622};	A0A453PAK1_AEGTS SubName: Full=Uncharacterized protein {ECO:0000313|EnsemblPlants:AET6Gv20670800.1};	--	GO:0016747,acyltransferase activity, transferring groups other than amino-acyl groups; GO:0050734,hydroxycinnamoyltransferase activity; GO:0003674,molecular_function; GO:0003824,catalytic activity; GO:0016740,transferase activity; GO:0016746,acyltransferase activity	Transferase family	--	--	--
Cluster-76668.2	3.47	4.39	4.74	23.73	23.1	22.83	80	87	106	460	480	442	2.42459	1.49554e-67	1.5449e-65	up	1230	K06910 phosphatidylethanolamine-binding protein | (RefSeq) protein MOTHER of FT and TFL1 homolog 1 (A)	--	protein MOTHER of FT and TFL1 homolog 1 [Aegilops tauschii subsp. strangulata]	MFT1_ORYSJ RecName: Full=Protein MOTHER of FT and TFL1 homolog 1 {ECO:0000305}; Short=OsMFT1 {ECO:0000303|PubMed:16170456};	A0A1D6DKF8_WHEAT SubName: Full=Uncharacterized protein {ECO:0000313|EnsemblPlants:TraesCS7A02G229400.1};	Phosphatidylethanolamine binding protein	--	Phosphatidylethanolamine-binding protein	--	--	--
Cluster-84469.0	82.39	81.91	81.42	25.12	31.4	33.16	1828	1572	1757	468	628	617	-1.5047	1.75644e-67	1.80964e-65	down	1220	K22683 aspartyl protease family protein [EC:3.4.23.-] | (RefSeq) protein ASPARTIC PROTEASE IN GUARD CELL 1-like (A)	--	hypothetical protein CFC21_095497 [Triticum aestivum]	ASPA_ARATH RecName: Full=Aspartyl protease family protein At5g10770; EC=3.4.23.- {ECO:0000305}; Flags: Precursor;	A0A3B6RBJ4_WHEAT RecName: Full=Peptidase A1 domain-containing protein {ECO:0000259|PROSITE:PS51767};	Aspartyl protease	GO:0031225,anchored component of membrane; GO:0005886,plasma membrane; GO:0004190,aspartic-type endopeptidase activity; GO:0006508,proteolysis; GO:0003674,molecular_function; GO:0003824,catalytic activity; GO:0004175,endopeptidase activity; GO:0008233,peptidase activity; GO:0016787,hydrolase activity; GO:0070001,aspartic-type peptidase activity; GO:0140096,catalytic activity, acting on a protein;…	Xylanase inhibitor N-terminal	--	--	--
Cluster-76266.0	4.63	3.45	3.49	24.26	24.86	23.64	94	61	69	415	457	404	2.59921	2.34066e-67	2.40208e-65	up	1125	--	--	--	--	--	--	--	Alternaria alternata allergen 1	--	--	--
Cluster-44087.0	18.91	16.33	18.55	0.26	0.64	0.74	427	319	407	5	13	14	-5.08066	2.54941e-67	2.61289e-65	down	1210	--	--	--	--	A0A7S4GHQ3_9EUGL SubName: Full=Hypothetical protein {ECO:0000313|EMBL:CAE0837411.1}; Flags: Fragment;	--	--	GDSL-like Lipase/Acylhydrolase family	--	--	--
Cluster-40176.38	13.6	12.77	12.55	1.11	0.35	0.62	538	494	545	41	13	23	-4.26441	3.18159e-67	3.25231e-65	down	2096	K00128 aldehyde dehydrogenase (NAD+) [EC:1.2.1.3] | (RefSeq) aldehyde dehydrogenase family 2 member B4, mitochondrial-like (A)	ko00010: Glycolysis / Gluconeogenesis; ko00053: Ascorbate and aldarate metabolism; ko00071: Fatty acid degradation; ko00280: Valine, leucine and isoleucine degradation; ko00310: Lysine degradation; ko00330: Arginine and proline metabolism; ko00340: Histidine metabolism; ko00380: Tryptophan metabolism; ko00410: beta-Alanine metabolism; ko00561: Glycerolipid metabolism; ko00620: Pyruvate metabolism…	aldehyde dehydrogenase [Quercus suber]	AL2B7_ARATH RecName: Full=Aldehyde dehydrogenase family 2 member B7, mitochondrial; Short=ALDH2b; EC=1.2.1.3; Flags: Precursor;	A0A2H4Z9T8_9BRYO SubName: Full=Aldehyde dehydrogenase 2F1 {ECO:0000313|EMBL:AUF72237.1};	Aldehyde dehydrogenase	GO:0005759,mitochondrial matrix; GO:0005634,nucleus; GO:0004029,aldehyde dehydrogenase (NAD+) activity; GO:0043878,glyceraldehyde-3-phosphate dehydrogenase (NAD+) (non-phosphorylating) activity; GO:0003674,molecular_function; GO:0003824,catalytic activity; GO:0004030,aldehyde dehydrogenase [NAD(P)+] activity; GO:0016491,oxidoreductase activity; GO:0016620,oxidoreductase activity, acting on the al…	Aldehyde dehydrogenase family	--	--	--
Cluster-132738.2	80.98	91.67	104.16	17.82	16.28	16.9	551	541	687	101	100	95	-2.50163	3.96512e-67	4.04798e-65	down	579	--	--	hypothetical protein CFC21_081262 [Triticum aestivum]	--	A0A3B6N1Z9_WHEAT SubName: Full=Uncharacterized protein {ECO:0000313|EnsemblPlants:TraesCS5D02G563300.1};	--	--	--	--	--	--
Cluster-120167.25	26.74	31.48	28.01	64.95	60.94	62.37	938	965	969	1930	1984	1907	1.10219	1.16515e-66	1.17724e-64	up	2199	--	--	ABA-inducible protein PHV A1-like isoform X2 [Triticum aestivum]	LEA1_HORVU RecName: Full=ABA-inducible protein PHV A1;	A0A452ZQB3_AEGTS SubName: Full=Uncharacterized protein {ECO:0000313|EnsemblPlants:AET1Gv20878900.14};	--	--	Late embryogenesis abundant protein	--	--	--
Cluster-79877.19	22.41	23.44	22.99	70.54	71.32	68.38	248	225	247	655	714	632	1.5601	1.49114e-66	1.50081e-64	up	751	K03283 heat shock 70kDa protein 1/6/8 | (RefSeq) heat shock cognate 70 kDa protein-like (A)	ko03040: Spliceosome; ko04141: Protein processing in endoplasmic reticulum; ko04144: Endocytosis	heat shock cognate 70 kDa protein-like [Triticum dicoccoides]	HSP7C_PETHY RecName: Full=Heat shock cognate 70 kDa protein;	A0A453IDA3_AEGTS SubName: Full=Uncharacterized protein {ECO:0000313|EnsemblPlants:AET4Gv20525900.3};	Molecular chaperones HSP70/HSC70, HSP70 superfamily	GO:0005524,ATP binding; GO:0140662,ATP-dependent protein folding chaperone; GO:0000166,nucleotide binding; GO:0003674,molecular_function; GO:0005488,binding; GO:0017076,purine nucleotide binding; GO:0030554,adenyl nucleotide binding; GO:0032553,ribonucleotide binding; GO:0032555,purine ribonucleotide binding; GO:0032559,adenyl ribonucleotide binding; GO:0035639,purine ribonucleoside triphosphate …	Hsp70 protein	--	--	--
Cluster-86016.0	0.96	0.95	0.9	17.23	14.96	18.12	21	18	19	316	295	332	4.11249	2.04828e-66	2.05628e-64	up	1196	--	--	hypothetical protein [Adiantum nelumboides]	--	A0A7S2GPJ5_9DINO SubName: Full=Hypothetical protein {ECO:0000313|EMBL:CAD9465853.1}; Flags: Fragment;	--	GO:0003824,catalytic activity; GO:0003674,molecular_function	HpcH/HpaI aldolase/citrate lyase family	--	--	--
Cluster-11395.5	1.71	1.88	2.07	13.14	13.47	11.32	66	63	78	432	475	373	2.7129	2.24691e-66	2.2528e-64	up	1872	--	--	--	--	--	--	--	Protoglobin	--	--	--
Cluster-60822.2	4.29	2.47	4.18	24.9	26.52	25.78	126	63	120	618	706	640	2.76488	2.562e-66	2.56544e-64	up	1488	K07513 acetyl-CoA acyltransferase 1 [EC:2.3.1.16] | (RefSeq) LOW QUALITY PROTEIN: uncharacterized protein LOC116245061 (A)	ko00071: Fatty acid degradation; ko00280: Valine, leucine and isoleucine degradation; ko00592: alpha-Linolenic acid metabolism; ko01040: Biosynthesis of unsaturated fatty acids; ko01100: Metabolic pathways; ko01110: Biosynthesis of secondary metabolites; ko01212: Fatty acid metabolism; ko04146: Peroxisome	3-ketoacyl-CoA thiolase, peroxisomal-like [Quercus suber]	THIK2_ARATH RecName: Full=3-ketoacyl-CoA thiolase 2, peroxisomal; EC=2.3.1.16; AltName: Full=Acetyl-CoA acyltransferase 2; AltName: Full=Beta-ketothiolase 2; AltName: Full=Peroxisomal 3-oxoacyl-CoA thiolase 2; AltName: Full=Peroxisome defective protein 1; Flags: Precursor;	A0A5N6KPE9_9ROSI SubName: Full=Uncharacterized protein {ECO:0000313|EMBL:KAB8336950.1};	3-oxoacyl CoA thiolase	GO:0005783,endoplasmic reticulum; GO:0009514,glyoxysome; GO:0005739,mitochondrion; GO:0005730,nucleolus; GO:0005777,peroxisome; GO:0000325,plant-type vacuole; GO:0003988,acetyl-CoA C-acyltransferase activity; GO:0006635,fatty acid beta-oxidation; GO:0006633,fatty acid biosynthetic process; GO:0010111,glyoxysome organization; GO:0009695,jasmonic acid biosynthetic process; GO:0031408,oxylipin biosy…	Thiolase, N-terminal domain	--	--	--
Cluster-109265.1	7.22	7.52	8.45	57	69.38	68.99	52	47	59	340	451	411	3.01191	3.12602e-66	3.12223e-64	up	595	--	--	--	--	--	--	--	--	--	--	--
Cluster-77535.12	25.56	23.98	25.57	6.79	8.88	8.44	1104	896	1073	246	345	307	-1.68826	1.23007e-65	1.22235e-63	down	2035	K05909 laccase [EC:1.10.3.2] | (RefSeq) putative laccase-5 (A)	--	putative laccase-5 [Triticum dicoccoides]	LAC5_ORYSJ RecName: Full=Putative laccase-5; EC=1.10.3.2; AltName: Full=Benzenediol:oxygen oxidoreductase 5; AltName: Full=Diphenol oxidase 5; AltName: Full=Urishiol oxidase 5; Flags: Precursor;	A0A077S4X1_WHEAT RecName: Full=Laccase {ECO:0000256|ARBA:ARBA00012297, ECO:0000256|RuleBase:RU361119}; EC=1.10.3.2 {ECO:0000256|ARBA:ARBA00012297, ECO:0000256|RuleBase:RU361119}; AltName: Full=Benzenediol:oxygen oxidoreductase {ECO:0000256|RuleBase:RU361119}; AltName: Full=Diphenol oxidase {ECO:0000256|RuleBase:RU361119}; AltName: Full=Urishiol oxidase {ECO:0000256|RuleBase:RU361119};	Multicopper oxidases	GO:0048046,apoplast; GO:0005507,copper ion binding; GO:0052716,hydroquinone:oxygen oxidoreductase activity; GO:0016491,oxidoreductase activity; GO:0046274,lignin catabolic process; GO:0003674,molecular_function; GO:0005488,binding; GO:0043167,ion binding; GO:0043169,cation binding; GO:0046872,metal ion binding; GO:0046914,transition metal ion binding; GO:0003824,catalytic activity; GO:0016679,oxi…	Multicopper oxidase	--	--	--
Cluster-16304.1	0	0.41	0.17	216.79	237.75	208.63	0	4	2	2031	2399	1948	10.1378	1.56447e-65	1.55072e-63	up	791	--	--	hypothetical protein [Adiantum nelumboides]	--	A0A5J4XWI8_9CHLO RecName: Full=NAD(P)H dehydrogenase (quinone) {ECO:0000256|ARBA:ARBA00012648}; EC=1.6.5.2 {ECO:0000256|ARBA:ARBA00012648}; Flags: Fragment;	Predicted flavoprotein	GO:0003955,NAD(P)H dehydrogenase (quinone) activity; GO:0003674,molecular_function; GO:0003824,catalytic activity; GO:0016491,oxidoreductase activity; GO:0016651,oxidoreductase activity, acting on NAD(P)H; GO:0016655,oxidoreductase activity, acting on NAD(P)H, quinone or similar compound as acceptor	NADPH-dependent FMN reductase	--	--	--
Cluster-17458.3	3.21	3.08	4.55	17.19	15.59	15.04	112	94	99	460	468	415	2.22536	1.62593e-65	1.60961e-63	up	1723	--	--	--	--	A0A7S3JPT0_9STRA SubName: Full=Hypothetical protein {ECO:0000313|EMBL:CAE0359531.1};	--	GO:0000981,DNA-binding transcription factor activity, RNA polymerase II-specific; GO:0008270,zinc ion binding; GO:0003674,molecular_function; GO:0003700,DNA-binding transcription factor activity; GO:0140110,transcription regulator activity; GO:0005488,binding; GO:0043167,ion binding; GO:0043169,cation binding; GO:0046872,metal ion binding; GO:0046914,transition metal ion binding	Fungal Zn(2)-Cys(6) binuclear cluster domain	zn-clus	TF	zn-clus
Cluster-114086.2	4.48	5.86	4.3	33.71	39.46	30.87	81	92	76	515	648	471	2.79078	1.71804e-65	1.69865e-63	up	1036	--	--	protein TsetseEP-like [Triticum dicoccoides]	--	A0A3B6KDU3_WHEAT SubName: Full=Uncharacterized protein {ECO:0000313|EnsemblPlants:TraesCS5A02G083700.1.cds1};	--	--	Procyclic acidic repetitive protein (PARP)	--	--	--
Cluster-130658.1	23.19	23.84	21.48	0.28	0.37	0.34	490	436	441	5	7	6	-6.16218	1.72209e-65	1.70051e-63	down	1152	K00469 inositol oxygenase [EC:1.13.99.1] | (RefSeq) inositol oxygenase 4-like (A)	ko00053: Ascorbate and aldarate metabolism; ko00562: Inositol phosphate metabolism; ko01100: Metabolic pathways; ko01250: Biosynthesis of nucleotide sugars	hypothetical protein FH972_023093 [Carpinus fangiana]	MIOX1_ARATH RecName: Full=Inositol oxygenase 1 {ECO:0000303|PubMed:15660207}; EC=1.13.99.1 {ECO:0000250|UniProtKB:Q8H1S0, ECO:0000305|PubMed:15660207}; AltName: Full=Myo-inositol oxygenase 1 {ECO:0000303|PubMed:15660207}; Short=AtMIOX1 {ECO:0000303|PubMed:15660207}; Short=MI oxygenase 1;	A0A5N6KUJ0_9ROSI RecName: Full=Inositol oxygenase {ECO:0000256|ARBA:ARBA00011919, ECO:0000256|RuleBase:RU367039}; EC=1.13.99.1 {ECO:0000256|ARBA:ARBA00011919, ECO:0000256|RuleBase:RU367039}; AltName: Full=Myo-inositol oxygenase {ECO:0000256|RuleBase:RU367039};	Aldehyde reductase	GO:0005737,cytoplasm; GO:0050113,inositol oxygenase activity; GO:0005506,iron ion binding; GO:0019310,inositol catabolic process; GO:0019853,L-ascorbic acid biosynthetic process; GO:0003674,molecular_function; GO:0003824,catalytic activity; GO:0004497,monooxygenase activity; GO:0016491,oxidoreductase activity; GO:0016701,oxidoreductase activity, acting on single donors with incorporation of molec…	Myo-inositol oxygenase	--	--	--
Cluster-101809.2	9.7	9.66	12.47	87.64	79.16	105.69	57	49	71	430	422	514	3.03943	2.22376e-65	2.18763e-63	up	543	K03809 NAD(P)H dehydrogenase (quinone) [EC:1.6.5.2] | (RefSeq) NAD(P)H dehydrogenase (quinone) FQR1-like (A)	ko00130: Ubiquinone and other terpenoid-quinone biosynthesis; ko01100: Metabolic pathways; ko01110: Biosynthesis of secondary metabolites; ko01240: Biosynthesis of cofactors	quinone-oxidoreductase QR2-like [Triticum dicoccoides]	QR2_TRIVS RecName: Full=Quinone-oxidoreductase QR2 {ECO:0000303|PubMed:11260494}; Short=TvQR2 {ECO:0000303|PubMed:11260494}; EC=1.6.5.2 {ECO:0000269|Ref.2};	A0A453ID97_AEGTS RecName: Full=NAD(P)H dehydrogenase (quinone) {ECO:0000256|ARBA:ARBA00012648}; EC=1.6.5.2 {ECO:0000256|ARBA:ARBA00012648};	1,4-benzoquinone reductase-like; Trp repressor binding protein-like/protoplast-secreted protein	GO:0010181,FMN binding; GO:0050136,NADH dehydrogenase (quinone) activity; GO:0008753,NADPH dehydrogenase (quinone) activity; GO:0000166,nucleotide binding; GO:0003674,molecular_function; GO:0005488,binding; GO:0032553,ribonucleotide binding; GO:0036094,small molecule binding; GO:0043167,ion binding; GO:0043168,anion binding; GO:0097159,organic cyclic compound binding; GO:0097367,carbohydrate deri…	NADPH-dependent FMN reductase	--	--	--
Cluster-111285.3	98.93	97.77	87.69	40.39	37.61	44.54	2107	1810	1819	720	723	798	-1.26858	3.46089e-65	3.39189e-63	down	1168	K22588 acetylserotonin O-methyltransferase, plant [EC:2.1.1.4] | (RefSeq) trans-resveratrol di-O-methyltransferase-like isoform X1 (A)	ko00380: Tryptophan metabolism; ko01100: Metabolic pathways; ko01110: Biosynthesis of secondary metabolites	predicted protein [Hordeum vulgare subsp. vulgare]	Y1103_ORYSJ RecName: Full=Flavonoid O-methyltransferase-like protein Os11g0303600 {ECO:0000305}; EC=2.1.1.- {ECO:0000305};	F2DQT4_HORVV SubName: Full=Predicted protein {ECO:0000313|EMBL:BAJ97455.1};	Hydroxyindole-O-methyltransferase and related SAM-dependent methyltransferases	GO:0008171,O-methyltransferase activity; GO:0046983,protein dimerization activity; GO:0008757,S-adenosylmethionine-dependent methyltransferase activity; GO:0019438,aromatic compound biosynthetic process; GO:0032259,methylation; GO:0003674,molecular_function; GO:0003824,catalytic activity; GO:0008168,methyltransferase activity; GO:0016740,transferase activity; GO:0016741,transferase activity, tran…	O-methyltransferase domain	--	--	--
Cluster-98191.0	103.89	111.23	103.96	53.41	51.56	52.85	1374	1274	1335	592	615	584	-1.06813	3.71706e-65	3.63841e-63	down	836	--	--	protein RESPONSE TO LOW SULFUR 1-like [Triticum aestivum]	LSU3_ARATH RecName: Full=Protein RESPONSE TO LOW SULFUR 3 {ECO:0000303|PubMed:25628631};	A0A446V4U0_TRITD SubName: Full=Uncharacterized protein {ECO:0000313|EMBL:VAI42920.1};	--	GO:0098869,cellular oxidant detoxification; GO:0008150,biological_process; GO:0009636,response to toxic substance; GO:0009987,cellular process; GO:0042221,response to chemical; GO:0050896,response to stimulus; GO:0051716,cellular response to stimulus; GO:0070887,cellular response to chemical stimulus; GO:0097237,cellular response to toxic substance; GO:0098754,detoxification; GO:1990748,cellular …	--	--	--	--
Cluster-78338.5	89.5	98.31	92.51	268.75	284.2	294.26	274	261	273	678	786	725	1.52207	4.27086e-65	4.17527e-63	up	441	K25108 licheninase [EC:3.2.1.73] | (RefSeq) lichenase-2 (A)	--	unnamed protein product [Triticum turgidum subsp. durum]	GUB2_HORVU RecName: Full=Lichenase-2; EC=3.2.1.73; AltName: Full=(1->3,1->4)-beta-glucanase isoenzyme EII; AltName: Full=Endo-beta-1,3-1,4 glucanase II; AltName: Full=Lichenase II; Flags: Precursor; Fragment;	A0A446JZX6_TRITD SubName: Full=Uncharacterized protein {ECO:0000313|EMBL:VAH18625.1};	--	GO:0042972,licheninase activity; GO:0005975,carbohydrate metabolic process; GO:0003674,molecular_function; GO:0003824,catalytic activity; GO:0004553,hydrolase activity, hydrolyzing O-glycosyl compounds; GO:0016787,hydrolase activity; GO:0016798,hydrolase activity, acting on glycosyl bonds; GO:0008150,biological_process; GO:0008152,metabolic process; GO:0044238,primary metabolic process; GO:007170…	Glycosyl hydrolases family 17	--	--	--
Cluster-86187.0	0.97	0.96	0.64	6.41	5.41	5.93	103	88	66	571	515	529	2.73881	5.16689e-65	5.03868e-63	up	4532	K08711 ATP-binding cassette, subfamily G (WHITE), member 2, PDR | (RefSeq) ABC transporter G family member 39 (A)	ko02010: ABC transporters	hypothetical protein ZWY2020_025550 [Hordeum vulgare]	AB39G_ORYSJ RecName: Full=ABC transporter G family member 39 {ECO:0000303|PubMed:18299247}; Short=OsABCG39 {ECO:0000303|PubMed:18299247}; AltName: Full=Pleiotropic drug resistance protein 7 {ECO:0000303|PubMed:12644668, ECO:0000303|PubMed:16506311}; Short=OsPDR7 {ECO:0000303|PubMed:16506311};	A0A8I6Y1A2_HORVV SubName: Full=Uncharacterized protein {ECO:0000313|EnsemblPlants:HORVU.MOREX.r3.6HG0577120.1};	Pleiotropic drug resistance proteins (PDR1-15), ABC superfamily	GO:0016021,integral component of membrane; GO:0140359,ABC-type transporter activity; GO:0005524,ATP binding; GO:0003674,molecular_function; GO:0005215,transporter activity; GO:0015399,primary active transmembrane transporter activity; GO:0022804,active transmembrane transporter activity; GO:0022857,transmembrane transporter activity; GO:0042626,ATPase-coupled transmembrane transporter activity; G…	ABC-2 type transporter	--	--	--
Cluster-111333.0	12.8	12.6	15.37	40.33	45.28	44	348	295	406	920	1109	1003	1.61838	5.7646e-65	5.61457e-63	up	1475	K17637 exocyst complex component 2 | (RefSeq) exocyst complex component SEC5B-like isoform X1 (A)	--	uncharacterized protein LOC125515688 [Triticum urartu]	--	A0A3B6NP93_WHEAT SubName: Full=Uncharacterized protein {ECO:0000313|EnsemblPlants:TraesCS6A02G181500.1};	--	GO:0016021,integral component of membrane; GO:0005575,cellular_component; GO:0016020,membrane; GO:0031224,intrinsic component of membrane; GO:0110165,cellular anatomical entity	--	--	--	--
Cluster-125577.6	38.31	40.47	37.76	17.8	20.23	17.65	1760	1610	1696	689	836	683	-1.11513	5.99026e-65	5.82712e-63	down	2250	K17500 integrin-linked kinase-associated serine/threonine phosphatase 2C [EC:3.1.3.16] | (RefSeq) WAT1-related protein At3g18200 isoform X1 (A)	--	hypothetical protein CFC21_059120 [Triticum aestivum]	WTR31_ARATH RecName: Full=WAT1-related protein At4g08290;	A0A453J0J3_AEGTS RecName: Full=WAT1-related protein {ECO:0000256|RuleBase:RU363077};	--	GO:0016021,integral component of membrane; GO:0005886,plasma membrane; GO:0022857,transmembrane transporter activity; GO:0003674,molecular_function; GO:0005215,transporter activity; GO:0005575,cellular_component; GO:0016020,membrane; GO:0031224,intrinsic component of membrane; GO:0110165,cellular anatomical entity; GO:0071944,cell periphery	EamA-like transporter family	--	--	--
[truncated: 13,673 more rows]
