# Supplementary material for: Integrated transcriptomic, proteomic and metabolomic analyses revealing the roles of amino acid and sucrose metabolism in augmenting drought tolerance in Agropyron mongolicum
Source: Front Plant Sci. 2024 Dec 16;15:1515944. doi: 10.3389/fpls.2024.1515944 (PMC11685866; doi:10.3389/fpls.2024.1515944)
Supplement: Supplementary file 5 [file Table4.xlsx]

## Sheet: Sheet2
Index	Compounds	VIP	Fold_Change	Type
Zbfn013528	Beta-Hydroxypalmitic Acid*	1.38	2.15179	up
MW0105791	Asn-Pro-Lys	1.39	4.34569	up
MW0105931	Aspl-pro	1.37617	8.15707	up
Lcsp001861	Leu-Pro	1.38585	2.29899	up
Lmfp005484	Demissine	1.35288	42.8798	up
MWS2032	6-Methylnicotinamide	1.37454	7.40501	up
Hahp000801	alanine betaine	1.39126	4.05227	up
