# Supplementary material for: Integrated transcriptomic, proteomic and metabolomic analyses revealing the roles of amino acid and sucrose metabolism in augmenting drought tolerance in Agropyron mongolicum
Source: Front Plant Sci. 2024 Dec 16;15:1515944. doi: 10.3389/fpls.2024.1515944 (PMC11685866; doi:10.3389/fpls.2024.1515944)
Supplement: Supplementary file 6 [file Table5.xlsx]

## Sheet: Sheet1
Index	Compounds	VIP	Fold_Change	Type
Zmhn001703	5-O-Galloyl-D-hamamelose*	1.28077	0.0718886	down
Wacn003131	2-O-P-Coumaroylhydroxycitric Acid	1.25382	0.136883	down
Hmbp006861	1,2-O-Diferuloylglycerol*	1.28005	0.138666	down
Wayn004603	Tricetin 3'-glucuronide*	1.21913	0.0809036	down
pmb3032	Tricin-7-O-(2''-Malonyl)rhamnoside	1.22586	0.0870735	down
mws0628	4-Hydroxybenzaldehyde	1.27128	0.360304	down
Zmpn000095	Sorbitol-6-phosphate	1.21197	0.424563	down
MWS0442	Maltotriose	1.27885	0.456787	down
