# Supplementary material for: Integrated transcriptomic, proteomic and metabolomic analyses revealing the roles of amino acid and sucrose metabolism in augmenting drought tolerance in Agropyron mongolicum
Source: Front Plant Sci. 2024 Dec 16;15:1515944. doi: 10.3389/fpls.2024.1515944 (PMC11685866; doi:10.3389/fpls.2024.1515944)
Supplement: Supplementary file 7 [file Table6.xlsx]

## Sheet: Sheet1
ID	shoot-CK-1_fpkm	shoot-CK-2_fpkm	shoot-CK-3_fpkm	shoot-D-24h-1_fpkm	shoot-D-24h-2_fpkm	shoot-D-24h-3_fpkm	shoot-CK-1_count	shoot-CK-2_count	shoot-CK-3_count	shoot-D-24h-1_count	shoot-D-24h-2_count	shoot-D-24h-3_count	log2FoldChange	pvalue	padj	regulated	Length	KEGG	KEGG pathway	NR	Swissprot	TrEMBL	KOG	GO	Pfam	TF-Family	TF-Category	TF-Classification
Cluster-100665.9	76.41	73.35	76.65	277.48	274.57	292.3	3444	3619	3383	11913	13830	12420	1.93554	0	0	up	3046	K03113 translation initiation factor 1 | (RefSeq) LOW QUALITY PROTEIN: protein translation factor SUI1 homolog (A)	--	unnamed protein product [Triticum turgidum subsp. durum]	SUI1_MAIZE RecName: Full=Protein translation factor SUI1 homolog; AltName: Full=Protein GOS2;	A0A446KVM8_TRITD RecName: Full=SUI1 domain-containing protein {ECO:0000259|PROSITE:PS50296};	Translation initiation factor 1 (eIF-1/SUI1)	GO:0003723,RNA binding; GO:0003743,translation initiation factor activity; GO:0003674,molecular_function; GO:0003676,nucleic acid binding; GO:0005488,binding; GO:0097159,organic cyclic compound binding; GO:1901363,heterocyclic compound binding; GO:0008135,translation factor activity, RNA binding; GO:0045182,translation regulator activity; GO:0090079,translation regulator activity, nucleic acid bi…	Translation initiation factor SUI1	--	--	--
Cluster-101287.1	93.9	97.68	95.23	248.87	253.2	250.21	4148	4755	4168	10478	12501	10378	1.41695	0	0	up	2146	K07513 acetyl-CoA acyltransferase 1 [EC:2.3.1.16] | (RefSeq) 3-ketoacyl-CoA thiolase 2, peroxisomal (A)	ko00071: Fatty acid degradation; ko00280: Valine, leucine and isoleucine degradation; ko00592: alpha-Linolenic acid metabolism; ko01040: Biosynthesis of unsaturated fatty acids; ko01100: Metabolic pathways; ko01110: Biosynthesis of secondary metabolites; ko01212: Fatty acid metabolism; ko04146: Peroxisome	3-ketoacyl-CoA thiolase-like protein [Hordeum vulgare]	THIK2_ARATH RecName: Full=3-ketoacyl-CoA thiolase 2, peroxisomal; EC=2.3.1.16; AltName: Full=Acetyl-CoA acyltransferase 2; AltName: Full=Beta-ketothiolase 2; AltName: Full=Peroxisomal 3-oxoacyl-CoA thiolase 2; AltName: Full=Peroxisome defective protein 1; Flags: Precursor;	F2CXK6_HORVV SubName: Full=Predicted protein {ECO:0000313|EMBL:BAJ87577.1};	3-oxoacyl CoA thiolase	GO:0005783,endoplasmic reticulum; GO:0009514,glyoxysome; GO:0005739,mitochondrion; GO:0005730,nucleolus; GO:0005777,peroxisome; GO:0000325,plant-type vacuole; GO:0003988,acetyl-CoA C-acyltransferase activity; GO:0006635,fatty acid beta-oxidation; GO:0006633,fatty acid biosynthetic process; GO:0010111,glyoxysome organization; GO:0009695,jasmonic acid biosynthetic process; GO:0031408,oxylipin biosy…	Thiolase, N-terminal domain	--	--	--
Cluster-101306.13	7.85	7.31	7.42	64.66	60.91	63.85	1191	1300	1297	9496	11127	9298	3.04596	0	0	up	8124	K14497 protein phosphatase 2C [EC:3.1.3.16] | (RefSeq) probable protein phosphatase 2C 30 (A)	ko04016: MAPK signaling pathway - plant; ko04075: Plant hormone signal transduction	protein ALP1-like isoform X1 [Triticum urartu]	P2C30_ORYSJ RecName: Full=Probable protein phosphatase 2C 30 {ECO:0000305}; Short=OsPP2C30 {ECO:0000303|PubMed:19021904}; EC=3.1.3.16 {ECO:0000305};	B9FSA9_ORYSJ RecName: Full=DDE Tnp4 domain-containing protein {ECO:0000259|Pfam:PF13359};	Serine/threonine protein phosphatase	GO:0005634,nucleus; GO:0046872,metal ion binding; GO:0017018,myosin phosphatase activity; GO:0004722,protein serine/threonine phosphatase activity; GO:0009738,abscisic acid-activated signaling pathway; GO:0035970,peptidyl-threonine dephosphorylation; GO:0009845,seed germination; GO:0090351,seedling development; GO:0003674,molecular_function; GO:0005488,binding; GO:0043167,ion binding; GO:0043169,…	Myb/SANT-like DNA-binding domain	--	--	--
Cluster-101336.1	41.33	44.27	44.26	166.92	163.82	158.45	1509	1783	1590	5823	6679	5461	1.94529	0	0	up	2641	K00232 acyl-CoA oxidase [EC:1.3.3.6] | (RefSeq) acyl-coenzyme A oxidase 4, peroxisomal (A)	ko00071: Fatty acid degradation; ko00410: beta-Alanine metabolism; ko00592: alpha-Linolenic acid metabolism; ko00640: Propanoate metabolism; ko01040: Biosynthesis of unsaturated fatty acids; ko01100: Metabolic pathways; ko01110: Biosynthesis of secondary metabolites; ko01200: Carbon metabolism; ko01212: Fatty acid metabolism; ko04146: Peroxisome	Acyl-coenzyme A oxidase 4, peroxisomal [Hordeum vulgare]	ACOX4_ARATH RecName: Full=Acyl-coenzyme A oxidase 4, peroxisomal {ECO:0000305}; Short=AOX 4 {ECO:0000305}; EC=1.3.3.6 {ECO:0000269|PubMed:10212254}; AltName: Full=G6p {ECO:0000312|EMBL:AAB18129.1}; AltName: Full=Short-chain acyl-CoA oxidase {ECO:0000303|PubMed:10212254}; Short=AtCX4 {ECO:0000303|PubMed:12682048}; Short=AtG6 {ECO:0000312|EMBL:AAB18129.1}; Short=SAOX {ECO:0000305};	A0A8I6WBR4_HORVV SubName: Full=Uncharacterized protein {ECO:0000313|EnsemblPlants:HORVU.MOREX.r3.1HG0025620.1};	Glutaryl-CoA dehydrogenase	GO:0005829,cytosol; GO:0009514,glyoxysome; GO:0005777,peroxisome; GO:0003995,acyl-CoA dehydrogenase activity; GO:0003997,acyl-CoA oxidase activity; GO:0050660,flavin adenine dinucleotide binding; GO:1901149,salicylic acid binding; GO:0009793,embryo development ending in seed dormancy; GO:0006635,fatty acid beta-oxidation; GO:0046459,short-chain fatty acid metabolic process; GO:0003674,molecular_f…	Acyl-CoA dehydrogenase, C-terminal domain	--	--	--
Cluster-101552.2	4.5	3.88	3.78	68.09	62.22	64.57	129	123	107	1844	1950	1723	4.00991	0	0	up	1859	K13080 flavanone 7-O-glucoside 2''-O-beta-L-rhamnosyltransferase [EC:2.4.1.236] | (RefSeq) flavanone 7-O-glucoside 2''-O-beta-L-rhamnosyltransferase-like (A)	ko00941: Flavonoid biosynthesis; ko00944: Flavone and flavonol biosynthesis; ko01100: Metabolic pathways	UDP-glucosyltransferase 29-like [Triticum aestivum]	UGT29_PANGI RecName: Full=UDP-glucosyltransferase 29 {ECO:0000303|PubMed:25769286}; Short=UGTPg29 {ECO:0000303|PubMed:25769286, ECO:0000303|PubMed:29509695}; EC=2.4.1.365 {ECO:0000269|PubMed:25320211, ECO:0000269|PubMed:25769286}; AltName: Full=UDP-glucosyltransferase 94B1 {ECO:0000303|PubMed:25320211}; Short=PgUGT94B1 {ECO:0000303|PubMed:25320211}; AltName: Full=UDP-glucosyltransferase 94Q2 {ECO…	A0A3B6C0Q6_WHEAT SubName: Full=Uncharacterized protein {ECO:0000313|EnsemblPlants:TraesCS2B02G132400.1.cds1};	UDP-glucuronosyl and UDP-glucosyl transferase	GO:0008194,UDP-glycosyltransferase activity; GO:0002238,response to molecule of fungal origin; GO:0016135,saponin biosynthetic process; GO:0046246,terpene biosynthetic process; GO:0016114,terpenoid biosynthetic process; GO:0003674,molecular_function; GO:0003824,catalytic activity; GO:0016740,transferase activity; GO:0016757,glycosyltransferase activity; GO:0008150,biological_process; GO:0009605,r…	UDP-glucoronosyl and UDP-glucosyl transferase	--	--	--
Cluster-102081.3	61.4	70.04	63.44	283.41	274.3	278.01	1365	1706	1385	5957	6754	5761	2.12075	0	0	up	1193	K09873 aquaporin TIP | (RefSeq) probable aquaporin TIP2-2 (A)	--	probable aquaporin TIP2-2 [Aegilops tauschii subsp. strangulata]	TIP22_ORYSJ RecName: Full=Probable aquaporin TIP2-2; AltName: Full=Tonoplast intrinsic protein 2-2; Short=OsTIP2;2;	R7W1T1_AEGTA SubName: Full=Putative aquaporin TIP2-2 {ECO:0000313|EMBL:EMT13367.1};	Aquaporin (major intrinsic protein family)	GO:0016021,integral component of membrane; GO:0016020,membrane; GO:0005774,vacuolar membrane; GO:0015250,water channel activity; GO:0006833,water transport; GO:0003674,molecular_function; GO:0005215,transporter activity; GO:0005372,water transmembrane transporter activity; GO:0015267,channel activity; GO:0015318,inorganic molecular entity transmembrane transporter activity; GO:0022803,passive tra…	Major intrinsic protein	--	--	--
Cluster-102269.12	35.87	30.13	32.86	575.43	594.5	599	224	203	202	3280	4038	3367	4.14915	0	0	up	556	--	--	--	--	--	--	--	Late embryogenesis abundant protein	--	--	--
Cluster-102269.3	10.26	9.4	14.15	217.49	210.96	217.8	108	115	140	2159	2495	2085	4.27898	0	0	up	1266	--	--	--	--	--	--	--	Late embryogenesis abundant protein	--	--	--
Cluster-102269.5	14.13	17.26	15.46	351.1	358.82	338.67	186	249	200	4367	5226	4133	4.49847	0	0	up	834	--	--	embryonic protein DC-8-like isoform X2 [Triticum aestivum]	--	A0A453IVD6_AEGTS SubName: Full=Uncharacterized protein {ECO:0000313|EnsemblPlants:AET4Gv20689200.1};	--	--	Late embryogenesis abundant protein	--	--	--
Cluster-102269.8	3.39	2.9	2.53	46.53	49.7	46.58	132	124	96	1724	2158	1707	4.05085	0	0	up	1864	--	--	late embryogenesis abundant protein D-29-like [Triticum dicoccoides]	--	M8BBZ6_AEGTA SubName: Full=Uncharacterized protein {ECO:0000313|EMBL:EMT11521.1, ECO:0000313|EnsemblPlants:EMT11521};	--	--	Family of unknown function (DUF6527)	--	--	--
Cluster-102368.0	27.11	29.7	29.08	131	135.75	127.47	1074	1294	1128	4923	5982	4749	2.22694	0	0	up	2330	K02147 V-type H+-transporting ATPase subunit B | (RefSeq) V-type proton ATPase subunit B 2-like (A)	ko00190: Oxidative phosphorylation; ko01100: Metabolic pathways; ko04145: Phagosome	V-type proton ATPase subunit B 2 [Aegilops tauschii subsp. strangulata]	VATB2_ARATH RecName: Full=V-type proton ATPase subunit B2; Short=V-ATPase subunit B2; AltName: Full=Vacuolar H(+)-ATPase subunit B isoform 2; AltName: Full=Vacuolar proton pump subunit B2;	A0A453F8T6_AEGTS SubName: Full=Uncharacterized protein {ECO:0000313|EnsemblPlants:AET3Gv20611700.10};	Vacuolar H+-ATPase V1 sector, subunit B	GO:0000221,vacuolar proton-transporting V-type ATPase, V1 domain; GO:0005524,ATP binding; GO:0046961,proton-transporting ATPase activity, rotational mechanism; GO:0046034,ATP metabolic process; GO:0007035,vacuolar acidification; GO:0000166,nucleotide binding; GO:0003674,molecular_function; GO:0005488,binding; GO:0017076,purine nucleotide binding; GO:0030554,adenyl nucleotide binding; GO:0032553,r…	ATP synthase alpha/beta family, nucleotide-binding domain	--	--	--
Cluster-102518.0	2.54	1.91	2.24	49.13	53.79	52.2	100	82	86	1857	2377	1946	4.58846	0	0	up	1907	--	--	late embryogenesis abundant protein 1-like [Hordeum vulgare subsp. vulgare]	LEA1_ORYSI RecName: Full=Late embryogenesis abundant protein 1;	A0A453I748_AEGTS SubName: Full=Uncharacterized protein {ECO:0000313|EnsemblPlants:AET4Gv20463400.2};	--	--	Late embryogenesis abundant protein	--	--	--
Cluster-102665.6	68.48	68.77	68.31	286.85	271.18	297.69	1299	1427	1272	5138	5689	5250	2.07689	0	0	up	1063	K08360 transmembrane ascorbate-dependent reductase [EC:7.2.1.3] | (RefSeq) probable ascorbate-specific transmembrane electron transporter 1 (A)	--	predicted protein, partial [Hordeum vulgare subsp. vulgare]	ACET1_ORYSJ RecName: Full=Probable ascorbate-specific transmembrane electron transporter 1; EC=1.-.-.-; AltName: Full=Cytochrome b561-1;	F2DUR1_HORVV SubName: Full=Predicted protein {ECO:0000313|EMBL:BAJ98832.1}; Flags: Fragment;	Cytochrome b	GO:0016021,integral component of membrane; GO:0046872,metal ion binding; GO:0016491,oxidoreductase activity; GO:0003674,molecular_function; GO:0005488,binding; GO:0043167,ion binding; GO:0043169,cation binding; GO:0003824,catalytic activity; GO:0005575,cellular_component; GO:0016020,membrane; GO:0031224,intrinsic component of membrane; GO:0110165,cellular anatomical entity	Eukaryotic cytochrome b561	--	--	--
Cluster-103178.12	6.07	5.23	5.83	28.72	28.44	27.96	788	749	743	3553	4123	3430	2.34691	0	0	up	5491	K01968 3-methylcrotonyl-CoA carboxylase alpha subunit [EC:6.4.1.4] | (RefSeq) methylcrotonoyl-CoA carboxylase subunit alpha, mitochondrial (A)	ko00280: Valine, leucine and isoleucine degradation; ko01100: Metabolic pathways	methylcrotonoyl-CoA carboxylase subunit alpha, mitochondrial [Triticum dicoccoides]	MCCA_ORYSJ RecName: Full=Methylcrotonoyl-CoA carboxylase subunit alpha, mitochondrial; Short=MCCase subunit alpha; EC=6.4.1.4; AltName: Full=3-methylcrotonyl-CoA carboxylase 1; AltName: Full=3-methylcrotonyl-CoA:carbon dioxide ligase subunit alpha; Flags: Precursor;	A0A446SPW4_TRITD SubName: Full=Uncharacterized protein {ECO:0000313|EMBL:VAI13156.1};	3-Methylcrotonyl-CoA carboxylase, biotin-containing subunit/Propionyl-CoA carboxylase, alpha chain/Acetyl-CoA carboxylase, biotin carboxylase subunit	GO:0005759,mitochondrial matrix; GO:0005739,mitochondrion; GO:0005524,ATP binding; GO:0046872,metal ion binding; GO:0004485,methylcrotonoyl-CoA carboxylase activity; GO:0006552,leucine catabolic process; GO:0000166,nucleotide binding; GO:0003674,molecular_function; GO:0005488,binding; GO:0017076,purine nucleotide binding; GO:0030554,adenyl nucleotide binding; GO:0032553,ribonucleotide binding; GO…	Carbamoyl-phosphate synthase L chain, ATP binding domain	--	--	--
Cluster-103292.0	10.8	12.87	12.71	71.44	71.51	71.36	366	476	420	2279	2686	2274	2.58691	0	0	up	2124	K01191 alpha-mannosidase [EC:3.2.1.24] | (RefSeq) alpha-mannosidase At3g26720-like (A)	ko00511: Other glycan degradation	uncharacterized protein LOC119322353 [Triticum dicoccoides]	--	A0A446W5P7_TRITD RecName: Full=C2H2-type domain-containing protein {ECO:0000259|PROSITE:PS00028};	--	--	Protein of unknown function (DUF1644)	--	--	--
Cluster-103500.0	9.6	11.41	10.1	172.04	175.07	169.46	454	593	469	7725	9215	7531	4.0788	0	0	up	2302	K00029 malate dehydrogenase (oxaloacetate-decarboxylating)(NADP+) [EC:1.1.1.40] | (RefSeq) NADP-dependent malic enzyme-like (A)	ko00620: Pyruvate metabolism; ko00710: Carbon fixation in photosynthetic organisms; ko01100: Metabolic pathways; ko01200: Carbon metabolism	NADP-dependent malic enzyme-like [Triticum urartu]	MAOX_PHAVU RecName: Full=NADP-dependent malic enzyme; Short=NADP-ME; EC=1.1.1.40;	A0A3B6GYC1_WHEAT RecName: Full=Malic enzyme {ECO:0000256|RuleBase:RU003426};	NADP+-dependent malic enzyme	GO:0005737,cytoplasm; GO:0004471,malate dehydrogenase (decarboxylating) (NAD+) activity; GO:0004473,malate dehydrogenase (decarboxylating) (NADP+) activity; GO:0046872,metal ion binding; GO:0051287,NAD binding; GO:0008948,oxaloacetate decarboxylase activity; GO:0006108,malate metabolic process; GO:0003674,molecular_function; GO:0003824,catalytic activity; GO:0004470,malic enzyme activity; GO:0016…	Malic enzyme, NAD binding domain	--	--	--
Cluster-103693.1	57.89	54.43	51.51	561.03	587.19	563.94	1064	1090	927	9726	11931	9631	3.40667	0	0	up	1306	K07025 putative hydrolase of the HAD superfamily | (RefSeq) suppressor of disruption of TFIIS-like (A)	--	suppressor of disruption of TFIIS-like [Triticum urartu]	--	A0A3B6I011_WHEAT SubName: Full=Uncharacterized protein {ECO:0000313|EnsemblPlants:TraesCS4A02G275300.2};	Haloacid dehalogenase-like hydrolase	--	--	--	--	--
Cluster-104010.0	26.19	25.5	26.62	119.49	121.01	115.14	1604	1717	1600	6951	8245	6630	2.21229	0	0	up	2850	K15920 xylan 1,4-beta-xylosidase [EC:3.2.1.37] | (RefSeq) hypothetical protein (A)	ko00520: Amino sugar and nucleotide sugar metabolism; ko01100: Metabolic pathways	probable beta-D-xylosidase 6 [Triticum dicoccoides]	BXL6_ARATH RecName: Full=Probable beta-D-xylosidase 6; Short=AtBXL6; EC=3.2.1.-; Flags: Precursor;	A0A3B6C9P2_WHEAT RecName: Full=Fn3_like domain-containing protein {ECO:0000259|SMART:SM01217};	--	GO:0005829,cytosol; GO:0005576,extracellular region; GO:0000325,plant-type vacuole; GO:0005773,vacuole; GO:0046556,alpha-L-arabinofuranosidase activity; GO:0009044,xylan 1,4-beta-xylosidase activity; GO:0031222,arabinan catabolic process; GO:0045493,xylan catabolic process; GO:0003674,molecular_function; GO:0003824,catalytic activity; GO:0004553,hydrolase activity, hydrolyzing O-glycosyl compound…	Glycosyl hydrolase family 3 N terminal domain	--	--	--
Cluster-10489.4	3.19	3.6	3.2	43.8	39.48	38.87	158	196	155	2061	2177	1810	3.63944	0	0	up	2283	K03265 peptide chain release factor subunit 1 | (RefSeq) eukaryotic peptide chain release factor subunit 1-2-like (A)	ko03015: mRNA surveillance pathway	eukaryotic peptide chain release factor subunit 1-2-like [Triticum dicoccoides]	ERF1Y_ARATH RecName: Full=Eukaryotic peptide chain release factor subunit 1-2; Short=Eukaryotic release factor 1-2; Short=eRF1-2; AltName: Full=Omnipotent suppressor protein 1 homolog 2; Short=SUP1 homolog 2;	A0A3B5YZD4_WHEAT RecName: Full=eRF1_1 domain-containing protein {ECO:0000259|SMART:SM01194};	Peptide chain release factor 1 (eRF1)	GO:0005829,cytosol; GO:0005576,extracellular region; GO:0018444,translation release factor complex; GO:1990825,sequence-specific mRNA binding; GO:0003747,translation release factor activity; GO:0016149,translation release factor activity, codon specific; GO:0002184,cytoplasmic translational termination; GO:0040008,regulation of growth; GO:0006415,translational termination; GO:0003674,molecular_fu…	eRF1 domain 2	--	--	--
Cluster-105905.3	39.94	39.85	38.41	153.82	160.66	160.58	2215	2432	2092	8107	9923	8380	2.03537	0	0	up	2519	K14493 gibberellin receptor GID1 [EC:3.-.-.-] | (RefSeq) gibberellin receptor GID1-like (A)	ko04075: Plant hormone signal transduction	gibberellin receptor GID1-like [Triticum dicoccoides]	GID1_ORYSJ RecName: Full=Gibberellin receptor GID1 {ECO:0000303|PubMed:16193045}; EC=3.-.-.- {ECO:0000305}; AltName: Full=Gibberellin-insensitive dwarf protein 1 {ECO:0000303|PubMed:16193045}; AltName: Full=Protein GIBBERELLIN INSENSITIVE DWARF1 {ECO:0000303|PubMed:16193045};	A0A452Z3B5_AEGTS RecName: Full=Abhydrolase_3 domain-containing protein {ECO:0000259|Pfam:PF07859};	Arylacetamide deacetylase	GO:0005737,cytoplasm; GO:0005634,nucleus; GO:0010331,gibberellin binding; GO:0016787,hydrolase activity; GO:0048444,floral organ morphogenesis; GO:0009740,gibberellic acid mediated signaling pathway; GO:0009939,positive regulation of gibberellic acid mediated signaling pathway; GO:0010325,raffinose family oligosaccharide biosynthetic process; GO:0009739,response to gibberellin; GO:0003674,molecul…	alpha/beta hydrolase fold	--	--	--
Cluster-10646.5	13.5	10.33	12.37	421.32	427.69	455.33	182	152	164	5325	6361	5646	5.18563	0	0	up	845	--	--	late embryogenesis abundant protein 6 [Aegilops tauschii subsp. strangulata]	--	A0A453QDA5_AEGTS SubName: Full=Uncharacterized protein {ECO:0000313|EnsemblPlants:AET7Gv20051400.1};	--	GO:0009793,embryo development ending in seed dormancy; GO:0000003,reproduction; GO:0003006,developmental process involved in reproduction; GO:0007275,multicellular organism development; GO:0008150,biological_process; GO:0009790,embryo development; GO:0009791,post-embryonic development; GO:0010154,fruit development; GO:0022414,reproductive process; GO:0032501,multicellular organismal process; GO:0…	Domain of unknown function (DUF6450)	--	--	--
Cluster-107106.7	139.9	128.54	106.79	3335.1	3173.31	3407.44	1115	1107	836	24762	27570	24617	4.72166	0	0	up	624	--	--	uncharacterized protein LOC119344914 [Triticum dicoccoides]	--	A0A8I6WHB0_HORVV RecName: Full=BOWMAN_BIRK domain-containing protein {ECO:0000259|SMART:SM00269};	--	--	--	--	--	--
Cluster-107802.7	8.54	5.52	6.09	111.71	121.69	122.54	156	134	151	2168	2813	2233	4.09088	0	0	up	2069	K03505 DNA polymerase delta subunit 4 | (RefSeq) uncharacterized protein LOC119349040 (A)	ko03030: DNA replication; ko03410: Base excision repair; ko03420: Nucleotide excision repair; ko03430: Mismatch repair; ko03440: Homologous recombination	thaumatin-like protein 1 [Aegilops tauschii subsp. strangulata]	CRJ34_CRYJA RecName: Full=Pathogenesis-related thaumatin-like protein 3.4 {ECO:0000305}; AltName: Allergen=Cry j 3.4 {ECO:0000303|PubMed:16203714}; Flags: Precursor;	M8BL56_AEGTA SubName: Full=Uncharacterized protein {ECO:0000313|EMBL:EMT03732.1, ECO:0000313|EnsemblPlants:EMT03732};	--	GO:0006952,defense response; GO:1904550,response to arachidonic acid; GO:0009607,response to biotic stimulus; GO:0009723,response to ethylene; GO:0009751,response to salicylic acid; GO:0009651,response to salt stress; GO:0006950,response to stress; GO:0008150,biological_process; GO:0050896,response to stimulus; GO:0010033,response to organic substance; GO:0033993,response to lipid; GO:0042221,res…	Thaumatin family	--	--	--
Cluster-109220.3	33.45	35.7	31.41	202.98	207	203.38	910	1070	844	5224	6237	5158	2.62324	0	0	up	1406	--	--	uncharacterized protein LOC123098557 [Triticum aestivum]	--	A0A446SDV4_TRITD SubName: Full=Uncharacterized protein {ECO:0000313|EMBL:VAI09282.1};	--	--	Protein of unknown function (DUF3110)	--	--	--
Cluster-109254.8	6.62	6.77	6.91	56.23	53.66	55.59	443	499	454	3582	4005	3508	3.05793	0	0	up	2979	K14157 alpha-aminoadipic semialdehyde synthase [EC:1.5.1.8 1.5.1.9] | (RefSeq) alpha-aminoadipic semialdehyde synthase-like (A)	ko00310: Lysine degradation; ko01100: Metabolic pathways; ko01110: Biosynthesis of secondary metabolites	alpha-aminoadipic semialdehyde synthase-like isoform X1 [Triticum aestivum]	AASS_ARATH RecName: Full=Alpha-aminoadipic semialdehyde synthase; AltName: Full=cAt-LKR/SDH; Short=LKR/SDH; Includes: RecName: Full=Lysine ketoglutarate reductase; Short=LKR; EC=1.5.1.8; Includes: RecName: Full=Saccharopine dehydrogenase; EC=1.5.1.9; AltName: Full=cAt-SDH; Short=SDH;	A0A446VR66_TRITD SubName: Full=Uncharacterized protein {ECO:0000313|EMBL:VAI50362.1};	Lysine-ketoglutarate reductase/saccharopine dehydrogenase	GO:0005737,cytoplasm; GO:0047131,saccharopine dehydrogenase (NAD+, L-glutamate-forming) activity; GO:0047130,saccharopine dehydrogenase (NADP+, L-lysine-forming) activity; GO:0004753,saccharopine dehydrogenase activity; GO:0033512,L-lysine catabolic process to acetyl-CoA via saccharopine; GO:0019878,lysine biosynthetic process via aminoadipic acid; GO:0003674,molecular_function; GO:0003824,cataly…	Saccharopine dehydrogenase C-terminal domain	--	--	--
Cluster-109254.9	16.34	14.21	15.74	158.74	156.67	178.12	1175	1125	1111	10859	12560	12072	3.44582	0	0	up	3176	K14157 alpha-aminoadipic semialdehyde synthase [EC:1.5.1.8 1.5.1.9] | (RefSeq) alpha-aminoadipic semialdehyde synthase-like (A)	ko00310: Lysine degradation; ko01100: Metabolic pathways; ko01110: Biosynthesis of secondary metabolites	alpha-aminoadipic semialdehyde synthase-like isoform X2 [Triticum aestivum]	AASS_ARATH RecName: Full=Alpha-aminoadipic semialdehyde synthase; AltName: Full=cAt-LKR/SDH; Short=LKR/SDH; Includes: RecName: Full=Lysine ketoglutarate reductase; Short=LKR; EC=1.5.1.8; Includes: RecName: Full=Saccharopine dehydrogenase; EC=1.5.1.9; AltName: Full=cAt-SDH; Short=SDH;	A0A446VR66_TRITD SubName: Full=Uncharacterized protein {ECO:0000313|EMBL:VAI50362.1};	Lysine-ketoglutarate reductase/saccharopine dehydrogenase	GO:0005737,cytoplasm; GO:0047131,saccharopine dehydrogenase (NAD+, L-glutamate-forming) activity; GO:0047130,saccharopine dehydrogenase (NADP+, L-lysine-forming) activity; GO:0004753,saccharopine dehydrogenase activity; GO:0033512,L-lysine catabolic process to acetyl-CoA via saccharopine; GO:0019878,lysine biosynthetic process via aminoadipic acid; GO:0003674,molecular_function; GO:0003824,cataly…	Saccharopine dehydrogenase C-terminal domain	--	--	--
Cluster-109771.1	240.78	256.12	253.28	96.13	94.33	97.71	8597	10010	8874	3238	3731	3270	-1.3568	0	0	down	1738	K03405 magnesium chelatase subunit I [EC:6.6.1.1] | (RefSeq) magnesium-chelatase subunit ChlI, chloroplastic (A)	ko00860: Porphyrin metabolism; ko01100: Metabolic pathways; ko01110: Biosynthesis of secondary metabolites	magnesium-chelatase subunit ChlI, chloroplastic [Triticum aestivum]	CHLI_ORYSJ RecName: Full=Magnesium-chelatase subunit ChlI, chloroplastic; Short=Mg-chelatase subunit I; EC=6.6.1.1; AltName: Full=Mg-protoporphyrin IX chelatase subunit ChlI; AltName: Full=Protein CHLORINA 9; Flags: Precursor;	A0A3B6TX84_WHEAT RecName: Full=Mg-protoporphyrin IX chelatase {ECO:0000256|RuleBase:RU362087}; EC=6.6.1.1 {ECO:0000256|RuleBase:RU362087};	--	GO:0009570,chloroplast stroma; GO:0005524,ATP binding; GO:0016851,magnesium chelatase activity; GO:0015995,chlorophyll biosynthetic process; GO:0015979,photosynthesis; GO:0000166,nucleotide binding; GO:0003674,molecular_function; GO:0005488,binding; GO:0017076,purine nucleotide binding; GO:0030554,adenyl nucleotide binding; GO:0032553,ribonucleotide binding; GO:0032555,purine ribonucleotide bindi…	AAA lid domain	--	--	--
Cluster-110144.1	28.81	30.78	33.63	124.56	125.18	125.77	874	1026	1002	3678	4351	3715	2.08236	0	0	up	2684	K23948 NADH:quinone reductase (non-electrogenic) [EC:1.6.5.9] | (RefSeq) hypothetical protein (A)	--	putative nitronate monooxygenase [Triticum urartu]	--	M7YQL5_TRIUA SubName: Full=Putative nitronate monooxygenase {ECO:0000313|EMBL:EMS49722.1, ECO:0000313|EnsemblPlants:TRIUR3_13235-P1};	--	GO:0018580,nitronate monooxygenase activity; GO:0046686,response to cadmium ion; GO:0009610,response to symbiotic fungus; GO:0003674,molecular_function; GO:0003824,catalytic activity; GO:0004497,monooxygenase activity; GO:0016491,oxidoreductase activity; GO:0016701,oxidoreductase activity, acting on single donors with incorporation of molecular oxygen; GO:0016703,oxidoreductase activity, acting o…	Nitronate monooxygenase	--	--	--
Cluster-110271.0	31.39	32.28	34.61	98.4	96.49	97.35	1859	2104	2013	5539	6365	5427	1.60191	0	0	up	2669	--	--	pentatricopeptide repeat-containing protein At5g13770, chloroplastic [Hordeum vulgare subsp. vulgare]	PP379_ARATH RecName: Full=Pentatricopeptide repeat-containing protein At5g13770, chloroplastic; Flags: Precursor;	A0A8I6WGR1_HORVV SubName: Full=Uncharacterized protein {ECO:0000313|EnsemblPlants:HORVU.MOREX.r3.2HG0185890.1.CDS1};	FOG: PPR repeat	GO:0009507,chloroplast; GO:0003729,mRNA binding; GO:0009658,chloroplast organization; GO:0003674,molecular_function; GO:0003676,nucleic acid binding; GO:0003723,RNA binding; GO:0005488,binding; GO:0097159,organic cyclic compound binding; GO:1901363,heterocyclic compound binding; GO:0006996,organelle organization; GO:0008150,biological_process; GO:0009657,plastid organization; GO:0009987,cellular …	PPR repeat family	--	--	--
Cluster-110377.0	995.66	985.87	1009.67	486.4	479.74	480.96	41608	45291	41436	19292	22300	18872	-1.02055	0	0	down	2099	K00927 phosphoglycerate kinase [EC:2.7.2.3] | (RefSeq) phosphoglycerate kinase, chloroplastic (A)	ko00010: Glycolysis / Gluconeogenesis; ko00710: Carbon fixation in photosynthetic organisms; ko01100: Metabolic pathways; ko01110: Biosynthesis of secondary metabolites; ko01200: Carbon metabolism; ko01230: Biosynthesis of amino acids	phosphoglycerate kinase, chloroplastic [Aegilops tauschii subsp. strangulata]	PGKH_WHEAT RecName: Full=Phosphoglycerate kinase, chloroplastic; EC=2.7.2.3; Flags: Precursor;	A0A3B5ZZM6_WHEAT RecName: Full=Phosphoglycerate kinase {ECO:0000256|ARBA:ARBA00013061, ECO:0000256|RuleBase:RU000532}; EC=2.7.2.3 {ECO:0000256|ARBA:ARBA00013061, ECO:0000256|RuleBase:RU000532};	3-phosphoglycerate kinase	GO:0009507,chloroplast; GO:0005829,cytosol; GO:0043531,ADP binding; GO:0005524,ATP binding; GO:0004618,phosphoglycerate kinase activity; GO:0006094,gluconeogenesis; GO:0006096,glycolytic process; GO:0019253,reductive pentose-phosphate cycle; GO:0000166,nucleotide binding; GO:0003674,molecular_function; GO:0005488,binding; GO:0017076,purine nucleotide binding; GO:0030554,adenyl nucleotide binding;…	Phosphoglycerate kinase	--	--	--
Cluster-111333.0	13.53	14.9	13.26	112.58	109.35	107.64	368	445	355	2904	3307	2737	3.00424	0	0	up	1475	K17637 exocyst complex component 2 | (RefSeq) exocyst complex component SEC5B-like isoform X1 (A)	--	uncharacterized protein LOC125515688 [Triticum urartu]	--	A0A3B6NP93_WHEAT SubName: Full=Uncharacterized protein {ECO:0000313|EnsemblPlants:TraesCS6A02G181500.1};	--	GO:0016021,integral component of membrane; GO:0005575,cellular_component; GO:0016020,membrane; GO:0031224,intrinsic component of membrane; GO:0110165,cellular anatomical entity	--	--	--	--
Cluster-111415.0	87.28	82.14	83.38	542.63	527.15	544.27	2670	2757	2506	15743	17913	15593	2.70008	0	0	up	1534	--	--	stem-specific protein TSJT1 [Aegilops tauschii subsp. strangulata]	TSJT1_TOBAC RecName: Full=Stem-specific protein TSJT1;	A0A453DH62_AEGTS RecName: Full=DUF3700 domain-containing protein {ECO:0000259|SMART:SM01172};	--	--	Aluminium induced protein	--	--	--
Cluster-111885.60	5.58	5.13	5.49	105.18	101.29	99.98	215	217	208	3854	4349	3623	4.27307	0	0	up	1847	K00615 transketolase [EC:2.2.1.1] | (RefSeq) transketolase, chloroplastic-like (A)	ko00030: Pentose phosphate pathway; ko00710: Carbon fixation in photosynthetic organisms; ko01100: Metabolic pathways; ko01110: Biosynthesis of secondary metabolites; ko01200: Carbon metabolism; ko01230: Biosynthesis of amino acids	transketolase, chloroplastic-like [Triticum dicoccoides]	TKTC_MAIZE RecName: Full=Transketolase, chloroplastic; Short=TK; EC=2.2.1.1;	A0A446KJZ2_TRITD RecName: Full=Transketolase {ECO:0000256|ARBA:ARBA00013152}; EC=2.2.1.1 {ECO:0000256|ARBA:ARBA00013152};	Transketolase	GO:0009535,chloroplast thylakoid membrane; GO:0005829,cytosol; GO:0005509,calcium ion binding; GO:0050897,cobalt ion binding; GO:0030145,manganese ion binding; GO:0004802,transketolase activity; GO:0006098,pentose-phosphate shunt; GO:0019253,reductive pentose-phosphate cycle; GO:0003674,molecular_function; GO:0005488,binding; GO:0043167,ion binding; GO:0043169,cation binding; GO:0046872,metal ion…	Transketolase, thiamine diphosphate binding domain	--	--	--
Cluster-112482.0	382.88	415.42	414.86	156.54	160.85	157.22	20250	24172	21547	7865	9471	7820	-1.3251	0	0	down	2416	K04077 chaperonin GroEL [EC:5.6.1.7] | (RefSeq) ruBisCO large subunit-binding protein subunit beta, chloroplastic (A)	ko03018: RNA degradation	hypothetical protein ZWY2020_047734 [Hordeum vulgare]	CPNB1_ARATH RecName: Full=Chaperonin 60 subunit beta 1, chloroplastic; Short=CPN-60 beta 1; AltName: Full=60 kDa chaperonin subunit beta 1; AltName: Full=RuBisCO large subunit-binding protein subunit beta, chloroplastic; Flags: Precursor;	A0A453QEK4_AEGTS SubName: Full=Uncharacterized protein {ECO:0000313|EnsemblPlants:AET7Gv20079800.1};	Mitochondrial chaperonin, Cpn60/Hsp60p	GO:0048046,apoplast; GO:0009507,chloroplast; GO:0009941,chloroplast envelope; GO:0009570,chloroplast stroma; GO:0022626,cytosolic ribosome; GO:0005634,nucleus; GO:0010319,stromule; GO:0005524,ATP binding; GO:0140662,ATP-dependent protein folding chaperone; GO:0003729,mRNA binding; GO:0019904,protein domain specific binding; GO:0008219,cell death; GO:0051085,chaperone cofactor-dependent protein re…	TCP-1/cpn60 chaperonin family	--	--	--
Cluster-113252.2	327.91	343.08	346.19	93.47	97.35	95.11	13780	15859	14306	3731	4547	3745	-1.80509	0	0	down	2041	K04077 chaperonin GroEL [EC:5.6.1.7] | (RefSeq) Chaperonine 60 (A)	ko03018: RNA degradation	ruBisCO large subunit-binding protein subunit alpha, chloroplastic [Triticum aestivum]	RUBA_WHEAT RecName: Full=RuBisCO large subunit-binding protein subunit alpha, chloroplastic; AltName: Full=60 kDa chaperonin subunit alpha; AltName: Full=CPN-60 alpha; Flags: Precursor; Fragment;	A0A3B6U2Z7_WHEAT SubName: Full=Uncharacterized protein {ECO:0000313|EnsemblPlants:TraesCSU02G009200.1};	Mitochondrial chaperonin, Cpn60/Hsp60p	GO:0009507,chloroplast; GO:0005524,ATP binding; GO:0140662,ATP-dependent protein folding chaperone; GO:0006457,protein folding; GO:0042026,protein refolding; GO:0000166,nucleotide binding; GO:0003674,molecular_function; GO:0005488,binding; GO:0017076,purine nucleotide binding; GO:0030554,adenyl nucleotide binding; GO:0032553,ribonucleotide binding; GO:0032555,purine ribonucleotide binding; GO:003…	TCP-1/cpn60 chaperonin family	--	--	--
Cluster-113283.0	14.4	13.74	13.4	115.79	113.05	110.09	1225	1287	1119	9368	10719	8828	3.0583	0	0	up	3699	K15406 wax-ester synthase / diacylglycerol O-acyltransferase [EC:2.3.1.75 2.3.1.20] | (RefSeq) O-acyltransferase WSD1 (A)	ko00073: Cutin, suberine and wax biosynthesis	wax ester synthase/diacylglycerol acyltransferase 11-like [Triticum aestivum]	WSD11_ARATH RecName: Full=Wax ester synthase/diacylglycerol acyltransferase 11 {ECO:0000303|PubMed:18621978}; Short=WS/DGAT 11 {ECO:0000303|PubMed:18621978}; AltName: Full=Diacylglycerol O-acyltransferase WSD11 {ECO:0000303|PubMed:18621978}; EC=2.3.1.20 {ECO:0000250|UniProtKB:Q93ZR6}; AltName: Full=Long-chain-alcohol O-fatty-acyltransferase WSD11 {ECO:0000303|PubMed:18621978}; EC=2.3.1.75 {ECO:00…	A0A446NMH1_TRITD SubName: Full=Uncharacterized protein {ECO:0000313|EMBL:VAH63242.1};	--	GO:0005789,endoplasmic reticulum membrane; GO:0016021,integral component of membrane; GO:0005886,plasma membrane; GO:0102966,arachidoyl-CoA:1-dodecanol O-acyltransferase activity; GO:0004144,diacylglycerol O-acyltransferase activity; GO:0047196,long-chain-alcohol O-fatty-acyltransferase activity; GO:0048441,petal development; GO:0048446,petal morphogenesis; GO:0019432,triglyceride biosynthetic pr…	WS/DGAT C-terminal domain	--	--	--
Cluster-114380.0	5.39	4.88	5.36	102.3	97.83	103.82	276	274	269	4978	5579	5001	4.31485	0	0	up	2350	K11188 peroxiredoxin 6 [EC:1.11.1.7 1.11.1.27 3.1.1.-] | (RefSeq) 1-Cys peroxiredoxin PER1 (A)	ko00480: Glutathione metabolism; ko00940: Phenylpropanoid biosynthesis; ko01100: Metabolic pathways; ko01110: Biosynthesis of secondary metabolites	1-Cys peroxiredoxin PER1 [Triticum dicoccoides]	REHY_HORVU RecName: Full=1-Cys peroxiredoxin PER1; EC=1.11.1.24 {ECO:0000250|UniProtKB:P30041}; AltName: Full=B15C; AltName: Full=Rehydrin homolog; AltName: Full=Thioredoxin peroxidase; AltName: Full=Thioredoxin-dependent peroxiredoxin {ECO:0000305};	A0A446KQF8_TRITD RecName: Full=Peroxiredoxin {ECO:0000256|PIRNR:PIRNR000239}; EC=1.11.1.24 {ECO:0000256|PIRNR:PIRNR000239};	Alkyl hydroperoxide reductase, thiol specific antioxidant and related enzymes	GO:0005737,cytoplasm; GO:0005634,nucleus; GO:0008379,thioredoxin peroxidase activity; GO:0003674,molecular_function; GO:0003824,catalytic activity; GO:0004601,peroxidase activity; GO:0016209,antioxidant activity; GO:0016491,oxidoreductase activity; GO:0016684,oxidoreductase activity, acting on peroxide as acceptor; GO:0051920,peroxiredoxin activity; GO:0140824,thioredoxin-dependent peroxiredoxin …	AhpC/TSA family	--	--	--
Cluster-114536.2	107.38	109.42	113.76	409.3	410.93	391.98	3124	3494	3249	11180	13262	10660	1.8945	0	0	up	3683	K13525 transitional endoplasmic reticulum ATPase | (RefSeq) cell division cycle protein 48 homolog (A)	ko04141: Protein processing in endoplasmic reticulum	cysteine proteinase inhibitor 12 [Aegilops tauschii subsp. strangulata]	CYT12_ORYSJ RecName: Full=Cysteine proteinase inhibitor 12; AltName: Full=Oryzacystatin XII; Short=OC-XII; AltName: Full=Oryzacystatin-12; Flags: Precursor;	A0A453EQB7_AEGTS RecName: Full=Cysteine proteinase inhibitor {ECO:0000256|RuleBase:RU362130};	--	GO:0005576,extracellular region; GO:0004869,cysteine-type endopeptidase inhibitor activity; GO:0006952,defense response; GO:0003674,molecular_function; GO:0004857,enzyme inhibitor activity; GO:0004866,endopeptidase inhibitor activity; GO:0030234,enzyme regulator activity; GO:0030414,peptidase inhibitor activity; GO:0061134,peptidase regulator activity; GO:0061135,endopeptidase regulator activity;…	Cystatin domain	--	--	--
Cluster-115483.5	106.76	104.88	103.65	387.56	390.54	383.42	3491	3765	3335	12018	14217	11766	1.90767	0	0	up	1616	K01373 cathepsin F [EC:3.4.22.41] | (RefSeq) cysteine proteinase 1-like (A)	ko04626: Plant-pathogen interaction	cysteine proteinase 1 [Aegilops tauschii subsp. strangulata]	CYSP1_MAIZE RecName: Full=Cysteine proteinase 1; EC=3.4.22.-; Flags: Precursor;	R7WAZ8_AEGTA SubName: Full=Cysteine proteinase 1 {ECO:0000313|EMBL:EMT16425.1, ECO:0000313|EnsemblPlants:EMT16425};	Cysteine proteinase Cathepsin F	GO:0005615,extracellular space; GO:0005764,lysosome; GO:0004197,cysteine-type endopeptidase activity; GO:0051603,proteolysis involved in protein catabolic process; GO:0003674,molecular_function; GO:0003824,catalytic activity; GO:0004175,endopeptidase activity; GO:0008233,peptidase activity; GO:0008234,cysteine-type peptidase activity; GO:0016787,hydrolase activity; GO:0140096,catalytic activity, …	Papain family cysteine protease	--	--	--
Cluster-115868.3	641.78	646.57	585.72	110.63	108.64	103.4	8711	9643	7850	1463	1619	1297	-2.51467	0	0	down	875	K07151 dolichyl-diphosphooligosaccharide---protein glycosyltransferase [EC:2.4.99.18] | (RefSeq) dolichyl-diphosphooligosaccharide--protein glycosyltransferase subunit STT3B-like isoform X1 (A)	ko00510: N-Glycan biosynthesis; ko00513: Various types of N-glycan biosynthesis; ko01100: Metabolic pathways; ko04141: Protein processing in endoplasmic reticulum	putative lipid-binding protein AIR1B [Triticum urartu]	ERLL1_ARATH RecName: Full=pEARLI1-like lipid transfer protein 1; AltName: Full=Protein AZELAIC ACID INDUCED 1; Flags: Precursor;	A0A8I6XGP3_HORVV RecName: Full=AAI domain-containing protein {ECO:0000259|SMART:SM00499};	--	GO:0048046,apoplast; GO:0009507,chloroplast; GO:0009707,chloroplast outer membrane; GO:0005783,endoplasmic reticulum; GO:0009506,plasmodesma; GO:0043621,protein self-association; GO:0070417,cellular response to cold; GO:0009631,cold acclimation; GO:0050832,defense response to fungus; GO:0009682,induced systemic resistance; GO:0009626,plant-type hypersensitive response; GO:0009627,systemic acquire…	Hydrophobic seed protein	--	--	--
Cluster-115898.0	13	13.17	11.73	153.48	142.59	146.91	384	428	342	4287	4662	4050	3.56229	0	0	up	1582	K09338 homeobox-leucine zipper protein | (RefSeq) homeobox-leucine zipper protein ATHB-12-like (A)	--	hypothetical protein CFC21_088737, partial [Triticum aestivum]	HOX24_ORYSI RecName: Full=Homeobox-leucine zipper protein HOX24; AltName: Full=HD-ZIP protein HOX24; AltName: Full=Homeodomain transcription factor HOX24; AltName: Full=OsHox24;	N1QQN6_AEGTA SubName: Full=Homeobox-leucine zipper protein HOX24 {ECO:0000313|EMBL:EMT01676.1, ECO:0000313|EnsemblPlants:EMT01676};	Transcription factor HEX, contains HOX and HALZ domains	GO:0005634,nucleus; GO:0000981,DNA-binding transcription factor activity, RNA polymerase II-specific; GO:0043565,sequence-specific DNA binding; GO:0003674,molecular_function; GO:0003700,DNA-binding transcription factor activity; GO:0140110,transcription regulator activity; GO:0003676,nucleic acid binding; GO:0003677,DNA binding; GO:0005488,binding; GO:0097159,organic cyclic compound binding; GO:1…	Homeobox associated leucine zipper	HB-HD-ZIP	TF	HB->HB-HD-ZIP
Cluster-115940.29	4.62	7.01	4.97	14.34	17.47	14.94	274	297	300	1728	2138	1758	2.75393	0	0	up	5461	--	--	unnamed protein product [Triticum turgidum subsp. durum]	SRO2_ARATH RecName: Full=Probable inactive poly [ADP-ribose] polymerase SRO2; AltName: Full=Protein SIMILAR TO RCD ONE 2;	A0A446SA43_TRITD RecName: Full=Poly [ADP-ribose] polymerase {ECO:0000256|RuleBase:RU362114}; Short=PARP {ECO:0000256|RuleBase:RU362114}; EC=2.4.2.- {ECO:0000256|RuleBase:RU362114};	--	GO:0005634,nucleus; GO:0003950,NAD+ ADP-ribosyltransferase activity; GO:0003674,molecular_function; GO:0003824,catalytic activity; GO:0016740,transferase activity; GO:0016757,glycosyltransferase activity; GO:0016763,pentosyltransferase activity; GO:0005575,cellular_component; GO:0005622,intracellular anatomical structure; GO:0043226,organelle; GO:0043227,membrane-bounded organelle; GO:0043229,int…	Poly(ADP-ribose) polymerase catalytic domain	--	--	--
Cluster-116447.4	12.39	11.82	11.97	55.32	57.88	55.82	680	704	643	2898	3533	2866	2.26042	0	0	up	3299	--	--	unnamed protein product [Triticum turgidum subsp. durum]	--	A0A446LA13_TRITD SubName: Full=Uncharacterized protein {ECO:0000313|EMBL:VAH34370.1};	--	--	BRO1-like domain	--	--	--
Cluster-116774.2	7.82	6.32	7.04	53.79	54.86	51.44	274	254	234	2027	2393	2007	3.14012	0	0	up	2361	K07025 putative hydrolase of the HAD superfamily | (RefSeq) suppressor of disruption of TFIIS-like (A)	--	unnamed protein product [Triticum turgidum subsp. durum]	RR7_AGRST RecName: Full=30S ribosomal protein S7, chloroplastic;	A0A453H5F4_AEGTS SubName: Full=Uncharacterized protein {ECO:0000313|EnsemblPlants:AET4Gv20071200.1};	FOG: Reverse transcriptase	GO:0009507,chloroplast; GO:0015935,small ribosomal subunit; GO:0019843,rRNA binding; GO:0003735,structural constituent of ribosome; GO:0006412,translation; GO:0003674,molecular_function; GO:0003676,nucleic acid binding; GO:0003723,RNA binding; GO:0005488,binding; GO:0097159,organic cyclic compound binding; GO:1901363,heterocyclic compound binding; GO:0005198,structural molecule activity; GO:00065…	--	--	--	--
Cluster-11686.0	25.3	20.95	25.99	91.07	89.29	83.72	1395	1515	1410	5453	6381	4937	2.01929	0	0	up	3287	K00128 aldehyde dehydrogenase (NAD+) [EC:1.2.1.3] | (RefSeq) betaine aldehyde dehydrogenase, chloroplastic-like (A)	ko00010: Glycolysis / Gluconeogenesis; ko00053: Ascorbate and aldarate metabolism; ko00071: Fatty acid degradation; ko00280: Valine, leucine and isoleucine degradation; ko00310: Lysine degradation; ko00330: Arginine and proline metabolism; ko00340: Histidine metabolism; ko00380: Tryptophan metabolism; ko00410: beta-Alanine metabolism; ko00561: Glycerolipid metabolism; ko00620: Pyruvate metabolism…	SPX domain-containing membrane protein OsI_17046 [Triticum dicoccoides]	SPXM2_ORYSI RecName: Full=SPX domain-containing membrane protein OsI_17046;	A0A446LBR9_TRITD RecName: Full=SPX domain-containing protein {ECO:0000259|PROSITE:PS51382};	Predicted transporter/transmembrane protein	GO:0016021,integral component of membrane; GO:0022857,transmembrane transporter activity; GO:0003674,molecular_function; GO:0005215,transporter activity; GO:0005575,cellular_component; GO:0016020,membrane; GO:0031224,intrinsic component of membrane; GO:0110165,cellular anatomical entity	Major Facilitator Superfamily	--	--	--
Cluster-116979.1	90.67	97.63	99.25	278.69	289.62	272.51	3856	4565	4146	11252	13702	10885	1.57563	0	0	up	2003	K03781 catalase [EC:1.11.1.6] | (RefSeq) catalase isozyme 1 isoform X1 (A)	ko00380: Tryptophan metabolism; ko00630: Glyoxylate and dicarboxylate metabolism; ko01100: Metabolic pathways; ko01110: Biosynthesis of secondary metabolites; ko01200: Carbon metabolism; ko04016: MAPK signaling pathway - plant; ko04146: Peroxisome	catalase isozyme 1-like isoform X2 [Triticum dicoccoides]	CATA1_HORVU RecName: Full=Catalase isozyme 1; EC=1.11.1.6;	A0A0H4MC33_WHEAT RecName: Full=Catalase {ECO:0000256|ARBA:ARBA00012314, ECO:0000256|RuleBase:RU000498}; EC=1.11.1.6 {ECO:0000256|ARBA:ARBA00012314, ECO:0000256|RuleBase:RU000498};	Catalase	GO:0009514,glyoxysome; GO:0005886,plasma membrane; GO:0004096,catalase activity; GO:0020037,heme binding; GO:0046872,metal ion binding; GO:0007623,circadian rhythm; GO:0042744,hydrogen peroxide catabolic process; GO:1900034,regulation of cellular response to heat; GO:0009737,response to abscisic acid; GO:0009646,response to absence of light; GO:0046686,response to cadmium ion; GO:0009408,response…	Catalase	--	--	--
Cluster-117596.3	56.11	60.41	60.23	313.39	311.68	306.01	2045	2412	2157	10838	12678	10490	2.42784	0	0	up	2598	--	--	unnamed protein product [Triticum turgidum subsp. durum]	--	A0A446WJ65_TRITD SubName: Full=Uncharacterized protein {ECO:0000313|EMBL:VAI60180.1};	--	--	non-haem dioxygenase in morphine synthesis N-terminal	--	--	--
Cluster-117608.0	35.49	34.67	34.45	203.28	187.77	210.12	1575	1692	1501	8567	9273	8762	2.55048	0	0	up	2077	--	--	metallothionein-like protein type 2 [Aegilops tauschii subsp. strangulata]	MT1_COFAR RecName: Full=Metallothionein-like protein 1; Short=MT-1;	M8BG83_AEGTA SubName: Full=Metallothionein-like protein 4A {ECO:0000313|EMBL:EMT05738.1, ECO:0000313|EnsemblPlants:EMT05738};	Predicted metallothionein	GO:0046872,metal ion binding; GO:0003674,molecular_function; GO:0005488,binding; GO:0043167,ion binding; GO:0043169,cation binding	--	--	--	--
Cluster-117608.2	595.68	551.34	545.42	2819.56	2581.73	2841.23	6045	6078	5436	26789	28714	26383	2.28982	0	0	up	711	--	--	metallothionein-like protein type 2 [Aegilops tauschii subsp. strangulata]	MT1_COFAR RecName: Full=Metallothionein-like protein 1; Short=MT-1;	M8BG83_AEGTA SubName: Full=Metallothionein-like protein 4A {ECO:0000313|EMBL:EMT05738.1, ECO:0000313|EnsemblPlants:EMT05738};	Predicted metallothionein	GO:0046872,metal ion binding; GO:0003674,molecular_function; GO:0005488,binding; GO:0043167,ion binding; GO:0043169,cation binding	--	--	--	--
Cluster-117608.4	63.98	59.53	61.75	344.57	311.95	352.36	2747	2810	2603	14044	14898	14208	2.47252	0	0	up	2078	--	--	metallothionein-like protein type 2 [Aegilops tauschii subsp. strangulata]	MT1_COFAR RecName: Full=Metallothionein-like protein 1; Short=MT-1;	M8BG83_AEGTA SubName: Full=Metallothionein-like protein 4A {ECO:0000313|EMBL:EMT05738.1, ECO:0000313|EnsemblPlants:EMT05738};	Predicted metallothionein	GO:0046872,metal ion binding; GO:0003674,molecular_function; GO:0005488,binding; GO:0043167,ion binding; GO:0043169,cation binding	--	--	--	--
Cluster-117776.13	51.27	57.48	66.59	416.82	394.24	339.7	1007	1166	1024	4733	5793	4642	2.31005	0	0	up	1166	K00430 peroxidase [EC:1.11.1.7] | (RefSeq) peroxidase 2-like (A)	ko00940: Phenylpropanoid biosynthesis; ko01100: Metabolic pathways; ko01110: Biosynthesis of secondary metabolites	peroxidase 2-like [Triticum urartu]	PER2_MAIZE RecName: Full=Peroxidase 2; EC=1.11.1.7; AltName: Full=Plasma membrane-bound peroxidase 2; Short=pmPOX2; Flags: Precursor;	M7Z4A4_TRIUA RecName: Full=Peroxidase {ECO:0000256|RuleBase:RU362060}; EC=1.11.1.7 {ECO:0000256|RuleBase:RU362060};	--	GO:0005576,extracellular region; GO:0009505,plant-type cell wall; GO:0020037,heme binding; GO:0046872,metal ion binding; GO:0004601,peroxidase activity; GO:0032922,circadian regulation of gene expression; GO:0097167,circadian regulation of translation; GO:0042744,hydrogen peroxide catabolic process; GO:0042752,regulation of circadian rhythm; GO:0006979,response to oxidative stress; GO:0003674,mol…	Peroxidase	--	--	--
Cluster-118624.5	15.4	16.71	15.9	234.61	232.69	231.59	750	895	760	10857	12619	10608	3.89125	0	0	up	2250	K01177 beta-amylase [EC:3.2.1.2] | (RefSeq) beta-amylase 2, chloroplastic-like (A)	ko00500: Starch and sucrose metabolism; ko01100: Metabolic pathways; ko01110: Biosynthesis of secondary metabolites	beta-amylase 2, chloroplastic-like [Triticum dicoccoides]	BAMY2_ORYSJ RecName: Full=Beta-amylase 2, chloroplastic {ECO:0000305}; Short=OsBamy2 {ECO:0000303|PubMed:21512221}; EC=3.2.1.2 {ECO:0000269|PubMed:21512221}; AltName: Full=4-alpha-D-glucan maltohydrolase {ECO:0000305}; Flags: Precursor;	A0A3B6IYQ4_WHEAT RecName: Full=Beta-amylase {ECO:0000256|ARBA:ARBA00012594, ECO:0000256|RuleBase:RU000509}; EC=3.2.1.2 {ECO:0000256|ARBA:ARBA00012594, ECO:0000256|RuleBase:RU000509};	--	GO:0009507,chloroplast; GO:0102229,amylopectin maltohydrolase activity; GO:0016161,beta-amylase activity; GO:0000272,polysaccharide catabolic process; GO:0003674,molecular_function; GO:0003824,catalytic activity; GO:0004553,hydrolase activity, hydrolyzing O-glycosyl compounds; GO:0016787,hydrolase activity; GO:0016798,hydrolase activity, acting on glycosyl bonds; GO:0016160,amylase activity; GO:0…	Glycosyl hydrolase family 14	--	--	--
Cluster-118712.0	4.96	5.58	5.22	110.63	112.11	107.34	124	148	122	2604	3108	2497	4.44521	0	0	up	1381	K17991 peroxygenase [EC:1.11.2.3] | (RefSeq) peroxygenase-like (A)	ko00073: Cutin, suberine and wax biosynthesis	peroxygenase [Aegilops tauschii subsp. strangulata]	PXG_LILLO RecName: Full=Peroxygenase {ECO:0000305}; EC=1.11.2.3 {ECO:0000250|UniProtKB:O81270}; AltName: Full=Caleosin {ECO:0000303|PubMed:18632804};	A0A453ILR2_AEGTS SubName: Full=Uncharacterized protein {ECO:0000313|EnsemblPlants:AET4Gv20602400.1};	--	GO:0005783,endoplasmic reticulum; GO:0016020,membrane; GO:0012511,monolayer-surrounded lipid storage body; GO:0102070,18-hydroxyoleate peroxygenase activity; GO:0005509,calcium ion binding; GO:0020037,heme binding; GO:1990137,plant seed peroxidase activity; GO:0042803,protein homodimerization activity; GO:0010888,negative regulation of lipid storage; GO:0003674,molecular_function; GO:0003824,cata…	Caleosin related protein	--	--	--
Cluster-118746.4	0.81	0.79	1.31	237.08	228.03	209.28	41	43	65	11425	12877	9983	7.90894	0	0	up	2330	K00827 alanine-glyoxylate transaminase / (R)-3-amino-2-methylpropionate-pyruvate transaminase [EC:2.6.1.44 2.6.1.40] | (RefSeq) alanine--glyoxylate aminotransferase 2 homolog 3, mitochondrial-like (A)	ko00250: Alanine, aspartate and glutamate metabolism; ko00260: Glycine, serine and threonine metabolism; ko00270: Cysteine and methionine metabolism; ko00280: Valine, leucine and isoleucine degradation; ko01100: Metabolic pathways; ko01110: Biosynthesis of secondary metabolites	unnamed protein product [Triticum turgidum subsp. durum]	AGT23_ARATH RecName: Full=Alanine--glyoxylate aminotransferase 2 homolog 3, mitochondrial; EC=2.6.1.44; AltName: Full=Beta-alanine-pyruvate aminotransferase 3; Flags: Precursor;	A0A446K4K5_TRITD SubName: Full=Uncharacterized protein {ECO:0000313|EMBL:VAH20292.1};	Alanine-glyoxylate aminotransferase AGT2	GO:0005739,mitochondrion; GO:0008453,alanine-glyoxylate transaminase activity; GO:0030170,pyridoxal phosphate binding; GO:0043562,cellular response to nitrogen levels; GO:0009853,photorespiration; GO:0003674,molecular_function; GO:0003824,catalytic activity; GO:0008483,transaminase activity; GO:0016740,transferase activity; GO:0016769,transferase activity, transferring nitrogenous groups; GO:0005…	Aminotransferase class-III	--	--	--
Cluster-118909.0	9.46	10.98	9.18	109.28	122.61	117.03	164	208	156	1784	2345	1882	3.57269	0	0	up	999	K17506 protein phosphatase 1L [EC:3.1.3.16] | (RefSeq) probable protein phosphatase 2C 59 (A)	--	probable protein phosphatase 2C 59 [Triticum aestivum]	P2C59_ORYSJ RecName: Full=Probable protein phosphatase 2C 59; Short=OsPP2C59; EC=3.1.3.16; Flags: Precursor;	A0A3B6SHQ0_WHEAT RecName: Full=Protein-serine/threonine phosphatase {ECO:0000256|ARBA:ARBA00013081}; EC=3.1.3.16 {ECO:0000256|ARBA:ARBA00013081};	Serine/threonine protein phosphatase	GO:0046872,metal ion binding; GO:0017018,myosin phosphatase activity; GO:0004722,protein serine/threonine phosphatase activity; GO:0035970,peptidyl-threonine dephosphorylation; GO:0003674,molecular_function; GO:0005488,binding; GO:0043167,ion binding; GO:0043169,cation binding; GO:0003824,catalytic activity; GO:0004721,phosphoprotein phosphatase activity; GO:0016787,hydrolase activity; GO:0016788…	Protein phosphatase 2C	--	--	--
Cluster-119211.3	106.74	105.74	111.03	385.48	399.42	398.13	2691	2920	2747	9197	11157	9366	1.89413	0	0	up	1531	--	--	ricin B-like lectin R40C1 [Aegilops tauschii subsp. strangulata]	40C1_ORYSJ RecName: Full=Ricin B-like lectin R40C1 {ECO:0000305}; AltName: Full=Osr40c1 {ECO:0000303|PubMed:9265787};	A0A3B6JKB0_WHEAT RecName: Full=Ricin B-type lectin domain-containing protein {ECO:0000259|PROSITE:PS50231};	--	GO:0030246,carbohydrate binding; GO:0003674,molecular_function; GO:0005488,binding	Ricin-type beta-trefoil lectin domain-like	--	--	--
Cluster-119232.28	85.2	100.26	103.8	502.47	472.19	473.61	1802	2287	2146	10010	11040	9311	2.35232	0	0	up	1153	no KO assigned | (RefSeq) beta-fructofuranosidase, insoluble isoenzyme 7-like (A)	--	unnamed protein product [Triticum turgidum subsp. durum]	6FEH_WHEAT RecName: Full=Fructan 6-exohydrolase {ECO:0000312|EMBL:CAJ28591.1}; EC=3.2.1.154; Flags: Precursor;	A0A453D3X6_AEGTS SubName: Full=Uncharacterized protein {ECO:0000313|EnsemblPlants:AET2Gv21077700.14};	Beta-fructofuranosidase (invertase)	GO:0033949,fructan beta-(2,6)-fructosidase activity; GO:0005975,carbohydrate metabolic process; GO:0003674,molecular_function; GO:0003824,catalytic activity; GO:0004553,hydrolase activity, hydrolyzing O-glycosyl compounds; GO:0016787,hydrolase activity; GO:0016798,hydrolase activity, acting on glycosyl bonds; GO:0008150,biological_process; GO:0008152,metabolic process; GO:0044238,primary metaboli…	Glycosyl hydrolases family 32 N-terminal domain	--	--	--
Cluster-119759.3	59.23	61.21	63.15	231.87	226.5	222.25	3187	3604	3304	11696	13389	11145	1.90917	0	0	up	2928	K01097 N-acylneuraminate-9-phosphatase [EC:3.1.3.29] | (RefSeq) uncharacterized protein LOC116261997 (A)	ko00520: Amino sugar and nucleotide sugar metabolism; ko01100: Metabolic pathways; ko01250: Biosynthesis of nucleotide sugars	unnamed protein product [Triticum turgidum subsp. durum]	--	A0A446LZ09_TRITD SubName: Full=Uncharacterized protein {ECO:0000313|EMBL:VAH42851.1};	Predicted hydrolase (HAD superfamily)	--	Haloacid dehalogenase-like hydrolase	--	--	--
Cluster-120022.8	27.79	23.86	24.49	158.58	151.56	157.31	604	583	517	3121	3590	3093	2.58943	0	0	up	3337	K10807 ribonucleoside-diphosphate reductase subunit M1 [EC:1.17.4.1] | (RefSeq) uncharacterized protein LOC123153637 (A)	ko00230: Purine metabolism; ko00240: Pyrimidine metabolism; ko00480: Glutathione metabolism; ko01100: Metabolic pathways; ko01232: Nucleotide metabolism	hypothetical protein CFC21_104607 [Triticum aestivum]	LTPG9_ARATH RecName: Full=Non-specific lipid transfer protein GPI-anchored 9 {ECO:0000303|PubMed:23893219}; Short=AtLTPG-9 {ECO:0000303|PubMed:23893219}; Short=Protein LTP-GPI-ANCHORED 9 {ECO:0000303|PubMed:23893219}; Flags: Precursor;	A0A3B6SI64_WHEAT SubName: Full=Uncharacterized protein {ECO:0000313|EnsemblPlants:TraesCS7B02G346300.1.cds1};	--	GO:0031225,anchored component of membrane; GO:0005886,plasma membrane; GO:0005575,cellular_component; GO:0016020,membrane; GO:0031224,intrinsic component of membrane; GO:0110165,cellular anatomical entity; GO:0071944,cell periphery	Probable lipid transfer	--	--	--
Cluster-120136.2	8.45	7.75	7.25	292.72	289.25	298.46	92	91	77	2991	3460	2983	5.24743	0	0	up	741	--	--	uncharacterized protein LOC109769545 [Aegilops tauschii subsp. strangulata]	--	A0A3B6JQP9_WHEAT SubName: Full=Uncharacterized protein {ECO:0000313|EnsemblPlants:TraesCS4D02G326100.1.cds1};	--	--	--	--	--	--
Cluster-120167.16	17.6	12.7	11.95	413.19	403.82	422.79	182	128	115	3845	4436	3857	4.89728	0	0	up	1070	--	--	LEA2 protein [Triticum aestivum]	LEA1_HORVU RecName: Full=ABA-inducible protein PHV A1;	Q8GV48_WHEAT SubName: Full=LEA2 protein {ECO:0000313|EMBL:AAN74638.1};	--	--	Late embryogenesis abundant protein	--	--	--
Cluster-120167.21	21.63	27.02	25.43	913.58	853.86	924.33	165	211	183	6061	6685	5959	5.13359	0	0	up	654	--	--	unnamed protein product [Triticum turgidum subsp. durum]	LEA1_HORVU RecName: Full=ABA-inducible protein PHV A1;	A0A446K900_TRITD SubName: Full=Uncharacterized protein {ECO:0000313|EMBL:VAH21812.1};	--	--	Late embryogenesis abundant protein	--	--	--
Cluster-120167.23	7.87	6.82	8.08	223.72	211.51	225.29	82	78	83	2205	2441	2172	4.87758	0	0	up	726	--	--	unnamed protein product [Triticum turgidum subsp. durum]	LEA1_HORVU RecName: Full=ABA-inducible protein PHV A1;	A0A446K900_TRITD SubName: Full=Uncharacterized protein {ECO:0000313|EMBL:VAH21812.1};	--	--	Late embryogenesis abundant protein	--	--	--
Cluster-120167.25	13.98	17.7	18.77	601.93	573.72	593.94	495	686	651	20176	22861	19845	5.17071	0	0	up	2199	--	--	ABA-inducible protein PHV A1-like isoform X2 [Triticum aestivum]	LEA1_HORVU RecName: Full=ABA-inducible protein PHV A1;	A0A452ZQB3_AEGTS SubName: Full=Uncharacterized protein {ECO:0000313|EnsemblPlants:AET1Gv20878900.14};	--	--	Late embryogenesis abundant protein	--	--	--
Cluster-120167.27	18.02	20.23	14.77	568.18	601.84	551.73	335	412	270	10000	12407	9560	5.03935	0	0	up	1050	--	--	unnamed protein product [Triticum turgidum subsp. durum]	LEA1_HORVU RecName: Full=ABA-inducible protein PHV A1;	A0A446K900_TRITD SubName: Full=Uncharacterized protein {ECO:0000313|EMBL:VAH21812.1};	--	--	Late embryogenesis abundant protein	--	--	--
Cluster-120167.28	22.68	26.02	22.94	613.72	598.58	606.28	101	121	100	2469	2838	2346	4.63655	0	0	up	519	--	--	unnamed protein product [Triticum turgidum subsp. durum]	LEA1_HORVU RecName: Full=ABA-inducible protein PHV A1;	A0A446K900_TRITD SubName: Full=Uncharacterized protein {ECO:0000313|EMBL:VAH21812.1};	--	--	Late embryogenesis abundant protein	--	--	--
Cluster-120167.29	31.71	27.4	27.58	705.25	727.96	704.08	231	208	198	4709	5688	4550	4.61465	0	0	up	608	--	--	late embryogenesis abundant protein 3 [Eremopyrum triticeum]	LEA1_HORVU RecName: Full=ABA-inducible protein PHV A1;	M8BA57_AEGTA SubName: Full=Uncharacterized protein {ECO:0000313|EMBL:EMT10535.1, ECO:0000313|EnsemblPlants:EMT10535};	--	--	Late embryogenesis abundant protein	--	--	--
Cluster-120608.4	50.17	49.64	48.37	333.89	314.46	330.4	2062	2243	1952	13026	14375	12750	2.75028	0	0	up	1946	K00122 formate dehydrogenase [EC:1.17.1.9] | (RefSeq) formate dehydrogenase, mitochondrial (A)	ko00630: Glyoxylate and dicarboxylate metabolism; ko01100: Metabolic pathways; ko01200: Carbon metabolism	formate dehydrogenase, mitochondrial [Hordeum vulgare subsp. vulgare]	FDH_HORVU RecName: Full=Formate dehydrogenase, mitochondrial {ECO:0000255|HAMAP-Rule:MF_03210, ECO:0000303|PubMed:9489019}; Short=FDH {ECO:0000255|HAMAP-Rule:MF_03210}; EC=1.17.1.9 {ECO:0000255|HAMAP-Rule:MF_03210}; AltName: Full=NAD-dependent formate dehydrogenase {ECO:0000255|HAMAP-Rule:MF_03210}; Flags: Precursor;	F2CWR0_HORVV RecName: Full=Formate dehydrogenase, mitochondrial {ECO:0000256|HAMAP-Rule:MF_03210}; Short=FDH {ECO:0000256|HAMAP-Rule:MF_03210}; EC=1.17.1.9 {ECO:0000256|HAMAP-Rule:MF_03210}; AltName: Full=NAD-dependent formate dehydrogenase {ECO:0000256|HAMAP-Rule:MF_03210};	Glyoxylate/hydroxypyruvate reductase (D-isomer-specific 2-hydroxy acid dehydrogenase superfamily)	GO:0009326,formate dehydrogenase complex; GO:0005739,mitochondrion; GO:0008863,formate dehydrogenase (NAD+) activity; GO:0051287,NAD binding; GO:0016616,oxidoreductase activity, acting on the CH-OH group of donors, NAD or NADP as acceptor; GO:0042183,formate catabolic process; GO:0003674,molecular_function; GO:0003824,catalytic activity; GO:0016491,oxidoreductase activity; GO:0016620,oxidoreducta…	D-isomer specific 2-hydroxyacid dehydrogenase, NAD binding domain	--	--	--
Cluster-121118.0	1.37	1.11	0.9	27.26	27.37	26.45	96	85	62	1824	2147	1754	4.62239	0	0	up	3115	K08235 xyloglucan:xyloglucosyl transferase [EC:2.4.1.207] | (RefSeq) xyloglucan endotransglucosylase/hydrolase protein 24-like (A)	--	xyloglucan endotransglucosylase/hydrolase protein 24-like [Triticum dicoccoides]	XTH7_DIOKA RecName: Full=Xyloglucan endotransglucosylase protein 7 {ECO:0000305}; Short=XET protein 7 {ECO:0000305}; EC=2.4.1.207 {ECO:0000255|RuleBase:RU361120, ECO:0000269|PubMed:27242828}; AltName: Full=DkXTH7 {ECO:0000303|PubMed:27242828}; AltName: Full=Xyloglucan endotransglucosylase/hydrolase protein 7 {ECO:0000305}; Short=XTH protein 7 {ECO:0000305};	A0A446LEP3_TRITD RecName: Full=Xyloglucan endotransglucosylase/hydrolase {ECO:0000256|RuleBase:RU361120}; EC=2.4.1.207 {ECO:0000256|RuleBase:RU361120};	--	GO:0048046,apoplast; GO:0005737,cytoplasm; GO:0004553,hydrolase activity, hydrolyzing O-glycosyl compounds; GO:0016762,xyloglucan:xyloglucosyl transferase activity; GO:0070726,cell wall assembly; GO:0009835,fruit ripening; GO:0010411,xyloglucan metabolic process; GO:0003674,molecular_function; GO:0003824,catalytic activity; GO:0016787,hydrolase activity; GO:0016798,hydrolase activity, acting on g…	Glycosyl hydrolases family 16	--	--	--
Cluster-121118.6	38.96	37.63	31.54	896.07	918.92	899.68	862	912	685	18748	22522	18558	4.66986	0	0	up	1189	K08235 xyloglucan:xyloglucosyl transferase [EC:2.4.1.207] | (RefSeq) putative xyloglucan endotransglucosylase/hydrolase protein 13 (A)	--	hypothetical protein CFC21_018700 [Triticum aestivum]	XTH13_ARATH RecName: Full=Putative xyloglucan endotransglucosylase/hydrolase protein 13; Short=At-XTH13; Short=XTH-13; EC=2.4.1.207; Flags: Precursor;	A0A446LEM0_TRITD RecName: Full=Xyloglucan endotransglucosylase/hydrolase {ECO:0000256|RuleBase:RU361120}; EC=2.4.1.207 {ECO:0000256|RuleBase:RU361120};	--	GO:0048046,apoplast; GO:0004553,hydrolase activity, hydrolyzing O-glycosyl compounds; GO:0030247,polysaccharide binding; GO:0016762,xyloglucan:xyloglucosyl transferase activity; GO:0042546,cell wall biogenesis; GO:0071555,cell wall organization; GO:0010411,xyloglucan metabolic process; GO:0003674,molecular_function; GO:0003824,catalytic activity; GO:0016787,hydrolase activity; GO:0016798,hydrolas…	Glycosyl hydrolases family 16	--	--	--
Cluster-121878.0	8.91	9.75	11.55	404.32	395.48	394.85	288	351	371	12435	14248	12007	5.32534	0	0	up	1668	--	--	late embryogenesis abundant protein At3g53040 [Aegilops tauschii subsp. strangulata]	CR1_HORVU RecName: Full=Cold-regulated protein 1; Flags: Fragment;	A0A453CRZ1_AEGTS SubName: Full=Uncharacterized protein {ECO:0000313|EnsemblPlants:AET2Gv20944900.3};	--	--	Late embryogenesis abundant protein	--	--	--
Cluster-122132.1	21.25	21.25	23.06	76.09	77.18	76.89	848	929	899	2864	3411	2872	1.83772	0	0	up	2406	K01255 leucyl aminopeptidase [EC:3.4.11.1] | (RefSeq) leucine aminopeptidase 2, chloroplastic-like isoform X1 (A)	ko00480: Glutathione metabolism; ko01100: Metabolic pathways	leucine aminopeptidase 2, chloroplastic isoform X2 [Aegilops tauschii subsp. strangulata]	AMPL2_ORYSJ RecName: Full=Leucine aminopeptidase 2, chloroplastic; EC=3.4.11.1; AltName: Full=Leucyl aminopeptidase 2; Short=LAP 2; AltName: Full=Proline aminopeptidase 2; EC=3.4.11.5; AltName: Full=Prolyl aminopeptidase 2; Flags: Precursor;	A0A3B5ZRZ6_WHEAT RecName: Full=CYTOSOL_AP domain-containing protein {ECO:0000259|PROSITE:PS00631};	Predicted aminopeptidase of the M17 family	GO:0009507,chloroplast; GO:0005737,cytoplasm; GO:0030145,manganese ion binding; GO:0070006,metalloaminopeptidase activity; GO:0008233,peptidase activity; GO:0006508,proteolysis; GO:0003674,molecular_function; GO:0005488,binding; GO:0043167,ion binding; GO:0043169,cation binding; GO:0046872,metal ion binding; GO:0046914,transition metal ion binding; GO:0003824,catalytic activity; GO:0004177,aminop…	Cytosol aminopeptidase family, catalytic domain	--	--	--
Cluster-122674.6	15.73	14.84	15.57	112.33	111.29	117.73	1846	1920	1794	12551	14573	13045	2.9192	0	0	up	4989	--	--	uncharacterized protein LOC123098050 [Triticum aestivum]	--	A0A3B6JMJ1_WHEAT RecName: Full=EF-hand domain-containing protein {ECO:0000259|PROSITE:PS50222};	--	GO:0005509,calcium ion binding; GO:0003674,molecular_function; GO:0005488,binding; GO:0043167,ion binding; GO:0043169,cation binding; GO:0046872,metal ion binding	Bone sialoprotein II (BSP-II)	--	--	--
Cluster-122719.1	13.6	13.68	14.98	70.62	67.51	65.95	672	705	678	3151	3518	2926	2.28819	0	0	up	3330	K01904 4-coumarate--CoA ligase [EC:6.2.1.12] | (RefSeq) 4-coumarate--CoA ligase-like 1 (A)	ko00130: Ubiquinone and other terpenoid-quinone biosynthesis; ko00940: Phenylpropanoid biosynthesis; ko01100: Metabolic pathways; ko01110: Biosynthesis of secondary metabolites	predicted protein, partial [Hordeum vulgare subsp. vulgare]	4CLL1_ORYSJ RecName: Full=4-coumarate--CoA ligase-like 1; EC=6.2.1.-;	F2D0T4_HORVV SubName: Full=Predicted protein {ECO:0000313|EMBL:BAJ88705.1}; Flags: Fragment;	Acyl-CoA synthetase	GO:0016207,4-coumarate-CoA ligase activity; GO:0005524,ATP binding; GO:0016405,CoA-ligase activity; GO:0106290,trans-cinnamate-CoA ligase activity; GO:0009698,phenylpropanoid metabolic process; GO:0003674,molecular_function; GO:0003824,catalytic activity; GO:0016874,ligase activity; GO:0016877,ligase activity, forming carbon-sulfur bonds; GO:0016878,acid-thiol ligase activity; GO:0000166,nucleoti…	AMP-binding enzyme	--	--	--
Cluster-122765.11	46.22	49.94	48.9	464.83	441.07	473.91	728	859	757	6876	7643	6902	3.2614	0	0	up	935	K12657 delta-1-pyrroline-5-carboxylate synthetase [EC:2.7.2.11 1.2.1.41] | (RefSeq) delta-1-pyrroline-5-carboxylate synthase 2 (A)	ko00330: Arginine and proline metabolism; ko01100: Metabolic pathways; ko01110: Biosynthesis of secondary metabolites; ko01230: Biosynthesis of amino acids	unnamed protein product [Triticum turgidum subsp. durum]	P5CS2_ORYSJ RecName: Full=Delta-1-pyrroline-5-carboxylate synthase 2 {ECO:0000305}; Short=OsP5CS2 {ECO:0000303|Ref.7}; Includes: RecName: Full=Glutamate 5-kinase; Short=GK; EC=2.7.2.11; AltName: Full=Gamma-glutamyl kinase; Includes: RecName: Full=Gamma-glutamyl phosphate reductase; Short=GPR; EC=1.2.1.41; AltName: Full=Glutamate-5-semialdehyde dehydrogenase; AltName: Full=Glutamyl-gamma-semialdeh…	A0A453FXE5_AEGTS SubName: Full=Uncharacterized protein {ECO:0000313|EnsemblPlants:AET3Gv20817600.28};	Gamma-glutamyl phosphate reductase	GO:0005737,cytoplasm; GO:0005524,ATP binding; GO:0004349,glutamate 5-kinase activity; GO:0004350,glutamate-5-semialdehyde dehydrogenase activity; GO:0055129,L-proline biosynthetic process; GO:0016310,phosphorylation; GO:0006561,proline biosynthetic process; GO:0000166,nucleotide binding; GO:0003674,molecular_function; GO:0005488,binding; GO:0017076,purine nucleotide binding; GO:0030554,adenyl nuc…	Aldehyde dehydrogenase family	--	--	--
Cluster-122765.5	26.34	27.57	29.61	334.13	329.29	321.08	1450	1670	1601	17483	20191	16635	3.58903	0	0	up	2503	K12657 delta-1-pyrroline-5-carboxylate synthetase [EC:2.7.2.11 1.2.1.41] | (RefSeq) delta-1-pyrroline-5-carboxylate synthase 2 (A)	ko00330: Arginine and proline metabolism; ko01100: Metabolic pathways; ko01110: Biosynthesis of secondary metabolites; ko01230: Biosynthesis of amino acids	delta-1-pyrroline-5-carboxylate synthase 2 [Triticum aestivum]	P5CS2_ORYSJ RecName: Full=Delta-1-pyrroline-5-carboxylate synthase 2 {ECO:0000305}; Short=OsP5CS2 {ECO:0000303|Ref.7}; Includes: RecName: Full=Glutamate 5-kinase; Short=GK; EC=2.7.2.11; AltName: Full=Gamma-glutamyl kinase; Includes: RecName: Full=Gamma-glutamyl phosphate reductase; Short=GPR; EC=1.2.1.41; AltName: Full=Glutamate-5-semialdehyde dehydrogenase; AltName: Full=Glutamyl-gamma-semialdeh…	A0A446NW93_TRITD RecName: Full=Delta-1-pyrroline-5-carboxylate synthase {ECO:0000256|PIRNR:PIRNR036429}; Includes: RecName: Full=Glutamate 5-kinase {ECO:0000256|PIRNR:PIRNR036429}; Short=GK {ECO:0000256|PIRNR:PIRNR036429}; EC=2.7.2.11 {ECO:0000256|PIRNR:PIRNR036429}; AltName: Full=Gamma-glutamyl kinase {ECO:0000256|PIRNR:PIRNR036429}; Includes: RecName: Full=Gamma-glutamyl phosphate reductase {EC…	Gamma-glutamyl phosphate reductase	GO:0005737,cytoplasm; GO:0005524,ATP binding; GO:0004349,glutamate 5-kinase activity; GO:0004350,glutamate-5-semialdehyde dehydrogenase activity; GO:0055129,L-proline biosynthetic process; GO:0016310,phosphorylation; GO:0006561,proline biosynthetic process; GO:0000166,nucleotide binding; GO:0003674,molecular_function; GO:0005488,binding; GO:0017076,purine nucleotide binding; GO:0030554,adenyl nuc…	Amino acid kinase family	--	--	--
Cluster-123011.1	20.57	20.15	22.22	71.48	71.4	68.31	1130	1218	1199	3731	4368	3530	1.77636	0	0	up	2498	K14207 solute carrier family 38 (sodium-coupled neutral amino acid transporter), member 2 | (RefSeq) amino acid transporter AVT6A-like (A)	--	amino acid transporter AVT6A-like [Triticum dicoccoides]	AVT6A_ARATH RecName: Full=Amino acid transporter AVT6A {ECO:0000305}; Short=AtAvt6A {ECO:0000303|PubMed:27925655};	A0A446W954_TRITD RecName: Full=Aa_trans domain-containing protein {ECO:0000259|Pfam:PF01490};	Amino acid transporter protein	GO:0016021,integral component of membrane; GO:0000325,plant-type vacuole; GO:0015179,L-amino acid transmembrane transporter activity; GO:0003333,amino acid transmembrane transport; GO:0003674,molecular_function; GO:0005215,transporter activity; GO:0005342,organic acid transmembrane transporter activity; GO:0015171,amino acid transmembrane transporter activity; GO:0022857,transmembrane transporter…	Transmembrane amino acid transporter protein	--	--	--
Cluster-123740.4	14.04	13.06	13.45	59.87	60.57	59.68	514	525	484	2080	2467	2051	2.17919	0	0	up	1768	K07213 copper chaperone | (RefSeq) hypothetical protein (A)	--	heavy metal-associated isoprenylated plant protein 35-like [Triticum dicoccoides]	HIP36_ARATH RecName: Full=Heavy metal-associated isoprenylated plant protein 36 {ECO:0000303|PubMed:21072340, ECO:0000303|PubMed:23368984}; Short=AtHIP36 {ECO:0000303|PubMed:21072340, ECO:0000303|PubMed:23368984}; Flags: Precursor;	A0A3B6ETE2_WHEAT RecName: Full=HMA domain-containing protein {ECO:0000259|PROSITE:PS50846};	Copper chaperone	GO:0046872,metal ion binding; GO:0003674,molecular_function; GO:0005488,binding; GO:0043167,ion binding; GO:0043169,cation binding	Heavy-metal-associated domain	--	--	--
Cluster-124582.7	2.52	3.25	2.65	35.58	35.71	35.32	118	168	122	1597	1878	1569	3.69508	0	0	up	2192	K05909 laccase [EC:1.10.3.2] | (RefSeq) putative laccase-9 (A)	--	unnamed protein product [Triticum turgidum subsp. durum]	LAC9_ORYSJ RecName: Full=Putative laccase-9; EC=1.10.3.2; AltName: Full=Benzenediol:oxygen oxidoreductase 9; AltName: Full=Diphenol oxidase 9; AltName: Full=Urishiol oxidase 9; Flags: Precursor;	A0A446VN58_TRITD RecName: Full=Laccase {ECO:0000256|ARBA:ARBA00012297, ECO:0000256|RuleBase:RU361119}; EC=1.10.3.2 {ECO:0000256|ARBA:ARBA00012297, ECO:0000256|RuleBase:RU361119}; AltName: Full=Benzenediol:oxygen oxidoreductase {ECO:0000256|RuleBase:RU361119}; AltName: Full=Diphenol oxidase {ECO:0000256|RuleBase:RU361119}; AltName: Full=Urishiol oxidase {ECO:0000256|RuleBase:RU361119};	Multicopper oxidases	GO:0048046,apoplast; GO:0005507,copper ion binding; GO:0052716,hydroquinone:oxygen oxidoreductase activity; GO:0016491,oxidoreductase activity; GO:0046274,lignin catabolic process; GO:0003674,molecular_function; GO:0005488,binding; GO:0043167,ion binding; GO:0043169,cation binding; GO:0046872,metal ion binding; GO:0046914,transition metal ion binding; GO:0003824,catalytic activity; GO:0016679,oxi…	Multicopper oxidase	--	--	--
Cluster-124647.1	52.99	52.58	50.35	172.66	176.14	178.55	2023	2143	1839	6257	7366	6334	1.79838	0	0	up	1966	K01489 cytidine deaminase [EC:3.5.4.5] | (RefSeq) cytidine deaminase 1-like (A)	ko00240: Pyrimidine metabolism; ko01100: Metabolic pathways; ko01232: Nucleotide metabolism	cytidine deaminase 1-like [Triticum dicoccoides]	CDA1_ARATH RecName: Full=Cytidine deaminase 1 {ECO:0000303|PubMed:10024464, ECO:0000303|PubMed:10469156}; Short=At-CDA1 {ECO:0000303|PubMed:10024464, ECO:0000303|PubMed:10469156}; EC=3.5.4.5 {ECO:0000269|PubMed:10024464, ECO:0000269|PubMed:10469156, ECO:0000269|Ref.3};	A0A077RYU3_WHEAT RecName: Full=Cytidine deaminase {ECO:0000256|ARBA:ARBA00012783}; EC=3.5.4.5 {ECO:0000256|ARBA:ARBA00012783};	Cytidine deaminase	GO:0005829,cytosol; GO:0005739,mitochondrion; GO:0004126,cytidine deaminase activity; GO:0047844,deoxycytidine deaminase activity; GO:0042803,protein homodimerization activity; GO:0008270,zinc ion binding; GO:0006216,cytidine catabolic process; GO:0009972,cytidine deamination; GO:0003674,molecular_function; GO:0003824,catalytic activity; GO:0016787,hydrolase activity; GO:0016810,hydrolase activit…	Cytidine and deoxycytidylate deaminase zinc-binding region	--	--	--
Cluster-124654.13	28.98	28.95	34.21	266	257.94	251.03	162	183	178	1500	1756	1512	3.25428	0	0	up	680	--	--	non-specific lipid-transfer protein 2-like [Triticum dicoccoides]	NLTPX_ORYSI RecName: Full=Non-specific lipid-transfer protein 2; Short=nsLTP2; AltName: Full=7 kDa lipid transfer protein; Flags: Precursor;	A0A452ZSI1_AEGTS RecName: Full=AAI domain-containing protein {ECO:0000259|SMART:SM00499};	--	GO:0008289,lipid binding; GO:0006869,lipid transport; GO:0003674,molecular_function; GO:0005488,binding; GO:0006810,transport; GO:0008150,biological_process; GO:0010876,lipid localization; GO:0033036,macromolecule localization; GO:0051179,localization; GO:0051234,establishment of localization; GO:0071702,organic substance transport	Protease inhibitor/seed storage/LTP family	--	--	--
Cluster-124666.1	29.61	30.12	30.42	120.32	126.27	126.11	1502	1680	1515	5798	7130	6016	2.07653	0	0	up	2330	--	--	uncharacterized protein LOC119362815 [Triticum dicoccoides]	--	A0A3B6C1U7_WHEAT SubName: Full=Uncharacterized protein {ECO:0000313|EnsemblPlants:TraesCS2B02G174500.1.cds1};	--	--	WD40-like Beta Propeller Repeat	--	--	--
Cluster-124797.0	9.93	9.07	9.56	115.05	116.74	116.95	606	609	574	6675	7937	6722	3.64035	0	0	up	2835	K09338 homeobox-leucine zipper protein | (RefSeq) homeobox-leucine zipper protein HOX6 (A)	--	homeobox-leucine zipper protein HOX22-like [Triticum aestivum]	HOX22_ORYSI RecName: Full=Homeobox-leucine zipper protein HOX22; AltName: Full=HD-ZIP protein HOX22; AltName: Full=Homeodomain transcription factor HOX22; AltName: Full=OsHox22;	A0A3B6CAG0_WHEAT RecName: Full=Homeobox domain-containing protein {ECO:0000259|PROSITE:PS50071};	Transcription factor HEX, contains HOX and HALZ domains	GO:0005634,nucleus; GO:0000981,DNA-binding transcription factor activity, RNA polymerase II-specific; GO:0043565,sequence-specific DNA binding; GO:0003674,molecular_function; GO:0003700,DNA-binding transcription factor activity; GO:0140110,transcription regulator activity; GO:0003676,nucleic acid binding; GO:0003677,DNA binding; GO:0005488,binding; GO:0097159,organic cyclic compound binding; GO:1…	Homeodomain	HB-HD-ZIP	TF	HB->HB-HD-ZIP
Cluster-125182.1	115.39	120.77	110.1	545.16	552.95	559.2	3652	4197	3422	16357	19438	16577	2.28347	0	0	up	1569	K01761 methionine-gamma-lyase [EC:4.4.1.11] | (RefSeq) methionine gamma-lyase-like (A)	ko00270: Cysteine and methionine metabolism; ko00450: Selenocompound metabolism; ko01100: Metabolic pathways	methionine gamma-lyase-like [Triticum aestivum]	MGL_ARATH RecName: Full=Methionine gamma-lyase; Short=AtMGL; EC=4.4.1.11; AltName: Full=L-methioninase;	A0A3B5ZTA5_WHEAT SubName: Full=Uncharacterized protein {ECO:0000313|EnsemblPlants:TraesCS1D02G184500.1};	Cystathionine beta-lyases/cystathionine gamma-synthases	GO:0005737,cytoplasm; GO:0005829,cytosol; GO:0016846,carbon-sulfur lyase activity; GO:0004123,cystathionine gamma-lyase activity; GO:0018826,methionine gamma-lyase activity; GO:0030170,pyridoxal phosphate binding; GO:0009970,cellular response to sulfate starvation; GO:0042631,cellular response to water deprivation; GO:0019343,cysteine biosynthetic process via cystathionine; GO:0019458,methionine …	Cys/Met metabolism PLP-dependent enzyme	--	--	--
Cluster-125213.1	21.58	17.81	18.07	151.73	157.5	154.96	326	338	306	2487	2968	2496	3.09973	0	0	up	1000	--	--	NAC domain-containing protein 48 [Aegilops tauschii subsp. strangulata]	NAC48_ORYSJ RecName: Full=NAC domain-containing protein 48 {ECO:0000303|PubMed:15029955}; Short=ONAC048 {ECO:0000303|PubMed:15029955}; AltName: Full=OsNAC6 {ECO:0000303|PubMed:10660065}; AltName: Full=Protein STRESS-RESPONSIVE NAC 2 {ECO:0000303|PubMed:18273684};	A0A452Z5M8_AEGTS RecName: Full=NAC domain-containing protein {ECO:0000259|PROSITE:PS51005};	--	GO:0005634,nucleus; GO:0043565,sequence-specific DNA binding; GO:1901002,positive regulation of response to salt stress; GO:1902584,positive regulation of response to water deprivation; GO:0045893,positive regulation of DNA-templated transcription; GO:1900150,regulation of defense response to fungus; GO:0040008,regulation of growth; GO:0009409,response to cold; GO:0048364,root development; GO:000…	--	--	--	--
Cluster-125329.16	19.8	22.42	23.81	146.78	144.87	140.34	966	1206	1141	6811	7880	6443	2.7392	0	0	up	2855	K15015 solute carrier family 32 (vesicular inhibitory amino acid transporter) | (RefSeq) amino acid transporter AVT1A-like (A)	--	unnamed protein product [Triticum turgidum subsp. durum]	AVT1A_ARATH RecName: Full=Amino acid transporter AVT1A {ECO:0000305}; Short=AtAvt1A {ECO:0000303|PubMed:27925655};	J7RD14_HORVU SubName: Full=Putative aromatic and neutral amino acid transporter {ECO:0000313|EMBL:CCJ47123.1}; Flags: Fragment;	Amino acid transporters	GO:0016021,integral component of membrane; GO:0016020,membrane; GO:0000325,plant-type vacuole; GO:0015171,amino acid transmembrane transporter activity; GO:0003333,amino acid transmembrane transport; GO:0003674,molecular_function; GO:0005215,transporter activity; GO:0005342,organic acid transmembrane transporter activity; GO:0022857,transmembrane transporter activity; GO:0046943,carboxylic acid t…	Transmembrane amino acid transporter protein	--	--	--
Cluster-125596.5	2.5	3.7	3.2	109.01	110.94	113.53	128	208	161	5300	6320	5464	5.17185	0	0	up	2348	K03798 cell division protease FtsH [EC:3.4.24.-] | (RefSeq) ATP-dependent zinc metalloprotease FTSH 6, chloroplastic-like (A)	--	ATP-dependent zinc metalloprotease FTSH 6, chloroplastic-like [Triticum aestivum]	FTSH6_ORYSJ RecName: Full=ATP-dependent zinc metalloprotease FTSH 6, chloroplastic; Short=OsFTSH6; EC=3.4.24.-; Flags: Precursor;	A0A3B6TC12_WHEAT RecName: Full=AAA domain-containing protein {ECO:0000259|SMART:SM00382};	AAA+-type ATPase containing the peptidase M41 domain	GO:0009534,chloroplast thylakoid; GO:0009535,chloroplast thylakoid membrane; GO:0016021,integral component of membrane; GO:0005524,ATP binding; GO:0016887,ATP hydrolysis activity; GO:0004176,ATP-dependent peptidase activity; GO:0046872,metal ion binding; GO:0004222,metalloendopeptidase activity; GO:0006508,proteolysis; GO:0000166,nucleotide binding; GO:0003674,molecular_function; GO:0005488,bindi…	Peptidase family M41	--	--	--
Cluster-125935.3	7.88	8.62	10.26	72.47	70.41	70.1	409	493	524	3580	4076	3428	3.02391	0	0	up	2381	K24917 amino acid permease | (RefSeq) probable amino acid permease 7 isoform X1 (A)	--	probable amino acid permease 7 isoform X1 [Hordeum vulgare subsp. vulgare]	AAP7_ARATH RecName: Full=Probable amino acid permease 7; AltName: Full=Amino acid transporter AAP7;	F2DMT2_HORVV SubName: Full=Predicted protein {ECO:0000313|EMBL:BAJ96403.1};	Amino acid transporters	GO:0016021,integral component of membrane; GO:0016020,membrane; GO:0005886,plasma membrane; GO:0015293,symporter activity; GO:0006865,amino acid transport; GO:0003674,molecular_function; GO:0005215,transporter activity; GO:0015291,secondary active transmembrane transporter activity; GO:0022804,active transmembrane transporter activity; GO:0022857,transmembrane transporter activity; GO:0006810,tra…	Transmembrane amino acid transporter protein	--	--	--
Cluster-126780.10	19.31	18.21	19.7	275.62	278.34	267.34	232	237	232	3108	3678	2952	3.85951	0	0	up	792	K17290 oxidoreductase [EC:1.1.1.-] | (RefSeq) Oxidoreductase HTATIP2 (A)	--	predicted protein, partial [Hordeum vulgare subsp. vulgare]	ELI5_HORVU RecName: Full=High molecular mass early light-inducible protein HV58, chloroplastic; Short=ELIP; Flags: Precursor;	F2DS98_HORVV SubName: Full=Predicted protein {ECO:0000313|EMBL:BAJ97969.1}; Flags: Fragment;	--	GO:0031969,chloroplast membrane; GO:0016021,integral component of membrane; GO:0005575,cellular_component; GO:0005622,intracellular anatomical structure; GO:0005737,cytoplasm; GO:0009507,chloroplast; GO:0009526,plastid envelope; GO:0009536,plastid; GO:0009941,chloroplast envelope; GO:0016020,membrane; GO:0031090,organelle membrane; GO:0031967,organelle envelope; GO:0031975,envelope; GO:0042170,pl…	Chlorophyll A-B binding protein	--	--	--
Cluster-127818.6	618.39	666.58	596.17	7791.16	7921.02	8262.17	10810	12102	10272	122042	145011	121297	3.6146	0	0	up	1105	--	--	unnamed protein product [Triticum turgidum subsp. durum]	IBBB5_HYAOR RecName: Full=Bowman-Birk type proteinase inhibitor B5 {ECO:0000303|PubMed:33666645}; Short=HOSPI-B5 {ECO:0000303|PubMed:33666645};	A0A446K246_TRITD RecName: Full=BOWMAN_BIRK domain-containing protein {ECO:0000259|SMART:SM00269};	--	GO:0005576,extracellular region; GO:0004867,serine-type endopeptidase inhibitor activity; GO:0010951,negative regulation of endopeptidase activity; GO:0003674,molecular_function; GO:0004857,enzyme inhibitor activity; GO:0004866,endopeptidase inhibitor activity; GO:0030234,enzyme regulator activity; GO:0030414,peptidase inhibitor activity; GO:0061134,peptidase regulator activity; GO:0061135,endope…	--	--	--	--
Cluster-127967.2	11.64	11.8	13.34	93.51	99.6	92.22	551	612	617	4194	5246	4103	2.98869	0	0	up	3251	K00161 pyruvate dehydrogenase E1 component subunit alpha [EC:1.2.4.1] | (RefSeq) pyruvate dehydrogenase E1 component subunit alpha-2, mitochondrial (A)	ko00010: Glycolysis / Gluconeogenesis; ko00020: Citrate cycle (TCA cycle); ko00620: Pyruvate metabolism; ko00785: Lipoic acid metabolism; ko01100: Metabolic pathways; ko01110: Biosynthesis of secondary metabolites; ko01200: Carbon metabolism	pyruvate dehydrogenase E1 component subunit alpha-2, mitochondrial [Aegilops tauschii subsp. strangulata]	ODPA2_ORYSJ RecName: Full=Pyruvate dehydrogenase E1 component subunit alpha-2, mitochondrial; Short=PDHE1-A; EC=1.2.4.1; Flags: Precursor;	A0A453R8H1_AEGTS RecName: Full=Pyruvate dehydrogenase E1 component subunit alpha {ECO:0000256|RuleBase:RU361139}; EC=1.2.4.1 {ECO:0000256|RuleBase:RU361139};	Pyruvate dehydrogenase E1, alpha subunit	GO:0005759,mitochondrial matrix; GO:0004739,pyruvate dehydrogenase (acetyl-transferring) activity; GO:0006086,acetyl-CoA biosynthetic process from pyruvate; GO:0006096,glycolytic process; GO:0003674,molecular_function; GO:0003824,catalytic activity; GO:0004738,pyruvate dehydrogenase activity; GO:0016491,oxidoreductase activity; GO:0016624,oxidoreductase activity, acting on the aldehyde or oxo gro…	Dehydrogenase E1 component	--	--	--
Cluster-128217.2	44.77	40.23	42.59	273.44	283.1	271.21	1111	1099	1042	6451	7828	6302	2.72346	0	0	up	1304	no KO assigned | (RefSeq) glucan endo-1,3-beta-glucosidase-like (A)	--	putative glucan endo-1,3-beta-glucosidase GVI isoform X2 [Triticum aestivum]	E13F_HORVU RecName: Full=Putative glucan endo-1,3-beta-glucosidase GVI; EC=3.2.1.39; AltName: Full=(1->3)-beta-glucan endohydrolase GVI; AltName: Full=(1->3)-beta-glucanase isoenzyme GVI; AltName: Full=Beta-1,3-endoglucanase GVI; Flags: Precursor; Fragment;	A0A446K5L5_TRITD SubName: Full=Uncharacterized protein {ECO:0000313|EMBL:VAH20624.1};	--	GO:0042973,glucan endo-1,3-beta-D-glucosidase activity; GO:0005975,carbohydrate metabolic process; GO:0006952,defense response; GO:0003674,molecular_function; GO:0003824,catalytic activity; GO:0004553,hydrolase activity, hydrolyzing O-glycosyl compounds; GO:0008422,beta-glucosidase activity; GO:0015926,glucosidase activity; GO:0016787,hydrolase activity; GO:0016798,hydrolase activity, acting on g…	Glycosyl hydrolases family 17	--	--	--
Cluster-128311.1	19.78	19.61	13.97	441.94	416.79	434.58	325	307	211	6785	7544	6451	4.69053	0	0	up	1372	K05765 cofilin | (RefSeq) actin-depolymerizing factor 3-like (A)	--	actin-depolymerizing factor 3-like [Triticum dicoccoides]	ADF3_ORYSJ RecName: Full=Actin-depolymerizing factor 3; Short=ADF-3; Short=OsADF3;	B5LQT1_HORVV SubName: Full=Actin depolymerization factor-like protein {ECO:0000313|EMBL:ACH70383.1}; SubName: Full=Adf2 {ECO:0000313|EMBL:ACH69772.1};	Actin depolymerizing factor	GO:0015629,actin cytoskeleton; GO:0005737,cytoplasm; GO:0051015,actin filament binding; GO:0030042,actin filament depolymerization; GO:0003674,molecular_function; GO:0003779,actin binding; GO:0005488,binding; GO:0005515,protein binding; GO:0008092,cytoskeletal protein binding; GO:0044877,protein-containing complex binding; GO:0006996,organelle organization; GO:0007010,cytoskeleton organization; G…	Cofilin/tropomyosin-type actin-binding protein	--	--	--
Cluster-128419.0	11.57	11.56	11.4	301.48	313.89	305.8	303	328	294	7531	9187	7520	4.77542	0	0	up	1465	--	--	hypothetical protein D1007_04052 [Hordeum vulgare]	--	A0A453H9A9_AEGTS SubName: Full=Uncharacterized protein {ECO:0000313|EnsemblPlants:AET4Gv20113100.2};	--	--	--	--	--	--
Cluster-128974.0	93.11	86.1	84.6	468.86	468.81	461.75	1550	1598	1419	7476	8780	7146	2.42085	0	0	up	1184	K01784 UDP-glucose 4-epimerase [EC:5.1.3.2] | (RefSeq) UDP-glucose 4-epimerase 1 (A)	ko00052: Galactose metabolism; ko00520: Amino sugar and nucleotide sugar metabolism; ko01100: Metabolic pathways; ko01250: Biosynthesis of nucleotide sugars	unnamed protein product [Triticum turgidum subsp. durum]	UGE1_ORYSJ RecName: Full=UDP-glucose 4-epimerase 1; Short=OsUGE-1; EC=5.1.3.2; AltName: Full=UDP-galactose 4-epimerase 1;	A0A446KF58_TRITD RecName: Full=UDP-glucose 4-epimerase {ECO:0000256|RuleBase:RU366046}; EC=5.1.3.- {ECO:0000256|RuleBase:RU366046};	UDP-glucose 4-epimerase/UDP-sulfoquinovose synthase	GO:0005829,cytosol; GO:0003723,RNA binding; GO:0003978,UDP-glucose 4-epimerase activity; GO:0006012,galactose metabolic process; GO:0006364,rRNA processing; GO:0003674,molecular_function; GO:0003676,nucleic acid binding; GO:0005488,binding; GO:0097159,organic cyclic compound binding; GO:1901363,heterocyclic compound binding; GO:0003824,catalytic activity; GO:0016853,isomerase activity; GO:0016854…	GDP-mannose 4,6 dehydratase	--	--	--
Cluster-130069.1	86.72	88.37	90.43	289.39	297.37	279.38	2056	2296	2105	6485	7809	6176	1.72764	0	0	up	1252	--	--	hypothetical protein TRIUR3_26766 [Triticum urartu]	SRS1_ORYSI RecName: Full=Salt stress root protein RS1;	M7ZP50_TRIUA SubName: Full=Uncharacterized protein {ECO:0000313|EMBL:EMS54120.1, ECO:0000313|EnsemblPlants:TRIUR3_26766-P1};	--	GO:0046658,anchored component of plasma membrane; GO:0005575,cellular_component; GO:0005886,plasma membrane; GO:0016020,membrane; GO:0031224,intrinsic component of membrane; GO:0031225,anchored component of membrane; GO:0031226,intrinsic component of plasma membrane; GO:0071944,cell periphery; GO:0110165,cellular anatomical entity	DREPP plasma membrane polypeptide	--	--	--
Cluster-130423.0	106.48	106.42	107.19	383.58	381.4	381.75	3004	3294	2969	10247	11943	10077	1.86529	0	0	up	1627	K01915 glutamine synthetase [EC:6.3.1.2] | (RefSeq) glutamine synthetase cytosolic isozyme 1-2 (A)	ko00220: Arginine biosynthesis; ko00250: Alanine, aspartate and glutamate metabolism; ko00630: Glyoxylate and dicarboxylate metabolism; ko00910: Nitrogen metabolism; ko01100: Metabolic pathways; ko01230: Biosynthesis of amino acids	unnamed protein product [Triticum turgidum subsp. durum]	GLNA1_MAIZE RecName: Full=Glutamine synthetase root isozyme 1; EC=6.3.1.2; AltName: Full=GS122; AltName: Full=Glutamate--ammonia ligase;	A0A446SAP1_TRITD RecName: Full=Glutamine synthetase {ECO:0000256|ARBA:ARBA00012937}; EC=6.3.1.2 {ECO:0000256|ARBA:ARBA00012937};	Glutamine synthetase	GO:0005737,cytoplasm; GO:0005524,ATP binding; GO:0004356,glutamate-ammonia ligase activity; GO:0006542,glutamine biosynthetic process; GO:0000166,nucleotide binding; GO:0003674,molecular_function; GO:0005488,binding; GO:0017076,purine nucleotide binding; GO:0030554,adenyl nucleotide binding; GO:0032553,ribonucleotide binding; GO:0032555,purine ribonucleotide binding; GO:0032559,adenyl ribonucleot…	Glutamine synthetase, catalytic domain	--	--	--
Cluster-130642.13	31.45	38.39	42.74	541	551.19	530.03	1546	2076	2064	25269	30169	24505	3.87923	0	0	up	2268	K14085 aldehyde dehydrogenase family 7 member A1 [EC:1.2.1.31 1.2.1.8 1.2.1.3] | (RefSeq) aldehyde dehydrogenase family 7 member A1 (A)	ko00010: Glycolysis / Gluconeogenesis; ko00053: Ascorbate and aldarate metabolism; ko00071: Fatty acid degradation; ko00260: Glycine, serine and threonine metabolism; ko00280: Valine, leucine and isoleucine degradation; ko00310: Lysine degradation; ko00330: Arginine and proline metabolism; ko00340: Histidine metabolism; ko00380: Tryptophan metabolism; ko00410: beta-Alanine metabolism; ko00561: Gl…	predicted protein, partial [Hordeum vulgare subsp. vulgare]	AL7A1_MALDO RecName: Full=Aldehyde dehydrogenase family 7 member A1; EC=1.2.1.3; AltName: Full=Antiquitin-1; AltName: Full=Matured fruit 60 kDa protein; Short=MF-60;	A0A453KUC9_AEGTS RecName: Full=Aldehyde dehydrogenase (NAD(+)) {ECO:0000256|ARBA:ARBA00024226}; EC=1.2.1.3 {ECO:0000256|ARBA:ARBA00024226};	Aldehyde dehydrogenase	GO:0004029,aldehyde dehydrogenase (NAD+) activity; GO:0043878,glyceraldehyde-3-phosphate dehydrogenase (NAD+) (non-phosphorylating) activity; GO:0006081,cellular aldehyde metabolic process; GO:0003674,molecular_function; GO:0003824,catalytic activity; GO:0004030,aldehyde dehydrogenase [NAD(P)+] activity; GO:0016491,oxidoreductase activity; GO:0016620,oxidoreductase activity, acting on the aldehyd…	Aldehyde dehydrogenase family	--	--	--
Cluster-130642.15	37.53	42.26	45.89	732.49	677.41	616.23	192	232	231	3462	3743	2805	3.99771	0	0	up	510	K14085 aldehyde dehydrogenase family 7 member A1 [EC:1.2.1.31 1.2.1.8 1.2.1.3] | (RefSeq) aldehyde dehydrogenase family 7 member A1 (A)	ko00010: Glycolysis / Gluconeogenesis; ko00053: Ascorbate and aldarate metabolism; ko00071: Fatty acid degradation; ko00260: Glycine, serine and threonine metabolism; ko00280: Valine, leucine and isoleucine degradation; ko00310: Lysine degradation; ko00330: Arginine and proline metabolism; ko00340: Histidine metabolism; ko00380: Tryptophan metabolism; ko00410: beta-Alanine metabolism; ko00561: Gl…	unnamed protein product [Triticum turgidum subsp. durum]	AL7A1_MALDO RecName: Full=Aldehyde dehydrogenase family 7 member A1; EC=1.2.1.3; AltName: Full=Antiquitin-1; AltName: Full=Matured fruit 60 kDa protein; Short=MF-60;	A0A453KUD3_AEGTS RecName: Full=Aldedh domain-containing protein {ECO:0000259|Pfam:PF00171};	Aldehyde dehydrogenase	GO:0004029,aldehyde dehydrogenase (NAD+) activity; GO:0043878,glyceraldehyde-3-phosphate dehydrogenase (NAD+) (non-phosphorylating) activity; GO:0006081,cellular aldehyde metabolic process; GO:0003674,molecular_function; GO:0003824,catalytic activity; GO:0004030,aldehyde dehydrogenase [NAD(P)+] activity; GO:0016491,oxidoreductase activity; GO:0016620,oxidoreductase activity, acting on the aldehyd…	--	--	--	--
Cluster-130714.2	13.38	12.89	12.07	51.15	52.5	50.1	1113	1180	985	4047	4869	3929	2.03401	0	0	up	3625	--	--	protein ARABIDILLO 1-like [Triticum urartu]	ADLO1_ARATH RecName: Full=Protein ARABIDILLO 1; AltName: Full=F-box only protein 5;	A0A446IZR4_TRITD RecName: Full=F-box domain-containing protein {ECO:0000259|SMART:SM00256};	--	GO:0005634,nucleus; GO:0048527,lateral root development; GO:0007275,multicellular organism development; GO:0008150,biological_process; GO:0009791,post-embryonic development; GO:0022622,root system development; GO:0032501,multicellular organismal process; GO:0032502,developmental process; GO:0048364,root development; GO:0048528,post-embryonic root development; GO:0048731,system development; GO:004…	Armadillo/beta-catenin-like repeat	--	--	--
Cluster-131641.4	60.25	62.24	63.53	225.1	229.48	223.88	5045	5740	5224	17932	21425	17676	1.89756	0	0	up	3647	K01681 aconitate hydratase [EC:4.2.1.3] | (RefSeq) putative aconitate hydratase, cytoplasmic (A)	ko00020: Citrate cycle (TCA cycle); ko00630: Glyoxylate and dicarboxylate metabolism; ko01100: Metabolic pathways; ko01110: Biosynthesis of secondary metabolites; ko01200: Carbon metabolism; ko01210: 2-Oxocarboxylic acid metabolism; ko01230: Biosynthesis of amino acids	LOW QUALITY PROTEIN: putative aconitate hydratase, cytoplasmic [Aegilops tauschii subsp. strangulata]	ACO3M_ARATH RecName: Full=Aconitate hydratase 3, mitochondrial {ECO:0000303|PubMed:25061985}; Short=Aconitase 3 {ECO:0000303|PubMed:25061985}; Short=mACO1 {ECO:0000303|PubMed:24296071}; EC=4.2.1.3 {ECO:0000250|UniProtKB:P19414}; AltName: Full=Citrate hydro-lyase 3 {ECO:0000303|PubMed:25061985}; Flags: Precursor;	A0A8I6XKV8_HORVV RecName: Full=Aconitate hydratase {ECO:0000256|RuleBase:RU361275}; Short=Aconitase {ECO:0000256|RuleBase:RU361275}; EC=4.2.1.3 {ECO:0000256|RuleBase:RU361275};	RNA-binding translational regulator IRP (aconitase superfamily)	GO:0009507,chloroplast; GO:0009570,chloroplast stroma; GO:0005737,cytoplasm; GO:0005829,cytosol; GO:0005739,mitochondrion; GO:0009505,plant-type cell wall; GO:0000325,plant-type vacuole; GO:0051539,4 iron, 4 sulfur cluster binding; GO:0003994,aconitate hydratase activity; GO:0005524,ATP binding; GO:0047780,citrate dehydratase activity; GO:0005507,copper ion binding; GO:0030350,iron-responsive ele…	Aconitase family (aconitate hydratase)	--	--	--
Cluster-131847.5	25.49	27.29	27.63	106.76	110.91	100.48	1063	1251	1133	4224	5139	3930	2.00982	0	0	up	2282	K07936 GTP-binding nuclear protein Ran | (RefSeq) GTP-binding nuclear protein Ran1B (A)	ko03008: Ribosome biogenesis in eukaryotes; ko03013: Nucleocytoplasmic transport; ko03250: Viral life cycle - HIV-1	protein ANTAGONIST OF LIKE HETEROCHROMATIN PROTEIN 1 [Aegilops tauschii subsp. strangulata]	ALP1_ARATH RecName: Full=Protein ANTAGONIST OF LIKE HETEROCHROMATIN PROTEIN 1 {ECO:0000303|PubMed:26642436}; EC=3.1.-.-;	A0A453EYZ9_AEGTS RecName: Full=DDE Tnp4 domain-containing protein {ECO:0000259|Pfam:PF13359};	Predicted transposase	GO:0035098,ESC/E(Z) complex; GO:0005634,nucleus; GO:0035102,PRC1 complex; GO:0003682,chromatin binding; GO:0046872,metal ion binding; GO:0004518,nuclease activity; GO:0040029,epigenetic regulation of gene expression; GO:0003674,molecular_function; GO:0005488,binding; GO:0043167,ion binding; GO:0043169,cation binding; GO:0003824,catalytic activity; GO:0016787,hydrolase activity; GO:0016788,hydrola…	DDE superfamily endonuclease	--	--	--
Cluster-131948.3	21.29	20.81	21.47	63.07	64.37	63.29	1795	1933	1777	5061	6055	5032	1.61675	0	0	up	3907	K25731 VPS35 endosomal protein-sorting factor-like | (RefSeq) UPF0505 protein C16orf62 homolog isoform X1 (A)	--	unnamed protein product [Triticum turgidum subsp. durum]	WRKY6_ARATH RecName: Full=WRKY transcription factor 6 {ECO:0000303|PubMed:11722756}; AltName: Full=WRKY DNA-binding protein 6 {ECO:0000303|PubMed:11722756}; Short=AtWRKY6 {ECO:0000303|PubMed:11722756};	A0A446PMC8_TRITD RecName: Full=WRKY domain-containing protein {ECO:0000259|PROSITE:PS50811};	--	GO:0005634,nucleus; GO:0003700,DNA-binding transcription factor activity; GO:0000976,transcription cis-regulatory region binding; GO:0080169,cellular response to boron-containing substance deprivation; GO:0016036,cellular response to phosphate starvation; GO:0009873,ethylene-activated signaling pathway; GO:0045892,negative regulation of DNA-templated transcription; GO:0003674,molecular_function; …	WRKY DNA -binding domain	WRKY	TF	WRKY
Cluster-132308.0	115.24	115.36	111.31	510.72	526.41	507.76	3376	3709	3202	14176	17119	13920	2.19996	0	0	up	1475	K15382 solute carrier family 50 (sugar transporter) | (RefSeq) bidirectional sugar transporter SWEET15-like (A)	--	bidirectional sugar transporter SWEET15 [Aegilops tauschii subsp. strangulata]	SWT15_ORYSJ RecName: Full=Bidirectional sugar transporter SWEET15; Short=OsSWEET15;	A0A453QYB5_AEGTS RecName: Full=Bidirectional sugar transporter SWEET {ECO:0000256|RuleBase:RU910715};	Multitransmembrane protein	GO:0016021,integral component of membrane; GO:0005887,integral component of plasma membrane; GO:0051119,sugar transmembrane transporter activity; GO:0008643,carbohydrate transport; GO:0003674,molecular_function; GO:0005215,transporter activity; GO:0015144,carbohydrate transmembrane transporter activity; GO:0022857,transmembrane transporter activity; GO:0006810,transport; GO:0008150,biological_pro…	Sugar efflux transporter for intercellular exchange	--	--	--
Cluster-133058.10	161.56	161.33	142.5	834.56	861.37	834.74	4676	5125	4051	22886	27675	22606	2.4662	0	0	up	1461	K10859 DNA oxidative demethylase [EC:1.14.11.33] | (RefSeq) alpha-ketoglutarate-dependent dioxygenase alkB homolog 3-like (A)	--	unnamed protein product [Triticum turgidum subsp. durum]	ENL1_ARATH RecName: Full=Early nodulin-like protein 1; AltName: Full=Phytocyanin-like protein; Flags: Precursor;	A0A446XU33_TRITD RecName: Full=Phytocyanin domain-containing protein {ECO:0000259|PROSITE:PS51485};	--	GO:0031225,anchored component of membrane; GO:0046658,anchored component of plasma membrane; GO:0005886,plasma membrane; GO:0009506,plasmodesma; GO:0099503,secretory vesicle; GO:0005773,vacuole; GO:0009055,electron transfer activity; GO:0003674,molecular_function; GO:0003824,catalytic activity; GO:0016491,oxidoreductase activity; GO:0005575,cellular_component; GO:0016020,membrane; GO:0031224,intr…	Plastocyanin-like domain	--	--	--
Cluster-133429.5	36.31	39.58	39.19	145.46	149.93	138.03	1493	1789	1582	5678	6858	5329	1.94056	0	0	up	1947	--	--	unnamed protein product [Triticum turgidum subsp. durum]	PPH_ARATH RecName: Full=Pheophytinase, chloroplastic; EC=3.1.1.-; AltName: Full=Pheophytin pheophorbide hydrolase; AltName: Full=Protein CO-REGULATED WITH NYE1; Flags: Precursor;	A0A446XKU5_TRITD RecName: Full=AB hydrolase-1 domain-containing protein {ECO:0000259|Pfam:PF12697};	Predicted hydrolase/acyltransferase (alpha/beta hydrolase superfamily)	GO:0009507,chloroplast; GO:0009570,chloroplast stroma; GO:0009535,chloroplast thylakoid membrane; GO:0080124,pheophytinase activity; GO:0015996,chlorophyll catabolic process; GO:0003674,molecular_function; GO:0003824,catalytic activity; GO:0016787,hydrolase activity; GO:0016788,hydrolase activity, acting on ester bonds; GO:0052689,carboxylic ester hydrolase activity; GO:0006725,cellular aromatic …	Alpha/beta hydrolase family	--	--	--
Cluster-133497.0	226.37	238.07	233.89	491.78	489.54	478.7	5980	6898	6067	12299	14343	11817	1.08719	0	0	up	1360	--	--	uncharacterized protein LOC123409773 [Hordeum vulgare subsp. vulgare]	--	A0A8I6YHE7_HORVV SubName: Full=Uncharacterized protein {ECO:0000313|EnsemblPlants:HORVU.MOREX.r3.7HG0721660.1};	--	--	--	--	--	--
Cluster-133730.13	2.82	3.55	3.39	142.75	140.1	139.2	54	72	63	2571	2957	2464	5.46791	0	0	up	1248	K01953 asparagine synthase (glutamine-hydrolysing) [EC:6.3.5.4] | (RefSeq) asparagine synthetase [glutamine-hydrolyzing]-like (A)	ko00250: Alanine, aspartate and glutamate metabolism; ko01100: Metabolic pathways; ko01110: Biosynthesis of secondary metabolites; ko01230: Biosynthesis of amino acids	asparagine synthetase [glutamine-hydrolyzing]	ASNS_ASPOF RecName: Full=Asparagine synthetase [glutamine-hydrolyzing]; Short=AS; EC=6.3.5.4;	A0A453DZU4_AEGTS RecName: Full=Asparagine synthetase [glutamine-hydrolyzing] {ECO:0000256|PIRNR:PIRNR001589}; EC=6.3.5.4 {ECO:0000256|PIRNR:PIRNR001589};	Asparagine synthase (glutamine-hydrolyzing)	GO:0004066,asparagine synthase (glutamine-hydrolyzing) activity; GO:0005524,ATP binding; GO:0006541,glutamine metabolic process; GO:0070981,L-asparagine biosynthetic process; GO:0003674,molecular_function; GO:0003824,catalytic activity; GO:0016874,ligase activity; GO:0016879,ligase activity, forming carbon-nitrogen bonds; GO:0016884,carbon-nitrogen ligase activity, with glutamine as amido-N-donor…	Asparagine synthase	--	--	--
Cluster-133730.14	1.21	1.47	1.35	99.69	97.04	91.05	28	33	29	2000	2278	1802	6.14244	0	0	up	2391	K01953 asparagine synthase (glutamine-hydrolysing) [EC:6.3.5.4] | (RefSeq) asparagine synthetase [glutamine-hydrolyzing]-like (A)	ko00250: Alanine, aspartate and glutamate metabolism; ko01100: Metabolic pathways; ko01110: Biosynthesis of secondary metabolites; ko01230: Biosynthesis of amino acids	hypothetical protein CFC21_033999 [Triticum aestivum]	ASNS_SANAU RecName: Full=Asparagine synthetase [glutamine-hydrolyzing]; EC=6.3.5.4; AltName: Full=Glutamine-dependent asparagine synthetase;	A0A3B6EEF7_WHEAT SubName: Full=Asparagine synthetase-2 {ECO:0000313|EnsemblPlants:TraesCS3A02G077100.2};	Asparagine synthase (glutamine-hydrolyzing)	GO:0004066,asparagine synthase (glutamine-hydrolyzing) activity; GO:0005524,ATP binding; GO:0006541,glutamine metabolic process; GO:0070981,L-asparagine biosynthetic process; GO:0003674,molecular_function; GO:0003824,catalytic activity; GO:0016874,ligase activity; GO:0016879,ligase activity, forming carbon-nitrogen bonds; GO:0016884,carbon-nitrogen ligase activity, with glutamine as amido-N-donor…	--	--	--	--
Cluster-133730.4	66	69.97	72.23	1206.71	1204.02	1156.25	6422	7501	6902	111733	130658	106139	4.1298	0	0	up	4188	K01953 asparagine synthase (glutamine-hydrolysing) [EC:6.3.5.4] | (RefSeq) asparagine synthetase [glutamine-hydrolyzing] (A)	ko00250: Alanine, aspartate and glutamate metabolism; ko01100: Metabolic pathways; ko01110: Biosynthesis of secondary metabolites; ko01230: Biosynthesis of amino acids	asparagine synthetase-1 [Secale cereale]	ASNS_ASPOF RecName: Full=Asparagine synthetase [glutamine-hydrolyzing]; Short=AS; EC=6.3.5.4;	A0A167LAA4_SECCE RecName: Full=Asparagine synthetase [glutamine-hydrolyzing] {ECO:0000256|PIRNR:PIRNR001589}; EC=6.3.5.4 {ECO:0000256|PIRNR:PIRNR001589};	Asparagine synthase (glutamine-hydrolyzing)	GO:0004066,asparagine synthase (glutamine-hydrolyzing) activity; GO:0005524,ATP binding; GO:0006541,glutamine metabolic process; GO:0070981,L-asparagine biosynthetic process; GO:0003674,molecular_function; GO:0003824,catalytic activity; GO:0016874,ligase activity; GO:0016879,ligase activity, forming carbon-nitrogen bonds; GO:0016884,carbon-nitrogen ligase activity, with glutamine as amido-N-donor…	Asparagine synthase	--	--	--
Cluster-134097.7	1.54	1.96	1.23	33.1	33.27	32.29	109	152	86	2253	2656	2178	4.42018	0	0	up	3168	K15255 ATP-dependent DNA helicase PIF1 [EC:5.6.2.3] | (RefSeq) ATP-dependent DNA helicase PIF1-like (A)	--	hypothetical protein CFC21_099501 [Triticum aestivum]	NEC2_NESMA RecName: Full=Ferritin-like catalase Nec2 {ECO:0000303|PubMed:35074876}; EC=1.11.1.6 {ECO:0000269|PubMed:35074876}; AltName: Full=Nectar protein 2 {ECO:0000303|PubMed:35074876}; Short=NmNec2 {ECO:0000303|PubMed:35074876}; Flags: Precursor;	A0A446XSX5_TRITD SubName: Full=Uncharacterized protein {ECO:0000313|EMBL:VAI79401.1};	--	--	Ferritin-like domain	--	--	--
Cluster-134117.8	31.7	31.78	29.42	134.33	135.79	135.08	1716	1893	1564	6910	8185	6879	2.15257	0	0	up	2466	K00469 inositol oxygenase [EC:1.13.99.1] | (RefSeq) probable inositol oxygenase (A)	ko00053: Ascorbate and aldarate metabolism; ko00562: Inositol phosphate metabolism; ko01100: Metabolic pathways; ko01250: Biosynthesis of nucleotide sugars	probable inositol oxygenase [Hordeum vulgare subsp. vulgare]	MIOX_ORYSJ RecName: Full=Probable inositol oxygenase; EC=1.13.99.1; AltName: Full=Myo-inositol oxygenase; Short=MI oxygenase;	A0A453SDY3_AEGTS RecName: Full=Inositol oxygenase {ECO:0000256|ARBA:ARBA00011919, ECO:0000256|RuleBase:RU367039}; EC=1.13.99.1 {ECO:0000256|ARBA:ARBA00011919, ECO:0000256|RuleBase:RU367039}; AltName: Full=Myo-inositol oxygenase {ECO:0000256|RuleBase:RU367039};	Aldehyde reductase	GO:0005737,cytoplasm; GO:0050113,inositol oxygenase activity; GO:0005506,iron ion binding; GO:0019310,inositol catabolic process; GO:0019853,L-ascorbic acid biosynthetic process; GO:0003674,molecular_function; GO:0003824,catalytic activity; GO:0004497,monooxygenase activity; GO:0016491,oxidoreductase activity; GO:0016701,oxidoreductase activity, acting on single donors with incorporation of molec…	Myo-inositol oxygenase	--	--	--
Cluster-135274.0	32.99	31.97	26.4	762.52	739.31	749.43	667	705	516	14354	16302	13881	4.6278	0	0	up	1369	K02866 large subunit ribosomal protein L10e | (RefSeq) 60S ribosomal protein L10-like isoform X1 (A)	ko03010: Ribosome	60S ribosomal protein L10-like isoform X1 [Triticum dicoccoides]	RL10_VITRI RecName: Full=60S ribosomal protein L10; AltName: Full=QM protein homolog;	A0A446S4G9_TRITD RecName: Full=Ribosomal_L16 domain-containing protein {ECO:0000259|Pfam:PF00252};	60s ribosomal protein L10	GO:0005840,ribosome; GO:0003735,structural constituent of ribosome; GO:0006412,translation; GO:0003674,molecular_function; GO:0005198,structural molecule activity; GO:0006518,peptide metabolic process; GO:0006807,nitrogen compound metabolic process; GO:0008150,biological_process; GO:0008152,metabolic process; GO:0009058,biosynthetic process; GO:0009059,macromolecule biosynthetic process; GO:00099…	Ribosomal protein L16p/L10e	--	--	--
Cluster-135674.6	178.1	193.53	197.79	550.52	549.89	525.39	7736	9243	8437	22701	26570	21435	1.54134	0	0	up	2039	K25900 cysteine proteinase RD21 [EC:3.4.22.-] | (RefSeq) oryzain alpha chain-like (A)	--	oryzain alpha chain-like [Hordeum vulgare subsp. vulgare]	ORYA_ORYSJ RecName: Full=Oryzain alpha chain; EC=3.4.22.-; Flags: Precursor;	A0A453D862_AEGTS SubName: Full=Uncharacterized protein {ECO:0000313|EnsemblPlants:AET2Gv21126300.2};	Cysteine proteinase Cathepsin L	GO:0005615,extracellular space; GO:0005764,lysosome; GO:0004197,cysteine-type endopeptidase activity; GO:0051603,proteolysis involved in protein catabolic process; GO:0003674,molecular_function; GO:0003824,catalytic activity; GO:0004175,endopeptidase activity; GO:0008233,peptidase activity; GO:0008234,cysteine-type peptidase activity; GO:0016787,hydrolase activity; GO:0140096,catalytic activity, …	Papain family cysteine protease	--	--	--
Cluster-135710.11	144.05	151.82	150.29	615.8	604.25	598.42	3646	4214	3736	14753	16959	14147	2.04977	0	0	up	1316	K20721 reticulon-1 | (RefSeq) reticulon-like protein B1 (A)	--	reticulon-like protein B1 [Hordeum vulgare subsp. vulgare]	RTNLB_ARATH RecName: Full=Reticulon-like protein B2; Short=AtRTNLB2; AltName: Full=VirB2-interacting protein 2;	F2DHE3_HORVV RecName: Full=Reticulon-like protein {ECO:0000256|RuleBase:RU363132};	Reticulon	GO:0005783,endoplasmic reticulum; GO:0005789,endoplasmic reticulum membrane; GO:0071782,endoplasmic reticulum tubular network; GO:0005794,Golgi apparatus; GO:0071458,integral component of cytoplasmic side of endoplasmic reticulum membrane; GO:0005886,plasma membrane; GO:0003729,mRNA binding; GO:0071786,endoplasmic reticulum tubular network organization; GO:0009617,response to bacterium; GO:000367…	Reticulon	--	--	--
Cluster-135714.17	8.11	8.07	7.75	61.37	64.32	64.16	371	433	371	2845	3495	2945	3.04738	0	0	up	2254	K14445 solute carrier family 13 (sodium-dependent dicarboxylate transporter), member 2/3/5 | (RefSeq) tonoplast dicarboxylate transporter-like (A)	--	tonoplast dicarboxylate transporter-like [Triticum dicoccoides]	TDT_ARATH RecName: Full=Tonoplast dicarboxylate transporter; Short=AttDT; AltName: Full=Sodium-dicarboxylate cotransporter-like; Short=AtSDAT; AltName: Full=Vacuolar malate transporter;	A0A446UDP2_TRITD SubName: Full=Uncharacterized protein {ECO:0000313|EMBL:VAI33697.1};	Na+/dicarboxylate, Na+/tricarboxylate and phosphate transporters	GO:0016021,integral component of membrane; GO:0005774,vacuolar membrane; GO:0005773,vacuole; GO:0015140,malate transmembrane transporter activity; GO:0098656,anion transmembrane transport; GO:0015743,malate transport; GO:0051453,regulation of intracellular pH; GO:0003674,molecular_function; GO:0005215,transporter activity; GO:0005310,dicarboxylic acid transmembrane transporter activity; GO:000534…	Sodium:sulfate symporter transmembrane region	--	--	--
Cluster-135714.22	11.7	13.12	12.3	54.15	55.15	53.74	658	812	679	2893	3453	2843	2.16216	0	0	up	2549	K14445 solute carrier family 13 (sodium-dependent dicarboxylate transporter), member 2/3/5 | (RefSeq) tonoplast dicarboxylate transporter-like (A)	--	tonoplast dicarboxylate transporter-like [Triticum aestivum]	TDT_ARATH RecName: Full=Tonoplast dicarboxylate transporter; Short=AttDT; AltName: Full=Sodium-dicarboxylate cotransporter-like; Short=AtSDAT; AltName: Full=Vacuolar malate transporter;	A0A453RJB4_AEGTS SubName: Full=Uncharacterized protein {ECO:0000313|EnsemblPlants:AET7Gv20600600.3};	Na+/dicarboxylate, Na+/tricarboxylate and phosphate transporters	GO:0016021,integral component of membrane; GO:0005774,vacuolar membrane; GO:0005773,vacuole; GO:0015140,malate transmembrane transporter activity; GO:0098656,anion transmembrane transport; GO:0015743,malate transport; GO:0051453,regulation of intracellular pH; GO:0003674,molecular_function; GO:0005215,transporter activity; GO:0005310,dicarboxylic acid transmembrane transporter activity; GO:000534…	Sodium:sulfate symporter transmembrane region	--	--	--
Cluster-13589.3	641.47	626.8	586.98	81.43	93.46	93.49	14277	15365	12849	1796	2251	1815	-2.79441	0	0	down	1324	K11855 ubiquitin carboxyl-terminal hydrolase 36/42 [EC:3.4.19.12] | (RefSeq) ubiquitin carboxyl-terminal hydrolase 36 (A)	--	36.4 kDa proline-rich protein-like [Triticum urartu]	PRF1_SOLLC RecName: Full=36.4 kDa proline-rich protein;	A0A3B6B877_WHEAT RecName: Full=AAI domain-containing protein {ECO:0000259|SMART:SM00499};	--	--	Hydrophobic seed protein	--	--	--
Cluster-136403.11	27.77	29.74	28.63	129.57	124.78	128.17	747	878	756	3302	3726	3224	2.17384	0	0	up	1380	K01673 carbonic anhydrase [EC:4.2.1.1] | (RefSeq) beta carbonic anhydrase 5, chloroplastic-like isoform X1 (A)	ko00910: Nitrogen metabolism; ko01100: Metabolic pathways	beta carbonic anhydrase 5, chloroplastic-like isoform X4 [Triticum aestivum]	BCA5_ARATH RecName: Full=Beta carbonic anhydrase 5, chloroplastic; Short=AtbCA5; Short=AtbetaCA5; EC=4.2.1.1; AltName: Full=Beta carbonate dehydratase 5; Flags: Precursor;	A0A446T544_TRITD RecName: Full=Carbonic anhydrase {ECO:0000256|ARBA:ARBA00012925, ECO:0000256|RuleBase:RU003956}; EC=4.2.1.1 {ECO:0000256|ARBA:ARBA00012925, ECO:0000256|RuleBase:RU003956}; AltName: Full=Carbonate dehydratase {ECO:0000256|RuleBase:RU003956};	Predicted carbonic anhydrase involved in protection against oxidative damage	GO:0009507,chloroplast; GO:0004089,carbonate dehydratase activity; GO:0008270,zinc ion binding; GO:0015976,carbon utilization; GO:0003674,molecular_function; GO:0003824,catalytic activity; GO:0016829,lyase activity; GO:0016835,carbon-oxygen lyase activity; GO:0016836,hydro-lyase activity; GO:0005488,binding; GO:0043167,ion binding; GO:0043169,cation binding; GO:0046872,metal ion binding; GO:00469…	Carbonic anhydrase	--	--	--
Cluster-137410.0	18.96	16.06	16.14	269.91	260.43	286.6	471	429	385	6238	7052	6533	4.0141	0	0	up	1777	--	--	outer envelope pore protein 16-2, chloroplastic [Hordeum vulgare]	OP162_ARATH RecName: Full=Outer envelope pore protein 16-2, chloroplastic; AltName: Full=Chloroplastic outer envelope pore protein of 16 kDa 2; Short=AtOEP16-2; Short=OEP16-2; AltName: Full=Outer plastid envelope protein 16-S; Short=AtOEP16-S; Short=Seeds outer plastid envelope protein 16;	M8B537_TRIUA SubName: Full=Uncharacterized protein {ECO:0000313|EMBL:EMS68749.1, ECO:0000313|EnsemblPlants:TRIUR3_14005-P1};	--	GO:0031359,integral component of chloroplast outer membrane; GO:0009527,plastid outer membrane; GO:0046930,pore complex; GO:0015171,amino acid transmembrane transporter activity; GO:0015288,porin activity; GO:0042803,protein homodimerization activity; GO:0006811,ion transport; GO:0003674,molecular_function; GO:0005215,transporter activity; GO:0005342,organic acid transmembrane transporter activit…	--	--	--	--
Cluster-137722.3	577.69	636.24	634.32	176.96	192.95	199.27	14590	16649	14418	4376	4940	4524	-1.65246	0	0	down	1455	K00679 phospholipid:diacylglycerol acyltransferase [EC:2.3.1.158] | (RefSeq) hypothetical protein (A)	ko00561: Glycerolipid metabolism; ko01100: Metabolic pathways	GDSL esterase/lipase At5g33370-like isoform X2 [Triticum dicoccoides]	GDL87_ARATH RecName: Full=GDSL esterase/lipase At5g55050; EC=3.1.1.-; AltName: Full=Extracellular lipase At5g55050; Flags: Precursor;	A0A453TAC4_AEGTS SubName: Full=Uncharacterized protein {ECO:0000313|EnsemblPlants:AET7Gv21312000.2};	--	GO:0005576,extracellular region; GO:0009536,plastid; GO:0016298,lipase activity; GO:0016042,lipid catabolic process; GO:0003674,molecular_function; GO:0003824,catalytic activity; GO:0016787,hydrolase activity; GO:0016788,hydrolase activity, acting on ester bonds; GO:0006629,lipid metabolic process; GO:0008150,biological_process; GO:0008152,metabolic process; GO:0009056,catabolic process; GO:00442…	GDSL-like Lipase/Acylhydrolase	--	--	--
Cluster-138169.7	24.65	23.65	23.21	227.96	237.87	235.98	1283	1370	1188	11361	13888	11583	3.3255	0	0	up	2496	K13071 pheophorbide a oxygenase [EC:1.14.15.17] | (RefSeq) pheophorbide a oxygenase, chloroplastic (A)	ko00860: Porphyrin metabolism; ko01110: Biosynthesis of secondary metabolites	unnamed protein product [Triticum turgidum subsp. durum]	PTC52_ARATH RecName: Full=Protochlorophyllide-dependent translocon component 52, chloroplastic; AltName: Full=ACD1-like protein; AltName: Full=Protein TIC 55-IV; AltName: Full=Translocon at the inner envelope membrane of chloroplasts 55-IV; Flags: Precursor;	A0A453QWL6_AEGTS RecName: Full=Rieske domain-containing protein {ECO:0000259|PROSITE:PS51296};	--	GO:0009941,chloroplast envelope; GO:0009706,chloroplast inner membrane; GO:0005737,cytoplasm; GO:0005829,cytosol; GO:0016021,integral component of membrane; GO:0009536,plastid; GO:0051537,2 iron, 2 sulfur cluster binding; GO:0010277,chlorophyllide a oxygenase [overall] activity; GO:0046872,metal ion binding; GO:0016491,oxidoreductase activity; GO:0015031,protein transport; GO:0003674,molecular_fu…	Pheophorbide a oxygenase	--	--	--
Cluster-138465.1	10.99	10.64	7.76	273.31	290.22	302.16	142	145	105	3360	4188	3609	4.89613	0	0	up	978	--	--	uncharacterized protein LOC109755622 [Aegilops tauschii subsp. strangulata]	--	A0A446VMK6_TRITD SubName: Full=Uncharacterized protein {ECO:0000313|EMBL:VAI49121.1};	--	--	--	--	--	--
Cluster-138557.0	52.52	52.37	53.93	132.71	134.64	129.76	2326	2550	2345	5580	6634	5398	1.35025	0	0	up	2073	K07198 5'-AMP-activated protein kinase, catalytic alpha subunit [EC:2.7.11.11] | (RefSeq) CBL-interacting serine/threonine-protein kinase 1-like (A)	--	CBL-interacting protein kinase 9-like [Triticum dicoccoides]	CIPK9_ORYSJ RecName: Full=CBL-interacting protein kinase 9; EC=2.7.11.1; AltName: Full=OsCIPK09;	A0A453J148_AEGTS RecName: Full=Non-specific serine/threonine protein kinase {ECO:0000256|ARBA:ARBA00012513}; EC=2.7.11.1 {ECO:0000256|ARBA:ARBA00012513};	Serine/threonine protein kinase	GO:0005524,ATP binding; GO:0106310,protein serine kinase activity; GO:0004674,protein serine/threonine kinase activity; GO:0006468,protein phosphorylation; GO:0007165,signal transduction; GO:0000166,nucleotide binding; GO:0003674,molecular_function; GO:0005488,binding; GO:0017076,purine nucleotide binding; GO:0030554,adenyl nucleotide binding; GO:0032553,ribonucleotide binding; GO:0032555,purine …	Protein kinase domain	--	--	--
Cluster-139483.0	50.49	49.32	51.6	155.21	161.81	156.91	2029	2179	2037	5921	7233	5921	1.67403	0	0	up	1910	K03979 GTPase [EC:3.6.5.-] | (RefSeq) uncharacterized protein (A)	--	probable GTP-binding protein OBGC1, chloroplastic [Triticum aestivum]	OBGC1_ORYSI RecName: Full=Probable GTP-binding protein OBGC1, chloroplastic; Flags: Precursor;	A0A453AR44_AEGTS SubName: Full=Uncharacterized protein {ECO:0000313|EnsemblPlants:AET2Gv20233100.3};	Predicted GTP-binding protein (ODN superfamily)	GO:0009507,chloroplast; GO:0005525,GTP binding; GO:0003924,GTPase activity; GO:0000287,magnesium ion binding; GO:0000166,nucleotide binding; GO:0003674,molecular_function; GO:0005488,binding; GO:0017076,purine nucleotide binding; GO:0019001,guanyl nucleotide binding; GO:0032553,ribonucleotide binding; GO:0032555,purine ribonucleotide binding; GO:0032561,guanyl ribonucleotide binding; GO:0035639,p…	GTP1/OBG	--	--	--
Cluster-141116.1	6.3	6.28	6.42	66.37	72.07	68.48	345	378	345	3452	4393	3527	3.47477	0	0	up	2490	K09286 EREBP-like factor | (RefSeq) ethylene-responsive transcription factor ERF054-like (A)	--	unnamed protein product [Triticum turgidum subsp. durum]	ERF53_ARATH RecName: Full=Ethylene-responsive transcription factor ERF053 {ECO:0000305}; Short=AtERF53 {ECO:0000303|PubMed:22095047};	A0A446WFB9_TRITD RecName: Full=AP2/ERF domain-containing protein {ECO:0000259|PROSITE:PS51032};	--	GO:0005737,cytoplasm; GO:0005634,nucleus; GO:0003700,DNA-binding transcription factor activity; GO:0043565,sequence-specific DNA binding; GO:0000976,transcription cis-regulatory region binding; GO:0009873,ethylene-activated signaling pathway; GO:1900036,positive regulation of cellular response to heat; GO:0045893,positive regulation of DNA-templated transcription; GO:2000070,regulation of respons…	AP2 domain	AP2/ERF-ERF	TF	AP2/ERF->AP2/ERF-ERF
Cluster-141497.4	6.13	5.14	6.3	72.93	72.4	72.42	353	327	357	4004	4658	3937	3.66631	0	0	up	2611	K22013 magnesium dechelatase [EC:4.99.1.10] | (RefSeq) protein STAY-GREEN, chloroplastic-like (A)	ko00860: Porphyrin metabolism; ko01110: Biosynthesis of secondary metabolites	protein STAY-GREEN, chloroplastic-like [Triticum dicoccoides]	SGR_ORYSI RecName: Full=Protein STAY-GREEN, chloroplastic; AltName: Full=Protein STAYGREEN; Flags: Precursor;	A0A446TA51_TRITD RecName: Full=Staygreen domain-containing protein {ECO:0000259|Pfam:PF12638};	--	GO:0009507,chloroplast; GO:0005575,cellular_component; GO:0005622,intracellular anatomical structure; GO:0005737,cytoplasm; GO:0009536,plastid; GO:0043226,organelle; GO:0043227,membrane-bounded organelle; GO:0043229,intracellular organelle; GO:0043231,intracellular membrane-bounded organelle; GO:0110165,cellular anatomical entity	Staygreen protein	--	--	--
Cluster-14465.2	53.1	56.27	58.35	244.34	251.66	236.66	1874	2181	2022	8177	9869	7830	2.15358	0	0	up	1714	K01681 aconitate hydratase [EC:4.2.1.3] | (RefSeq) putative aconitate hydratase, cytoplasmic (A)	ko00020: Citrate cycle (TCA cycle); ko00630: Glyoxylate and dicarboxylate metabolism; ko01100: Metabolic pathways; ko01110: Biosynthesis of secondary metabolites; ko01200: Carbon metabolism; ko01210: 2-Oxocarboxylic acid metabolism; ko01230: Biosynthesis of amino acids	unnamed protein product [Triticum turgidum subsp. durum]	ACOHC_ORYSJ RecName: Full=Putative aconitate hydratase, cytoplasmic; Short=Aconitase; EC=4.2.1.3; AltName: Full=Citrate hydro-lyase;	A0A446WT17_TRITD SubName: Full=Uncharacterized protein {ECO:0000313|EMBL:VAI63270.1};	RNA-binding translational regulator IRP (aconitase superfamily)	GO:0005829,cytosol; GO:0005739,mitochondrion; GO:0051539,4 iron, 4 sulfur cluster binding; GO:0003994,aconitate hydratase activity; GO:0047780,citrate dehydratase activity; GO:0030350,iron-responsive element binding; GO:0046872,metal ion binding; GO:0006101,citrate metabolic process; GO:0006097,glyoxylate cycle; GO:0006099,tricarboxylic acid cycle; GO:0003674,molecular_function; GO:0005488,bindin…	Aconitase C-terminal domain	--	--	--
Cluster-16688.13	202.31	200.99	189.45	1354.53	1350.66	1386	5156	5618	4742	32678	38174	32997	2.80945	0	0	up	1323	K13513 lysocardiolipin and lysophospholipid acyltransferase [EC:2.3.1.- 2.3.1.51] | (RefSeq) probable 1-acyl-sn-glycerol-3-phosphate acyltransferase 4 isoform X1 (A)	ko00561: Glycerolipid metabolism; ko00564: Glycerophospholipid metabolism; ko01100: Metabolic pathways; ko01110: Biosynthesis of secondary metabolites	alpha-amylase/trypsin inhibitor-like [Triticum urartu]	TLP_ACTDE RecName: Full=Thaumatin-like protein; AltName: Allergen=Act d 2; Flags: Precursor;	A0A446TTC5_TRITD SubName: Full=Uncharacterized protein {ECO:0000313|EMBL:VAI26613.1};	--	GO:0005576,extracellular region; GO:0050832,defense response to fungus; GO:0031640,killing of cells of another organism; GO:0006950,response to stress; GO:0006952,defense response; GO:0008150,biological_process; GO:0009605,response to external stimulus; GO:0009607,response to biotic stimulus; GO:0009620,response to fungus; GO:0043207,response to external biotic stimulus; GO:0044419,biological pro…	Thaumatin family	--	--	--
Cluster-16688.6	164.28	154.29	142.52	980.72	1000.42	999.92	4014	4133	3420	22675	27098	22808	2.71413	0	0	up	1281	K13513 lysocardiolipin and lysophospholipid acyltransferase [EC:2.3.1.- 2.3.1.51] | (RefSeq) probable 1-acyl-sn-glycerol-3-phosphate acyltransferase 4 isoform X1 (A)	ko00561: Glycerolipid metabolism; ko00564: Glycerophospholipid metabolism; ko01100: Metabolic pathways; ko01110: Biosynthesis of secondary metabolites	pathogenesis-related 5 protein Cup a 3-like [Hordeum vulgare subsp. vulgare]	TLP_ACTDE RecName: Full=Thaumatin-like protein; AltName: Allergen=Act d 2; Flags: Precursor;	F2CTV7_HORVV SubName: Full=Predicted protein {ECO:0000313|EMBL:BAJ86278.1};	--	GO:0005576,extracellular region; GO:0050832,defense response to fungus; GO:0031640,killing of cells of another organism; GO:0006950,response to stress; GO:0006952,defense response; GO:0008150,biological_process; GO:0009605,response to external stimulus; GO:0009607,response to biotic stimulus; GO:0009620,response to fungus; GO:0043207,response to external biotic stimulus; GO:0044419,biological pro…	Thaumatin family	--	--	--
Cluster-16688.8	475.82	489.33	488.2	3296.56	3172.74	3213.62	1774	1937	1788	11216	12608	10438	2.70478	0	0	up	452	K13513 lysocardiolipin and lysophospholipid acyltransferase [EC:2.3.1.- 2.3.1.51] | (RefSeq) probable 1-acyl-sn-glycerol-3-phosphate acyltransferase 4 isoform X1 (A)	ko00561: Glycerolipid metabolism; ko00564: Glycerophospholipid metabolism; ko01100: Metabolic pathways; ko01110: Biosynthesis of secondary metabolites	alpha-amylase/trypsin inhibitor-like [Triticum dicoccoides]	TLP_ORYSJ RecName: Full=Thaumatin-like protein; Flags: Precursor;	Q8S4P7_WHEAT SubName: Full=Thaumatin-like protein {ECO:0000313|EMBL:AAM15877.1, ECO:0000313|EnsemblPlants:TraesCS5A02G017900.1.cds1};	--	GO:0005576,extracellular region; GO:0006952,defense response; GO:0006950,response to stress; GO:0008150,biological_process; GO:0050896,response to stimulus; GO:0005575,cellular_component; GO:0110165,cellular anatomical entity	Thaumatin family	--	--	--
Cluster-16688.9	197.93	211.84	182.72	1109.33	1148.01	1159.46	3159	3694	2864	16689	20227	17148	2.54381	0	0	up	943	K13513 lysocardiolipin and lysophospholipid acyltransferase [EC:2.3.1.- 2.3.1.51] | (RefSeq) probable 1-acyl-sn-glycerol-3-phosphate acyltransferase 4 isoform X1 (A)	ko00561: Glycerolipid metabolism; ko00564: Glycerophospholipid metabolism; ko01100: Metabolic pathways; ko01110: Biosynthesis of secondary metabolites	pathogenesis-related 5 protein Cup a 3-like [Hordeum vulgare subsp. vulgare]	TLP_ACTCC RecName: Full=Thaumatin-like protein; AltName: Allergen=Act c 2; Flags: Precursor;	F2CTV7_HORVV SubName: Full=Predicted protein {ECO:0000313|EMBL:BAJ86278.1};	--	GO:0005576,extracellular region; GO:0050832,defense response to fungus; GO:0031640,killing of cells of another organism; GO:0006950,response to stress; GO:0006952,defense response; GO:0008150,biological_process; GO:0009605,response to external stimulus; GO:0009607,response to biotic stimulus; GO:0009620,response to fungus; GO:0043207,response to external biotic stimulus; GO:0044419,biological pro…	Thaumatin family	--	--	--
Cluster-1834.13	2080.19	2166.88	2127.64	980.59	1000.39	988.64	79827	91381	80181	35702	42678	35596	-1.07555	0	0	down	1837	K01623 fructose-bisphosphate aldolase, class I [EC:4.1.2.13] | (RefSeq) fructose-bisphosphate aldolase, chloroplastic-like (A)	ko00010: Glycolysis / Gluconeogenesis; ko00030: Pentose phosphate pathway; ko00051: Fructose and mannose metabolism; ko00710: Carbon fixation in photosynthetic organisms; ko01100: Metabolic pathways; ko01110: Biosynthesis of secondary metabolites; ko01200: Carbon metabolism; ko01230: Biosynthesis of amino acids	fructose-bisphosphate aldolase, chloroplastic [Aegilops tauschii subsp. strangulata]	ALFP_ORYSJ RecName: Full=Fructose-bisphosphate aldolase, chloroplastic {ECO:0000305}; EC=4.1.2.13 {ECO:0000305}; AltName: Full=Chloroplastic aldolase {ECO:0000303|PubMed:8163192}; Short=AldP {ECO:0000303|PubMed:8163192}; Flags: Precursor;	W5G4A2_WHEAT RecName: Full=Fructose-bisphosphate aldolase {ECO:0000256|ARBA:ARBA00013068, ECO:0000256|RuleBase:RU003994}; EC=4.1.2.13 {ECO:0000256|ARBA:ARBA00013068, ECO:0000256|RuleBase:RU003994};	Fructose-biphosphate aldolase	GO:0005737,cytoplasm; GO:0005829,cytosol; GO:0010287,plastoglobule; GO:0004332,fructose-bisphosphate aldolase activity; GO:0030388,fructose 1,6-bisphosphate metabolic process; GO:0006094,gluconeogenesis; GO:0006096,glycolytic process; GO:0003674,molecular_function; GO:0003824,catalytic activity; GO:0016829,lyase activity; GO:0016830,carbon-carbon lyase activity; GO:0016832,aldehyde-lyase activity…	Fructose-bisphosphate aldolase class-I	--	--	--
Cluster-18514.1	7.04	6.54	7.48	37.01	36.92	37	409	418	426	2044	2390	2023	2.42976	0	0	up	2625	K05863 solute carrier family 25 (mitochondrial adenine nucleotide translocator), member 4/5/6/31 | (RefSeq) ADP,ATP carrier protein-like (A)	--	ADP,ATP carrier protein [Aegilops tauschii subsp. strangulata]	ADT3_ARATH RecName: Full=ADP,ATP carrier protein 3, mitochondrial; AltName: Full=ADP/ATP translocase 3; AltName: Full=Adenine nucleotide translocator 3; Short=ANT 3; Flags: Precursor;	R7W2R7_AEGTA RecName: Full=ADP/ATP translocase {ECO:0000256|RuleBase:RU368008}; AltName: Full=ADP,ATP carrier protein {ECO:0000256|RuleBase:RU368008};	Mitochondrial ADP/ATP carrier proteins	GO:0009941,chloroplast envelope; GO:0016021,integral component of membrane; GO:0016020,membrane; GO:0005743,mitochondrial inner membrane; GO:0005739,mitochondrion; GO:0005886,plasma membrane; GO:0005471,ATP:ADP antiporter activity; GO:0140021,mitochondrial ADP transmembrane transport; GO:1990544,mitochondrial ATP transmembrane transport; GO:0015865,purine nucleotide transport; GO:0000295,adenine …	BA14K-like protein	--	--	--
Cluster-1862.7	132.54	133.92	141.25	534.38	510.4	528.95	3180	3602	3403	12406	13643	12115	1.97397	0	0	up	1285	K04733 interleukin-1 receptor-associated kinase 4 [EC:2.7.11.1] | (RefSeq) putative receptor-like protein kinase At4g00960 (A)	--	mannose/glucose-specific lectin-like [Lolium rigidum]	LEC_PARPU RecName: Full=Mannose/glucose-specific lectin {ECO:0000250|UniProtKB:P83304}; Short=PpeL {ECO:0000303|Ref.1};	E3VWM0_WHEAT SubName: Full=Jacalin-related lectin 1 {ECO:0000313|EMBL:ADP37001.1, ECO:0000313|EnsemblPlants:TraesCS5A02G506900.1};	--	GO:0005536,glucose binding; GO:0005537,mannose binding; GO:0003674,molecular_function; GO:0005488,binding; GO:0030246,carbohydrate binding; GO:0036094,small molecule binding; GO:0048029,monosaccharide binding	Jacalin-like lectin domain	--	--	--
Cluster-19535.5	1233.77	1246.55	1179.77	335.83	343.34	322.75	19850	21912	18641	5092	6097	4811	-1.85282	0	0	down	948	--	--	germin-like protein 8-14 [Hordeum vulgare subsp. vulgare]	GL814_ORYSJ RecName: Full=Germin-like protein 8-14; AltName: Full=Germin-like protein 1; AltName: Full=Germin-like protein 5; Short=OsGER5; Flags: Precursor;	A0A453R4Z7_AEGTS RecName: Full=Germin-like protein {ECO:0000256|RuleBase:RU366015};	--	GO:0048046,apoplast; GO:0030145,manganese ion binding; GO:0003674,molecular_function; GO:0005488,binding; GO:0043167,ion binding; GO:0043169,cation binding; GO:0046872,metal ion binding; GO:0046914,transition metal ion binding; GO:0005575,cellular_component; GO:0005576,extracellular region; GO:0110165,cellular anatomical entity	Cupin	--	--	--
Cluster-19535.8	2220.75	2384.37	2337.68	638.11	622.14	663.53	11824	13845	12131	3090	3619	3072	-1.88354	0	0	down	533	--	--	germin-like protein 8-14 [Triticum dicoccoides]	GL814_ORYSJ RecName: Full=Germin-like protein 8-14; AltName: Full=Germin-like protein 1; AltName: Full=Germin-like protein 5; Short=OsGER5; Flags: Precursor;	A0A3B6BZ05_WHEAT RecName: Full=Germin-like protein {ECO:0000256|RuleBase:RU366015};	--	GO:0048046,apoplast; GO:0030145,manganese ion binding; GO:0003674,molecular_function; GO:0005488,binding; GO:0043167,ion binding; GO:0043169,cation binding; GO:0046872,metal ion binding; GO:0046914,transition metal ion binding; GO:0005575,cellular_component; GO:0005576,extracellular region; GO:0110165,cellular anatomical entity	Cupin	--	--	--
Cluster-1989.6	15.67	17.08	19.59	73.21	76.37	72.23	1370	1517	1403	5778	6837	5503	2.1422	0	0	up	4369	K01535 H+-transporting ATPase [EC:7.1.2.1] | (RefSeq) plasma membrane ATPase 1 isoform X1 (A)	ko00190: Oxidative phosphorylation; ko01100: Metabolic pathways	plasma membrane ATPase 1-like isoform X2 [Triticum aestivum]	PMA1_SOLLC RecName: Full=Plasma membrane ATPase 1; EC=7.1.2.1; AltName: Full=Proton pump 1;	A0A3B6JDT8_WHEAT RecName: Full=Plasma membrane ATPase {ECO:0000256|RuleBase:RU362083}; EC=7.1.2.1 {ECO:0000256|RuleBase:RU362083};	Plasma membrane H+-transporting ATPase	GO:0016021,integral component of membrane; GO:0005886,plasma membrane; GO:0005524,ATP binding; GO:0016887,ATP hydrolysis activity; GO:0046872,metal ion binding; GO:0015662,P-type ion transporter activity; GO:0008553,P-type proton-exporting transporter activity; GO:0034220,ion transmembrane transport; GO:0120029,proton export across plasma membrane; GO:1902600,proton transmembrane transport; GO:00…	haloacid dehalogenase-like hydrolase	--	--	--
Cluster-22744.0	110.79	111.1	110.83	748.52	758.12	734.43	3589	3956	3544	23025	27392	22360	2.77849	0	0	up	1612	K00457 4-hydroxyphenylpyruvate dioxygenase [EC:1.13.11.27] | (RefSeq) 4-hydroxyphenylpyruvate dioxygenase isoform X1 (A)	ko00130: Ubiquinone and other terpenoid-quinone biosynthesis; ko00350: Tyrosine metabolism; ko00360: Phenylalanine metabolism; ko01100: Metabolic pathways; ko01240: Biosynthesis of cofactors	predicted protein [Hordeum vulgare subsp. vulgare]	HPPD_HORVU RecName: Full=4-hydroxyphenylpyruvate dioxygenase; EC=1.13.11.27; AltName: Full=4-hydroxyphenylpyruvic acid oxidase; Short=4HPPD; Short=HPD; Short=HPPDase;	A0A453NG28_AEGTS RecName: Full=4-hydroxyphenylpyruvate dioxygenase {ECO:0000256|PIRNR:PIRNR009283};	4-hydroxyphenylpyruvate dioxygenase	GO:0005737,cytoplasm; GO:0003868,4-hydroxyphenylpyruvate dioxygenase activity; GO:0042802,identical protein binding; GO:0005506,iron ion binding; GO:0006559,L-phenylalanine catabolic process; GO:0006572,tyrosine catabolic process; GO:0003674,molecular_function; GO:0003824,catalytic activity; GO:0016491,oxidoreductase activity; GO:0016701,oxidoreductase activity, acting on single donors with incor…	Glyoxalase/Bleomycin resistance protein/Dioxygenase superfamily	--	--	--
Cluster-24362.8	188.02	196.36	200.49	1550.22	1585.13	1531.1	11014	12658	11533	86302	103413	84412	3.02535	0	0	up	2643	K06617 raffinose synthase [EC:2.4.1.82] | (RefSeq) probable galactinol--sucrose galactosyltransferase 2 (A)	ko00052: Galactose metabolism; ko01100: Metabolic pathways	unnamed protein product [Triticum turgidum subsp. durum]	RFS2_ARATH RecName: Full=Probable galactinol--sucrose galactosyltransferase 2; EC=2.4.1.82; AltName: Full=Protein SEED IMBIBITION 2; AltName: Full=Raffinose synthase 2;	A0A446PGC8_TRITD RecName: Full=Galactinol--sucrose galactosyltransferase {ECO:0000256|ARBA:ARBA00012708}; EC=2.4.1.82 {ECO:0000256|ARBA:ARBA00012708};	--	GO:0009506,plasmodesma; GO:0016757,glycosyltransferase activity; GO:0052692,raffinose alpha-galactosidase activity; GO:0034484,raffinose catabolic process; GO:0006979,response to oxidative stress; GO:0003674,molecular_function; GO:0003824,catalytic activity; GO:0016740,transferase activity; GO:0004553,hydrolase activity, hydrolyzing O-glycosyl compounds; GO:0004557,alpha-galactosidase activity; G…	Raffinose synthase or seed imbibition protein Sip1	--	--	--
Cluster-26170.6	10.16	9.02	8.84	148.54	141.2	149.14	478	466	408	6639	7396	6597	3.99894	0	0	up	2184	K17609 nucleoredoxin [EC:1.8.1.8] | (RefSeq) probable nucleoredoxin 2 (A)	--	probable nucleoredoxin 2, partial [Triticum aestivum]	NRX2_ORYSJ RecName: Full=Probable nucleoredoxin 2; Short=OsNrx2; EC=1.8.1.8;	F2E989_HORVV SubName: Full=Predicted protein {ECO:0000313|EMBL:BAK03911.1}; Flags: Fragment;	Thioredoxin, nucleoredoxin and related proteins	GO:0047134,protein-disulfide reductase (NAD(P)) activity; GO:0003674,molecular_function; GO:0003824,catalytic activity; GO:0015035,protein-disulfide reductase activity; GO:0015036,disulfide oxidoreductase activity; GO:0016491,oxidoreductase activity; GO:0016667,oxidoreductase activity, acting on a sulfur group of donors; GO:0016668,oxidoreductase activity, acting on a sulfur group of donors, NAD(…	Thioredoxin-like	--	--	--
Cluster-2791.27	119.69	109.24	108.56	969	928.31	1011.78	1952	1944	1748	14665	16464	15080	3.10067	0	0	up	1023	--	--	hypothetical protein CFC21_033691 [Triticum aestivum]	IBB_HORVU RecName: Full=Bowman-Birk type trypsin inhibitor;	A0A453DST5_AEGTS SubName: Full=Uncharacterized protein {ECO:0000313|EnsemblPlants:AET3Gv20066700.4};	--	GO:0005576,extracellular region; GO:0004867,serine-type endopeptidase inhibitor activity; GO:0003674,molecular_function; GO:0004857,enzyme inhibitor activity; GO:0004866,endopeptidase inhibitor activity; GO:0030234,enzyme regulator activity; GO:0030414,peptidase inhibitor activity; GO:0061134,peptidase regulator activity; GO:0061135,endopeptidase regulator activity; GO:0098772,molecular function …	Bowman-Birk serine protease inhibitor family	--	--	--
Cluster-33657.1	18.87	19.69	19.03	108.71	107.47	103	875	1038	900	4966	5748	4660	2.51579	0	0	up	3019	K09699 2-oxoisovalerate dehydrogenase E2 component (dihydrolipoyl transacylase) [EC:2.3.1.168] | (RefSeq) lipoamide acyltransferase component of branched-chain alpha-keto acid dehydrogenase complex, mitochondrial-like (A)	ko00280: Valine, leucine and isoleucine degradation; ko00640: Propanoate metabolism; ko00785: Lipoic acid metabolism; ko01100: Metabolic pathways; ko01110: Biosynthesis of secondary metabolites	unnamed protein product [Triticum turgidum subsp. durum]	ODB2_ARATH RecName: Full=Lipoamide acyltransferase component of branched-chain alpha-keto acid dehydrogenase complex, mitochondrial; EC=2.3.1.168; AltName: Full=Branched-chain alpha-keto acid dehydrogenase complex component E2; Short=BCE2; Short=BCKAD-E2; Short=BCKADE2; AltName: Full=Dihydrolipoamide acetyltransferase component of branched-chain alpha-keto acid dehydrogenase complex; AltName: Ful…	A0A446KJZ5_TRITD RecName: Full=Dihydrolipoamide acetyltransferase component of pyruvate dehydrogenase complex {ECO:0000256|RuleBase:RU003423}; EC=2.3.1.- {ECO:0000256|RuleBase:RU003423};	Dihydrolipoamide transacylase (alpha-keto acid dehydrogenase E2 subunit)	GO:0005737,cytoplasm; GO:0005759,mitochondrial matrix; GO:0005739,mitochondrion; GO:0016407,acetyltransferase activity; GO:0004147,dihydrolipoamide branched chain acyltransferase activity; GO:0043754,dihydrolipoyllysine-residue (2-methylpropanoyl)transferase activity; GO:0031405,lipoic acid binding; GO:0008270,zinc ion binding; GO:0043617,cellular response to sucrose starvation; GO:0006633,fatty …	2-oxoacid dehydrogenases acyltransferase (catalytic domain)	--	--	--
Cluster-3513.2	42.8	39.28	37.13	124.61	123.44	128.35	1746	1872	1592	5071	5968	5032	1.6905	0	0	up	2574	K08232 monodehydroascorbate reductase (NADH) [EC:1.6.5.4] | (RefSeq) monodehydroascorbate reductase 4, cytosolic (A)	ko00053: Ascorbate and aldarate metabolism; ko01100: Metabolic pathways	monodehydroascorbate reductase 4, cytosolic [Hordeum vulgare subsp. vulgare]	MDAR4_ORYSJ RecName: Full=Monodehydroascorbate reductase 4, cytosolic {ECO:0000305}; Short=OsMADR4 {ECO:0000303|PubMed:25546583}; Short=OsMDHAR4 {ECO:0000303|PubMed:25546583}; EC=1.6.5.4 {ECO:0000250|UniProtKB:Q652L6};	A0A8I6YMJ5_HORVV RecName: Full=Pyr_redox_2 domain-containing protein {ECO:0000259|Pfam:PF07992};	Monodehydroascorbate/ferredoxin reductase	GO:0005737,cytoplasm; GO:0050660,flavin adenine dinucleotide binding; GO:0016656,monodehydroascorbate reductase (NADH) activity; GO:0016651,oxidoreductase activity, acting on NAD(P)H; GO:0000166,nucleotide binding; GO:0003674,molecular_function; GO:0005488,binding; GO:0036094,small molecule binding; GO:0043167,ion binding; GO:0043168,anion binding; GO:0097159,organic cyclic compound binding; GO:1…	Pyridine nucleotide-disulphide oxidoreductase	--	--	--
Cluster-36900.19	15.52	17.86	18.95	135.86	149.92	147.79	286	360	343	2368	3061	2536	3.07335	0	0	up	1043	K23452 UDP-glucosyltransferase 85A [EC:2.4.1.-] | (RefSeq) UDP-glycosyltransferase 85A1-like (A)	ko00908: Zeatin biosynthesis; ko01110: Biosynthesis of secondary metabolites	7-deoxyloganetin glucosyltransferase-like [Triticum dicoccoides]	UGT2_GARJA RecName: Full=7-deoxyloganetin glucosyltransferase; EC=2.4.1.324; AltName: Full=Genipin glucosyltransferase; AltName: Full=UDP-glucose glucosyltransferase 2; Short=GjUGT2; AltName: Full=UDP-glycosyltransferase 85A24;	A0A3B6PQW2_WHEAT RecName: Full=Glycosyltransferase {ECO:0000256|RuleBase:RU362057}; EC=2.4.1.- {ECO:0000256|RuleBase:RU362057};	UDP-glucuronosyl and UDP-glucosyl transferase	GO:0035251,UDP-glucosyltransferase activity; GO:0003674,molecular_function; GO:0003824,catalytic activity; GO:0008194,UDP-glycosyltransferase activity; GO:0016740,transferase activity; GO:0016757,glycosyltransferase activity; GO:0016758,hexosyltransferase activity; GO:0046527,glucosyltransferase activity	--	--	--	--
Cluster-36900.50	56.51	47.96	55.97	444.59	446.45	483.27	334	338	287	2239	2711	2262	2.97496	0	0	up	1221	K22706 (R)-mandelonitrile beta-glucosyltransferase [EC:2.4.1.354] | (RefSeq) (R)-mandelonitrile beta-glucosyltransferase-like (A)	ko00460: Cyanoamino acid metabolism; ko01100: Metabolic pathways; ko01110: Biosynthesis of secondary metabolites	unnamed protein product [Triticum turgidum subsp. durum]	UGT2_GARJA RecName: Full=7-deoxyloganetin glucosyltransferase; EC=2.4.1.324; AltName: Full=Genipin glucosyltransferase; AltName: Full=UDP-glucose glucosyltransferase 2; Short=GjUGT2; AltName: Full=UDP-glycosyltransferase 85A24;	A0A453PMS6_AEGTS RecName: Full=UDPGT domain-containing protein {ECO:0000259|PROSITE:PS00375};	UDP-glucuronosyl and UDP-glucosyl transferase	GO:0035251,UDP-glucosyltransferase activity; GO:0003674,molecular_function; GO:0003824,catalytic activity; GO:0008194,UDP-glycosyltransferase activity; GO:0016740,transferase activity; GO:0016757,glycosyltransferase activity; GO:0016758,hexosyltransferase activity; GO:0046527,glucosyltransferase activity	UDP-glucoronosyl and UDP-glucosyl transferase	--	--	--
Cluster-3891.8	26.03	27.76	28.97	124.11	137.78	127.56	785	919	858	3548	4615	3602	2.26048	0	0	up	1510	K01620 threonine aldolase [EC:4.1.2.48] | (RefSeq) probable low-specificity L-threonine aldolase 1 (A)	ko00260: Glycine, serine and threonine metabolism; ko01100: Metabolic pathways; ko01110: Biosynthesis of secondary metabolites; ko01230: Biosynthesis of amino acids	probable low-specificity L-threonine aldolase 1 [Triticum aestivum]	THA1_ARATH RecName: Full=Low-specificity L-threonine aldolase 1 {ECO:0000303|PubMed:15255874, ECO:0000303|PubMed:17172352}; EC=4.1.2.48 {ECO:0000269|PubMed:15255874}; AltName: Full=Threonine aldolase 1 {ECO:0000303|PubMed:15255874, ECO:0000303|PubMed:17172352};	A0A3B6CCJ1_WHEAT RecName: Full=Beta_elim_lyase domain-containing protein {ECO:0000259|Pfam:PF01212};	Threonine aldolase	GO:0005829,cytosol; GO:0008732,L-allo-threonine aldolase activity; GO:0004793,threonine aldolase activity; GO:0006545,glycine biosynthetic process; GO:0006567,threonine catabolic process; GO:0003674,molecular_function; GO:0003824,catalytic activity; GO:0016829,lyase activity; GO:0016830,carbon-carbon lyase activity; GO:0016832,aldehyde-lyase activity; GO:0006082,organic acid metabolic process; GO…	Beta-eliminating lyase	--	--	--
Cluster-3949.3	66.68	63.26	68.24	220.84	228.18	220.65	3270	3422	3175	10182	12354	10161	1.7913	0	0	up	2567	K03797 carboxyl-terminal processing protease [EC:3.4.21.102] | (RefSeq) carboxyl-terminal-processing peptidase 3, chloroplastic-like (A)	--	carboxyl-terminal-processing peptidase 3, chloroplastic [Hordeum vulgare subsp. vulgare]	CTPA3_ARATH RecName: Full=Carboxyl-terminal-processing peptidase 3, chloroplastic; EC=3.4.21.102; AltName: Full=D1 C-terminal processing protease 3; AltName: Full=Photosystem II D1 protein processing peptidase 3; Flags: Precursor;	A0A287WBR8_HORVV SubName: Full=Uncharacterized protein {ECO:0000313|EnsemblPlants:HORVU.MOREX.r3.7HG0675260.1};	--	GO:0009543,chloroplast thylakoid lumen; GO:0004175,endopeptidase activity; GO:0004252,serine-type endopeptidase activity; GO:0006508,proteolysis; GO:0003674,molecular_function; GO:0003824,catalytic activity; GO:0008233,peptidase activity; GO:0016787,hydrolase activity; GO:0140096,catalytic activity, acting on a protein; GO:0008236,serine-type peptidase activity; GO:0017171,serine hydrolase activi…	Peptidase family S41	--	--	--
Cluster-40933.0	9.9	9.39	8.95	108.89	110.35	110.23	533	556	473	5570	6615	5583	3.57288	0	0	up	2454	K14497 protein phosphatase 2C [EC:3.1.3.16] | (RefSeq) probable protein phosphatase 2C 68 (A)	ko04016: MAPK signaling pathway - plant; ko04075: Plant hormone signal transduction	predicted protein, partial [Hordeum vulgare subsp. vulgare]	P2C68_ORYSJ RecName: Full=Probable protein phosphatase 2C 68; Short=OsPP2C68; EC=3.1.3.16;	F2DUA1_HORVV RecName: Full=Protein-serine/threonine phosphatase {ECO:0000256|ARBA:ARBA00013081}; EC=3.1.3.16 {ECO:0000256|ARBA:ARBA00013081}; Flags: Fragment;	Serine/threonine protein phosphatase	GO:0005634,nucleus; GO:0046872,metal ion binding; GO:0017018,myosin phosphatase activity; GO:0004722,protein serine/threonine phosphatase activity; GO:0035970,peptidyl-threonine dephosphorylation; GO:0003674,molecular_function; GO:0005488,binding; GO:0043167,ion binding; GO:0043169,cation binding; GO:0003824,catalytic activity; GO:0004721,phosphoprotein phosphatase activity; GO:0016787,hydrolase …	Protein phosphatase 2C	--	--	--
Cluster-424.49	53.62	57.31	60.75	196.08	187.3	187.98	3015	3547	3355	10480	11731	9948	1.76423	0	0	up	2550	K08202 MFS transporter, OCT family, solute carrier family 22 (organic cation transporter), member 4/5 | (RefSeq) organic cation/carnitine transporter 4 (A)	--	organic cation/carnitine transporter 7 isoform X1 [Aegilops tauschii subsp. strangulata]	OCT7_ARATH RecName: Full=Organic cation/carnitine transporter 7; Short=AtOCT7;	A0A453LQG0_AEGTS RecName: Full=MFS domain-containing protein {ECO:0000259|PROSITE:PS50850};	Synaptic vesicle transporter SV2 (major facilitator superfamily)	GO:0016021,integral component of membrane; GO:0005886,plasma membrane; GO:0005524,ATP binding; GO:0090417,N-methylnicotinate transmembrane transporter activity; GO:0090416,nicotinate transmembrane transporter activity; GO:2001143,N-methylnicotinate transport; GO:2001142,nicotinate transport; GO:0000166,nucleotide binding; GO:0003674,molecular_function; GO:0005488,binding; GO:0017076,purine nucleo…	Sugar (and other) transporter	--	--	--
Cluster-43187.0	7.66	6.9	6.39	169.14	160.23	165.23	114	112	89	2350	2628	2261	4.58912	0	0	up	1014	--	--	hypothetical protein ZWY2020_022025 [Hordeum vulgare]	PMEI8_ORYSJ RecName: Full=Pectinesterase inhibitor 8 {ECO:0000305}; AltName: Full=Pectin methylesterase inhibitor 8 {ECO:0000303|PubMed:26874295}; Short=OsPMEI8 {ECO:0000303|PubMed:26874295}; Flags: Precursor;	A0A8I6Y3V1_HORVV RecName: Full=PMEI domain-containing protein {ECO:0000259|SMART:SM00856};	--	GO:0048046,apoplast; GO:0046910,pectinesterase inhibitor activity; GO:0003674,molecular_function; GO:0004857,enzyme inhibitor activity; GO:0030234,enzyme regulator activity; GO:0098772,molecular function regulator activity; GO:0005575,cellular_component; GO:0005576,extracellular region; GO:0110165,cellular anatomical entity	Plant invertase/pectin methylesterase inhibitor	--	--	--
Cluster-43365.4	33.65	32.3	32.61	362.79	369.35	395.38	258	267	245	2589	3085	2744	3.51666	0	0	up	612	--	--	uncharacterized protein LOC119301096 [Triticum dicoccoides]	--	A0A452XQK0_AEGTS SubName: Full=Uncharacterized protein {ECO:0000313|EnsemblPlants:AET1Gv20113100.1};	--	GO:0016021,integral component of membrane; GO:0005575,cellular_component; GO:0016020,membrane; GO:0031224,intrinsic component of membrane; GO:0110165,cellular anatomical entity	--	--	--	--
Cluster-4393.1	50.39	52.35	48.32	280.48	285.47	272.15	1196	1364	1134	6233	7469	5979	2.47798	0	0	up	1708	K00521 ferric-chelate reductase [EC:1.16.1.7] | (RefSeq) ferric reduction oxidase 7, chloroplastic-like (A)	--	NAC domain-containing protein 2-like [Hordeum vulgare subsp. vulgare]	NAC2_ORYSJ RecName: Full=NAC domain-containing protein 2 {ECO:0000303|PubMed:15029955}; Short=ONAC002 {ECO:0000303|PubMed:15029955}; AltName: Full=OsNAC19 {ECO:0000303|Ref.1}; AltName: Full=Protein STRESS-RESPONSIVE NAC 1 {ECO:0000303|PubMed:16924117};	F6MEL2_HORVV SubName: Full=Stress-induced transcription factor SNAC1 {ECO:0000313|EMBL:AEG21060.1};	--	GO:0005634,nucleus; GO:0042803,protein homodimerization activity; GO:0043565,sequence-specific DNA binding; GO:1901002,positive regulation of response to salt stress; GO:1902584,positive regulation of response to water deprivation; GO:0006355,regulation of DNA-templated transcription; GO:0003674,molecular_function; GO:0005488,binding; GO:0005515,protein binding; GO:0042802,identical protein bindi…	--	NAC	TF	NAC
Cluster-43939.11	211.51	219.84	226.97	81.81	79.77	83.1	5889	6658	6146	2066	2464	2144	-1.42016	0	0	down	1417	K22439 tricetin 3',4',5'-O-trimethyltransferase [EC:2.1.1.169] | (RefSeq) tricetin 3',4',5'-O-trimethyltransferase (A)	--	tricetin 3',4',5'-O-trimethyltransferase [Triticum aestivum]	FOMT2_WHEAT RecName: Full=Tricetin 3',4',5'-O-trimethyltransferase; Short=TaOMT2; EC=2.1.1.169; AltName: Full=Caffeic acid 3-O-methyltransferase; Short=TaCM; AltName: Full=Flavone O-methyltransferase 2;	W5D5N4_WHEAT SubName: Full=Uncharacterized protein {ECO:0000313|EMBL:CDM87233.1, ECO:0000313|EnsemblPlants:TraesCS3B02G612000.1};	Hydroxyindole-O-methyltransferase and related SAM-dependent methyltransferases	GO:0008171,O-methyltransferase activity; GO:0046983,protein dimerization activity; GO:0008757,S-adenosylmethionine-dependent methyltransferase activity; GO:0019438,aromatic compound biosynthetic process; GO:0009813,flavonoid biosynthetic process; GO:0009809,lignin biosynthetic process; GO:0032259,methylation; GO:0003674,molecular_function; GO:0003824,catalytic activity; GO:0008168,methyltransfera…	O-methyltransferase domain	--	--	--
Cluster-45554.11	71.18	66.42	62.93	469.58	462.03	495.62	2044	2093	1775	12776	14728	13316	2.85493	0	0	up	1452	--	--	hypothetical protein CFC21_001673 [Triticum aestivum]	--	A0A446IUC3_TRITD SubName: Full=Uncharacterized protein {ECO:0000313|EMBL:VAH04437.1};	--	GO:0016021,integral component of membrane; GO:0005575,cellular_component; GO:0016020,membrane; GO:0031224,intrinsic component of membrane; GO:0110165,cellular anatomical entity	--	--	--	--
Cluster-45850.10	242.03	218.55	197.58	2883.73	2913.26	2932.47	155	142	125	1614	1883	1476	3.62127	0	0	up	293	--	--	chitinase CLP [Aegilops tauschii subsp. strangulata]	CLP_ORYSJ RecName: Full=Chitinase CLP {ECO:0000303|PubMed:23331415}; Short=OsCLP {ECO:0000303|PubMed:23331415}; EC=3.2.1.14 {ECO:0000269|PubMed:23331415}; AltName: Full=Chitinase-like protein {ECO:0000303|PubMed:23331415}; Flags: Precursor;	A0A453DTK4_AEGTS RecName: Full=Peptidase A1 domain-containing protein {ECO:0000259|PROSITE:PS51767};	--	GO:0048046,apoplast; GO:0004190,aspartic-type endopeptidase activity; GO:0008843,endochitinase activity; GO:0006032,chitin catabolic process; GO:0050832,defense response to fungus; GO:0000272,polysaccharide catabolic process; GO:0006508,proteolysis; GO:0040008,regulation of growth; GO:0048364,root development; GO:0048367,shoot system development; GO:0003674,molecular_function; GO:0003824,catalyti…	--	--	--	--
Cluster-45850.26	49.19	50.73	45.6	746.24	747.79	749.76	1123	1269	1022	16113	18915	15963	3.96721	0	0	up	1217	--	--	chitinase CLP-like [Hordeum vulgare subsp. vulgare]	CLP_ORYSJ RecName: Full=Chitinase CLP {ECO:0000303|PubMed:23331415}; Short=OsCLP {ECO:0000303|PubMed:23331415}; EC=3.2.1.14 {ECO:0000269|PubMed:23331415}; AltName: Full=Chitinase-like protein {ECO:0000303|PubMed:23331415}; Flags: Precursor;	A0A446PAV6_TRITD RecName: Full=Peptidase A1 domain-containing protein {ECO:0000259|PROSITE:PS51767};	Aspartyl protease	GO:0048046,apoplast; GO:0004190,aspartic-type endopeptidase activity; GO:0008843,endochitinase activity; GO:0006032,chitin catabolic process; GO:0050832,defense response to fungus; GO:0000272,polysaccharide catabolic process; GO:0006508,proteolysis; GO:0040008,regulation of growth; GO:0048364,root development; GO:0048367,shoot system development; GO:0003674,molecular_function; GO:0003824,catalyti…	Xylanase inhibitor C-terminal	--	--	--
Cluster-45980.4	174.23	146.93	149.43	1425.4	1455.25	1416.13	3594	3315	3024	27718	33140	27133	3.20733	0	0	up	1210	--	--	UPF0098 protein CPn_0877/CP_0992/CPj0877/CpB0906-like [Lolium rigidum]	--	A0A452ZBP4_AEGTS SubName: Full=Uncharacterized protein {ECO:0000313|EnsemblPlants:AET1Gv20703200.2};	--	--	Phosphatidylethanolamine-binding protein	--	--	--
Cluster-4711.11	10.33	10.56	10.79	127.84	128.63	133.9	204	228	209	2387	2814	2463	3.646	0	0	up	1095	K09291 nucleoprotein TPR | (RefSeq) LOW QUALITY PROTEIN: nuclear-pore anchor (A)	ko03013: Nucleocytoplasmic transport	GEM-like protein 5 [Hordeum vulgare subsp. vulgare]	GEML5_ARATH RecName: Full=GEM-like protein 5;	A0A8I6XZ03_HORVV RecName: Full=GRAM domain-containing protein {ECO:0000259|SMART:SM00568};	--	GO:0009536,plastid; GO:0009793,embryo development ending in seed dormancy; GO:0098755,maintenance of seed dormancy by absisic acid; GO:0010029,regulation of seed germination; GO:0009845,seed germination; GO:0000003,reproduction; GO:0003006,developmental process involved in reproduction; GO:0007275,multicellular organism development; GO:0008150,biological_process; GO:0009790,embryo development; GO…	GRAM domain	--	--	--
Cluster-47352.0	6.13	4.53	4.92	174.12	158.26	174.91	203	165	160	5470	5825	5430	5.05294	0	0	up	1628	--	--	uncharacterized protein LOC109741039 [Aegilops tauschii subsp. strangulata]	--	A0A453F5J1_AEGTS SubName: Full=Uncharacterized protein {ECO:0000313|EnsemblPlants:AET3Gv20579200.1};	--	--	--	--	--	--
Cluster-48510.2	105.07	105.87	113.57	331.01	333.35	331.4	3641	4108	3950	11052	13117	10973	1.6513	0	0	up	1722	K09060 plant G-box-binding factor | (RefSeq) bZIP transcription factor 16 (A)	--	UV-B-induced protein At3g17800, chloroplastic-like [Hordeum vulgare subsp. vulgare]	UVB31_ARATH RecName: Full=UV-B-induced protein At3g17800, chloroplastic {ECO:0000305}; Flags: Precursor;	F2CQJ7_HORVV SubName: Full=Predicted protein {ECO:0000313|EMBL:BAJ85118.1};	--	GO:0009507,chloroplast; GO:0010193,response to ozone; GO:0010224,response to UV-B; GO:0009611,response to wounding; GO:0000302,response to reactive oxygen species; GO:0006950,response to stress; GO:0006979,response to oxidative stress; GO:0008150,biological_process; GO:0010035,response to inorganic substance; GO:0042221,response to chemical; GO:0050896,response to stimulus; GO:1901700,response to…	Protein of unknown function (DUF760)	--	--	--
Cluster-50838.8	23.64	23.3	23.07	83.79	83.43	80.81	2447	2658	2346	8256	9635	7895	1.85571	0	0	up	4437	K10144 RING finger and CHY zinc finger domain-containing protein 1 [EC:2.3.2.27] | (RefSeq) probable E3 ubiquitin-protein ligase RZFP34 (A)	ko04120: Ubiquitin mediated proteolysis	hypothetical protein CFC21_034777 [Triticum aestivum]	ZFP34_ORYSJ RecName: Full=Probable E3 ubiquitin-protein ligase RZFP34 {ECO:0000305}; EC=2.3.2.27 {ECO:0000305}; AltName: Full=OsRFP1 {ECO:0000303|Ref.1}; AltName: Full=RING zinc-finger protein 34 {ECO:0000303|PubMed:25002225}; Short=OsRZFP34 {ECO:0000303|PubMed:25002225};	A0A446NP91_TRITD SubName: Full=Uncharacterized protein {ECO:0000313|EMBL:VAH63921.1};	Zn-finger protein	GO:0005634,nucleus; GO:0061630,ubiquitin protein ligase activity; GO:0008270,zinc ion binding; GO:0016567,protein ubiquitination; GO:0006511,ubiquitin-dependent protein catabolic process; GO:0003674,molecular_function; GO:0003824,catalytic activity; GO:0004842,ubiquitin-protein transferase activity; GO:0016740,transferase activity; GO:0019787,ubiquitin-like protein transferase activity; GO:006165…	CHY zinc finger	--	--	--
Cluster-50838.9	15.51	16.38	16.22	56.22	56.74	53.99	796	925	818	2742	3243	2607	1.82336	0	0	up	2355	K10144 RING finger and CHY zinc finger domain-containing protein 1 [EC:2.3.2.27] | (RefSeq) probable E3 ubiquitin-protein ligase RZFP34 (A)	ko04120: Ubiquitin mediated proteolysis	hypothetical protein CFC21_048058 [Triticum aestivum]	ZFP34_ORYSJ RecName: Full=Probable E3 ubiquitin-protein ligase RZFP34 {ECO:0000305}; EC=2.3.2.27 {ECO:0000305}; AltName: Full=OsRFP1 {ECO:0000303|Ref.1}; AltName: Full=RING zinc-finger protein 34 {ECO:0000303|PubMed:25002225}; Short=OsRZFP34 {ECO:0000303|PubMed:25002225};	A0A453FI69_AEGTS SubName: Full=Uncharacterized protein {ECO:0000313|EnsemblPlants:AET3Gv20682500.28};	Zn-finger protein	GO:0005634,nucleus; GO:0061630,ubiquitin protein ligase activity; GO:0008270,zinc ion binding; GO:0016567,protein ubiquitination; GO:0006511,ubiquitin-dependent protein catabolic process; GO:0003674,molecular_function; GO:0003824,catalytic activity; GO:0004842,ubiquitin-protein transferase activity; GO:0016740,transferase activity; GO:0019787,ubiquitin-like protein transferase activity; GO:006165…	CHY zinc finger	--	--	--
Cluster-512.10	10.47	51.43	13.61	166.8	237.59	170.64	839	1001	782	7045	8544	6856	3.16287	0	0	up	3688	K01206 alpha-L-fucosidase [EC:3.2.1.51] | (RefSeq) FXG1; alpha-fucosidase 1 (A)	ko00511: Other glycan degradation	unnamed protein product [Triticum turgidum subsp. durum]	ACHE_MAIZE RecName: Full=GDSL esterase/lipase ACHE {ECO:0000305}; EC=3.1.1.- {ECO:0000269|PubMed:15980188}; AltName: Full=Acetylcholinesterase {ECO:0000303|PubMed:15980188}; Short=AChE {ECO:0000303|PubMed:15980188}; Flags: Precursor;	A0A446N082_TRITD SubName: Full=Uncharacterized protein {ECO:0000313|EMBL:VAH55469.1};	--	GO:0005576,extracellular region; GO:0052689,carboxylic ester hydrolase activity; GO:0006581,acetylcholine catabolic process; GO:0016042,lipid catabolic process; GO:0003674,molecular_function; GO:0003824,catalytic activity; GO:0016787,hydrolase activity; GO:0016788,hydrolase activity, acting on ester bonds; GO:0001505,regulation of neurotransmitter levels; GO:0006807,nitrogen compound metabolic pr…	GDSL-like Lipase/Acylhydrolase	--	--	--
Cluster-52856.8	52.48	43.55	52.76	609.22	616.02	603.16	629	597	655	7198	8542	6907	3.65032	0	0	up	965	K03686 molecular chaperone DnaJ | (RefSeq) uncharacterized protein LOC109742333 (A)	--	protein tumorous imaginal discs, mitochondrial-like [Triticum aestivum]	DNAJ8_ARATH RecName: Full=Chaperone protein dnaJ 8, chloroplastic; Short=AtDjC8; Short=AtJ8; Flags: Precursor;	A0A453T4V6_AEGTS RecName: Full=J domain-containing protein {ECO:0000259|PROSITE:PS50076};	Molecular chaperone (DnaJ superfamily)	GO:0009507,chloroplast; GO:0009570,chloroplast stroma; GO:0005634,nucleus; GO:0009416,response to light stimulus; GO:0008150,biological_process; GO:0009314,response to radiation; GO:0009628,response to abiotic stimulus; GO:0050896,response to stimulus; GO:0005575,cellular_component; GO:0005622,intracellular anatomical structure; GO:0005737,cytoplasm; GO:0009536,plastid; GO:0043226,organelle; GO:0…	DnaJ domain	--	--	--
Cluster-57551.0	7.12	7.21	5.69	132.27	136.56	142.71	123	129	84	1965	2331	2040	4.30418	0	0	up	1920	K17508 protein phosphatase PTC7 [EC:3.1.3.16] | (RefSeq) putative protein phosphatase 2C 23 (A)	--	outer envelope pore protein 16-2, chloroplastic-like [Triticum aestivum]	OP162_ARATH RecName: Full=Outer envelope pore protein 16-2, chloroplastic; AltName: Full=Chloroplastic outer envelope pore protein of 16 kDa 2; Short=AtOEP16-2; Short=OEP16-2; AltName: Full=Outer plastid envelope protein 16-S; Short=AtOEP16-S; Short=Seeds outer plastid envelope protein 16;	A0A446TUX5_TRITD SubName: Full=Uncharacterized protein {ECO:0000313|EMBL:VAI27164.1};	--	GO:0031359,integral component of chloroplast outer membrane; GO:0009527,plastid outer membrane; GO:0046930,pore complex; GO:0015171,amino acid transmembrane transporter activity; GO:0015288,porin activity; GO:0042803,protein homodimerization activity; GO:0006811,ion transport; GO:0003674,molecular_function; GO:0005215,transporter activity; GO:0005342,organic acid transmembrane transporter activit…	--	--	--	--
Cluster-60019.6	8.59	11.5	10.39	150.47	145.82	142.59	93	131	109	1507	1701	1400	3.85737	0	0	up	946	K10752 histone-binding protein RBBP4 | (RefSeq) LOW QUALITY PROTEIN: WD-40 repeat-containing protein MSI3 (A)	ko03082: ATP-dependent chromatin remodeling; ko03083: Polycomb repressive complex	heavy metal-associated isoprenylated plant protein 27-like [Triticum dicoccoides]	HIP27_ARATH RecName: Full=Heavy metal-associated isoprenylated plant protein 27 {ECO:0000303|PubMed:21072340, ECO:0000303|PubMed:23368984}; Short=AtHIP27 {ECO:0000303|PubMed:23368984}; Short=AtHIPP27 {ECO:0000303|PubMed:21072340, ECO:0000303|PubMed:23368984}; Flags: Precursor;	W5GH09_WHEAT RecName: Full=HMA domain-containing protein {ECO:0000259|Pfam:PF00403};	Copper chaperone	GO:0005886,plasma membrane; GO:0046872,metal ion binding; GO:0050896,response to stimulus; GO:0003674,molecular_function; GO:0005488,binding; GO:0043167,ion binding; GO:0043169,cation binding; GO:0008150,biological_process; GO:0005575,cellular_component; GO:0016020,membrane; GO:0071944,cell periphery; GO:0110165,cellular anatomical entity	Heavy-metal-associated domain	--	--	--
Cluster-60724.4	30.18	31.86	30.61	82.3	83.06	79.59	2178	2543	2178	5660	6692	5427	1.43101	0	0	up	3209	K00276 primary-amine oxidase [EC:1.4.3.21] | (RefSeq) copper methylamine oxidase-like (A)	ko00260: Glycine, serine and threonine metabolism; ko00350: Tyrosine metabolism; ko00360: Phenylalanine metabolism; ko00410: beta-Alanine metabolism; ko00950: Isoquinoline alkaloid biosynthesis; ko00960: Tropane, piperidine and pyridine alkaloid biosynthesis; ko01100: Metabolic pathways; ko01110: Biosynthesis of secondary metabolites	copper methylamine oxidase-like [Hordeum vulgare subsp. vulgare]	CUAOZ_ARATH RecName: Full=Amine oxidase [copper-containing] zeta, peroxisomal {ECO:0000303|PubMed:31862580}; Short=AtCuAO1 {ECO:0000303|PubMed:24287136}; Short=AtCuAO3 {ECO:0000303|PubMed:23915037}; Short=AtCuAOzeta {ECO:0000303|PubMed:31862580}; Short=Copper amine oxidase 3 {ECO:0000303|PubMed:23915037}; EC=1.4.3.21 {ECO:0000269|PubMed:23915037, ECO:0000269|PubMed:24287136};	A0A8I6WQM2_HORVV RecName: Full=Amine oxidase {ECO:0000256|RuleBase:RU000672}; EC=1.4.3.- {ECO:0000256|RuleBase:RU000672};	Copper amine oxidase	GO:0005829,cytosol; GO:0005777,peroxisome; GO:0052595,aliphatic amine oxidase activity; GO:0052594,aminoacetone:oxygen oxidoreductase(deaminating) activity; GO:0005507,copper ion binding; GO:0052596,phenethylamine:oxygen oxidoreductase (deaminating) activity; GO:0008131,primary amine oxidase activity; GO:0048038,quinone binding; GO:0052593,tryptamine:oxygen oxidoreductase (deaminating) activity; …	Copper amine oxidase, enzyme domain	--	--	--
Cluster-64250.7	19.51	19.79	22.47	143.35	143.58	147.68	847	928	907	5907	6933	6021	2.87964	0	0	up	2038	--	--	uncharacterized protein LOC127303264 [Lolium perenne]	--	A0A8I6Y312_HORVV RecName: Full=zf-RVT domain-containing protein {ECO:0000259|Pfam:PF13966};	--	--	--	--	--	--
Cluster-65072.0	591.5	606.7	570.23	191.87	192.8	187.01	6359	7091	6021	1933	2274	1843	-1.62113	0	0	down	735	K02914 large subunit ribosomal protein L34 | (RefSeq) 50S ribosomal protein L34, chloroplastic-like (A)	ko03010: Ribosome	50S ribosomal protein L34, chloroplastic-like [Triticum dicoccoides]	RK34_SPIOL RecName: Full=50S ribosomal protein L34, chloroplastic {ECO:0000303|PubMed:10874046}; AltName: Full=CL34; AltName: Full=Chloroplastic large ribosomal subunit protein bL34c {ECO:0000303|PubMed:28007896}; Flags: Precursor;	W5CV89_WHEAT SubName: Full=(bread wheat) hypothetical protein {ECO:0000313|EMBL:CDJ26547.1};	--	GO:0009507,chloroplast; GO:0005762,mitochondrial large ribosomal subunit; GO:0019843,rRNA binding; GO:0003735,structural constituent of ribosome; GO:0006412,translation; GO:0003674,molecular_function; GO:0003676,nucleic acid binding; GO:0003723,RNA binding; GO:0005488,binding; GO:0097159,organic cyclic compound binding; GO:1901363,heterocyclic compound binding; GO:0005198,structural molecule acti…	Ribosomal protein L34	--	--	--
Cluster-6516.69	12.08	12.18	12.1	66.49	66.6	63.75	372	412	366	1940	2278	1838	2.46111	0	0	up	1535	K21351 sucrose:sucrose fructosyltransferase [EC:2.4.1.99] | (RefSeq) sucrose:sucrose 1-fructosyltransferase-like (A)	--	unnamed protein product [Triticum turgidum subsp. durum]	SST_FESAR RecName: Full=Sucrose:sucrose 1-fructosyltransferase; EC=2.4.1.99; AltName: Full=Sucrose 1(F)-fructosyltransferase; AltName: Full=Sucrose:sucrose 1(F)-beta-D-fructosyltransferase; Flags: Precursor;	A0A446V0Z1_TRITD SubName: Full=Uncharacterized protein {ECO:0000313|EMBL:VAI41542.1};	Beta-fructofuranosidase (invertase)	GO:0005773,vacuole; GO:0004564,beta-fructofuranosidase activity; GO:0050306,sucrose 1F-fructosyltransferase activity; GO:0005975,carbohydrate metabolic process; GO:0003674,molecular_function; GO:0003824,catalytic activity; GO:0004553,hydrolase activity, hydrolyzing O-glycosyl compounds; GO:0016787,hydrolase activity; GO:0016798,hydrolase activity, acting on glycosyl bonds; GO:0016740,transferase …	Glycosyl hydrolases family 32 N-terminal domain	--	--	--
Cluster-6516.9	4.27	4.45	4.69	111.43	108.48	108.99	158	181	170	3913	4463	3784	4.64445	0	0	up	1783	K21351 sucrose:sucrose fructosyltransferase [EC:2.4.1.99] | (RefSeq) sucrose:sucrose 1-fructosyltransferase-like (A)	--	sucrose:sucrose 1-fructosyltransferase-like [Triticum dicoccoides]	SST_FESAR RecName: Full=Sucrose:sucrose 1-fructosyltransferase; EC=2.4.1.99; AltName: Full=Sucrose 1(F)-fructosyltransferase; AltName: Full=Sucrose:sucrose 1(F)-beta-D-fructosyltransferase; Flags: Precursor;	A0A446RMB2_TRITD SubName: Full=Uncharacterized protein {ECO:0000313|EMBL:VAH99998.1};	Beta-fructofuranosidase (invertase)	GO:0005773,vacuole; GO:0004564,beta-fructofuranosidase activity; GO:0050306,sucrose 1F-fructosyltransferase activity; GO:0005975,carbohydrate metabolic process; GO:0003674,molecular_function; GO:0003824,catalytic activity; GO:0004553,hydrolase activity, hydrolyzing O-glycosyl compounds; GO:0016787,hydrolase activity; GO:0016798,hydrolase activity, acting on glycosyl bonds; GO:0016740,transferase …	Glycosyl hydrolases family 32 N-terminal domain	--	--	--
Cluster-6593.2	6.51	8.82	6.85	107.02	116.19	117.23	111	164	114	1722	2185	1853	3.95563	0	0	up	1064	--	--	hypothetical protein TRIUR3_20993 [Triticum urartu]	--	M8A1P6_TRIUA SubName: Full=Uncharacterized protein {ECO:0000313|EMBL:EMS66252.1, ECO:0000313|EnsemblPlants:TRIUR3_20993-P1};	--	--	--	--	--	--
Cluster-65941.4	45.54	45.1	43.67	1126.58	1069	1135.2	105	109	99	2336	2583	2213	4.57683	0	0	up	481	K10950 ERO1-like protein alpha [EC:1.8.4.-] | (RefSeq) endoplasmic reticulum oxidoreductin-2-like (A)	ko04141: Protein processing in endoplasmic reticulum	dehydrin Rab15-like isoform X2 [Triticum dicoccoides]	DHR15_WHEAT RecName: Full=Dehydrin Rab15;	A0A453M023_AEGTS SubName: Full=Uncharacterized protein {ECO:0000313|EnsemblPlants:AET5Gv20990000.2};	--	GO:0009631,cold acclimation; GO:0009737,response to abscisic acid; GO:0009414,response to water deprivation; GO:0006950,response to stress; GO:0008150,biological_process; GO:0009266,response to temperature stimulus; GO:0009409,response to cold; GO:0009628,response to abiotic stimulus; GO:0050896,response to stimulus; GO:0009719,response to endogenous stimulus; GO:0009725,response to hormone; GO:0…	Dehydrin	--	--	--
Cluster-65941.5	44.6	42.06	47.03	775.27	776.88	835.06	111	111	116	1748	2036	1763	4.10215	0	0	up	486	K10950 ERO1-like protein alpha [EC:1.8.4.-] | (RefSeq) endoplasmic reticulum oxidoreductin-2-like (A)	ko04141: Protein processing in endoplasmic reticulum	dehydrin Rab15-like isoform X2 [Triticum dicoccoides]	DHR15_WHEAT RecName: Full=Dehydrin Rab15;	A0A453M023_AEGTS SubName: Full=Uncharacterized protein {ECO:0000313|EnsemblPlants:AET5Gv20990000.2};	--	GO:0009631,cold acclimation; GO:0009737,response to abscisic acid; GO:0009414,response to water deprivation; GO:0006950,response to stress; GO:0008150,biological_process; GO:0009266,response to temperature stimulus; GO:0009409,response to cold; GO:0009628,response to abiotic stimulus; GO:0050896,response to stimulus; GO:0009719,response to endogenous stimulus; GO:0009725,response to hormone; GO:0…	--	--	--	--
Cluster-68345.0	539.01	529.86	521.95	3965.66	4028.66	3945.72	3622	3777	3445	24543	29231	23810	2.90181	0	0	up	574	K10950 ERO1-like protein alpha [EC:1.8.4.-] | (RefSeq) endoplasmic reticulum oxidoreductin-2-like (A)	ko04141: Protein processing in endoplasmic reticulum	Dhn3, partial [Secale cereale]	DHN3_HORVU RecName: Full=Dehydrin DHN3; AltName: Full=B17;	F1DB88_SECCE SubName: Full=Dhn3 {ECO:0000313|EMBL:ADX32481.1}; Flags: Fragment;	--	GO:0009415,response to water; GO:0001101,response to acid chemical; GO:0008150,biological_process; GO:0009628,response to abiotic stimulus; GO:0010035,response to inorganic substance; GO:0042221,response to chemical; GO:0050896,response to stimulus; GO:1901700,response to oxygen-containing compound	Dehydrin	--	--	--
Cluster-68345.1	98.8	100.17	97.61	1065.42	1077.02	1064.89	641	700	622	6415	7586	6211	3.42854	0	0	up	565	K10950 ERO1-like protein alpha [EC:1.8.4.-] | (RefSeq) endoplasmic reticulum oxidoreductin-2-like (A)	ko04141: Protein processing in endoplasmic reticulum	Dhn3, partial [Secale cereale]	DHN3_HORVU RecName: Full=Dehydrin DHN3; AltName: Full=B17;	F1DB88_SECCE SubName: Full=Dhn3 {ECO:0000313|EMBL:ADX32481.1}; Flags: Fragment;	--	GO:0009415,response to water; GO:0001101,response to acid chemical; GO:0008150,biological_process; GO:0009628,response to abiotic stimulus; GO:0010035,response to inorganic substance; GO:0042221,response to chemical; GO:0050896,response to stimulus; GO:1901700,response to oxygen-containing compound	--	--	--	--
Cluster-69172.5	35.09	36.09	37.08	112.89	108.62	114	1727	1947	1784	5259	5936	5269	1.66048	0	0	up	2457	K00294 1-pyrroline-5-carboxylate dehydrogenase [EC:1.2.1.88] | (RefSeq) probable aldehyde dehydrogenase (A)	ko00250: Alanine, aspartate and glutamate metabolism; ko00330: Arginine and proline metabolism; ko01100: Metabolic pathways	probable aldehyde dehydrogenase [Triticum dicoccoides]	ALDH_LINUS RecName: Full=Probable aldehyde dehydrogenase; EC=1.2.1.3; AltName: Full=Flax-inducible sequence 1;	A0A452ZP04_AEGTS RecName: Full=Aldedh domain-containing protein {ECO:0000259|Pfam:PF00171};	Aldehyde dehydrogenase	GO:0004029,aldehyde dehydrogenase (NAD+) activity; GO:0043878,glyceraldehyde-3-phosphate dehydrogenase (NAD+) (non-phosphorylating) activity; GO:0003674,molecular_function; GO:0003824,catalytic activity; GO:0004030,aldehyde dehydrogenase [NAD(P)+] activity; GO:0016491,oxidoreductase activity; GO:0016620,oxidoreductase activity, acting on the aldehyde or oxo group of donors, NAD or NADP as accepto…	Aldehyde dehydrogenase family	--	--	--
Cluster-69316.2	37.82	34.7	33.15	262.35	258.15	254.33	1658	1658	1428	10749	12431	10274	2.88192	0	0	up	2618	K00422 polyphenol oxidase [EC:1.10.3.1] | (RefSeq) polyphenol oxidase, chloroplastic-like (A)	ko00350: Tyrosine metabolism; ko00950: Isoquinoline alkaloid biosynthesis; ko01100: Metabolic pathways; ko01110: Biosynthesis of secondary metabolites	polyphenol oxidase, chloroplastic-like [Triticum dicoccoides]	PPO_MALDO RecName: Full=Polyphenol oxidase, chloroplastic; Short=PPO; EC=1.10.3.1; AltName: Full=Catechol oxidase; Flags: Precursor;	A0A446MQK1_TRITD SubName: Full=Uncharacterized protein {ECO:0000313|EMBL:VAH52097.1};	--	GO:0009543,chloroplast thylakoid lumen; GO:0004097,catechol oxidase activity; GO:0046872,metal ion binding; GO:0046148,pigment biosynthetic process; GO:0003674,molecular_function; GO:0003824,catalytic activity; GO:0004497,monooxygenase activity; GO:0016491,oxidoreductase activity; GO:0016679,oxidoreductase activity, acting on diphenols and related substances as donors; GO:0016682,oxidoreductase a…	Common central domain of tyrosinase	--	--	--
Cluster-70070.2	847.84	821.41	779.77	169.73	173	185.47	9061	9555	8197	1702	2031	1819	-2.20557	0	0	down	764	--	--	hypothetical protein ZWY2020_012867 [Hordeum vulgare]	NLTP3_ORYSI RecName: Full=Non-specific lipid-transfer protein 3; Short=LTP 3; Flags: Precursor;	A0A453D1A7_AEGTS RecName: Full=Non-specific lipid-transfer protein {ECO:0000256|RuleBase:RU000628};	--	GO:0008289,lipid binding; GO:0006952,defense response; GO:0006869,lipid transport; GO:0003674,molecular_function; GO:0005488,binding; GO:0006950,response to stress; GO:0008150,biological_process; GO:0050896,response to stimulus; GO:0006810,transport; GO:0010876,lipid localization; GO:0033036,macromolecule localization; GO:0051179,localization; GO:0051234,establishment of localization; GO:0071702,…	Protease inhibitor/seed storage/LTP family	--	--	--
Cluster-70453.0	15.92	16.86	14.01	188.55	183.87	206.17	207	239	179	2305	2632	2472	3.63804	0	0	up	825	--	--	late embryogenesis abundant protein Lea14-A [Aegilops tauschii subsp. strangulata]	LEA14_GOSHI RecName: Full=Late embryogenesis abundant protein Lea14-A;	M7Z7Q1_TRIUA SubName: Full=Late embryogenesis abundant protein Lea14-A {ECO:0000313|EMBL:EMS55576.1, ECO:0000313|EnsemblPlants:TRIUR3_26240-P1};	--	GO:0009269,response to desiccation; GO:0001101,response to acid chemical; GO:0006950,response to stress; GO:0008150,biological_process; GO:0009414,response to water deprivation; GO:0009415,response to water; GO:0009628,response to abiotic stimulus; GO:0010035,response to inorganic substance; GO:0042221,response to chemical; GO:0050896,response to stimulus; GO:1901700,response to oxygen-containing…	Late embryogenesis abundant protein	--	--	--
Cluster-70850.0	3.33	4.75	3.28	247.55	235.03	249.07	31	48	30	2157	2397	2118	6.00442	0	0	up	678	K09495 T-complex protein 1 subunit gamma | (RefSeq) T-complex protein 1 subunit gamma-like (A)	--	SEED MATURATION PROTEIN 1 [Aegilops tauschii subsp. strangulata]	SMP1_ARATH RecName: Full=SEED MATURATION PROTEIN 1 {ECO:0000303|PubMed:20870712}; AltName: Full=Late embryogenesis abundant protein SMP1 {ECO:0000303|PubMed:22837651};	R7WGD7_AEGTA SubName: Full=Uncharacterized protein {ECO:0000313|EMBL:EMT20079.1, ECO:0000313|EnsemblPlants:EMT20079};	--	GO:0044183,protein folding chaperone; GO:0010231,maintenance of seed dormancy; GO:0009408,response to heat; GO:0010162,seed dormancy process; GO:0003674,molecular_function; GO:0000003,reproduction; GO:0003006,developmental process involved in reproduction; GO:0007275,multicellular organism development; GO:0008150,biological_process; GO:0009791,post-embryonic development; GO:0010154,fruit developm…	Unstructured region C-term to UIM in Ataxin3	--	--	--
Cluster-72819.0	112.54	112.91	112.1	360.64	351.31	361.67	2967	3265	2902	9002	10273	8910	1.69238	0	0	up	1358	--	--	ricin B-like lectin R40G3 [Triticum aestivum]	40G3_ORYSJ RecName: Full=Ricin B-like lectin R40G3 {ECO:0000305}; AltName: Full=Osr40g3 {ECO:0000303|PubMed:9265787};	A0A3B6FKP0_WHEAT SubName: Full=Uncharacterized protein {ECO:0000313|EnsemblPlants:TraesCS3B02G093100.2};	--	GO:0030246,carbohydrate binding; GO:0003674,molecular_function; GO:0005488,binding	Ricin-type beta-trefoil lectin domain-like	--	--	--
Cluster-73704.0	106.64	146.31	124.97	1073.1	1064.48	1187.04	792	808	662	4957	5542	4751	2.8198	0	0	up	1374	K00799 glutathione S-transferase [EC:2.5.1.18] | (RefSeq) glutathione S-transferase U8-like (A)	ko00480: Glutathione metabolism; ko01100: Metabolic pathways	glutathione S-transferase U8 [Aegilops tauschii subsp. strangulata]	GSTX6_SOYBN RecName: Full=Probable glutathione S-transferase; EC=2.5.1.18; AltName: Full=G2-4; AltName: Full=Heat shock protein 26A;	M8C5Z8_AEGTA RecName: Full=Glutathione transferase {ECO:0000256|ARBA:ARBA00012452}; EC=2.5.1.18 {ECO:0000256|ARBA:ARBA00012452};	Glutathione S-transferase	GO:0005737,cytoplasm; GO:0004364,glutathione transferase activity; GO:0006749,glutathione metabolic process; GO:0009737,response to abscisic acid; GO:0009733,response to auxin; GO:0009735,response to cytokinin; GO:0009739,response to gibberellin; GO:0009408,response to heat; GO:0010038,response to metal ion; GO:0003674,molecular_function; GO:0003824,catalytic activity; GO:0016740,transferase acti…	Glutathione S-transferase, N-terminal domain	--	--	--
Cluster-77277.1	296.8	300.7	282.11	14016	14164.5	13940.9	1414	1531	1320	61380	72506	58685	5.56075	0	0	up	495	--	--	dehydrin 4 [Hordeum vulgare subsp. spontaneum]	DHN4_HORVU RecName: Full=Dehydrin DHN4; AltName: Full=B18;	A0A453PUM6_AEGTS SubName: Full=Uncharacterized protein {ECO:0000313|EnsemblPlants:AET6Gv20864900.5};	--	GO:0009415,response to water; GO:0001101,response to acid chemical; GO:0008150,biological_process; GO:0009628,response to abiotic stimulus; GO:0010035,response to inorganic substance; GO:0042221,response to chemical; GO:0050896,response to stimulus; GO:1901700,response to oxygen-containing compound	Dehydrin	--	--	--
Cluster-77277.10	34.42	35.34	33.49	441.17	432.2	408.26	164	180	157	1942	2224	1727	3.6199	0	0	up	496	--	--	dehydrin 7 [Hordeum vulgare subsp. spontaneum]	DHN3_HORVU RecName: Full=Dehydrin DHN3; AltName: Full=B17;	A0A453PUM6_AEGTS SubName: Full=Uncharacterized protein {ECO:0000313|EnsemblPlants:AET6Gv20864900.5};	--	GO:0009415,response to water; GO:0001101,response to acid chemical; GO:0008150,biological_process; GO:0009628,response to abiotic stimulus; GO:0010035,response to inorganic substance; GO:0042221,response to chemical; GO:0050896,response to stimulus; GO:1901700,response to oxygen-containing compound	Dehydrin	--	--	--
Cluster-77277.11	703.5	714.87	801.74	6399.31	6444.32	6257.96	3124	3367	3475	26007	30638	24430	3.08554	0	0	up	622	--	--	unnamed protein product [Triticum turgidum subsp. durum]	DHN3_HORVU RecName: Full=Dehydrin DHN3; AltName: Full=B17;	A0A446VRQ0_TRITD SubName: Full=Uncharacterized protein {ECO:0000313|EMBL:VAI50516.1};	--	GO:0009415,response to water; GO:0001101,response to acid chemical; GO:0008150,biological_process; GO:0009628,response to abiotic stimulus; GO:0010035,response to inorganic substance; GO:0042221,response to chemical; GO:0050896,response to stimulus; GO:1901700,response to oxygen-containing compound	--	--	--	--
Cluster-77277.14	796.67	873	817.47	10797.6	10411	10724.1	355	391	361	4156	4619	3677	3.5564	0	0	up	275	--	--	drought acclimation dehydrin WZY2, partial [Agropyron cristatum]	DHN3_HORVU RecName: Full=Dehydrin DHN3; AltName: Full=B17;	G1DJ94_AGRCR SubName: Full=Drought acclimation dehydrin WZY2 {ECO:0000313|EMBL:AEJ88293.1}; Flags: Fragment;	--	GO:0009415,response to water; GO:0001101,response to acid chemical; GO:0008150,biological_process; GO:0009628,response to abiotic stimulus; GO:0010035,response to inorganic substance; GO:0042221,response to chemical; GO:0050896,response to stimulus; GO:1901700,response to oxygen-containing compound	--	--	--	--
Cluster-77277.4	7.97	11.23	7.59	184.46	175.48	182.3	108	166	101	2352	2620	2281	4.34553	0	0	up	847	--	--	dehydrin DHN3-like [Aegilops tauschii subsp. strangulata]	DHN3_HORVU RecName: Full=Dehydrin DHN3; AltName: Full=B17;	A0A453PUM6_AEGTS SubName: Full=Uncharacterized protein {ECO:0000313|EnsemblPlants:AET6Gv20864900.5};	--	GO:0009415,response to water; GO:0001101,response to acid chemical; GO:0008150,biological_process; GO:0009628,response to abiotic stimulus; GO:0010035,response to inorganic substance; GO:0042221,response to chemical; GO:0050896,response to stimulus; GO:1901700,response to oxygen-containing compound	Dehydrin	--	--	--
Cluster-7751.4	228.51	221.09	210.43	814.67	790.7	813.99	6512	6913	5889	21990	25005	21697	1.89741	0	0	up	1443	K15032 mTERF domain-containing protein, mitochondrial | (RefSeq) transcription termination factor MTEF1, chloroplastic isoform X1 (A)	--	probable plastid-lipid-associated protein 2, chloroplastic [Triticum urartu]	PAP2_ORYSJ RecName: Full=Probable plastid-lipid-associated protein 2, chloroplastic; AltName: Full=Fibrillin-like protein 2; Flags: Precursor;	A0A446T016_TRITD RecName: Full=PAP_fibrillin domain-containing protein {ECO:0000259|Pfam:PF04755};	--	GO:0009507,chloroplast; GO:0005575,cellular_component; GO:0005622,intracellular anatomical structure; GO:0005737,cytoplasm; GO:0009536,plastid; GO:0043226,organelle; GO:0043227,membrane-bounded organelle; GO:0043229,intracellular organelle; GO:0043231,intracellular membrane-bounded organelle; GO:0110165,cellular anatomical entity	PAP_fibrillin	--	--	--
Cluster-79153.0	3.13	3.16	2.82	42.73	42.4	43.84	129	143	114	1670	1942	1695	3.84804	0	0	up	1949	--	--	uncharacterized protein LOC125517943 [Triticum urartu]	RGA2_SOLBU RecName: Full=Disease resistance protein RGA2; AltName: Full=Blight resistance protein RPI; AltName: Full=RGA2-blb;	A0A446XL77_TRITD SubName: Full=Uncharacterized protein {ECO:0000313|EMBL:VAI76916.1};	--	GO:0043531,ADP binding; GO:0005524,ATP binding; GO:0098542,defense response to other organism; GO:0000166,nucleotide binding; GO:0003674,molecular_function; GO:0005488,binding; GO:0017076,purine nucleotide binding; GO:0030554,adenyl nucleotide binding; GO:0032553,ribonucleotide binding; GO:0032555,purine ribonucleotide binding; GO:0032559,adenyl ribonucleotide binding; GO:0036094,small molecule b…	Rx N-terminal domain	--	--	--
Cluster-79877.38	35.19	31.32	33.61	212.52	208.45	202.66	600	584	563	3420	3929	3208	2.65852	0	0	up	987	K03283 heat shock 70kDa protein 1/6/8 | (RefSeq) heat shock cognate 70 kDa protein-like (A)	ko03040: Spliceosome; ko04141: Protein processing in endoplasmic reticulum; ko04144: Endocytosis	heat shock cognate 70 kDa protein-like [Triticum aestivum]	HS704_ARATH RecName: Full=Heat shock 70 kDa protein 4 {ECO:0000303|PubMed:11599561}; AltName: Full=Heat shock cognate 70 kDa protein 4 {ECO:0000303|PubMed:11402207}; AltName: Full=Heat shock cognate protein 70-4 {ECO:0000303|PubMed:11402207}; Short=AtHsc70-4 {ECO:0000303|PubMed:11402207}; AltName: Full=Heat shock protein 70-4 {ECO:0000303|PubMed:11599561}; Short=AtHsp70-4 {ECO:0000303|PubMed:1159…	A0A446S6P3_TRITD SubName: Full=Uncharacterized protein {ECO:0000313|EMBL:VAI06780.1};	Molecular chaperones HSP70/HSC70, HSP70 superfamily	GO:0005737,cytoplasm; GO:0005829,cytosol; GO:0005794,Golgi apparatus; GO:0005739,mitochondrion; GO:0005634,nucleus; GO:0009505,plant-type cell wall; GO:0000325,plant-type vacuole; GO:0005886,plasma membrane; GO:0005524,ATP binding; GO:0016887,ATP hydrolysis activity; GO:0140662,ATP-dependent protein folding chaperone; GO:0031072,heat shock protein binding; GO:0051787,misfolded protein binding; GO…	Hsp70 protein	--	--	--
Cluster-8021.6	12.32	12.96	13.83	139.61	135.37	132.21	226	262	243	2395	2702	2225	3.38995	0	0	up	1146	K18819 inositol 3-alpha-galactosyltransferase [EC:2.4.1.123] | (RefSeq) galactinol synthase 2-like (A)	ko00052: Galactose metabolism; ko01100: Metabolic pathways	galactinol synthase 2-like [Triticum dicoccoides]	GOLS2_ARATH RecName: Full=Galactinol synthase 2; Short=AtGolS2; Short=GolS-2; EC=2.4.1.123;	A0A3B6C2D0_WHEAT RecName: Full=Hexosyltransferase {ECO:0000256|RuleBase:RU362027}; EC=2.4.1.- {ECO:0000256|RuleBase:RU362027};	Glycosyl transferase, family 8 - glycogenin	GO:0005737,cytoplasm; GO:0016757,glycosyltransferase activity; GO:0047216,inositol 3-alpha-galactosyltransferase activity; GO:0046872,metal ion binding; GO:0006012,galactose metabolic process; GO:0009737,response to abscisic acid; GO:0009409,response to cold; GO:0006979,response to oxidative stress; GO:0009651,response to salt stress; GO:0009414,response to water deprivation; GO:0003674,molecular…	Glycosyl transferase family 8	--	--	--
Cluster-81570.0	6.81	8.04	7.87	56.47	61.37	59.97	517	683	589	4101	5231	4324	2.99783	0	0	up	3723	--	--	phospholipase A1 PLIP3, chloroplastic [Aegilops tauschii subsp. strangulata]	PLIP2_ARATH RecName: Full=Phospholipase A1 PLIP2, chloroplastic {ECO:0000305}; EC=3.1.1.32 {ECO:0000269|PubMed:29666162}; AltName: Full=Galactolipase PLIP2 {ECO:0000305}; EC=3.1.1.26 {ECO:0000269|PubMed:29666162}; AltName: Full=Protein PLASTID LIPASE 2 {ECO:0000303|PubMed:29666162}; Flags: Precursor;	A0A453EMH4_AEGTS RecName: Full=Lipase_3 domain-containing protein {ECO:0000259|Pfam:PF01764};	--	GO:0009507,chloroplast; GO:0031969,chloroplast membrane; GO:0009570,chloroplast stroma; GO:0102549,1-18:1-2-16:0-monogalactosyldiacylglycerol lipase activity; GO:0052740,1-acyl-2-lysophosphatidylserine acylhydrolase activity; GO:0047714,galactolipase activity; GO:0052739,phosphatidylserine 1-acylhydrolase activity; GO:0008970,phospholipase A1 activity; GO:0002213,defense response to insect; GO:00…	Lipase (class 3)	--	--	--
Cluster-81607.3	312.08	319.07	328.26	2678.12	2645.84	2638.78	7947	8910	8209	64293	74656	62704	3.07354	0	0	up	1322	--	--	RecName: Full=Dehydrin COR410; AltName: Full=Cold-induced COR410 protein [Triticum aestivum]	CO410_WHEAT RecName: Full=Dehydrin COR410; AltName: Full=Cold-induced COR410 protein;	A8CWL2_WHEAT SubName: Full=Dehydrin WZY1-2 {ECO:0000313|EMBL:ABV24865.1};	--	GO:0016020,membrane; GO:0009631,cold acclimation; GO:0009737,response to abscisic acid; GO:0009414,response to water deprivation; GO:0006950,response to stress; GO:0008150,biological_process; GO:0009266,response to temperature stimulus; GO:0009409,response to cold; GO:0009628,response to abiotic stimulus; GO:0050896,response to stimulus; GO:0009719,response to endogenous stimulus; GO:0009725,resp…	Dehydrin	--	--	--
Cluster-81681.0	13.97	13.46	14.57	91.9	91.12	91.49	636	674	652	3978	4622	3919	2.73878	0	0	up	2125	K14497 protein phosphatase 2C [EC:3.1.3.16] | (RefSeq) protein phosphatase 2C 50-like (A)	ko04016: MAPK signaling pathway - plant; ko04075: Plant hormone signal transduction	protein phosphatase 2C 50-like [Hordeum vulgare subsp. vulgare]	P2C50_ORYSJ RecName: Full=Protein phosphatase 2C 50 {ECO:0000305}; Short=OsPP2C50 {ECO:0000303|PubMed:19021904}; EC=3.1.3.16 {ECO:0000269|PubMed:28827170}; AltName: Full=ABI1-like protein 3 {ECO:0000305}; Short=OsABI-LIKE3 {ECO:0000303|PubMed:26491145}; Short=OsABIL3 {ECO:0000303|PubMed:26491145};	F2CWR3_HORVV RecName: Full=Protein-serine/threonine phosphatase {ECO:0000256|ARBA:ARBA00013081}; EC=3.1.3.16 {ECO:0000256|ARBA:ARBA00013081};	Serine/threonine protein phosphatase	GO:0005634,nucleus; GO:0046872,metal ion binding; GO:0017018,myosin phosphatase activity; GO:0004722,protein serine/threonine phosphatase activity; GO:0009738,abscisic acid-activated signaling pathway; GO:0035970,peptidyl-threonine dephosphorylation; GO:0003674,molecular_function; GO:0005488,binding; GO:0043167,ion binding; GO:0043169,cation binding; GO:0003824,catalytic activity; GO:0004721,phos…	Protein phosphatase 2C	--	--	--
Cluster-81898.5	144.67	138.71	130.59	1281.05	1283.35	1280.99	1761	1839	1562	14650	17184	14356	3.22642	0	0	up	792	--	--	hypothetical protein ZWY2020_031985 [Hordeum vulgare]	MT4C_ORYSJ RecName: Full=Metallothionein-like protein 4C; AltName: Full=Class I metallothionein-like protein 4C; AltName: Full=MT-1-4b {ECO:0000303|PubMed:21297036}; AltName: Full=OsMT-I-4c; AltName: Full=OsMT1c;	Q8GTC9_HORVV SubName: Full=Metallothioneine type2 {ECO:0000313|EMBL:CAD54080.1}; Flags: Fragment;	--	GO:0046872,metal ion binding; GO:0009555,pollen development; GO:0072593,reactive oxygen species metabolic process; GO:0003674,molecular_function; GO:0005488,binding; GO:0043167,ion binding; GO:0043169,cation binding; GO:0007275,multicellular organism development; GO:0008150,biological_process; GO:0032501,multicellular organismal process; GO:0032502,developmental process; GO:0048229,gametophyte de…	--	--	--	--
Cluster-81898.6	36.72	35.35	34.55	400.68	385.95	403.35	437	458	403	4477	5049	4415	3.49192	0	0	up	781	--	--	hypothetical protein ZWY2020_031985 [Hordeum vulgare]	MT21_BRAJU RecName: Full=Metallothionein-like protein type 2, MT2-4/MT2-25;	M8A724_TRIUA SubName: Full=Metallothionein-like protein 4A {ECO:0000313|EMBL:EMS56229.1, ECO:0000313|EnsemblPlants:TRIUR3_02631-P1};	--	GO:0046872,metal ion binding; GO:0003674,molecular_function; GO:0005488,binding; GO:0043167,ion binding; GO:0043169,cation binding	--	--	--	--
Cluster-82348.12	320.24	306.37	310.76	1309.72	1266.31	1312.3	9427	9894	8981	36518	41370	36144	2.07669	0	0	up	1697	K00522 ferritin heavy chain [EC:1.16.3.2] | (RefSeq) ferritin-1, chloroplastic-like (A)	--	ferritin 1 [Hordeum vulgare]	FRI1_MAIZE RecName: Full=Ferritin-1, chloroplastic; EC=1.16.3.1; AltName: Full=ZmFer1; Flags: Precursor;	B1NC18_HORVU RecName: Full=Ferritin {ECO:0000256|RuleBase:RU361145}; EC=1.16.3.1 {ECO:0000256|RuleBase:RU361145};	Ferritin	GO:0009507,chloroplast; GO:0005737,cytoplasm; GO:0008199,ferric iron binding; GO:0008198,ferrous iron binding; GO:0004322,ferroxidase activity; GO:0006880,intracellular sequestering of iron ion; GO:0006826,iron ion transport; GO:0003674,molecular_function; GO:0005488,binding; GO:0005506,iron ion binding; GO:0043167,ion binding; GO:0043169,cation binding; GO:0046872,metal ion binding; GO:0046914,t…	Ferritin-like domain	--	--	--
Cluster-82867.0	245.97	257.91	253.52	561.03	558.97	560.46	7540	8679	7632	16297	19024	16083	1.17423	0	0	up	1529	K09873 aquaporin TIP | (RefSeq) aquaporin TIP1-1-like (A)	--	aquaporin TIP1-1-like [Triticum dicoccoides]	TIP11_MAIZE RecName: Full=Aquaporin TIP1-1; AltName: Full=Tonoplast intrinsic protein 1-1; AltName: Full=ZmTIP1-1; AltName: Full=ZmTIP1;1; Short=ZmTIP1;	Q9ZR95_WHEAT SubName: Full=Gamma-type tonoplast intrinsic protein {ECO:0000313|EMBL:AAD10494.1, ECO:0000313|EnsemblPlants:TraesCS4A02G410800.1};	Aquaporin (major intrinsic protein family)	GO:0016021,integral component of membrane; GO:0016020,membrane; GO:0009705,plant-type vacuole membrane; GO:0015250,water channel activity; GO:0048366,leaf development; GO:0009826,unidimensional cell growth; GO:0007033,vacuole organization; GO:0006833,water transport; GO:0003674,molecular_function; GO:0005215,transporter activity; GO:0005372,water transmembrane transporter activity; GO:0015267,cha…	Major intrinsic protein	--	--	--
Cluster-84578.0	56.05	57.12	57.34	2295.82	2354.35	2192.94	618	685	621	23733	28493	22184	5.3357	0	0	up	746	--	--	dehydrin DHN3-like [Lolium perenne]	DH16C_ORYSI RecName: Full=Dehydrin Rab16C;	A0A453PTT4_AEGTS SubName: Full=Uncharacterized protein {ECO:0000313|EnsemblPlants:AET6Gv20864900.7};	--	GO:0009415,response to water; GO:0001101,response to acid chemical; GO:0008150,biological_process; GO:0009628,response to abiotic stimulus; GO:0010035,response to inorganic substance; GO:0042221,response to chemical; GO:0050896,response to stimulus; GO:1901700,response to oxygen-containing compound	--	--	--	--
Cluster-84642.0	329.26	330.24	340.69	133.12	138.72	131.57	9753	10748	9919	3764	4592	3669	-1.27593	0	0	down	2742	K02988 small subunit ribosomal protein S5 | (RefSeq) uncharacterized protein LOC109743185 (A)	ko03010: Ribosome	hypothetical protein CFC21_052479 [Triticum aestivum]	RR5_ARATH RecName: Full=30S ribosomal protein S5, chloroplastic; Flags: Precursor;	A0A446QZD5_TRITD RecName: Full=Ribosomal_S5_C domain-containing protein {ECO:0000259|Pfam:PF03719};	40S ribosomal protein S2/30S ribosomal protein S5	GO:0009507,chloroplast; GO:0009570,chloroplast stroma; GO:0009534,chloroplast thylakoid; GO:0009535,chloroplast thylakoid membrane; GO:0005783,endoplasmic reticulum; GO:0005763,mitochondrial small ribosomal subunit; GO:0005634,nucleus; GO:0009579,thylakoid; GO:0003729,mRNA binding; GO:0019843,rRNA binding; GO:0003735,structural constituent of ribosome; GO:0009955,adaxial/abaxial pattern specifica…	--	--	--	--
Cluster-84737.0	10.51	12.38	10.36	83.85	87.04	82.99	634	813	610	4776	5796	4658	2.95503	0	0	up	3224	K06617 raffinose synthase [EC:2.4.1.82] | (RefSeq) galactinol--sucrose galactosyltransferase-like (A)	ko00052: Galactose metabolism; ko01100: Metabolic pathways	unnamed protein product [Triticum turgidum subsp. durum]	RFS_ORYSJ RecName: Full=Galactinol--sucrose galactosyltransferase; EC=2.4.1.82; AltName: Full=Raffinose synthase;	A0A453E2P4_AEGTS RecName: Full=Galactinol--sucrose galactosyltransferase {ECO:0000256|ARBA:ARBA00012708}; EC=2.4.1.82 {ECO:0000256|ARBA:ARBA00012708};	--	GO:0047274,galactinol-sucrose galactosyltransferase activity; GO:0005975,carbohydrate metabolic process; GO:0003674,molecular_function; GO:0003824,catalytic activity; GO:0008378,galactosyltransferase activity; GO:0016740,transferase activity; GO:0016757,glycosyltransferase activity; GO:0016758,hexosyltransferase activity; GO:0008150,biological_process; GO:0008152,metabolic process; GO:0044238,pri…	Raffinose synthase or seed imbibition protein Sip1	--	--	--
Cluster-86629.11	273.65	265.6	262.76	85.77	86.22	86.95	11962	12765	11280	3559	4192	3570	-1.60425	0	0	down	2050	K05907 adenylyl-sulfate reductase (glutathione) [EC:1.8.4.9] | (RefSeq) probable 5'-adenylylsulfate reductase 1, chloroplastic (A)	ko00920: Sulfur metabolism; ko01100: Metabolic pathways	probable 5'-adenylylsulfate reductase 1, chloroplastic [Triticum urartu]	APR1_ORYSJ RecName: Full=Probable 5'-adenylylsulfate reductase 1, chloroplastic; EC=1.8.4.9; AltName: Full=Adenosine 5'-phosphosulfate 5'-adenylylsulfate sulfotransferase 1; Short=APS sulfotransferase 1; AltName: Full=Adenosine 5'-phosphosulfate reductase-like 1; Short=APR-like1; Short=OsAPRL1; AltName: Full=Thioredoxin-independent APS reductase 1; Flags: Precursor;	M7YY72_TRIUA SubName: Full=Putative 5'-adenylylsulfate reductase 1, chloroplastic {ECO:0000313|EMBL:EMS45005.1, ECO:0000313|EnsemblPlants:TRIUR3_33107-P1};	Phosphoadenosine phosphosulfate reductase	GO:0009507,chloroplast; GO:0051539,4 iron, 4 sulfur cluster binding; GO:0033741,adenylyl-sulfate reductase (glutathione) activity; GO:0046872,metal ion binding; GO:0019344,cysteine biosynthetic process; GO:0019419,sulfate reduction; GO:0003674,molecular_function; GO:0005488,binding; GO:0051536,iron-sulfur cluster binding; GO:0051540,metal cluster binding; GO:0003824,catalytic activity; GO:0016491…	Phosphoadenosine phosphosulfate reductase family	--	--	--
Cluster-86966.1	55.64	57.14	57.41	191.59	200.75	195.96	1829	2063	1854	5972	7332	6037	1.81513	0	0	up	1618	--	--	ninja-family protein 3 [Hordeum vulgare subsp. vulgare]	NNJA3_WHEAT RecName: Full=Ninja-family protein 3; AltName: Full=ABI five-binding protein D1; Short=ABI5-binding protein D1; Short=TaAFP-D1;	F2D7C6_HORVV RecName: Full=Ninja-family protein {ECO:0000256|RuleBase:RU369029}; AltName: Full=ABI-binding protein {ECO:0000256|RuleBase:RU369029};	--	GO:0005634,nucleus; GO:0045892,negative regulation of DNA-templated transcription; GO:0007165,signal transduction; GO:0006139,nucleobase-containing compound metabolic process; GO:0006351,DNA-templated transcription; GO:0006355,regulation of DNA-templated transcription; GO:0006725,cellular aromatic compound metabolic process; GO:0006807,nitrogen compound metabolic process; GO:0008150,biological_pr…	Putative nuclear localisation signal	--	--	--
Cluster-87518.2	214.88	217.43	218.58	91.8	91.05	87.7	6114	6785	6104	2473	2873	2332	-1.24271	0	0	down	1616	K02925 large subunit ribosomal protein L3e | (RefSeq) 60S ribosomal protein L3-like (A)	ko03010: Ribosome	60S ribosomal protein L3 [Aegilops tauschii subsp. strangulata]	RL3_ORYSJ RecName: Full=60S ribosomal protein L3;	A0A453HMC7_AEGTS SubName: Full=Uncharacterized protein {ECO:0000313|EnsemblPlants:AET4Gv20235500.3};	60S ribosomal protein L3 and related proteins	GO:0022625,cytosolic large ribosomal subunit; GO:0003723,RNA binding; GO:0003735,structural constituent of ribosome; GO:0006412,translation; GO:0003674,molecular_function; GO:0003676,nucleic acid binding; GO:0005488,binding; GO:0097159,organic cyclic compound binding; GO:1901363,heterocyclic compound binding; GO:0005198,structural molecule activity; GO:0006518,peptide metabolic process; GO:000680…	Ribosomal protein L3	--	--	--
Cluster-88447.2	5.95	5.15	6.22	75.14	80.49	76.04	379	361	389	4549	5711	4560	3.77442	0	0	up	2847	K09840 9-cis-epoxycarotenoid dioxygenase [EC:1.13.11.51] | (RefSeq) 9-cis-epoxycarotenoid dioxygenase 1, chloroplastic-like (A)	ko00906: Carotenoid biosynthesis; ko01100: Metabolic pathways; ko01110: Biosynthesis of secondary metabolites	9-cis-epoxycarotenoid dioxygenase NCED3, chloroplastic [Aegilops tauschii subsp. strangulata]	NCED3_ORYSJ RecName: Full=9-cis-epoxycarotenoid dioxygenase NCED3, chloroplastic {ECO:0000305}; Short=OsNCED3 {ECO:0000312|EMBL:AAW21319.1}; EC=1.13.11.51 {ECO:0000250|UniProtKB:O24592}; Flags: Precursor;	A0A453LQ75_AEGTS SubName: Full=Uncharacterized protein {ECO:0000313|EnsemblPlants:AET5Gv20874800.2};	Beta, beta-carotene 15,15'-dioxygenase and related enzymes	GO:0009570,chloroplast stroma; GO:0045549,9-cis-epoxycarotenoid dioxygenase activity; GO:0010436,carotenoid dioxygenase activity; GO:0046872,metal ion binding; GO:0009688,abscisic acid biosynthetic process; GO:0016121,carotene catabolic process; GO:0003674,molecular_function; GO:0003824,catalytic activity; GO:0016491,oxidoreductase activity; GO:0016701,oxidoreductase activity, acting on single do…	Retinal pigment epithelial membrane protein	--	--	--
Cluster-88447.3	2.47	2.15	2.6	30.65	31.85	32.43	133	127	137	1567	1908	1641	3.75176	0	0	up	2453	K09840 9-cis-epoxycarotenoid dioxygenase [EC:1.13.11.51] | (RefSeq) 9-cis-epoxycarotenoid dioxygenase NCED5, chloroplastic-like (A)	ko00906: Carotenoid biosynthesis; ko01100: Metabolic pathways; ko01110: Biosynthesis of secondary metabolites	9-cis-epoxycarotenoid dioxygenase NCED5, chloroplastic-like [Triticum dicoccoides]	NCED5_ORYSJ RecName: Full=9-cis-epoxycarotenoid dioxygenase NCED5, chloroplastic {ECO:0000305}; Short=OsNCED5 {ECO:0000312|EMBL:AAW21321.1}; EC=1.13.11.51 {ECO:0000250|UniProtKB:O24592}; Flags: Precursor;	A0A453JKV5_AEGTS SubName: Full=Uncharacterized protein {ECO:0000313|EnsemblPlants:AET5Gv20099800.1};	Beta, beta-carotene 15,15'-dioxygenase and related enzymes	GO:0009570,chloroplast stroma; GO:0045549,9-cis-epoxycarotenoid dioxygenase activity; GO:0010436,carotenoid dioxygenase activity; GO:0046872,metal ion binding; GO:0009688,abscisic acid biosynthetic process; GO:0016121,carotene catabolic process; GO:0003674,molecular_function; GO:0003824,catalytic activity; GO:0016491,oxidoreductase activity; GO:0016701,oxidoreductase activity, acting on single do…	Retinal pigment epithelial membrane protein	--	--	--
Cluster-88560.0	3.8	4.42	4.23	90.85	93.24	95.25	91	119	99	2066	2488	2136	4.50246	0	0	up	1487	K13496 UDP-glucosyltransferase 73C [EC:2.4.1.-] | (RefSeq) scopoletin glucosyltransferase (A)	ko00908: Zeatin biosynthesis; ko01110: Biosynthesis of secondary metabolites	uncharacterized protein LOC119367808 [Triticum dicoccoides]	--	A0A453BV43_AEGTS SubName: Full=Uncharacterized protein {ECO:0000313|EnsemblPlants:AET2Gv20640900.1};	--	GO:0016021,integral component of membrane; GO:0005575,cellular_component; GO:0016020,membrane; GO:0031224,intrinsic component of membrane; GO:0110165,cellular anatomical entity	--	--	--	--
Cluster-89136.4	198.08	214.72	259.33	1629.93	1617.95	1582.41	867	950	940	5904	6969	5790	2.82325	0	0	up	572	K00521 ferric-chelate reductase [EC:1.16.1.7] | (RefSeq) ferric reduction oxidase 7, chloroplastic-like (A)	--	unnamed protein product [Triticum turgidum subsp. durum]	NAC48_ORYSJ RecName: Full=NAC domain-containing protein 48 {ECO:0000303|PubMed:15029955}; Short=ONAC048 {ECO:0000303|PubMed:15029955}; AltName: Full=OsNAC6 {ECO:0000303|PubMed:10660065}; AltName: Full=Protein STRESS-RESPONSIVE NAC 2 {ECO:0000303|PubMed:18273684};	A0A446NYH4_TRITD RecName: Full=NAC domain-containing protein {ECO:0000259|PROSITE:PS51005};	--	GO:0005634,nucleus; GO:0043565,sequence-specific DNA binding; GO:1901002,positive regulation of response to salt stress; GO:1902584,positive regulation of response to water deprivation; GO:0045893,positive regulation of DNA-templated transcription; GO:1900150,regulation of defense response to fungus; GO:0040008,regulation of growth; GO:0009409,response to cold; GO:0048364,root development; GO:000…	No apical meristem (NAM) protein	NAC	TF	NAC
Cluster-90249.0	24.39	22.04	21.84	159.77	164.48	169.63	539	540	476	3406	4110	3591	2.90149	0	0	up	1415	K13448 calcium-binding protein CML | (RefSeq) probable calcium-binding protein CML15 (A)	ko04626: Plant-pathogen interaction	probable calcium-binding protein CML15 [Triticum dicoccoides]	CML15_ORYSJ RecName: Full=Probable calcium-binding protein CML15; AltName: Full=Calmodulin-like protein 15;	A0A452YZU9_AEGTS SubName: Full=Uncharacterized protein {ECO:0000313|EnsemblPlants:AET1Gv20584900.1};	Calmodulin and related proteins (EF-Hand superfamily)	GO:0005509,calcium ion binding; GO:0003674,molecular_function; GO:0005488,binding; GO:0043167,ion binding; GO:0043169,cation binding; GO:0046872,metal ion binding	EF hand	--	--	--
Cluster-90412.1	89.56	88.48	82.97	437.83	444.49	426.1	3058	3306	2720	14012	16828	13582	2.35397	0	0	up	2080	K13071 pheophorbide a oxygenase [EC:1.14.15.17] | (RefSeq) pheophorbide a oxygenase, chloroplastic (A)	ko00860: Porphyrin metabolism; ko01110: Biosynthesis of secondary metabolites	unnamed protein product [Triticum turgidum subsp. durum]	PAO_ORYSJ RecName: Full=Pheophorbide a oxygenase, chloroplastic {ECO:0000303|PubMed:21807436}; Short=OsPaO {ECO:0000303|PubMed:21807436}; Short=Pheide a oxygenase {ECO:0000305}; EC=1.14.15.17 {ECO:0000250|UniProtKB:Q9FYC2}; Flags: Precursor;	A0A453J0A8_AEGTS RecName: Full=Rieske domain-containing protein {ECO:0000259|PROSITE:PS51296};	--	GO:0009507,chloroplast; GO:0005737,cytoplasm; GO:0051537,2 iron, 2 sulfur cluster binding; GO:0010277,chlorophyllide a oxygenase [overall] activity; GO:0046872,metal ion binding; GO:0016491,oxidoreductase activity; GO:0032441,pheophorbide a oxygenase activity; GO:0008219,cell death; GO:0015996,chlorophyll catabolic process; GO:0042742,defense response to bacterium; GO:0009908,flower development; …	Pheophorbide a oxygenase	--	--	--
Cluster-90811.1	11.02	11.11	10.08	37.13	38.32	38.11	1094	1251	1038	3776	4529	3780	1.9025	0	0	up	5971	K12617 DNA topoisomerase 2-associated protein PAT1 | (RefSeq) protein PAT1 homolog 1-like (A)	ko03018: RNA degradation	unnamed protein product [Triticum turgidum subsp. durum]	PATH1_ARATH RecName: Full=Protein PAT1 homolog 1 {ECO:0000305}; Short=AtPAT1H1 {ECO:0000305}; AltName: Full=Protein ROOT STEM CELL DEFECTIVE 2 {ECO:0000303|PubMed:26956135};	A0A446Q0R6_TRITD SubName: Full=Uncharacterized protein {ECO:0000313|EMBL:VAH80179.1};	--	GO:0005783,endoplasmic reticulum; GO:1990726,Lsm1-7-Pat1 complex; GO:0005634,nucleus; GO:0000932,P-body; GO:0003723,RNA binding; GO:0007049,cell cycle; GO:0051301,cell division; GO:0000290,deadenylation-dependent decapping of nuclear-transcribed mRNA; GO:0006397,mRNA processing; GO:0033962,P-body assembly; GO:0019827,stem cell population maintenance; GO:0003674,molecular_function; GO:0003676,nucl…	EF hand	--	--	--
Cluster-91092.4	62.3	61.67	63.46	182.41	181.33	187.26	1766	1922	1764	4888	5692	4947	1.57587	0	0	up	2039	K08726 soluble epoxide hydrolase / lipid-phosphate phosphatase [EC:3.3.2.10 3.1.3.76] | (RefSeq) uncharacterized protein LOC107492180 (A)	ko00590: Arachidonic acid metabolism; ko01100: Metabolic pathways; ko04146: Peroxisome	epoxide hydrolase A-like [Triticum urartu]	--	A0A3B6RD04_WHEAT RecName: Full=AB hydrolase-1 domain-containing protein {ECO:0000259|Pfam:PF00561};	Soluble epoxide hydrolase	GO:0016787,hydrolase activity; GO:0003674,molecular_function; GO:0003824,catalytic activity	alpha/beta hydrolase fold	--	--	--
Cluster-92097.1	98.93	106.04	103.2	19.81	18.65	18.07	3317	3905	3398	630	695	567	-2.42202	0	0	down	1644	K22588 acetylserotonin O-methyltransferase, plant [EC:2.1.1.4] | (RefSeq) acetylserotonin O-methyltransferase 3 (A)	ko00380: Tryptophan metabolism; ko01100: Metabolic pathways; ko01110: Biosynthesis of secondary metabolites	O-methyltransferase ZRP4 [Aegilops tauschii subsp. strangulata]	ZRP4_MAIZE RecName: Full=O-methyltransferase ZRP4; Short=OMT; EC=2.1.1.-;	A0A452ZJV0_AEGTS SubName: Full=Uncharacterized protein {ECO:0000313|EnsemblPlants:AET1Gv20807000.1};	Hydroxyindole-O-methyltransferase and related SAM-dependent methyltransferases	GO:0008171,O-methyltransferase activity; GO:0046983,protein dimerization activity; GO:0008757,S-adenosylmethionine-dependent methyltransferase activity; GO:0019438,aromatic compound biosynthetic process; GO:0032259,methylation; GO:0003674,molecular_function; GO:0003824,catalytic activity; GO:0008168,methyltransferase activity; GO:0016740,transferase activity; GO:0016741,transferase activity, tran…	O-methyltransferase domain	--	--	--
Cluster-9239.2	158.86	147.34	138.87	785.5	754.5	778.1	1540	1550	1322	7125	8011	6893	2.38588	0	0	up	693	--	--	unnamed protein product [Triticum turgidum subsp. durum]	--	M8BUY4_AEGTA SubName: Full=Uncharacterized protein {ECO:0000313|EMBL:EMT25638.1, ECO:0000313|EnsemblPlants:EMT25638};	--	--	--	--	--	--
Cluster-9239.5	195.87	203.48	184.84	1011.49	961.9	999.38	6506	6527	5910	31441	33764	31146	2.41494	0	0	up	1705	K16297 serine carboxypeptidase-like clade II [EC:3.4.16.-] | (RefSeq) serine carboxypeptidase-like 34 (A)	--	unnamed protein product [Triticum turgidum subsp. durum]	--	M8BUY4_AEGTA SubName: Full=Uncharacterized protein {ECO:0000313|EMBL:EMT25638.1, ECO:0000313|EnsemblPlants:EMT25638};	--	--	--	--	--	--
Cluster-92704.0	20.23	17.21	18.16	128.9	132.09	126.35	411	382	363	2474	2969	2382	2.82057	0	0	up	1146	K00521 ferric-chelate reductase [EC:1.16.1.7] | (RefSeq) ferric reduction oxidase 7, chloroplastic-like (A)	--	NAC domain-containing protein 92 [Aegilops tauschii subsp. strangulata]	NC100_ARATH RecName: Full=NAC domain-containing protein 100 {ECO:0000303|PubMed:15029955}; Short=ANAC100 {ECO:0000303|PubMed:15029955}; Short=AtNAC5;	A0A453AN40_AEGTS RecName: Full=NAC domain-containing protein {ECO:0000259|PROSITE:PS51005};	--	GO:0005634,nucleus; GO:0003677,DNA binding; GO:0003700,DNA-binding transcription factor activity; GO:0003674,molecular_function; GO:0003676,nucleic acid binding; GO:0005488,binding; GO:0097159,organic cyclic compound binding; GO:1901363,heterocyclic compound binding; GO:0140110,transcription regulator activity; GO:0005575,cellular_component; GO:0005622,intracellular anatomical structure; GO:00432…	No apical meristem (NAM) protein	NAC	TF	NAC
Cluster-92762.19	21.03	21.31	21.28	442.07	434.48	456.17	352	390	351	6976	8030	7078	4.40378	0	0	up	1406	K19747 BAHD acyltransferase [EC:2.3.1.-] | (RefSeq) BAHD acyltransferase DCR (A)	--	unnamed protein product [Triticum turgidum subsp. durum]	Y3028_ARATH RecName: Full=Uncharacterized acetyltransferase At3g50280; EC=2.3.1.-;	A0A446KHQ5_TRITD SubName: Full=Uncharacterized protein {ECO:0000313|EMBL:VAH24846.1};	--	GO:0016746,acyltransferase activity; GO:0003674,molecular_function; GO:0003824,catalytic activity; GO:0016740,transferase activity	Transferase family	--	--	--
Cluster-93182.2	48.88	45.23	47.79	209.43	210.71	209.49	1493	1542	1433	6148	7241	6092	2.18863	0	0	up	1563	--	--	late embryogenesis abundant protein 3 [Leymus chinensis]	LEA14_GOSHI RecName: Full=Late embryogenesis abundant protein Lea14-A;	A0A7U3UBN1_LEYCH SubName: Full=Late embryogenesis abundant protein 3 {ECO:0000313|EMBL:QPO15901.1};	--	GO:0009269,response to desiccation; GO:0001101,response to acid chemical; GO:0006950,response to stress; GO:0008150,biological_process; GO:0009414,response to water deprivation; GO:0009415,response to water; GO:0009628,response to abiotic stimulus; GO:0010035,response to inorganic substance; GO:0042221,response to chemical; GO:0050896,response to stimulus; GO:1901700,response to oxygen-containing…	Late embryogenesis abundant protein	--	--	--
Cluster-93602.0	50.75	52.73	50.27	11.5	10.83	10.7	3219	3684	3132	695	766	640	-2.18891	0	0	down	2926	--	--	uncharacterized protein LOC119277641 [Triticum dicoccoides]	--	A0A453FY60_AEGTS SubName: Full=Uncharacterized protein {ECO:0000313|EnsemblPlants:AET3Gv20825300.2};	--	GO:0016021,integral component of membrane; GO:0005575,cellular_component; GO:0016020,membrane; GO:0031224,intrinsic component of membrane; GO:0110165,cellular anatomical entity	--	--	--	--
Cluster-94585.0	4.34	4.28	4.39	67.53	69.35	69.75	268	291	267	3979	4784	4065	4.02205	0	0	up	2828	K10260 F-box and WD-40 domain protein 7 | (RefSeq) WD40 repeat protein (A)	ko04120: Ubiquitin mediated proteolysis	U-box domain-containing protein 19-like [Triticum aestivum]	PUB19_ARATH RecName: Full=U-box domain-containing protein 19; EC=2.3.2.27; AltName: Full=Plant U-box protein 19; AltName: Full=RING-type E3 ubiquitin transferase PUB19 {ECO:0000305};	A0A446T355_TRITD RecName: Full=RING-type E3 ubiquitin transferase {ECO:0000256|ARBA:ARBA00012483}; EC=2.3.2.27 {ECO:0000256|ARBA:ARBA00012483};	FOG: Armadillo/beta-catenin-like repeats	GO:0005737,cytoplasm; GO:0005634,nucleus; GO:0004842,ubiquitin-protein transferase activity; GO:0010029,regulation of seed germination; GO:0003674,molecular_function; GO:0003824,catalytic activity; GO:0016740,transferase activity; GO:0019787,ubiquitin-like protein transferase activity; GO:0140096,catalytic activity, acting on a protein; GO:0007275,multicellular organism development; GO:0008150,bi…	U-box domain	--	--	--
Cluster-95057.2	88.39	86	87.22	521.14	529.46	512.93	3296	3529	3191	18449	21982	17970	2.60737	0	0	up	2129	K03696 ATP-dependent Clp protease ATP-binding subunit ClpC | (RefSeq) chaperone protein ClpD1, chloroplastic-like (A)	--	predicted protein, partial [Hordeum vulgare subsp. vulgare]	CLPD1_ORYSJ RecName: Full=Chaperone protein ClpD1, chloroplastic {ECO:0000305}; AltName: Full=ATP-dependent Clp protease ATP-binding subunit ClpD homolog 1 {ECO:0000305}; AltName: Full=Casein lytic proteinase D1 {ECO:0000303|PubMed:27457985}; Flags: Precursor;	A0A453LFB2_AEGTS RecName: Full=AAA domain-containing protein {ECO:0000259|SMART:SM00382};	Chaperone HSP104 and related ATP-dependent Clp proteases	GO:0009507,chloroplast; GO:0005524,ATP binding; GO:0016887,ATP hydrolysis activity; GO:0034605,cellular response to heat; GO:1901002,positive regulation of response to salt stress; GO:1902584,positive regulation of response to water deprivation; GO:0000166,nucleotide binding; GO:0003674,molecular_function; GO:0005488,binding; GO:0017076,purine nucleotide binding; GO:0030554,adenyl nucleotide bind…	C-terminal, D2-small domain, of ClpB protein	--	--	--
Cluster-9634.8	14.46	12.7	12.85	84.22	83.36	85.94	533	513	465	2941	3413	2966	2.68983	0	0	up	1857	--	--	protein NEN1-like [Triticum aestivum]	NEN1_ARATH RecName: Full=Protein NEN1 {ECO:0000303|PubMed:25081480}; AltName: Full=NAC45/NAC86-dependent exonuclease-domain protein 1 {ECO:0000303|PubMed:25081480}; EC=3.1.11.-;	A0A446SSB7_TRITD RecName: Full=Exonuclease domain-containing protein {ECO:0000259|SMART:SM00479};	--	GO:0005737,cytoplasm; GO:0005634,nucleus; GO:0008408,3'-5' exonuclease activity; GO:0046872,metal ion binding; GO:0003676,nucleic acid binding; GO:0003674,molecular_function; GO:0003824,catalytic activity; GO:0004518,nuclease activity; GO:0004527,exonuclease activity; GO:0016787,hydrolase activity; GO:0016788,hydrolase activity, acting on ester bonds; GO:0005488,binding; GO:0043167,ion binding; G…	Exonuclease	--	--	--
Cluster-97091.0	52.18	52.91	50.54	177.75	177.62	183.31	1725	1921	1641	5571	6523	5678	1.81595	0	0	up	1625	K14780 ATP-dependent RNA helicase DHX37/DHR1 [EC:3.6.4.13] | (RefSeq) ATP-dependent RNA helicase DEAH13-like isoform X1 (A)	--	uncharacterized protein LOC123097931 [Triticum aestivum]	--	A0A453IED7_AEGTS SubName: Full=Uncharacterized protein {ECO:0000313|EnsemblPlants:AET4Gv20536100.2};	Galactosyltransferases	GO:0016021,integral component of membrane; GO:0005575,cellular_component; GO:0016020,membrane; GO:0031224,intrinsic component of membrane; GO:0110165,cellular anatomical entity	Protein of unknown function, DUF604	--	--	--
Cluster-97141.6	34.83	38.71	36.91	115.02	113.35	112.71	2737	3350	2848	8596	9928	8348	1.65634	0	0	up	3441	K12657 delta-1-pyrroline-5-carboxylate synthetase [EC:2.7.2.11 1.2.1.41] | (RefSeq) delta-1-pyrroline-5-carboxylate synthase 1 (A)	ko00330: Arginine and proline metabolism; ko01100: Metabolic pathways; ko01110: Biosynthesis of secondary metabolites; ko01230: Biosynthesis of amino acids	delta-1-pyrroline-5-carboxylate synthase 1 [Triticum urartu]	P5CS1_ORYSJ RecName: Full=Delta-1-pyrroline-5-carboxylate synthase 1 {ECO:0000305}; Short=OsP5CS1 {ECO:0000303|Ref.8}; Includes: RecName: Full=Glutamate 5-kinase; Short=GK; EC=2.7.2.11; AltName: Full=Gamma-glutamyl kinase; Includes: RecName: Full=Gamma-glutamyl phosphate reductase; Short=GPR; EC=1.2.1.41; AltName: Full=Glutamate-5-semialdehyde dehydrogenase; AltName: Full=Glutamyl-gamma-semialdeh…	Q58QF6_WHEAT RecName: Full=Delta-1-pyrroline-5-carboxylate synthase {ECO:0000256|PIRNR:PIRNR036429}; Includes: RecName: Full=Glutamate 5-kinase {ECO:0000256|PIRNR:PIRNR036429}; Short=GK {ECO:0000256|PIRNR:PIRNR036429}; EC=2.7.2.11 {ECO:0000256|PIRNR:PIRNR036429}; AltName: Full=Gamma-glutamyl kinase {ECO:0000256|PIRNR:PIRNR036429}; Includes: RecName: Full=Gamma-glutamyl phosphate reductase {ECO:00…	Gamma-glutamyl phosphate reductase	GO:0005737,cytoplasm; GO:0005524,ATP binding; GO:0004349,glutamate 5-kinase activity; GO:0004350,glutamate-5-semialdehyde dehydrogenase activity; GO:0055129,L-proline biosynthetic process; GO:0016310,phosphorylation; GO:0006561,proline biosynthetic process; GO:0000166,nucleotide binding; GO:0003674,molecular_function; GO:0005488,binding; GO:0017076,purine nucleotide binding; GO:0030554,adenyl nuc…	Amino acid kinase family	--	--	--
Cluster-97687.0	330.48	343.26	327.84	116.19	114.64	114.02	6654	7606	6520	2214	2560	2135	-1.52227	0	0	down	1116	--	--	spore wall protein 1-like [Triticum aestivum]	--	A0A446XM37_TRITD SubName: Full=Uncharacterized protein {ECO:0000313|EMBL:VAI77360.1};	--	--	Glycine rich protein family	--	--	--
Cluster-97802.3	18.69	17.33	16.93	137.99	136.02	136.68	1100	1137	999	7827	9151	7627	2.99129	0	0	up	3495	--	--	hypothetical protein CFC21_006340 [Triticum aestivum]	--	A0A446JSP8_TRITD RecName: Full=DUF1338 domain-containing protein {ECO:0000259|SMART:SM01150};	--	--	Domain of unknown function (DUF1338)	--	--	--
Cluster-97802.8	32.06	37.09	42.44	356.45	356.04	323.52	468	591	608	4902	5734	4370	3.2329	0	0	up	889	--	--	uncharacterized protein LOC125508496 [Triticum urartu]	--	A0A446ITL0_TRITD RecName: Full=DUF1338 domain-containing protein {ECO:0000259|SMART:SM01150};	--	--	Domain of unknown function (DUF1338)	--	--	--
Cluster-99532.2	31.44	34.69	34.27	365.1	361.06	329.33	212	252	227	2285	2643	1998	3.38848	0	0	up	575	K05349 beta-glucosidase [EC:3.2.1.21] | (RefSeq) beta-glucosidase BoGH3B-like isoform X1 (A)	ko00460: Cyanoamino acid metabolism; ko00500: Starch and sucrose metabolism; ko00999: Biosynthesis of various plant secondary metabolites; ko01100: Metabolic pathways; ko01110: Biosynthesis of secondary metabolites	unnamed protein product [Triticum turgidum subsp. durum]	--	A0A446UMB1_TRITD RecName: Full=Glyco_hydro_3_C domain-containing protein {ECO:0000259|Pfam:PF01915};	--	GO:0004553,hydrolase activity, hydrolyzing O-glycosyl compounds; GO:0005975,carbohydrate metabolic process; GO:0003674,molecular_function; GO:0003824,catalytic activity; GO:0016787,hydrolase activity; GO:0016798,hydrolase activity, acting on glycosyl bonds; GO:0008150,biological_process; GO:0008152,metabolic process; GO:0044238,primary metabolic process; GO:0071704,organic substance metabolic pro…	Glycosyl hydrolase family 3 C-terminal domain	--	--	--
Cluster-99532.6	3.69	4.53	4.97	115.99	116.56	106.34	158	214	209	4736	5576	4295	4.71545	0	0	up	2022	K05349 beta-glucosidase [EC:3.2.1.21] | (RefSeq) beta-glucosidase BoGH3B-like isoform X1 (A)	ko00460: Cyanoamino acid metabolism; ko00500: Starch and sucrose metabolism; ko00999: Biosynthesis of various plant secondary metabolites; ko01100: Metabolic pathways; ko01110: Biosynthesis of secondary metabolites	beta-glucosidase BoGH3B-like isoform X3 [Hordeum vulgare subsp. vulgare]	BXL4_ARATH RecName: Full=Beta-D-xylosidase 4; Short=AtBXL4; EC=3.2.1.37; Flags: Precursor;	A0A453LTP3_AEGTS SubName: Full=Uncharacterized protein {ECO:0000313|EnsemblPlants:AET5Gv20905400.5};	--	GO:0048046,apoplast; GO:0016020,membrane; GO:0046556,alpha-L-arabinofuranosidase activity; GO:0009044,xylan 1,4-beta-xylosidase activity; GO:0031222,arabinan catabolic process; GO:0009627,systemic acquired resistance; GO:0045493,xylan catabolic process; GO:0003674,molecular_function; GO:0003824,catalytic activity; GO:0004553,hydrolase activity, hydrolyzing O-glycosyl compounds; GO:0016787,hydrola…	Glycosyl hydrolase family 3 N terminal domain	--	--	--
Cluster-99532.9	17.04	16.35	18.81	282.53	287.2	269.04	803	848	871	12656	15076	11927	4.03668	0	0	up	2188	K05349 beta-glucosidase [EC:3.2.1.21] | (RefSeq) beta-glucosidase BoGH3B-like isoform X1 (A)	ko00460: Cyanoamino acid metabolism; ko00500: Starch and sucrose metabolism; ko00999: Biosynthesis of various plant secondary metabolites; ko01100: Metabolic pathways; ko01110: Biosynthesis of secondary metabolites	beta-D-glucan exohydrolase isoenzyme ExoI [Hordeum vulgare]	XYL2_MEDSV RecName: Full=Beta-xylosidase/alpha-L-arabinofuranosidase 2 {ECO:0000303|PubMed:17615411, ECO:0000312|EMBL:ABQ45228.1}; AltName: Full=Xylan 1,4-beta-xylosidase/Alpha-L-arabinofuranosidase 2; Short=MsXyl2 {ECO:0000303|PubMed:17615411}; Includes: RecName: Full=Beta-xylosidase; EC=3.2.1.37; AltName: Full=1,4-beta-D-xylan xylohydrolase {ECO:0000250|UniProtKB:P48792}; AltName: Full=Xylan 1,…	A0A8I6XKI1_HORVV SubName: Full=Uncharacterized protein {ECO:0000313|EnsemblPlants:HORVU.MOREX.r3.5HG0510650.6};	--	GO:0005576,extracellular region; GO:0046556,alpha-L-arabinofuranosidase activity; GO:0009044,xylan 1,4-beta-xylosidase activity; GO:0045493,xylan catabolic process; GO:0003674,molecular_function; GO:0003824,catalytic activity; GO:0004553,hydrolase activity, hydrolyzing O-glycosyl compounds; GO:0016787,hydrolase activity; GO:0016798,hydrolase activity, acting on glycosyl bonds; GO:0097599,xylanase…	Glycosyl hydrolase family 3 N terminal domain	--	--	--
Cluster-996.0	17.07	18.94	18.74	170.23	160.7	169.12	461	562	497	4359	4821	4275	3.21494	0	0	up	1385	K20471 coatomer subunit delta | (RefSeq) coatomer subunit delta-3 (A)	--	ATP-dependent Clp protease adapter protein CLPS2, chloroplastic-like [Triticum dicoccoides]	CLPS2_CHLRE RecName: Full=ATP-dependent Clp protease adapter protein CLPS2, chloroplastic {ECO:0000305}; Flags: Precursor;	A0A446NU74_TRITD RecName: Full=ClpS domain-containing protein {ECO:0000259|Pfam:PF02617};	--	GO:0009570,chloroplast stroma; GO:0006508,proteolysis; GO:0006807,nitrogen compound metabolic process; GO:0008150,biological_process; GO:0008152,metabolic process; GO:0019538,protein metabolic process; GO:0043170,macromolecule metabolic process; GO:0044238,primary metabolic process; GO:0071704,organic substance metabolic process; GO:1901564,organonitrogen compound metabolic process; GO:0005575,ce…	--	--	--	--
Cluster-996.2	35.68	30.8	29.56	264.75	267.74	274.92	1362	1283	1120	9684	11443	9917	3.10728	0	0	up	2298	K20471 coatomer subunit delta | (RefSeq) coatomer subunit delta-3 (A)	--	ATP-dependent Clp protease adapter protein CLPS2, chloroplastic [Aegilops tauschii subsp. strangulata]	CLPS2_CHLRE RecName: Full=ATP-dependent Clp protease adapter protein CLPS2, chloroplastic {ECO:0000305}; Flags: Precursor;	A0A453FVA4_AEGTS RecName: Full=ClpS domain-containing protein {ECO:0000259|Pfam:PF02617};	--	GO:0009570,chloroplast stroma; GO:0006508,proteolysis; GO:0006807,nitrogen compound metabolic process; GO:0008150,biological_process; GO:0008152,metabolic process; GO:0019538,protein metabolic process; GO:0043170,macromolecule metabolic process; GO:0044238,primary metabolic process; GO:0071704,organic substance metabolic process; GO:1901564,organonitrogen compound metabolic process; GO:0005575,ce…	ATP-dependent Clp protease adaptor protein ClpS	--	--	--
Cluster-99834.0	22.46	23.6	22.26	79.27	82.54	82.28	877	1015	849	2974	3607	3031	1.8758	0	0	up	2526	K00993 ethanolaminephosphotransferase [EC:2.7.8.1] | (RefSeq) choline/ethanolaminephosphotransferase 1-like (A)	ko00440: Phosphonate and phosphinate metabolism; ko00564: Glycerophospholipid metabolism; ko00565: Ether lipid metabolism; ko01100: Metabolic pathways; ko01110: Biosynthesis of secondary metabolites	choline/ethanolaminephosphotransferase 1-like [Triticum dicoccoides]	AAPT1_ARATH RecName: Full=Choline/ethanolaminephosphotransferase 1; EC=2.7.8.1; EC=2.7.8.2; AltName: Full=Aminoalcohol phosphotransferase 1; Short=AtAAPT1;	C7G530_WHEAT SubName: Full=ECPT-type aminoalcoholphosphotransferase {ECO:0000313|EMBL:BAI22703.1, ECO:0000313|EnsemblPlants:TraesCS7A02G165300.1};	sn-1,2-diacylglycerol ethanolamine- and cholinephosphotranferases	GO:0005794,Golgi apparatus; GO:0016021,integral component of membrane; GO:0004142,diacylglycerol cholinephosphotransferase activity; GO:0004307,ethanolaminephosphotransferase activity; GO:0046872,metal ion binding; GO:0006646,phosphatidylethanolamine biosynthetic process; GO:0003674,molecular_function; GO:0003824,catalytic activity; GO:0016740,transferase activity; GO:0016772,transferase activity…	CDP-alcohol phosphatidyltransferase	--	--	--
Cluster-79877.19	5.74	5.6	6.35	154.09	146.67	137.22	64	67	69	1611	1795	1404	4.65186	1.10674e-307	2.52521e-305	up	751	K03283 heat shock 70kDa protein 1/6/8 | (RefSeq) heat shock cognate 70 kDa protein-like (A)	ko03040: Spliceosome; ko04141: Protein processing in endoplasmic reticulum; ko04144: Endocytosis	heat shock cognate 70 kDa protein-like [Triticum dicoccoides]	HSP7C_PETHY RecName: Full=Heat shock cognate 70 kDa protein;	A0A453IDA3_AEGTS SubName: Full=Uncharacterized protein {ECO:0000313|EnsemblPlants:AET4Gv20525900.3};	Molecular chaperones HSP70/HSC70, HSP70 superfamily	GO:0005524,ATP binding; GO:0140662,ATP-dependent protein folding chaperone; GO:0000166,nucleotide binding; GO:0003674,molecular_function; GO:0005488,binding; GO:0017076,purine nucleotide binding; GO:0030554,adenyl nucleotide binding; GO:0032553,ribonucleotide binding; GO:0032555,purine ribonucleotide binding; GO:0032559,adenyl ribonucleotide binding; GO:0035639,purine ribonucleoside triphosphate …	Hsp70 protein	--	--	--
Cluster-131751.2	57.72	23.1	21.66	149.55	93.44	88.24	1476	1630	1334	5284	6619	5355	2.02229	1.44455e-307	3.28231e-305	up	3324	--	--	RNA polymerase II degradation factor 1-like isoform X2 [Triticum dicoccoides]	--	A0A446KC42_TRITD RecName: Full=DUF1421 domain-containing protein {ECO:0000259|Pfam:PF07223};	--	--	UBA-like domain (DUF1421)	--	--	--
Cluster-128633.0	38.56	36.42	30.8	105.49	100.02	99.93	1004	1107	1024	2988	3586	3053	1.68361	4.46346e-307	1.01e-304	up	3833	K07300 Ca2+:H+ antiporter | (RefSeq) vacuolar cation/proton exchanger 5-like isoform X1 (A)	--	NCL_2B [Triticum aestivum]	NCL2_ORYSJ RecName: Full=Sodium/calcium exchanger NCL2 {ECO:0000305}; AltName: Full=Na(+)/Ca(2+)-exchange protein NCL2 {ECO:0000305}; AltName: Full=OsEFCAX2 {ECO:0000303|PubMed:24286292}; AltName: Full=Protein NCX-like 2 {ECO:0000305}; Short=OsNCL2 {ECO:0000305};	A0A4P8XJ67_WHEAT SubName: Full=NCL_2B {ECO:0000313|EMBL:QCS60950.1};	--	GO:0016021,integral component of membrane; GO:0005886,plasma membrane; GO:0005774,vacuolar membrane; GO:0005509,calcium ion binding; GO:0015369,calcium:proton antiporter activity; GO:0070588,calcium ion transmembrane transport; GO:0006874,cellular calcium ion homeostasis; GO:0006814,sodium ion transport; GO:0003674,molecular_function; GO:0005488,binding; GO:0043167,ion binding; GO:0043169,cation …	Sodium/calcium exchanger protein	--	--	--
Cluster-141442.0	331.92	327.8	332.19	142.96	135.85	131.74	7523	8139	7367	2921	3421	2754	-1.27631	3.90986e-304	8.81086e-302	down	1213	K02968 small subunit ribosomal protein S20 | (RefSeq) 30S ribosomal protein S20, chloroplastic-like (A)	ko03010: Ribosome	30S ribosomal protein S20, chloroplastic-like [Triticum dicoccoides]	RR20_ARATH RecName: Full=30S ribosomal protein S20, chloroplastic; Flags: Precursor;	W5D1D3_WHEAT SubName: Full=Uncharacterized protein {ECO:0000313|EMBL:CDM83937.1, ECO:0000313|EnsemblPlants:TraesCS3B02G303000.1};	--	GO:0009507,chloroplast; GO:0009941,chloroplast envelope; GO:0009570,chloroplast stroma; GO:0005829,cytosol; GO:0015935,small ribosomal subunit; GO:0003729,mRNA binding; GO:0070181,small ribosomal subunit rRNA binding; GO:0003735,structural constituent of ribosome; GO:0006412,translation; GO:0003674,molecular_function; GO:0003676,nucleic acid binding; GO:0003723,RNA binding; GO:0005488,binding; GO…	Ribosomal protein S20	--	--	--
Cluster-129190.2	7.97	9.35	9.9	89.48	83.91	87.68	151	195	184	1610	1767	1551	3.28539	4.48006e-303	1.00544e-300	up	1185	K17991 peroxygenase [EC:1.11.2.3] | (RefSeq) peroxygenase-like (A)	ko00073: Cutin, suberine and wax biosynthesis	predicted protein [Hordeum vulgare subsp. vulgare]	PXG_ORYSI RecName: Full=Peroxygenase; EC=1.11.2.3;	F2DG99_HORVV SubName: Full=Predicted protein {ECO:0000313|EMBL:BAJ94120.1};	--	GO:0005783,endoplasmic reticulum; GO:0005811,lipid droplet; GO:0016020,membrane; GO:0102070,18-hydroxyoleate peroxygenase activity; GO:0046872,metal ion binding; GO:1990137,plant seed peroxidase activity; GO:0003674,molecular_function; GO:0003824,catalytic activity; GO:0016491,oxidoreductase activity; GO:0016684,oxidoreductase activity, acting on peroxide as acceptor; GO:0005488,binding; GO:00431…	Caleosin related protein	--	--	--
Cluster-104481.0	7.3	7.94	7.45	33.84	35.56	34.97	475	569	476	2094	2579	2144	2.23034	1.15519e-301	2.58197e-299	up	2903	K13754 solute carrier family 24 (sodium/potassium/calcium exchanger), member 6 | (RefSeq) cation/calcium exchanger 1-like (A)	--	cation/calcium exchanger 1-like [Triticum dicoccoides]	CCX1_ARATH RecName: Full=Cation/calcium exchanger 1; Short=AtCCX1; AltName: Full=Protein CATION EXCHANGER 7;	A0A446RPI5_TRITD SubName: Full=Uncharacterized protein {ECO:0000313|EMBL:VAI00779.1};	K+-dependent Na+:Ca2+ antiporter	GO:0016021,integral component of membrane; GO:0016020,membrane; GO:0005774,vacuolar membrane; GO:0015297,antiporter activity; GO:0008324,cation transmembrane transporter activity; GO:0006812,cation transport; GO:0006813,potassium ion transport; GO:0006814,sodium ion transport; GO:0003674,molecular_function; GO:0005215,transporter activity; GO:0015291,secondary active transmembrane transporter act…	Sodium/calcium exchanger protein	--	--	--
Cluster-128504.1	31.79	36.28	37.55	143.89	153.64	145.01	1742	2182	2016	7463	9332	7451	2.09313	3.34331e-301	7.44227e-299	up	2908	K16055 trehalose 6-phosphate synthase/phosphatase [EC:2.4.1.15 3.1.3.12] | (RefSeq) probable alpha,alpha-trehalose-phosphate synthase [UDP-forming] 11 (A)	ko00500: Starch and sucrose metabolism; ko01100: Metabolic pathways; ko01110: Biosynthesis of secondary metabolites	probable alpha,alpha-trehalose-phosphate synthase [UDP-forming]	TPS11_ARATH RecName: Full=Probable alpha,alpha-trehalose-phosphate synthase [UDP-forming] 11; EC=2.4.1.15; AltName: Full=Trehalose-6-phosphate synthase 11; Short=AtTPS11;	A0A453PUN7_AEGTS SubName: Full=Uncharacterized protein {ECO:0000313|EnsemblPlants:AET6Gv20867800.4};	Trehalose-6-phosphate synthase component TPS1 and related subunits	GO:0005739,mitochondrion; GO:0016757,glycosyltransferase activity; GO:0005992,trehalose biosynthetic process; GO:0070413,trehalose metabolism in response to stress; GO:0003674,molecular_function; GO:0003824,catalytic activity; GO:0016740,transferase activity; GO:0005975,carbohydrate metabolic process; GO:0005984,disaccharide metabolic process; GO:0005991,trehalose metabolic process; GO:0008150,bi…	Glycosyltransferase family 20	--	--	--
Cluster-6067.62	84	77.1	87.03	327.86	328.64	313.66	1141	1142	1161	4143	4824	3932	1.96731	3.77027e-301	8.35871e-299	up	848	K25108 licheninase [EC:3.2.1.73] | (RefSeq) lichenase-2 (A)	--	hypothetical protein ZWY2020_026869 [Hordeum vulgare]	E13B_HORVU RecName: Full=Glucan endo-1,3-beta-glucosidase GII; EC=3.2.1.39 {ECO:0000269|PubMed:8514770}; AltName: Full=(1->3)-beta-glucan endohydrolase GII; AltName: Full=(1->3)-beta-glucanase isoenzyme GII; AltName: Full=Beta-1,3-endoglucanase GII; Flags: Precursor;	A0A287MJH1_HORVV SubName: Full=Uncharacterized protein {ECO:0000313|EnsemblPlants:HORVU.MOREX.r3.3HG0318900.1};	--	GO:0042973,glucan endo-1,3-beta-D-glucosidase activity; GO:0006076,(1->3)-beta-D-glucan catabolic process; GO:0050832,defense response to fungus; GO:0003674,molecular_function; GO:0003824,catalytic activity; GO:0004553,hydrolase activity, hydrolyzing O-glycosyl compounds; GO:0008422,beta-glucosidase activity; GO:0015926,glucosidase activity; GO:0016787,hydrolase activity; GO:0016798,hydrolase act…	Glycosyl hydrolases family 17	--	--	--
Cluster-92586.0	7.57	6.16	7.67	71.43	70.71	74.55	185	165	184	1659	1922	1708	3.37273	8.21607e-301	1.81416e-298	up	1292	--	--	uncharacterized protein LOC109772069 [Aegilops tauschii subsp. strangulata]	--	M8BR46_AEGTA SubName: Full=Uncharacterized protein {ECO:0000313|EMBL:EMT24258.1, ECO:0000313|EnsemblPlants:EMT24258};	--	--	--	--	--	--
Cluster-119852.5	17.4	16.58	18.54	56.12	57.81	57.58	1388	1457	1452	4259	5142	4331	1.73936	1.6423e-299	3.61173e-297	up	3490	K14497 protein phosphatase 2C [EC:3.1.3.16] | (RefSeq) probable protein phosphatase 2C 9 (A)	ko04016: MAPK signaling pathway - plant; ko04075: Plant hormone signal transduction	unnamed protein product [Triticum turgidum subsp. durum]	P2C09_ORYSJ RecName: Full=Probable protein phosphatase 2C 9; Short=OsPP2C09; EC=3.1.3.16;	A0A446Q571_TRITD RecName: Full=Protein-serine/threonine phosphatase {ECO:0000256|ARBA:ARBA00013081}; EC=3.1.3.16 {ECO:0000256|ARBA:ARBA00013081};	Serine/threonine protein phosphatase	GO:0016021,integral component of membrane; GO:0005634,nucleus; GO:0046872,metal ion binding; GO:0017018,myosin phosphatase activity; GO:0004722,protein serine/threonine phosphatase activity; GO:0035970,peptidyl-threonine dephosphorylation; GO:0003674,molecular_function; GO:0005488,binding; GO:0043167,ion binding; GO:0043169,cation binding; GO:0003824,catalytic activity; GO:0004721,phosphoprotein …	Protein phosphatase 2C	--	--	--
Cluster-25950.1	53.22	46.38	48.55	227.04	225.81	234.09	1756	1683	1575	7074	8299	7234	2.23639	1.70523e-299	3.73513e-297	up	1626	K17506 protein phosphatase 1L [EC:3.1.3.16] | (RefSeq) probable protein phosphatase 2C 32 (A)	--	probable protein phosphatase 2C 32 [Triticum dicoccoides]	P2C32_ORYSJ RecName: Full=Probable protein phosphatase 2C 32; Short=OsPP2C32; EC=3.1.3.16;	A0A453AJX0_AEGTS RecName: Full=Protein-serine/threonine phosphatase {ECO:0000256|ARBA:ARBA00013081}; EC=3.1.3.16 {ECO:0000256|ARBA:ARBA00013081};	Serine/threonine protein phosphatase	GO:0016021,integral component of membrane; GO:0046872,metal ion binding; GO:0017018,myosin phosphatase activity; GO:0006470,protein dephosphorylation; GO:0003674,molecular_function; GO:0005488,binding; GO:0043167,ion binding; GO:0043169,cation binding; GO:0003824,catalytic activity; GO:0004721,phosphoprotein phosphatase activity; GO:0004722,protein serine/threonine phosphatase activity; GO:001678…	Protein phosphatase 2C	--	--	--
Cluster-76134.0	101.91	100.95	102.23	27.03	26.4	26.88	2534	2750	2501	635	717	622	-1.91406	3.54774e-298	7.74001e-296	down	1311	K24028 salicylic acid 3-hydroxylase [EC:1.14.11.-] | (RefSeq) protein DMR6-LIKE OXYGENASE 1-like (A)	--	jasmonate-induced oxygenase 2 [Aegilops tauschii subsp. strangulata]	JOX2_ARATH RecName: Full=Jasmonate-induced oxygenase 2 {ECO:0000303|PubMed:28559313}; EC=1.14.11.- {ECO:0000269|PubMed:28559313, ECO:0000269|PubMed:28760569, ECO:0000269|PubMed:33516967}; AltName: Full=2-oxoglutarate-dependent dioxygenase JOX2 {ECO:0000305}; AltName: Full=Jasmonic acid oxidase 2 {ECO:0000303|PubMed:28760569};	A0A453HF26_AEGTS RecName: Full=Fe2OG dioxygenase domain-containing protein {ECO:0000259|PROSITE:PS51471};	Iron/ascorbate family oxidoreductases	GO:0005829,cytosol; GO:0051213,dioxygenase activity; GO:0005506,iron ion binding; GO:0120091,jasmonic acid hydrolase; GO:0097237,cellular response to toxic substance; GO:0006952,defense response; GO:1900366,negative regulation of defense response to insect; GO:1900150,regulation of defense response to fungus; GO:2000022,regulation of jasmonic acid mediated signaling pathway; GO:0003674,molecular_…	2OG-Fe(II) oxygenase superfamily	--	--	--
Cluster-117122.0	454.58	428.75	437.62	147.11	145.22	142.99	9818	10138	9279	3004	3471	2878	-1.58057	1.48281e-297	3.22217e-295	down	1449	K02906 large subunit ribosomal protein L3 | (RefSeq) 50S ribosomal protein L3, chloroplastic-like (A)	ko03010: Ribosome	50S ribosomal protein L3, chloroplastic [Triticum urartu]	RK3_SPIOL RecName: Full=50S ribosomal protein L3, chloroplastic {ECO:0000303|PubMed:10874046}; AltName: Full=Chloroplastic large ribosomal subunit protein uL3c {ECO:0000303|PubMed:28007896}; Flags: Precursor;	A0A453N8P8_AEGTS SubName: Full=Uncharacterized protein {ECO:0000313|EnsemblPlants:AET6Gv20275400.1};	Mitochondrial/chloroplast ribosomal protein L3	GO:0009507,chloroplast; GO:0005840,ribosome; GO:0019843,rRNA binding; GO:0003735,structural constituent of ribosome; GO:0006412,translation; GO:0003674,molecular_function; GO:0003676,nucleic acid binding; GO:0003723,RNA binding; GO:0005488,binding; GO:0097159,organic cyclic compound binding; GO:1901363,heterocyclic compound binding; GO:0005198,structural molecule activity; GO:0006518,peptide meta…	Ribosomal protein L3	--	--	--
Cluster-99280.6	101.61	105.29	108.01	251.54	253.78	237.59	6217	7155	6641	15179	17854	14176	1.3019	1.08812e-296	2.35517e-294	up	3155	K17987 next to BRCA1 gene 1 protein | (RefSeq) protein JOKA2 (A)	--	protein JOKA2 [Triticum aestivum]	JOKA2_SOLTU RecName: Full=Protein JOKA2 {ECO:0000303|PubMed:26765567}; AltName: Full=Protein NBR1 homolog {ECO:0000305};	A0A446VF65_TRITD SubName: Full=Uncharacterized protein {ECO:0000313|EMBL:VAI46518.1};	Uncharacterized conserved protein	GO:0005776,autophagosome; GO:0031410,cytoplasmic vesicle; GO:0008270,zinc ion binding; GO:0006914,autophagy; GO:0050832,defense response to fungus; GO:0015031,protein transport; GO:0003674,molecular_function; GO:0005488,binding; GO:0043167,ion binding; GO:0043169,cation binding; GO:0046872,metal ion binding; GO:0046914,transition metal ion binding; GO:0008150,biological_process; GO:0008152,metabo…	Ig-like domain from next to BRCA1 gene	--	--	--
Cluster-110184.5	2.78	3.7	3.76	65.62	62.58	62.12	61	89	81	1373	1533	1281	4.247	1.87653e-296	4.04563e-294	up	1189	--	--	membrane protein PM19L-like [Triticum dicoccoides]	PM19L_ORYSJ RecName: Full=Membrane protein PM19L {ECO:0000305}; AltName: Full=PM19-like protein 1 {ECO:0000303|PubMed:26505346}; Short=OsPM19L1 {ECO:0000303|PubMed:26505346};	A0A3B6I1C4_WHEAT SubName: Full=PM19-A2 {ECO:0000313|EMBL:AKC34100.1};	--	GO:0016021,integral component of membrane; GO:0005575,cellular_component; GO:0016020,membrane; GO:0031224,intrinsic component of membrane; GO:0110165,cellular anatomical entity	AWPM-19-like family	--	--	--
Cluster-118746.3	8.64	8.65	6.57	98	97.06	102.43	896	989	670	9683	11239	10034	3.66955	2.44587e-296	5.25239e-294	up	4448	K00827 alanine-glyoxylate transaminase / (R)-3-amino-2-methylpropionate-pyruvate transaminase [EC:2.6.1.44 2.6.1.40] | (RefSeq) alanine--glyoxylate aminotransferase 2 homolog 3, mitochondrial-like (A)	ko00250: Alanine, aspartate and glutamate metabolism; ko00260: Glycine, serine and threonine metabolism; ko00270: Cysteine and methionine metabolism; ko00280: Valine, leucine and isoleucine degradation; ko01100: Metabolic pathways; ko01110: Biosynthesis of secondary metabolites	TOM1-like protein 7 [Triticum urartu]	AGT23_ARATH RecName: Full=Alanine--glyoxylate aminotransferase 2 homolog 3, mitochondrial; EC=2.6.1.44; AltName: Full=Beta-alanine-pyruvate aminotransferase 3; Flags: Precursor;	A0A3B5ZXQ4_WHEAT SubName: Full=Uncharacterized protein {ECO:0000313|EnsemblPlants:TraesCS1D02G292400.3};	Alanine-glyoxylate aminotransferase AGT2	GO:0005739,mitochondrion; GO:0008453,alanine-glyoxylate transaminase activity; GO:0030170,pyridoxal phosphate binding; GO:0043562,cellular response to nitrogen levels; GO:0009853,photorespiration; GO:0003674,molecular_function; GO:0003824,catalytic activity; GO:0008483,transaminase activity; GO:0016740,transferase activity; GO:0016769,transferase activity, transferring nitrogenous groups; GO:0005…	Aminotransferase class-III	--	--	--
Cluster-122140.2	17.95	17.02	19.62	74.6	72.72	70.88	867	904	931	3423	3911	3219	2.02899	3.4848e-295	7.45421e-293	up	2234	K10875 DNA repair and recombination protein RAD54 and RAD54-like protein [EC:5.6.2.-] | (RefSeq) protein CHROMATIN REMODELING 25-like (A)	ko03440: Homologous recombination	uncharacterized protein LOC109749544 isoform X1 [Aegilops tauschii subsp. strangulata]	--	A0A453FQ71_AEGTS SubName: Full=Uncharacterized protein {ECO:0000313|EnsemblPlants:AET3Gv20743400.3};	--	--	--	--	--	--
Cluster-96381.3	13.93	12.63	14.31	67.92	63.88	67.51	637	636	643	2953	3254	2905	2.31586	9.28058e-295	1.97745e-292	up	2133	--	--	unnamed protein product [Triticum aestivum]	--	A0A453CQP2_AEGTS RecName: Full=EF-hand domain-containing protein {ECO:0000259|PROSITE:PS50222};	--	GO:0005509,calcium ion binding; GO:0003674,molecular_function; GO:0005488,binding; GO:0043167,ion binding; GO:0043169,cation binding; GO:0046872,metal ion binding	EF-hand domain pair	--	--	--
Cluster-121830.1	256.34	259.04	259.7	119.81	115.21	118.36	10162	11285	10109	4505	5078	4404	-1.1071	1.20915e-294	2.56641e-292	down	2059	K02945 small subunit ribosomal protein S1 | (RefSeq) 30S ribosomal protein S1, chloroplastic-like (A)	ko03010: Ribosome	hypothetical protein CFC21_061827, partial [Triticum aestivum]	RR1_SPIOL RecName: Full=30S ribosomal protein S1, chloroplastic {ECO:0000303|PubMed:10874039}; AltName: Full=CS1; AltName: Full=Chloroplastic small ribosomal subunit protein bS1c {ECO:0000303|PubMed:28007896}; Flags: Precursor;	A0A453I7H0_AEGTS RecName: Full=S1 motif domain-containing protein {ECO:0000259|PROSITE:PS50126};	--	GO:0009507,chloroplast; GO:0022627,cytosolic small ribosomal subunit; GO:0003729,mRNA binding; GO:0003735,structural constituent of ribosome; GO:0006412,translation; GO:0003674,molecular_function; GO:0003676,nucleic acid binding; GO:0003723,RNA binding; GO:0005488,binding; GO:0097159,organic cyclic compound binding; GO:1901363,heterocyclic compound binding; GO:0005198,structural molecule activity…	S1 RNA binding domain	--	--	--
Cluster-73413.2	54.97	51.42	52.64	187.87	178.38	192.42	3695	3812	3477	12016	13381	12199	1.84277	2.12328e-294	4.48922e-292	up	3588	K03676 glutaredoxin 3 | (RefSeq) glutaredoxin-C6-like (A)	--	uncharacterized protein LOC123053867 [Triticum aestivum]	GRXC6_ORYSJ RecName: Full=Glutaredoxin-C6; AltName: Full=Glutaredoxin-C2 homolog 1;	A0A3B6DGH8_WHEAT SubName: Full=Uncharacterized protein {ECO:0000313|EnsemblPlants:TraesCS2D02G361500.1.cds1};	Glutaredoxin and related proteins	GO:0005737,cytoplasm; GO:0015038,glutathione disulfide oxidoreductase activity; GO:0097573,glutathione oxidoreductase activity; GO:0004362,glutathione-disulfide reductase (NADPH) activity; GO:0034599,cellular response to oxidative stress; GO:0003674,molecular_function; GO:0003824,catalytic activity; GO:0015036,disulfide oxidoreductase activity; GO:0016491,oxidoreductase activity; GO:0016667,oxido…	Glutaredoxin	NAC	TF	NAC
Cluster-354.12	2936.47	2830.46	2829.87	1041.21	1011.39	1060.86	27816	29090	26328	9221	10484	9172	-1.46132	6.25988e-294	1.31843e-291	down	684	K01602 ribulose-bisphosphate carboxylase small chain [EC:4.1.1.39] | (RefSeq) ribulose bisphosphate carboxylase small subunit, chloroplastic 2 (A)	ko00630: Glyoxylate and dicarboxylate metabolism; ko00710: Carbon fixation in photosynthetic organisms; ko01100: Metabolic pathways; ko01110: Biosynthesis of secondary metabolites; ko01200: Carbon metabolism	ribulose bisphosphate carboxylase small subunit, chloroplastic 2 [Aegilops tauschii subsp. strangulata]	RBS2_WHEAT RecName: Full=Ribulose bisphosphate carboxylase small subunit, chloroplastic 2 {ECO:0000255|HAMAP-Rule:MF_00860}; Short=RuBisCO small subunit 2 {ECO:0000255|HAMAP-Rule:MF_00860}; Flags: Precursor;	W5C9Y4_WHEAT RecName: Full=Ribulose bisphosphate carboxylase small subunit, chloroplastic {ECO:0000256|HAMAP-Rule:MF_00860}; Short=RuBisCO small subunit {ECO:0000256|HAMAP-Rule:MF_00860};	--	GO:0009507,chloroplast; GO:0009853,photorespiration; GO:0019253,reductive pentose-phosphate cycle; GO:0008150,biological_process; GO:0008152,metabolic process; GO:0009987,cellular process; GO:0043094,cellular metabolic compound salvage; GO:0044237,cellular metabolic process; GO:0005975,carbohydrate metabolic process; GO:0009058,biosynthetic process; GO:0015977,carbon fixation; GO:0015979,photosyn…	Ribulose bisphosphate carboxylase, small chain	--	--	--
Cluster-85479.0	84.99	79.13	73.52	384.04	378.34	393.92	1706	1739	1449	7276	8399	7353	2.30068	7.56901e-294	1.58804e-291	up	1107	--	--	predicted protein [Hordeum vulgare subsp. vulgare]	--	F2D2S8_HORVV SubName: Full=Predicted protein {ECO:0000313|EMBL:BAJ89399.1};	--	--	Collagen triple helix repeat (20 copies)	--	--	--
Cluster-107768.0	6.62	7.35	6.4	84.4	82.45	87.67	111	136	107	1334	1522	1363	3.64355	8.80286e-293	1.83986e-290	up	1465	--	--	uncharacterized protein LOC109771480 [Aegilops tauschii subsp. strangulata]	--	M8CLZ5_AEGTA SubName: Full=Uncharacterized protein {ECO:0000313|EMBL:EMT28437.1, ECO:0000313|EnsemblPlants:EMT28437};	--	--	--	--	--	--
Cluster-512.3	6.7	5.54	4.84	33.66	29.67	33.44	386	421	372	2138	2451	2269	2.60868	4.43766e-292	9.23978e-290	up	3691	K01206 alpha-L-fucosidase [EC:3.2.1.51] | (RefSeq) alpha-L-fucosidase 3 (A)	ko00511: Other glycan degradation	GDSL esterase/lipase ACHE-like [Triticum aestivum]	ACHE_MAIZE RecName: Full=GDSL esterase/lipase ACHE {ECO:0000305}; EC=3.1.1.- {ECO:0000269|PubMed:15980188}; AltName: Full=Acetylcholinesterase {ECO:0000303|PubMed:15980188}; Short=AChE {ECO:0000303|PubMed:15980188}; Flags: Precursor;	A0A3B6GJY0_WHEAT SubName: Full=Uncharacterized protein {ECO:0000313|EnsemblPlants:TraesCS3D02G020600.1};	--	GO:0005576,extracellular region; GO:0052689,carboxylic ester hydrolase activity; GO:0006581,acetylcholine catabolic process; GO:0016042,lipid catabolic process; GO:0003674,molecular_function; GO:0003824,catalytic activity; GO:0016787,hydrolase activity; GO:0016788,hydrolase activity, acting on ester bonds; GO:0001505,regulation of neurotransmitter levels; GO:0006807,nitrogen compound metabolic pr…	GDSL-like Lipase/Acylhydrolase	--	--	--
Cluster-512.7	31.94	29.19	34.74	205.04	203.15	226.48	484	512	577	3116	3805	3124	2.7361	7.00819e-292	1.45367e-289	up	1008	K01206 alpha-L-fucosidase [EC:3.2.1.51] | (RefSeq) hypothetical protein (A)	ko00511: Other glycan degradation	GDSL esterase/lipase ACHE-like [Triticum aestivum]	ACHE_MAIZE RecName: Full=GDSL esterase/lipase ACHE {ECO:0000305}; EC=3.1.1.- {ECO:0000269|PubMed:15980188}; AltName: Full=Acetylcholinesterase {ECO:0000303|PubMed:15980188}; Short=AChE {ECO:0000303|PubMed:15980188}; Flags: Precursor;	A0A3B6EA32_WHEAT SubName: Full=Uncharacterized protein {ECO:0000313|EnsemblPlants:TraesCS3A02G025400.1};	--	GO:0005576,extracellular region; GO:0052689,carboxylic ester hydrolase activity; GO:0006581,acetylcholine catabolic process; GO:0016042,lipid catabolic process; GO:0003674,molecular_function; GO:0003824,catalytic activity; GO:0016787,hydrolase activity; GO:0016788,hydrolase activity, acting on ester bonds; GO:0001505,regulation of neurotransmitter levels; GO:0006807,nitrogen compound metabolic pr…	GDSL-like Lipase/Acylhydrolase	--	--	--
Cluster-45787.9	172	166.89	172.88	433.03	416.57	436.65	4862	5177	4800	11595	13068	11545	1.35358	1.05959e-289	2.18956e-287	up	1434	K01363 cathepsin B [EC:3.4.22.1] | (RefSeq) cathepsin B-like (A)	--	cathepsin B-like protease 2 isoform X2 [Triticum aestivum]	CATB2_ARATH RecName: Full=Cathepsin B-like protease 2 {ECO:0000305}; EC=3.4.22.- {ECO:0000305}; AltName: Full=Cathepsin B2 {ECO:0000305}; Short=AtCathB2 {ECO:0000303|PubMed:19453434}; Flags: Precursor;	A0A453HBG0_AEGTS RecName: Full=Pept_C1 domain-containing protein {ECO:0000259|SMART:SM00645};	Cysteine proteinase Cathepsin L	GO:0005576,extracellular region; GO:0005615,extracellular space; GO:0005764,lysosome; GO:0000325,plant-type vacuole; GO:0004197,cysteine-type endopeptidase activity; GO:0006952,defense response; GO:0051603,proteolysis involved in protein catabolic process; GO:0050790,regulation of catalytic activity; GO:0003674,molecular_function; GO:0003824,catalytic activity; GO:0004175,endopeptidase activity; …	Papain family cysteine protease	--	--	--
Cluster-111166.0	38.06	38.5	36.23	111.99	110.37	111.05	1458	1621	1363	4074	4704	3994	1.59018	3.30918e-288	6.81244e-286	up	1846	K09060 plant G-box-binding factor | (RefSeq) bZIP transcription factor 16 (A)	--	UV-B-induced protein At3g17800, chloroplastic [Aegilops tauschii subsp. strangulata]	UVB31_ARATH RecName: Full=UV-B-induced protein At3g17800, chloroplastic {ECO:0000305}; Flags: Precursor;	M8AHV4_AEGTA SubName: Full=Uncharacterized protein {ECO:0000313|EMBL:EMT04061.1, ECO:0000313|EnsemblPlants:EMT04061};	--	GO:0009507,chloroplast; GO:0010193,response to ozone; GO:0010224,response to UV-B; GO:0009611,response to wounding; GO:0000302,response to reactive oxygen species; GO:0006950,response to stress; GO:0006979,response to oxidative stress; GO:0008150,biological_process; GO:0010035,response to inorganic substance; GO:0042221,response to chemical; GO:0050896,response to stimulus; GO:1901700,response to…	Protein of unknown function (DUF760)	--	--	--
Cluster-107021.1	225.27	216.44	217.87	548.28	547.07	544.75	3099	3247	2943	7095	8290	6919	1.32801	5.70005e-288	1.16904e-285	up	855	K25108 licheninase [EC:3.2.1.73] | (RefSeq) lichenase-2 (A)	--	Lichenase-2 [Triticum urartu]	GUB2_HORVU RecName: Full=Lichenase-2; EC=3.2.1.73; AltName: Full=(1->3,1->4)-beta-glucanase isoenzyme EII; AltName: Full=Endo-beta-1,3-1,4 glucanase II; AltName: Full=Lichenase II; Flags: Precursor; Fragment;	M7YWE0_TRIUA SubName: Full=Lichenase-2 {ECO:0000313|EMBL:EMS51456.1, ECO:0000313|EnsemblPlants:TRIUR3_32481-P1};	--	GO:0042972,licheninase activity; GO:0005975,carbohydrate metabolic process; GO:0003674,molecular_function; GO:0003824,catalytic activity; GO:0004553,hydrolase activity, hydrolyzing O-glycosyl compounds; GO:0016787,hydrolase activity; GO:0016798,hydrolase activity, acting on glycosyl bonds; GO:0008150,biological_process; GO:0008152,metabolic process; GO:0044238,primary metabolic process; GO:007170…	Glycosyl hydrolases family 17	--	--	--
Cluster-110860.6	72.77	71.67	64.94	304.47	316	325.59	1158	1246	1015	4566	5550	4800	2.19121	1.49919e-287	3.06327e-285	up	941	K24917 amino acid permease | (RefSeq) amino acid permease 3-like (A)	--	amino acid permease [Hordeum vulgare]	AAP3_ARATH RecName: Full=Amino acid permease 3; AltName: Full=Amino acid transporter AAP3;	A0A446R4S0_TRITD SubName: Full=Uncharacterized protein {ECO:0000313|EMBL:VAH93911.1};	Amino acid transporters	GO:0016021,integral component of membrane; GO:0016020,membrane; GO:0031965,nuclear membrane; GO:0005886,plasma membrane; GO:0015171,amino acid transmembrane transporter activity; GO:0015174,basic amino acid transmembrane transporter activity; GO:0015293,symporter activity; GO:0003333,amino acid transmembrane transport; GO:0015802,basic amino acid transport; GO:0006952,defense response; GO:0003674…	Transmembrane amino acid transporter protein	--	--	--
Cluster-131025.8	5.57	5.79	4.28	57.37	57.89	59.27	190	217	143	1856	2195	1893	3.50192	4.14217e-287	8.43216e-285	up	1668	K14498 serine/threonine-protein kinase SRK2 [EC:2.7.11.1] | (RefSeq) abscisic acid-inducible protein kinase isoform X1 (A)	ko04016: MAPK signaling pathway - plant; ko04075: Plant hormone signal transduction	abscisic acid-inducible protein kinase [Triticum aestivum]	AAIP_WHEAT RecName: Full=Abscisic acid-inducible protein kinase; EC=2.7.11.1; Flags: Fragment;	A0A453D4L0_AEGTS RecName: Full=Protein kinase domain-containing protein {ECO:0000259|PROSITE:PS50011};	Serine/threonine protein kinase	GO:0005524,ATP binding; GO:0106310,protein serine kinase activity; GO:0004674,protein serine/threonine kinase activity; GO:0035556,intracellular signal transduction; GO:0006468,protein phosphorylation; GO:0000166,nucleotide binding; GO:0003674,molecular_function; GO:0005488,binding; GO:0017076,purine nucleotide binding; GO:0030554,adenyl nucleotide binding; GO:0032553,ribonucleotide binding; GO:0…	Protein kinase domain	--	--	--
Cluster-113474.9	13.03	13.18	13.95	45.7	47.14	46.46	700	779	735	2332	2818	2347	1.82399	8.22488e-287	1.66813e-284	up	2449	K13863 solute carrier family 7 (cationic amino acid transporter), member 1 | (RefSeq) cationic amino acid transporter 2, vacuolar-like (A)	--	High affinity cationic amino acid transporter 1 [Hordeum vulgare]	CAAT2_ARATH RecName: Full=Cationic amino acid transporter 2, vacuolar;	F2DF37_HORVV SubName: Full=Predicted protein {ECO:0000313|EMBL:BAJ93708.1};	Amino acid transporters	GO:0016021,integral component of membrane; GO:0000325,plant-type vacuole; GO:0009705,plant-type vacuole membrane; GO:0015171,amino acid transmembrane transporter activity; GO:0080144,amino acid homeostasis; GO:0006865,amino acid transport; GO:0003674,molecular_function; GO:0005215,transporter activity; GO:0005342,organic acid transmembrane transporter activity; GO:0022857,transmembrane transporte…	Amino acid permease	--	--	--
Cluster-34218.0	2.16	2.22	3.02	36.64	37.92	39.42	84	84	113	1425	1672	1444	4.0785	1.74337e-284	3.52276e-282	up	2373	--	--	embryonic protein DC-8 [Hordeum vulgare subsp. vulgare]	--	F2D9B2_HORVV SubName: Full=Predicted protein {ECO:0000313|EMBL:BAJ91683.1};	Uncharacterized conserved protein	GO:0016021,integral component of membrane; GO:0005575,cellular_component; GO:0016020,membrane; GO:0031224,intrinsic component of membrane; GO:0110165,cellular anatomical entity	Domain of unknown function (DUF4149)	--	--	--
Cluster-99911.3	10.16	10.11	8.72	63.38	67.85	67.09	329	360	278	1951	2447	2041	2.79989	9.20998e-284	1.85419e-281	up	1602	K00475 naringenin 3-dioxygenase [EC:1.14.11.9] | (RefSeq) naringenin,2-oxoglutarate 3-dioxygenase (A)	ko00941: Flavonoid biosynthesis; ko01100: Metabolic pathways; ko01110: Biosynthesis of secondary metabolites	unnamed protein product [Triticum turgidum subsp. durum]	FL3H_HORVU RecName: Full=Naringenin,2-oxoglutarate 3-dioxygenase; EC=1.14.11.9 {ECO:0000250|UniProtKB:Q7XZQ7}; AltName: Full=FHT; AltName: Full=Flavanone-3-hydroxylase; Short=F3H;	A0A446LIF1_TRITD RecName: Full=Fe2OG dioxygenase domain-containing protein {ECO:0000259|PROSITE:PS51471};	Iron/ascorbate family oxidoreductases	GO:0031418,L-ascorbic acid binding; GO:0046872,metal ion binding; GO:0045486,naringenin 3-dioxygenase activity; GO:0009813,flavonoid biosynthetic process; GO:0003674,molecular_function; GO:0005488,binding; GO:0019842,vitamin binding; GO:0030246,carbohydrate binding; GO:0031406,carboxylic acid binding; GO:0036094,small molecule binding; GO:0043167,ion binding; GO:0043168,anion binding; GO:0043177,…	2OG-Fe(II) oxygenase superfamily	--	--	--
Cluster-109992.1	617.91	615.12	556.72	99.39	102.63	112.85	8977	9729	7962	1357	1623	1511	-2.50142	2.86078e-283	5.73833e-281	down	910	K11855 ubiquitin carboxyl-terminal hydrolase 36/42 [EC:3.4.19.12] | (RefSeq) ubiquitin carboxyl-terminal hydrolase 36 (A)	--	hypothetical protein D1007_02448 [Hordeum vulgare]	PRF1_SOLLC RecName: Full=36.4 kDa proline-rich protein;	A0A446MMD9_TRITD RecName: Full=AAI domain-containing protein {ECO:0000259|SMART:SM00499};	--	--	Hydrophobic seed protein	--	--	--
Cluster-5128.5	8.03	8.71	7.96	56.76	63.19	54.4	449	535	443	3012	3939	2813	2.8341	7.87844e-283	1.57454e-280	up	2974	K15086 (3S)-linalool synthase [EC:4.2.3.25] | (RefSeq) S-(+)-linalool synthase, chloroplastic-like (A)	ko00902: Monoterpenoid biosynthesis; ko01110: Biosynthesis of secondary metabolites	unnamed protein product [Triticum turgidum subsp. durum]	LINS_ORYSJ RecName: Full=S-(+)-linalool synthase, chloroplastic {ECO:0000305}; Short=OsLIS {ECO:0000303|PubMed:23889289}; EC=4.2.3.25 {ECO:0000305}; Flags: Precursor;	A0A446V3V2_TRITD SubName: Full=Uncharacterized protein {ECO:0000313|EMBL:VAI42535.1};	--	GO:0009507,chloroplast; GO:0000287,magnesium ion binding; GO:0034007,S-linalool synthase activity; GO:0010333,terpene synthase activity; GO:0042742,defense response to bacterium; GO:0043693,monoterpene biosynthetic process; GO:0016114,terpenoid biosynthetic process; GO:0003674,molecular_function; GO:0005488,binding; GO:0043167,ion binding; GO:0043169,cation binding; GO:0046872,metal ion binding; …	Terpene synthase family, metal binding domain	--	--	--
Cluster-122754.6	17.52	14.63	17.39	96.59	100.67	98.42	479	439	467	2501	3054	2516	2.60344	1.06468e-280	2.12006e-278	up	1397	K06185 ATP-binding cassette, subfamily F, member 2 | (RefSeq) ABC transporter F family member 1-like (A)	--	unnamed protein product [Triticum turgidum subsp. durum]	AB1F_ARATH RecName: Full=ABC transporter F family member 1; Short=ABC transporter ABCF.1; Short=AtABCF1; AltName: Full=GCN20-type ATP-binding cassette protein GCN1;	A0A453GYN5_AEGTS RecName: Full=ABC transporter domain-containing protein {ECO:0000259|PROSITE:PS50893};	Predicted transporter (ABC superfamily)	GO:0009536,plastid; GO:0005524,ATP binding; GO:0000166,nucleotide binding; GO:0003674,molecular_function; GO:0005488,binding; GO:0017076,purine nucleotide binding; GO:0030554,adenyl nucleotide binding; GO:0032553,ribonucleotide binding; GO:0032555,purine ribonucleotide binding; GO:0032559,adenyl ribonucleotide binding; GO:0035639,purine ribonucleoside triphosphate binding; GO:0036094,small molecu…	ABC transporter	--	--	--
Cluster-132500.0	6.3	5.47	6.02	51.64	49.63	49.25	178	171	165	1380	1563	1300	3.10987	1.2548e-280	2.48959e-278	up	1546	--	--	uncharacterized protein LOC119291540 [Triticum dicoccoides]	--	A0A3B6IUX2_WHEAT SubName: Full=Uncharacterized protein {ECO:0000313|EnsemblPlants:TraesCS4B02G283800.1};	--	--	Protein of unknown function (DUF1997)	--	--	--
Cluster-90412.0	17.65	21.53	20.45	123.68	133.35	119.01	489	655	557	3249	4105	3087	2.68109	1.47959e-280	2.92499e-278	up	1413	K13071 pheophorbide a oxygenase [EC:1.14.15.17] | (RefSeq) pheophorbide a oxygenase, chloroplastic (A)	ko00860: Porphyrin metabolism; ko01110: Biosynthesis of secondary metabolites	unnamed protein product [Triticum turgidum subsp. durum]	PAO_ORYSJ RecName: Full=Pheophorbide a oxygenase, chloroplastic {ECO:0000303|PubMed:21807436}; Short=OsPaO {ECO:0000303|PubMed:21807436}; Short=Pheide a oxygenase {ECO:0000305}; EC=1.14.15.17 {ECO:0000250|UniProtKB:Q9FYC2}; Flags: Precursor;	A0A453J0A8_AEGTS RecName: Full=Rieske domain-containing protein {ECO:0000259|PROSITE:PS51296};	--	GO:0009507,chloroplast; GO:0005737,cytoplasm; GO:0051537,2 iron, 2 sulfur cluster binding; GO:0010277,chlorophyllide a oxygenase [overall] activity; GO:0046872,metal ion binding; GO:0016491,oxidoreductase activity; GO:0032441,pheophorbide a oxygenase activity; GO:0008219,cell death; GO:0015996,chlorophyll catabolic process; GO:0042742,defense response to bacterium; GO:0009908,flower development; …	Pheophorbide a oxygenase	--	--	--
Cluster-130483.3	28.78	34.74	29.71	166.14	174.76	165.78	741	981	751	4051	4993	3989	2.46475	3.55439e-280	7.00139e-278	up	1334	K14498 serine/threonine-protein kinase SRK2 [EC:2.7.11.1] | (RefSeq) serine/threonine-protein kinase SAPK4 (A)	ko04016: MAPK signaling pathway - plant; ko04075: Plant hormone signal transduction	serine/threonine-protein kinase SAPK4 [Artibeus jamaicensis]	SAPK4_ORYSJ RecName: Full=Serine/threonine-protein kinase SAPK4; EC=2.7.11.1; AltName: Full=Osmotic stress/abscisic acid-activated protein kinase 4; AltName: Full=RK2 kinase {ECO:0000312|EMBL:AFK74500.1}; AltName: Full=stress-activated protein kinase 4 {ECO:0000303|Ref.8}; Short=OsSAPK4 {ECO:0000303|Ref.8};	A0A446NWI3_TRITD RecName: Full=Protein kinase domain-containing protein {ECO:0000259|PROSITE:PS50011};	Serine/threonine protein kinase	GO:0005737,cytoplasm; GO:0005634,nucleus; GO:0005524,ATP binding; GO:0106310,protein serine kinase activity; GO:0004674,protein serine/threonine kinase activity; GO:0009738,abscisic acid-activated signaling pathway; GO:0035556,intracellular signal transduction; GO:0006468,protein phosphorylation; GO:0000166,nucleotide binding; GO:0003674,molecular_function; GO:0005488,binding; GO:0017076,purine n…	Protein kinase domain	--	--	--
Cluster-78836.0	6.31	6.17	5.56	50.17	56.27	56.49	255	272	219	1917	2515	2133	3.20124	8.87066e-280	1.74107e-277	up	2036	K12600 superkiller protein 3 | (RefSeq) tetratricopeptide repeat protein SKI3 (A)	ko03018: RNA degradation	uncharacterized protein LOC119274823 [Triticum dicoccoides]	TIC32_ARATH RecName: Full=Short-chain dehydrogenase TIC 32, chloroplastic {ECO:0000303|PubMed:15180984}; EC=1.1.1.-; AltName: Full=Translocon at the inner envelope membrane of chloroplasts 32 {ECO:0000303|PubMed:15180984}; Short=AtTIC32 {ECO:0000303|PubMed:15180984};	A0A3B5Y051_WHEAT SubName: Full=Uncharacterized protein {ECO:0000313|EnsemblPlants:TraesCS1A02G207600.1.cds1};	--	GO:0009507,chloroplast; GO:0009941,chloroplast envelope; GO:0009706,chloroplast inner membrane; GO:0005829,cytosol; GO:0005886,plasma membrane; GO:0016491,oxidoreductase activity; GO:0015031,protein transport; GO:0003674,molecular_function; GO:0003824,catalytic activity; GO:0006810,transport; GO:0008104,protein localization; GO:0008150,biological_process; GO:0009987,cellular process; GO:0033036,m…	--	--	--	--
Cluster-106218.0	50.63	51.98	53.94	107.16	108.82	105.62	3522	3979	3689	7089	8444	6921	1.0691	1.48003e-279	2.89452e-277	up	3547	K01115 phospholipase D1/2 [EC:3.1.4.4] | (RefSeq) phospholipase D alpha 1-like (A)	ko00564: Glycerophospholipid metabolism; ko00565: Ether lipid metabolism; ko01100: Metabolic pathways; ko01110: Biosynthesis of secondary metabolites; ko04144: Endocytosis	unnamed protein product [Triticum turgidum subsp. durum]	PLDA1_MAIZE RecName: Full=Phospholipase D alpha 1; Short=PLD alpha 1; EC=3.1.4.4; AltName: Full=Choline phosphatase 1; AltName: Full=Phosphatidylcholine-hydrolyzing phospholipase D 1;	A0A446N8D4_TRITD RecName: Full=Phospholipase D {ECO:0000256|ARBA:ARBA00012027, ECO:0000256|PIRNR:PIRNR036470}; EC=3.1.4.4 {ECO:0000256|ARBA:ARBA00012027, ECO:0000256|PIRNR:PIRNR036470};	Phospholipase D1	GO:0005886,plasma membrane; GO:0005509,calcium ion binding; GO:0070290,N-acylphosphatidylethanolamine-specific phospholipase D activity; GO:0004630,phospholipase D activity; GO:0046470,phosphatidylcholine metabolic process; GO:0009395,phospholipid catabolic process; GO:0003674,molecular_function; GO:0005488,binding; GO:0043167,ion binding; GO:0043169,cation binding; GO:0046872,metal ion binding; …	Phospholipase D C terminal	--	--	--
Cluster-89038.1	5.59	5.78	5.97	44.15	44.1	48.85	235	267	246	1764	2065	1931	3.01348	2.28345e-278	4.44988e-276	up	1986	--	--	hypothetical protein ZWY2020_030017 [Hordeum vulgare]	--	A0A8I6Y539_HORVV SubName: Full=Uncharacterized protein {ECO:0000313|EnsemblPlants:HORVU.MOREX.r3.5HG0427250.1.CDS1};	--	--	--	--	--	--
Cluster-119211.26	74.65	70.27	85.32	431.16	392.5	403.12	743	825	861	3947	4307	3613	2.35393	3.30566e-278	6.41908e-276	up	809	--	--	ricin B-like lectin R40C1 [Hordeum vulgare subsp. vulgare]	40C1_ORYSJ RecName: Full=Ricin B-like lectin R40C1 {ECO:0000305}; AltName: Full=Osr40c1 {ECO:0000303|PubMed:9265787};	M8BEB8_AEGTA RecName: Full=Ricin B-type lectin domain-containing protein {ECO:0000259|PROSITE:PS50231};	--	GO:0030246,carbohydrate binding; GO:0003674,molecular_function; GO:0005488,binding	Ricin-type beta-trefoil lectin domain-like	--	--	--
Cluster-22352.40	1178.4	1235.68	1225.56	387.73	410.96	435.9	8979	10174	9172	2749	3409	3004	-1.56243	1.67301e-277	3.23725e-275	down	610	K08912 light-harvesting complex II chlorophyll a/b binding protein 1 | (RefSeq) chlorophyll a-b binding protein of LHCII type 1-like (A)	ko00196: Photosynthesis - antenna proteins; ko01100: Metabolic pathways	unnamed protein product [Triticum turgidum subsp. durum]	CB22_MAIZE RecName: Full=Chlorophyll a-b binding protein, chloroplastic; AltName: Full=LHCII type I CAB; Short=LHCP; Flags: Precursor;	A0A446J6B2_TRITD RecName: Full=Chlorophyll a-b binding protein, chloroplastic {ECO:0000256|RuleBase:RU363080};	--	GO:0009535,chloroplast thylakoid membrane; GO:0016021,integral component of membrane; GO:0009522,photosystem I; GO:0009523,photosystem II; GO:0016168,chlorophyll binding; GO:0046872,metal ion binding; GO:0009768,photosynthesis, light harvesting in photosystem I; GO:0009416,response to light stimulus; GO:0003674,molecular_function; GO:0005488,binding; GO:0046906,tetrapyrrole binding; GO:0097159,or…	Chlorophyll A-B binding protein	--	--	--
Cluster-128974.11	39.57	45.24	41.91	282.83	296.34	268.67	402	527	454	2844	3466	2562	2.74453	2.36837e-276	4.56661e-274	up	863	K01784 UDP-glucose 4-epimerase [EC:5.1.3.2] | (RefSeq) UDP-glucose 4-epimerase 1 (A)	ko00052: Galactose metabolism; ko00520: Amino sugar and nucleotide sugar metabolism; ko01100: Metabolic pathways; ko01250: Biosynthesis of nucleotide sugars	unnamed protein product [Triticum turgidum subsp. durum]	UGE1_ORYSJ RecName: Full=UDP-glucose 4-epimerase 1; Short=OsUGE-1; EC=5.1.3.2; AltName: Full=UDP-galactose 4-epimerase 1;	A0A453A5G9_AEGTS RecName: Full=NAD(P)-bd_dom domain-containing protein {ECO:0000259|Pfam:PF16363};	UDP-glucose 4-epimerase/UDP-sulfoquinovose synthase	GO:0005829,cytosol; GO:0003723,RNA binding; GO:0003978,UDP-glucose 4-epimerase activity; GO:0006012,galactose metabolic process; GO:0006364,rRNA processing; GO:0003674,molecular_function; GO:0003676,nucleic acid binding; GO:0005488,binding; GO:0097159,organic cyclic compound binding; GO:1901363,heterocyclic compound binding; GO:0003824,catalytic activity; GO:0016853,isomerase activity; GO:0016854…	GDP-mannose 4,6 dehydratase	--	--	--
Cluster-81600.0	167.45	165.67	172.13	57.8	59.57	60.14	3869	4183	3884	1267	1525	1301	-1.47968	1.06976e-275	2.05545e-273	down	1919	--	--	protein FLUORESCENT IN BLUE LIGHT, chloroplastic [Hordeum vulgare subsp. vulgare]	FLU_ARATH RecName: Full=Protein FLUORESCENT IN BLUE LIGHT, chloroplastic; Flags: Precursor;	A0A3B6MP48_WHEAT SubName: Full=Uncharacterized protein {ECO:0000313|EnsemblPlants:TraesCS5D02G179900.2};	--	GO:0031969,chloroplast membrane; GO:0009535,chloroplast thylakoid membrane; GO:0016021,integral component of membrane; GO:0015995,chlorophyll biosynthetic process; GO:0006725,cellular aromatic compound metabolic process; GO:0006778,porphyrin-containing compound metabolic process; GO:0006779,porphyrin-containing compound biosynthetic process; GO:0006807,nitrogen compound metabolic process; GO:0008…	--	--	--	--
Cluster-92704.6	14.52	14.51	14.68	124.73	124.42	129.57	156	181	157	1293	1466	1292	3.10318	1.78665e-275	3.42088e-273	up	1026	K00521 ferric-chelate reductase [EC:1.16.1.7] | (RefSeq) ferric reduction oxidase 7, chloroplastic-like (A)	--	unnamed protein product [Triticum turgidum subsp. durum]	NAC59_ARATH RecName: Full=NAC domain-containing protein 59 {ECO:0000303|PubMed:15029955}; Short=ANAC059 {ECO:0000303|PubMed:15029955}; Short=AtNAC3 {ECO:0000303|PubMed:16359384}; AltName: Full=Protein ORE1 SISTER1 {ECO:0000303|PubMed:21303842};	A0A453AN56_AEGTS RecName: Full=NAC domain-containing protein {ECO:0000259|PROSITE:PS51005};	--	GO:0005634,nucleus; GO:0003700,DNA-binding transcription factor activity; GO:0043565,sequence-specific DNA binding; GO:0000976,transcription cis-regulatory region binding; GO:0010150,leaf senescence; GO:0051091,positive regulation of DNA-binding transcription factor activity; GO:1900057,positive regulation of leaf senescence; GO:0042542,response to hydrogen peroxide; GO:0009611,response to woundi…	No apical meristem (NAM) protein	NAC	TF	NAC
Cluster-110860.8	44.26	50.56	43.26	236.77	257.45	238.68	736	919	706	3714	4730	3682	2.42507	1.83818e-275	3.50727e-273	up	970	K24917 amino acid permease | (RefSeq) amino acid permease 3-like (A)	--	unnamed protein product [Triticum turgidum subsp. durum]	AAP2_ARATH RecName: Full=Amino acid permease 2; AltName: Full=Amino acid transporter AAP2;	A0A446RWR1_TRITD RecName: Full=Aa_trans domain-containing protein {ECO:0000259|Pfam:PF01490};	Amino acid transporters	GO:0005887,integral component of plasma membrane; GO:0016020,membrane; GO:0005886,plasma membrane; GO:0015171,amino acid transmembrane transporter activity; GO:0015293,symporter activity; GO:0015800,acidic amino acid transport; GO:0003333,amino acid transmembrane transport; GO:0006865,amino acid transport; GO:0015804,neutral amino acid transport; GO:0110126,phloem loading; GO:0003674,molecular_fu…	Transmembrane amino acid transporter protein	--	--	--
Cluster-29705.1	21.61	28.58	22.32	113.55	118.53	111.56	735	888	663	3662	4479	3556	2.42094	1.85994e-275	3.53648e-273	up	1663	K08711 ATP-binding cassette, subfamily G (WHITE), member 2, PDR | (RefSeq) ABC transporter G family member 36 (A)	ko02010: ABC transporters	unnamed protein product [Triticum turgidum subsp. durum]	AB36G_ORYSI RecName: Full=ABC transporter G family member 36 {ECO:0000305}; Short=OsABCG36 {ECO:0000305}; AltName: Full=Pleiotropic drug resistance protein 9 {ECO:0000303|PubMed:14572653}; Short=OsPDR9 {ECO:0000303|PubMed:14572653};	A0A453F1B6_AEGTS RecName: Full=ABC2_membrane domain-containing protein {ECO:0000259|Pfam:PF01061};	Pleiotropic drug resistance proteins (PDR1-15), ABC superfamily	GO:0016021,integral component of membrane; GO:0140359,ABC-type transporter activity; GO:0005524,ATP binding; GO:0003674,molecular_function; GO:0005215,transporter activity; GO:0015399,primary active transmembrane transporter activity; GO:0022804,active transmembrane transporter activity; GO:0022857,transmembrane transporter activity; GO:0042626,ATPase-coupled transmembrane transporter activity; G…	ABC-2 type transporter	--	--	--
Cluster-121202.1	243.02	231.77	230.37	69.56	70.91	66.49	5926	6196	5517	1605	1916	1513	-1.74645	1.8847e-275	3.57115e-273	down	1279	K02895 large subunit ribosomal protein L24 | (RefSeq) 50S ribosomal protein L24, chloroplastic (A)	ko03010: Ribosome	50S ribosomal protein L24, chloroplastic [Aegilops tauschii subsp. strangulata]	RK24_PEA RecName: Full=50S ribosomal protein L24, chloroplastic; AltName: Full=CL24; Flags: Precursor;	W5HY47_WHEAT RecName: Full=KOW domain-containing protein {ECO:0000259|SMART:SM00739};	Mitochondrial/chloroplast ribosomal protein L24	GO:0009507,chloroplast; GO:0005840,ribosome; GO:0003729,mRNA binding; GO:0019843,rRNA binding; GO:0003735,structural constituent of ribosome; GO:0032544,plastid translation; GO:0003674,molecular_function; GO:0003676,nucleic acid binding; GO:0003723,RNA binding; GO:0005488,binding; GO:0097159,organic cyclic compound binding; GO:1901363,heterocyclic compound binding; GO:0005198,structural molecule …	Ribosomal proteins 50S L24/mitochondrial 39S L24	--	--	--
Cluster-22352.81	15487.9	15796.9	15488.7	7641.02	7993.48	7970.85	44162	47491	43401	19720	24068	19475	-1.03165	2.81047e-275	5.30694e-273	down	414	K08912 light-harvesting complex II chlorophyll a/b binding protein 1 | (RefSeq) chlorophyll a-b binding protein of LHCII type 1-like (A)	ko00196: Photosynthesis - antenna proteins; ko01100: Metabolic pathways	unnamed protein product [Triticum turgidum subsp. durum]	CB21_MAIZE RecName: Full=Chlorophyll a-b binding protein 1, chloroplastic; AltName: Full=LHCII type I CAB-1; Short=LHCP; Flags: Precursor;	A0A446TBT8_TRITD RecName: Full=Chlorophyll a-b binding protein, chloroplastic {ECO:0000256|RuleBase:RU363080};	--	GO:0009535,chloroplast thylakoid membrane; GO:0016021,integral component of membrane; GO:0009522,photosystem I; GO:0009523,photosystem II; GO:0016168,chlorophyll binding; GO:0046872,metal ion binding; GO:0009768,photosynthesis, light harvesting in photosystem I; GO:0009416,response to light stimulus; GO:0003674,molecular_function; GO:0005488,binding; GO:0046906,tetrapyrrole binding; GO:0097159,or…	Chlorophyll A-B binding protein	--	--	--
Cluster-1939.6	3.24	3.95	3.74	26.63	24.12	21.63	284	373	319	1939	2408	1839	2.72746	1.35151e-273	2.54325e-271	up	5212	K00921 1-phosphatidylinositol-3-phosphate 5-kinase [EC:2.7.1.150] | (RefSeq) putative 1-phosphatidylinositol-3-phosphate 5-kinase FAB1D (A)	ko00562: Inositol phosphate metabolism; ko01100: Metabolic pathways; ko04070: Phosphatidylinositol signaling system; ko04145: Phagosome	putative 1-phosphatidylinositol-3-phosphate 5-kinase FAB1D [Triticum aestivum]	FAB1D_ARATH RecName: Full=Putative 1-phosphatidylinositol-3-phosphate 5-kinase FAB1D; Short=Phosphatidylinositol 3-phosphate 5-kinase; EC=2.7.1.150; AltName: Full=Phosphatidylinositol 3-phosphate 5-kinase type III; Short=PIPkin-III; Short=Type III PIP kinase; AltName: Full=Protein FORMS APLOID AND BINUCLEATE CELLS 1D;	A0A3B6CHI3_WHEAT RecName: Full=1-phosphatidylinositol-3-phosphate 5-kinase {ECO:0000256|ARBA:ARBA00012009}; EC=2.7.1.150 {ECO:0000256|ARBA:ARBA00012009};	Phosphatidylinositol-4-phosphate 5-kinase and related FYVE finger-containing proteins	GO:0010008,endosome membrane; GO:0000285,1-phosphatidylinositol-3-phosphate 5-kinase activity; GO:0005524,ATP binding; GO:0046854,phosphatidylinositol phosphate biosynthetic process; GO:0016310,phosphorylation; GO:0003674,molecular_function; GO:0003824,catalytic activity; GO:0016301,kinase activity; GO:0016307,phosphatidylinositol phosphate kinase activity; GO:0016740,transferase activity; GO:001…	Phosphatidylinositol-4-phosphate 5-Kinase	--	--	--
Cluster-141497.3	13.37	11.92	10.53	101.11	104.11	109.61	308	301	238	2207	2662	2359	3.15903	1.23242e-271	2.31121e-269	up	2387	K22013 magnesium dechelatase [EC:4.99.1.10] | (RefSeq) protein STAY-GREEN, chloroplastic-like (A)	ko00860: Porphyrin metabolism; ko01110: Biosynthesis of secondary metabolites	protein STAY-GREEN, chloroplastic-like [Triticum dicoccoides]	SGR_ORYSI RecName: Full=Protein STAY-GREEN, chloroplastic; AltName: Full=Protein STAYGREEN; Flags: Precursor;	A0A446TA51_TRITD RecName: Full=Staygreen domain-containing protein {ECO:0000259|Pfam:PF12638};	--	GO:0009507,chloroplast; GO:0005575,cellular_component; GO:0005622,intracellular anatomical structure; GO:0005737,cytoplasm; GO:0009536,plastid; GO:0043226,organelle; GO:0043227,membrane-bounded organelle; GO:0043229,intracellular organelle; GO:0043231,intracellular membrane-bounded organelle; GO:0110165,cellular anatomical entity	Staygreen protein	--	--	--
Cluster-125893.2	95.51	94.89	94.77	322.27	313.96	330.89	1918	2069	1808	6025	6845	6254	1.79091	1.85694e-271	3.47052e-269	up	1119	K00600 glycine hydroxymethyltransferase [EC:2.1.2.1] | (RefSeq) serine hydroxymethyltransferase 4-like (A)	ko00260: Glycine, serine and threonine metabolism; ko00460: Cyanoamino acid metabolism; ko00630: Glyoxylate and dicarboxylate metabolism; ko00670: One carbon pool by folate; ko01100: Metabolic pathways; ko01110: Biosynthesis of secondary metabolites; ko01200: Carbon metabolism; ko01230: Biosynthesis of amino acids; ko01240: Biosynthesis of cofactors	glutathione transferase FosA-like [Triticum aestivum]	--	A0A453H124_AEGTS RecName: Full=VOC domain-containing protein {ECO:0000259|PROSITE:PS51819};	Glyoxalase	--	Glyoxalase/Bleomycin resistance protein/Dioxygenase superfamily	--	--	--
Cluster-98505.2	96.49	98.82	98.98	26.79	25.06	26.58	2307	2590	2324	606	664	593	-1.88773	7.16485e-271	1.33451e-268	down	1260	--	--	fasciclin-like arabinogalactan protein 11 [Triticum dicoccoides]	FLA11_ARATH RecName: Full=Fasciclin-like arabinogalactan protein 11; Flags: Precursor;	A0A446NK13_TRITD RecName: Full=FAS1 domain-containing protein {ECO:0000259|PROSITE:PS50213};	--	GO:0031225,anchored component of membrane; GO:0005886,plasma membrane; GO:0009834,plant-type secondary cell wall biogenesis; GO:0008150,biological_process; GO:0009832,plant-type cell wall biogenesis; GO:0009987,cellular process; GO:0042546,cell wall biogenesis; GO:0044085,cellular component biogenesis; GO:0071554,cell wall organization or biogenesis; GO:0071669,plant-type cell wall organization o…	Fasciclin domain	--	--	--
Cluster-139902.4	15.26	15.42	15.14	59.85	66.81	61.66	839	933	814	3126	4081	3182	2.06752	1.45227e-270	2.6958e-268	up	2867	K14724 solute carrier family 9 (sodium/hydrogen exchanger), member 8 | (RefSeq) sodium/hydrogen exchanger 1 isoform X1 (A)	--	sodium/hydrogen exchanger 2-like [Triticum dicoccoides]	NHX1_ORYSJ RecName: Full=Sodium/hydrogen exchanger 1 {ECO:0000303|PubMed:10395929}; AltName: Full=Na(+)/H(+) exchanger 1 {ECO:0000303|PubMed:10395929}; Short=OsNHX1 {ECO:0000303|PubMed:10395929};	A0A1D6DAW7_WHEAT RecName: Full=Sodium/hydrogen exchanger {ECO:0000256|RuleBase:RU003722};	Sodium/hydrogen exchanger protein	GO:0016021,integral component of membrane; GO:0005886,plasma membrane; GO:0005774,vacuolar membrane; GO:0015386,potassium:proton antiporter activity; GO:0015385,sodium:proton antiporter activity; GO:0071805,potassium ion transmembrane transport; GO:0051453,regulation of intracellular pH; GO:0098719,sodium ion import across plasma membrane; GO:0003674,molecular_function; GO:0005215,transporter act…	Sodium/hydrogen exchanger family	--	--	--
Cluster-98034.1	5.29	5.1	5.34	29.65	32.53	31.91	286	303	295	1620	2072	1718	2.67604	2.36471e-270	4.37471e-268	up	4047	K05681 ATP-binding cassette, subfamily G (WHITE), member 2 | (RefSeq) ABC transporter G family member 25-like (A)	ko02010: ABC transporters	unnamed protein product [Triticum turgidum subsp. durum]	AB25G_ARATH RecName: Full=ABC transporter G family member 25 {ECO:0000303|PubMed:18299247}; Short=ABC transporter ABCG.25 {ECO:0000303|PubMed:18299247}; Short=AtABCG25 {ECO:0000303|PubMed:18299247}; AltName: Full=White-brown complex homolog protein 26 {ECO:0000303|PubMed:11346655}; Short=AtWBC26 {ECO:0000303|PubMed:11346655};	A0A453HI80_AEGTS RecName: Full=ABC2_membrane domain-containing protein {ECO:0000259|Pfam:PF01061};	Transporter, ABC superfamily (Breast cancer resistance protein)	GO:0016021,integral component of membrane; GO:0016020,membrane; GO:0005886,plasma membrane; GO:0140359,ABC-type transporter activity; GO:0005524,ATP binding; GO:0042626,ATPase-coupled transmembrane transporter activity; GO:0015562,efflux transmembrane transporter activity; GO:0080168,abscisic acid transport; GO:0009738,abscisic acid-activated signaling pathway; GO:0140352,export from cell; GO:001…	ABC-2 type transporter	--	--	--
Cluster-76225.1	10.96	15.74	12.41	121.89	135.67	131.95	179	262	190	1833	2313	1911	3.33031	3.96516e-270	7.31085e-268	up	1109	K05770 translocator protein | (RefSeq) translocator protein homolog (A)	--	translocator protein homolog [Aegilops tauschii subsp. strangulata]	TSPO_ARATH RecName: Full=Translocator protein homolog; Short=AtTSPO;	A0A452Y0R1_AEGTS SubName: Full=Uncharacterized protein {ECO:0000313|EnsemblPlants:AET1Gv20247900.1};	--	GO:0031969,chloroplast membrane; GO:0005783,endoplasmic reticulum; GO:0005789,endoplasmic reticulum membrane; GO:0005794,Golgi apparatus; GO:0000139,Golgi membrane; GO:0005795,Golgi stack; GO:0016021,integral component of membrane; GO:0016020,membrane; GO:0020037,heme binding; GO:0006778,porphyrin-containing compound metabolic process; GO:0009737,response to abscisic acid; GO:0006970,response to …	TspO/MBR family	--	--	--
Cluster-82859.0	17.68	17.94	15.02	90.9	91.55	90.05	474	523	398	2314	2737	2267	2.45709	5.32047e-268	9.77681e-266	up	2068	K00573 protein-L-isoaspartate(D-aspartate) O-methyltransferase [EC:2.1.1.77] | (RefSeq) protein-L-isoaspartate O-methyltransferase (A)	--	hypothetical protein CFC21_024196 [Triticum aestivum]	PIMT_WHEAT RecName: Full=Protein-L-isoaspartate O-methyltransferase; Short=PIMT; EC=2.1.1.77; AltName: Full=L-isoaspartyl protein carboxyl methyltransferase; AltName: Full=Protein L-isoaspartyl methyltransferase; AltName: Full=Protein-beta-aspartate methyltransferase;	A0A453C7W8_AEGTS RecName: Full=Protein-L-isoaspartate O-methyltransferase {ECO:0000256|RuleBase:RU003802}; EC=2.1.1.77 {ECO:0000256|RuleBase:RU003802};	Protein-L-isoaspartate(D-aspartate) O-methyltransferase	GO:0005737,cytoplasm; GO:0004719,protein-L-isoaspartate (D-aspartate) O-methyltransferase activity; GO:0003674,molecular_function; GO:0003824,catalytic activity; GO:0008168,methyltransferase activity; GO:0008171,O-methyltransferase activity; GO:0008276,protein methyltransferase activity; GO:0008757,S-adenosylmethionine-dependent methyltransferase activity; GO:0010340,carboxyl-O-methyltransferase …	Protein-L-isoaspartate(D-aspartate) O-methyltransferase (PCMT)	--	--	--
Cluster-78640.4	65.46	67.98	64.73	141.4	146.92	147.02	2705	3138	2699	5984	7226	6017	1.23602	6.85751e-268	1.25591e-265	up	5021	--	--	unnamed protein product [Triticum turgidum subsp. durum]	MBD10_ARATH RecName: Full=Methyl-CpG-binding domain-containing protein 10; Short=AtMBD10; Short=MBD10; AltName: Full=Methyl-CpG-binding protein MBD10;	A0A446TDC2_TRITD RecName: Full=MBD domain-containing protein {ECO:0000259|PROSITE:PS50982};	--	GO:0005829,cytosol; GO:0005634,nucleus; GO:0008327,methyl-CpG binding; GO:0000166,nucleotide binding; GO:0003674,molecular_function; GO:0003676,nucleic acid binding; GO:0003677,DNA binding; GO:0005488,binding; GO:0036094,small molecule binding; GO:0043565,sequence-specific DNA binding; GO:0097159,organic cyclic compound binding; GO:1901265,nucleoside phosphate binding; GO:1901363,heterocyclic com…	--	--	--	--
Cluster-122071.5	2.21	2.68	2.39	37.34	34.2	35.89	81	108	86	1298	1396	1234	3.90591	6.96533e-268	1.2714e-265	up	2154	K10523 speckle-type POZ protein | (RefSeq) hypothetical protein (A)	--	unnamed protein product [Triticum turgidum subsp. durum]	BT2_ARATH RecName: Full=BTB/POZ and TAZ domain-containing protein 2; AltName: Full=BTB and TAZ domain protein 2;	A0A453C829_AEGTS RecName: Full=BTB domain-containing protein {ECO:0000259|PROSITE:PS50097};	CREB binding protein/P300 and related TAZ Zn-finger proteins	GO:0005737,cytoplasm; GO:0005634,nucleus; GO:0005516,calmodulin binding; GO:0046872,metal ion binding; GO:0009738,abscisic acid-activated signaling pathway; GO:0009734,auxin-activated signaling pathway; GO:0007623,circadian rhythm; GO:0009553,embryo sac development; GO:0009555,pollen development; GO:0051973,positive regulation of telomerase activity; GO:0016567,protein ubiquitination; GO:0006355,…	Predicted lipoprotein of unknown function (DUF2380)	TAZ	TR	TAZ
Cluster-72016.11	25.09	23.48	26.44	99.89	99.84	103.04	633	649	655	2385	2793	2428	2.03797	4.97455e-267	9.02008e-265	up	1313	K13496 UDP-glucosyltransferase 73C [EC:2.4.1.-] | (RefSeq) UDP-glycosyltransferase 73C5-like (A)	ko00908: Zeatin biosynthesis; ko01110: Biosynthesis of secondary metabolites	unnamed protein product [Triticum turgidum subsp. durum]	UGT1_BARVU RecName: Full=UDP-glycosyltransferase 1 {ECO:0000303|PubMed:23027665}; Short=BvUGT1 {ECO:0000303|PubMed:23027665}; EC=2.4.1.368 {ECO:0000269|PubMed:23027665}; AltName: Full=Oleanolate 3-O-glucosyltransferase UGT1 {ECO:0000305};	A0A453R729_AEGTS RecName: Full=Glycosyltransferase {ECO:0000256|RuleBase:RU362057}; EC=2.4.1.- {ECO:0000256|RuleBase:RU362057};	UDP-glucuronosyl and UDP-glucosyl transferase	GO:0035251,UDP-glucosyltransferase activity; GO:0016134,saponin metabolic process; GO:0003674,molecular_function; GO:0003824,catalytic activity; GO:0008194,UDP-glycosyltransferase activity; GO:0016740,transferase activity; GO:0016757,glycosyltransferase activity; GO:0016758,hexosyltransferase activity; GO:0046527,glucosyltransferase activity; GO:0008150,biological_process; GO:0008152,metabolic pr…	UDP-glucoronosyl and UDP-glucosyl transferase	--	--	--
Cluster-124797.1	35.7	43.17	46.01	539.99	498.49	562.3	105	134	133	1439	1550	1420	3.63684	5.22817e-267	9.44867e-265	up	418	K09338 homeobox-leucine zipper protein | (RefSeq) homeobox-leucine zipper protein ATHB-12-like (A)	--	homeobox-leucine zipper protein HOX24 [Aegilops tauschii subsp. strangulata]	HOX24_ORYSJ RecName: Full=Homeobox-leucine zipper protein HOX24; AltName: Full=HD-ZIP protein HOX24; AltName: Full=Homeodomain transcription factor HOX24; AltName: Full=OsHox24;	A0A453P6L2_AEGTS RecName: Full=Homeobox domain-containing protein {ECO:0000259|PROSITE:PS50071};	Transcription factor HEX, contains HOX and HALZ domains	GO:0005634,nucleus; GO:0000981,DNA-binding transcription factor activity, RNA polymerase II-specific; GO:0043565,sequence-specific DNA binding; GO:0045893,positive regulation of DNA-templated transcription; GO:0003674,molecular_function; GO:0003700,DNA-binding transcription factor activity; GO:0140110,transcription regulator activity; GO:0003676,nucleic acid binding; GO:0003677,DNA binding; GO:00…	Homeodomain	HB-HD-ZIP	TF	HB->HB-HD-ZIP
Cluster-95947.1	16.55	15.84	15.18	60.78	60.83	62.69	786	827	705	2750	3216	2806	1.98624	1.67956e-266	3.02541e-264	up	2285	--	--	nematode resistance protein-like HSPRO1 [Triticum aestivum]	HSPR1_ARATH RecName: Full=Nematode resistance protein-like HSPRO1; AltName: Full=AKINbetagamma-interacting protein 1; AltName: Full=Ortholog of sugar beet HS1 PRO-1 protein 1; AltName: Full=Protein Hs1pro-1;	A0A453FYB3_AEGTS SubName: Full=Uncharacterized protein {ECO:0000313|EnsemblPlants:AET3Gv20826600.1};	--	GO:0005737,cytoplasm; GO:0020037,heme binding; GO:0046872,metal ion binding; GO:0006952,defense response; GO:0019441,tryptophan catabolic process to kynurenine; GO:0003674,molecular_function; GO:0005488,binding; GO:0046906,tetrapyrrole binding; GO:0097159,organic cyclic compound binding; GO:1901363,heterocyclic compound binding; GO:0043167,ion binding; GO:0043169,cation binding; GO:0006950,respon…	Hs1pro-1 protein C-terminus	--	--	--
Cluster-124725.3	8.77	9.9	11.53	69.96	69.38	68.75	234	290	302	1771	2057	1718	2.81255	2.73169e-266	4.90451e-264	up	1373	K03522 electron transfer flavoprotein alpha subunit | (RefSeq) electron transfer flavoprotein subunit alpha, mitochondrial (A)	--	electron transfer flavoprotein subunit alpha, mitochondrial [Triticum urartu]	ETFA_ORYSI RecName: Full=Electron transfer flavoprotein subunit alpha, mitochondrial; Short=Alpha-ETF; Flags: Precursor;	A0A8I7BAE5_HORVV RecName: Full=Electron transfer flavoprotein subunit alpha {ECO:0000256|PIRNR:PIRNR000089}; Short=Alpha-ETF {ECO:0000256|PIRNR:PIRNR000089};	Electron transfer flavoprotein, alpha subunit	GO:0005759,mitochondrial matrix; GO:0009055,electron transfer activity; GO:0050660,flavin adenine dinucleotide binding; GO:0003674,molecular_function; GO:0003824,catalytic activity; GO:0016491,oxidoreductase activity; GO:0000166,nucleotide binding; GO:0005488,binding; GO:0036094,small molecule binding; GO:0043167,ion binding; GO:0043168,anion binding; GO:0097159,organic cyclic compound binding; G…	Electron transfer flavoprotein domain	--	--	--
Cluster-2791.14	96.8	86.09	89.36	389.11	383.62	411.38	1775	1727	1609	6737	7779	7011	2.13979	4.18908e-266	7.49654e-264	up	1038	--	--	Bowman-Birk type trypsin inhibitor [Triticum urartu]	IBB_HORVU RecName: Full=Bowman-Birk type trypsin inhibitor;	M7ZPA9_TRIUA SubName: Full=Bowman-Birk type trypsin inhibitor {ECO:0000313|EMBL:EMS54200.1, ECO:0000313|EnsemblPlants:TRIUR3_07182-P1};	--	GO:0005576,extracellular region; GO:0004867,serine-type endopeptidase inhibitor activity; GO:0003674,molecular_function; GO:0004857,enzyme inhibitor activity; GO:0004866,endopeptidase inhibitor activity; GO:0030234,enzyme regulator activity; GO:0030414,peptidase inhibitor activity; GO:0061134,peptidase regulator activity; GO:0061135,endopeptidase regulator activity; GO:0098772,molecular function …	Bowman-Birk serine protease inhibitor family	--	--	--
Cluster-1644.2	57.95	69.4	57.85	164.05	146.49	169.44	1754	1935	1718	4033	4645	3913	1.28519	8.04949e-266	1.4358e-263	up	2251	K17285 methanethiol oxidase [EC:1.8.3.4] | (RefSeq) selenium-binding protein 1-like (A)	ko00920: Sulfur metabolism; ko01100: Metabolic pathways	selenium-binding protein 1-like [Triticum dicoccoides]	SEBP1_ARATH RecName: Full=Selenium-binding protein 1 {ECO:0000303|PubMed:18354042}; Short=AtSBP1 {ECO:0000303|PubMed:25274629};	M7YWL9_TRIUA RecName: Full=Methanethiol oxidase {ECO:0000256|ARBA:ARBA00015601}; EC=1.8.3.4 {ECO:0000256|ARBA:ARBA00012510};	Selenium-binding protein	GO:0005829,cytosol; GO:0009506,plasmodesma; GO:0008430,selenium binding; GO:0071291,cellular response to selenium ion; GO:0046686,response to cadmium ion; GO:0042542,response to hydrogen peroxide; GO:0000103,sulfate assimilation; GO:0003674,molecular_function; GO:0005488,binding; GO:0008150,biological_process; GO:0009987,cellular process; GO:0010035,response to inorganic substance; GO:0010038,res…	56kDa selenium binding protein (SBP56)	--	--	--
Cluster-108189.0	22.43	23.26	21.3	76.45	76.96	72.86	923	1116	918	3186	3744	2993	1.81233	1.05131e-265	1.86914e-263	up	2579	--	--	hypothetical protein ZWY2020_009176 [Hordeum vulgare]	--	A0A8I6WYG8_HORVV SubName: Full=Uncharacterized protein {ECO:0000313|EnsemblPlants:HORVU.MOREX.r3.2HG0122470.2};	--	--	--	--	--	--
Cluster-117869.0	3.76	3.45	3.77	34.83	37.86	35.66	142	137	136	1224	1537	1226	3.32571	1.06056e-265	1.87949e-263	up	3637	K22683 aspartyl protease family protein [EC:3.4.23.-] | (RefSeq) aspartyl protease family protein 2 (A)	--	aspartic proteinase NANA, chloroplast [Aegilops tauschii subsp. strangulata]	NANA_ARATH RecName: Full=Aspartic proteinase NANA, chloroplast {ECO:0000303|PubMed:22987884}; EC=3.4.23.- {ECO:0000269|PubMed:22987884}; Flags: Precursor;	A0A452ZV10_AEGTS RecName: Full=Peptidase A1 domain-containing protein {ECO:0000259|PROSITE:PS51767};	Aspartyl protease	GO:0009507,chloroplast; GO:0005576,extracellular region; GO:0004190,aspartic-type endopeptidase activity; GO:0005975,carbohydrate metabolic process; GO:0010019,chloroplast-nucleus signaling pathway; GO:0007623,circadian rhythm; GO:0006508,proteolysis; GO:0009744,response to sucrose; GO:0003674,molecular_function; GO:0003824,catalytic activity; GO:0004175,endopeptidase activity; GO:0008233,peptida…	Xylanase inhibitor N-terminal	--	--	--
Cluster-117458.1	18.88	18.03	18.71	64.32	67.54	66.21	710	746	691	2298	2828	2339	1.86119	1.72424e-265	3.04579e-263	up	1809	K10260 F-box and WD-40 domain protein 7 | (RefSeq) WD40/YVTN repeat-like-containing domain (A)	ko04120: Ubiquitin mediated proteolysis	unnamed protein product [Triticum turgidum subsp. durum]	PUB21_ARATH RecName: Full=U-box domain-containing protein 21; EC=2.3.2.27; AltName: Full=Plant U-box protein 21; AltName: Full=RING-type E3 ubiquitin transferase PUB21 {ECO:0000305};	A0A453R9F0_AEGTS RecName: Full=RING-type E3 ubiquitin transferase {ECO:0000256|ARBA:ARBA00012483}; EC=2.3.2.27 {ECO:0000256|ARBA:ARBA00012483};	--	GO:0061630,ubiquitin protein ligase activity; GO:0003674,molecular_function; GO:0003824,catalytic activity; GO:0004842,ubiquitin-protein transferase activity; GO:0016740,transferase activity; GO:0019787,ubiquitin-like protein transferase activity; GO:0061659,ubiquitin-like protein ligase activity; GO:0140096,catalytic activity, acting on a protein	U-box domain	--	--	--
Cluster-127421.8	74.15	73.15	74.61	198.64	198.34	209.16	2415	2611	2387	6156	7174	6409	1.47962	2.35757e-265	4.15115e-263	up	1872	K13223 indole-2-monooxygenase [EC:1.14.14.153] | (RefSeq) indole-2-monooxygenase-like (A)	ko00402: Benzoxazinoid biosynthesis; ko00999: Biosynthesis of various plant secondary metabolites; ko01100: Metabolic pathways; ko01110: Biosynthesis of secondary metabolites	indole-2-monooxygenase-like [Hordeum vulgare subsp. vulgare]	C71C4_MAIZE RecName: Full=indole-2-monooxygenase; EC=1.14.14.153 {ECO:0000269|PubMed:9235894}; AltName: Full=Cytochrome P450 71C4; AltName: Full=Protein benzoxazineless 2;	F2DQJ9_HORVV SubName: Full=Predicted protein {ECO:0000313|EMBL:BAJ97370.1};	Cytochrome P450 CYP2 subfamily	GO:0016021,integral component of membrane; GO:0016020,membrane; GO:0020037,heme binding; GO:0036190,indole-2-monooxygenase activity; GO:0005506,iron ion binding; GO:0016709,oxidoreductase activity, acting on paired donors, with incorporation or reduction of molecular oxygen, NAD(P)H as one donor, and incorporation of one atom of oxygen; GO:0003674,molecular_function; GO:0005488,binding; GO:004690…	Cytochrome P450	--	--	--
Cluster-43365.9	11.19	9.77	9.49	159.6	150.1	184.29	177	158	142	2357	2595	2647	4.06424	2.53341e-265	4.44647e-263	up	943	--	--	uncharacterized protein LOC119301096 [Triticum dicoccoides]	--	A0A452XQK0_AEGTS SubName: Full=Uncharacterized protein {ECO:0000313|EnsemblPlants:AET1Gv20113100.1};	--	GO:0016021,integral component of membrane; GO:0005575,cellular_component; GO:0016020,membrane; GO:0031224,intrinsic component of membrane; GO:0110165,cellular anatomical entity	--	--	--	--
Cluster-424.51	18.87	18.5	20.4	61.39	64.07	58.66	1649	1781	1752	5107	6247	4837	1.70438	5.45446e-265	9.5427e-263	up	3795	K08202 MFS transporter, OCT family, solute carrier family 22 (organic cation transporter), member 4/5 | (RefSeq) organic cation/carnitine transporter 4 (A)	--	predicted protein [Hordeum vulgare subsp. vulgare]	OCT7_ARATH RecName: Full=Organic cation/carnitine transporter 7; Short=AtOCT7;	A0A453LRC8_AEGTS RecName: Full=MFS domain-containing protein {ECO:0000259|PROSITE:PS50850};	Synaptic vesicle transporter SV2 (major facilitator superfamily)	GO:0016021,integral component of membrane; GO:0005886,plasma membrane; GO:0005524,ATP binding; GO:0090417,N-methylnicotinate transmembrane transporter activity; GO:0090416,nicotinate transmembrane transporter activity; GO:2001143,N-methylnicotinate transport; GO:2001142,nicotinate transport; GO:0000166,nucleotide binding; GO:0003674,molecular_function; GO:0005488,binding; GO:0017076,purine nucleo…	Major Facilitator Superfamily	--	--	--
Cluster-139746.0	5.91	6.53	6.38	34.42	34	35.47	310	394	322	1739	2025	1790	2.50505	7.20214e-264	1.25602e-261	up	3546	--	--	uncharacterized protein LOC123160724 [Triticum aestivum]	--	A0A446YPM1_TRITD SubName: Full=Uncharacterized protein {ECO:0000313|EMBL:VAI90405.1};	--	GO:0016021,integral component of membrane; GO:0005575,cellular_component; GO:0016020,membrane; GO:0031224,intrinsic component of membrane; GO:0110165,cellular anatomical entity	Protein of unknown function (DUF3537)	--	--	--
Cluster-114027.1	460.54	467.59	437.67	157.43	153.63	159.89	11843	13187	11053	3832	4381	3792	-1.52008	7.49809e-264	1.30348e-261	down	1332	K10257 acyl-lipid omega-3 desaturase [EC:1.14.19.25 1.14.19.35 1.14.19.36] | (RefSeq) omega-3 fatty acid desaturase, chloroplastic (A)	--	plastid omega-3 fatty acid desaturase, partial [Triticum aestivum]	FAD3C_RICCO RecName: Full=Omega-3 fatty acid desaturase, chloroplastic; EC=1.14.19.-; Flags: Precursor;	O23802_WHEAT SubName: Full=Plastid omega-3 fatty acid desaturase {ECO:0000313|EMBL:BAA07785.3}; Flags: Fragment;	--	GO:0031969,chloroplast membrane; GO:0016717,oxidoreductase activity, acting on paired donors, with oxidation of a pair of donors resulting in the reduction of molecular oxygen to two molecules of water; GO:0006636,unsaturated fatty acid biosynthetic process; GO:0003674,molecular_function; GO:0003824,catalytic activity; GO:0016491,oxidoreductase activity; GO:0016705,oxidoreductase activity, acting…	Fatty acid desaturase	--	--	--
Cluster-121954.2	11.25	9.9	8.24	102.5	105.83	108.08	189	182	136	1625	1965	1685	3.44418	6.87199e-263	1.19086e-260	up	977	--	--	defensin-like protein 1 [Hordeum vulgare subsp. vulgare]	DEF1_HORVU RecName: Full=Defensin-like protein 1; AltName: Full=Gamma-hordothionin;	W5FHQ6_WHEAT SubName: Full=Defensin {ECO:0000313|EMBL:AIA67016.1, ECO:0000313|EnsemblPlants:TraesCS5B02G329100.1};	--	GO:0050832,defense response to fungus; GO:0031640,killing of cells of another organism; GO:0006950,response to stress; GO:0006952,defense response; GO:0008150,biological_process; GO:0009605,response to external stimulus; GO:0009607,response to biotic stimulus; GO:0009620,response to fungus; GO:0043207,response to external biotic stimulus; GO:0044419,biological process involved in interspecies int…	Gamma-thionin family	--	--	--
Cluster-35007.4	38.3	36.77	39.81	153.25	160.83	161.79	568	601	594	2162	2669	2253	2.06994	3.96869e-262	6.8557e-260	up	957	--	--	uncharacterized protein LOC109768196 [Aegilops tauschii subsp. strangulata]	--	A0A1D6C3U0_WHEAT SubName: Full=Uncharacterized protein {ECO:0000313|EnsemblPlants:TraesCS7B02G207600.1};	--	--	--	--	--	--
Cluster-104429.7	32.03	35.34	36.35	99.14	97	95.9	2062	2504	2298	6068	6958	5815	1.52349	2.08522e-261	3.59077e-259	up	2875	K10527 enoyl-CoA hydratase/3-hydroxyacyl-CoA dehydrogenase [EC:4.2.1.17 1.1.1.35 1.1.1.211] | (RefSeq) peroxisomal fatty acid beta-oxidation multifunctional protein-like (A)	ko00071: Fatty acid degradation; ko00592: alpha-Linolenic acid metabolism; ko01100: Metabolic pathways; ko01110: Biosynthesis of secondary metabolites; ko01212: Fatty acid metabolism	peroxisomal fatty acid beta-oxidation multifunctional protein-like [Triticum aestivum]	MFP_ORYSJ RecName: Full=Peroxisomal fatty acid beta-oxidation multifunctional protein; Short=MFP; Includes: RecName: Full=Enoyl-CoA hydratase/3-2-trans-enoyl-CoA isomerase/3-hydroxybutyryl-CoA epimerase; EC=4.2.1.17; EC=5.1.2.3; EC=5.3.3.8; Includes: RecName: Full=3-hydroxyacyl-CoA dehydrogenase; EC=1.1.1.35;	A0A3B6PIU6_WHEAT SubName: Full=Uncharacterized protein {ECO:0000313|EnsemblPlants:TraesCS6B02G153900.1};	Hydroxyacyl-CoA dehydrogenase/enoyl-CoA hydratase	GO:0005874,microtubule; GO:0005777,peroxisome; GO:0018812,3-hydroxyacyl-CoA dehydratase activity; GO:0003857,3-hydroxyacyl-CoA dehydrogenase activity; GO:0008692,3-hydroxybutyryl-CoA epimerase activity; GO:0004165,delta(3)-delta(2)-enoyl-CoA isomerase activity; GO:0004300,enoyl-CoA hydratase activity; GO:0008017,microtubule binding; GO:0003729,mRNA binding; GO:0070403,NAD+ binding; GO:0006635,fat…	3-hydroxyacyl-CoA dehydrogenase, NAD binding domain	--	--	--
Cluster-122132.2	87.74	89.95	95.9	238.39	199.17	206.45	4636	5229	4976	10255	11716	9939	1.17019	9.83395e-261	1.68811e-258	up	2414	K01255 leucyl aminopeptidase [EC:3.4.11.1] | (RefSeq) leucine aminopeptidase 2, chloroplastic-like (A)	ko00480: Glutathione metabolism; ko01100: Metabolic pathways	hypothetical protein CFC21_084989 [Triticum aestivum]	AMPL2_ORYSJ RecName: Full=Leucine aminopeptidase 2, chloroplastic; EC=3.4.11.1; AltName: Full=Leucyl aminopeptidase 2; Short=LAP 2; AltName: Full=Proline aminopeptidase 2; EC=3.4.11.5; AltName: Full=Prolyl aminopeptidase 2; Flags: Precursor;	A0A446VS33_TRITD RecName: Full=CYTOSOL_AP domain-containing protein {ECO:0000259|PROSITE:PS00631};	Predicted aminopeptidase of the M17 family	GO:0009507,chloroplast; GO:0005737,cytoplasm; GO:0030145,manganese ion binding; GO:0070006,metalloaminopeptidase activity; GO:0008233,peptidase activity; GO:0006508,proteolysis; GO:0003674,molecular_function; GO:0005488,binding; GO:0043167,ion binding; GO:0043169,cation binding; GO:0046872,metal ion binding; GO:0046914,transition metal ion binding; GO:0003824,catalytic activity; GO:0004177,aminop…	Cytosol aminopeptidase family, catalytic domain	--	--	--
Cluster-43929.0	56.68	61.24	63.54	156.26	156.15	159.67	1539	1822	1660	3957	4680	3951	1.39191	1.20717e-259	2.06577e-257	up	1413	K24140 glutaredoxin-dependent peroxiredoxin [EC:1.11.1.25] | (RefSeq) peroxiredoxin-2B (A)	--	peroxiredoxin-2E-1, chloroplastic [Aegilops tauschii subsp. strangulata]	PR2E1_ORYSJ RecName: Full=Peroxiredoxin-2E-1, chloroplastic; EC=1.11.1.25 {ECO:0000250|UniProtKB:A9PCL4}; AltName: Full=Glutaredoxin-dependent peroxiredoxin {ECO:0000305}; AltName: Full=Peroxiredoxin IIE-1; AltName: Full=Thioredoxin peroxidase 2E-1; Flags: Precursor;	A0A453SJH9_AEGTS RecName: Full=Glutaredoxin-dependent peroxiredoxin {ECO:0000256|ARBA:ARBA00013016, ECO:0000256|RuleBase:RU366011}; EC=1.11.1.25 {ECO:0000256|ARBA:ARBA00013016, ECO:0000256|RuleBase:RU366011};	Alkyl hydroperoxide reductase/peroxiredoxin	GO:0009570,chloroplast stroma; GO:0005737,cytoplasm; GO:0008379,thioredoxin peroxidase activity; GO:0045454,cell redox homeostasis; GO:0034599,cellular response to oxidative stress; GO:0042744,hydrogen peroxide catabolic process; GO:0003674,molecular_function; GO:0003824,catalytic activity; GO:0004601,peroxidase activity; GO:0016209,antioxidant activity; GO:0016491,oxidoreductase activity; GO:001…	Redoxin	--	--	--
Cluster-135436.8	218.53	215.48	215.25	90.89	88.78	86.15	6773	7331	6550	2669	3056	2500	-1.26364	2.67489e-259	4.56314e-257	down	1609	K01759 lactoylglutathione lyase [EC:4.4.1.5] | (RefSeq) lactoylglutathione lyase GLX1-like (A)	ko00620: Pyruvate metabolism; ko01100: Metabolic pathways	unnamed protein product [Triticum turgidum subsp. durum]	LGUC_ARATH RecName: Full=Probable lactoylglutathione lyase, chloroplastic; EC=4.4.1.5; AltName: Full=Glyoxalase I; Flags: Precursor;	A0A446USE1_TRITD RecName: Full=Lactoylglutathione lyase {ECO:0000256|ARBA:ARBA00012081}; EC=4.4.1.5 {ECO:0000256|ARBA:ARBA00012081};	Predicted glyoxalase	GO:0009507,chloroplast; GO:0009570,chloroplast stroma; GO:0005737,cytoplasm; GO:0005739,mitochondrion; GO:0010319,stromule; GO:0009579,thylakoid; GO:0031977,thylakoid lumen; GO:0004462,lactoylglutathione lyase activity; GO:0046872,metal ion binding; GO:0019243,methylglyoxal catabolic process to D-lactate via S-lactoyl-glutathione; GO:0009409,response to cold; GO:0003674,molecular_function; GO:000…	Glyoxalase/Bleomycin resistance protein/Dioxygenase superfamily	--	--	--
Cluster-110951.0	23.73	26.09	26.1	85.82	85.67	82.68	695	831	745	2354	2791	2253	1.76866	2.50018e-258	4.25186e-256	up	1573	K12133 MYB-related transcription factor LHY | (RefSeq) protein LHY (A)	ko04712: Circadian rhythm - plant	protein REVEILLE 7 [Aegilops tauschii subsp. strangulata]	RVE7_ARATH RecName: Full=Protein REVEILLE 7; AltName: Full=Early-phytochrome-responsive 1; AltName: Full=MYB-related transcription factor EPR1;	W5BST9_WHEAT SubName: Full=Genome assembly, chromosome: II {ECO:0000313|EMBL:SPT19937.1};	Zuotin and related molecular chaperones (DnaJ superfamily), contains DNA-binding domains	GO:0005634,nucleus; GO:0003677,DNA binding; GO:0003700,DNA-binding transcription factor activity; GO:0007623,circadian rhythm; GO:0006355,regulation of DNA-templated transcription; GO:0003674,molecular_function; GO:0003676,nucleic acid binding; GO:0005488,binding; GO:0097159,organic cyclic compound binding; GO:1901363,heterocyclic compound binding; GO:0140110,transcription regulator activity; GO:…	Cobalamin adenosyltransferase	MYB-related	TF	MYB->MYB-related
Cluster-127258.1	119.88	114.93	119.17	283.23	297.49	291.71	3089	3254	3017	6918	8520	7024	1.3256	2.66595e-258	4.51973e-256	up	2407	K00432 glutathione peroxidase [EC:1.11.1.9] | (RefSeq) probable phospholipid hydroperoxide glutathione peroxidase (A)	ko00480: Glutathione metabolism; ko01100: Metabolic pathways	unnamed protein product [Triticum turgidum subsp. durum]	GPX6_ARATH RecName: Full=Probable phospholipid hydroperoxide glutathione peroxidase 6, mitochondrial; Short=AtGPX1; Short=PHGPx; EC=1.11.1.12; Flags: Precursor;	A0A453P886_AEGTS RecName: Full=Glutathione peroxidase {ECO:0000256|RuleBase:RU000499};	Glutathione peroxidase	GO:0009507,chloroplast; GO:0005829,cytosol; GO:0005739,mitochondrion; GO:0005886,plasma membrane; GO:0004602,glutathione peroxidase activity; GO:0004601,peroxidase activity; GO:0047066,phospholipid-hydroperoxide glutathione peroxidase activity; GO:0006979,response to oxidative stress; GO:0003674,molecular_function; GO:0003824,catalytic activity; GO:0016209,antioxidant activity; GO:0016491,oxidore…	Glutathione peroxidase	--	--	--
Cluster-113474.10	20.37	20.77	21.55	71.02	67.35	64.73	1093	1227	1136	3623	4014	3269	1.72345	2.78264e-258	4.703e-256	up	2448	K13863 solute carrier family 7 (cationic amino acid transporter), member 1 | (RefSeq) cationic amino acid transporter 2, vacuolar-like (A)	--	High affinity cationic amino acid transporter 1 [Hordeum vulgare]	CAAT2_ARATH RecName: Full=Cationic amino acid transporter 2, vacuolar;	F2DF37_HORVV SubName: Full=Predicted protein {ECO:0000313|EMBL:BAJ93708.1};	Amino acid transporters	GO:0016021,integral component of membrane; GO:0000325,plant-type vacuole; GO:0009705,plant-type vacuole membrane; GO:0015171,amino acid transmembrane transporter activity; GO:0080144,amino acid homeostasis; GO:0006865,amino acid transport; GO:0003674,molecular_function; GO:0005215,transporter activity; GO:0005342,organic acid transmembrane transporter activity; GO:0022857,transmembrane transporte…	Amino acid permease	--	--	--
Cluster-89136.2	39.34	31.95	39.52	242.79	253.19	246.41	547	484	539	3176	3879	3164	2.76109	1.70766e-257	2.87728e-255	up	861	K00521 ferric-chelate reductase [EC:1.16.1.7] | (RefSeq) ferric reduction oxidase 7, chloroplastic-like (A)	--	NAC domain-containing protein 48-like [Hordeum vulgare subsp. vulgare]	NAC48_ORYSJ RecName: Full=NAC domain-containing protein 48 {ECO:0000303|PubMed:15029955}; Short=ONAC048 {ECO:0000303|PubMed:15029955}; AltName: Full=OsNAC6 {ECO:0000303|PubMed:10660065}; AltName: Full=Protein STRESS-RESPONSIVE NAC 2 {ECO:0000303|PubMed:18273684};	A0A8I7BAS5_HORVV RecName: Full=NAC domain-containing protein {ECO:0000259|PROSITE:PS51005};	--	GO:0005634,nucleus; GO:0043565,sequence-specific DNA binding; GO:1901002,positive regulation of response to salt stress; GO:1902584,positive regulation of response to water deprivation; GO:0045893,positive regulation of DNA-templated transcription; GO:1900150,regulation of defense response to fungus; GO:0040008,regulation of growth; GO:0009409,response to cold; GO:0048364,root development; GO:000…	No apical meristem (NAM) protein	NAC	TF	NAC
Cluster-109775.4	164.2	174.75	178.02	698.55	645.29	719.54	945	1095	1035	3755	4057	3702	1.9742	5.73757e-256	9.63771e-254	up	657	--	--	unnamed protein product [Triticum turgidum subsp. durum]	--	A0A446MCY6_TRITD SubName: Full=Uncharacterized protein {ECO:0000313|EMBL:VAH47766.1};	--	--	ABA/WDS induced protein	--	--	--
Cluster-121850.3	304.39	327.34	318.5	129.14	135.91	128.97	12154	14366	12489	4893	6034	4833	-1.24289	1.85235e-255	3.10198e-253	down	1899	K17525 chitinase domain-containing protein 1 | (RefSeq) rhodanese-like domain-containing protein 4, chloroplastic (A)	--	protein THYLAKOID RHODANESE-LIKE, chloroplastic [Hordeum vulgare subsp. vulgare]	TROL_ORYSI RecName: Full=Protein THYLAKOID RHODANESE-LIKE, chloroplastic {ECO:0000305}; Flags: Precursor;	A0A446P0I4_TRITD RecName: Full=Rhodanese domain-containing protein {ECO:0000259|PROSITE:PS50206};	--	GO:0098807,chloroplast thylakoid membrane protein complex; GO:0016021,integral component of membrane; GO:0005575,cellular_component; GO:0005622,intracellular anatomical structure; GO:0005737,cytoplasm; GO:0009507,chloroplast; GO:0009526,plastid envelope; GO:0009534,chloroplast thylakoid; GO:0009535,chloroplast thylakoid membrane; GO:0009536,plastid; GO:0009579,thylakoid; GO:0016020,membrane; GO:0…	--	--	--	--
Cluster-124484.4	452.05	474.03	447.45	1002.18	1039.8	1020.29	9675	11112	9405	20274	24640	20343	1.17737	4.71158e-255	7.86604e-253	up	1160	--	--	chitinase 1 [Aegilops tauschii subsp. strangulata]	CHIT1_TULSB RecName: Full=Chitinase 1; EC=3.2.1.14; AltName: Full=Tulip bulb chitinase-1; Short=TBC-1; Flags: Precursor;	A0A452Z9J0_AEGTS RecName: Full=GH18 domain-containing protein {ECO:0000259|PROSITE:PS51910};	--	GO:0008061,chitin binding; GO:0004568,chitinase activity; GO:0006032,chitin catabolic process; GO:0000272,polysaccharide catabolic process; GO:0003674,molecular_function; GO:0005488,binding; GO:0097367,carbohydrate derivative binding; GO:0003824,catalytic activity; GO:0004553,hydrolase activity, hydrolyzing O-glycosyl compounds; GO:0016787,hydrolase activity; GO:0016798,hydrolase activity, acting…	Glycosyl hydrolases family 18	--	--	--
Cluster-120010.0	27.47	26.17	25.64	69.6	73.02	66.97	1215	1283	1166	3074	3659	3041	1.47973	1.33288e-253	2.21849e-251	up	3689	K14494 DELLA protein | (RefSeq) DELLA protein GAIP-B (A)	ko04075: Plant hormone signal transduction	scarecrow-like protein 1 [Aegilops tauschii subsp. strangulata]	SCL1_ARATH RecName: Full=Scarecrow-like protein 1; Short=AtSCL1; AltName: Full=GRAS family protein 4; Short=AtGRAS-4;	M8C1W0_AEGTA SubName: Full=Uncharacterized protein {ECO:0000313|EMBL:EMT31245.1, ECO:0000313|EnsemblPlants:EMT31245};	--	GO:0005634,nucleus; GO:0003700,DNA-binding transcription factor activity; GO:0043565,sequence-specific DNA binding; GO:0000976,transcription cis-regulatory region binding; GO:0006355,regulation of DNA-templated transcription; GO:0003674,molecular_function; GO:0140110,transcription regulator activity; GO:0003676,nucleic acid binding; GO:0003677,DNA binding; GO:0005488,binding; GO:0097159,organic c…	GRAS domain family	GRAS	TF	GRAS
Cluster-128923.0	7.17	6.09	7.17	61.13	61.11	65.2	161	151	155	1273	1507	1337	3.20511	1.81722e-253	3.01548e-251	up	2008	--	--	hypothetical protein CFC21_048005, partial [Triticum aestivum]	--	A0A453FGW9_AEGTS SubName: Full=Uncharacterized protein {ECO:0000313|EnsemblPlants:AET3Gv20674500.1};	--	--	Nitrogen regulatory protein AreA N terminus	--	--	--
Cluster-127458.11	36.05	40.06	40.23	122.71	119.75	118.49	964	1176	1057	3110	3555	2964	1.6573	5.93935e-253	9.82595e-251	up	1374	K01456 peptide-N4-(N-acetyl-beta-glucosaminyl)asparagine amidase [EC:3.5.1.52] | (RefSeq) peptide-N(4)-(N-acetyl-beta- glucosaminyl)asparagine amidase-like (A)	ko04141: Protein processing in endoplasmic reticulum	probable aldo-keto reductase 2 [Aegilops tauschii subsp. strangulata]	AKR2_ORYSJ RecName: Full=Probable aldo-keto reductase 2; EC=1.1.1.-;	A0A453MF05_AEGTS RecName: Full=Aldo_ket_red domain-containing protein {ECO:0000259|Pfam:PF00248};	Voltage-gated shaker-like K+ channel, subunit beta/KCNAB	GO:0005737,cytoplasm; GO:0004033,aldo-keto reductase (NADP) activity; GO:0003674,molecular_function; GO:0003824,catalytic activity; GO:0016491,oxidoreductase activity; GO:0016614,oxidoreductase activity, acting on CH-OH group of donors; GO:0016616,oxidoreductase activity, acting on the CH-OH group of donors, NAD or NADP as acceptor; GO:0005575,cellular_component; GO:0005622,intracellular anatomic…	Aldo/keto reductase family	--	--	--
Cluster-4711.15	5.26	4.46	5.12	82.02	78.72	79.62	74	69	71	1099	1234	1047	4.04681	1.19315e-252	1.96797e-250	up	877	--	--	hypothetical protein CFC21_016691 [Triticum aestivum]	--	A0A3B6KTB3_WHEAT RecName: Full=GRAM domain-containing protein {ECO:0000259|SMART:SM00568};	--	--	--	--	--	--
Cluster-77633.2	51.52	53.84	49.26	144.99	143	142.78	2325	2674	2185	6218	7186	6052	1.50461	2.14367e-252	3.52514e-250	up	2112	K03457 nucleobase:cation symporter-1, NCS1 family | (RefSeq) purine-uracil permease NCS1-like (A)	--	hypothetical protein CFC21_103144 [Triticum aestivum]	NCS1_ARATH RecName: Full=Purine-uracil permease NCS1 {ECO:0000305}; AltName: Full=Nucleobase cation symporter 1 {ECO:0000303|PubMed:22616996}; Short=AtNCS1 {ECO:0000303|PubMed:22616996}; AltName: Full=Plastidic nucleobase transporter {ECO:0000303|PubMed:22474184}; AltName: Full=Uracil/purine transport protein NCS1 {ECO:0000305};	A0A8I6YHB9_HORVV SubName: Full=Uncharacterized protein {ECO:0000313|EnsemblPlants:HORVU.MOREX.r3.7HG0702510.1};	Uridine permease/thiamine transporter/allantoin transport	GO:0031969,chloroplast membrane; GO:0016021,integral component of membrane; GO:0005886,plasma membrane; GO:0009526,plastid envelope; GO:0015205,nucleobase transmembrane transporter activity; GO:0015851,nucleobase transport; GO:0043100,pyrimidine nucleobase salvage; GO:0003674,molecular_function; GO:0005215,transporter activity; GO:0022857,transmembrane transporter activity; GO:0006810,transport; …	Permease for cytosine/purines, uracil, thiamine, allantoin	--	--	--
Cluster-122292.0	10.89	11.57	7.3	170.71	158.07	169.09	149	173	101	2178	2380	2136	4.05638	2.44906e-252	4.01528e-250	up	994	--	--	late embryogenesis abundant protein 19-like [Triticum aestivum]	LEA1_HORVU RecName: Full=ABA-inducible protein PHV A1;	A0A3B5ZVX4_WHEAT SubName: Full=Uncharacterized protein {ECO:0000313|EnsemblPlants:TraesCS1D02G242300.1};	--	--	Late embryogenesis abundant protein	--	--	--
Cluster-127964.0	25.89	26.21	28.51	80.73	78.03	81.39	1255	1419	1356	3664	4227	3730	1.59454	4.75576e-252	7.77389e-250	up	5726	K10357 myosin V | (RefSeq) myosin-17-like (A)	ko04814: Motor proteins	hypothetical protein ZWY2020_044678 [Hordeum vulgare]	P2C50_ORYSJ RecName: Full=Protein phosphatase 2C 50 {ECO:0000305}; Short=OsPP2C50 {ECO:0000303|PubMed:19021904}; EC=3.1.3.16 {ECO:0000269|PubMed:28827170}; AltName: Full=ABI1-like protein 3 {ECO:0000305}; Short=OsABI-LIKE3 {ECO:0000303|PubMed:26491145}; Short=OsABIL3 {ECO:0000303|PubMed:26491145};	A0A8I6X6B7_HORVV SubName: Full=Uncharacterized protein {ECO:0000313|EnsemblPlants:HORVU.MOREX.r3.1HG0080900.1};	Myosin class V heavy chain	GO:0005634,nucleus; GO:0046872,metal ion binding; GO:0017018,myosin phosphatase activity; GO:0004722,protein serine/threonine phosphatase activity; GO:0009738,abscisic acid-activated signaling pathway; GO:0035970,peptidyl-threonine dephosphorylation; GO:0003674,molecular_function; GO:0005488,binding; GO:0043167,ion binding; GO:0043169,cation binding; GO:0003824,catalytic activity; GO:0004721,phos…	Protein phosphatase 2C	--	--	--
Cluster-73373.0	11.69	12.54	11.76	54.24	57.2	58.45	392	460	381	1753	2181	1845	2.2941	1.46226e-251	2.38314e-249	up	1734	K13082 bifunctional dihydroflavonol 4-reductase/flavanone 4-reductase [EC:1.1.1.219 1.1.1.234] | (RefSeq) dihydroflavonol 4-reductase (A)	ko00941: Flavonoid biosynthesis; ko01100: Metabolic pathways; ko01110: Biosynthesis of secondary metabolites	dihydroflavonol 4-reductase [Aegilops tauschii subsp. strangulata]	DFRA_HORVU RecName: Full=Dihydroflavonol 4-reductase; Short=DFR; EC=1.1.1.219 {ECO:0000250|UniProtKB:Q9XES5}; AltName: Full=Dihydrokaempferol 4-reductase; AltName: Full=Flavanone 4-reductase; Short=FNR; EC=1.1.1.234 {ECO:0000250|UniProtKB:Q9XES5};	A0A453F3M8_AEGTS RecName: Full=Epimerase domain-containing protein {ECO:0000259|Pfam:PF01370};	Flavonol reductase/cinnamoyl-CoA reductase	GO:0045552,dihydrokaempferol 4-reductase activity; GO:0047890,flavanone 4-reductase activity; GO:0009718,anthocyanin-containing compound biosynthetic process; GO:0003674,molecular_function; GO:0003824,catalytic activity; GO:0016491,oxidoreductase activity; GO:0016614,oxidoreductase activity, acting on CH-OH group of donors; GO:0016616,oxidoreductase activity, acting on the CH-OH group of donors, …	NAD dependent epimerase/dehydratase family	--	--	--
Cluster-81578.14	829.25	819.15	801.72	217.58	231.87	236.66	3033	3180	2880	725	903	753	-1.86991	3.02176e-251	4.91014e-249	down	449	K14504 xyloglucan:xyloglucosyl transferase TCH4 [EC:2.4.1.207] | (RefSeq) xyloglucan endotransglucosylase/hydrolase protein 22-like (A)	ko04075: Plant hormone signal transduction	xyloglucan endotransglucosylase protein 7-like [Triticum urartu]	XTH22_ARATH RecName: Full=Xyloglucan endotransglucosylase/hydrolase protein 22; Short=At-XTH22; Short=XTH-22; EC=2.4.1.207; AltName: Full=Touch protein 4; Flags: Precursor;	M7ZBG5_TRIUA RecName: Full=Xyloglucan endotransglucosylase/hydrolase {ECO:0000256|RuleBase:RU361120}; EC=2.4.1.207 {ECO:0000256|RuleBase:RU361120};	--	GO:0048046,apoplast; GO:0005794,Golgi apparatus; GO:0099503,secretory vesicle; GO:0004553,hydrolase activity, hydrolyzing O-glycosyl compounds; GO:0030247,polysaccharide binding; GO:0016762,xyloglucan:xyloglucosyl transferase activity; GO:0042546,cell wall biogenesis; GO:0071456,cellular response to hypoxia; GO:0009664,plant-type cell wall organization; GO:0009733,response to auxin; GO:0009741,re…	Glycosyl hydrolases family 16	--	--	--
Cluster-78338.2	194.22	192.54	211.15	612.16	626.22	609.4	1251	1336	1336	3654	4366	3522	1.61934	3.91033e-251	6.3352e-249	up	563	K25108 licheninase [EC:3.2.1.73] | (RefSeq) lichenase-2 (A)	--	(1,3;1,4) beta-glucanase, partial [Triticum aestivum]	GUB2_HORVU RecName: Full=Lichenase-2; EC=3.2.1.73; AltName: Full=(1->3,1->4)-beta-glucanase isoenzyme EII; AltName: Full=Endo-beta-1,3-1,4 glucanase II; AltName: Full=Lichenase II; Flags: Precursor; Fragment;	Q2V6H6_WHEAT SubName: Full=(1,3;1,4) beta-glucanase {ECO:0000313|EMBL:ABB96917.1}; Flags: Fragment;	--	GO:0042972,licheninase activity; GO:0005975,carbohydrate metabolic process; GO:0003674,molecular_function; GO:0003824,catalytic activity; GO:0004553,hydrolase activity, hydrolyzing O-glycosyl compounds; GO:0016787,hydrolase activity; GO:0016798,hydrolase activity, acting on glycosyl bonds; GO:0008150,biological_process; GO:0008152,metabolic process; GO:0044238,primary metabolic process; GO:007170…	Glycosyl hydrolases family 17	--	--	--
Cluster-139261.1	6.22	6.01	7.86	56.23	57.63	52.55	241	257	300	2075	2492	1918	3.08253	2.98832e-250	4.82715e-248	up	1858	K00819 ornithine--oxo-acid transaminase [EC:2.6.1.13] | (RefSeq) ornithine aminotransferase, mitochondrial (A)	ko00330: Arginine and proline metabolism; ko01100: Metabolic pathways; ko01110: Biosynthesis of secondary metabolites	ornithine aminotransferase, mitochondrial [Aegilops tauschii subsp. strangulata]	OAT_ORYSJ RecName: Full=Ornithine aminotransferase, mitochondrial; EC=2.6.1.13; AltName: Full=Ornithine delta-aminotransferase; AltName: Full=Ornithine--oxo-acid aminotransferase; Flags: Precursor;	A0A3B6MXE9_WHEAT RecName: Full=Ornithine aminotransferase {ECO:0000256|ARBA:ARBA00012924, ECO:0000256|RuleBase:RU365036}; EC=2.6.1.13 {ECO:0000256|ARBA:ARBA00012924, ECO:0000256|RuleBase:RU365036};	Ornithine aminotransferase	GO:0005737,cytoplasm; GO:0005759,mitochondrial matrix; GO:0042802,identical protein binding; GO:0050155,ornithine(lysine) transaminase activity; GO:0004587,ornithine-oxo-acid transaminase activity; GO:0030170,pyridoxal phosphate binding; GO:0019544,arginine catabolic process to glutamate; GO:0010121,arginine catabolic process to proline via ornithine; GO:0042742,defense response to bacterium; GO:…	Aminotransferase class-III	--	--	--
Cluster-19072.0	10.45	11.86	14.46	110.51	102.21	103.34	474	605	645	4936	5285	4485	3.16035	1.74164e-249	2.80506e-247	up	2403	K03696 ATP-dependent Clp protease ATP-binding subunit ClpC | (RefSeq) chaperone protein ClpD1, chloroplastic-like (A)	--	hypothetical protein CFC21_066975 [Triticum aestivum]	CLPD1_ORYSJ RecName: Full=Chaperone protein ClpD1, chloroplastic {ECO:0000305}; AltName: Full=ATP-dependent Clp protease ATP-binding subunit ClpD homolog 1 {ECO:0000305}; AltName: Full=Casein lytic proteinase D1 {ECO:0000303|PubMed:27457985}; Flags: Precursor;	A0A3B6KN04_WHEAT RecName: Full=Clp R domain-containing protein {ECO:0000259|PROSITE:PS51903};	Chaperone HSP104 and related ATP-dependent Clp proteases	GO:0009507,chloroplast; GO:0005524,ATP binding; GO:0016887,ATP hydrolysis activity; GO:0034605,cellular response to heat; GO:1901002,positive regulation of response to salt stress; GO:1902584,positive regulation of response to water deprivation; GO:0000166,nucleotide binding; GO:0003674,molecular_function; GO:0005488,binding; GO:0017076,purine nucleotide binding; GO:0030554,adenyl nucleotide bind…	AAA lid domain	--	--	--
Cluster-457.4	9.1	9.91	8.67	67.64	69.71	72.07	189	225	173	1326	1601	1397	2.94803	2.93465e-249	4.71266e-247	up	1154	--	--	hypothetical protein CFC21_107069 [Triticum aestivum]	--	A0A3B6TD24_WHEAT SubName: Full=Uncharacterized protein {ECO:0000313|EnsemblPlants:TraesCS7D02G070400.1};	FOG: PPR repeat	--	SAPK-interacting protein 1 (Sin1), middle CRIM domain	--	--	--
Cluster-126172.0	13.19	14.54	11.86	82.4	77.71	81.27	653	791	569	3872	4275	3779	2.63849	1.73238e-248	2.77383e-246	up	2473	K25900 cysteine proteinase RD21 [EC:3.4.22.-] | (RefSeq) low-temperature-induced cysteine proteinase (A)	--	hypothetical protein CFC21_003335 [Triticum aestivum]	RD21B_ARATH RecName: Full=Probable cysteine protease RD21B {ECO:0000305}; EC=3.4.22.- {ECO:0000305}; Flags: Precursor;	A0A452ZHI8_AEGTS SubName: Full=Uncharacterized protein {ECO:0000313|EnsemblPlants:AET1Gv20787700.7};	Cysteine proteinase Cathepsin L	GO:0005783,endoplasmic reticulum; GO:0005615,extracellular space; GO:0005764,lysosome; GO:0099503,secretory vesicle; GO:0005773,vacuole; GO:0004197,cysteine-type endopeptidase activity; GO:0051603,proteolysis involved in protein catabolic process; GO:0003674,molecular_function; GO:0003824,catalytic activity; GO:0004175,endopeptidase activity; GO:0008233,peptidase activity; GO:0008234,cysteine-typ…	Papain family cysteine protease	--	--	--
Cluster-50620.0	51.3	52.81	51.42	195.37	185.35	200.08	707	794	696	2533	2814	2546	1.91364	2.36357e-248	3.77344e-246	up	856	--	--	uncharacterized protein LOC119347698 [Triticum dicoccoides]	--	A0A446K3Q3_TRITD SubName: Full=Uncharacterized protein {ECO:0000313|EMBL:VAH19982.1};	--	--	--	--	--	--
Cluster-97621.3	5.34	6.13	5.93	38.76	41.34	41.16	189	239	206	1307	1633	1372	2.83111	7.62642e-248	1.21402e-245	up	1737	--	--	probable F-box protein At2g36090 [Hordeum vulgare subsp. vulgare]	FB322_ARATH RecName: Full=Probable F-box protein At2g36090;	F2DXT6_HORVV SubName: Full=Predicted protein {ECO:0000313|EMBL:BAJ99907.1};	--	--	F-box-like	--	--	--
Cluster-91358.0	24.97	26.31	24.25	98.22	104.12	108.18	913	1061	879	3413	4254	3734	2.06547	1.28468e-247	2.0391e-245	up	2945	K13464 jasmonate ZIM domain-containing protein | (RefSeq) protein TIFY 11b-like (A)	ko04075: Plant hormone signal transduction	protein TIFY 11b-like [Triticum aestivum]	TI11B_ORYSJ RecName: Full=Protein TIFY 11b {ECO:0000305}; Short=OsTIFY11b {ECO:0000303|PubMed:19618278}; AltName: Full=Jasmonate ZIM domain-containing protein 10 {ECO:0000305}; Short=OsJAZ10 {ECO:0000303|PubMed:19618278}; AltName: Full=OsJAZ4 {ECO:0000303|PubMed:23320078};	A0A3B6JLX8_WHEAT RecName: Full=Tify domain-containing protein {ECO:0000259|PROSITE:PS51320};	--	GO:0005634,nucleus; GO:0031347,regulation of defense response; GO:2000022,regulation of jasmonic acid mediated signaling pathway; GO:0009611,response to wounding; GO:0006950,response to stress; GO:0006952,defense response; GO:0008150,biological_process; GO:0048583,regulation of response to stimulus; GO:0050789,regulation of biological process; GO:0050896,response to stimulus; GO:0065007,biologica…	tify domain	Tify	TF	Tify
Cluster-22352.44	790.26	781.12	824.75	281.66	273.79	295.62	6021	6431	6171	1996	2271	2037	-1.49693	1.28885e-247	2.03981e-245	down	641	K08912 light-harvesting complex II chlorophyll a/b binding protein 1 | (RefSeq) chlorophyll a-b binding protein of LHCII type 1-like (A)	ko00196: Photosynthesis - antenna proteins; ko01100: Metabolic pathways	unnamed protein product [Triticum turgidum subsp. durum]	CB22_MAIZE RecName: Full=Chlorophyll a-b binding protein, chloroplastic; AltName: Full=LHCII type I CAB; Short=LHCP; Flags: Precursor;	A0A446J6B2_TRITD RecName: Full=Chlorophyll a-b binding protein, chloroplastic {ECO:0000256|RuleBase:RU363080};	--	GO:0009535,chloroplast thylakoid membrane; GO:0016021,integral component of membrane; GO:0009522,photosystem I; GO:0009523,photosystem II; GO:0016168,chlorophyll binding; GO:0046872,metal ion binding; GO:0009768,photosynthesis, light harvesting in photosystem I; GO:0009416,response to light stimulus; GO:0003674,molecular_function; GO:0005488,binding; GO:0046906,tetrapyrrole binding; GO:0097159,or…	Chlorophyll A-B binding protein	--	--	--
Cluster-130034.3	21.56	23.32	25.1	75.95	76.49	72.14	1495	1781	1709	5010	5913	4715	1.71338	4.12166e-246	6.48569e-244	up	3074	K14497 protein phosphatase 2C [EC:3.1.3.16] | (RefSeq) probable protein phosphatase 2C 6 (A)	ko04016: MAPK signaling pathway - plant; ko04075: Plant hormone signal transduction	probable protein phosphatase 2C 6 [Triticum dicoccoides]	P2C06_ORYSJ RecName: Full=Probable protein phosphatase 2C 6 {ECO:0000305}; Short=OsPP2C06 {ECO:0000303|PubMed:19021904}; EC=3.1.3.16 {ECO:0000305}; AltName: Full=ABI1-like protein 1 {ECO:0000305}; Short=OsABI-LIKE1 {ECO:0000303|PubMed:26491145}; Short=OsABIL1 {ECO:0000303|PubMed:26491145};	A0A077RRP1_WHEAT RecName: Full=Protein-serine/threonine phosphatase {ECO:0000256|ARBA:ARBA00013081}; EC=3.1.3.16 {ECO:0000256|ARBA:ARBA00013081};	Serine/threonine protein phosphatase	GO:0005829,cytosol; GO:0005634,nucleus; GO:0046872,metal ion binding; GO:0017018,myosin phosphatase activity; GO:0004722,protein serine/threonine phosphatase activity; GO:0009738,abscisic acid-activated signaling pathway; GO:0035970,peptidyl-threonine dephosphorylation; GO:0003674,molecular_function; GO:0005488,binding; GO:0043167,ion binding; GO:0043169,cation binding; GO:0003824,catalytic activ…	Protein phosphatase 2C	--	--	--
Cluster-118746.2	0.87	0.46	0.67	17.33	18.05	18.36	117	69	89	2243	2739	2356	4.79526	4.45523e-246	6.9905e-244	up	5730	K00827 alanine-glyoxylate transaminase / (R)-3-amino-2-methylpropionate-pyruvate transaminase [EC:2.6.1.44 2.6.1.40] | (RefSeq) alanine--glyoxylate aminotransferase 2 homolog 3, mitochondrial-like (A)	ko00250: Alanine, aspartate and glutamate metabolism; ko00260: Glycine, serine and threonine metabolism; ko00270: Cysteine and methionine metabolism; ko00280: Valine, leucine and isoleucine degradation; ko01100: Metabolic pathways; ko01110: Biosynthesis of secondary metabolites	TOM1-like protein 7 [Triticum urartu]	AGT22_ARATH RecName: Full=Alanine--glyoxylate aminotransferase 2 homolog 2, mitochondrial; EC=2.6.1.44; AltName: Full=Beta-alanine-pyruvate aminotransferase 2; Flags: Precursor;	A0A3B5ZXQ4_WHEAT SubName: Full=Uncharacterized protein {ECO:0000313|EnsemblPlants:TraesCS1D02G292400.3};	Alanine-glyoxylate aminotransferase AGT2	GO:0005739,mitochondrion; GO:0008453,alanine-glyoxylate transaminase activity; GO:0030170,pyridoxal phosphate binding; GO:0009853,photorespiration; GO:0003674,molecular_function; GO:0003824,catalytic activity; GO:0008483,transaminase activity; GO:0016740,transferase activity; GO:0016769,transferase activity, transferring nitrogenous groups; GO:0005488,binding; GO:0019842,vitamin binding; GO:00360…	Aminotransferase class-III	--	--	--
Cluster-43628.18	54.04	45.39	39.12	283.69	273.41	272.63	265	259	240	1399	1600	1355	2.57563	1.12078e-244	1.75355e-242	up	696	K24028 salicylic acid 3-hydroxylase [EC:1.14.11.-] | (RefSeq) flavanone 3-dioxygenase 2-like (A)	--	2-oxoglutarate-Fe(II) type oxidoreductase hxnY-like [Triticum aestivum]	ODD33_ORYSJ RecName: Full=2-oxoglutarate-dependent dioxygenase 33 {ECO:0000303|PubMed:25728912}; EC=1.14.11.- {ECO:0000255|PROSITE-ProRule:PRU00805, ECO:0000269|PubMed:25728912}; AltName: Full=Melatonin 2-hydroxylase {ECO:0000303|PubMed:25728912};	A0A453TBG0_AEGTS RecName: Full=Fe2OG dioxygenase domain-containing protein {ECO:0000259|PROSITE:PS51471};	Iron/ascorbate family oxidoreductases	GO:0005737,cytoplasm; GO:0051213,dioxygenase activity; GO:0031418,L-ascorbic acid binding; GO:0046872,metal ion binding; GO:0003674,molecular_function; GO:0003824,catalytic activity; GO:0016491,oxidoreductase activity; GO:0005488,binding; GO:0019842,vitamin binding; GO:0030246,carbohydrate binding; GO:0031406,carboxylic acid binding; GO:0036094,small molecule binding; GO:0043167,ion binding; GO:0…	non-haem dioxygenase in morphine synthesis N-terminal	--	--	--
Cluster-128230.6	33.33	33.53	35.75	82.43	84.02	83.12	1589	1757	1673	3732	4457	3724	1.31143	1.23257e-244	1.92295e-242	up	2208	K01623 fructose-bisphosphate aldolase, class I [EC:4.1.2.13] | (RefSeq) fructose-bisphosphate aldolase 1, cytoplasmic (A)	ko00010: Glycolysis / Gluconeogenesis; ko00030: Pentose phosphate pathway; ko00051: Fructose and mannose metabolism; ko00710: Carbon fixation in photosynthetic organisms; ko01100: Metabolic pathways; ko01110: Biosynthesis of secondary metabolites; ko01200: Carbon metabolism; ko01230: Biosynthesis of amino acids	unnamed protein product [Triticum turgidum subsp. durum]	ALFC1_ORYSJ RecName: Full=Fructose-bisphosphate aldolase 1, cytoplasmic {ECO:0000305}; EC=4.1.2.13 {ECO:0000250|UniProtKB:Q9SJQ9}; AltName: Full=Cytoplasmic aldolase {ECO:0000303|PubMed:2374721}; Short=cALD {ECO:0000303|PubMed:2374721}; AltName: Full=Gravity-specific protein GSC 233 {ECO:0000303|PubMed:1363521};	A0A446NXD6_TRITD RecName: Full=Fructose-bisphosphate aldolase {ECO:0000256|ARBA:ARBA00013068, ECO:0000256|RuleBase:RU003994}; EC=4.1.2.13 {ECO:0000256|ARBA:ARBA00013068, ECO:0000256|RuleBase:RU003994};	Fructose-biphosphate aldolase	GO:0005737,cytoplasm; GO:0005829,cytosol; GO:0004332,fructose-bisphosphate aldolase activity; GO:0030388,fructose 1,6-bisphosphate metabolic process; GO:0006094,gluconeogenesis; GO:0006096,glycolytic process; GO:0048364,root development; GO:0003674,molecular_function; GO:0003824,catalytic activity; GO:0016829,lyase activity; GO:0016830,carbon-carbon lyase activity; GO:0016832,aldehyde-lyase activ…	Fructose-bisphosphate aldolase class-I	--	--	--
Cluster-22352.41	586.43	616.67	599.17	263.88	257.84	254.52	4644	5281	4661	1946	2225	1826	-1.21656	4.70615e-244	7.32127e-242	down	622	K08912 light-harvesting complex II chlorophyll a/b binding protein 1 | (RefSeq) chlorophyll a-b binding protein of LHCII type 1-like (A)	ko00196: Photosynthesis - antenna proteins; ko01100: Metabolic pathways	unnamed protein product [Triticum turgidum subsp. durum]	CB22_ORYSJ RecName: Full=Chlorophyll a-b binding protein 2, chloroplastic; AltName: Full=LHCII type I CAB-2; Short=LHCP; Flags: Precursor;	A0A446J6B2_TRITD RecName: Full=Chlorophyll a-b binding protein, chloroplastic {ECO:0000256|RuleBase:RU363080};	--	GO:0009535,chloroplast thylakoid membrane; GO:0016021,integral component of membrane; GO:0009522,photosystem I; GO:0009523,photosystem II; GO:0016168,chlorophyll binding; GO:0046872,metal ion binding; GO:0015979,photosynthesis; GO:0009768,photosynthesis, light harvesting in photosystem I; GO:0009416,response to light stimulus; GO:0003674,molecular_function; GO:0005488,binding; GO:0046906,tetrapyr…	Chlorophyll A-B binding protein	--	--	--
Cluster-51797.9	68.7	68.34	70.09	28.9	27.74	27.46	4233	4634	4240	1692	1904	1592	-1.27181	3.97654e-243	6.16871e-241	down	2764	K18723 nucleoporin GLE1 | (RefSeq) protein GLE1-like isoform X1 (A)	ko03013: Nucleocytoplasmic transport; ko03015: mRNA surveillance pathway	Nucleoporin GLE1 [Triticum urartu]	STR11_ARATH RecName: Full=Rhodanese-like domain-containing protein 11, chloroplastic; AltName: Full=Sulfurtransferase 11; Short=AtStr11; Flags: Precursor;	M7ZSH7_TRIUA RecName: Full=mRNA export factor GLE1 {ECO:0000256|ARBA:ARBA00026227}; AltName: Full=Nucleoporin GLE1 {ECO:0000256|ARBA:ARBA00029983};	--	GO:0009507,chloroplast; GO:0005829,cytosol; GO:0005575,cellular_component; GO:0005622,intracellular anatomical structure; GO:0005737,cytoplasm; GO:0009536,plastid; GO:0043226,organelle; GO:0043227,membrane-bounded organelle; GO:0043229,intracellular organelle; GO:0043231,intracellular membrane-bounded organelle; GO:0110165,cellular anatomical entity	GLE1-like protein	--	--	--
Cluster-60457.0	343.15	358.23	349.82	136.17	125.18	131.34	7397	8462	7406	2784	2990	2637	-1.3989	3.25289e-242	5.03188e-240	down	1511	K02871 large subunit ribosomal protein L13 | (RefSeq) uncharacterized protein LOC109782430 (A)	ko03010: Ribosome	50S ribosomal protein L13 [Aegilops tauschii subsp. strangulata]	RK13_SPIOL RecName: Full=50S ribosomal protein L13, chloroplastic {ECO:0000303|PubMed:10874046}; AltName: Full=CL13; AltName: Full=Chloroplastic large ribosomal subunit protein uL13c {ECO:0000303|PubMed:28007896}; Flags: Precursor;	A0A453FEH1_AEGTS SubName: Full=Uncharacterized protein {ECO:0000313|EnsemblPlants:AET3Gv20651400.1};	Mitochondrial/chloroplast ribosomal protein L13	GO:0009507,chloroplast; GO:0022625,cytosolic large ribosomal subunit; GO:0005840,ribosome; GO:0003729,mRNA binding; GO:0003735,structural constituent of ribosome; GO:0017148,negative regulation of translation; GO:0006412,translation; GO:0003674,molecular_function; GO:0003676,nucleic acid binding; GO:0003723,RNA binding; GO:0005488,binding; GO:0097159,organic cyclic compound binding; GO:1901363,he…	Ribosomal protein L13	--	--	--
Cluster-139004.2	36.03	39.68	36.82	119	120.48	112.4	1658	2012	1657	5232	6182	4854	1.6761	5.2844e-242	8.15138e-240	up	4815	K01803 triosephosphate isomerase (TIM) [EC:5.3.1.1] | (RefSeq) triosephosphate isomerase, cytosolic-like (A)	ko00010: Glycolysis / Gluconeogenesis; ko00051: Fructose and mannose metabolism; ko00562: Inositol phosphate metabolism; ko00710: Carbon fixation in photosynthetic organisms; ko01100: Metabolic pathways; ko01110: Biosynthesis of secondary metabolites; ko01200: Carbon metabolism; ko01230: Biosynthesis of amino acids	synaptotagmin-5-like [Hordeum vulgare]	SYT5_ARATH RecName: Full=Synaptotagmin-5; AltName: Full=NTMC2T2.1; AltName: Full=Synaptotagmin E;	A0A453N6A2_AEGTS SubName: Full=Uncharacterized protein {ECO:0000313|EnsemblPlants:AET6Gv20255100.7};	Ca2+-dependent lipid-binding protein CLB1/vesicle protein vp115/Granuphilin A, contains C2 domain	GO:0012505,endomembrane system; GO:0005783,endoplasmic reticulum; GO:0016021,integral component of membrane; GO:0033011,perinuclear theca; GO:0009506,plasmodesma; GO:0008289,lipid binding; GO:0046872,metal ion binding; GO:0006869,lipid transport; GO:0003674,molecular_function; GO:0005488,binding; GO:0043167,ion binding; GO:0043169,cation binding; GO:0006810,transport; GO:0008150,biological_proces…	--	--	--	--
Cluster-141323.12	3.84	4.55	6.26	87.38	91.55	86.77	55	71	88	1165	1416	1139	4.18251	1.14511e-241	1.76142e-239	up	889	--	--	low-temperature-induced 65 kDa protein-like isoform X1 [Triticum aestivum]	--	A0A3B5ZT54_WHEAT SubName: Full=Uncharacterized protein {ECO:0000313|EnsemblPlants:TraesCS1D02G163800.2};	--	GO:0009737,response to abscisic acid; GO:0008150,biological_process; GO:0009719,response to endogenous stimulus; GO:0009725,response to hormone; GO:0010033,response to organic substance; GO:0033993,response to lipid; GO:0042221,response to chemical; GO:0050896,response to stimulus; GO:0097305,response to alcohol; GO:1901700,response to oxygen-containing compound	--	--	--	--
Cluster-141323.2	2.46	2.9	3.08	65.99	70.67	66.48	41	53	51	1051	1318	1041	4.61838	2.43942e-241	3.74182e-239	up	980	--	--	low-temperature-induced 65 kDa protein-like isoform X2 [Hordeum vulgare subsp. vulgare]	--	F2D3S4_HORVV SubName: Full=Predicted protein {ECO:0000313|EMBL:BAJ89745.1};	--	GO:0009737,response to abscisic acid; GO:0008150,biological_process; GO:0009719,response to endogenous stimulus; GO:0009725,response to hormone; GO:0010033,response to organic substance; GO:0033993,response to lipid; GO:0042221,response to chemical; GO:0050896,response to stimulus; GO:0097305,response to alcohol; GO:1901700,response to oxygen-containing compound	--	--	--	--
Cluster-138129.1	129.38	129	119.97	365.9	385.28	378.01	2899	3167	2640	7752	9562	7896	1.59822	1.02726e-240	1.57131e-238	up	1200	--	--	uncharacterized protein LOC123423862 [Hordeum vulgare subsp. vulgare]	LTI6B_ORYSI RecName: Full=Hydrophobic protein LTI6B; AltName: Full=Low temperature-induced protein 6B;	A0A8I6WN09_HORVV SubName: Full=Uncharacterized protein {ECO:0000313|EnsemblPlants:HORVU.MOREX.r3.1HG0018260.1};	Stress responsive protein	GO:0016021,integral component of membrane; GO:0005575,cellular_component; GO:0016020,membrane; GO:0031224,intrinsic component of membrane; GO:0110165,cellular anatomical entity	--	--	--	--
Cluster-118692.2	110.27	109.89	100.25	350.03	356.16	337.93	2661	2907	2376	7992	9527	7612	1.72577	2.84045e-240	4.33267e-238	up	1269	--	--	MD-2-related lipid-recognition protein ROSY1 [Aegilops tauschii subsp. strangulata]	ROSY1_ARATH RecName: Full=MD-2-related lipid-recognition protein ROSY1 {ECO:0000305}; AltName: Full=Protein INTERACTOR OF SYNAPTOTAGMIN 1 {ECO:0000303|PubMed:27044028}; Flags: Precursor;	A0A453BM92_AEGTS RecName: Full=ML domain-containing protein {ECO:0000259|SMART:SM00737};	Uncharacterized conserved protein, contains ML domain	GO:0005737,cytoplasm; GO:0008429,phosphatidylethanolamine binding; GO:0032934,sterol binding; GO:0032366,intracellular sterol transport; GO:0009958,positive gravitropism; GO:0009651,response to salt stress; GO:0015918,sterol transport; GO:0003674,molecular_function; GO:0005488,binding; GO:0005543,phospholipid binding; GO:0008289,lipid binding; GO:0005496,steroid binding; GO:0097159,organic cyclic…	ML domain	--	--	--
Cluster-89038.4	7.02	6.18	6.07	83.66	79.52	85.32	98	95	84	1103	1228	1106	3.70071	4.4071e-239	6.70369e-237	up	868	--	--	hypothetical protein ZWY2020_030018 [Hordeum vulgare]	--	A0A446TU94_TRITD SubName: Full=Uncharacterized protein {ECO:0000313|EMBL:VAI26946.1};	--	GO:0016021,integral component of membrane; GO:0005575,cellular_component; GO:0016020,membrane; GO:0031224,intrinsic component of membrane; GO:0110165,cellular anatomical entity	--	--	--	--
Cluster-22085.1	3.65	4.82	4.4	35.1	39.83	36.23	241	350	285	2203	2930	2253	3.13966	5.07056e-239	7.69152e-237	up	2940	K03549 KUP system potassium uptake protein | (RefSeq) probable potassium transporter 16 (A)	--	putative potassium transporter 16 [Hordeum vulgare]	HAK16_ORYSJ RecName: Full=Probable potassium transporter 16; AltName: Full=OsHAK16;	A0A3B6PRH3_WHEAT RecName: Full=Potassium transporter {ECO:0000256|RuleBase:RU321113};	--	GO:0016021,integral component of membrane; GO:0016020,membrane; GO:0015079,potassium ion transmembrane transporter activity; GO:0006813,potassium ion transport; GO:0003674,molecular_function; GO:0005215,transporter activity; GO:0008324,cation transmembrane transporter activity; GO:0015075,ion transmembrane transporter activity; GO:0015318,inorganic molecular entity transmembrane transporter activ…	K+ potassium transporter	--	--	--
Cluster-138169.5	10.49	8.79	7.91	82.99	88.22	90.68	281	258	208	2107	2624	2272	3.29233	7.84406e-239	1.18658e-236	up	1376	K13071 pheophorbide a oxygenase [EC:1.14.15.17] | (RefSeq) pheophorbide a oxygenase, chloroplastic (A)	ko00860: Porphyrin metabolism; ko01110: Biosynthesis of secondary metabolites	predicted protein [Hordeum vulgare subsp. vulgare]	PTC52_ARATH RecName: Full=Protochlorophyllide-dependent translocon component 52, chloroplastic; AltName: Full=ACD1-like protein; AltName: Full=Protein TIC 55-IV; AltName: Full=Translocon at the inner envelope membrane of chloroplasts 55-IV; Flags: Precursor;	F2D3M1_HORVV SubName: Full=Predicted protein {ECO:0000313|EMBL:BAJ89692.1};	--	GO:0009941,chloroplast envelope; GO:0009706,chloroplast inner membrane; GO:0005737,cytoplasm; GO:0005829,cytosol; GO:0016021,integral component of membrane; GO:0009536,plastid; GO:0051537,2 iron, 2 sulfur cluster binding; GO:0010277,chlorophyllide a oxygenase [overall] activity; GO:0046872,metal ion binding; GO:0016491,oxidoreductase activity; GO:0015031,protein transport; GO:0003674,molecular_fu…	Pheophorbide a oxygenase	--	--	--
Cluster-66528.7	231.8	239.4	258.33	550.91	552.36	534.48	9147	10320	9963	20468	24149	19676	1.19099	1.91129e-238	2.88325e-236	up	1882	K12472 epidermal growth factor receptor substrate 15 | (RefSeq) filaggrin-like (A)	ko04144: Endocytosis	BURP domain-containing protein 3-like [Triticum aestivum]	BURP3_ORYSJ RecName: Full=BURP domain-containing protein 3; Short=OsBURP03; Flags: Precursor;	A0A3B6EIA4_WHEAT RecName: Full=BURP domain-containing protein {ECO:0000259|PROSITE:PS51277};	--	--	BURP domain	--	--	--
Cluster-92762.3	39.97	44.92	50.92	1061.48	925.97	925.67	71	83	89	1682	1707	1366	4.35704	2.02469e-238	3.04594e-236	up	363	--	--	uncharacterized acetyltransferase At3g50280-like [Triticum dicoccoides]	Y3028_ARATH RecName: Full=Uncharacterized acetyltransferase At3g50280; EC=2.3.1.-;	T1LAY4_TRIUA SubName: Full=Uncharacterized protein {ECO:0000313|EnsemblPlants:TRIUR3_01666-P1};	--	GO:0016746,acyltransferase activity; GO:0003674,molecular_function; GO:0003824,catalytic activity; GO:0016740,transferase activity	Transferase family	--	--	--
Cluster-105734.3	8.49	8.48	8.33	23.58	22.73	23.52	1228	1351	1185	3248	3672	3212	1.49567	2.67839e-238	4.01832e-236	up	6198	K09264 MADS-box transcription factor, plant | (RefSeq) MADS-box transcription factor 23-like isoform X1 (A)	--	transmembrane protein 131 [Aegilops tauschii subsp. strangulata]	MAD47_ORYSJ RecName: Full=MADS-box transcription factor 47 {ECO:0000305}; AltName: Full=MADS-domain-containing protein 1 {ECO:0000303|PubMed:16827922}; Short=OsMDP1 {ECO:0000303|PubMed:16827922}; AltName: Full=OsMADS47 {ECO:0000303|PubMed:14701936};	A0A3B6JN08_WHEAT SubName: Full=Uncharacterized protein {ECO:0000313|EnsemblPlants:TraesCS4D02G301000.1};	MADS box transcription factor	GO:0005634,nucleus; GO:0003700,DNA-binding transcription factor activity; GO:0000981,DNA-binding transcription factor activity, RNA polymerase II-specific; GO:0046983,protein dimerization activity; GO:0000978,RNA polymerase II cis-regulatory region sequence-specific DNA binding; GO:0009742,brassinosteroid mediated signaling pathway; GO:0045944,positive regulation of transcription by RNA polymeras…	SRF-type transcription factor (DNA-binding and dimerisation domain)	MADS-MIKC	TF	MADS->MADS-MIKC
Cluster-80400.0	37.85	36.1	36.84	89.64	87.66	90.22	1952	2052	1910	4534	5177	4467	1.32698	8.14348e-238	1.21841e-235	up	2435	K19892 glucan endo-1,3-beta-glucosidase 4 [EC:3.2.1.39] | (RefSeq) glucan endo-1,3-beta-glucosidase 4-like (A)	ko00500: Starch and sucrose metabolism; ko01100: Metabolic pathways	glucan endo-1,3-beta-glucosidase isoform X1 [Triticum dicoccoides]	E13B_WHEAT RecName: Full=Glucan endo-1,3-beta-glucosidase; EC=3.2.1.39; AltName: Full=(1->3)-beta-glucan endohydrolase; Short=(1->3)-beta-glucanase; AltName: Full=Beta-1,3-endoglucanase; Flags: Precursor;	A0A3B6IRG1_WHEAT RecName: Full=X8 domain-containing protein {ECO:0000259|SMART:SM00768};	--	GO:0046658,anchored component of plasma membrane; GO:0042973,glucan endo-1,3-beta-D-glucosidase activity; GO:0005975,carbohydrate metabolic process; GO:0006952,defense response; GO:0003674,molecular_function; GO:0003824,catalytic activity; GO:0004553,hydrolase activity, hydrolyzing O-glycosyl compounds; GO:0008422,beta-glucosidase activity; GO:0015926,glucosidase activity; GO:0016787,hydrolase ac…	Glycosyl hydrolases family 17	--	--	--
Cluster-104388.4	4.07	3.48	3.22	28.92	28.63	29.25	204	192	158	1381	1602	1382	3.04343	2.3513e-237	3.50838e-235	up	2312	--	--	glycosyltransferase family 92 protein Os08g0121900-like [Triticum dicoccoides]	Y8219_ORYSJ RecName: Full=Glycosyltransferase family 92 protein Os08g0121900; EC=2.4.1.- {ECO:0000305};	A0A446YZI3_TRITD RecName: Full=Glycosyltransferase family 92 protein {ECO:0000256|RuleBase:RU366017}; EC=2.4.1.- {ECO:0000256|RuleBase:RU366017};	--	GO:0016021,integral component of membrane; GO:0016757,glycosyltransferase activity; GO:0003674,molecular_function; GO:0003824,catalytic activity; GO:0016740,transferase activity; GO:0005575,cellular_component; GO:0016020,membrane; GO:0031224,intrinsic component of membrane; GO:0110165,cellular anatomical entity	Glycosyltransferase family 92	--	--	--
Cluster-132048.10	30.32	32.1	31.55	102.39	109.59	103.71	726	841	740	2317	2906	2311	1.77068	4.41219e-237	6.56553e-235	up	1893	K13719 ubiquitin thioesterase OTU1 [EC:3.1.2.-] | (RefSeq) ubiquitin thioesterase OTU1 (A)	ko04141: Protein processing in endoplasmic reticulum	OVARIAN TUMOR DOMAIN-containing deubiquitinating enzyme 2 [Aegilops tauschii subsp. strangulata]	OTU2_ARATH RecName: Full=OVARIAN TUMOR DOMAIN-containing deubiquitinating enzyme 2 {ECO:0000303|PubMed:24659992}; Short=OTU domain-containing protein 2 {ECO:0000303|PubMed:24659992}; EC=3.4.19.12 {ECO:0000269|PubMed:24659992}; AltName: Full=Deubiquitinating enzyme OTU2 {ECO:0000303|PubMed:24659992};	W5GQY7_WHEAT RecName: Full=Ubiquitin thioesterase OTU1 {ECO:0000256|RuleBase:RU367104}; EC=3.4.19.12 {ECO:0000256|RuleBase:RU367104};	OTU-like cysteine protease	GO:0005634,nucleus; GO:0004843,cysteine-type deubiquitinase activity; GO:0030968,endoplasmic reticulum unfolded protein response; GO:0016579,protein deubiquitination; GO:0030433,ubiquitin-dependent ERAD pathway; GO:0003674,molecular_function; GO:0003824,catalytic activity; GO:0008233,peptidase activity; GO:0008234,cysteine-type peptidase activity; GO:0016787,hydrolase activity; GO:0019783,ubiquit…	--	--	--	--
Cluster-56379.7	12.14	11.15	12.92	65.64	70.93	63.66	362	363	377	1859	2360	1801	2.50867	1.19363e-236	1.77136e-234	up	1595	K13260 isoflavone/4'-methoxyisoflavone 2'-hydroxylase [EC:1.14.14.90 1.14.14.89] | (RefSeq) cytochrome P450 81Q32-like (A)	ko00943: Isoflavonoid biosynthesis; ko01100: Metabolic pathways; ko01110: Biosynthesis of secondary metabolites	cytochrome P450 81Q32 [Aegilops tauschii subsp. strangulata]	CYQ32_CATRO RecName: Full=Cytochrome P450 81Q32 {ECO:0000303|PubMed:24710322}; Short=CrCYP81Q32 {ECO:0000303|PubMed:24710322}; EC=1.14.-.- {ECO:0000305};	A0A453BPT2_AEGTS SubName: Full=Uncharacterized protein {ECO:0000313|EnsemblPlants:AET2Gv20588000.1};	Cytochrome P450 CYP2 subfamily	GO:0016021,integral component of membrane; GO:0020037,heme binding; GO:0005506,iron ion binding; GO:0004497,monooxygenase activity; GO:0016705,oxidoreductase activity, acting on paired donors, with incorporation or reduction of molecular oxygen; GO:0003674,molecular_function; GO:0005488,binding; GO:0046906,tetrapyrrole binding; GO:0097159,organic cyclic compound binding; GO:1901363,heterocyclic c…	Cytochrome P450	--	--	--
Cluster-8049.6	25.65	25.21	28.82	142.98	157.29	158.67	364	390	402	1911	2462	2083	2.54379	1.28171e-236	1.89693e-234	up	873	--	--	glycine-rich cell wall structural protein 2-like [Triticum aestivum]	ASR2_SOLLC RecName: Full=Abscisic stress-ripening protein 2 {ECO:0000303|PubMed:7846175};	A0A453GTC5_AEGTS SubName: Full=Uncharacterized protein {ECO:0000313|EnsemblPlants:AET3Gv21198900.12};	--	--	ABA/WDS induced protein	--	--	--
Cluster-108826.1	200.64	186.82	187.14	48.34	51.25	49.54	4183	4265	3832	952	1183	961	-1.92581	2.38299e-236	3.50786e-234	down	1138	--	--	classical arabinogalactan protein 9-like [Triticum dicoccoides]	--	F2DA84_HORVV SubName: Full=Predicted protein {ECO:0000313|EMBL:BAJ92005.1};	--	GO:0005886,plasma membrane; GO:0005575,cellular_component; GO:0016020,membrane; GO:0071944,cell periphery; GO:0110165,cellular anatomical entity	--	--	--	--
Cluster-122110.3	24.71	24.68	22.12	83.33	83.9	83.18	1496	1638	1312	4783	5642	4741	1.83645	3.63522e-234	5.33685e-232	up	2758	K19891 glucan endo-1,3-beta-glucosidase 1/2/3 [EC:3.2.1.39] | (RefSeq) O-Glycosyl hydrolases family 17 protein (A)	ko00500: Starch and sucrose metabolism; ko01100: Metabolic pathways	glucan endo-1,3-beta-glucosidase 14-like isoform X2 [Triticum dicoccoides]	E1314_ARATH RecName: Full=Glucan endo-1,3-beta-glucosidase 14; EC=3.2.1.39; AltName: Full=(1->3)-beta-glucan endohydrolase 14; Short=(1->3)-beta-glucanase 14; AltName: Full=Beta-1,3-endoglucanase 14; Short=Beta-1,3-glucanase 14; Flags: Precursor;	A0A077RWF5_WHEAT SubName: Full=Uncharacterized protein {ECO:0000313|EMBL:CDM85083.1, ECO:0000313|EnsemblPlants:TraesCS3B02G406200.1};	--	GO:0046658,anchored component of plasma membrane; GO:0005737,cytoplasm; GO:0005576,extracellular region; GO:0005634,nucleus; GO:0042973,glucan endo-1,3-beta-D-glucosidase activity; GO:0005975,carbohydrate metabolic process; GO:0071555,cell wall organization; GO:0006952,defense response; GO:0003674,molecular_function; GO:0003824,catalytic activity; GO:0004553,hydrolase activity, hydrolyzing O-glyc…	Glycosyl hydrolases family 17	--	--	--
Cluster-129432.0	31.73	33.93	31.04	89.12	89.04	90.97	963	1046	959	2543	2952	2539	1.50231	1.52616e-233	2.23456e-231	up	2265	K26392 stomatin-like protein 2 | (RefSeq) hypothetical protein (A)	--	hypersensitive-induced response protein 4 [Hordeum vulgare subsp. vulgare]	HIR4_ARATH RecName: Full=Hypersensitive-induced response protein 4; Short=AtHIR4;	A0A453QJP9_AEGTS RecName: Full=PHB domain-containing protein {ECO:0000259|SMART:SM00244};	Prohibitins and stomatins of the PID superfamily	GO:0005794,Golgi apparatus; GO:0000325,plant-type vacuole; GO:0005886,plasma membrane; GO:0009506,plasmodesma; GO:0009536,plastid; GO:0005773,vacuole; GO:0005575,cellular_component; GO:0005622,intracellular anatomical structure; GO:0005737,cytoplasm; GO:0012505,endomembrane system; GO:0043226,organelle; GO:0043227,membrane-bounded organelle; GO:0043229,intracellular organelle; GO:0043231,intracel…	SPFH domain / Band 7 family	--	--	--
Cluster-112628.0	9.75	11.37	10.25	42.21	40.21	40.79	429	527	443	1719	2011	1657	2.0112	7.64538e-233	1.11643e-230	up	2804	--	--	uncharacterized protein LOC123088106 isoform X3 [Triticum aestivum]	--	A0A446RH01_TRITD RecName: Full=TMEM135_C_rich domain-containing protein {ECO:0000259|Pfam:PF15982};	Uncharacterized conserved protein	GO:0016021,integral component of membrane; GO:0005575,cellular_component; GO:0016020,membrane; GO:0031224,intrinsic component of membrane; GO:0110165,cellular anatomical entity	Tim17/Tim22/Tim23/Pmp24 family	--	--	--
Cluster-124024.7	3.3	3.27	2.81	24.68	26.61	24.71	176	192	147	1254	1584	1243	3.04899	1.23182e-232	1.794e-230	up	2440	--	--	acyltransferase-like protein At1g54570, chloroplastic isoform X2 [Aegilops tauschii subsp. strangulata]	PES1_ARATH RecName: Full=Phytyl ester synthase 1, chloroplastic {ECO:0000303|PubMed:22623494}; EC=2.3.1.- {ECO:0000269|PubMed:22623494}; Flags: Precursor;	A0A3B6MTA0_WHEAT RecName: Full=Hydrolase_4 domain-containing protein {ECO:0000259|Pfam:PF12146};	--	GO:0009507,chloroplast; GO:0010287,plastoglobule; GO:0004144,diacylglycerol O-acyltransferase activity; GO:0006995,cellular response to nitrogen starvation; GO:0010150,leaf senescence; GO:0033306,phytol metabolic process; GO:0090693,plant organ senescence; GO:1904963,regulation of phytol biosynthetic process; GO:0010866,regulation of triglyceride biosynthetic process; GO:0019432,triglyceride bios…	Serine aminopeptidase, S33	--	--	--
Cluster-114670.1	1.08	1.14	1.28	19.12	20.38	18.52	60	69	70	1014	1267	973	4.09294	6.86033e-232	9.96477e-230	up	2534	K03511 DNA polymerase kappa [EC:2.7.7.7] | (RefSeq) DNA polymerase kappa (A)	--	synaptotagmin-3-like isoform X1 [Triticum aestivum]	SYT3_ARATH RecName: Full=Synaptotagmin-3; AltName: Full=NTMC2T1.3; AltName: Full=Synaptotagmin C;	A0A3B6SL82_WHEAT SubName: Full=Uncharacterized protein {ECO:0000313|EnsemblPlants:TraesCS7B02G347000.1};	Ca2+-dependent lipid-binding protein CLB1/vesicle protein vp115/Granuphilin A, contains C2 domain	GO:0005783,endoplasmic reticulum; GO:0016021,integral component of membrane; GO:0008289,lipid binding; GO:0046872,metal ion binding; GO:0006869,lipid transport; GO:0003674,molecular_function; GO:0005488,binding; GO:0043167,ion binding; GO:0043169,cation binding; GO:0006810,transport; GO:0008150,biological_process; GO:0010876,lipid localization; GO:0033036,macromolecule localization; GO:0051179,lo…	C2 domain	--	--	--
Cluster-85295.0	83.4	87.68	85.31	179.89	176.2	174.09	2951	3385	2951	6053	6930	5767	1.07983	7.82102e-232	1.13301e-229	up	2728	K02936 large subunit ribosomal protein L7Ae | (RefSeq) uncharacterized protein LOC108459204 (A)	ko03010: Ribosome	uncharacterized protein LOC123086845 [Triticum aestivum]	--	A0A3B6HZM9_WHEAT SubName: Full=Uncharacterized protein {ECO:0000313|EnsemblPlants:TraesCS4A02G236800.1};	--	--	Protein of unknown function (DUF760)	--	--	--
Cluster-128311.0	3.53	2.36	3.79	64.88	70.75	66.58	66	48	70	1160	1482	1172	4.43201	1.08106e-231	1.56197e-229	up	1062	K05765 cofilin | (RefSeq) actin-depolymerizing factor 3-like (A)	--	actin-depolymerizing factor 3-like [Triticum dicoccoides]	ADF3_ORYSJ RecName: Full=Actin-depolymerizing factor 3; Short=ADF-3; Short=OsADF3;	B5LQT1_HORVV SubName: Full=Actin depolymerization factor-like protein {ECO:0000313|EMBL:ACH70383.1}; SubName: Full=Adf2 {ECO:0000313|EMBL:ACH69772.1};	Actin depolymerizing factor	GO:0015629,actin cytoskeleton; GO:0005737,cytoplasm; GO:0051015,actin filament binding; GO:0030042,actin filament depolymerization; GO:0003674,molecular_function; GO:0003779,actin binding; GO:0005488,binding; GO:0005515,protein binding; GO:0008092,cytoskeletal protein binding; GO:0044877,protein-containing complex binding; GO:0006996,organelle organization; GO:0007010,cytoskeleton organization; G…	Cofilin/tropomyosin-type actin-binding protein	--	--	--
Cluster-140640.4	339.21	317.85	307.85	976.37	978.93	989.21	6885	7219	6064	19456	23208	19482	1.68828	1.41098e-231	2.0333e-229	up	1758	--	--	chaperonin-like RbcX protein 2, chloroplastic [Triticum dicoccoides]	RBCX2_ARATH RecName: Full=Chaperonin-like RbcX protein 2, chloroplastic {ECO:0000303|PubMed:21922322}; Short=AtRBCX2 {ECO:0000303|PubMed:21922322}; Flags: Precursor;	A0A446USM0_TRITD SubName: Full=Uncharacterized protein {ECO:0000313|EMBL:VAI38638.1};	--	GO:0009570,chloroplast stroma; GO:0044183,protein folding chaperone; GO:0015977,carbon fixation; GO:0061077,chaperone-mediated protein folding; GO:0015979,photosynthesis; GO:0110102,ribulose bisphosphate carboxylase complex assembly; GO:0003674,molecular_function; GO:0008150,biological_process; GO:0008152,metabolic process; GO:0071704,organic substance metabolic process; GO:0006457,protein foldin…	RbcX protein	--	--	--
Cluster-98934.1	46.91	43.11	42.42	145.36	149.8	146.71	1146	1152	1027	3385	4081	3401	1.77183	2.75892e-231	3.96531e-229	up	1333	--	--	hypothetical protein ZWY2020_037247 [Hordeum vulgare]	LTPG5_ARATH RecName: Full=Non-specific lipid transfer protein GPI-anchored 5 {ECO:0000303|PubMed:23893219}; Short=AtLTPG-5 {ECO:0000303|PubMed:23893219}; Short=Protein LTP-GPI-ANCHORED 5 {ECO:0000303|PubMed:23893219}; AltName: Full=Xylogen like protein 12 {ECO:0000303|PubMed:21558309}; Short=AtXYLP12 {ECO:0000303|PubMed:21558309}; Short=AtXYP8 {ECO:0000303|PubMed:21558309}; Flags: Precursor;	M8C9T6_AEGTA SubName: Full=Non-specific lipid-transfer protein-like protein {ECO:0000313|EMBL:EMT31079.1, ECO:0000313|EnsemblPlants:EMT31079};	--	GO:0031225,anchored component of membrane; GO:0005829,cytosol; GO:0005886,plasma membrane; GO:0008289,lipid binding; GO:0050832,defense response to fungus; GO:0006869,lipid transport; GO:0140426,PAMP-triggered immunity signalling pathway; GO:0002237,response to molecule of bacterial origin; GO:0002240,response to molecule of oomycetes origin; GO:0009624,response to nematode; GO:0003674,molecular_…	Probable lipid transfer	--	--	--
Cluster-47514.6	13.35	15.58	16.21	62.42	65.28	62.18	678	875	808	3010	3691	2969	2.09891	4.52476e-231	6.48627e-229	up	2866	K22389 phospholipase A1 [EC:3.1.1.32] | (RefSeq) lecithin-cholesterol acyltransferase-like 4 isoform X1 (A)	ko00564: Glycerophospholipid metabolism; ko00592: alpha-Linolenic acid metabolism; ko01100: Metabolic pathways; ko01110: Biosynthesis of secondary metabolites	lecithin-cholesterol acyltransferase-like 4 isoform X1 [Aegilops tauschii subsp. strangulata]	LCAT4_ARATH RecName: Full=Lecithin-cholesterol acyltransferase-like 4; EC=2.3.1.-;	A0A446MM52_TRITD SubName: Full=Uncharacterized protein {ECO:0000313|EMBL:VAH50907.1};	Lecithin:cholesterol acyltransferase (LCAT)/Acyl-ceramide synthase	GO:0005737,cytoplasm; GO:0005829,cytosol; GO:0008374,O-acyltransferase activity; GO:0004620,phospholipase activity; GO:0006629,lipid metabolic process; GO:0009395,phospholipid catabolic process; GO:0003674,molecular_function; GO:0003824,catalytic activity; GO:0016740,transferase activity; GO:0016746,acyltransferase activity; GO:0016747,acyltransferase activity, transferring groups other than amin…	Lecithin:cholesterol acyltransferase	--	--	--
Cluster-78236.0	287.77	290.11	277.12	90.88	98.83	92.51	5510	6079	5211	1643	2093	1647	-1.5792	2.15863e-230	3.08633e-228	down	1070	K02926 large subunit ribosomal protein L4 | (RefSeq) 50S ribosomal protein L4, chloroplastic-like (A)	ko03010: Ribosome	50S ribosomal protein L4, chloroplastic-like [Triticum dicoccoides]	RK4_ARATH RecName: Full=50S ribosomal protein L4, chloroplastic; AltName: Full=CL4; AltName: Full=R-protein L4; Flags: Precursor;	A0A446S8H1_TRITD SubName: Full=Uncharacterized protein {ECO:0000313|EMBL:VAI07430.1};	Mitochondrial/chloroplast ribosomal protein L4	GO:0009507,chloroplast; GO:0009570,chloroplast stroma; GO:0009535,chloroplast thylakoid membrane; GO:0022626,cytosolic ribosome; GO:0005576,extracellular region; GO:0005634,nucleus; GO:0000311,plastid large ribosomal subunit; GO:0009547,plastid ribosome; GO:0009579,thylakoid; GO:0003729,mRNA binding; GO:0008266,poly(U) RNA binding; GO:0019843,rRNA binding; GO:0003735,structural constituent of rib…	Ribosomal protein L4/L1 family	--	--	--
Cluster-69382.0	1.8	1.59	1.81	24.45	23.92	25.9	66	71	79	999	1146	1017	3.93818	2.9136e-229	4.14413e-227	up	2139	K14497 protein phosphatase 2C [EC:3.1.3.16] | (RefSeq) protein phosphatase 2C 51-like (A)	ko04016: MAPK signaling pathway - plant; ko04075: Plant hormone signal transduction	protein phosphatase 2C 51-like [Triticum aestivum]	P2C51_ORYSJ RecName: Full=Protein phosphatase 2C 51 {ECO:0000305}; Short=OsPP2C51 {ECO:0000303|PubMed:19021904}; EC=3.1.3.16 {ECO:0000269|PubMed:28000033};	A0A452ZYX8_AEGTS RecName: Full=Protein-serine/threonine phosphatase {ECO:0000256|ARBA:ARBA00013081}; EC=3.1.3.16 {ECO:0000256|ARBA:ARBA00013081};	Serine/threonine protein phosphatase	GO:0005634,nucleus; GO:0046872,metal ion binding; GO:0017018,myosin phosphatase activity; GO:0004722,protein serine/threonine phosphatase activity; GO:0009738,abscisic acid-activated signaling pathway; GO:0009788,negative regulation of abscisic acid-activated signaling pathway; GO:0035970,peptidyl-threonine dephosphorylation; GO:0010030,positive regulation of seed germination; GO:0003674,molecula…	Protein phosphatase 2C	--	--	--
Cluster-131296.3	22.78	22.52	22.91	107.26	102.93	102.65	350	392	351	1550	1733	1442	2.17802	1.00432e-228	1.42478e-226	up	2149	K17991 peroxygenase [EC:1.11.2.3] | (RefSeq) probable peroxygenase 5 (A)	ko00073: Cutin, suberine and wax biosynthesis	probable peroxygenase 5 [Brachypodium distachyon]	PXGL_ARATH RecName: Full=Probable inactive peroxygenase-like protein;	I1H890_BRADI SubName: Full=Uncharacterized protein {ECO:0000313|EMBL:KQK22972.1, ECO:0000313|EnsemblPlants:KQK22972};	--	GO:0005811,lipid droplet; GO:0005509,calcium ion binding; GO:0004497,monooxygenase activity; GO:0003674,molecular_function; GO:0005488,binding; GO:0043167,ion binding; GO:0043169,cation binding; GO:0046872,metal ion binding; GO:0003824,catalytic activity; GO:0016491,oxidoreductase activity; GO:0005575,cellular_component; GO:0005622,intracellular anatomical structure; GO:0043226,organelle; GO:0043…	Caleosin related protein	--	--	--
Cluster-22352.65	1874.82	2005.27	1945.84	924.62	945.89	967.64	4436	4973	4522	1968	2343	1935	-1.09252	1.53766e-228	2.17577e-226	down	392	K08912 light-harvesting complex II chlorophyll a/b binding protein 1 | (RefSeq) chlorophyll a-b binding protein of LHCII type 1-like (A)	ko00196: Photosynthesis - antenna proteins; ko01100: Metabolic pathways	chlorophyll a-b binding protein of LHCII type 1-like [Triticum dicoccoides]	CB21_MAIZE RecName: Full=Chlorophyll a-b binding protein 1, chloroplastic; AltName: Full=LHCII type I CAB-1; Short=LHCP; Flags: Precursor;	A0A446TBT8_TRITD RecName: Full=Chlorophyll a-b binding protein, chloroplastic {ECO:0000256|RuleBase:RU363080};	--	GO:0009535,chloroplast thylakoid membrane; GO:0016021,integral component of membrane; GO:0009522,photosystem I; GO:0009523,photosystem II; GO:0016168,chlorophyll binding; GO:0046872,metal ion binding; GO:0009768,photosynthesis, light harvesting in photosystem I; GO:0009416,response to light stimulus; GO:0003674,molecular_function; GO:0005488,binding; GO:0046906,tetrapyrrole binding; GO:0097159,or…	Chlorophyll A-B binding protein	--	--	--
Cluster-138415.0	166.76	168.88	170.89	77.49	76.14	76.69	4384	4876	4417	1929	2225	1888	-1.11311	1.58575e-228	2.23803e-226	down	1943	--	--	uncharacterized protein ycf23-like [Triticum aestivum]	YCF23_PORPU RecName: Full=Uncharacterized protein ycf23;	A0A3B6A2F2_WHEAT RecName: Full=Uncharacterized protein ycf23 {ECO:0000256|ARBA:ARBA00021523};	--	GO:0009507,chloroplast; GO:0005575,cellular_component; GO:0005622,intracellular anatomical structure; GO:0005737,cytoplasm; GO:0009536,plastid; GO:0043226,organelle; GO:0043227,membrane-bounded organelle; GO:0043229,intracellular organelle; GO:0043231,intracellular membrane-bounded organelle; GO:0110165,cellular anatomical entity	Protein of unknown function (DUF561)	--	--	--
Cluster-113440.1	21.72	24.57	21.8	68.67	69.55	69	1597	1955	1569	4743	5612	4628	1.61606	1.76799e-228	2.48882e-226	up	4637	K01213 galacturan 1,4-alpha-galacturonidase [EC:3.2.1.67] | (RefSeq) exopolygalacturonase-like (A)	ko00040: Pentose and glucuronate interconversions; ko01100: Metabolic pathways	exopolygalacturonase-like [Triticum aestivum]	PGLR3_MAIZE RecName: Full=Exopolygalacturonase; Short=ExoPG; EC=3.2.1.67; AltName: Full=Galacturan 1,4-alpha-galacturonidase; AltName: Full=Pectinase; Flags: Precursor;	A0A3B6QD91_WHEAT SubName: Full=Uncharacterized protein {ECO:0000313|EnsemblPlants:TraesCS6D02G153500.1};	--	GO:0005576,extracellular region; GO:0047911,galacturan 1,4-alpha-galacturonidase activity; GO:0004650,polygalacturonase activity; GO:0005975,carbohydrate metabolic process; GO:0071555,cell wall organization; GO:0003674,molecular_function; GO:0003824,catalytic activity; GO:0004553,hydrolase activity, hydrolyzing O-glycosyl compounds; GO:0016787,hydrolase activity; GO:0016798,hydrolase activity, ac…	Glycosyl hydrolases family 28	--	--	--
Cluster-120992.0	13.16	12.99	12.42	51.15	53.89	55.24	665	736	595	2373	2894	2480	2.02247	1.01243e-227	1.42155e-225	up	2485	K09286 EREBP-like factor | (RefSeq) ethylene-responsive transcription factor RAP2-9-like (A)	--	ethylene-responsive transcription factor RAP2-9-like [Triticum dicoccoides]	RAP29_ARATH RecName: Full=Ethylene-responsive transcription factor RAP2-9; AltName: Full=Protein RELATED TO APETALA2 9;	A0A453QU98_AEGTS RecName: Full=AP2/ERF domain-containing protein {ECO:0000259|PROSITE:PS51032};	--	GO:0005634,nucleus; GO:0003677,DNA binding; GO:0003700,DNA-binding transcription factor activity; GO:0009873,ethylene-activated signaling pathway; GO:0003674,molecular_function; GO:0003676,nucleic acid binding; GO:0005488,binding; GO:0097159,organic cyclic compound binding; GO:1901363,heterocyclic compound binding; GO:0140110,transcription regulator activity; GO:0000160,phosphorelay signal transd…	AP2 domain	AP2/ERF-ERF	TF	AP2/ERF->AP2/ERF-ERF
Cluster-129222.0	45.49	46.85	43.81	129.72	128.16	133.45	1656	1856	1552	4420	5100	4497	1.5367	9.21488e-227	1.29055e-224	up	4541	K08867 WNK lysine deficient protein kinase [EC:2.7.11.1] | (RefSeq) probable serine/threonine-protein kinase WNK8 (A)	--	unnamed protein product [Triticum turgidum subsp. durum]	WNK8_ORYSJ RecName: Full=Probable serine/threonine-protein kinase WNK8; Short=OsWNK8; EC=2.7.11.1; AltName: Full=Protein kinase with no lysine 8;	A0A446U3N4_TRITD RecName: Full=Protein kinase domain-containing protein {ECO:0000259|PROSITE:PS50011};	Serine/threonine protein kinase	GO:0005737,cytoplasm; GO:0005524,ATP binding; GO:0106310,protein serine kinase activity; GO:0004674,protein serine/threonine kinase activity; GO:0035556,intracellular signal transduction; GO:0006468,protein phosphorylation; GO:0000166,nucleotide binding; GO:0003674,molecular_function; GO:0005488,binding; GO:0017076,purine nucleotide binding; GO:0030554,adenyl nucleotide binding; GO:0032553,ribonu…	Protein kinase domain	--	--	--
Cluster-140042.7	21.15	15.35	18.48	167.08	159.63	164.85	434	347	374	3257	3645	3162	3.18438	5.45257e-226	7.59753e-224	up	1173	K08234 glyoxylase I family protein | (RefSeq) uncharacterized protein LOC110020254 (A)	--	uncharacterized protein LOC119267390 [Triticum dicoccoides]	GLYI4_ARATH RecName: Full=Glyoxylase I 4 {ECO:0000303|PubMed:30483284, ECO:0000303|PubMed:31652571}; Short=AtGLXI-like;4 {ECO:0000303|PubMed:30483284}; Short=AtGLYI4 {ECO:0000303|PubMed:21213008};	A0A446N9J3_TRITD RecName: Full=VOC domain-containing protein {ECO:0000259|PROSITE:PS51819};	--	GO:0005737,cytoplasm; GO:0005886,plasma membrane; GO:0016829,lyase activity; GO:0140041,cellular detoxification of methylglyoxal; GO:0006952,defense response; GO:0009787,regulation of abscisic acid-activated signaling pathway; GO:2000022,regulation of jasmonic acid mediated signaling pathway; GO:2000031,regulation of salicylic acid mediated signaling pathway; GO:0009409,response to cold; GO:00094…	Glyoxalase/Bleomycin resistance protein/Dioxygenase superfamily	--	--	--
Cluster-3150.87	473.07	492.15	508.39	91.48	136.7	124.24	3481	3721	3164	694	858	762	-2.09773	7.3692e-226	1.02421e-223	down	2803	K04730 interleukin-1 receptor-associated kinase 1 [EC:2.7.11.1] | (RefSeq) probable LRR receptor-like serine/threonine-protein kinase At3g47570 (A)	--	hypothetical protein CFC21_092836 [Triticum aestivum]	Y3475_ARATH RecName: Full=Probable LRR receptor-like serine/threonine-protein kinase At3g47570; EC=2.7.11.1; Flags: Precursor;	A0A3B6QF09_WHEAT RecName: Full=Protein kinase domain-containing protein {ECO:0000259|PROSITE:PS50011};	--	GO:0016021,integral component of membrane; GO:0005886,plasma membrane; GO:0005524,ATP binding; GO:0106310,protein serine kinase activity; GO:0004674,protein serine/threonine kinase activity; GO:0006468,protein phosphorylation; GO:0000166,nucleotide binding; GO:0003674,molecular_function; GO:0005488,binding; GO:0017076,purine nucleotide binding; GO:0030554,adenyl nucleotide binding; GO:0032553,rib…	Protein kinase domain	--	--	--
Cluster-3737.0	7.8	7.33	8.25	57.92	54.76	51.5	232	231	235	1563	1761	1366	2.81064	8.56018e-226	1.18672e-223	up	2233	K13356 alcohol-forming fatty acyl-CoA reductase [EC:1.2.1.84] | (RefSeq) fatty acyl-CoA reductase 1-like isoform X1 (A)	ko00073: Cutin, suberine and wax biosynthesis; ko04146: Peroxisome	unnamed protein product [Triticum turgidum subsp. durum]	FAR_SIMCH RecName: Full=Alcohol-forming fatty acyl-CoA reductase; EC=1.2.1.84;	A0A446Y131_TRITD RecName: Full=Fatty acyl-CoA reductase {ECO:0000256|RuleBase:RU363097}; EC=1.2.1.84 {ECO:0000256|RuleBase:RU363097};	Acyl-CoA reductase	GO:0102965,alcohol-forming fatty acyl-CoA reductase activity; GO:0080019,fatty-acyl-CoA reductase (alcohol-forming) activity; GO:0006629,lipid metabolic process; GO:0003674,molecular_function; GO:0003824,catalytic activity; GO:0016491,oxidoreductase activity; GO:0016620,oxidoreductase activity, acting on the aldehyde or oxo group of donors, NAD or NADP as acceptor; GO:0016903,oxidoreductase activ…	Male sterility protein	--	--	--
Cluster-140293.0	13.07	13.65	15.5	59.91	56.67	57.41	551	633	642	2399	2660	2275	2.07223	3.04645e-225	4.21271e-223	up	1994	K15639 PHYB activation tagged suppressor 1 [EC:1.14.-.-] | (RefSeq) cytochrome P450 734A1-like (A)	ko00905: Brassinosteroid biosynthesis; ko01110: Biosynthesis of secondary metabolites	xylan glycosyltransferase MUCI21 [Aegilops tauschii subsp. strangulata]	MUC21_ARATH RecName: Full=Xylan glycosyltransferase MUCI21 {ECO:0000305}; EC=2.4.-.- {ECO:0000305|PubMed:26482889}; AltName: Full=Protein MUCILAGE-MODIFIED 5 {ECO:0000303|PubMed:11706181}; AltName: Full=Protein MUCILAGE-RELATED 21 {ECO:0000303|PubMed:26482889}; AltName: Full=Putative xylan xylosyltransgerase MUCI21 {ECO:0000303|PubMed:26979331};	A0A452XMX4_AEGTS SubName: Full=Uncharacterized protein {ECO:0000313|EnsemblPlants:AET1Gv20068600.2};	Uncharacterized conserved protein	GO:0005794,Golgi apparatus; GO:0000139,Golgi membrane; GO:0016021,integral component of membrane; GO:0047517,1,4-beta-D-xylan synthase activity; GO:0016757,glycosyltransferase activity; GO:0071555,cell wall organization; GO:0010192,mucilage biosynthetic process; GO:0048354,mucilage biosynthetic process involved in seed coat development; GO:0003674,molecular_function; GO:0003824,catalytic activity…	Glycosyltransferase 61	--	--	--
Cluster-78125.0	2.12	2.07	1.33	36.77	39.58	36.27	70	75	43	1149	1449	1120	4.36841	4.75453e-225	6.55814e-223	up	1621	K03327 multidrug resistance protein, MATE family | (RefSeq) uncharacterized protein LOC112898208 (A)	--	uncharacterized protein LOC109758865 [Aegilops tauschii subsp. strangulata]	FBK4_ARATH RecName: Full=Putative F-box/kelch-repeat protein At1g15680;	A0A453RMN9_AEGTS RecName: Full=F-box domain-containing protein {ECO:0000259|SMART:SM00256};	--	--	F-box domain	--	--	--
Cluster-137672.2	8.94	9.91	10.42	38.86	41.69	39.54	430	520	492	1776	2186	1779	2.05728	7.09021e-225	9.75527e-223	up	2320	K07198 5'-AMP-activated protein kinase, catalytic alpha subunit [EC:2.7.11.11] | (RefSeq) serine/threonine protein kinase OSK4 isoform X1 (A)	--	unnamed protein product [Triticum turgidum subsp. durum]	OSK4_ORYSI RecName: Full=Serine/threonine protein kinase OSK4 {ECO:0000250|UniProtKB:Q852Q1}; Short=OsK4 {ECO:0000250|UniProtKB:Q852Q1}; EC=2.7.11.1 {ECO:0000250|UniProtKB:Q852Q1};	A0A446QT77_TRITD SubName: Full=Uncharacterized protein {ECO:0000313|EMBL:VAH89804.1};	Serine/threonine protein kinase	GO:0005634,nucleus; GO:0005524,ATP binding; GO:0106310,protein serine kinase activity; GO:0004674,protein serine/threonine kinase activity; GO:0006468,protein phosphorylation; GO:0000166,nucleotide binding; GO:0003674,molecular_function; GO:0005488,binding; GO:0017076,purine nucleotide binding; GO:0030554,adenyl nucleotide binding; GO:0032553,ribonucleotide binding; GO:0032555,purine ribonucleoti…	Kinase associated domain 1	--	--	--
Cluster-124484.5	85.64	84.77	85.27	195.12	192.64	201.42	2736	2974	2676	5910	6836	6028	1.22932	7.38102e-225	1.01299e-222	up	1581	--	--	chitinase 1-like [Hordeum vulgare subsp. vulgare]	CHIT1_TULSB RecName: Full=Chitinase 1; EC=3.2.1.14; AltName: Full=Tulip bulb chitinase-1; Short=TBC-1; Flags: Precursor;	M0YW47_HORVV SubName: Full=Uncharacterized protein {ECO:0000313|EnsemblPlants:HORVU.MOREX.r3.7HG0714390.1.CDS1};	--	GO:0008061,chitin binding; GO:0004568,chitinase activity; GO:0006032,chitin catabolic process; GO:0000272,polysaccharide catabolic process; GO:0003674,molecular_function; GO:0005488,binding; GO:0097367,carbohydrate derivative binding; GO:0003824,catalytic activity; GO:0004553,hydrolase activity, hydrolyzing O-glycosyl compounds; GO:0016787,hydrolase activity; GO:0016798,hydrolase activity, acting…	Glycosyl hydrolases family 18	--	--	--
Cluster-122199.3	116.64	122.82	111.23	25.7	26.27	28.29	3511	4058	3288	733	878	797	-2.10398	1.14965e-224	1.57387e-222	down	1507	K16292 KDEL-tailed cysteine endopeptidase [EC:3.4.22.-] | (RefSeq) senescence-specific cysteine protease SAG39 (A)	--	senescence-specific cysteine protease SAG39-like [Lolium rigidum]	SAG39_ORYSJ RecName: Full=Senescence-specific cysteine protease SAG39 {ECO:0000305}; EC=3.4.22.- {ECO:0000305}; AltName: Full=Cysteine proteinase SAG39 {ECO:0000305}; AltName: Full=Protein SENESCENCE-ASSOCIATED GENE 39 {ECO:0000303|PubMed:20439547}; Flags: Precursor;	A0A0Q3H4V7_BRADI SubName: Full=Uncharacterized protein {ECO:0000313|EMBL:KQK17871.1, ECO:0000313|EnsemblPlants:KQK17871};	Cysteine proteinase Cathepsin L	GO:0005615,extracellular space; GO:0005764,lysosome; GO:0010282,senescence-associated vacuole; GO:0004197,cysteine-type endopeptidase activity; GO:0007568,aging; GO:0010150,leaf senescence; GO:0010623,programmed cell death involved in cell development; GO:0051603,proteolysis involved in protein catabolic process; GO:0009737,response to abscisic acid; GO:0009723,response to ethylene; GO:0009739,re…	Papain family cysteine protease	--	--	--
Cluster-127072.4	27.32	29.38	28.97	118.39	123.04	120.12	339	405	387	1516	1828	1495	2.1615	2.77943e-224	3.79555e-222	up	1232	K08730 phosphatidylserine synthase 2 [EC:2.7.8.29] | (RefSeq) CDP-diacylglycerol--serine O-phosphatidyltransferase 3 (A)	ko00564: Glycerophospholipid metabolism; ko01100: Metabolic pathways; ko01110: Biosynthesis of secondary metabolites	protein SRC2-like [Triticum aestivum]	SRC2_SOYBN RecName: Full=Protein SRC2 {ECO:0000305}; AltName: Full=Protein SOYBEAN GENE REGULATED BY COLD 2 {ECO:0000303|Ref.1};	A0A453GGR4_AEGTS RecName: Full=C2 domain-containing protein {ECO:0000259|PROSITE:PS50004};	--	GO:0005789,endoplasmic reticulum membrane; GO:0016021,integral component of membrane; GO:0005886,plasma membrane; GO:0032586,protein storage vacuole membrane; GO:0006952,defense response; GO:0006950,response to stress; GO:0008150,biological_process; GO:0050896,response to stimulus; GO:0005575,cellular_component; GO:0005622,intracellular anatomical structure; GO:0005737,cytoplasm; GO:0005783,endop…	C2 domain	--	--	--
Cluster-45578.8	16.36	16.11	41.29	83.69	87.07	80.14	321	346	348	1551	1890	1463	2.33406	1.3824e-223	1.88309e-221	up	1089	K08900 mitochondrial chaperone BCS1 | (RefSeq) AAA-ATPase At3g50940-like (A)	--	unnamed protein product [Triticum turgidum subsp. durum]	AATP9_ARATH RecName: Full=AAA-ATPase At3g28580; EC=3.6.1.- {ECO:0000250|UniProtKB:Q9FLD5};	A0A446YRP8_TRITD RecName: Full=AAA domain-containing protein {ECO:0000259|SMART:SM00382};	AAA+-type ATPase	GO:0005783,endoplasmic reticulum; GO:0016021,integral component of membrane; GO:0005524,ATP binding; GO:0016887,ATP hydrolysis activity; GO:0009737,response to abscisic acid; GO:0000304,response to singlet oxygen; GO:0000166,nucleotide binding; GO:0003674,molecular_function; GO:0005488,binding; GO:0017076,purine nucleotide binding; GO:0030554,adenyl nucleotide binding; GO:0032553,ribonucleotide b…	Domain associated at C-terminal with AAA	--	--	--
Cluster-7964.13	138.8	156.04	155.7	45.12	45.7	47.16	5319	6570	5860	1640	1943	1695	-1.68156	4.43285e-223	6.02339e-221	down	1835	K20623 typhasterol/6-deoxotyphasterol 2alpha-hydroxylase | (RefSeq) trimethyltridecatetraene synthase-like (A)	ko00905: Brassinosteroid biosynthesis; ko01100: Metabolic pathways; ko01110: Biosynthesis of secondary metabolites	trimethyltridecatetraene synthase-like [Triticum urartu]	C92C6_MAIZE RecName: Full=Trimethyltridecatetraene synthase {ECO:0000303|PubMed:27662898}; EC=1.14.14.58 {ECO:0000269|PubMed:27662898}; AltName: Full=Cytochrome P-450 20 {ECO:0000312|EMBL:ONM27923.1}; AltName: Full=Cytochrome P450 92C6 {ECO:0000303|PubMed:27662898};	A0A3B6LM36_WHEAT SubName: Full=Uncharacterized protein {ECO:0000313|EnsemblPlants:TraesCS5B02G209100.1};	Cytochrome P450 CYP2 subfamily	GO:0016021,integral component of membrane; GO:0097007,4,8,12-trimethyltrideca-1,3,7,11-tetraene synthase activity; GO:0020037,heme binding; GO:0005506,iron ion binding; GO:0010333,terpene synthase activity; GO:0080027,response to herbivore; GO:0016114,terpenoid biosynthetic process; GO:0003674,molecular_function; GO:0003824,catalytic activity; GO:0004497,monooxygenase activity; GO:0016491,oxidore…	Cytochrome P450	--	--	--
Cluster-73811.0	14.42	12.36	12.68	96.63	85.9	99.14	477	449	412	3031	3157	3073	2.86097	1.45218e-222	1.96835e-220	up	1626	--	--	uncharacterized protein LOC109738534 [Aegilops tauschii subsp. strangulata]	--	A0A453F0R5_AEGTS SubName: Full=Uncharacterized protein {ECO:0000313|EnsemblPlants:AET3Gv20535900.2};	--	--	--	--	--	--
Cluster-81654.2	34.56	35.02	34.41	80.91	79.25	76.11	2197	2451	2148	4890	5614	4557	1.21318	1.17201e-220	1.58468e-218	up	2843	K07407 alpha-galactosidase [EC:3.2.1.22] | (RefSeq) alpha-galactosidase 3-like (A)	ko00052: Galactose metabolism; ko00561: Glycerolipid metabolism; ko00600: Sphingolipid metabolism; ko00603: Glycosphingolipid biosynthesis - globo and isoglobo series; ko01100: Metabolic pathways	alpha-galactosidase 3 isoform X1 [Aegilops tauschii subsp. strangulata]	AGAL3_ARATH RecName: Full=Alpha-galactosidase 3 {ECO:0000303|PubMed:15034167}; Short=AtAGAL3 {ECO:0000303|PubMed:15034167}; EC=3.2.1.22 {ECO:0000250|UniProtKB:Q9FXT4}; AltName: Full=Alpha-D-galactoside galactohydrolase 3 {ECO:0000305}; AltName: Full=Melibiase {ECO:0000305}; Flags: Precursor;	A0A453AP71_AEGTS RecName: Full=Alpha-galactosidase {ECO:0000256|ARBA:ARBA00012755, ECO:0000256|RuleBase:RU361168}; EC=3.2.1.22 {ECO:0000256|ARBA:ARBA00012755, ECO:0000256|RuleBase:RU361168}; AltName: Full=Melibiase {ECO:0000256|RuleBase:RU361168};	Alpha-D-galactosidase (melibiase)	GO:0048046,apoplast; GO:0009505,plant-type cell wall; GO:0000325,plant-type vacuole; GO:0099503,secretory vesicle; GO:0005773,vacuole; GO:0004557,alpha-galactosidase activity; GO:0052692,raffinose alpha-galactosidase activity; GO:0005975,carbohydrate metabolic process; GO:0071555,cell wall organization; GO:0003674,molecular_function; GO:0003824,catalytic activity; GO:0004553,hydrolase activity, h…	FBD	--	--	--
Cluster-127561.3	7.02	6.3	6.59	35.08	37.38	36.12	280	276	258	1330	1660	1354	2.47822	3.24769e-220	4.38038e-218	up	1900	K19044 E3 ubiquitin-protein ligase XBAT32/33 [EC:2.3.2.27] | (RefSeq) probable E3 ubiquitin-protein ligase XBOS33 (A)	--	F-box protein PP2-A13-like [Triticum dicoccoides]	P2A13_ARATH RecName: Full=F-box protein PP2-A13; AltName: Full=Protein PHLOEM PROTEIN 2-LIKE A13; Short=AtPP2-A13; AltName: Full=SKP1-interacting partner 9;	R7W3R3_AEGTA RecName: Full=F-box domain-containing protein {ECO:0000259|PROSITE:PS50181};	--	GO:0005634,nucleus; GO:0016567,protein ubiquitination; GO:0006807,nitrogen compound metabolic process; GO:0008150,biological_process; GO:0008152,metabolic process; GO:0019538,protein metabolic process; GO:0032446,protein modification by small protein conjugation; GO:0036211,protein modification process; GO:0043170,macromolecule metabolic process; GO:0043412,macromolecule modification; GO:0044238,…	Phloem protein 2	--	--	--
Cluster-95706.0	288.24	299.56	295.77	104.25	115.99	110.89	12875	14713	12974	4421	5764	4653	-1.388	3.30787e-220	4.45059e-218	down	2088	K00218 protochlorophyllide reductase [EC:1.3.1.33] | (RefSeq) protochlorophyllide reductase B, chloroplastic (A)	ko00860: Porphyrin metabolism; ko01100: Metabolic pathways; ko01110: Biosynthesis of secondary metabolites	protochlorophyllide reductase B, chloroplastic [Triticum dicoccoides]	PORB_HORVU RecName: Full=Protochlorophyllide reductase B, chloroplastic; Short=PCR B; EC=1.3.1.33; AltName: Full=NADPH-protochlorophyllide oxidoreductase B; Short=POR B; Flags: Precursor;	A0A452YKJ4_AEGTS RecName: Full=NADPH-protochlorophyllide oxidoreductase {ECO:0000256|RuleBase:RU365001}; EC=1.3.1.33 {ECO:0000256|RuleBase:RU365001};	Dehydrogenases with different specificities (related to short-chain alcohol dehydrogenases)	GO:0009507,chloroplast; GO:0016630,protochlorophyllide reductase activity; GO:0015995,chlorophyll biosynthetic process; GO:0015979,photosynthesis; GO:0003674,molecular_function; GO:0003824,catalytic activity; GO:0016491,oxidoreductase activity; GO:0016627,oxidoreductase activity, acting on the CH-CH group of donors; GO:0016628,oxidoreductase activity, acting on the CH-CH group of donors, NAD or N…	short chain dehydrogenase	--	--	--
Cluster-133058.2	81.29	78.12	66.66	413.71	429.83	444.03	530	548	426	2500	3039	2600	2.50148	4.9525e-220	6.64703e-218	up	566	--	--	unnamed protein product [Triticum turgidum subsp. durum]	--	A0A446XTZ5_TRITD RecName: Full=Phytocyanin domain-containing protein {ECO:0000259|PROSITE:PS51485};	--	GO:0009055,electron transfer activity; GO:0003674,molecular_function; GO:0003824,catalytic activity; GO:0016491,oxidoreductase activity	--	--	--	--
Cluster-128825.1	16.1	16.37	16.86	44.37	44.2	44.68	908	1016	933	2377	2775	2371	1.46249	6.61179e-220	8.85236e-218	up	2556	K20891 beta-glucuronosyltransferase [EC:2.4.1.-] | (RefSeq) beta-glucuronosyltransferase GlcAT14A-like (A)	--	beta-glucuronosyltransferase GlcAT14A-like [Hordeum vulgare subsp. vulgare]	GT14A_ARATH RecName: Full=Beta-glucuronosyltransferase GlcAT14A {ECO:0000305}; EC=2.4.1.- {ECO:0000305}; AltName: Full=GT14 family glucuronic acid transferase 1 {ECO:0000305}; Short=AtGlcAT14A {ECO:0000303|PubMed:24128328};	F2DJQ7_HORVV SubName: Full=Predicted protein {ECO:0000313|EMBL:BAJ95328.1};	Branching enzyme	GO:0005794,Golgi apparatus; GO:0000139,Golgi membrane; GO:0016021,integral component of membrane; GO:0015020,glucuronosyltransferase activity; GO:0009826,unidimensional cell growth; GO:0003674,molecular_function; GO:0003824,catalytic activity; GO:0008194,UDP-glycosyltransferase activity; GO:0016740,transferase activity; GO:0016757,glycosyltransferase activity; GO:0016758,hexosyltransferase activi…	Core-2/I-Branching enzyme	--	--	--
Cluster-117729.0	27.39	28.62	29.93	65.49	65.72	63.39	1818	2082	1937	4124	4819	3930	1.20576	1.07135e-219	1.43091e-217	up	3924	K03884 NADH-ubiquinone oxidoreductase chain 6 [EC:7.1.1.2] | (RefSeq) uncharacterized protein LOC109243048 (A)	ko00190: Oxidative phosphorylation; ko01100: Metabolic pathways	hypothetical protein TRIUR3_23445 [Triticum urartu]	NIN1_ORYSJ RecName: Full=Neutral/alkaline invertase 1, mitochondrial {ECO:0000305}; Short=OsNIN1 {ECO:0000303|PubMed:17086397}; EC=3.2.1.26 {ECO:0000269|PubMed:17086397}; Flags: Precursor;	A0A8I6X5H6_HORVV RecName: Full=Alkaline/neutral invertase {ECO:0000256|RuleBase:RU367047}; EC=3.2.1.26 {ECO:0000256|RuleBase:RU367047};	--	GO:0005739,mitochondrion; GO:0033926,glycopeptide alpha-N-acetylgalactosaminidase activity; GO:0004575,sucrose alpha-glucosidase activity; GO:0005987,sucrose catabolic process; GO:0003674,molecular_function; GO:0003824,catalytic activity; GO:0004553,hydrolase activity, hydrolyzing O-glycosyl compounds; GO:0016787,hydrolase activity; GO:0016798,hydrolase activity, acting on glycosyl bonds; GO:0140…	Alkaline and neutral invertase	--	--	--
Cluster-82849.0	46.85	50.02	50.28	122.91	118.48	116.54	1785	2115	1895	4474	5049	4193	1.3096	4.77822e-218	6.36631e-216	up	1844	K07198 5'-AMP-activated protein kinase, catalytic alpha subunit [EC:2.7.11.11] | (RefSeq) CBL-interacting protein kinase 5-like (A)	--	hypothetical protein CFC21_103890 [Triticum aestivum]	CIPKP_ORYSJ RecName: Full=CBL-interacting protein kinase 25; EC=2.7.11.1; AltName: Full=OsCIPK25;	A0A3B6SIN3_WHEAT RecName: Full=Non-specific serine/threonine protein kinase {ECO:0000256|ARBA:ARBA00012513}; EC=2.7.11.1 {ECO:0000256|ARBA:ARBA00012513};	Serine/threonine protein kinase	GO:0005524,ATP binding; GO:0106310,protein serine kinase activity; GO:0004674,protein serine/threonine kinase activity; GO:0006468,protein phosphorylation; GO:0007165,signal transduction; GO:0000166,nucleotide binding; GO:0003674,molecular_function; GO:0005488,binding; GO:0017076,purine nucleotide binding; GO:0030554,adenyl nucleotide binding; GO:0032553,ribonucleotide binding; GO:0032555,purine …	Protein kinase domain	--	--	--
Cluster-109775.0	76.37	73.17	75.74	224.23	228.69	240.58	1101	1151	1075	3050	3647	3212	1.63972	2.49416e-217	3.31505e-215	up	1007	--	--	loricrin [Aegilops tauschii subsp. strangulata]	ASR2_SOLLC RecName: Full=Abscisic stress-ripening protein 2 {ECO:0000303|PubMed:7846175};	A0A3B6DDG1_WHEAT SubName: Full=ABA/WDS induced protein {ECO:0000313|EMBL:QJQ28942.1};	--	--	ABA/WDS induced protein	--	--	--
Cluster-134163.0	39.27	40.94	41.32	127.23	141.07	143.22	1939	2224	2004	5970	7757	6652	1.78879	3.01734e-217	4.00071e-215	up	2277	K13606 chlorophyll(ide) b reductase [EC:1.1.1.294] | (RefSeq) probable chlorophyll(ide) b reductase NYC1, chloroplastic (A)	ko00860: Porphyrin metabolism; ko01100: Metabolic pathways; ko01110: Biosynthesis of secondary metabolites	probable chlorophyll(ide) b reductase NYC1, chloroplastic [Aegilops tauschii subsp. strangulata]	NYC1_ORYSJ RecName: Full=Probable chlorophyll(ide) b reductase NYC1, chloroplastic; EC=1.1.1.294; AltName: Full=Protein NON-YELLOW COLORING 1; Short=OsNYC1; Flags: Precursor;	A0A453EHK7_AEGTS SubName: Full=Uncharacterized protein {ECO:0000313|EnsemblPlants:AET3Gv20345000.2};	Reductases with broad range of substrate specificities	GO:0009535,chloroplast thylakoid membrane; GO:0016021,integral component of membrane; GO:0009536,plastid; GO:0034256,chlorophyll(ide) b reductase activity; GO:0016491,oxidoreductase activity; GO:0015996,chlorophyll catabolic process; GO:0010304,PSII associated light-harvesting complex II catabolic process; GO:0003674,molecular_function; GO:0003824,catalytic activity; GO:0016614,oxidoreductase act…	short chain dehydrogenase	--	--	--
Cluster-34138.13	4.57	3.79	3.45	41.61	42.74	47.92	168	154	132	1516	1776	1700	3.52666	5.60641e-217	7.41563e-215	up	1924	--	--	zinc finger protein SNAI2 [Aegilops tauschii subsp. strangulata]	ZAT11_ARATH RecName: Full=Zinc finger protein ZAT11;	A0A453FW45_AEGTS SubName: Full=Uncharacterized protein {ECO:0000313|EnsemblPlants:AET3Gv20802200.1};	FOG: Zn-finger	GO:0005634,nucleus; GO:0003700,DNA-binding transcription factor activity; GO:0046872,metal ion binding; GO:0000976,transcription cis-regulatory region binding; GO:0071289,cellular response to nickel ion; GO:2000280,regulation of root development; GO:0006355,regulation of DNA-templated transcription; GO:0010200,response to chitin; GO:0003674,molecular_function; GO:0140110,transcription regulator a…	C2H2-type zinc finger	C2H2	TF	C2H2
Cluster-36900.23	7	8.09	8.91	64.43	65.71	68.98	129	163	161	1123	1341	1183	3.07581	7.42777e-217	9.80108e-215	up	1043	K23452 UDP-glucosyltransferase 85A [EC:2.4.1.-] | (RefSeq) UDP-glycosyltransferase 85A1-like (A)	ko00908: Zeatin biosynthesis; ko01110: Biosynthesis of secondary metabolites	7-deoxyloganetin glucosyltransferase-like [Triticum dicoccoides]	UGT2_GARJA RecName: Full=7-deoxyloganetin glucosyltransferase; EC=2.4.1.324; AltName: Full=Genipin glucosyltransferase; AltName: Full=UDP-glucose glucosyltransferase 2; Short=GjUGT2; AltName: Full=UDP-glycosyltransferase 85A24;	A0A446WLW1_TRITD SubName: Full=Uncharacterized protein {ECO:0000313|EMBL:VAI61126.1};	UDP-glucuronosyl and UDP-glucosyl transferase	GO:0035251,UDP-glucosyltransferase activity; GO:0003674,molecular_function; GO:0003824,catalytic activity; GO:0008194,UDP-glycosyltransferase activity; GO:0016740,transferase activity; GO:0016757,glycosyltransferase activity; GO:0016758,hexosyltransferase activity; GO:0046527,glucosyltransferase activity	--	--	--	--
Cluster-107106.3	10.55	11.96	10.96	165.79	143.53	163.25	84	103	86	1238	1255	1187	3.82525	2.48915e-216	3.27658e-214	up	626	--	--	uncharacterized protein LOC119344914 [Triticum dicoccoides]	IBBWP_MAIZE RecName: Full=Bowman-Birk type wound-induced proteinase inhibitor WIP1; Flags: Precursor;	A0A452Z643_AEGTS RecName: Full=BOWMAN_BIRK domain-containing protein {ECO:0000259|SMART:SM00269};	--	GO:0005576,extracellular region; GO:0004867,serine-type endopeptidase inhibitor activity; GO:0003674,molecular_function; GO:0004857,enzyme inhibitor activity; GO:0004866,endopeptidase inhibitor activity; GO:0030234,enzyme regulator activity; GO:0030414,peptidase inhibitor activity; GO:0061134,peptidase regulator activity; GO:0061135,endopeptidase regulator activity; GO:0098772,molecular function …	--	--	--	--
Cluster-67957.6	497.86	474.76	483.01	229.33	229.98	225.4	41233	43307	39283	18066	21233	17598	-1.05822	3.08494e-216	4.05111e-214	down	3610	K09753 cinnamoyl-CoA reductase [EC:1.2.1.44] | (RAP-DB) Os09g0262000; Similar to Cinnamoyl CoA reductase. (A)	ko00940: Phenylpropanoid biosynthesis; ko01100: Metabolic pathways; ko01110: Biosynthesis of secondary metabolites	ribulose bisphosphate carboxylase/oxygenase activase A, chloroplastic [Hordeum vulgare subsp. vulgare]	RCAA_HORVU RecName: Full=Ribulose bisphosphate carboxylase/oxygenase activase A, chloroplastic; Short=RA A; Short=RuBisCO activase A; Flags: Precursor;	A0A8I6X0F0_HORVV RecName: Full=ATPase_AAA_core domain-containing protein {ECO:0000259|Pfam:PF00004};	26S proteasome regulatory complex, ATPase RPT4	GO:0009570,chloroplast stroma; GO:0005524,ATP binding; GO:0016887,ATP hydrolysis activity; GO:0000166,nucleotide binding; GO:0003674,molecular_function; GO:0005488,binding; GO:0017076,purine nucleotide binding; GO:0030554,adenyl nucleotide binding; GO:0032553,ribonucleotide binding; GO:0032555,purine ribonucleotide binding; GO:0032559,adenyl ribonucleotide binding; GO:0035639,purine ribonucleosid…	ATPase family associated with various cellular activities (AAA)	--	--	--
Cluster-7502.39	450.6	474.75	441.87	89.72	94.28	84.26	1542	1722	1486	279	343	249	-2.38378	9.53149e-216	1.24867e-213	down	439	--	--	proline-rich protein 4-like [Triticum dicoccoides]	PRP4_ARATH RecName: Full=Proline-rich protein 4; Short=AtPRP4; Flags: Precursor;	A0A3B6AQY5_WHEAT SubName: Full=Uncharacterized protein {ECO:0000313|EnsemblPlants:TraesCS2A02G062200.1};	--	GO:0005576,extracellular region; GO:0005575,cellular_component; GO:0110165,cellular anatomical entity	Pollen protein Ole e 1 like	--	--	--
Cluster-81922.3	16.96	16.43	14.07	82.6	88.26	88.65	829	884	675	3838	4806	4077	2.4786	2.10864e-215	2.75583e-213	up	2258	K19893 glucan endo-1,3-beta-glucosidase 5/6 [EC:3.2.1.39] | (RefSeq) glucan endo-1,3-beta-glucosidase 6-like (A)	ko00500: Starch and sucrose metabolism; ko01100: Metabolic pathways	glucan endo-1,3-beta-glucosidase 8-like [Triticum urartu]	E138_ARATH RecName: Full=Glucan endo-1,3-beta-glucosidase 8; EC=3.2.1.39; AltName: Full=(1->3)-beta-glucan endohydrolase 8; Short=(1->3)-beta-glucanase 8; AltName: Full=Beta-1,3-endoglucanase 8; Short=Beta-1,3-glucanase 8; Flags: Precursor;	A0A8I6Y9J2_HORVV RecName: Full=X8 domain-containing protein {ECO:0000259|SMART:SM00768};	--	GO:0031225,anchored component of membrane; GO:0046658,anchored component of plasma membrane; GO:0048046,apoplast; GO:0005634,nucleus; GO:0005886,plasma membrane; GO:0009506,plasmodesma; GO:0042973,glucan endo-1,3-beta-D-glucosidase activity; GO:0005975,carbohydrate metabolic process; GO:0006952,defense response; GO:0009664,plant-type cell wall organization; GO:0003674,molecular_function; GO:00038…	Glycosyl hydrolases family 17	--	--	--
Cluster-45766.3	16.67	15.52	13.99	89.24	95.88	95.68	309	315	256	1570	1993	1666	2.63439	3.581e-214	4.66894e-212	up	1182	K10752 histone-binding protein RBBP4 | (RefSeq) WD-40 repeat-containing protein MSI3-like (A)	ko03082: ATP-dependent chromatin remodeling; ko03083: Polycomb repressive complex	heavy metal-associated isoprenylated plant protein 20-like isoform X2 [Triticum dicoccoides]	HIP20_ARATH RecName: Full=Heavy metal-associated isoprenylated plant protein 20 {ECO:0000303|PubMed:21072340, ECO:0000303|PubMed:23368984}; Short=AtHIP20 {ECO:0000303|PubMed:23368984}; Short=AtHIPP20 {ECO:0000303|PubMed:21072340}; Flags: Precursor;	Q84L61_HORVV SubName: Full=Farnesylated protein 3 {ECO:0000313|EMBL:CAD70173.1};	Copper chaperone	GO:0016020,membrane; GO:0046872,metal ion binding; GO:0055073,cadmium ion homeostasis; GO:0071585,detoxification of cadmium ion; GO:0003674,molecular_function; GO:0005488,binding; GO:0043167,ion binding; GO:0043169,cation binding; GO:0008150,biological_process; GO:0042592,homeostatic process; GO:0048878,chemical homeostasis; GO:0050801,ion homeostasis; GO:0055065,metal ion homeostasis; GO:0055076…	--	--	--	--
Cluster-97205.0	42.84	43.51	42.97	116.74	119	121.41	926	1026	911	2389	2892	2448	1.49778	7.88727e-214	1.02591e-211	up	1576	--	--	uncharacterized protein LOC123396814 [Hordeum vulgare subsp. vulgare]	--	F2CQA0_HORVV SubName: Full=Predicted protein {ECO:0000313|EMBL:BAJ85021.1};	--	--	--	--	--	--
Cluster-130642.10	0.83	0.52	0.76	10.8	10.55	10.04	105	73	95	1318	1508	1215	3.94757	1.83725e-213	2.38408e-211	up	5419	K14085 aldehyde dehydrogenase family 7 member A1 [EC:1.2.1.31 1.2.1.8 1.2.1.3] | (RefSeq) aldehyde dehydrogenase family 7 member A1 (A)	ko00010: Glycolysis / Gluconeogenesis; ko00053: Ascorbate and aldarate metabolism; ko00071: Fatty acid degradation; ko00260: Glycine, serine and threonine metabolism; ko00280: Valine, leucine and isoleucine degradation; ko00310: Lysine degradation; ko00330: Arginine and proline metabolism; ko00340: Histidine metabolism; ko00380: Tryptophan metabolism; ko00410: beta-Alanine metabolism; ko00561: Gl…	predicted protein, partial [Hordeum vulgare subsp. vulgare]	AL7A1_MALDO RecName: Full=Aldehyde dehydrogenase family 7 member A1; EC=1.2.1.3; AltName: Full=Antiquitin-1; AltName: Full=Matured fruit 60 kDa protein; Short=MF-60;	A0A453KUB5_AEGTS RecName: Full=Aldehyde dehydrogenase (NAD(+)) {ECO:0000256|ARBA:ARBA00024226}; EC=1.2.1.3 {ECO:0000256|ARBA:ARBA00024226};	Aldehyde dehydrogenase	GO:0004029,aldehyde dehydrogenase (NAD+) activity; GO:0043878,glyceraldehyde-3-phosphate dehydrogenase (NAD+) (non-phosphorylating) activity; GO:0006081,cellular aldehyde metabolic process; GO:0003674,molecular_function; GO:0003824,catalytic activity; GO:0004030,aldehyde dehydrogenase [NAD(P)+] activity; GO:0016491,oxidoreductase activity; GO:0016620,oxidoreductase activity, acting on the aldehyd…	Aldehyde dehydrogenase family	--	--	--
Cluster-81010.9	37.96	40	40.27	110.74	100.03	102.38	1692	1954	1661	4238	4860	4312	1.40569	7.12874e-213	9.22861e-211	up	2240	K01188 beta-glucosidase [EC:3.2.1.21] | (RefSeq) beta-glucosidase 31-like (A)	ko00460: Cyanoamino acid metabolism; ko00500: Starch and sucrose metabolism; ko00999: Biosynthesis of various plant secondary metabolites; ko01100: Metabolic pathways; ko01110: Biosynthesis of secondary metabolites	unnamed protein product [Triticum turgidum subsp. durum]	BGL31_ORYSJ RecName: Full=Beta-glucosidase 31; Short=Os9bglu31; EC=3.2.1.21; Flags: Precursor;	A0A446UFR7_TRITD RecName: Full=4-hydroxy-7-methoxy-3-oxo-3,4-dihydro-2H-1,4-benzoxazin-2-yl glucosidebeta-D-glucosidase {ECO:0000256|ARBA:ARBA00012857}; EC=3.2.1.182 {ECO:0000256|ARBA:ARBA00012857};	Beta-glucosidase, lactase phlorizinhydrolase, and related proteins	GO:0033907,beta-D-fucosidase activity; GO:0004565,beta-galactosidase activity; GO:0008422,beta-glucosidase activity; GO:0102483,scopolin beta-glucosidase activity; GO:0005975,carbohydrate metabolic process; GO:0003674,molecular_function; GO:0003824,catalytic activity; GO:0004553,hydrolase activity, hydrolyzing O-glycosyl compounds; GO:0016787,hydrolase activity; GO:0016798,hydrolase activity, act…	Glycosyl hydrolase family 1	--	--	--
Cluster-82545.2	12.5	16.3	16.48	67.97	66.24	56.13	565	676	545	2197	2409	2081	1.97363	7.60165e-213	9.8176e-211	up	2112	K20660 cytochrome P450 family 709 | (RefSeq) cytochrome P450 709B1-like (A)	--	cytochrome P450 709B1-like [Triticum aestivum]	C7091_ARATH RecName: Full=Cytochrome P450 709B1 {ECO:0000305}; EC=1.14.-.- {ECO:0000305};	A0A453AZI3_AEGTS SubName: Full=Uncharacterized protein {ECO:0000313|EnsemblPlants:AET2Gv20312600.5};	Cytochrome P450 CYP4/CYP19/CYP26 subfamilies	GO:0016021,integral component of membrane; GO:0020037,heme binding; GO:0005506,iron ion binding; GO:0004497,monooxygenase activity; GO:0016705,oxidoreductase activity, acting on paired donors, with incorporation or reduction of molecular oxygen; GO:0003674,molecular_function; GO:0005488,binding; GO:0046906,tetrapyrrole binding; GO:0097159,organic cyclic compound binding; GO:1901363,heterocyclic c…	Cytochrome P450	--	--	--
Cluster-13106.6	123.09	113.34	96.3	22.27	15.5	31.01	1294	1438	1323	226	252	237	-2.43716	8.23973e-213	1.06167e-210	down	1104	--	--	hypothetical protein ZWY2020_024247 [Hordeum vulgare]	--	A0A1D5V157_WHEAT SubName: Full=Genome assembly, chromosome: II {ECO:0000313|EMBL:SPT17307.1};	--	--	--	--	--	--
Cluster-32774.0	49.04	43.5	42.76	181.37	191.83	190.76	1296	1261	1110	4539	5625	4713	2.08256	1.23086e-212	1.5822e-210	up	1381	--	--	hypothetical protein ZWY2020_048993 [Hordeum vulgare]	--	M8BWI7_AEGTA SubName: Full=Uncharacterized protein {ECO:0000313|EMBL:EMT11179.1, ECO:0000313|EnsemblPlants:EMT11179};	--	GO:0016021,integral component of membrane; GO:0005575,cellular_component; GO:0016020,membrane; GO:0031224,intrinsic component of membrane; GO:0110165,cellular anatomical entity	--	--	--	--
Cluster-75352.0	17.97	19.53	18.73	58.01	62.89	60.36	854	1021	874	2618	3326	2696	1.71624	1.91265e-212	2.45285e-210	up	2202	--	--	hypothetical protein CFC21_067802 [Triticum aestivum]	ZFP1_WHEAT RecName: Full=Zinc finger protein 1; AltName: Full=WZF1;	A0A3B6MX14_WHEAT SubName: Full=Uncharacterized protein {ECO:0000313|EnsemblPlants:TraesCS5D02G411400.1.cds1};	FOG: Zn-finger	GO:0005634,nucleus; GO:0003677,DNA binding; GO:0003700,DNA-binding transcription factor activity; GO:0046872,metal ion binding; GO:0003674,molecular_function; GO:0003676,nucleic acid binding; GO:0005488,binding; GO:0097159,organic cyclic compound binding; GO:1901363,heterocyclic compound binding; GO:0140110,transcription regulator activity; GO:0043167,ion binding; GO:0043169,cation binding; GO:00…	C2H2-type zinc finger	C2H2	TF	C2H2
Cluster-55566.2	55.25	48.96	51.18	119.2	124.37	137.29	1509	1641	1422	3545	4337	3617	1.395	7.50983e-212	9.60837e-210	up	1788	K19366 spartin | (RefSeq) senescence/dehydration-associated protein At3g51250-like (A)	ko04144: Endocytosis	protein EARLY-RESPONSIVE TO DEHYDRATION 7, chloroplastic-like [Hordeum vulgare subsp. vulgare]	ERD7_ARATH RecName: Full=Protein EARLY-RESPONSIVE TO DEHYDRATION 7, chloroplastic {ECO:0000303|PubMed:8075396}; Flags: Precursor;	A0A8I6Z7F1_HORVV RecName: Full=Senescence domain-containing protein {ECO:0000259|Pfam:PF06911};	--	GO:0009507,chloroplast; GO:0005886,plasma membrane; GO:0007623,circadian rhythm; GO:0009737,response to abscisic acid; GO:0009409,response to cold; GO:0009644,response to high light intensity; GO:0009651,response to salt stress; GO:0009414,response to water deprivation; GO:0008150,biological_process; GO:0048511,rhythmic process; GO:0009719,response to endogenous stimulus; GO:0009725,response to h…	Senescence domain	--	--	--
Cluster-138484.16	133.18	130.64	133.61	60.56	57.59	60.17	9017	9737	8883	3897	4344	3837	-1.12744	6.35975e-211	8.11795e-209	down	3007	K02641 ferredoxin--NADP+ reductase [EC:1.18.1.2] | (RefSeq) ferredoxin--NADP reductase, leaf isozyme 1, chloroplastic-like (A)	ko00195: Photosynthesis; ko01100: Metabolic pathways	Ferredoxin--NADP reductase, leaf isozyme, chloroplastic [Hordeum vulgare]	FENR1_ORYSI RecName: Full=Ferredoxin--NADP reductase, leaf isozyme 1, chloroplastic; Short=FNR; EC=1.18.1.2 {ECO:0000250|UniProtKB:Q9FKW6}; AltName: Full=Leaf FNR 1 {ECO:0000305}; Short=FNR-1 {ECO:0000305}; Short=Os-LFNR1 {ECO:0000305}; Flags: Precursor;	A0A453QC70_AEGTS RecName: Full=Ferredoxin--NADP reductase, chloroplastic {ECO:0000256|PIRNR:PIRNR000361}; Short=FNR {ECO:0000256|PIRNR:PIRNR000361}; EC=1.18.1.2 {ECO:0000256|PIRNR:PIRNR000361};	NADP/FAD dependent oxidoreductase	GO:0009570,chloroplast stroma; GO:0098807,chloroplast thylakoid membrane protein complex; GO:0004324,ferredoxin-NADP+ reductase activity; GO:0015979,photosynthesis; GO:0003674,molecular_function; GO:0003824,catalytic activity; GO:0008937,ferredoxin-NAD(P) reductase activity; GO:0016491,oxidoreductase activity; GO:0016730,oxidoreductase activity, acting on iron-sulfur proteins as donors; GO:001673…	EamA-like transporter family	--	--	--
Cluster-129315.1	16.22	15.93	13.77	85.06	81.87	87.54	352	379	294	1749	1972	1774	2.49124	9.73562e-210	1.23982e-207	up	1174	--	--	hypothetical protein CFC21_084669 [Triticum aestivum]	--	A0A453PPY3_AEGTS SubName: Full=Uncharacterized protein {ECO:0000313|EnsemblPlants:AET6Gv20810400.6};	--	--	--	--	--	--
Cluster-134886.0	1.61	1.5	1.6	17.79	19.82	17.8	93	95	91	977	1277	968	3.58936	4.7214e-209	5.99869e-207	up	2616	--	--	uncharacterized protein LOC119367273 [Triticum dicoccoides]	OPF17_ARATH RecName: Full=Transcription repressor OFP17; AltName: Full=Ovate family protein 17; Short=AtOFP17;	M8ARC5_AEGTA SubName: Full=Uncharacterized protein {ECO:0000313|EMBL:EMT04270.1, ECO:0000313|EnsemblPlants:EMT04270};	--	GO:0005634,nucleus; GO:0045892,negative regulation of DNA-templated transcription; GO:0006139,nucleobase-containing compound metabolic process; GO:0006351,DNA-templated transcription; GO:0006355,regulation of DNA-templated transcription; GO:0006725,cellular aromatic compound metabolic process; GO:0006807,nitrogen compound metabolic process; GO:0008150,biological_process; GO:0008152,metabolic proc…	--	--	--	--
Cluster-83803.0	6.08	4.8	5.23	94.76	88.91	87.84	67	58	57	986	1083	894	4.08995	8.61091e-209	1.09151e-206	up	749	--	--	hypothetical protein ZWY2020_017963 [Hordeum vulgare]	DHR15_WHEAT RecName: Full=Dehydrin Rab15;	A1IVM0_TRITD SubName: Full=Dehydrin 1 {ECO:0000313|EMBL:CAJ56059.1};	--	GO:0009631,cold acclimation; GO:0009737,response to abscisic acid; GO:0009414,response to water deprivation; GO:0006950,response to stress; GO:0008150,biological_process; GO:0009266,response to temperature stimulus; GO:0009409,response to cold; GO:0009628,response to abiotic stimulus; GO:0050896,response to stimulus; GO:0009719,response to endogenous stimulus; GO:0009725,response to hormone; GO:0…	--	--	--	--
Cluster-132915.0	6.58	7.07	7.91	40.4	40.19	38.66	214	253	253	1249	1456	1181	2.49665	1.24902e-208	1.57959e-206	up	1608	K16190 glucuronokinase [EC:2.7.1.43] | (RefSeq) probable glucuronokinase 2 (A)	ko00040: Pentose and glucuronate interconversions; ko00053: Ascorbate and aldarate metabolism; ko00520: Amino sugar and nucleotide sugar metabolism; ko01100: Metabolic pathways; ko01250: Biosynthesis of nucleotide sugars	glucuronokinase 1-like [Hordeum vulgare]	GLAK2_ARATH RecName: Full=Probable glucuronokinase 2; EC=2.7.1.43;	A0A453N1Q5_AEGTS SubName: Full=Uncharacterized protein {ECO:0000313|EnsemblPlants:AET6Gv20179700.4};	--	GO:0005829,cytosol; GO:0005524,ATP binding; GO:0047940,glucuronokinase activity; GO:0046872,metal ion binding; GO:0004496,mevalonate kinase activity; GO:0005975,carbohydrate metabolic process; GO:0008299,isoprenoid biosynthetic process; GO:0016310,phosphorylation; GO:0000166,nucleotide binding; GO:0003674,molecular_function; GO:0005488,binding; GO:0017076,purine nucleotide binding; GO:0030554,ade…	GHMP kinases N terminal domain	--	--	--
Cluster-95756.0	9.91	10.91	10	35.67	35.54	33.35	789	956	785	2700	3159	2478	1.78575	2.47402e-208	3.1216e-206	up	3759	K05391 cyclic nucleotide gated channel, plant | (RefSeq) cyclic nucleotide-gated ion channel 2-like (A)	ko04626: Plant-pathogen interaction	unnamed protein product [Triticum turgidum subsp. durum]	CNGC2_ARATH RecName: Full=Cyclic nucleotide-gated ion channel 2; Short=AtCNGC2; AltName: Full=Cyclic nucleotide- and calmodulin-regulated ion channel 2; AltName: Full=Protein DEFENSE NO DEATH 1;	A0A446UMW4_TRITD RecName: Full=Cyclic nucleotide-binding domain-containing protein {ECO:0000259|PROSITE:PS50042};	K+-channel ERG and related proteins, contain PAS/PAC sensor domain	GO:0016021,integral component of membrane; GO:0005886,plasma membrane; GO:0005262,calcium channel activity; GO:0005516,calmodulin binding; GO:0030552,cAMP binding; GO:0030553,cGMP binding; GO:0005222,intracellular cAMP-activated cation channel activity; GO:0005221,intracellular cyclic nucleotide activated cation channel activity; GO:0005242,inward rectifier potassium channel activity; GO:0070509,…	Cyclic nucleotide-binding domain	--	--	--
Cluster-114177.3	47.09	52.84	46.69	157.89	167.46	170.29	918	1141	930	3032	3678	3180	1.79425	3.72114e-208	4.68436e-206	up	1372	--	--	uncharacterized protein LOC109782392 [Aegilops tauschii subsp. strangulata]	--	A0A453DHY5_AEGTS SubName: Full=Uncharacterized protein {ECO:0000313|EnsemblPlants:AET2Gv21248200.2};	--	--	--	--	--	--
Cluster-74669.0	304.69	305.23	297.96	99.88	110.65	107.46	5582	6117	5361	1727	2241	1829	-1.49433	2.62327e-207	3.29474e-205	down	1037	K02876 large subunit ribosomal protein L15 | (RefSeq) 50S ribosomal protein L15, chloroplastic-like (A)	ko03010: Ribosome	50S ribosomal protein L15, chloroplastic-like [Triticum dicoccoides]	RK15_PEA RecName: Full=50S ribosomal protein L15, chloroplastic; AltName: Full=CL15; Flags: Precursor; Fragment;	A0A453IM08_AEGTS RecName: Full=Ribosomal_L18e/L15P domain-containing protein {ECO:0000259|Pfam:PF00828};	Mitochondrial/chloroplast ribosomal protein L15/L10	GO:0009507,chloroplast; GO:0015934,large ribosomal subunit; GO:0003729,mRNA binding; GO:0003735,structural constituent of ribosome; GO:0006412,translation; GO:0003674,molecular_function; GO:0003676,nucleic acid binding; GO:0003723,RNA binding; GO:0005488,binding; GO:0097159,organic cyclic compound binding; GO:1901363,heterocyclic compound binding; GO:0005198,structural molecule activity; GO:00065…	Ribosomal proteins 50S-L15, 50S-L18e, 60S-L27A	--	--	--
Cluster-109772.0	20.13	20.21	21.7	65.1	60.01	61.97	1093	1195	1156	3319	3600	3150	1.61487	4.2236e-207	5.29255e-205	up	3375	K18674 N-acetylgalactosamine kinase [EC:2.7.1.157] | (RefSeq) galactokinase-like (A)	ko00520: Amino sugar and nucleotide sugar metabolism; ko01100: Metabolic pathways; ko01250: Biosynthesis of nucleotide sugars	galactokinase isoform X2 [Triticum urartu]	GALK1_ARATH RecName: Full=Galactokinase; EC=2.7.1.6; AltName: Full=Galactose kinase;	T1MF37_TRIUA SubName: Full=Uncharacterized protein {ECO:0000313|EnsemblPlants:TRIUR3_16307-P1};	Galactokinase	GO:0005829,cytosol; GO:0005524,ATP binding; GO:0004335,galactokinase activity; GO:0046872,metal ion binding; GO:0046835,carbohydrate phosphorylation; GO:0006012,galactose metabolic process; GO:0000166,nucleotide binding; GO:0003674,molecular_function; GO:0005488,binding; GO:0017076,purine nucleotide binding; GO:0030554,adenyl nucleotide binding; GO:0032553,ribonucleotide binding; GO:0032555,purin…	Galactokinase galactose-binding signature	--	--	--
Cluster-91285.0	36.9	34.87	34.44	160.81	172.76	169.12	500	487	432	1953	2453	2029	2.24318	5.63894e-207	7.04997e-205	up	1030	--	--	predicted protein [Hordeum vulgare subsp. vulgare]	--	A0A453BPL9_AEGTS SubName: Full=Uncharacterized protein {ECO:0000313|EnsemblPlants:AET2Gv20586000.1};	--	--	--	--	--	--
Cluster-95576.1	192.45	202.19	207.6	84.49	82.37	77.34	6256	7219	6632	2608	2977	2358	-1.27517	6.73661e-207	8.40312e-205	down	1609	--	--	fasciclin-like arabinogalactan protein 12 [Triticum urartu]	FLA12_ARATH RecName: Full=Fasciclin-like arabinogalactan protein 12; Flags: Precursor;	F2D4R6_HORVV SubName: Full=Predicted protein {ECO:0000313|EMBL:BAJ90087.1};	--	GO:0031225,anchored component of membrane; GO:0005886,plasma membrane; GO:0009834,plant-type secondary cell wall biogenesis; GO:0008150,biological_process; GO:0009832,plant-type cell wall biogenesis; GO:0009987,cellular process; GO:0042546,cell wall biogenesis; GO:0044085,cellular component biogenesis; GO:0071554,cell wall organization or biogenesis; GO:0071669,plant-type cell wall organization o…	Fasciclin domain	--	--	--
[truncated: 25,701 more rows]
