# Supplementary material for: Integrated transcriptomic, proteomic and metabolomic analyses revealing the roles of amino acid and sucrose metabolism in augmenting drought tolerance in Agropyron mongolicum
Source: Front Plant Sci. 2024 Dec 16;15:1515944. doi: 10.3389/fpls.2024.1515944 (PMC11685866; doi:10.3389/fpls.2024.1515944)
Supplement: Supplementary file 8 [file Table7.xlsx]

## Sheet: Sheet1
Accession	Description	Gene	shoot-CK-1	shoot-CK-2	shoot-CK-3	shoot-D-24h-1	shoot-D-24h-2	shoot-D-24h-3	FC	P-value	FDR	Regulation	Biological process	Cellular component	Molecular function	KOG	K	KEGG_Pathways	IPRs	Subcellular_localization	signalP
Isoform0000005|m.2	type:dumb-complete len:2583 strand:+ pos:32-7780	--	0	0	0	0.039637	0	0	inf	0	0	up	--	--	--	I: Lipid transport and metabolism	--	--	IPR015255: Vitellinogen, open beta-sheet;IPR015819: Lipid transport protein, beta-sheet shell;IPR001747: Vitellogenin, N-terminal;IPR015816: Vitellinogen, beta-sheet N-terminal;IPR011030: Lipovitellin-phosvitin complex, superhelical domain	Cytoplasm	CS pos: 17-18. TRA-VP. Pr: 0.8563
Isoform0000021	pos:291-6614	--	0.575255	0.670633	0.626986	0.378048	0.379396	0.381109	0.607917	0.00779216	0.0581135	down	GO:0051211 anisotropic cell growth;GO:2001006 regulation of cellulose biosynthetic process	GO:0010330 cellulose synthase complex	GO:0008017 microtubule binding	S: Function unknown	--	--	IPR011989: Armadillo-like helical;IPR044297: Protein CELLULOSE SYNTHASE INTERACTIVE 1/2/3;IPR016024: Armadillo-type fold;IPR000008: C2 domain;IPR035892: C2 domain superfamily;IPR000225: Armadillo	Plasma membrane	--
Isoform0000047	pos:2-6247	--	2.40262	2.43195	2.35362	1.26554	1.2215	1.2401	0.518509	1.31328e-06	0.00101507	down	GO:0051211 anisotropic cell growth;GO:2001006 regulation of cellulose biosynthetic process	GO:0010330 cellulose synthase complex	GO:0008017 microtubule binding	S: Function unknown	--	--	IPR016024: Armadillo-type fold;IPR035892: C2 domain superfamily;IPR011989: Armadillo-like helical;IPR000008: C2 domain;IPR000225: Armadillo;IPR044297: Protein CELLULOSE SYNTHASE INTERACTIVE 1/2/3	Plasma membrane	--
Isoform0000134	pos:605-5356	--	0	3.38343	0	0	0	0	0	0	0	down	GO:0006468 protein phosphorylation;GO:0006952 defense response;GO:0051707 response to other organism	GO:0016021 integral component of membrane	GO:0004672 protein kinase activity;GO:0005524 ATP binding;GO:0043531 ADP binding	T: Signal transduction mechanisms	K13415	ko04075: Plant hormone signal transduction	IPR036388: Winged helix-like DNA-binding domain superfamily;IPR002182: NB-ARC;IPR000719: Protein kinase domain;IPR042197: Apoptotic protease-activating factors, helical domain;IPR017441: Protein kinase, ATP binding site;IPR027417: P-loop containing nucleoside triphosphate hydrolase;IPR032675: Leucine-rich repeat domain superfamily;IPR011009: Protein kinase-like domain superfamily;IPR008271: Serin…	Nucleus	--
Isoform0000175	pos:968-3814	--	0.0491783	0.0334455	0	0	0	0	0	0	0	down	GO:0006281 DNA repair	GO:0005634 nucleus	GO:0005524 ATP binding;GO:0008094 ATP-dependent activity, acting on DNA;GO:0046872 metal ion binding;GO:0140658 ATP-dependent chromatin remodeler activity	K: Transcription;L: Replication, recombination and repair	K15711	--	IPR001650: Helicase, C-terminal;IPR014001: Helicase superfamily 1/2, ATP-binding domain;IPR001841: Zinc finger, RING-type;IPR027417: P-loop containing nucleoside triphosphate hydrolase;IPR038718: SNF2-like, N-terminal domain superfamily;IPR017907: Zinc finger, RING-type, conserved site;IPR000330: SNF2, N-terminal;IPR013083: Zinc finger, RING/FYVE/PHD-type	Nucleus	--
Isoform0000236	pos:765-4205	--	0	0	0	0	0.0386307	0	inf	0	0	up	GO:0006952 defense response;GO:0051707 response to other organism	GO:0005634 nucleus	GO:0004518 nuclease activity;GO:0043531 ADP binding;GO:0046872 metal ion binding	T: Signal transduction mechanisms	K13457	ko04626: Plant-pathogen interaction	IPR041118: Rx, N-terminal;IPR038005: Virus X resistance protein-like, coiled-coil domain;IPR032675: Leucine-rich repeat domain superfamily;IPR044974: Disease resistance protein, plants;IPR027417: P-loop containing nucleoside triphosphate hydrolase;IPR036388: Winged helix-like DNA-binding domain superfamily;IPR002182: NB-ARC;IPR042197: Apoptotic protease-activating factors, helical domain	Cytoplasm	--
Isoform0000240	pos:4447-4989	--	0.170321	0.144725	0.207256	0.283215	0.334531	0.268431	1.69667	0.0173745	0.0905948	up	--	GO:0016021 integral component of membrane	--	S: Function unknown	K23544	--	IPR005016: Serine incorporator/TMS membrane protein	Extracell	--
Isoform0000264	pos:4-4701	--	4.01361	3.47275	2.74823	1.95013	1.78131	2.11001	0.570755	0.0235876	0.108639	down	GO:0000398 mRNA splicing, via spliceosome	GO:0005681 spliceosomal complex	GO:0017070 U6 snRNA binding;GO:0030623 U5 snRNA binding;GO:0070122 isopeptidase activity;GO:0140492 metal-dependent deubiquitinase activity	A: RNA processing and modification	K12856	ko03040: Spliceosome	IPR021983: PRP8 domain IV core;IPR000555: JAB1/MPN/MOV34 metalloenzyme domain;IPR012984: PROCT domain;IPR019580: Pre-mRNA-processing-splicing factor 8, U6-snRNA-binding;IPR012337: Ribonuclease H-like superfamily;IPR037518: MPN domain;IPR012592: PROCN domain;IPR043173: Prp8 RNase domain IV, fingers region;IPR027652: Pre-mRNA-processing-splicing factor 8	Plasma membrane	--
Isoform0000286	pos:1076-3655	--	0	0	0	0.0179929	0	0	inf	0	0	up	GO:0006952 defense response	--	GO:0043531 ADP binding	T: Signal transduction mechanisms	K20599	ko04016: MAPK signaling pathway - plant	IPR032675: Leucine-rich repeat domain superfamily;IPR042197: Apoptotic protease-activating factors, helical domain;IPR027417: P-loop containing nucleoside triphosphate hydrolase;IPR002182: NB-ARC;IPR003591: Leucine-rich repeat, typical subtype;IPR036388: Winged helix-like DNA-binding domain superfamily;IPR001611: Leucine-rich repeat	Nucleus	--
Isoform0000361	pos:331-4518	--	0	0	0.180087	0	0	0	0	0	0	down	--	--	--	L: Replication, recombination and repair	K13457	ko04626: Plant-pathogen interaction	IPR036388: Winged helix-like DNA-binding domain superfamily;IPR002182: NB-ARC;IPR038005: Virus X resistance protein-like, coiled-coil domain;IPR041118: Rx, N-terminal;IPR027417: P-loop containing nucleoside triphosphate hydrolase;IPR042197: Apoptotic protease-activating factors, helical domain;IPR032675: Leucine-rich repeat domain superfamily;IPR027806: Harbinger transposase-derived nuclease doma…	Nucleus	--
Isoform0000450	pos:110-3382	--	0	0	0	0	0.170378	0	inf	0	0	up	GO:0006085 acetyl-CoA biosynthetic process;GO:0006101 citrate metabolic process;GO:0006629 lipid metabolic process	GO:0005829 cytosol	GO:0003878 ATP citrate synthase activity;GO:0005524 ATP binding;GO:0046872 metal ion binding	C: Energy production and conversion	K01648	ko00020: Citrate cycle (TCA cycle);ko01100: Metabolic pathways;ko01110: Biosynthesis of secondary metabolites	IPR016102: Succinyl-CoA synthetase-like;IPR036291: NAD(P)-binding domain superfamily;IPR002020: Citrate synthase;IPR013650: ATP-grasp fold, succinyl-CoA synthetase-type;IPR036969: Citrate synthase superfamily;IPR016142: Citrate synthase-like, large alpha subdomain;IPR005811: ATP-citrate lyase/succinyl-CoA ligase;IPR017866: Succinyl-CoA synthetase, beta subunit, conserved site;IPR003781: CoA-bindi…	Cytoplasm	--
Isoform0000523	pos:1-4443	--	4.03443	3.81399	3.75379	1.96322	1.99011	2.1503	0.526075	8.82468e-05	0.00680028	down	GO:0006996 organelle organization;GO:0051640 organelle localization	GO:0005737 cytoplasm	--	R: General function prediction only	K03255	--	IPR011990: Tetratricopeptide-like helical domain superfamily;IPR027523: CLU domain containing protein;IPR019734: Tetratricopeptide repeat;IPR025697: CLU domain;IPR033646: CLU central domain	Nucleus	--
Isoform0000551	pos:205-4332	--	5.01209	4.75448	4.63867	2.09994	2.02316	2.23799	0.441582	4.1106e-05	0.00496734	down	--	--	--	--	K03403	ko00860: Porphyrin metabolism;ko01100: Metabolic pathways;ko01110: Biosynthesis of secondary metabolites	IPR003672: CobN/magnesium chelatase;IPR011771: Magnesium-chelatase, subunit H;IPR022571: Magnesium chelatase, subunit H, N-terminal	chloroplast	--
Isoform0000585	pos:173-4447	--	0.780133	0.716708	0.800176	0.566998	0.459795	0.427544	0.633142	0.0204367	0.0994825	down	GO:0000226 microtubule cytoskeleton organization	GO:0005881 cytoplasmic microtubule	GO:0008017 microtubule binding	R: General function prediction only	K16578	--	IPR021133: HEAT, type 2;IPR024395: CLASP N-terminal domain;IPR016024: Armadillo-type fold;IPR034085: TOG domain;IPR011989: Armadillo-like helical;IPR000357: HEAT repeat	Nucleus	--
Isoform0000636	pos:166-4272	--	1.2768	1.3174	1.35045	2.20437	2.03971	1.90562	1.559	0.00411177	0.0421366	up	--	--	--	F: Nucleotide transport and metabolism	K00106	ko00230: Purine metabolism;ko00232: Caffeine metabolism;ko01100: Metabolic pathways;ko01110: Biosynthesis of secondary metabolites;ko01232: Nucleotide metabolism;ko04146: Peroxisome	IPR000674: Aldehyde oxidase/xanthine dehydrogenase, a/b hammerhead;IPR001041: 2Fe-2S ferredoxin-type iron-sulfur binding domain;IPR036884: [2Fe-2S]-binding domain superfamily;IPR046867: Aldehyde oxidase/xanthine dehydrogenase, second molybdopterin binding domain;IPR005107: CO dehydrogenase flavoprotein, C-terminal;IPR006058: 2Fe-2S ferredoxin, iron-sulphur binding site;IPR016169: FAD-binding, typ…	Plasma membrane	--
Isoform0000651	pos:530-3142	--	0.235934	0.294172	0.25599	0.449965	0.401839	0.378295	1.56482	0.00629284	0.0518177	up	--	--	--	F: Nucleotide transport and metabolism	K00106	ko00230: Purine metabolism;ko00232: Caffeine metabolism;ko01100: Metabolic pathways;ko01110: Biosynthesis of secondary metabolites;ko01232: Nucleotide metabolism;ko04146: Peroxisome	IPR036318: FAD-binding, type PCMH-like superfamily;IPR000674: Aldehyde oxidase/xanthine dehydrogenase, a/b hammerhead;IPR002888: [2Fe-2S]-binding;IPR005107: CO dehydrogenase flavoprotein, C-terminal;IPR036884: [2Fe-2S]-binding domain superfamily;IPR002346: Molybdopterin dehydrogenase, FAD-binding;IPR016166: FAD-binding domain, PCMH-type;IPR036683: CO dehydrogenase flavoprotein, C-terminal domain …	Extracell	--
Isoform0000681	pos:135-4238	--	0.734176	0.654008	0.621116	0.421124	0.390248	0.421234	0.61345	0.00318265	0.0367387	down	--	--	--	Q: Secondary metabolites biosynthesis, transport and catabolism	K05658	ko02010: ABC transporters	IPR003439: ABC transporter-like, ATP-binding domain;IPR011527: ABC transporter type 1, transmembrane domain;IPR036640: ABC transporter type 1, transmembrane domain superfamily;IPR027417: P-loop containing nucleoside triphosphate hydrolase;IPR017871: ABC transporter-like, conserved site;IPR003593: AAA+ ATPase domain	Plasma membrane	--
Isoform0000763	pos:785-3898	--	0.516628	0.424286	0.454971	0.208766	0.259372	0.207905	0.484312	0.00179271	0.0263612	down	--	--	--	Z: Cytoskeleton	K10398	ko04814: Motor proteins	IPR001752: Kinesin motor domain;IPR027417: P-loop containing nucleoside triphosphate hydrolase;IPR019821: Kinesin motor domain, conserved site;IPR036961: Kinesin motor domain superfamily	Cytoplasm	--
Isoform0000811	pos:310-4104	--	0.112341	0.159928	0.133163	0.0947807	0.0792859	0.0642933	0.587915	0.0248613	0.111998	down	--	--	--	--	--	--	--	Nucleus	--
Isoform0000874	pos:280-4083	--	1.24815	1.18163	1.31759	0.746417	0.774514	0.6969	0.591836	0.000286919	0.0116253	down	--	--	--	--	--	--	--	Nucleus	--
Isoform0001022	pos:145-3702	--	0.109236	0	0	0	0	0	0	0	0	down	GO:0006952 defense response;GO:0051707 response to other organism	--	GO:0043531 ADP binding	T: Signal transduction mechanisms	K13457	ko04626: Plant-pathogen interaction	IPR036388: Winged helix-like DNA-binding domain superfamily;IPR044974: Disease resistance protein, plants;IPR027417: P-loop containing nucleoside triphosphate hydrolase;IPR042197: Apoptotic protease-activating factors, helical domain;IPR032675: Leucine-rich repeat domain superfamily;IPR038005: Virus X resistance protein-like, coiled-coil domain;IPR041118: Rx, N-terminal;IPR002182: NB-ARC	chloroplast	--
Isoform0001142	pos:59-2605	--	0.219863	0.251289	0.289925	0.171844	0.185549	0.134925	0.64687	0.0260415	0.114396	down	--	--	--	T: Signal transduction mechanisms	K05285	ko00563: Glycosylphosphatidylinositol (GPI)-anchor biosynthesis;ko01100: Metabolic pathways	IPR037671: GPI ethanolamine phosphate transferase 1, N-terminal;IPR017852: GPI ethanolamine phosphate transferase 1, C-terminal;IPR017850: Alkaline-phosphatase-like, core domain superfamily;IPR007070: GPI ethanolamine phosphate transferase 1	Plasma membrane	--
Isoform0001143	pos:2-2758	--	0.201827	0.211195	0.180549	0.123801	0.110605	0.117541	0.592934	0.0013007	0.0230315	down	GO:0006325 chromatin organization;GO:0006355 regulation of transcription, DNA-templated	GO:0005634 nucleus	GO:0003677 DNA binding;GO:0003682 chromatin binding;GO:0046872 metal ion binding	R: General function prediction only	--	--	IPR019786: Zinc finger, PHD-type, conserved site;IPR013083: Zinc finger, RING/FYVE/PHD-type;IPR001356: Homeobox domain;IPR019787: Zinc finger, PHD-finger;IPR011011: Zinc finger, FYVE/PHD-type;IPR001965: Zinc finger, PHD-type;IPR045876: Pathogenesis-related homeodomain protein, PHD finger;IPR009057: Homeobox-like domain superfamily	chloroplast	--
Isoform0001146	pos:3-3875	--	0.189065	0.177805	0.184643	0.115033	0.104989	0.1048	0.588964	0.000448784	0.0149335	down	GO:0006357 regulation of transcription by RNA polymerase II	GO:0016592 mediator complex	GO:0003712 transcription coregulator activity	I: Lipid transport and metabolism	K15164	--	IPR041285: MID domain of medPIWI;IPR009401: Mediator complex subunit Med13, C-terminal	chloroplast	--
Isoform0001147	pos:1021-3177	--	0.0781309	0	0.102595	0	0	0	0	0	0	down	--	--	--	T: Signal transduction mechanisms	K13457	ko04626: Plant-pathogen interaction	IPR044974: Disease resistance protein, plants;IPR036388: Winged helix-like DNA-binding domain superfamily;IPR002182: NB-ARC;IPR027417: P-loop containing nucleoside triphosphate hydrolase;IPR042197: Apoptotic protease-activating factors, helical domain;IPR032675: Leucine-rich repeat domain superfamily;IPR041118: Rx, N-terminal;IPR038005: Virus X resistance protein-like, coiled-coil domain	Cytoplasm	--
Isoform0001187	pos:501-3620	--	0.637387	0.637827	0.656342	0.394415	0.348268	0.341686	0.561397	0.00444067	0.0438843	down	--	--	--	--	--	--	IPR008587: Filament-like plant protein	Nucleus	--
Isoform0001266	pos:294-3566	--	0.799839	0.89312	0.850456	0.330618	0.301589	0.264285	0.352476	0.000842051	0.0188419	down	GO:0009833 plant-type primary cell wall biogenesis;GO:0030244 cellulose biosynthetic process;GO:0071555 cell wall organization	GO:0005886 plasma membrane;GO:0016021 integral component of membrane	GO:0016759 cellulose synthase activity;GO:0016760 cellulose synthase (UDP-forming) activity;GO:0046872 metal ion binding	--	K10999	--	IPR013083: Zinc finger, RING/FYVE/PHD-type;IPR029044: Nucleotide-diphospho-sugar transferases;IPR027934: Cellulose synthase, RING-type zinc finger;IPR005150: Cellulose synthase	Plasma membrane	--
Isoform0001513	pos:432-3668	--	1.71907	1.65969	1.85996	0.654813	0.506586	0.526325	0.322164	0.00163141	0.0253906	down	GO:0030244 cellulose biosynthetic process;GO:0071555 cell wall organization;GO:0071669 plant-type cell wall organization or biogenesis	GO:0005886 plasma membrane;GO:0016021 integral component of membrane	GO:0016760 cellulose synthase (UDP-forming) activity;GO:0046872 metal ion binding	--	K10999	--	IPR005150: Cellulose synthase;IPR027934: Cellulose synthase, RING-type zinc finger;IPR029044: Nucleotide-diphospho-sugar transferases;IPR013083: Zinc finger, RING/FYVE/PHD-type	Plasma membrane	--
Isoform0001567	pos:2-3628	--	0	0	0	0	0.0232703	0	inf	0	0	up	--	--	--	B: Chromatin structure and dynamics;K: Transcription	K22748	ko00310: Lysine degradation;ko01100: Metabolic pathways	IPR001214: SET domain;IPR032675: Leucine-rich repeat domain superfamily;IPR036047: F-box-like domain superfamily;IPR045606: Protein SET DOMAIN GROUP 2, C-terminal;IPR046341: SET domain superfamily	Nucleus	--
Isoform0001572	pos:233-2818	--	0	0	0	0.0499384	0.0448444	0.0468425	inf	0	0	up	GO:0006952 defense response;GO:0051707 response to other organism	--	GO:0043531 ADP binding	T: Signal transduction mechanisms	K13457	ko04626: Plant-pathogen interaction	IPR036388: Winged helix-like DNA-binding domain superfamily;IPR002182: NB-ARC;IPR038005: Virus X resistance protein-like, coiled-coil domain;IPR042197: Apoptotic protease-activating factors, helical domain;IPR044974: Disease resistance protein, plants;IPR027417: P-loop containing nucleoside triphosphate hydrolase;IPR041118: Rx, N-terminal;IPR032675: Leucine-rich repeat domain superfamily	Cytoplasm	--
Isoform0001634	pos:437-3637	--	0.0764031	0	0	0	0	0	0	0	0	down	--	--	--	S: Function unknown	K24810	--	IPR009091: Regulator of chromosome condensation 1/beta-lactamase-inhibitor protein II;IPR002110: Ankyrin repeat;IPR000408: Regulator of chromosome condensation, RCC1;IPR011333: SKP1/BTB/POZ domain superfamily;IPR036770: Ankyrin repeat-containing domain superfamily	Nucleus	--
Isoform0001791	pos:694-3600	--	0.101055	0.0372142	0	0	0	0	0	0	0	down	GO:0005992 trehalose biosynthetic process;GO:0070413 trehalose metabolism in response to stress	--	GO:0004805 trehalose-phosphatase activity	G: Carbohydrate transport and metabolism	K16055	ko00500: Starch and sucrose metabolism;ko01100: Metabolic pathways;ko01110: Biosynthesis of secondary metabolites	IPR036412: HAD-like superfamily;IPR001830: Glycosyl transferase, family 20;IPR023214: HAD superfamily;IPR003337: Trehalose-phosphatase	Nucleus	--
Isoform0001806	pos:2-3676	--	0.30514	0.349536	0.297108	1.00356	0.993282	1.13832	3.29399	6.5849e-05	0.00621326	up	--	GO:0016021 integral component of membrane	GO:0005524 ATP binding;GO:0140359 ABC-type transporter activity	Q: Secondary metabolites biosynthesis, transport and catabolism	K08711	ko02010: ABC transporters	IPR027417: P-loop containing nucleoside triphosphate hydrolase;IPR003439: ABC transporter-like, ATP-binding domain;IPR003593: AAA+ ATPase domain;IPR043926: ABC transporter family G domain;IPR013525: ABC-2 type transporter;IPR013581: Plant PDR ABC transporter associated;IPR034003: ATP-binding cassette transporter, PDR-like subfamily G, domain 2	Plasma membrane	--
Isoform0001923	pos:743-3460	--	0.267875	0.381759	0.331082	0.163373	0.152641	0.233891	0.560718	0.0274973	0.118541	down	GO:0006355 regulation of transcription, DNA-templated;GO:0009734 auxin-activated signaling pathway	GO:0005634 nucleus	GO:0003677 DNA binding	--	K14486	ko04075: Plant hormone signal transduction	IPR000270: PB1 domain;IPR003340: B3 DNA binding domain;IPR044835: Auxin response factor;IPR033389: AUX/IAA domain;IPR015300: DNA-binding pseudobarrel domain superfamily;IPR010525: Auxin response factor domain	Nucleus	--
Isoform0002013	pos:469-3615	--	0	0	0	0.347224	0.262703	0.263083	inf	0	0	up	GO:0033512 L-lysine catabolic process to acetyl-CoA via saccharopine	--	GO:0047130 saccharopine dehydrogenase (NADP+, L-lysine-forming) activity;GO:0047131 saccharopine dehydrogenase (NAD+, L-glutamate-forming) activity	E: Amino acid transport and metabolism	K14157	ko00310: Lysine degradation;ko01100: Metabolic pathways;ko01110: Biosynthesis of secondary metabolites	IPR043009: LOR/SDH bifunctional enzyme, conserved domain superfamily;IPR036291: NAD(P)-binding domain superfamily;IPR007886: Alanine dehydrogenase/pyridine nucleotide transhydrogenase, N-terminal;IPR007545: LOR/SDH bifunctional enzyme, conserved domain;IPR032095: Saccharopine dehydrogenase-like, C-terminal;IPR007698: Alanine dehydrogenase/pyridine nucleotide transhydrogenase, NAD(H)-binding domai…	Nucleus	--
Isoform0002054	pos:87-2954	--	0	0	0	0	0.313684	0	inf	0	0	up	GO:0006952 defense response;GO:0051707 response to other organism	--	GO:0043531 ADP binding	T: Signal transduction mechanisms	K13457	ko04626: Plant-pathogen interaction	IPR041118: Rx, N-terminal;IPR032675: Leucine-rich repeat domain superfamily;IPR044974: Disease resistance protein, plants;IPR027417: P-loop containing nucleoside triphosphate hydrolase;IPR036388: Winged helix-like DNA-binding domain superfamily;IPR002182: NB-ARC;IPR038005: Virus X resistance protein-like, coiled-coil domain;IPR042197: Apoptotic protease-activating factors, helical domain	Cytoplasm	--
Isoform0002117	minus-strand pos:2161-2964	--	0.0826139	0	0	0	0	0	0	0	0	down	GO:0006633 fatty acid biosynthetic process	GO:0016021 integral component of membrane	GO:0016747 acyltransferase activity, transferring groups other than amino-acyl groups	--	K15397	ko00062: Fatty acid elongation;ko01100: Metabolic pathways;ko01110: Biosynthesis of secondary metabolites;ko04626: Plant-pathogen interaction	IPR016039: Thiolase-like;IPR012392: Very-long-chain 3-ketoacyl-CoA synthase;IPR013601: FAE1/Type III polyketide synthase-like protein;IPR013747: Beta-ketoacyl-[acyl-carrier-protein] synthase III, C-terminal	chloroplast	--
Isoform0002207	pos:1-3333	--	2.49532	2.30159	2.23007	0.608109	0.674586	0.572598	0.264024	5.26473e-05	0.00549447	down	GO:0030244 cellulose biosynthetic process;GO:0071555 cell wall organization;GO:0071669 plant-type cell wall organization or biogenesis	GO:0005886 plasma membrane;GO:0016021 integral component of membrane	GO:0016760 cellulose synthase (UDP-forming) activity;GO:0046872 metal ion binding	--	K10999	--	IPR027934: Cellulose synthase, RING-type zinc finger;IPR029044: Nucleotide-diphospho-sugar transferases;IPR005150: Cellulose synthase;IPR013083: Zinc finger, RING/FYVE/PHD-type	Plasma membrane	--
Isoform0002335	pos:293-3370	--	0.329781	0.336904	0.279866	1.46836	1.53479	1.50851	4.76641	0.000891964	0.0191082	up	--	--	--	U: Intracellular trafficking, secretion, and vesicular transport	K08518	--	IPR015943: WD40/YVTN repeat-like-containing domain superfamily;IPR013905: Lethal giant larvae (Lgl)-like, C-terminal domain;IPR001680: WD40 repeat;IPR036322: WD40-repeat-containing domain superfamily	Nucleus	--
Isoform0002433	pos:137-1039	--	0.403426	0.536521	0.441078	0.211776	0.325276	0.264492	0.580398	0.0263374	0.115402	down	--	--	GO:0016788 hydrolase activity, acting on ester bonds	--	K01206	ko00511: Other glycan degradation	IPR036514: SGNH hydrolase superfamily;IPR001087: GDSL lipase/esterase	Extracell	CS pos: 29-30. SSA-LS. Pr: 0.4317
Isoform0002540	pos:89-3241	--	0.309253	0.324559	0.374972	0.199267	0.187466	0.188392	0.570116	0.00592547	0.0503942	down	--	--	GO:0046872 metal ion binding	R: General function prediction only	--	--	IPR001876: Zinc finger, RanBP2-type;IPR036443: Zinc finger, RanBP2-type superfamily	chloroplast	--
Isoform0002543	pos:226-3372	--	0.963463	0.984073	0.982002	8.04509	7.79596	7.77021	8.05972	1.52694e-07	0.00101507	up	GO:0033512 L-lysine catabolic process to acetyl-CoA via saccharopine	--	GO:0047130 saccharopine dehydrogenase (NADP+, L-lysine-forming) activity;GO:0047131 saccharopine dehydrogenase (NAD+, L-glutamate-forming) activity	E: Amino acid transport and metabolism	K14157	ko00310: Lysine degradation;ko01100: Metabolic pathways;ko01110: Biosynthesis of secondary metabolites	IPR007886: Alanine dehydrogenase/pyridine nucleotide transhydrogenase, N-terminal;IPR007545: LOR/SDH bifunctional enzyme, conserved domain;IPR032095: Saccharopine dehydrogenase-like, C-terminal;IPR043009: LOR/SDH bifunctional enzyme, conserved domain superfamily;IPR007698: Alanine dehydrogenase/pyridine nucleotide transhydrogenase, NAD(H)-binding domain;IPR036291: NAD(P)-binding domain superfamil…	Nucleus	--
Isoform0002703	pos:336-3167	--	2.28174	2.09402	2.32786	0.511813	0.538666	0.591433	0.244929	2.14111e-05	0.00359134	down	GO:0009833 plant-type primary cell wall biogenesis;GO:0030244 cellulose biosynthetic process	GO:0005886 plasma membrane;GO:0016021 integral component of membrane	GO:0016760 cellulose synthase (UDP-forming) activity;GO:0051753 mannan synthase activity	--	K20924	--	IPR029044: Nucleotide-diphospho-sugar transferases;IPR005150: Cellulose synthase	Plasma membrane	--
Isoform0002793	pos:109-3315	--	12.4439	13.8692	13.4365	7.59999	8.73097	9.60565	0.652499	0.0121198	0.0748596	down	GO:0006468 protein phosphorylation	GO:0016021 integral component of membrane	GO:0004672 protein kinase activity;GO:0005524 ATP binding	--	K13428	ko04626: Plant-pathogen interaction	IPR032675: Leucine-rich repeat domain superfamily;IPR000719: Protein kinase domain;IPR013210: Leucine-rich repeat-containing N-terminal, plant-type;IPR001611: Leucine-rich repeat;IPR017441: Protein kinase, ATP binding site;IPR011009: Protein kinase-like domain superfamily;IPR003591: Leucine-rich repeat, typical subtype	Plasma membrane	CS pos: 30-31. VHC-SR. Pr: 0.3913
Isoform0002810	pos:122-3112	--	0.41434	0.48801	0.427417	0.274981	0.271414	0.233779	0.586699	0.00181063	0.0263612	down	GO:0007018 microtubule-based movement	GO:0005874 microtubule	GO:0003777 microtubule motor activity;GO:0005524 ATP binding;GO:0008017 microtubule binding	Z: Cytoskeleton	K11498	ko04814: Motor proteins	IPR001752: Kinesin motor domain;IPR036961: Kinesin motor domain superfamily;IPR019821: Kinesin motor domain, conserved site;IPR027417: P-loop containing nucleoside triphosphate hydrolase	chloroplast	--
Isoform0002819	pos:263-3352	--	0.289385	0.331664	0.291762	0.179536	0.167836	0.232017	0.634731	0.0274583	0.118541	down	--	GO:0016021 integral component of membrane	--	--	--	--	IPR035892: C2 domain superfamily;IPR000008: C2 domain;IPR013583: Phosphoribosyltransferase C-terminal	Endoplasmic reticulum	--
Isoform0002838	pos:67-2493	--	4.16633	4.36334	4.10539	13.3551	13.5641	14.2013	3.25447	1.41468e-06	0.00101507	up	GO:0005985 sucrose metabolic process	--	GO:0016157 sucrose synthase activity	M: Cell wall/membrane/envelope biogenesis	K00695	ko00500: Starch and sucrose metabolism;ko01100: Metabolic pathways;ko01110: Biosynthesis of secondary metabolites	IPR012820: Sucrose synthase, plant/cyanobacteria;IPR000368: Sucrose synthase;IPR001296: Glycosyl transferase, family 1	Cytoplasm	--
Isoform0002868	pos:166-2886	--	0.0670618	0.0672913	0	0.150597	0.101973	0.15041	1.9996	0.0348189	0.134285	up	GO:0019438 aromatic compound biosynthetic process;GO:0032259 methylation	--	GO:0008171 O-methyltransferase activity;GO:0008757 S-adenosylmethionine-dependent methyltransferase activity	B: Chromatin structure and dynamics	K20792	--	IPR019734: Tetratricopeptide repeat;IPR021183: N-terminal acetyltransferase A, auxiliary subunit;IPR011990: Tetratricopeptide-like helical domain superfamily	Cytoplasm	--
Isoform0002946	pos:1-3402	--	4.05381	3.96479	4.28577	2.16981	2.34211	2.38933	0.560878	0.000144335	0.00795344	down	--	--	--	--	K03403	ko00860: Porphyrin metabolism;ko01100: Metabolic pathways;ko01110: Biosynthesis of secondary metabolites	IPR003672: CobN/magnesium chelatase;IPR011771: Magnesium-chelatase, subunit H	Cytoplasm	--
Isoform0003118	pos:385-3261	--	1.32376	1.18464	1.17193	0.832251	0.779028	0.763191	0.645178	0.00136044	0.0235445	down	--	--	GO:0003723 RNA binding	O: Posttranslational modification, protein turnover, chaperones;J: Translation, ribosomal structure and biogenesis	K18757	--	IPR036390: Winged helix DNA-binding domain superfamily;IPR006630: La-type HTH domain;IPR006607: Protein of unknown function DM15;IPR045180: La domain containing protein;IPR036388: Winged helix-like DNA-binding domain superfamily;IPR002344: Lupus La protein	Nucleus	--
Isoform0003137	pos:76-876	--	0.730132	0.545898	0.618245	4.68538	4.20112	4.3715	6.99898	0.000569285	0.0156691	up	GO:0019343 cysteine biosynthetic process via cystathionine;GO:0019346 transsulfuration	GO:0005737 cytoplasm	GO:0004123 cystathionine gamma-lyase activity;GO:0016846 carbon-sulfur lyase activity;GO:0030170 pyridoxal phosphate binding	E: Amino acid transport and metabolism	K01761	ko00270: Cysteine and methionine metabolism;ko00450: Selenocompound metabolism;ko01100: Metabolic pathways	IPR015424: Pyridoxal phosphate-dependent transferase;IPR000277: Cys/Met metabolism, pyridoxal phosphate-dependent enzyme;IPR015421: Pyridoxal phosphate-dependent transferase, major domain	chloroplast	--
Isoform0003140	pos:108-3326	--	0.192273	0.211425	0.158852	0.0980332	0.0513547	0.0661807	0.383199	0.0206664	0.100003	down	GO:0009833 plant-type primary cell wall biogenesis;GO:0030244 cellulose biosynthetic process;GO:0071555 cell wall organization	GO:0005886 plasma membrane;GO:0016021 integral component of membrane	GO:0016759 cellulose synthase activity;GO:0016760 cellulose synthase (UDP-forming) activity;GO:0046872 metal ion binding	--	K10999	--	IPR027934: Cellulose synthase, RING-type zinc finger;IPR029044: Nucleotide-diphospho-sugar transferases;IPR013083: Zinc finger, RING/FYVE/PHD-type;IPR005150: Cellulose synthase	Plasma membrane	--
Isoform0003194	pos:68-3088	--	0	0	0	0.0575874	0	0	inf	0	0	up	GO:0006952 defense response	--	--	T: Signal transduction mechanisms	K13457	ko04626: Plant-pathogen interaction	IPR041118: Rx, N-terminal;IPR038005: Virus X resistance protein-like, coiled-coil domain;IPR027417: P-loop containing nucleoside triphosphate hydrolase;IPR032675: Leucine-rich repeat domain superfamily;IPR036388: Winged helix-like DNA-binding domain superfamily;IPR044974: Disease resistance protein, plants	Cytoplasm	--
Isoform0003298	pos:2-3118	--	0.302587	0.420384	0.352279	0.193728	0.147717	0.201396	0.504851	0.00738884	0.0565493	down	GO:0006468 protein phosphorylation	GO:0016021 integral component of membrane	GO:0004672 protein kinase activity;GO:0005524 ATP binding	--	K00924	--	IPR003591: Leucine-rich repeat, typical subtype;IPR008271: Serine/threonine-protein kinase, active site;IPR032675: Leucine-rich repeat domain superfamily;IPR013210: Leucine-rich repeat-containing N-terminal, plant-type;IPR000719: Protein kinase domain;IPR011009: Protein kinase-like domain superfamily;IPR001611: Leucine-rich repeat	chloroplast	CS pos: 38-39. AAG-GD. Pr: 0.5205
Isoform0003337	pos:45-3302	--	1.74343	1.66455	1.74029	0.976518	0.934204	1.02688	0.5706	0.000294621	0.0117986	down	--	--	--	--	--	--	IPR002885: Pentatricopeptide repeat;IPR033443: Pentacotripeptide-repeat region of PRORP;IPR011990: Tetratricopeptide-like helical domain superfamily	chloroplast	--
Isoform0003352	pos:252-3167	--	0.282694	0.277076	0.302367	0.178333	0.141866	0.161212	0.558394	0.00608904	0.051148	down	GO:0007018 microtubule-based movement	GO:0005874 microtubule	GO:0003777 microtubule motor activity;GO:0005524 ATP binding;GO:0008017 microtubule binding	Z: Cytoskeleton	K10406	ko04814: Motor proteins	IPR001752: Kinesin motor domain;IPR001715: Calponin homology domain;IPR027417: P-loop containing nucleoside triphosphate hydrolase;IPR036872: CH domain superfamily;IPR036961: Kinesin motor domain superfamily	Nucleus	--
Isoform0003355	pos:361-3177	--	0.167445	0.167738	0.183247	0.102091	0.0657554	0.101138	0.518845	0.0385148	0.142018	down	GO:0006468 protein phosphorylation	--	GO:0004672 protein kinase activity;GO:0005524 ATP binding	R: General function prediction only	K08857	--	IPR008271: Serine/threonine-protein kinase, active site;IPR000719: Protein kinase domain;IPR017441: Protein kinase, ATP binding site;IPR011009: Protein kinase-like domain superfamily	Nucleus	--
Isoform0003388	pos:67-3237	--	1.39224	1.32476	1.36188	0.566072	0.609945	0.554388	0.424235	0.000139901	0.00792684	down	GO:0030244 cellulose biosynthetic process;GO:0071555 cell wall organization;GO:0071669 plant-type cell wall organization or biogenesis	GO:0005886 plasma membrane;GO:0016021 integral component of membrane	GO:0016760 cellulose synthase (UDP-forming) activity;GO:0046872 metal ion binding	--	K10999	--	IPR029044: Nucleotide-diphospho-sugar transferases;IPR001841: Zinc finger, RING-type;IPR013083: Zinc finger, RING/FYVE/PHD-type;IPR027934: Cellulose synthase, RING-type zinc finger;IPR005150: Cellulose synthase	Plasma membrane	--
Isoform0003410	pos:348-3248	--	0.438511	0.424724	0.480201	0.309391	0.23087	0.243167	0.583152	0.0155263	0.0849447	down	GO:0006468 protein phosphorylation	GO:0016021 integral component of membrane	GO:0004672 protein kinase activity;GO:0005524 ATP binding	--	K13428	ko04626: Plant-pathogen interaction	IPR000719: Protein kinase domain;IPR008271: Serine/threonine-protein kinase, active site;IPR001611: Leucine-rich repeat;IPR017441: Protein kinase, ATP binding site;IPR013210: Leucine-rich repeat-containing N-terminal, plant-type;IPR011009: Protein kinase-like domain superfamily;IPR032675: Leucine-rich repeat domain superfamily;IPR003591: Leucine-rich repeat, typical subtype	Plasma membrane	CS pos: 24-25. GAG-NV. Pr: 0.4088
Isoform0003420	pos:85-3222	--	1.72459	1.62762	1.60683	0.721973	0.735068	0.781964	0.4515	1.82049e-05	0.00321527	down	GO:0009833 plant-type primary cell wall biogenesis;GO:0030244 cellulose biosynthetic process;GO:0071555 cell wall organization	GO:0005886 plasma membrane;GO:0016021 integral component of membrane	GO:0016759 cellulose synthase activity;GO:0016760 cellulose synthase (UDP-forming) activity;GO:0046872 metal ion binding	--	K10999	--	IPR013083: Zinc finger, RING/FYVE/PHD-type;IPR029044: Nucleotide-diphospho-sugar transferases;IPR005150: Cellulose synthase;IPR027934: Cellulose synthase, RING-type zinc finger	Plasma membrane	--
Isoform0003433	pos:177-3113	--	0	0	0	0	0.0232083	0	inf	0	0	up	--	--	GO:0003723 RNA binding	A: RNA processing and modification	K14573	ko03008: Ribosome biogenesis in eukaryotes	IPR012677: Nucleotide-binding alpha-beta plait domain superfamily;IPR003954: RNA recognition motif domain, eukaryote;IPR000504: RNA recognition motif domain;IPR035979: RNA-binding domain superfamily	Nucleus	--
Isoform0003450	pos:1106-3145	--	3.21149	3.28146	3.24144	10.6776	10.0408	11.1272	3.27145	0.000393612	0.0139753	up	GO:0005975 carbohydrate metabolic process	GO:0005576 extracellular region;GO:0016021 integral component of membrane	GO:0004553 hydrolase activity, hydrolyzing O-glycosyl compounds	--	K05349	ko00460: Cyanoamino acid metabolism;ko00500: Starch and sucrose metabolism;ko00999: Biosynthesis of various plant secondary metabolites;ko01100: Metabolic pathways;ko01110: Biosynthesis of secondary metabolites	IPR001764: Glycoside hydrolase, family 3, N-terminal;IPR036881: Glycoside hydrolase family 3 C-terminal domain superfamily;IPR017853: Glycoside hydrolase superfamily;IPR002772: Glycoside hydrolase family 3 C-terminal domain;IPR036962: Glycoside hydrolase, family 3, N-terminal domain superfamily	vacuolar membrane	--
Isoform0003495	pos:100-3048	--	1.56244	1.49191	1.44335	0.63331	0.567378	0.572675	0.394283	7.7492e-05	0.00650933	down	GO:0009833 plant-type primary cell wall biogenesis;GO:0030244 cellulose biosynthetic process	GO:0005886 plasma membrane;GO:0016021 integral component of membrane	GO:0016759 cellulose synthase activity;GO:0016760 cellulose synthase (UDP-forming) activity	--	K10999	--	IPR005150: Cellulose synthase;IPR029044: Nucleotide-diphospho-sugar transferases	Plasma membrane	--
Isoform0003622	pos:40-1260	--	0.186082	0.187037	0.211027	0.134909	0.138943	0.101451	0.642482	0.0320345	0.127973	down	--	--	GO:0004499 N,N-dimethylaniline monooxygenase activity;GO:0050660 flavin adenine dinucleotide binding;GO:0050661 NADP binding	Q: Secondary metabolites biosynthesis, transport and catabolism	K00485	ko00430: Taurine and hypotaurine metabolism;ko01100: Metabolic pathways	IPR000960: Flavin monooxygenase FMO;IPR036188: FAD/NAD(P)-binding domain superfamily;IPR020946: Flavin monooxygenase-like	Nucleus	--
Isoform0003644	pos:25-2451	--	0	0.0570986	0	0	0	0	0	0	0	down	GO:0006882 cellular zinc ion homeostasis	GO:0005774 vacuolar membrane;GO:0016021 integral component of membrane	GO:0005385 zinc ion transmembrane transporter activity	P: Inorganic ion transport and metabolism	K14692	--	IPR045316: Zinc transporter Msc2-like;IPR036837: Cation efflux protein, cytoplasmic domain superfamily;IPR027469: Cation efflux transmembrane domain superfamily;IPR002524: Cation efflux protein	chloroplast	--
Isoform0003662	pos:2-2824	--	0	0	0	0.0144237	0	0	inf	0	0	up	GO:0006886 intracellular protein transport;GO:0016192 vesicle-mediated transport	GO:0071439 clathrin complex	GO:0032051 clathrin light chain binding	U: Intracellular trafficking, secretion, and vesicular transport	K04646	ko04144: Endocytosis	IPR016024: Armadillo-type fold;IPR000547: Clathrin, heavy chain/VPS, 7-fold repeat;IPR011990: Tetratricopeptide-like helical domain superfamily;IPR016341: Clathrin, heavy chain	Cytoplasm	--
Isoform0003812	pos:271-3015	--	0.120952	0.16924	0.149763	0.280714	0.263152	0.335592	1.99897	0.00596032	0.0504978	up	GO:0043436 oxoacid metabolic process	--	GO:0003994 aconitate hydratase activity;GO:0046872 metal ion binding;GO:0047780 citrate dehydratase activity;GO:0051539 4 iron, 4 sulfur cluster binding	A: RNA processing and modification;J: Translation, ribosomal structure and biogenesis	K01681	ko00020: Citrate cycle (TCA cycle);ko00630: Glyoxylate and dicarboxylate metabolism;ko01100: Metabolic pathways;ko01110: Biosynthesis of secondary metabolites;ko01200: Carbon metabolism;ko01210: 2-Oxocarboxylic acid metabolism;ko01230: Biosynthesis of amino acids	IPR015931: Aconitase/3-isopropylmalate dehydratase large subunit, alpha/beta/alpha, subdomain 1/3;IPR006249: Aconitase/Iron-responsive element-binding protein 2;IPR015928: Aconitase/3-isopropylmalate dehydratase, swivel;IPR000573: Aconitase A/isopropylmalate dehydratase small subunit, swivel domain;IPR018136: Aconitase family, 4Fe-4S cluster binding site;IPR001030: Aconitase/3-isopropylmalate deh…	Mitochondrion	--
Isoform0003916	pos:376-3075	--	0.281036	0.311728	0.330755	0.207543	0.196116	0.162407	0.612945	0.00795914	0.0590475	down	--	GO:0016021 integral component of membrane	GO:0004601 peroxidase activity;GO:0005509 calcium ion binding;GO:0016174 NAD(P)H oxidase H2O2-forming activity	P: Inorganic ion transport and metabolism;Q: Secondary metabolites biosynthesis, transport and catabolism	K13447	ko04016: MAPK signaling pathway - plant;ko04626: Plant-pathogen interaction	IPR002048: EF-hand domain;IPR039261: Ferredoxin-NADP reductase (FNR), nucleotide-binding domain;IPR018247: EF-Hand 1, calcium-binding site;IPR011992: EF-hand domain pair;IPR017927: FAD-binding domain, ferredoxin reductase-type;IPR013121: Ferric reductase, NAD binding domain;IPR013112: FAD-binding 8;IPR000778: Cytochrome b245, heavy chain;IPR017938: Riboflavin synthase-like beta-barrel;IPR013623: …	Plasma membrane	--
Isoform0003989	pos:63-2990	--	0.241492	0.197337	0.264584	0.149923	0.129413	0.142117	0.599153	0.0143716	0.0815271	down	--	--	GO:0003723 RNA binding	A: RNA processing and modification	K14573	ko03008: Ribosome biogenesis in eukaryotes	IPR035979: RNA-binding domain superfamily;IPR003954: RNA recognition motif domain, eukaryote;IPR000504: RNA recognition motif domain;IPR012677: Nucleotide-binding alpha-beta plait domain superfamily	Nucleus	--
Isoform0004027	pos:108-3101	--	0.638793	0.5913	0.569697	0.256054	0.347389	0.390774	0.552407	0.0331728	0.130345	down	GO:0006468 protein phosphorylation	GO:0016021 integral component of membrane	GO:0004672 protein kinase activity;GO:0005524 ATP binding	--	K13428	ko04626: Plant-pathogen interaction	IPR032675: Leucine-rich repeat domain superfamily;IPR000719: Protein kinase domain;IPR011009: Protein kinase-like domain superfamily;IPR008271: Serine/threonine-protein kinase, active site;IPR001611: Leucine-rich repeat;IPR017441: Protein kinase, ATP binding site;IPR003591: Leucine-rich repeat, typical subtype;IPR013210: Leucine-rich repeat-containing N-terminal, plant-type	Plasma membrane	CS pos: 28-29. VGN-IH. Pr: 0.2420
Isoform0004045	pos:90-2960	--	0.385297	0.381641	0.48269	0.751113	0.913936	0.842773	2.00686	0.00252423	0.0318117	up	GO:0034220 ion transmembrane transport;GO:0051453 regulation of intracellular pH;GO:0120029 proton export across plasma membrane;GO:1902600 proton transmembrane transport	GO:0005886 plasma membrane;GO:0016021 integral component of membrane	GO:0005524 ATP binding;GO:0008553 P-type proton-exporting transporter activity;GO:0015662 P-type ion transporter activity;GO:0016887 ATP hydrolysis activity	P: Inorganic ion transport and metabolism	K01535	ko00190: Oxidative phosphorylation;ko01100: Metabolic pathways	IPR006534: P-type ATPase, subfamily IIIA;IPR023298: P-type ATPase, transmembrane domain superfamily;IPR018303: P-type ATPase, phosphorylation site;IPR004014: Cation-transporting P-type ATPase, N-terminal;IPR023299: P-type ATPase, cytoplasmic domain N;IPR044492: P-type ATPase, haloacid dehalogenase domain;IPR008250: P-type ATPase, A domain superfamily;IPR001757: P-type ATPase;IPR036412: HAD-like s…	Plasma membrane	--
Isoform0004066	pos:177-2987	--	0	0	0.0896345	0	0	0	0	0	0	down	--	GO:0005634 nucleus	GO:0003700 DNA-binding transcription factor activity	--	--	--	IPR000270: PB1 domain;IPR003035: RWP-RK domain;IPR045012: Protein NLP;IPR034891: Protein NLP, PB1 domain	Nucleus	--
Isoform0004112	pos:182-3007	--	0.32384	0.230964	0.382951	0.20888	0.187398	0.132878	0.56428	0.0483015	0.162718	down	--	--	--	S: Function unknown	K20798	--	IPR040813: Small RNA 2'-O-methyltransferase Hen1, La-motif C-terminal domain;IPR026610: 3'-RNA ribose 2'-O-methyltransferase, Hen1;IPR029063: S-adenosyl-L-methionine-dependent methyltransferase superfamily;IPR013217: Methyltransferase type 12;IPR040870: HEN1, double-stranded RNA binding domain 2	chloroplast	--
Isoform0004235	pos:3-3122	--	0	0	0	0.0213522	0	0.0501729	inf	0	0	up	--	--	--	L: Replication, recombination and repair	K10728	ko03440: Homologous recombination	IPR036420: BRCT domain superfamily;IPR019787: Zinc finger, PHD-finger;IPR001357: BRCT domain;IPR011011: Zinc finger, FYVE/PHD-type;IPR013083: Zinc finger, RING/FYVE/PHD-type;IPR001965: Zinc finger, PHD-type;IPR044254: BRCT domain-containing protein At4g02110-like	Nucleus	--
Isoform0004266	pos:80-2824	--	0.375386	0	0.341197	0.238109	0.177822	0.19315	0.566652	0.011565	0.0729483	down	--	--	--	--	K04536	--	IPR019775: WD40 repeat, conserved site;IPR001680: WD40 repeat;IPR015943: WD40/YVTN repeat-like-containing domain superfamily;IPR036322: WD40-repeat-containing domain superfamily	chloroplast	--
Isoform0004321	pos:105-2849	--	0.654606	0.752454	0.726079	0.315184	0.376961	0.396684	0.510436	0.00262114	0.0325892	down	GO:0042128 nitrate assimilation	GO:0031090 organelle membrane;GO:0031984 organelle subcompartment	GO:0016491 oxidoreductase activity;GO:0020037 heme binding;GO:0030151 molybdenum ion binding;GO:0043546 molybdopterin cofactor binding	C: Energy production and conversion	K10534	ko00910: Nitrogen metabolism;ko01100: Metabolic pathways	IPR039261: Ferredoxin-NADP reductase (FNR), nucleotide-binding domain;IPR036400: Cytochrome b5-like heme/steroid binding domain superfamily;IPR001709: Flavoprotein pyridine nucleotide cytochrome reductase;IPR005066: Moybdenum cofactor oxidoreductase, dimerisation;IPR014756: Immunoglobulin E-set;IPR000572: Oxidoreductase, molybdopterin-binding domain;IPR001199: Cytochrome b5-like heme/steroid bind…	Cytoplasm	--
Isoform0004448	pos:299-3001	--	0.149033	0.126232	0.15543	0.0922563	0.0794147	0.105367	0.643234	0.0144614	0.0818352	down	GO:0015937 coenzyme A biosynthetic process;GO:0016310 phosphorylation	--	GO:0004594 pantothenate kinase activity;GO:0005524 ATP binding	H: Coenzyme transport and metabolism	K24265	--	IPR036075: Damage-control phosphatase ARMT1-like, metal-binding domain superfamily;IPR004567: Type II pantothenate kinase;IPR035073: At2g17340, three-helix bundle domain;IPR043129: ATPase, nucleotide binding domain;IPR015844: Pantothenate kinase, acetyl-CoA regulated, two-domain type;IPR002791: Damage-control phosphatase ARMT1-like, metal-binding domain	Cytoplasm	--
Isoform0004495	pos:75-2819	--	5.73061	5.89966	5.69079	2.44924	2.55259	2.47119	0.431442	1.1251e-06	0.00101507	down	GO:0009067 aspartate family amino acid biosynthetic process;GO:0009086 methionine biosynthetic process;GO:0009088 threonine biosynthetic process;GO:0009089 lysine biosynthetic process via diaminopimelate;GO:0009090 homoserine biosynthetic process;GO:0016310 phosphorylation	--	GO:0004072 aspartate kinase activity;GO:0004412 homoserine dehydrogenase activity;GO:0005524 ATP binding;GO:0050661 NADP binding	--	K12524	ko00260: Glycine, serine and threonine metabolism;ko00261: Monobactam biosynthesis;ko00270: Cysteine and methionine metabolism;ko00300: Lysine biosynthesis;ko01100: Metabolic pathways;ko01110: Biosynthesis of secondary metabolites;ko01230: Biosynthesis of amino acids	IPR002912: ACT domain;IPR005106: Aspartate/homoserine dehydrogenase, NAD-binding;IPR036393: Acetylglutamate kinase-like superfamily;IPR041743: Bifunctional aspartokinase/homoserine dehydrogenase, N-terminal catalytic domain;IPR036291: NAD(P)-binding domain superfamily;IPR001048: Aspartate/glutamate/uridylate kinase;IPR018042: Aspartate kinase, conserved site;IPR001342: Homoserine dehydrogenase, c…	chloroplast	--
Isoform0004717	pos:1196-3061	--	0	0	0	0.058285	0.0453152	0.0617289	inf	0	0	up	GO:0006952 defense response;GO:0009451 RNA modification;GO:0051707 response to other organism	GO:0043231 intracellular membrane-bounded organelle	GO:0003723 RNA binding;GO:0043531 ADP binding	T: Signal transduction mechanisms	K13457	ko04626: Plant-pathogen interaction	IPR002182: NB-ARC;IPR027417: P-loop containing nucleoside triphosphate hydrolase;IPR036388: Winged helix-like DNA-binding domain superfamily;IPR044974: Disease resistance protein, plants;IPR032675: Leucine-rich repeat domain superfamily;IPR042197: Apoptotic protease-activating factors, helical domain	Mitochondrion	--
Isoform0004770	pos:1097-2959	--	0.708825	0.729793	0.562061	0.413728	0.420781	0.437078	0.635578	0.0286857	0.121443	down	GO:0006952 defense response;GO:0051707 response to other organism	--	GO:0043531 ADP binding	T: Signal transduction mechanisms	--	--	IPR027417: P-loop containing nucleoside triphosphate hydrolase;IPR044974: Disease resistance protein, plants;IPR002182: NB-ARC	Mitochondrion	--
Isoform0004870	pos:457-2592	--	0	0.139036	0	0	0	0	0	0	0	down	--	--	--	K: Transcription	K22184	ko03082: ATP-dependent chromatin remodeling	IPR001487: Bromodomain;IPR037377: Putative transcription factor GTE, bromodomain;IPR027353: NET domain;IPR038336: NET domain superfamily;IPR036427: Bromodomain-like superfamily	chloroplast	--
Isoform0004891	pos:107-2740	--	0.415843	0.329593	0.333376	0.198169	0.273983	0.183867	0.608095	0.0327904	0.129348	down	--	--	--	R: General function prediction only	--	--	IPR036869: Chaperone J-domain superfamily	Nucleus	--
Isoform0004927	pos:486-2996	--	0.0320024	0	0	0	0	0	0	0	0	down	GO:0001682 tRNA 5'-leader removal	GO:0000172 ribonuclease MRP complex;GO:0005655 nucleolar ribonuclease P complex	--	A: RNA processing and modification	K01164	ko03008: Ribosome biogenesis in eukaryotes	IPR012590: POPLD domain;IPR009723: Pop1, N-terminal;IPR039182: Ribonucleases P/MRP protein subunit Pop1	Nucleus	--
Isoform0004970	pos:149-2956	--	1.67452	1.67787	1.74519	2.64614	2.60515	2.56589	1.53351	3.97586e-05	0.00496734	up	GO:0006633 fatty acid biosynthetic process;GO:0031408 oxylipin biosynthetic process;GO:0034440 lipid oxidation	--	GO:0016702 oxidoreductase activity, acting on single donors with incorporation of molecular oxygen, incorporation of two atoms of oxygen;GO:0046872 metal ion binding	--	K00454	ko00591: Linoleic acid metabolism;ko00592: alpha-Linolenic acid metabolism;ko01100: Metabolic pathways;ko01110: Biosynthesis of secondary metabolites	IPR013819: Lipoxygenase, C-terminal;IPR001024: PLAT/LH2 domain;IPR000907: Lipoxygenase;IPR020834: Lipoxygenase, conserved site;IPR036226: Lipoxigenase, C-terminal domain superfamily;IPR001246: Lipoxygenase, plant;IPR036392: PLAT/LH2 domain superfamily;IPR042057: Plant lipoxygenase, PLAT/LH2 domain;IPR027433: Lipoxygenase, domain 3;IPR020833: Lipoxygenase, iron binding site	chloroplast	--
Isoform0005062	pos:3-2048	--	0.296761	0.335788	0.281386	0.14671	0.20609	0.220706	0.627512	0.0473656	0.161025	down	--	--	--	--	--	--	--	Nucleus	--
Isoform0005173	pos:803-2323	--	1.32305	0.902177	0.862452	6.64653	5.19387	5.78801	5.70928	0.00137132	0.0236021	up	GO:0009414 response to water deprivation;GO:0009631 cold acclimation;GO:0009737 response to abscisic acid	--	--	--	--	--	IPR000167: Dehydrin	Nucleus	--
Isoform0005217	pos:317-2647	--	2.45376	2.98318	2.79637	1.34635	1.40113	1.38956	0.502476	0.00528364	0.0479495	down	--	--	--	--	--	--	IPR005049: STELLO-like	Cytoplasm	--
Isoform0005237	pos:311-2797	--	0.871771	0.848195	0.815411	0.496043	0.610193	0.481638	0.626287	0.0185436	0.0937797	down	--	--	--	U: Intracellular trafficking, secretion, and vesicular transport	K20242	--	IPR000195: Rab-GTPase-TBC domain;IPR035969: Rab-GTPase-TBC domain superfamily	Cytoplasm	--
Isoform0005267	pos:182-2647	--	0.282668	0.277405	0.28916	0.591249	0.420574	0.479414	1.75598	0.0291684	0.122433	up	--	--	--	S: Function unknown	K13141	--	IPR011989: Armadillo-like helical;IPR016024: Armadillo-type fold	chloroplast	--
Isoform0005276	pos:2-2623	--	0.819501	0.82404	0.846036	0.492856	0.429177	0.484673	0.565038	0.00412443	0.0421414	down	--	--	--	--	--	--	--	chloroplast	--
Isoform0005298	pos:648-2771	--	0.15974	0.185203	0.182956	0.055197	0.107918	0.0846231	0.469291	0.0493593	0.164882	down	GO:0006527 arginine catabolic process;GO:0008295 spermidine biosynthetic process;GO:0033388 putrescine biosynthetic process from arginine	--	GO:0008792 arginine decarboxylase activity	--	K01583	ko00330: Arginine and proline metabolism;ko01100: Metabolic pathways;ko01110: Biosynthesis of secondary metabolites	IPR002985: Arginine decarboxylase;IPR029066: PLP-binding barrel;IPR022653: Orn/DAP/Arg decarboxylase 2, pyridoxal-phosphate binding site;IPR009006: Alanine racemase/group IV decarboxylase, C-terminal;IPR000183: Ornithine/DAP/Arg decarboxylase;IPR022644: Orn/DAP/Arg decarboxylase 2, N-terminal	Endoplasmic reticulum	--
Isoform0005356	pos:65-412	--	0.13744	0.150464	0.167615	0.799948	0.753947	0.698987	4.94574	5.67224e-05	0.00566237	up	--	--	GO:0019825 oxygen binding;GO:0020037 heme binding;GO:0046872 metal ion binding	C: Energy production and conversion	--	--	IPR000971: Globin;IPR019824: Leghaemoglobin, iron-binding site;IPR012292: Globin/Protoglobin;IPR009050: Globin-like superfamily;IPR001032: Leghaemoglobin	chloroplast	--
Isoform0005387	pos:337-1401	--	0	0	0	0.237897	0.184259	0.217593	inf	0	0	up	--	--	GO:0017018 myosin phosphatase activity;GO:0046872 metal ion binding	T: Signal transduction mechanisms	K14497	ko04016: MAPK signaling pathway - plant;ko04075: Plant hormone signal transduction	IPR000222: PPM-type phosphatase, divalent cation binding;IPR036457: PPM-type phosphatase-like domain superfamily;IPR001932: PPM-type phosphatase-like domain	Nucleus	--
Isoform0005411	pos:102-2789	--	0.345455	0.272352	0.343581	0.167425	0.152263	0.240588	0.582778	0.0375469	0.139915	down	GO:0006809 nitric oxide biosynthetic process;GO:0042128 nitrate assimilation	GO:0031090 organelle membrane;GO:0031984 organelle subcompartment	GO:0020037 heme binding;GO:0030151 molybdenum ion binding;GO:0043546 molybdopterin cofactor binding;GO:0050464 nitrate reductase (NADPH) activity	C: Energy production and conversion	K10534	ko00910: Nitrogen metabolism;ko01100: Metabolic pathways	IPR001709: Flavoprotein pyridine nucleotide cytochrome reductase;IPR036374: Oxidoreductase, molybdopterin-binding domain superfamily;IPR039261: Ferredoxin-NADP reductase (FNR), nucleotide-binding domain;IPR008335: Eukaryotic molybdopterin oxidoreductase;IPR017927: FAD-binding domain, ferredoxin reductase-type;IPR001199: Cytochrome b5-like heme/steroid binding domain;IPR022407: Oxidoreductase, mol…	Peroxisome	--
Isoform0005431	pos:211-2760	--	0.0308897	0.0919555	0	0	0	0	0	0	0	down	GO:0006468 protein phosphorylation	--	GO:0004672 protein kinase activity;GO:0005524 ATP binding	--	K00924	--	IPR017441: Protein kinase, ATP binding site;IPR000535: Major sperm protein (MSP) domain;IPR008962: PapD-like superfamily;IPR036322: WD40-repeat-containing domain superfamily;IPR001680: WD40 repeat;IPR000719: Protein kinase domain;IPR008271: Serine/threonine-protein kinase, active site;IPR001245: Serine-threonine/tyrosine-protein kinase, catalytic domain;IPR013783: Immunoglobulin-like fold;IPR0159…	Nucleus	--
Isoform0005437	pos:169-2715	--	1.73829	1.97928	1.91869	2.94202	2.81325	2.82786	1.52284	0.00420885	0.0424351	up	GO:0005992 trehalose biosynthetic process;GO:0006491 N-glycan processing	--	GO:0004553 hydrolase activity, hydrolyzing O-glycosyl compounds;GO:0004805 trehalose-phosphatase activity;GO:0090599 alpha-glucosidase activity	G: Carbohydrate transport and metabolism	K16055	ko00500: Starch and sucrose metabolism;ko01100: Metabolic pathways;ko01110: Biosynthesis of secondary metabolites	IPR003337: Trehalose-phosphatase;IPR023214: HAD superfamily;IPR001830: Glycosyl transferase, family 20;IPR036412: HAD-like superfamily;IPR006379: HAD-superfamily hydrolase, subfamily IIB	Cytoplasm	--
Isoform0005545	pos:53-2284	--	0	0	0	0.0198361	0.0373484	0	inf	0	0	up	GO:0006508 proteolysis	--	GO:0008236 serine-type peptidase activity	O: Posttranslational modification, protein turnover, chaperones	--	--	IPR011042: Six-bladed beta-propeller, TolB-like;IPR029058: Alpha/Beta hydrolase fold;IPR001375: Peptidase S9, prolyl oligopeptidase, catalytic domain	chloroplast	--
Isoform0005566	pos:275-2683	--	0.320411	0.429041	0.383399	0.232301	0.230409	0.257534	0.63578	0.0215001	0.102274	down	--	--	GO:0003714 transcription corepressor activity	R: General function prediction only	K22382	--	IPR001680: WD40 repeat;IPR044716: Transcriptional corepressor LEUNIG-like;IPR006594: LIS1 homology motif;IPR019775: WD40 repeat, conserved site;IPR015943: WD40/YVTN repeat-like-containing domain superfamily;IPR036322: WD40-repeat-containing domain superfamily	Nucleus	--
Isoform0005595	pos:213-2702	--	0.189424	0.166222	0.198581	0.113591	0.121992	0.0752189	0.560785	0.0456531	0.157703	down	GO:0051013 microtubule severing	GO:0005737 cytoplasm;GO:0005874 microtubule;GO:0008352 katanin complex	GO:0008017 microtubule binding	D: Cell cycle control, cell division, chromosome partitioning	K18643	--	IPR028021: Katanin p80 subunit, C-terminal;IPR001680: WD40 repeat;IPR019775: WD40 repeat, conserved site;IPR015943: WD40/YVTN repeat-like-containing domain superfamily;IPR026962: Katanin p80 WD40 repeat-containing subunit B1;IPR020472: G-protein beta WD-40 repeat;IPR036322: WD40-repeat-containing domain superfamily	Nucleus	--
Isoform0005649	pos:122-2803	--	0.398336	0.431625	0.381425	0.272237	0.253536	0.264309	0.652212	0.00155112	0.0247891	down	--	--	--	--	--	--	--	Nucleus	--
Isoform0005723	pos:273-2888	--	0.162824	0.149117	0.143967	0.0847886	0.095614	0.0974173	0.609377	0.00108321	0.0210174	down	--	--	--	--	K00454	ko00591: Linoleic acid metabolism;ko00592: alpha-Linolenic acid metabolism;ko01100: Metabolic pathways;ko01110: Biosynthesis of secondary metabolites	IPR013819: Lipoxygenase, C-terminal;IPR001024: PLAT/LH2 domain;IPR000907: Lipoxygenase;IPR020834: Lipoxygenase, conserved site;IPR027433: Lipoxygenase, domain 3;IPR036226: Lipoxigenase, C-terminal domain superfamily;IPR001246: Lipoxygenase, plant;IPR036392: PLAT/LH2 domain superfamily;IPR020833: Lipoxygenase, iron binding site	Cytoplasm	--
Isoform0005729	pos:1134-2213	--	0	0.0971845	0.0755397	0.65894	0.660674	0.637797	7.55506	0.0379917	0.140767	up	GO:0009414 response to water deprivation;GO:0009631 cold acclimation;GO:0009737 response to abscisic acid	--	--	--	--	--	IPR000167: Dehydrin	Nucleus	--
Isoform0005932	pos:359-2713	--	0.328258	0.277775	0.276327	0.188743	0.184777	0.158393	0.60283	0.00306861	0.0360078	down	GO:0007018 microtubule-based movement	GO:0005874 microtubule	GO:0003777 microtubule motor activity;GO:0005524 ATP binding;GO:0008017 microtubule binding	Z: Cytoskeleton	K10405	ko04814: Motor proteins	IPR001752: Kinesin motor domain;IPR036961: Kinesin motor domain superfamily;IPR027417: P-loop containing nucleoside triphosphate hydrolase;IPR019821: Kinesin motor domain, conserved site	Nucleus	--
Isoform0005980	pos:262-2613	--	0.737183	0.641691	0.638302	0.392464	0.358515	0.520338	0.630246	0.0368615	0.138639	down	--	GO:0016021 integral component of membrane	GO:0004714 transmembrane receptor protein tyrosine kinase activity;GO:0005524 ATP binding	--	K13436	ko04626: Plant-pathogen interaction	IPR000719: Protein kinase domain;IPR011009: Protein kinase-like domain superfamily;IPR032675: Leucine-rich repeat domain superfamily;IPR001245: Serine-threonine/tyrosine-protein kinase, catalytic domain	Plasma membrane	CS pos: 40-41. SLT-YT. Pr: 0.4018
Isoform0006013	pos:43-2634	--	1.14888	1.08997	1.08896	0.510864	0.454539	0.448868	0.424986	0.000565939	0.0156691	down	--	--	GO:0008168 methyltransferase activity;GO:0016491 oxidoreductase activity;GO:0050660 flavin adenine dinucleotide binding	--	K00574	--	IPR036188: FAD/NAD(P)-binding domain superfamily;IPR026669: Arsenite methyltransferase-like;IPR002937: Amine oxidase;IPR029063: S-adenosyl-L-methionine-dependent methyltransferase superfamily	Cytoplasm	--
Isoform0006047	pos:104-2845	--	7.13268	6.6061	7.1254	3.33436	3.38081	3.4212	0.485827	0.000554494	0.0156691	down	GO:0042128 nitrate assimilation	GO:0031090 organelle membrane;GO:0031984 organelle subcompartment	GO:0016491 oxidoreductase activity;GO:0020037 heme binding;GO:0030151 molybdenum ion binding;GO:0043546 molybdopterin cofactor binding	C: Energy production and conversion	K10534	ko00910: Nitrogen metabolism;ko01100: Metabolic pathways	IPR014756: Immunoglobulin E-set;IPR039261: Ferredoxin-NADP reductase (FNR), nucleotide-binding domain;IPR017927: FAD-binding domain, ferredoxin reductase-type;IPR036400: Cytochrome b5-like heme/steroid binding domain superfamily;IPR001199: Cytochrome b5-like heme/steroid binding domain;IPR001433: Oxidoreductase FAD/NAD(P)-binding;IPR018506: Cytochrome b5, heme-binding site;IPR000572: Oxidoreducta…	Cytoplasm	--
Isoform0006128	pos:239-2683	--	68.0227	73.1801	74.6613	37.8609	36.6219	35.5756	0.509851	0.000121177	0.00752829	down	GO:0005985 sucrose metabolic process	--	GO:0016157 sucrose synthase activity	M: Cell wall/membrane/envelope biogenesis	K00695	ko00500: Starch and sucrose metabolism;ko01100: Metabolic pathways;ko01110: Biosynthesis of secondary metabolites	IPR000368: Sucrose synthase;IPR012820: Sucrose synthase, plant/cyanobacteria;IPR001296: Glycosyl transferase, family 1	Cytoplasm	--
Isoform0006179	pos:112-2709	--	0.232981	0.300889	0.339875	0.426122	0	0.480263	1.55603	0.0405233	0.145879	up	--	GO:0016021 integral component of membrane	GO:0004601 peroxidase activity;GO:0005509 calcium ion binding;GO:0050664 oxidoreductase activity, acting on NAD(P)H, oxygen as acceptor	P: Inorganic ion transport and metabolism;Q: Secondary metabolites biosynthesis, transport and catabolism	K13447	ko04016: MAPK signaling pathway - plant;ko04626: Plant-pathogen interaction	IPR013121: Ferric reductase, NAD binding domain;IPR013623: NADPH oxidase Respiratory burst;IPR039261: Ferredoxin-NADP reductase (FNR), nucleotide-binding domain;IPR013130: Ferric reductase transmembrane component-like domain;IPR017927: FAD-binding domain, ferredoxin reductase-type;IPR011992: EF-hand domain pair;IPR002048: EF-hand domain;IPR000778: Cytochrome b245, heavy chain;IPR018247: EF-Hand 1…	Peroxisome	--
Isoform0006196	pos:244-2625	--	0.16855	0.228629	0.193069	0.117869	0.101542	0.105634	0.550693	0.00972671	0.0658776	down	GO:0007131 reciprocal meiotic recombination	--	--	--	--	--	--	Nucleus	--
Isoform0006243	pos:369-2501	--	0.192678	0.177176	0.301662	0.153054	0.105273	0.107847	0.545295	0.0491612	0.164523	down	GO:0006468 protein phosphorylation	GO:0016021 integral component of membrane	GO:0004672 protein kinase activity;GO:0005524 ATP binding	--	K13417	ko04626: Plant-pathogen interaction	IPR002902: Gnk2-homologous domain;IPR008271: Serine/threonine-protein kinase, active site;IPR000719: Protein kinase domain;IPR038408: Gnk2-homologous domain superfamily;IPR001245: Serine-threonine/tyrosine-protein kinase, catalytic domain;IPR011009: Protein kinase-like domain superfamily	Plasma membrane	CS pos: 34-35. AAA-ET. Pr: 0.8763
Isoform0006274	pos:80-2596	--	0.210639	0.190989	0.210248	0.153802	0.137557	0.108828	0.654033	0.0407214	0.146393	down	GO:0030036 actin cytoskeleton organization	GO:0005856 cytoskeleton	--	--	--	--	IPR028288: SCAR/WAVE family	Nucleus	--
Isoform0006304	pos:56-2566	--	0	0	0	0	0	0.0390822	inf	0	0	up	GO:0005980 glycogen catabolic process	GO:0005737 cytoplasm	GO:0008184 glycogen phosphorylase activity;GO:0030170 pyridoxal phosphate binding;GO:0102250 linear malto-oligosaccharide phosphorylase activity;GO:0102499 SHG alpha-glucan phosphorylase activity	G: Carbohydrate transport and metabolism	K00688	ko00500: Starch and sucrose metabolism;ko01100: Metabolic pathways;ko01110: Biosynthesis of secondary metabolites	IPR000811: Glycosyl transferase, family 35;IPR011833: Glycogen/starch/alpha-glucan phosphorylase;IPR035090: Phosphorylase pyridoxal-phosphate attachment site	Cytoplasm	--
Isoform0006418	pos:2-2530	--	0	0.074834	0.0670386	0.254113	0.317899	0.304537	4.11895	0.000570732	0.0156691	up	--	GO:0000124 SAGA complex	GO:0003712 transcription coregulator activity	--	--	--	IPR046467: PHL domain;IPR021950: Transcription factor Spt20	Nucleus	--
Isoform0006424	pos:314-2674	--	0	0	0	0	0	0.0497733	inf	0	0	up	--	GO:0016021 integral component of membrane	--	--	--	--	IPR038745: AT4G37440-like	Nucleus	--
Isoform0006479	pos:45-2324	--	0.495964	0.564572	0.566415	0.303595	0.257827	0.327645	0.546462	0.00366487	0.0395668	down	--	GO:0005739 mitochondrion;GO:0015935 small ribosomal subunit	GO:0003735 structural constituent of ribosome;GO:0004519 endonuclease activity	R: General function prediction only	--	--	IPR011990: Tetratricopeptide-like helical domain superfamily;IPR002885: Pentatricopeptide repeat;IPR027434: Homing endonuclease;IPR004860: Homing endonuclease, LAGLIDADG	chloroplast	--
Isoform0006507	pos:184-2655	--	1.36908	1.53526	1.50851	0.562085	0.56535	0.574343	0.385642	0.00102782	0.0205803	down	GO:0006260 DNA replication;GO:0009263 deoxyribonucleotide biosynthetic process	GO:0005971 ribonucleoside-diphosphate reductase complex	GO:0004748 ribonucleoside-diphosphate reductase activity, thioredoxin disulfide as acceptor;GO:0005524 ATP binding	F: Nucleotide transport and metabolism	K10807	ko00230: Purine metabolism;ko00240: Pyrimidine metabolism;ko00480: Glutathione metabolism;ko01100: Metabolic pathways;ko01232: Nucleotide metabolism	IPR000788: Ribonucleotide reductase large subunit, C-terminal;IPR005144: ATP-cone domain;IPR008926: Ribonucleotide reductase R1 subunit, N-terminal;IPR013346: Ribonucleotide reductase, class I , alpha subunit;IPR013509: Ribonucleotide reductase large subunit, N-terminal;IPR039718: Ribonucleoside-diphosphate reductase large subunit	Cytoplasm	--
Isoform0006540	pos:164-2674	--	0.496722	0.506995	0.513773	0.283344	0.235792	0.307145	0.544505	0.0147277	0.0824753	down	GO:0000727 double-strand break repair via break-induced replication;GO:0006268 DNA unwinding involved in DNA replication;GO:0006271 DNA strand elongation involved in DNA replication;GO:1902975 mitotic DNA replication initiation	GO:0005634 nucleus;GO:0042555 MCM complex	GO:0003678 DNA helicase activity;GO:0003697 single-stranded DNA binding;GO:0005524 ATP binding;GO:0016787 hydrolase activity	L: Replication, recombination and repair	K02212	ko03030: DNA replication	IPR027417: P-loop containing nucleoside triphosphate hydrolase;IPR036388: Winged helix-like DNA-binding domain superfamily;IPR031327: Mini-chromosome maintenance protein;IPR001208: MCM domain;IPR018525: Mini-chromosome maintenance, conserved site;IPR012340: Nucleic acid-binding, OB-fold;IPR033762: MCM OB domain;IPR008047: Mini-chromosome maintenance complex protein 4;IPR003593: AAA+ ATPase domain…	chloroplast	--
Isoform0006703	pos:56-2356	--	25.7018	26.1145	26.4742	12.0302	12.6119	12.1924	0.470485	9.50325e-06	0.00225719	down	--	--	GO:0003723 RNA binding;GO:0003724 RNA helicase activity;GO:0005524 ATP binding;GO:0008270 zinc ion binding;GO:0016787 hydrolase activity	A: RNA processing and modification	K16911	--	IPR027417: P-loop containing nucleoside triphosphate hydrolase;IPR001878: Zinc finger, CCHC-type;IPR011545: DEAD/DEAH box helicase domain;IPR012562: GUCT;IPR001650: Helicase, C-terminal;IPR014001: Helicase superfamily 1/2, ATP-binding domain;IPR036875: Zinc finger, CCHC-type superfamily	chloroplast	--
Isoform0006719	pos:1521-2696	--	0.234457	0.301698	0.355052	1.07869	0.946541	0.978958	3.37091	0.00546044	0.0481377	up	--	--	GO:0016788 hydrolase activity, acting on ester bonds	--	K01206	ko00511: Other glycan degradation	IPR001087: GDSL lipase/esterase;IPR036514: SGNH hydrolase superfamily;IPR035669: GDSL lipase/esterase-like, plant	chloroplast	CS pos: 29-30. VRS-DD. Pr: 0.9386
Isoform0006723	pos:61-2151	--	0	0	0	0.200688	0.21028	0	inf	0	0	up	GO:0006283 transcription-coupled nucleotide-excision repair;GO:0009411 response to UV	GO:0005694 chromosome	GO:0000993 RNA polymerase II complex binding	S: Function unknown	K23720	ko03420: Nucleotide excision repair	IPR008942: ENTH/VHS;IPR018610: UV-stimulated scaffold protein A	chloroplast	--
Isoform0006724	pos:35-2650	--	1.47546	1.56567	1.37294	0.764251	0.752787	0.667524	0.49491	0.000272522	0.0113367	down	GO:0030244 cellulose biosynthetic process;GO:0071669 plant-type cell wall organization or biogenesis	GO:0016021 integral component of membrane	GO:0016760 cellulose synthase (UDP-forming) activity	--	K20924	--	IPR029044: Nucleotide-diphospho-sugar transferases;IPR005150: Cellulose synthase	Plasma membrane	--
Isoform0006770	pos:162-2495	--	0.279255	0.224136	0.253698	0.116775	0.153049	0.132146	0.530943	0.00371049	0.0398718	down	GO:0000453 enzyme-directed rRNA 2'-O-methylation	GO:0005730 nucleolus	GO:0008649 rRNA methyltransferase activity	A: RNA processing and modification;R: General function prediction only	K14857	--	IPR029063: S-adenosyl-L-methionine-dependent methyltransferase superfamily;IPR002877: Ribosomal RNA methyltransferase, FtsJ domain;IPR012920: Ribosomal RNA methyltransferase, SPB1-like, C-terminal;IPR015507: Ribosomal RNA large subunit methyltransferase E;IPR024576: Ribosomal RNA methyltransferase Spb1, domain of unknown function DUF3381	chloroplast	--
Isoform0006782	pos:177-1979	--	0	0	0	0	0	0.0481398	inf	0	0	up	GO:1902531 regulation of intracellular signal transduction	GO:0005789 endoplasmic reticulum membrane;GO:0016021 integral component of membrane	GO:0000155 phosphorelay sensor kinase activity;GO:0005524 ATP binding;GO:0038199 ethylene receptor activity;GO:0046872 metal ion binding;GO:0051740 ethylene binding	T: Signal transduction mechanisms	K14509	ko04016: MAPK signaling pathway - plant;ko04075: Plant hormone signal transduction	IPR003018: GAF domain;IPR003661: Signal transduction histidine kinase, dimerisation/phosphoacceptor domain;IPR029016: GAF-like domain superfamily;IPR036097: Signal transduction histidine kinase, dimerisation/phosphoacceptor domain superfamily;IPR036890: Histidine kinase/HSP90-like ATPase superfamily;IPR001789: Signal transduction response regulator, receiver domain	chloroplast	--
Isoform0006806	pos:148-2298	--	0.245473	0.22919	0.192604	0.0296057	0.0878336	0.0603911	0.266505	0.0416784	0.148593	down	--	GO:0031969 chloroplast membrane	--	--	--	--	IPR007314: Haem-binding uptake, Tiki superfamily, ChaN;IPR021825: Protein RETICULATA-related	chloroplast	--
Isoform0006813	pos:3-2528	--	0.509941	0.627573	0.551058	1.05678	1.00084	0.974288	1.79554	0.00487632	0.0458184	up	--	GO:0005886 plasma membrane;GO:0016021 integral component of membrane	GO:0000293 ferric-chelate reductase activity;GO:0004601 peroxidase activity;GO:0005509 calcium ion binding;GO:0016174 NAD(P)H oxidase H2O2-forming activity	P: Inorganic ion transport and metabolism;Q: Secondary metabolites biosynthesis, transport and catabolism	K13447	ko04016: MAPK signaling pathway - plant;ko04626: Plant-pathogen interaction	IPR013623: NADPH oxidase Respiratory burst;IPR017927: FAD-binding domain, ferredoxin reductase-type;IPR017938: Riboflavin synthase-like beta-barrel;IPR002048: EF-hand domain;IPR013130: Ferric reductase transmembrane component-like domain;IPR000778: Cytochrome b245, heavy chain;IPR039261: Ferredoxin-NADP reductase (FNR), nucleotide-binding domain;IPR013121: Ferric reductase, NAD binding domain;IPR…	Cytoplasm	--
Isoform0006831	pos:76-2241	--	0.696852	0.759494	0.828988	0.201083	0.264508	0.235012	0.306565	0.000584672	0.0156701	down	GO:0000373 Group II intron splicing	GO:0009507 chloroplast	GO:0003729 mRNA binding	L: Replication, recombination and repair	K01148	ko03018: RNA degradation	IPR035920: YhbY-like superfamily;IPR001890: RNA-binding, CRM domain;IPR045278: Intron splicing facilitator CRS1/CFM2/CFM3	chloroplast	--
Isoform0006912	pos:35-2026	--	4.22333	4.16446	4.32302	1.87057	1.86343	1.79557	0.435029	1.47368e-06	0.00101507	down	GO:0009228 thiamine biosynthetic process	--	GO:0016830 carbon-carbon lyase activity;GO:0046872 metal ion binding;GO:0051539 4 iron, 4 sulfur cluster binding	--	K03147	ko00730: Thiamine metabolism;ko01100: Metabolic pathways;ko01240: Biosynthesis of cofactors	IPR002817: Phosphomethylpyrimidine synthase ThiC/5-hydroxybenzimidazole synthase BzaA/B;IPR038521: ThiC/Bza, core domain;IPR037509: Phosphomethylpyrimidine synthase	chloroplast	--
Isoform0006964	pos:305-2710	--	1.49988	1.62007	1.5299	0.789327	0.808322	0.799943	0.515628	0.000529015	0.0156389	down	--	GO:0016021 integral component of membrane	GO:0008168 methyltransferase activity	--	K23872	--	IPR029063: S-adenosyl-L-methionine-dependent methyltransferase superfamily;IPR004159: Putative S-adenosyl-L-methionine-dependent methyltransferase	chloroplast	--
Isoform0006984	pos:168-2264	--	0.345056	0.397874	0.380537	0.230053	0.284463	0.228061	0.66097	0.0130511	0.0773634	down	GO:0051225 spindle assembly	GO:0070652 HAUS complex	--	--	K16589	--	IPR028163: HAUS augmin-like complex subunit 6, N-terminal;IPR026797: HAUS augmin-like complex subunit 6	chloroplast	--
Isoform0006995	pos:176-2614	--	0.152813	0.146385	0.173134	0.0854935	0.0623389	0.100902	0.526608	0.0316499	0.127377	down	--	GO:0005730 nucleolus	--	J: Translation, ribosomal structure and biogenesis;U: Intracellular trafficking, secretion, and vesicular transport	K14834	--	IPR016903: Nucleolar complex-associated protein 3;IPR016024: Armadillo-type fold;IPR005612: CCAAT-binding factor;IPR011501: Nucleolar complex-associated protein 3, N-terminal	Endoplasmic reticulum	--
Isoform0007001	pos:244-2571	--	0.53426	0.192269	0	0	0	0	0	0	0	down	--	--	--	--	K14494	ko04075: Plant hormone signal transduction	IPR005202: Transcription factor GRAS	Nucleus	--
Isoform0007058	pos:31-2589	--	0.427911	0.556468	0.499889	0.266371	0.287326	0.284782	0.564911	0.0117672	0.0739381	down	GO:0000373 Group II intron splicing	GO:0009507 chloroplast	GO:0003729 mRNA binding	L: Replication, recombination and repair	K01148	ko03018: RNA degradation	IPR001890: RNA-binding, CRM domain;IPR035920: YhbY-like superfamily;IPR045278: Intron splicing facilitator CRS1/CFM2/CFM3	chloroplast	--
Isoform0007091	pos:86-2539	--	0.608729	0.528718	0.545636	0.253986	0.285823	0.280811	0.487569	0.000248823	0.0108897	down	GO:0006270 DNA replication initiation;GO:0007049 cell cycle	GO:0005634 nucleus;GO:0042555 MCM complex	GO:0003677 DNA binding;GO:0003678 DNA helicase activity;GO:0005524 ATP binding;GO:0016887 ATP hydrolysis activity	L: Replication, recombination and repair	K02542	ko03030: DNA replication	IPR018525: Mini-chromosome maintenance, conserved site;IPR041024: Mcm6, C-terminal winged-helix domain;IPR033762: MCM OB domain;IPR041562: MCM, AAA-lid domain;IPR012340: Nucleic acid-binding, OB-fold;IPR031327: Mini-chromosome maintenance protein;IPR027417: P-loop containing nucleoside triphosphate hydrolase;IPR001208: MCM domain;IPR008049: DNA replication licensing factor Mcm6;IPR027925: MCM N-t…	Cytoplasm	--
Isoform0007130	pos:164-2608	--	0	0	0	0	0.0637798	0.105356	inf	0	0	up	GO:0046514 ceramide catabolic process	--	GO:0017040 N-acylsphingosine amidohydrolase activity;GO:0102121 ceramidase activity	T: Signal transduction mechanisms	K12349	ko00600: Sphingolipid metabolism;ko01100: Metabolic pathways	IPR031331: Neutral/alkaline non-lysosomal ceramidase, C-terminal;IPR006823: Neutral/alkaline nonlysosomal ceramidase;IPR038445: Neutral ceramidase, C-terminal domain superfamily;IPR031329: Neutral/alkaline non-lysosomal ceramidase, N-terminal	Plasma membrane	--
Isoform0007135	pos:1-1359	--	5.56784	5.6911	5.88989	2.72933	2.58488	2.50795	0.456133	3.98385e-05	0.00496734	down	GO:0009228 thiamine biosynthetic process;GO:0010266 response to vitamin B1	GO:0009570 chloroplast stroma	GO:0016830 carbon-carbon lyase activity;GO:0019904 protein domain specific binding;GO:0046872 metal ion binding;GO:0051539 4 iron, 4 sulfur cluster binding	--	K03147	ko00730: Thiamine metabolism;ko01100: Metabolic pathways;ko01240: Biosynthesis of cofactors	IPR037509: Phosphomethylpyrimidine synthase;IPR002817: Phosphomethylpyrimidine synthase ThiC/5-hydroxybenzimidazole synthase BzaA/B;IPR038521: ThiC/Bza, core domain	Peroxisome	--
Isoform0007147	pos:36-2534	--	0.137673	0.0763688	0.133488	0.0436563	0.0616686	0.0354579	0.405095	0.024344	0.110901	down	GO:0009451 RNA modification	--	GO:0003723 RNA binding;GO:0008270 zinc ion binding	R: General function prediction only	--	--	IPR002885: Pentatricopeptide repeat;IPR032867: DYW domain;IPR011990: Tetratricopeptide-like helical domain superfamily;IPR046848: E motif;IPR046849: E+ motif	chloroplast	--
Isoform0007223	pos:483-2585	--	0.466103	0.348648	0.398942	0.825964	0.798288	0.742365	1.94993	0.00833166	0.0599045	up	--	GO:0016021 integral component of membrane	GO:0022857 transmembrane transporter activity	R: General function prediction only	--	--	IPR004331: SPX domain;IPR011701: Major facilitator superfamily;IPR036259: MFS transporter superfamily;IPR045264: SPXM, SPX domain	Cytoplasm	--
Isoform0007306	pos:3-2570	--	2.51433	2.31642	2.51796	17.7125	17.2201	17.539	7.14024	6.11601e-05	0.00601327	up	--	--	GO:0005524 ATP binding;GO:0016887 ATP hydrolysis activity	O: Posttranslational modification, protein turnover, chaperones	K03696	--	IPR028299: ClpA/B, conserved site 2;IPR036628: Clp, N-terminal domain superfamily;IPR003593: AAA+ ATPase domain;IPR018368: ClpA/B, conserved site 1;IPR003959: ATPase, AAA-type, core;IPR001270: ClpA/B family;IPR004176: Clp, repeat (R) domain;IPR027417: P-loop containing nucleoside triphosphate hydrolase;IPR019489: Clp ATPase, C-terminal;IPR041546: ClpA/ClpB, AAA lid domain	Plasma membrane	--
Isoform0007324	pos:148-1692	--	0	0	0	0	0.0250141	0	inf	0	0	up	GO:0007049 cell cycle;GO:0015031 protein transport	--	GO:0005524 ATP binding;GO:0016887 ATP hydrolysis activity	O: Posttranslational modification, protein turnover, chaperones	K13525	ko04141: Protein processing in endoplasmic reticulum	IPR003338: CDC48, N-terminal subdomain;IPR027417: P-loop containing nucleoside triphosphate hydrolase;IPR009010: Aspartate decarboxylase-like domain superfamily;IPR029067: CDC48 domain 2-like superfamily;IPR003593: AAA+ ATPase domain;IPR003960: ATPase, AAA-type, conserved site;IPR041569: AAA ATPase, AAA+ lid domain;IPR003959: ATPase, AAA-type, core;IPR004201: CDC48, domain 2	Cytoplasm	--
Isoform0007359	pos:18-2546	--	0.363131	0.332243	0.382293	0.173069	0.155027	0.16651	0.45896	0.000166137	0.00866934	down	--	--	--	S: Function unknown	--	--	IPR000225: Armadillo;IPR016024: Armadillo-type fold;IPR011989: Armadillo-like helical	chloroplast	--
Isoform0007393	pos:339-2240	--	0	0	0	0	0.0391483	0	inf	0	0	up	GO:0061157 mRNA destabilization	GO:0005737 cytoplasm	GO:0003729 mRNA binding	R: General function prediction only	K20102	--	IPR045168: YTH domain containing protein;IPR007275: YTH domain	Nucleus	--
Isoform0007513	pos:515-1891	--	0.436705	0.355561	0.367389	0.269471	0.271763	0.206485	0.644778	0.0197121	0.0976518	down	GO:0001510 RNA methylation;GO:0006396 RNA processing;GO:0042254 ribosome biogenesis	GO:0005730 nucleolus	GO:0003723 RNA binding;GO:0008757 S-adenosylmethionine-dependent methyltransferase activity	A: RNA processing and modification	K14835	--	IPR018314: Bacterial Fmu (Sun)/eukaryotic nucleolar NOL1/Nop2p, conserved site;IPR001678: SAM-dependent methyltransferase RsmB/NOP2-type;IPR023267: RNA (C5-cytosine) methyltransferase;IPR023273: RNA (C5-cytosine) methyltransferase, NOP2;IPR011023: Nop2p;IPR031341: Ribosomal RNA small subunit methyltransferase F, N-terminal;IPR029063: S-adenosyl-L-methionine-dependent methyltransferase superfamily	Cytoplasm	--
Isoform0007534	pos:159-2561	--	0	0.52198	0	0	0	0	0	0	0	down	GO:0006812 cation transport;GO:0006885 regulation of pH	GO:0009941 chloroplast envelope;GO:0012505 endomembrane system;GO:0016021 integral component of membrane	GO:0015299 solute:proton antiporter activity	P: Inorganic ion transport and metabolism	K26731	--	IPR006153: Cation/H+ exchanger;IPR038770: Sodium/solute symporter superfamily	Plasma membrane	--
Isoform0007687	pos:54-2294	--	0.797082	0.900834	0.844553	0.329604	0.343578	0.288435	0.378222	0.000249788	0.0108897	down	--	GO:0016021 integral component of membrane	GO:0016491 oxidoreductase activity	P: Inorganic ion transport and metabolism;Q: Secondary metabolites biosynthesis, transport and catabolism	K00521	--	IPR017927: FAD-binding domain, ferredoxin reductase-type;IPR039261: Ferredoxin-NADP reductase (FNR), nucleotide-binding domain;IPR013112: FAD-binding 8;IPR013130: Ferric reductase transmembrane component-like domain;IPR013121: Ferric reductase, NAD binding domain;IPR017938: Riboflavin synthase-like beta-barrel	Plasma membrane	--
Isoform0007732	pos:105-2471	--	0.39316	0.456594	0.389851	0.679218	0.696805	0.545328	1.54997	0.0134001	0.07836	up	--	GO:0009707 chloroplast outer membrane	GO:0046481 digalactosyldiacylglycerol synthase activity	--	K09480	ko00561: Glycerolipid metabolism;ko01100: Metabolic pathways	IPR001296: Glycosyl transferase, family 1;IPR044525: Digalactosyldiacylglycerol synthase 1/2	Mitochondrion	--
Isoform0007754	pos:171-2438	--	1.67502	1.8357	1.75237	5.29252	4.76767	5.14678	2.88937	1.65466e-05	0.00308036	up	GO:0005975 carbohydrate metabolic process	--	--	--	K06617	ko00052: Galactose metabolism;ko01100: Metabolic pathways	IPR008811: Glycosyl hydrolases 36;IPR013785: Aldolase-type TIM barrel;IPR017853: Glycoside hydrolase superfamily	Cytoplasm	--
Isoform0007801	pos:6-2453	--	0.103469	0.115716	0.0888317	0.0618084	0.0830774	0.0555412	0.650703	0.0462568	0.158742	down	GO:0006468 protein phosphorylation	GO:0016021 integral component of membrane	GO:0004672 protein kinase activity;GO:0005524 ATP binding	--	K13418	--	IPR008271: Serine/threonine-protein kinase, active site;IPR013210: Leucine-rich repeat-containing N-terminal, plant-type;IPR000719: Protein kinase domain;IPR001245: Serine-threonine/tyrosine-protein kinase, catalytic domain;IPR017441: Protein kinase, ATP binding site;IPR011009: Protein kinase-like domain superfamily;IPR001611: Leucine-rich repeat;IPR032675: Leucine-rich repeat domain superfamily	Plasma membrane	--
Isoform0007833	pos:454-2544	--	0.573385	0.524397	0.538784	0.375972	0.371264	0.270571	0.621917	0.0392351	0.143496	down	GO:0010039 response to iron ion;GO:0048316 seed development	GO:0005886 plasma membrane;GO:0016020 membrane;GO:0016021 integral component of membrane	GO:0035673 oligopeptide transmembrane transporter activity;GO:0051980 iron-nicotianamine transmembrane transporter activity	--	--	--	IPR045035: Metal-nicotianamine transporter YSL-like;IPR004813: Oligopeptide transporter, OPT superfamily	Plasma membrane	--
Isoform0007840	pos:123-836	--	19.0869	18.5922	18.494	35.6792	34.6527	34.6411	1.86874	1.4271e-06	0.00101507	up	GO:0006826 iron ion transport;GO:0006880 intracellular sequestering of iron ion	GO:0005737 cytoplasm;GO:0009507 chloroplast	GO:0004322 ferroxidase activity;GO:0008198 ferrous iron binding;GO:0008199 ferric iron binding	P: Inorganic ion transport and metabolism	K00522	--	IPR012347: Ferritin-like;IPR014034: Ferritin, conserved site;IPR009040: Ferritin-like diiron domain;IPR008331: Ferritin/DPS protein domain;IPR009078: Ferritin-like superfamily;IPR001519: Ferritin	chloroplast	--
Isoform0007975	pos:167-2284	--	0.423856	0.441679	0.380483	0.242843	0.263317	0.208198	0.573313	0.00419161	0.0423862	down	GO:0032259 methylation	GO:0005737 cytoplasm;GO:0016021 integral component of membrane	GO:0008168 methyltransferase activity	--	K23872	--	IPR029063: S-adenosyl-L-methionine-dependent methyltransferase superfamily;IPR004159: Putative S-adenosyl-L-methionine-dependent methyltransferase	Mitochondrion	--
Isoform0008028	pos:451-2481	--	0.134959	0.092651	0.121878	0.260016	0.168968	0.306505	2.10447	0.0338246	0.131481	up	GO:0050896 response to stimulus	GO:0005634 nucleus	GO:0003700 DNA-binding transcription factor activity;GO:0043565 sequence-specific DNA binding	--	K18835	ko04626: Plant-pathogen interaction	IPR036576: WRKY domain superfamily;IPR003657: WRKY domain;IPR044810: WRKY transcription factor, plant	Nucleus	--
Isoform0008066	pos:94-2271	--	0	0	0	0	0.181189	0.044517	inf	0	0	up	GO:0006635 fatty acid beta-oxidation	GO:0005777 peroxisome	GO:0003857 3-hydroxyacyl-CoA dehydrogenase activity;GO:0004165 delta(3)-delta(2)-enoyl-CoA isomerase activity;GO:0004300 enoyl-CoA hydratase activity;GO:0008692 3-hydroxybutyryl-CoA epimerase activity;GO:0070403 NAD+ binding	I: Lipid transport and metabolism	K10527	ko00071: Fatty acid degradation;ko00592: alpha-Linolenic acid metabolism;ko01100: Metabolic pathways;ko01110: Biosynthesis of secondary metabolites;ko01212: Fatty acid metabolism	IPR006108: 3-hydroxyacyl-CoA dehydrogenase, C-terminal;IPR018376: Enoyl-CoA hydratase/isomerase, conserved site;IPR006176: 3-hydroxyacyl-CoA dehydrogenase, NAD binding;IPR001753: Enoyl-CoA hydratase/isomerase;IPR008927: 6-phosphogluconate dehydrogenase-like, C-terminal domain superfamily;IPR036291: NAD(P)-binding domain superfamily;IPR029045: ClpP/crotonase-like domain superfamily;IPR006180: 3-hy…	Plasma membrane	--
Isoform0008071	pos:85-2490	--	0.154179	0.128958	0.103443	0.0521268	0	0.057179	0.424125	0.0105494	0.06927	down	--	GO:0016021 integral component of membrane	GO:0005385 zinc ion transmembrane transporter activity;GO:0005524 ATP binding;GO:0015086 cadmium ion transmembrane transporter activity;GO:0016887 ATP hydrolysis activity;GO:0019829 ATPase-coupled cation transmembrane transporter activity;GO:0046872 metal ion binding	P: Inorganic ion transport and metabolism	K01534	--	IPR027256: P-type ATPase, subfamily IB;IPR023299: P-type ATPase, cytoplasmic domain N;IPR023214: HAD superfamily;IPR008250: P-type ATPase, A domain superfamily;IPR044492: P-type ATPase, haloacid dehalogenase domain;IPR036163: Heavy metal-associated domain superfamily;IPR036412: HAD-like superfamily;IPR001757: P-type ATPase;IPR018303: P-type ATPase, phosphorylation site;IPR023298: P-type ATPase, t…	vacuolar membrane	--
Isoform0008073	pos:58-2241	--	0	0	0	0	0.383413	0.591548	inf	0	0	up	--	--	GO:0004842 ubiquitin-protein transferase activity	S: Function unknown	K09561	ko04120: Ubiquitin mediated proteolysis;ko04141: Protein processing in endoplasmic reticulum	IPR003613: U-box domain;IPR000225: Armadillo;IPR045210: PUB protein, U-box domain, plant;IPR011989: Armadillo-like helical;IPR013083: Zinc finger, RING/FYVE/PHD-type;IPR016024: Armadillo-type fold	Nucleus	--
Isoform0008112	pos:445-2487	--	0.13313	0	0.12758	0	0	0	0	0	0	down	--	GO:0016021 integral component of membrane	--	--	--	--	IPR006852: Protein of unknown function DUF616	Plasma membrane	--
Isoform0008113	pos:138-2327	--	2.54393	2.36072	2.50372	26.3505	26.4206	27.7715	10.8718	3.17773e-07	0.00101507	up	GO:0016310 phosphorylation;GO:0055129 L-proline biosynthetic process	GO:0005737 cytoplasm	GO:0004349 glutamate 5-kinase activity;GO:0004350 glutamate-5-semialdehyde dehydrogenase activity;GO:0005524 ATP binding	E: Amino acid transport and metabolism	K12657	ko00330: Arginine and proline metabolism;ko01100: Metabolic pathways;ko01110: Biosynthesis of secondary metabolites;ko01230: Biosynthesis of amino acids	IPR019797: Glutamate 5-kinase, conserved site;IPR016163: Aldehyde dehydrogenase, C-terminal;IPR000965: GPR domain;IPR036393: Acetylglutamate kinase-like superfamily;IPR001057: Glutamate/acetylglutamate kinase;IPR016161: Aldehyde/histidinol dehydrogenase;IPR005715: Glutamate 5-kinase/delta-1-pyrroline-5-carboxylate synthase;IPR001048: Aspartate/glutamate/uridylate kinase;IPR020593: Gamma-glutamyl …	Endoplasmic reticulum	--
Isoform0008145	pos:906-2450	--	0.216151	0.249862	0.233333	0.599614	0.577955	0.564317	2.49073	0.00052068	0.015613	up	GO:0005975 carbohydrate metabolic process	GO:0009507 chloroplast	GO:0008422 beta-glucosidase activity;GO:0102726 DIMBOA glucoside beta-D-glucosidase activity	G: Carbohydrate transport and metabolism	K01188	ko00460: Cyanoamino acid metabolism;ko00500: Starch and sucrose metabolism;ko00999: Biosynthesis of various plant secondary metabolites;ko01100: Metabolic pathways;ko01110: Biosynthesis of secondary metabolites	IPR001360: Glycoside hydrolase family 1;IPR033132: Glycosyl hydrolases family 1, N-terminal conserved site;IPR017853: Glycoside hydrolase superfamily	chloroplast	CS pos: 33-34. AVA-QS. Pr: 0.8593
Isoform0008203	pos:88-2190	--	0.227358	0.258367	0.209437	0.114244	0.176664	0.127865	0.602411	0.0400412	0.145007	down	GO:0051017 actin filament bundle assembly	--	GO:0005524 ATP binding;GO:0051015 actin filament binding	Z: Cytoskeleton	K17275	--	IPR001715: Calponin homology domain;IPR036872: CH domain superfamily;IPR039959: Fimbrin/Plastin;IPR001589: Actinin-type actin-binding domain, conserved site	Nucleus	--
Isoform0008204	pos:13-2121	--	0.18411	0.257916	0.268815	0	0.0875416	0.094937	0.385062	0.0100865	0.0673868	down	GO:0000373 Group II intron splicing;GO:0006397 mRNA processing	--	GO:0003723 RNA binding	--	K01148	ko03018: RNA degradation	IPR035920: YhbY-like superfamily;IPR001890: RNA-binding, CRM domain;IPR044599: CRS2-associated factor, plant	chloroplast	--
Isoform0008208	pos:1-2220	--	1.39777	1.17058	1.30036	2.67799	2.96482	2.84219	2.19324	0.000678999	0.0171317	up	--	GO:0005634 nucleus;GO:0005776 autophagosome	GO:0008270 zinc ion binding	S: Function unknown	K17987	--	IPR013783: Immunoglobulin-like fold;IPR032350: Next to BRCA1, central domain;IPR000433: Zinc finger, ZZ-type;IPR043145: Zinc finger, ZZ-type superfamily	Nucleus	--
Isoform0008296	pos:1123-2676	--	0	0	0	0.186533	0.127865	0.152666	inf	0	0	up	GO:0006119 oxidative phosphorylation;GO:0015990 electron transport coupled proton transport	GO:0005743 mitochondrial inner membrane;GO:0016021 integral component of membrane;GO:0045277 respiratory chain complex IV	GO:0004129 cytochrome-c oxidase activity;GO:0020037 heme binding;GO:0046872 metal ion binding	C: Energy production and conversion	K02256	ko00190: Oxidative phosphorylation;ko01100: Metabolic pathways	IPR000883: Cytochrome c oxidase subunit I;IPR036927: Cytochrome c oxidase-like, subunit I superfamily;IPR033944: Cytochrome c oxidase subunit I domain;IPR023615: Cytochrome c oxidase, subunit I, copper-binding site;IPR014241: Cytochrome c oxidase, subunit I bacterial type;IPR023616: Cytochrome c oxidase-like, subunit I domain	Plasma membrane	--
Isoform0008348	pos:84-2429	--	0.337558	0.270844	0.312909	0.998006	1.13539	1.15408	3.56827	0.000171845	0.00889979	up	GO:0005975 carbohydrate metabolic process	--	--	--	K06617	ko00052: Galactose metabolism;ko01100: Metabolic pathways	IPR017853: Glycoside hydrolase superfamily;IPR008811: Glycosyl hydrolases 36;IPR013785: Aldolase-type TIM barrel	Cytoplasm	--
Isoform0008393	pos:3-2231	--	0.910571	1.00011	0.78963	0.59769	0.467605	0.622641	0.625089	0.0157331	0.0855009	down	GO:0000301 retrograde transport, vesicle recycling within Golgi;GO:0007030 Golgi organization	GO:0000139 Golgi membrane;GO:0016021 integral component of membrane;GO:0031985 Golgi cisterna	--	--	--	--	IPR019177: Golgin subfamily A member 5	chloroplast	--
Isoform0008421	pos:309-2297	--	0.392317	0.274677	0.321812	0.6124	0.586257	0.660047	1.87975	0.0169099	0.0885746	up	GO:0055085 transmembrane transport	GO:0016021 integral component of membrane	--	--	K22047	--	IPR006685: Mechanosensitive ion channel MscS;IPR045042: Mechanosensitive ion channel protein YnaI-like;IPR010920: LSM domain superfamily	chloroplast	--
Isoform0008432	pos:180-2273	--	0.20228	0.236585	0.26518	0.16912	0.118702	0.167337	0.646491	0.0410513	0.147118	down	GO:0006261 DNA-templated DNA replication;GO:0006302 double-strand break repair	--	GO:0003677 DNA binding;GO:0003887 DNA-directed DNA polymerase activity;GO:0008408 3'-5' exonuclease activity	R: General function prediction only	K02335	ko03030: DNA replication;ko03410: Base excision repair;ko03420: Nucleotide excision repair;ko03440: Homologous recombination	IPR036397: Ribonuclease H superfamily;IPR002298: DNA polymerase A;IPR001098: DNA-directed DNA polymerase, family A, palm domain;IPR043502: DNA/RNA polymerase superfamily	chloroplast	--
Isoform0008537	pos:3-2294	--	0	0	0	0.0298359	0	0	inf	0	0	up	GO:0006468 protein phosphorylation	GO:0016021 integral component of membrane	GO:0004672 protein kinase activity;GO:0005524 ATP binding	--	K13436	ko04626: Plant-pathogen interaction	IPR001611: Leucine-rich repeat;IPR000719: Protein kinase domain;IPR001245: Serine-threonine/tyrosine-protein kinase, catalytic domain;IPR013210: Leucine-rich repeat-containing N-terminal, plant-type;IPR011009: Protein kinase-like domain superfamily;IPR032675: Leucine-rich repeat domain superfamily	chloroplast	--
Isoform0008599	pos:138-2051	--	0.0426382	0	0.0374572	0.0997953	0.0925406	0.205792	3.31379	0.0404273	0.145879	up	--	GO:0016021 integral component of membrane	--	I: Lipid transport and metabolism	K26544	--	IPR036273: CRAL/TRIO, N-terminal domain superfamily;IPR011074: CRAL/TRIO, N-terminal domain;IPR001251: CRAL-TRIO lipid binding domain;IPR036865: CRAL-TRIO lipid binding domain superfamily	chloroplast	--
Isoform0008611	pos:668-2161	--	0	0.0424004	0	0	0	0	0	0	0	down	--	GO:0016021 integral component of membrane	GO:0080115 myosin XI tail binding	--	--	--	IPR007656: GTD-binding domain;IPR039306: Myosin-binding protein	chloroplast	--
Isoform0008628	pos:96-2411	--	0.309085	0.428114	0.355784	0.679994	0.756867	0.777401	2.02589	0.00831293	0.0598323	up	GO:0016104 triterpenoid biosynthetic process	GO:0005811 lipid droplet	GO:0016866 intramolecular transferase activity	I: Lipid transport and metabolism	K01853	ko00100: Steroid biosynthesis;ko01100: Metabolic pathways;ko01110: Biosynthesis of secondary metabolites	IPR018333: Squalene cyclase;IPR032697: Squalene cyclase, N-terminal;IPR032696: Squalene cyclase, C-terminal;IPR002365: Terpene synthase, conserved site;IPR008930: Terpenoid cyclases/protein prenyltransferase alpha-alpha toroid	chloroplast	--
Isoform0008674	pos:266-2347	--	0.225279	0.210533	0.229295	0.475096	0.505355	0.346188	1.99462	0.0241219	0.110253	up	--	GO:0016021 integral component of membrane	GO:0022857 transmembrane transporter activity	R: General function prediction only	--	--	IPR036259: MFS transporter superfamily;IPR004331: SPX domain;IPR011701: Major facilitator superfamily;IPR045264: SPXM, SPX domain	Cytoplasm	--
Isoform0008704	pos:153-2294	--	1.97901	1.95538	1.93605	1.01169	0.888956	0.971884	0.489322	0.00227405	0.0298115	down	GO:0006559 L-phenylalanine catabolic process;GO:0009800 cinnamic acid biosynthetic process	GO:0005737 cytoplasm	GO:0016841 ammonia-lyase activity;GO:0045548 phenylalanine ammonia-lyase activity	Q: Secondary metabolites biosynthesis, transport and catabolism	K10775	ko00360: Phenylalanine metabolism;ko00940: Phenylpropanoid biosynthesis;ko01100: Metabolic pathways;ko01110: Biosynthesis of secondary metabolites	IPR001106: Aromatic amino acid lyase;IPR022313: Phenylalanine/histidine ammonia-lyases, active site;IPR008948: L-Aspartase-like;IPR024083: Fumarase/histidase, N-terminal;IPR023144: Phenylalanine ammonia-lyase, shielding domain superfamily;IPR005922: Phenylalanine ammonia-lyase	chloroplast	--
Isoform0008733	pos:71-2362	--	0.449533	0.450696	0.521896	0.260737	0.228786	0.272238	0.53565	0.000980594	0.0199243	down	--	--	--	--	--	--	IPR025344: ARC6, IMS domain;IPR044685: Protein ACCUMULATION AND REPLICATION OF CHLOROPLASTS 6-like;IPR036869: Chaperone J-domain superfamily	chloroplast	--
Isoform0008735	pos:192-2390	--	2.741	2.31647	2.40509	4.07267	4.32953	4.32831	1.70592	0.00393066	0.041084	up	GO:0031222 arabinan catabolic process;GO:0045493 xylan catabolic process	GO:0005576 extracellular region	GO:0009044 xylan 1,4-beta-xylosidase activity;GO:0046556 alpha-L-arabinofuranosidase activity	--	K15920	ko00520: Amino sugar and nucleotide sugar metabolism;ko01100: Metabolic pathways	IPR036881: Glycoside hydrolase family 3 C-terminal domain superfamily;IPR036962: Glycoside hydrolase, family 3, N-terminal domain superfamily;IPR017853: Glycoside hydrolase superfamily;IPR044993: Beta-D-xylosidase;IPR001764: Glycoside hydrolase, family 3, N-terminal;IPR026891: Fibronectin type III-like domain;IPR002772: Glycoside hydrolase family 3 C-terminal domain;IPR013783: Immunoglobulin-like…	chloroplast	--
Isoform0008808	pos:146-2281	--	0.515426	0.291178	0.327778	0.17393	0.220466	0.141807	0.472682	0.0311331	0.126144	down	GO:0006559 L-phenylalanine catabolic process;GO:0009800 cinnamic acid biosynthetic process	GO:0005737 cytoplasm	GO:0045548 phenylalanine ammonia-lyase activity	Q: Secondary metabolites biosynthesis, transport and catabolism	K10775	ko00360: Phenylalanine metabolism;ko00940: Phenylpropanoid biosynthesis;ko01100: Metabolic pathways;ko01110: Biosynthesis of secondary metabolites	IPR023144: Phenylalanine ammonia-lyase, shielding domain superfamily;IPR001106: Aromatic amino acid lyase;IPR008948: L-Aspartase-like;IPR022313: Phenylalanine/histidine ammonia-lyases, active site;IPR005922: Phenylalanine ammonia-lyase;IPR024083: Fumarase/histidase, N-terminal	chloroplast	--
Isoform0008811	pos:299-2242	--	0	0	0	0.269948	0.194801	0.294659	inf	0	0	up	--	GO:0016021 integral component of membrane	GO:0008271 secondary active sulfate transmembrane transporter activity	P: Inorganic ion transport and metabolism	K17471	--	IPR018045: Sulphate anion transporter, conserved site;IPR036513: STAS domain superfamily;IPR001902: SLC26A/SulP transporter;IPR011547: SLC26A/SulP transporter domain;IPR002645: STAS domain	Plasma membrane	--
Isoform0008829	pos:144-2306	--	0.146579	0.116565	0.144749	0.0760163	0.0906384	0.0550031	0.54342	0.0323588	0.128688	down	GO:0006559 L-phenylalanine catabolic process;GO:0009800 cinnamic acid biosynthetic process	GO:0005737 cytoplasm	GO:0045548 phenylalanine ammonia-lyase activity	Q: Secondary metabolites biosynthesis, transport and catabolism	K10775	ko00360: Phenylalanine metabolism;ko00940: Phenylpropanoid biosynthesis;ko01100: Metabolic pathways;ko01110: Biosynthesis of secondary metabolites	IPR001106: Aromatic amino acid lyase;IPR024083: Fumarase/histidase, N-terminal;IPR023144: Phenylalanine ammonia-lyase, shielding domain superfamily;IPR008948: L-Aspartase-like;IPR022313: Phenylalanine/histidine ammonia-lyases, active site;IPR005922: Phenylalanine ammonia-lyase	chloroplast	--
Isoform0008841	pos:802-2346	--	0.126263	0.225932	0.201201	0.739306	0.564172	0.53248	3.31762	0.0080691	0.0592699	up	GO:0005975 carbohydrate metabolic process	GO:0009507 chloroplast	GO:0008422 beta-glucosidase activity;GO:0102726 DIMBOA glucoside beta-D-glucosidase activity	G: Carbohydrate transport and metabolism	K01188	ko00460: Cyanoamino acid metabolism;ko00500: Starch and sucrose metabolism;ko00999: Biosynthesis of various plant secondary metabolites;ko01100: Metabolic pathways;ko01110: Biosynthesis of secondary metabolites	IPR001360: Glycoside hydrolase family 1;IPR033132: Glycosyl hydrolases family 1, N-terminal conserved site;IPR017853: Glycoside hydrolase superfamily	chloroplast	CS pos: 33-34. AVA-QS. Pr: 0.8579
Isoform0009015	pos:168-2294	--	0.173643	0.171574	0.227987	0.353827	0.369811	0.461196	2.06704	0.00438497	0.0436477	up	GO:0006457 protein folding	GO:0009505 plant-type cell wall	GO:0004601 peroxidase activity;GO:0005524 ATP binding;GO:0016887 ATP hydrolysis activity;GO:0051082 unfolded protein binding	O: Posttranslational modification, protein turnover, chaperones	K04079	ko04141: Protein processing in endoplasmic reticulum;ko04626: Plant-pathogen interaction	IPR001404: Heat shock protein Hsp90 family;IPR003594: Histidine kinase/HSP90-like ATPase;IPR036890: Histidine kinase/HSP90-like ATPase superfamily;IPR020575: Heat shock protein Hsp90, N-terminal;IPR020568: Ribosomal protein S5 domain 2-type fold;IPR037196: HSP90, C-terminal domain;IPR019805: Heat shock protein Hsp90, conserved site	Cytoplasm	--
Isoform0009068	pos:3-2210	--	0.238841	0.278529	0.231586	0.118725	0.166026	0.117662	0.537299	0.0161924	0.0863262	down	GO:0051171 regulation of nitrogen compound metabolic process;GO:0060255 regulation of macromolecule metabolic process;GO:0080090 regulation of primary metabolic process	--	GO:0003677 DNA binding;GO:0046872 metal ion binding	R: General function prediction only	--	--	IPR036770: Ankyrin repeat-containing domain superfamily;IPR000571: Zinc finger, CCCH-type;IPR002110: Ankyrin repeat;IPR045234: RING finger protein Unkempt-like;IPR036855: Zinc finger, CCCH-type superfamily	chloroplast	--
Isoform0009116	pos:239-2206	--	1.70671	1.70786	1.74992	0.956143	1.00896	1.11178	0.595777	0.00575592	0.0493733	down	GO:0072657 protein localization to membrane	GO:0000139 Golgi membrane;GO:0010008 endosome membrane;GO:0016020 membrane;GO:0016021 integral component of membrane	--	U: Intracellular trafficking, secretion, and vesicular transport	K17086	--	IPR004240: Nonaspanin (TM9SF)	Plasma membrane	CS pos: 28-29. VDA-FY. Pr: 0.9922
Isoform0009129	pos:298-2295	--	1.59554	1.55099	1.55299	0.82	0.779619	0.6989	0.489096	0.00326559	0.0373025	down	GO:0007131 reciprocal meiotic recombination	--	--	--	--	--	--	Nucleus	--
Isoform0009148	pos:443-2359	--	3.87032	4.42874	4.23257	2.23548	2.39029	2.51535	0.569848	0.000475271	0.0150866	down	GO:0016121 carotene catabolic process	GO:0009570 chloroplast stroma	GO:0010436 carotenoid dioxygenase activity;GO:0046872 metal ion binding	Q: Secondary metabolites biosynthesis, transport and catabolism	K09840	ko00906: Carotenoid biosynthesis;ko01100: Metabolic pathways;ko01110: Biosynthesis of secondary metabolites	IPR004294: Carotenoid oxygenase	Cytoplasm	--
Isoform0009232	pos:396-2315	--	5.91416	6.10435	5.99038	3.26888	3.41126	3.92582	0.588929	0.00914779	0.0633903	down	--	GO:0000139 Golgi membrane;GO:0010008 endosome membrane;GO:0016021 integral component of membrane	--	U: Intracellular trafficking, secretion, and vesicular transport	K17086	--	IPR004240: Nonaspanin (TM9SF)	Plasma membrane	--
Isoform0009302	pos:2-2377	--	8.87124	8.47502	8.64142	4.67996	4.79091	4.89433	0.55277	5.69367e-06	0.00170513	down	GO:0015979 photosynthesis;GO:0015995 chlorophyll biosynthetic process	--	GO:0005524 ATP binding;GO:0016851 magnesium chelatase activity	--	K03403	ko00860: Porphyrin metabolism;ko01100: Metabolic pathways;ko01110: Biosynthesis of secondary metabolites	IPR011771: Magnesium-chelatase, subunit H;IPR003672: CobN/magnesium chelatase	Cytoplasm	--
Isoform0009307	pos:438-2030	--	2.21074	2.32578	2.06462	0.805941	1.22171	1.22276	0.492402	0.0287395	0.121521	down	GO:0006541 glutamine metabolic process;GO:0044210 'de novo' CTP biosynthetic process	--	GO:0003883 CTP synthase activity;GO:0005524 ATP binding	F: Nucleotide transport and metabolism	K01937	ko00240: Pyrimidine metabolism;ko01100: Metabolic pathways;ko01232: Nucleotide metabolism;ko01240: Biosynthesis of cofactors	IPR017456: CTP synthase, N-terminal;IPR004468: CTP synthase;IPR029062: Class I glutamine amidotransferase-like;IPR027417: P-loop containing nucleoside triphosphate hydrolase;IPR033828: CTP synthase GATase domain;IPR017926: Glutamine amidotransferase	Cytoplasm	--
Isoform0009381	pos:1228-2292	--	0.140449	0	0	0	0	0	0	0	0	down	GO:0006559 L-phenylalanine catabolic process;GO:0009800 cinnamic acid biosynthetic process	GO:0005737 cytoplasm	GO:0045548 phenylalanine ammonia-lyase activity	Q: Secondary metabolites biosynthesis, transport and catabolism	K10775	ko00360: Phenylalanine metabolism;ko00940: Phenylpropanoid biosynthesis;ko01100: Metabolic pathways;ko01110: Biosynthesis of secondary metabolites	IPR005922: Phenylalanine ammonia-lyase;IPR001106: Aromatic amino acid lyase;IPR023144: Phenylalanine ammonia-lyase, shielding domain superfamily;IPR008948: L-Aspartase-like	Cytoplasm	--
Isoform0009430	pos:93-2204	--	11.9943	11.0177	10.008	4.74693	4.45413	4.65742	0.4197	0.00145362	0.0239773	down	GO:0006559 L-phenylalanine catabolic process;GO:0009800 cinnamic acid biosynthetic process	GO:0005737 cytoplasm	GO:0045548 phenylalanine ammonia-lyase activity	Q: Secondary metabolites biosynthesis, transport and catabolism	K10775	ko00360: Phenylalanine metabolism;ko00940: Phenylpropanoid biosynthesis;ko01100: Metabolic pathways;ko01110: Biosynthesis of secondary metabolites	IPR008948: L-Aspartase-like;IPR001106: Aromatic amino acid lyase;IPR022313: Phenylalanine/histidine ammonia-lyases, active site;IPR024083: Fumarase/histidase, N-terminal;IPR023144: Phenylalanine ammonia-lyase, shielding domain superfamily;IPR005922: Phenylalanine ammonia-lyase	chloroplast	--
Isoform0009475	pos:26-2158	--	0.926463	1.14044	1.26887	1.93443	2.14378	1.69697	1.73129	0.0105117	0.0691052	up	--	--	--	--	--	--	IPR011042: Six-bladed beta-propeller, TolB-like;IPR011659: WD40-like beta propeller	chloroplast	CS pos: 27-28. SSA-AA. Pr: 0.3074
Isoform0009503	pos:45-1958	--	0.0881559	0.111417	0.137628	0.0676161	0.0533552	0	0.538128	0.0442438	0.154853	down	--	--	--	R: General function prediction only	--	--	IPR002885: Pentatricopeptide repeat;IPR011990: Tetratricopeptide-like helical domain superfamily;IPR033443: Pentacotripeptide-repeat region of PRORP	chloroplast	--
Isoform0009522	pos:155-2293	--	0	0	0	0	0	0.101643	inf	0	0	up	GO:0006559 L-phenylalanine catabolic process;GO:0009800 cinnamic acid biosynthetic process	GO:0005737 cytoplasm	GO:0045548 phenylalanine ammonia-lyase activity	Q: Secondary metabolites biosynthesis, transport and catabolism	K10775	ko00360: Phenylalanine metabolism;ko00940: Phenylpropanoid biosynthesis;ko01100: Metabolic pathways;ko01110: Biosynthesis of secondary metabolites	IPR001106: Aromatic amino acid lyase;IPR005922: Phenylalanine ammonia-lyase;IPR023144: Phenylalanine ammonia-lyase, shielding domain superfamily;IPR022313: Phenylalanine/histidine ammonia-lyases, active site;IPR008948: L-Aspartase-like;IPR024083: Fumarase/histidase, N-terminal	chloroplast	--
Isoform0009544	pos:244-2439	--	0.605488	0.515293	0.492333	0.367307	0.281098	0.286446	0.579532	0.00857662	0.0609028	down	GO:0006508 proteolysis	--	GO:0004252 serine-type endopeptidase activity	--	K25898	--	IPR041469: Subtilisin-like protease, fibronectin type-III domain;IPR000209: Peptidase S8/S53 domain;IPR010259: Peptidase S8 propeptide/proteinase inhibitor I9;IPR015500: Peptidase S8, subtilisin-related;IPR045051: Subtilisin-like protease;IPR034197: Cucumisin-like catalytic domain;IPR036852: Peptidase S8/S53 domain superfamily;IPR023828: Peptidase S8, subtilisin, Ser-active site;IPR037045: Peptid…	Cytoplasm	--
Isoform0009583	pos:93-2081	--	0	0	0	0	0.0241062	0	inf	0	0	up	GO:0006468 protein phosphorylation	GO:0016021 integral component of membrane	GO:0004672 protein kinase activity;GO:0005524 ATP binding	--	K00924	--	IPR002902: Gnk2-homologous domain;IPR038408: Gnk2-homologous domain superfamily;IPR017441: Protein kinase, ATP binding site;IPR000719: Protein kinase domain;IPR008271: Serine/threonine-protein kinase, active site;IPR011009: Protein kinase-like domain superfamily	Plasma membrane	CS pos: 19-20. CRA-AV. Pr: 0.4274
Isoform0009723	pos:171-2177	--	0.976688	1.03223	1.10057	0.461891	0.438491	0.478252	0.443364	8.54134e-05	0.00676238	down	--	--	--	R: General function prediction only	K17964	--	IPR002885: Pentatricopeptide repeat;IPR011990: Tetratricopeptide-like helical domain superfamily;IPR033443: Pentacotripeptide-repeat region of PRORP	Cytoplasm	--
Isoform0009778	pos:95-2104	--	0.154319	0.140957	0.174878	0.101735	0.0999575	0.108853	0.66052	0.0123942	0.0753498	down	--	--	GO:0003723 RNA binding;GO:0003724 RNA helicase activity;GO:0005524 ATP binding;GO:0016787 hydrolase activity	A: RNA processing and modification	K14776	--	IPR027417: P-loop containing nucleoside triphosphate hydrolase;IPR025313: Domain of unknown function DUF4217;IPR014014: RNA helicase, DEAD-box type, Q motif;IPR001650: Helicase, C-terminal;IPR014001: Helicase superfamily 1/2, ATP-binding domain;IPR011545: DEAD/DEAH box helicase domain	Mitochondrion	--
Isoform0009864	pos:108-2228	--	0.742873	0.845584	0.841177	3.89573	3.41991	3.45735	4.434	1.50829e-05	0.00297978	up	GO:0034620 cellular response to unfolded protein;GO:0042026 protein refolding;GO:0051085 chaperone cofactor-dependent protein refolding	GO:0005737 cytoplasm	GO:0005524 ATP binding;GO:0016887 ATP hydrolysis activity;GO:0031072 heat shock protein binding;GO:0044183 protein folding chaperone;GO:0051082 unfolded protein binding;GO:0051787 misfolded protein binding;GO:0140662 ATP-dependent protein folding chaperone	O: Posttranslational modification, protein turnover, chaperones	K03283	ko03040: Spliceosome;ko04141: Protein processing in endoplasmic reticulum;ko04144: Endocytosis	IPR043129: ATPase, nucleotide binding domain;IPR029048: Heat shock protein 70kD, C-terminal domain superfamily;IPR018181: Heat shock protein 70, conserved site;IPR029047: Heat shock protein 70kD, peptide-binding domain superfamily;IPR013126: Heat shock protein 70 family	Cytoplasm	--
Isoform0009921	pos:252-2144	--	0.547101	0.608079	0.619492	0.373589	0.339485	0.361732	0.605636	0.000745763	0.0180874	down	GO:0032259 methylation	GO:0016021 integral component of membrane	GO:0008168 methyltransferase activity	--	K23872	--	IPR004159: Putative S-adenosyl-L-methionine-dependent methyltransferase;IPR029063: S-adenosyl-L-methionine-dependent methyltransferase superfamily	Cytoplasm	--
Isoform0009931	pos:160-2112	--	0.145714	0.0904735	0.0844652	0.20812	0.254624	0.216635	2.11874	0.0335009	0.130813	up	GO:0051603 proteolysis involved in cellular protein catabolic process	GO:0005615 extracellular space;GO:0005764 lysosome	GO:0004197 cysteine-type endopeptidase activity	O: Posttranslational modification, protein turnover, chaperones	K25900	--	IPR000668: Peptidase C1A, papain C-terminal;IPR039417: Papain-like cysteine endopeptidase;IPR000169: Cysteine peptidase, cysteine active site;IPR013201: Cathepsin propeptide inhibitor domain (I29);IPR038765: Papain-like cysteine peptidase superfamily	Plasma membrane	--
Isoform0009984	pos:211-2094	--	0.136315	0.176156	0.148055	0.313	0.374112	0.288922	2.11939	0.0022044	0.0292772	up	--	--	GO:0003993 acid phosphatase activity;GO:0046872 metal ion binding	G: Carbohydrate transport and metabolism	K22390	--	IPR041792: Purple acid phosphatase, metallophosphatase domain;IPR025733: Iron/zinc purple acid phosphatase-like C-terminal domain;IPR008963: Purple acid phosphatase-like, N-terminal;IPR004843: Calcineurin-like phosphoesterase domain, ApaH type;IPR029052: Metallo-dependent phosphatase-like;IPR040974: Purple acid phosphatase, Fn3-like domain;IPR015914: Purple acid phosphatase, N-terminal	vacuolar membrane	CS pos: 24-25. CSA-LP. Pr: 0.9559
Isoform0010005	pos:123-1907	--	0.0707842	0.0619907	0.0834409	1.08941	1.11688	1.10438	15.3119	0.000917172	0.0194384	up	--	--	GO:0016702 oxidoreductase activity, acting on single donors with incorporation of molecular oxygen, incorporation of two atoms of oxygen;GO:0046872 metal ion binding	Q: Secondary metabolites biosynthesis, transport and catabolism	K09840	ko00906: Carotenoid biosynthesis;ko01100: Metabolic pathways;ko01110: Biosynthesis of secondary metabolites	IPR004294: Carotenoid oxygenase	chloroplast	--
Isoform0010013	pos:251-2338	--	0.180937	0.228625	0.202436	0.127734	0.12322	0.151476	0.657567	0.0108165	0.0703533	down	--	--	--	--	--	--	IPR005049: STELLO-like	Mitochondrion	--
Isoform0010096	pos:302-2080	--	4.17828	4.28613	4.11651	7.01338	6.71724	6.41375	1.60118	0.000703262	0.017551	up	GO:0005975 carbohydrate metabolic process	--	GO:0004553 hydrolase activity, hydrolyzing O-glycosyl compounds	G: Carbohydrate transport and metabolism	K01193	ko00052: Galactose metabolism;ko00500: Starch and sucrose metabolism;ko01100: Metabolic pathways;ko01110: Biosynthesis of secondary metabolites	IPR013189: Glycosyl hydrolase family 32, C-terminal;IPR013320: Concanavalin A-like lectin/glucanase domain superfamily;IPR013148: Glycosyl hydrolase family 32, N-terminal;IPR023296: Glycosyl hydrolase, five-bladed beta-propellor domain superfamily;IPR001362: Glycoside hydrolase, family 32	vacuolar membrane	CS pos: 18-19. VTS-VF. Pr: 0.6648
Isoform0010104	pos:719-2158	--	5.59662	4.14061	3.48855	2.00234	2.52517	2.49661	0.531093	0.0276485	0.118899	down	GO:0006024 glycosaminoglycan biosynthetic process;GO:0006065 UDP-glucuronate biosynthetic process	GO:0005634 nucleus;GO:0005829 cytosol	GO:0003979 UDP-glucose 6-dehydrogenase activity;GO:0051287 NAD binding	G: Carbohydrate transport and metabolism;T: Signal transduction mechanisms	K00012	ko00040: Pentose and glucuronate interconversions;ko00053: Ascorbate and aldarate metabolism;ko00520: Amino sugar and nucleotide sugar metabolism;ko01100: Metabolic pathways;ko01240: Biosynthesis of cofactors;ko01250: Biosynthesis of nucleotide sugars	IPR017476: UDP-glucose/GDP-mannose dehydrogenase;IPR028356: UDP-glucose 6-dehydrogenase, eukaryotic type;IPR001732: UDP-glucose/GDP-mannose dehydrogenase, N-terminal;IPR014027: UDP-glucose/GDP-mannose dehydrogenase, C-terminal;IPR014026: UDP-glucose/GDP-mannose dehydrogenase, dimerisation;IPR036291: NAD(P)-binding domain superfamily;IPR036220: UDP-glucose/GDP-mannose dehydrogenase, C-terminal dom…	Extracell	--
Isoform0010119	pos:105-2279	--	0.312584	0.330614	0.301204	0.19742	0.180295	0.229692	0.643166	0.0147656	0.0826203	down	GO:0042254 ribosome biogenesis	GO:0005730 nucleolus	GO:0005525 GTP binding	R: General function prediction only	K06943	ko03008: Ribosome biogenesis in eukaryotes	IPR012973: NOG, C-terminal;IPR027417: P-loop containing nucleoside triphosphate hydrolase;IPR024926: Nucleolar GTP-binding protein 1;IPR041623: NOG1, N-terminal helical domain;IPR031167: OBG-type guanine nucleotide-binding (G) domain;IPR006073: GTP binding domain;IPR010674: Nucleolar GTP-binding protein 1, Rossman-fold domain	Cytoplasm	--
Isoform0010129	pos:315-2156	--	1.04839	1.04613	1.06861	0.451233	0.526443	0.509581	0.470185	0.00327338	0.0373296	down	GO:0032259 methylation	GO:0005737 cytoplasm;GO:0016021 integral component of membrane	GO:0008168 methyltransferase activity	--	K23872	--	IPR029063: S-adenosyl-L-methionine-dependent methyltransferase superfamily;IPR004159: Putative S-adenosyl-L-methionine-dependent methyltransferase	Cytoplasm	--
Isoform0010145	minus-strand pos:1782-2414	--	1.38638	1.47579	1.63101	2.58873	2.19463	2.36873	1.59177	0.00229406	0.0299271	up	GO:0006749 glutathione metabolic process;GO:0042221 response to chemical	GO:0005737 cytoplasm	GO:0004364 glutathione transferase activity	O: Posttranslational modification, protein turnover, chaperones	K00799	ko00480: Glutathione metabolism;ko01100: Metabolic pathways	IPR045074: Glutathione S-transferases Tau, C-terminal alpha helical domain, plant;IPR045073: Glutathione S-transferase Omega/Tau-like;IPR036282: Glutathione S-transferase, C-terminal domain superfamily;IPR004045: Glutathione S-transferase, N-terminal;IPR036249: Thioredoxin-like superfamily;IPR010987: Glutathione S-transferase, C-terminal-like	chloroplast	--
Isoform0010168	pos:246-1988	--	0.599624	0.555572	0.626306	0.391182	0.366743	0.402926	0.651613	0.000847995	0.0188419	down	GO:0009738 abscisic acid-activated signaling pathway;GO:0080163 regulation of protein serine/threonine phosphatase activity	GO:0005634 nucleus;GO:0005737 cytoplasm	GO:0000049 tRNA binding;GO:0004809 tRNA (guanine-N2-)-methyltransferase activity;GO:0004864 protein phosphatase inhibitor activity;GO:0010427 abscisic acid binding;GO:0038023 signaling receptor activity	J: Translation, ribosomal structure and biogenesis	K00555	--	IPR042296: tRNA methyltransferase, Trm1, C-terminal;IPR002905: tRNA methyltransferase, Trm1;IPR029063: S-adenosyl-L-methionine-dependent methyltransferase superfamily	Cytoplasm	--
Isoform0010170	pos:163-2025	--	2.69481	2.71177	2.37983	0.980462	0.848765	1.0113	0.364806	0.00017569	0.00903101	down	GO:0030245 cellulose catabolic process	GO:0016021 integral component of membrane	GO:0008810 cellulase activity	--	K01179	ko00500: Starch and sucrose metabolism;ko01100: Metabolic pathways	IPR001701: Glycoside hydrolase family 9;IPR012341: Six-hairpin glycosidase-like superfamily;IPR018221: Glycoside hydrolase family 9, His active site;IPR033126: Glycosyl hydrolases family 9, Asp/Glu active sites;IPR008928: Six-hairpin glycosidase superfamily	Plasma membrane	--
Isoform0010226	pos:1-1956	--	1.86677	1.88418	1.91327	0.653236	0.595598	0.61563	0.329165	0.000273213	0.0113367	down	GO:0009833 plant-type primary cell wall biogenesis;GO:0030244 cellulose biosynthetic process;GO:0071555 cell wall organization	GO:0005886 plasma membrane;GO:0016021 integral component of membrane	GO:0016759 cellulose synthase activity;GO:0016760 cellulose synthase (UDP-forming) activity;GO:0046872 metal ion binding	--	K10999	--	IPR005150: Cellulose synthase;IPR029044: Nucleotide-diphospho-sugar transferases	Plasma membrane	--
Isoform0010235	pos:228-2201	--	0.198737	0	0.0844794	0	0	0	0	0	0	down	GO:0009786 regulation of asymmetric cell division	--	--	--	--	--	IPR040378: Protein BREAKING OF ASYMMETRY IN THE STOMATAL LINEAGE	Peroxisome	--
Isoform0010259	pos:263-2059	--	0.385446	0.322063	0.421453	0.718121	0.827544	0.782565	2.06228	0.00378239	0.0404552	up	GO:0006541 glutamine metabolic process;GO:0044210 'de novo' CTP biosynthetic process	--	GO:0003883 CTP synthase activity;GO:0005524 ATP binding	F: Nucleotide transport and metabolism	K01937	ko00240: Pyrimidine metabolism;ko01100: Metabolic pathways;ko01232: Nucleotide metabolism;ko01240: Biosynthesis of cofactors	IPR004468: CTP synthase;IPR029062: Class I glutamine amidotransferase-like;IPR033828: CTP synthase GATase domain;IPR027417: P-loop containing nucleoside triphosphate hydrolase;IPR017926: Glutamine amidotransferase;IPR017456: CTP synthase, N-terminal	chloroplast	--
Isoform0010263	pos:281-1948	--	0.540748	0.563828	0.599001	1.23259	1.13079	1.02834	1.99094	0.00111658	0.021292	up	--	--	GO:0005524 ATP binding	R: General function prediction only	K06185	--	IPR027417: P-loop containing nucleoside triphosphate hydrolase;IPR003439: ABC transporter-like, ATP-binding domain;IPR017871: ABC transporter-like, conserved site;IPR003593: AAA+ ATPase domain;IPR032781: ABC-transporter extension domain	Cytoplasm	--
Isoform0010318	pos:294-2150	--	0.767247	0.815968	0.832024	0.431712	0.362596	0.217385	0.418878	0.0458634	0.158152	down	GO:0030245 cellulose catabolic process	GO:0016021 integral component of membrane	GO:0008810 cellulase activity	--	K01179	ko00500: Starch and sucrose metabolism;ko01100: Metabolic pathways	IPR018221: Glycoside hydrolase family 9, His active site;IPR033126: Glycosyl hydrolases family 9, Asp/Glu active sites;IPR008928: Six-hairpin glycosidase superfamily;IPR012341: Six-hairpin glycosidase-like superfamily;IPR001701: Glycoside hydrolase family 9	Plasma membrane	--
Isoform0010379	pos:419-2053	--	0.403855	0.421052	0.439069	0.234223	0.245109	0.257171	0.582688	0.00012724	0.007688	down	GO:0016070 RNA metabolic process	GO:0005730 nucleolus	GO:0003723 RNA binding;GO:0003724 RNA helicase activity;GO:0005524 ATP binding;GO:0016787 hydrolase activity	A: RNA processing and modification	K16911	--	IPR014001: Helicase superfamily 1/2, ATP-binding domain;IPR012562: GUCT;IPR011545: DEAD/DEAH box helicase domain;IPR001650: Helicase, C-terminal;IPR035979: RNA-binding domain superfamily;IPR027417: P-loop containing nucleoside triphosphate hydrolase;IPR000629: ATP-dependent RNA helicase DEAD-box, conserved site	Cytoplasm	--
Isoform0010455	pos:200-1954	--	0.20008	0.115602	0.16145	0.0422262	0.0504702	0.0780392	0.357837	0.0133511	0.0782661	down	--	--	--	--	--	--	--	Nucleus	--
Isoform0010456	pos:147-1985	--	0.0260324	0	0	0	0	0	0	0	0	down	--	--	--	--	--	--	IPR007658: Protein of unknown function DUF594;IPR025315: Domain of unknown function DUF4220	Plasma membrane	--
Isoform0010469	pos:217-777	--	0.400986	0.262757	0.330097	0.657609	0.644777	0.676848	1.9915	0.0275121	0.118541	up	--	--	--	A: RNA processing and modification	K12890	ko03040: Spliceosome	IPR012677: Nucleotide-binding alpha-beta plait domain superfamily;IPR000504: RNA recognition motif domain;IPR035979: RNA-binding domain superfamily	Cytoplasm	--
Isoform0010543	pos:71-2101	--	0	0.0417116	0.0217163	0	0	0	0	0	0	down	--	GO:0005634 nucleus	--	J: Translation, ribosomal structure and biogenesis	K14833	--	IPR005343: Nucleolar complex protein 2	Nucleus	--
Isoform0010549	pos:235-2292	--	0.172106	0.246853	0.202911	0.373738	0.30506	0.323144	1.61118	0.0244031	0.110949	up	GO:0044249 cellular biosynthetic process;GO:1901576 organic substance biosynthetic process	--	GO:0004144 diacylglycerol O-acyltransferase activity	--	--	--	IPR029058: Alpha/Beta hydrolase fold;IPR007130: Diacylglycerol acyltransferase	chloroplast	--
Isoform0010583	pos:142-2262	--	1.41317	1.26612	1.25324	0.802151	0.893517	0.918052	0.664642	0.0019566	0.0272264	down	GO:0006559 L-phenylalanine catabolic process;GO:0009800 cinnamic acid biosynthetic process	GO:0005737 cytoplasm	GO:0045548 phenylalanine ammonia-lyase activity	Q: Secondary metabolites biosynthesis, transport and catabolism	K10775	ko00360: Phenylalanine metabolism;ko00940: Phenylpropanoid biosynthesis;ko01100: Metabolic pathways;ko01110: Biosynthesis of secondary metabolites	IPR001106: Aromatic amino acid lyase;IPR022313: Phenylalanine/histidine ammonia-lyases, active site;IPR008948: L-Aspartase-like;IPR005922: Phenylalanine ammonia-lyase;IPR023144: Phenylalanine ammonia-lyase, shielding domain superfamily;IPR024083: Fumarase/histidase, N-terminal	chloroplast	--
Isoform0010712	pos:63-2183	--	0.627589	0.804141	0.699779	1.32057	1.37592	1.24972	1.85137	0.0066774	0.053419	up	--	GO:0016021 integral component of membrane	GO:0004497 monooxygenase activity;GO:0005506 iron ion binding;GO:0016705 oxidoreductase activity, acting on paired donors, with incorporation or reduction of molecular oxygen;GO:0020037 heme binding	Q: Secondary metabolites biosynthesis, transport and catabolism	K24542	--	IPR036396: Cytochrome P450 superfamily;IPR017972: Cytochrome P450, conserved site;IPR001128: Cytochrome P450;IPR002401: Cytochrome P450, E-class, group I	chloroplast	--
Isoform0010719	pos:111-2012	--	0.979784	0.974752	1.02067	4.07607	3.80646	4.20157	4.0616	3.33967e-05	0.00460073	up	GO:0009737 response to abscisic acid	--	--	--	--	--	IPR037491: Low-temperature-induced 78kDa/65kDa	Nucleus	--
Isoform0010769	pos:637-2160	--	2.35041	2.03649	2.57449	3.9774	3.55894	3.99428	1.65637	0.00651071	0.0526359	up	GO:0006508 proteolysis;GO:0006629 lipid metabolic process	--	GO:0004190 aspartic-type endopeptidase activity	O: Posttranslational modification, protein turnover, chaperones	K08245	--	IPR001461: Aspartic peptidase A1 family;IPR033121: Peptidase family A1 domain;IPR021109: Aspartic peptidase domain superfamily;IPR001969: Aspartic peptidase, active site;IPR008138: Saposin B type, region 2;IPR033869: Phytepsin;IPR007856: Saposin-like type B, region 1;IPR008139: Saposin B type domain;IPR011001: Saposin-like	chloroplast	CS pos: 25-26. SQA-EG. Pr: 0.7168
Isoform0010843	pos:772-2217	--	0.826488	0.743223	0.625914	1.23732	1.09846	1.18984	1.60574	0.0157078	0.0854979	up	GO:0005975 carbohydrate metabolic process	--	GO:0042973 glucan endo-1,3-beta-D-glucosidase activity	--	K19892	ko00500: Starch and sucrose metabolism;ko01100: Metabolic pathways	IPR000490: Glycoside hydrolase family 17;IPR012946: X8 domain;IPR017853: Glycoside hydrolase superfamily;IPR044965: Glycoside hydrolase family 17, plant	Nucleus	--
Isoform0010845	pos:210-1934	--	15.0035	13.3165	13.3378	8.67494	9.38641	9.01861	0.650058	0.00194466	0.02717	down	--	GO:0000139 Golgi membrane;GO:0010008 endosome membrane;GO:0016021 integral component of membrane	--	U: Intracellular trafficking, secretion, and vesicular transport	K17085	--	IPR004240: Nonaspanin (TM9SF);IPR036259: MFS transporter superfamily	Plasma membrane	--
Isoform0010874	pos:356-2173	--	0	0	0	0.0472926	0.0542469	0.0299613	inf	0	0	up	GO:0006468 protein phosphorylation	GO:0016021 integral component of membrane	GO:0004672 protein kinase activity;GO:0005524 ATP binding	--	K13415	ko04075: Plant hormone signal transduction	IPR011009: Protein kinase-like domain superfamily;IPR032675: Leucine-rich repeat domain superfamily;IPR013210: Leucine-rich repeat-containing N-terminal, plant-type;IPR000719: Protein kinase domain;IPR001611: Leucine-rich repeat;IPR001245: Serine-threonine/tyrosine-protein kinase, catalytic domain	vacuolar membrane	CS pos: 25-26. CYS-TV. Pr: 0.9484
Isoform0010933	pos:93-1967	--	0.0542004	0	0	0	0	0	0	0	0	down	GO:0045489 pectin biosynthetic process;GO:0071555 cell wall organization	GO:0000139 Golgi membrane	GO:0047262 polygalacturonate 4-alpha-galacturonosyltransferase activity	--	K13648	ko00520: Amino sugar and nucleotide sugar metabolism;ko01100: Metabolic pathways	IPR029044: Nucleotide-diphospho-sugar transferases;IPR029993: Plant galacturonosyltransferase GAUT;IPR002495: Glycosyl transferase, family 8	Mitochondrion	--
Isoform0010965	pos:57-1823	--	1.3935	1.28263	1.16845	0.787769	0.732544	0.804843	0.604787	0.00277016	0.0338336	down	--	--	GO:0003723 RNA binding;GO:0003724 RNA helicase activity;GO:0005524 ATP binding;GO:0016787 hydrolase activity	A: RNA processing and modification	K13179	--	IPR011545: DEAD/DEAH box helicase domain;IPR001650: Helicase, C-terminal;IPR014014: RNA helicase, DEAD-box type, Q motif;IPR027417: P-loop containing nucleoside triphosphate hydrolase;IPR014001: Helicase superfamily 1/2, ATP-binding domain;IPR000629: ATP-dependent RNA helicase DEAD-box, conserved site	chloroplast	--
Isoform0011035	pos:1185-2093	--	0.317097	0.412275	0.466743	1.90883	2.15199	1.90567	4.98822	0.00219819	0.0292772	up	--	--	--	R: General function prediction only	K00469	ko00053: Ascorbate and aldarate metabolism;ko00562: Inositol phosphate metabolism;ko01100: Metabolic pathways;ko01250: Biosynthesis of nucleotide sugars	IPR007828: Inositol oxygenase	Cytoplasm	--
Isoform0011129	pos:128-2113	--	0.640195	0.658904	0.620852	0.999602	0.976026	0.953467	1.52561	6.19835e-05	0.00601327	up	GO:0005975 carbohydrate metabolic process	GO:0005773 vacuole;GO:0016021 integral component of membrane	GO:0004564 beta-fructofuranosidase activity	G: Carbohydrate transport and metabolism	K01193	ko00052: Galactose metabolism;ko00500: Starch and sucrose metabolism;ko01100: Metabolic pathways;ko01110: Biosynthesis of secondary metabolites	IPR013320: Concanavalin A-like lectin/glucanase domain superfamily;IPR013148: Glycosyl hydrolase family 32, N-terminal;IPR023296: Glycosyl hydrolase, five-bladed beta-propellor domain superfamily;IPR021792: Beta-fructofuranosidase, N-terminal domain;IPR013189: Glycosyl hydrolase family 32, C-terminal;IPR001362: Glycoside hydrolase, family 32;IPR018053: Glycoside hydrolase, family 32, active site	Endoplasmic reticulum	--
Isoform0011153	pos:18-1868	--	1.03662	0.976421	0.992874	0.417354	0.386267	0.462694	0.421275	0.00158548	0.0250476	down	GO:0006400 tRNA modification	--	GO:0035596 methylthiotransferase activity;GO:0046872 metal ion binding;GO:0051539 4 iron, 4 sulfur cluster binding	T: Signal transduction mechanisms	K15865	--	IPR002792: TRAM domain;IPR006638: Elp3/MiaA/NifB-like, radical SAM core domain;IPR038135: Methylthiotransferase, N-terminal domain superfamily;IPR005839: Methylthiotransferase;IPR007197: Radical SAM;IPR013848: Methylthiotransferase, N-terminal;IPR006463: tRNA-2-methylthio-N(6)-dimethylallyladenosine synthase MiaB;IPR023404: Radical SAM, alpha/beta horseshoe;IPR020612: Methylthiotransferase, conse…	chloroplast	--
Isoform0011266	pos:171-1901	--	1.12483	1.01545	1.02403	0.697963	0.700626	0.693726	0.661224	0.00594882	0.0504624	down	--	--	--	--	--	--	IPR000048: IQ motif, EF-hand binding site;IPR025064: Domain of unknown function DUF4005	Nucleus	--
Isoform0011297	pos:126-2096	--	1.15849	1.14852	1.02154	3.27815	3.95923	3.80168	3.31648	0.000142503	0.00795344	up	--	--	--	--	K05349	ko00460: Cyanoamino acid metabolism;ko00500: Starch and sucrose metabolism;ko00999: Biosynthesis of various plant secondary metabolites;ko01100: Metabolic pathways;ko01110: Biosynthesis of secondary metabolites	IPR001764: Glycoside hydrolase, family 3, N-terminal;IPR002772: Glycoside hydrolase family 3 C-terminal domain;IPR036962: Glycoside hydrolase, family 3, N-terminal domain superfamily;IPR036881: Glycoside hydrolase family 3 C-terminal domain superfamily;IPR017853: Glycoside hydrolase superfamily	chloroplast	--
Isoform0011392	pos:34-1929	--	0.0394855	0	0	0	0	0	0	0	0	down	GO:0042254 ribosome biogenesis	--	GO:0005525 GTP binding	J: Translation, ribosomal structure and biogenesis	K03650	--	IPR015946: K homology domain-like, alpha/beta;IPR005225: Small GTP-binding protein domain;IPR032859: GTPase Der, C-terminal KH-domain-like;IPR027417: P-loop containing nucleoside triphosphate hydrolase;IPR006073: GTP binding domain;IPR016484: GTP-binding protein EngA	chloroplast	--
Isoform0011536	pos:247-2073	--	0.151335	0.148335	0.0874707	1.15994	0.966842	1.35023	8.98127	0.00150426	0.0243032	up	--	--	GO:0005524 ATP binding;GO:0016887 ATP hydrolysis activity	O: Posttranslational modification, protein turnover, chaperones	K03696	--	IPR027417: P-loop containing nucleoside triphosphate hydrolase;IPR019489: Clp ATPase, C-terminal;IPR003959: ATPase, AAA-type, core;IPR001270: ClpA/B family;IPR003593: AAA+ ATPase domain;IPR028299: ClpA/B, conserved site 2;IPR041546: ClpA/ClpB, AAA lid domain	chloroplast	--
Isoform0011568	pos:255-1937	--	0.306962	0.303985	0.267951	1.40001	1.21571	1.20774	4.35028	2.45455e-05	0.0037571	up	GO:0000272 polysaccharide catabolic process	--	GO:0016161 beta-amylase activity;GO:0102229 amylopectin maltohydrolase activity	--	K01177	ko00500: Starch and sucrose metabolism;ko01100: Metabolic pathways;ko01110: Biosynthesis of secondary metabolites	IPR001371: Glycoside hydrolase, family 14B, plant;IPR001554: Glycoside hydrolase, family 14;IPR018238: Glycoside hydrolase, family 14, conserved site;IPR017853: Glycoside hydrolase superfamily	chloroplast	--
Isoform0011605	pos:291-1847	--	0	0.0376444	0.0395968	0.11853	0.127445	0.129153	3.23772	0.000126132	0.007688	up	GO:0055062 phosphate ion homeostasis	GO:0016021 integral component of membrane	GO:0022857 transmembrane transporter activity	G: Carbohydrate transport and metabolism	K13783	--	IPR036259: MFS transporter superfamily;IPR000849: Sugar phosphate transporter;IPR011701: Major facilitator superfamily;IPR020846: Major facilitator superfamily domain	chloroplast	--
Isoform0011649	pos:31-1944	--	0.516847	0.592864	0.53911	0.218418	0.227505	0.206435	0.395651	0.000108469	0.00721083	down	--	--	--	--	--	--	IPR013584: RAP domain	chloroplast	--
Isoform0011700	pos:16-1956	--	0.861473	0.805672	0.84095	0.318091	0.310517	0.302198	0.37112	4.66715e-06	0.00160737	down	GO:0042254 ribosome biogenesis	--	GO:0005525 GTP binding	J: Translation, ribosomal structure and biogenesis	K03650	--	IPR027417: P-loop containing nucleoside triphosphate hydrolase;IPR016484: GTP-binding protein EngA;IPR015946: K homology domain-like, alpha/beta;IPR006073: GTP binding domain;IPR031166: EngA-type guanine nucleotide-binding (G) domain;IPR005225: Small GTP-binding protein domain;IPR032859: GTPase Der, C-terminal KH-domain-like	Mitochondrion	--
Isoform0011797	pos:256-1857	--	0.757932	0.863165	0.636106	0.300861	0.278319	0.293478	0.38661	0.00593346	0.0503942	down	--	GO:0016021 integral component of membrane	GO:0004497 monooxygenase activity;GO:0005506 iron ion binding;GO:0016705 oxidoreductase activity, acting on paired donors, with incorporation or reduction of molecular oxygen;GO:0020037 heme binding	Q: Secondary metabolites biosynthesis, transport and catabolism;I: Lipid transport and metabolism	K15398	ko00073: Cutin, suberine and wax biosynthesis;ko01100: Metabolic pathways	IPR036396: Cytochrome P450 superfamily;IPR001128: Cytochrome P450;IPR017972: Cytochrome P450, conserved site;IPR002401: Cytochrome P450, E-class, group I	chloroplast	--
Isoform0011806	pos:135-1874	--	0.562409	0.679821	0.581688	0.3912	0.349234	0.340929	0.592879	0.00275053	0.0337111	down	GO:0007010 cytoskeleton organization	--	GO:0008017 microtubule binding	--	--	--	IPR009768: Microtubule-associated protein 70	Cytoplasm	--
Isoform0011822	pos:162-1979	--	0	0	0	0.0519667	0	0	inf	0	0	up	GO:0051171 regulation of nitrogen compound metabolic process;GO:0060255 regulation of macromolecule metabolic process;GO:0080090 regulation of primary metabolic process	--	GO:0046872 metal ion binding	R: General function prediction only	--	--	IPR000571: Zinc finger, CCCH-type;IPR036770: Ankyrin repeat-containing domain superfamily;IPR002110: Ankyrin repeat;IPR045234: RING finger protein Unkempt-like	chloroplast	--
Isoform0011887	pos:181-2076	--	0.27609	0.184963	0.187566	0.523206	0.491925	0.508595	2.34919	0.0203501	0.0993421	up	--	GO:0000139 Golgi membrane;GO:0016021 integral component of membrane	GO:0016763 pentosyltransferase activity	S: Function unknown	--	--	IPR007657: Glycosyltransferase 61	chloroplast	--
Isoform0011904	pos:3-2069	--	46.2812	45.8504	45.4168	20.8647	19.4752	19.3191	0.433731	0.00051125	0.0155818	down	GO:0006559 L-phenylalanine catabolic process;GO:0009800 cinnamic acid biosynthetic process	GO:0005737 cytoplasm	GO:0045548 phenylalanine ammonia-lyase activity	Q: Secondary metabolites biosynthesis, transport and catabolism	K10775	ko00360: Phenylalanine metabolism;ko00940: Phenylpropanoid biosynthesis;ko01100: Metabolic pathways;ko01110: Biosynthesis of secondary metabolites	IPR008948: L-Aspartase-like;IPR005922: Phenylalanine ammonia-lyase;IPR001106: Aromatic amino acid lyase;IPR022313: Phenylalanine/histidine ammonia-lyases, active site;IPR023144: Phenylalanine ammonia-lyase, shielding domain superfamily;IPR024083: Fumarase/histidase, N-terminal	chloroplast	--
Isoform0011928	pos:144-1967	--	5.81104	5.94461	6.1722	2.49099	2.56752	2.59176	0.426725	8.16051e-06	0.00214061	down	GO:0009097 isoleucine biosynthetic process;GO:0009099 valine biosynthetic process;GO:0009635 response to herbicide	--	GO:0000287 magnesium ion binding;GO:0003984 acetolactate synthase activity;GO:0030976 thiamine pyrophosphate binding;GO:0050660 flavin adenine dinucleotide binding	E: Amino acid transport and metabolism;H: Coenzyme transport and metabolism	K01652	ko00290: Valine, leucine and isoleucine biosynthesis;ko00650: Butanoate metabolism;ko00660: C5-Branched dibasic acid metabolism;ko00770: Pantothenate and CoA biosynthesis;ko01100: Metabolic pathways;ko01110: Biosynthesis of secondary metabolites;ko01210: 2-Oxocarboxylic acid metabolism;ko01230: Biosynthesis of amino acids	IPR012846: Acetolactate synthase, large subunit, biosynthetic;IPR029035: DHS-like NAD/FAD-binding domain superfamily;IPR012001: Thiamine pyrophosphate enzyme, N-terminal TPP-binding domain;IPR045229: Thiamine pyrophosphate enzyme;IPR012000: Thiamine pyrophosphate enzyme, central domain;IPR029061: Thiamin diphosphate-binding fold;IPR039368: Acetolactate synthase large subunit, TPP binding domain;I…	Mitochondrion	--
Isoform0011966	pos:146-1036	--	5.48577	5.36926	6.10991	3.12414	2.80834	3.43793	0.55234	0.00184532	0.0267028	down	GO:0030154 cell differentiation	--	GO:0003729 mRNA binding	R: General function prediction only	K25006	--	IPR000504: RNA recognition motif domain;IPR012677: Nucleotide-binding alpha-beta plait domain superfamily;IPR035979: RNA-binding domain superfamily	Nucleus	--
Isoform0011973	pos:75-1931	--	0.285988	0.327661	0.37976	1.44981	1.37265	1.57911	4.43077	0.000566438	0.0156691	up	GO:0005975 carbohydrate metabolic process	--	GO:0004553 hydrolase activity, hydrolyzing O-glycosyl compounds	G: Carbohydrate transport and metabolism	K01193	ko00052: Galactose metabolism;ko00500: Starch and sucrose metabolism;ko01100: Metabolic pathways;ko01110: Biosynthesis of secondary metabolites	IPR013189: Glycosyl hydrolase family 32, C-terminal;IPR001362: Glycoside hydrolase, family 32;IPR013148: Glycosyl hydrolase family 32, N-terminal;IPR023296: Glycosyl hydrolase, five-bladed beta-propellor domain superfamily;IPR013320: Concanavalin A-like lectin/glucanase domain superfamily	Nucleus	--
Isoform0011974	pos:302-1969	--	1.67508	1.9572	2.17356	1.29786	1.32902	1.16022	0.652292	0.0148804	0.0829256	down	--	GO:0000139 Golgi membrane;GO:0016021 integral component of membrane	GO:0016763 pentosyltransferase activity	S: Function unknown	--	--	IPR007657: Glycosyltransferase 61	Plasma membrane	--
Isoform0011995	pos:229-1803	--	0.428484	0.58245	0.572026	1.15443	1.22001	1.06481	2.17267	0.00822596	0.0595798	up	--	--	--	--	--	--	IPR010820: UBA-like domain DUF1421	chloroplast	--
Isoform0012033	pos:252-1820	--	0	0	0	0	0.0138235	0	inf	0	0	up	GO:0006468 protein phosphorylation	--	GO:0004672 protein kinase activity;GO:0005524 ATP binding	T: Signal transduction mechanisms	K13414	ko04016: MAPK signaling pathway - plant;ko04626: Plant-pathogen interaction	IPR000719: Protein kinase domain;IPR011009: Protein kinase-like domain superfamily;IPR017441: Protein kinase, ATP binding site;IPR008271: Serine/threonine-protein kinase, active site	chloroplast	--
Isoform0012048	pos:4-2112	--	0.818923	0.885877	0.763444	0.548407	0.497898	0.470373	0.614477	0.0014341	0.0238236	down	GO:0006508 proteolysis	--	GO:0004252 serine-type endopeptidase activity	--	K25898	--	IPR041469: Subtilisin-like protease, fibronectin type-III domain;IPR034197: Cucumisin-like catalytic domain;IPR023828: Peptidase S8, subtilisin, Ser-active site;IPR000209: Peptidase S8/S53 domain;IPR036852: Peptidase S8/S53 domain superfamily;IPR037045: Peptidase S8 propeptide/proteinase inhibitor I9 superfamily;IPR015500: Peptidase S8, subtilisin-related;IPR003137: PA domain;IPR010259: Peptidase…	Cytoplasm	--
Isoform0012067	pos:110-2146	--	0.227521	0.277281	0.291755	1.32326	1.41755	1.38922	5.18484	0.00114425	0.0214756	up	GO:0006508 proteolysis	GO:0009534 chloroplast thylakoid;GO:0016020 membrane	GO:0004176 ATP-dependent peptidase activity;GO:0004222 metalloendopeptidase activity;GO:0005524 ATP binding;GO:0016887 ATP hydrolysis activity	O: Posttranslational modification, protein turnover, chaperones	K03798	--	IPR027417: P-loop containing nucleoside triphosphate hydrolase;IPR005936: Peptidase, FtsH;IPR041569: AAA ATPase, AAA+ lid domain;IPR037219: Peptidase M41-like;IPR003960: ATPase, AAA-type, conserved site;IPR003959: ATPase, AAA-type, core;IPR003593: AAA+ ATPase domain;IPR000642: Peptidase M41	chloroplast	--
Isoform0012081	pos:168-1787	--	2.30299	1.88531	1.88606	1.33444	1.17218	1.32271	0.63041	0.00726545	0.0559781	down	GO:0005975 carbohydrate metabolic process;GO:0009834 plant-type secondary cell wall biogenesis;GO:0010411 xyloglucan metabolic process;GO:0045492 xylan biosynthetic process;GO:1990937 xylan acetylation	GO:0005794 Golgi apparatus;GO:0016021 integral component of membrane	GO:0016407 acetyltransferase activity	R: General function prediction only	K03377	--	IPR012419: Cas1p 10 TM acyl transferase domain	Cytoplasm	--
Isoform0012088	pos:88-2049	--	2.59222	2.76774	2.50144	6.85982	6.62358	6.42832	2.53284	4.81078e-05	0.00549447	up	--	--	--	--	--	--	IPR011659: WD40-like beta propeller;IPR011042: Six-bladed beta-propeller, TolB-like	Cytoplasm	--
Isoform0012127	pos:60-2177	--	4.8836	4.28809	4.38116	18.482	16.8481	18.2718	3.95502	2.26753e-05	0.00363227	up	GO:0006098 pentose-phosphate shunt	GO:0005829 cytosol	GO:0004802 transketolase activity;GO:0046872 metal ion binding	G: Carbohydrate transport and metabolism	K00615	ko00030: Pentose phosphate pathway;ko00710: Carbon fixation in photosynthetic organisms;ko01100: Metabolic pathways;ko01110: Biosynthesis of secondary metabolites;ko01200: Carbon metabolism;ko01230: Biosynthesis of amino acids	IPR005475: Transketolase-like, pyrimidine-binding domain;IPR005474: Transketolase, N-terminal;IPR033248: Transketolase, C-terminal domain;IPR033247: Transketolase family;IPR029061: Thiamin diphosphate-binding fold;IPR005478: Transketolase, bacterial-like;IPR009014: Transketolase C-terminal/Pyruvate-ferredoxin oxidoreductase domain II	chloroplast	--
Isoform0012251	pos:2-1792	--	2.36849	2.44103	2.37255	0.870146	0.863555	0.941263	0.37245	0.000217831	0.0104039	down	GO:0016567 protein ubiquitination	--	--	--	--	--	IPR043454: NPH3/RPT2-like family;IPR000210: BTB/POZ domain;IPR027356: NPH3 domain;IPR011333: SKP1/BTB/POZ domain superfamily	Nucleus	--
Isoform0012285	pos:109-2124	--	0.322965	0.241165	0.21724	0.420773	0.445809	0.380386	1.59587	0.0418806	0.148928	up	GO:0005975 carbohydrate metabolic process	GO:0005773 vacuole;GO:0016021 integral component of membrane	GO:0004564 beta-fructofuranosidase activity	G: Carbohydrate transport and metabolism	K01193	ko00052: Galactose metabolism;ko00500: Starch and sucrose metabolism;ko01100: Metabolic pathways;ko01110: Biosynthesis of secondary metabolites	IPR018053: Glycoside hydrolase, family 32, active site;IPR001362: Glycoside hydrolase, family 32;IPR013189: Glycosyl hydrolase family 32, C-terminal;IPR021792: Beta-fructofuranosidase, N-terminal domain;IPR023296: Glycosyl hydrolase, five-bladed beta-propellor domain superfamily;IPR013148: Glycosyl hydrolase family 32, N-terminal;IPR013320: Concanavalin A-like lectin/glucanase domain superfamily	chloroplast	--
Isoform0012331	pos:792-2054	--	0	0	0	0	0.0413784	0.065181	inf	0	0	up	GO:0071704 organic substance metabolic process	GO:0005737 cytoplasm	GO:0004022 alcohol dehydrogenase (NAD+) activity;GO:0008270 zinc ion binding	Q: Secondary metabolites biosynthesis, transport and catabolism	K18857	ko00010: Glycolysis / Gluconeogenesis;ko00071: Fatty acid degradation;ko00350: Tyrosine metabolism;ko00592: alpha-Linolenic acid metabolism;ko00620: Pyruvate metabolism;ko01100: Metabolic pathways;ko01110: Biosynthesis of secondary metabolites	IPR013149: Alcohol dehydrogenase-like, C-terminal;IPR011032: GroES-like superfamily;IPR013154: Alcohol dehydrogenase, N-terminal;IPR036291: NAD(P)-binding domain superfamily	chloroplast	--
Isoform0012378	pos:85-588	--	0.0376983	0.0401455	0.0630401	0.296732	0.286149	0.251745	5.92422	0.00464529	0.0450659	up	--	--	--	--	--	--	--	Nucleus	--
Isoform0012419	pos:1-1956	--	0.125352	0.116451	0.117054	0.0643478	0.0460753	0.0449099	0.432855	0.01504	0.08341	down	GO:0009086 methionine biosynthetic process;GO:0032259 methylation	--	GO:0003871 5-methyltetrahydropteroyltriglutamate-homocysteine S-methyltransferase activity;GO:0008270 zinc ion binding	E: Amino acid transport and metabolism	K00549	ko00270: Cysteine and methionine metabolism;ko00450: Selenocompound metabolism;ko01100: Metabolic pathways;ko01110: Biosynthesis of secondary metabolites;ko01230: Biosynthesis of amino acids	IPR038071: UROD/MetE-like superfamily;IPR002629: Cobalamin-independent methionine synthase MetE, C-terminal/archaeal;IPR006276: Cobalamin-independent methionine synthase;IPR013215: Cobalamin-independent methionine synthase MetE, N-terminal	Cytoplasm	--
Isoform0012477	pos:2-1978	--	3.97175	3.87679	3.87559	1.96497	1.80214	1.89174	0.482668	0.000439366	0.0147627	down	GO:0006559 L-phenylalanine catabolic process;GO:0009800 cinnamic acid biosynthetic process	GO:0005737 cytoplasm	GO:0045548 phenylalanine ammonia-lyase activity	Q: Secondary metabolites biosynthesis, transport and catabolism	K10775	ko00360: Phenylalanine metabolism;ko00940: Phenylpropanoid biosynthesis;ko01100: Metabolic pathways;ko01110: Biosynthesis of secondary metabolites	IPR022313: Phenylalanine/histidine ammonia-lyases, active site;IPR024083: Fumarase/histidase, N-terminal;IPR001106: Aromatic amino acid lyase;IPR023144: Phenylalanine ammonia-lyase, shielding domain superfamily;IPR008948: L-Aspartase-like;IPR005922: Phenylalanine ammonia-lyase	chloroplast	--
Isoform0012488	pos:3-2021	--	0.891243	0.909947	0.957426	0.497668	0.566252	0.468327	0.55544	0.00415908	0.0423157	down	--	GO:0016021 integral component of membrane	GO:0005524 ATP binding;GO:0016887 ATP hydrolysis activity;GO:0019829 ATPase-coupled cation transmembrane transporter activity;GO:0046872 metal ion binding	P: Inorganic ion transport and metabolism	K17686	ko04016: MAPK signaling pathway - plant	IPR023298: P-type ATPase, transmembrane domain superfamily;IPR027256: P-type ATPase, subfamily IB;IPR018303: P-type ATPase, phosphorylation site;IPR023299: P-type ATPase, cytoplasmic domain N;IPR044492: P-type ATPase, haloacid dehalogenase domain;IPR036412: HAD-like superfamily;IPR008250: P-type ATPase, A domain superfamily;IPR023214: HAD superfamily;IPR001757: P-type ATPase	vacuolar membrane	--
Isoform0012493	pos:104-1573	--	0.38471	0.491309	0.510449	0.692404	0.728351	0.731329	1.55221	0.0329466	0.12953	up	--	GO:0016021 integral component of membrane	GO:0005524 ATP binding;GO:0140359 ABC-type transporter activity	Q: Secondary metabolites biosynthesis, transport and catabolism	K05681	ko02010: ABC transporters	IPR027417: P-loop containing nucleoside triphosphate hydrolase;IPR017871: ABC transporter-like, conserved site;IPR043926: ABC transporter family G domain;IPR003593: AAA+ ATPase domain;IPR003439: ABC transporter-like, ATP-binding domain;IPR013525: ABC-2 type transporter	chloroplast	--
Isoform0012520	pos:1-2112	--	0.260646	0.187707	0.289285	0.0856916	0.105457	0.128332	0.433113	0.00911834	0.0632498	down	--	GO:0016021 integral component of membrane	GO:0005524 ATP binding;GO:0140359 ABC-type transporter activity	Q: Secondary metabolites biosynthesis, transport and catabolism	K08711	ko02010: ABC transporters	IPR013525: ABC-2 type transporter;IPR013581: Plant PDR ABC transporter associated;IPR043926: ABC transporter family G domain;IPR027417: P-loop containing nucleoside triphosphate hydrolase;IPR003439: ABC transporter-like, ATP-binding domain;IPR003593: AAA+ ATPase domain;IPR034003: ATP-binding cassette transporter, PDR-like subfamily G, domain 2	Plasma membrane	--
Isoform0012528	pos:69-1850	--	3.83005	4.35777	4.03909	8.96779	9.3979	8.97774	2.23633	0.000571146	0.0156691	up	GO:0005975 carbohydrate metabolic process	--	GO:0004553 hydrolase activity, hydrolyzing O-glycosyl compounds	G: Carbohydrate transport and metabolism	K01193	ko00052: Galactose metabolism;ko00500: Starch and sucrose metabolism;ko01100: Metabolic pathways;ko01110: Biosynthesis of secondary metabolites	IPR013189: Glycosyl hydrolase family 32, C-terminal;IPR001362: Glycoside hydrolase, family 32;IPR023296: Glycosyl hydrolase, five-bladed beta-propellor domain superfamily;IPR013320: Concanavalin A-like lectin/glucanase domain superfamily;IPR013148: Glycosyl hydrolase family 32, N-terminal	chloroplast	CS pos: 24-25. SSS-LR. Pr: 0.3222
Isoform0012572	pos:258-1907	--	0.872539	0.753029	0.79509	0.464713	0.458707	0.464251	0.573262	0.00559879	0.0487541	down	--	--	GO:0005516 calmodulin binding	--	--	--	IPR025064: Domain of unknown function DUF4005;IPR000048: IQ motif, EF-hand binding site;IPR027417: P-loop containing nucleoside triphosphate hydrolase	Nucleus	--
Isoform0012602	pos:280-1740	--	0.0269093	0.0465802	0	0	0	0	0	0	0	down	GO:0045927 positive regulation of growth	--	--	--	--	--	IPR007700: Domain of unknown function DUF668;IPR021864: Domain of unknown function DUF3475	chloroplast	--
Isoform0012659	pos:398-1201	--	0.0816375	0.124104	0.193592	0.50354	0.531667	0.524767	3.90644	0.0288664	0.121759	up	--	GO:0016021 integral component of membrane	--	--	--	--	IPR002781: Transmembrane protein TauE-like	vacuolar membrane	--
Isoform0012664	pos:47-1324	--	0.0568348	0	0	0	0	0	0	0	0	down	GO:0006952 defense response	--	GO:0043531 ADP binding	T: Signal transduction mechanisms	K13457	ko04626: Plant-pathogen interaction	IPR027417: P-loop containing nucleoside triphosphate hydrolase;IPR032675: Leucine-rich repeat domain superfamily;IPR002182: NB-ARC;IPR036388: Winged helix-like DNA-binding domain superfamily;IPR044974: Disease resistance protein, plants	Cytoplasm	--
Isoform0012666	pos:951-2081	--	0.0524292	0	0.0599435	0	0	0	0	0	0	down	--	GO:0016021 integral component of membrane	GO:0004497 monooxygenase activity;GO:0005506 iron ion binding;GO:0016705 oxidoreductase activity, acting on paired donors, with incorporation or reduction of molecular oxygen;GO:0020037 heme binding	Q: Secondary metabolites biosynthesis, transport and catabolism	K11868	ko00380: Tryptophan metabolism;ko01100: Metabolic pathways	IPR017972: Cytochrome P450, conserved site;IPR001128: Cytochrome P450;IPR036396: Cytochrome P450 superfamily;IPR002401: Cytochrome P450, E-class, group I	Cytoplasm	--
Isoform0012667	pos:751-1434	--	0.315544	0.310611	0.274425	0.198955	0.161452	0.127694	0.541986	0.028787	0.121573	down	--	--	--	--	--	--	--	chloroplast	--
Isoform0012737	pos:139-1953	--	0.0675764	0	0	0	0	0	0	0	0	down	--	--	GO:0000287 magnesium ion binding;GO:0004737 pyruvate decarboxylase activity;GO:0030976 thiamine pyrophosphate binding	E: Amino acid transport and metabolism;H: Coenzyme transport and metabolism	K01568	ko00010: Glycolysis / Gluconeogenesis;ko01100: Metabolic pathways;ko01110: Biosynthesis of secondary metabolites	IPR012000: Thiamine pyrophosphate enzyme, central domain;IPR012110: Thiamine pyrophosphate (TPP)-dependent enzyme;IPR011766: Thiamine pyrophosphate enzyme, C-terminal TPP-binding;IPR029061: Thiamin diphosphate-binding fold;IPR029035: DHS-like NAD/FAD-binding domain superfamily;IPR012001: Thiamine pyrophosphate enzyme, N-terminal TPP-binding domain	Cytoplasm	--
Isoform0012744	pos:1-1884	--	0.194555	0.212302	0.205138	0.328648	0.31204	0.308635	1.5512	0.000244151	0.0108897	up	GO:0006417 regulation of translation	--	GO:0003723 RNA binding	J: Translation, ribosomal structure and biogenesis	K17943	--	IPR001313: Pumilio RNA-binding repeat;IPR033133: Pumilio homology domain;IPR033712: Pumilio, RNA binding domain;IPR016024: Armadillo-type fold;IPR011989: Armadillo-like helical	Nucleus	--
Isoform0012768	pos:337-1389	--	0.156016	0.194504	0.261256	0.543094	0.500107	0.437772	2.42078	0.0152146	0.0840405	up	GO:0009939 positive regulation of gibberellic acid mediated signaling pathway;GO:0010325 raffinose family oligosaccharide biosynthetic process;GO:0048444 floral organ morphogenesis	GO:0005634 nucleus;GO:0005737 cytoplasm	GO:0010331 gibberellin binding;GO:0016787 hydrolase activity	V: Defense mechanisms	K14493	ko04075: Plant hormone signal transduction	IPR029058: Alpha/Beta hydrolase fold;IPR013094: Alpha/beta hydrolase fold-3;IPR033140: Lipase, GDXG, putative serine active site	Cytoplasm	--
Isoform0012777	pos:206-1693	--	0.104392	0.107125	0.0539653	0	0	0	0	0	0	down	GO:0045489 pectin biosynthetic process;GO:0071555 cell wall organization	GO:0000139 Golgi membrane	GO:0047262 polygalacturonate 4-alpha-galacturonosyltransferase activity	--	K13648	ko00520: Amino sugar and nucleotide sugar metabolism;ko01100: Metabolic pathways	IPR002495: Glycosyl transferase, family 8;IPR029044: Nucleotide-diphospho-sugar transferases;IPR029993: Plant galacturonosyltransferase GAUT	Cytoplasm	--
Isoform0012793	pos:150-1901	--	1.75642	1.46667	1.54802	0.998141	1.06941	1.10564	0.665082	0.00599676	0.0506197	down	--	GO:0016021 integral component of membrane	GO:0022857 transmembrane transporter activity	E: Amino acid transport and metabolism	K26552	--	IPR036259: MFS transporter superfamily;IPR000109: Proton-dependent oligopeptide transporter family	Plasma membrane	--
Isoform0012852	pos:37-2067	--	0.0897406	0.0514492	0.086469	0	0	0	0	0	0	down	--	--	--	--	K14494	ko04075: Plant hormone signal transduction	IPR005202: Transcription factor GRAS	Cytoplasm	--
Isoform0012885	pos:29-1684	--	1.20187	1.04976	1.10408	0.683466	0.680421	0.709147	0.617764	0.00347684	0.0387648	down	--	GO:0005737 cytoplasm	GO:0005525 GTP binding;GO:0043022 ribosome binding;GO:0046872 metal ion binding	R: General function prediction only	K03665	--	IPR027417: P-loop containing nucleoside triphosphate hydrolase;IPR006073: GTP binding domain;IPR016496: GTPase HflX;IPR005225: Small GTP-binding protein domain;IPR042108: GTPase HflX, N-terminal domain superfamily;IPR030394: HflX-type guanine nucleotide-binding (G) domain;IPR025121: GTPase HflX, N-terminal;IPR032305: GTP-binding protein, middle domain	chloroplast	--
Isoform0012905	pos:44-1693	--	0.550192	0.514242	0.563388	0.21523	0.230719	0.181838	0.385661	0.00215505	0.0289194	down	--	GO:0009507 chloroplast	GO:0005506 iron ion binding;GO:0010277 chlorophyllide a oxygenase [overall] activity;GO:0051537 2 iron, 2 sulfur cluster binding	--	K13600	ko00860: Porphyrin metabolism;ko01100: Metabolic pathways;ko01110: Biosynthesis of secondary metabolites	IPR044043: Vanillate O-demethylase oxygenase-like, C-terminal catalytic domain;IPR015881: Aromatic-ring-hydroxylating dioxygenase, 2Fe-2S-binding site;IPR036922: Rieske [2Fe-2S] iron-sulphur domain superfamily;IPR017941: Rieske [2Fe-2S] iron-sulphur domain;IPR013626: Pheophorbide a oxygenase	chloroplast	--
Isoform0012936	pos:4-1647	--	1.49199	1.32576	1.46606	0.828707	0.858254	0.743707	0.567408	0.000633163	0.0162127	down	--	GO:0016021 integral component of membrane	GO:0005351 carbohydrate:proton symporter activity	R: General function prediction only	K08150	--	IPR005828: Major facilitator, sugar transporter-like;IPR036259: MFS transporter superfamily;IPR003663: Sugar/inositol transporter;IPR020846: Major facilitator superfamily domain;IPR005829: Sugar transporter, conserved site;IPR045262: Sugar transport protein STP/Polyol transporter PLT, plant	Plasma membrane	--
Isoform0012961	pos:185-1912	--	0.785339	0.70537	0.726566	0.356478	0.374832	0.430787	0.52411	0.00171826	0.0257314	down	--	GO:0005730 nucleolus	GO:0005525 GTP binding	R: General function prediction only	K14538	ko03008: Ribosome biogenesis in eukaryotes	IPR030378: Circularly permuted (CP)-type guanine nucleotide-binding (G) domain;IPR014813: Guanine nucleotide-binding protein-like 3, N-terminal domain;IPR006073: GTP binding domain;IPR027417: P-loop containing nucleoside triphosphate hydrolase;IPR023179: GTP-binding protein, orthogonal bundle domain superfamily	Nucleus	--
Isoform0012970	pos:37-1995	--	0.721166	0.68491	0.670094	0.417237	0.436905	0.411294	0.609505	7.89241e-05	0.00654975	down	--	--	GO:0003723 RNA binding;GO:0003724 RNA helicase activity;GO:0005524 ATP binding;GO:0016787 hydrolase activity	A: RNA processing and modification	K13179	--	IPR001650: Helicase, C-terminal;IPR027417: P-loop containing nucleoside triphosphate hydrolase;IPR014001: Helicase superfamily 1/2, ATP-binding domain;IPR011545: DEAD/DEAH box helicase domain;IPR014014: RNA helicase, DEAD-box type, Q motif	chloroplast	--
Isoform0013012	pos:177-1703	--	0.253401	0.236736	0.241001	0.134436	0.14637	0.172528	0.620039	0.0165545	0.0874445	down	GO:0006468 protein phosphorylation	GO:0016021 integral component of membrane	GO:0004674 protein serine/threonine kinase activity;GO:0005524 ATP binding	--	K13430	ko04626: Plant-pathogen interaction	IPR002902: Gnk2-homologous domain;IPR000719: Protein kinase domain;IPR038408: Gnk2-homologous domain superfamily;IPR017441: Protein kinase, ATP binding site;IPR011009: Protein kinase-like domain superfamily;IPR008271: Serine/threonine-protein kinase, active site	chloroplast	CS pos: 19-20. TQA-AA. Pr: 0.4335
Isoform0013021	pos:166-1890	--	0.156215	0.100125	0.124883	0.0737107	0.0621376	0.0726925	0.54703	0.0297112	0.123209	down	GO:0032259 methylation;GO:0042546 cell wall biogenesis;GO:0052546 cell wall pectin metabolic process	GO:0000139 Golgi membrane;GO:0016021 integral component of membrane	GO:0008757 S-adenosylmethionine-dependent methyltransferase activity	--	K23872	--	IPR004159: Putative S-adenosyl-L-methionine-dependent methyltransferase;IPR029063: S-adenosyl-L-methionine-dependent methyltransferase superfamily	chloroplast	--
Isoform0013066	pos:132-1892	--	0.277037	0.246974	0.176434	0.487398	0.399594	0.384415	1.81514	0.0275184	0.118541	up	--	GO:0016021 integral component of membrane	GO:0022857 transmembrane transporter activity	E: Amino acid transport and metabolism	K26548	--	IPR036259: MFS transporter superfamily;IPR000109: Proton-dependent oligopeptide transporter family	Plasma membrane	--
Isoform0013069	pos:75-1760	--	0.785548	0.850089	0.845394	1.28761	1.34901	1.31314	1.59198	0.000475289	0.0150866	up	GO:0009698 phenylpropanoid metabolic process	--	GO:0016207 4-coumarate-CoA ligase activity;GO:0106290 trans-cinnamate-CoA ligase activity	I: Lipid transport and metabolism	K01913	ko00010: Glycolysis / Gluconeogenesis;ko00620: Pyruvate metabolism;ko00630: Glyoxylate and dicarboxylate metabolism;ko00650: Butanoate metabolism;ko01100: Metabolic pathways;ko01110: Biosynthesis of secondary metabolites;ko01200: Carbon metabolism	IPR025110: AMP-binding enzyme, C-terminal domain;IPR042099: ANL, N-terminal domain;IPR000873: AMP-dependent synthetase/ligase;IPR020845: AMP-binding, conserved site;IPR045851: AMP-binding enzyme, C-terminal domain superfamily	Peroxisome	--
Isoform0013087	pos:117-1943	--	0.622577	0.628638	0.620498	0.189771	0.204557	0.165835	0.299278	0.00247916	0.0317407	down	--	--	--	R: General function prediction only	--	--	IPR002885: Pentatricopeptide repeat;IPR011990: Tetratricopeptide-like helical domain superfamily	Nucleus	--
Isoform0013117	pos:252-1811	--	0.914969	0.802595	0.792199	0.61092	0.492927	0.50358	0.640469	0.00801007	0.0591826	down	GO:0042254 ribosome biogenesis	--	GO:0003924 GTPase activity;GO:0005525 GTP binding	R: General function prediction only	K06944	--	IPR006169: GTP1/OBG domain;IPR027417: P-loop containing nucleoside triphosphate hydrolase;IPR045086: OBG-type GTPase;IPR036726: GTP1/OBG domain superfamily;IPR031167: OBG-type guanine nucleotide-binding (G) domain;IPR006073: GTP binding domain;IPR014100: GTP-binding protein Obg/CgtA	chloroplast	--
Isoform0013135	pos:309-1838	--	0.0980936	0.165815	0.109208	0	0	0	0	0	0	down	--	GO:0016021 integral component of membrane	GO:0015293 symporter activity	R: General function prediction only	K08150	--	IPR036259: MFS transporter superfamily;IPR020846: Major facilitator superfamily domain;IPR005828: Major facilitator, sugar transporter-like	Plasma membrane	--
Isoform0013141	pos:208-1938	--	0.779265	0.816557	0.812927	0.325163	0.290942	0.366852	0.408078	0.00394966	0.0412201	down	--	--	GO:0003724 RNA helicase activity;GO:0003729 mRNA binding;GO:0005524 ATP binding;GO:0016787 hydrolase activity	A: RNA processing and modification	K13179	--	IPR014001: Helicase superfamily 1/2, ATP-binding domain;IPR001650: Helicase, C-terminal;IPR027417: P-loop containing nucleoside triphosphate hydrolase;IPR011545: DEAD/DEAH box helicase domain;IPR014014: RNA helicase, DEAD-box type, Q motif	Nucleus	--
Isoform0013151	pos:297-1814	--	0.234673	0.2339	0.364127	1.28299	1.05841	1.09789	4.13029	0.00469647	0.0452377	up	GO:0015996 chlorophyll catabolic process	--	GO:0080124 pheophytinase activity	R: General function prediction only	--	--	IPR029058: Alpha/Beta hydrolase fold;IPR000073: Alpha/beta hydrolase fold-1;IPR044211: Pheophytinase, chloroplastic	chloroplast	--
Isoform0013177	pos:88-1584	--	0.307603	0.176202	0.260182	0.725763	0.758494	0.728661	2.9744	0.0205485	0.099779	up	--	GO:0016021 integral component of membrane	--	R: General function prediction only	K13606	ko00860: Porphyrin metabolism;ko01100: Metabolic pathways;ko01110: Biosynthesis of secondary metabolites	IPR002347: Short-chain dehydrogenase/reductase SDR;IPR036291: NAD(P)-binding domain superfamily	Plasma membrane	--
Isoform0013243	pos:92-1651	--	0.69752	0.67828	0.673074	0.425607	0.474519	0.348111	0.60923	0.029489	0.123005	down	--	--	--	--	--	--	--	chloroplast	--
Isoform0013268	pos:4-1839	--	0.501638	0.558678	0.538529	3.27951	3.19201	3.32808	6.12918	5.23131e-05	0.00549447	up	GO:0006090 pyruvate metabolic process;GO:0006108 malate metabolic process	GO:0009507 chloroplast	GO:0004470 malic enzyme activity;GO:0004471 malate dehydrogenase (decarboxylating) (NAD+) activity;GO:0004473 malate dehydrogenase (decarboxylating) (NADP+) activity;GO:0046872 metal ion binding;GO:0051287 NAD binding	C: Energy production and conversion	K00029	ko00620: Pyruvate metabolism;ko00710: Carbon fixation in photosynthetic organisms;ko01100: Metabolic pathways;ko01200: Carbon metabolism	IPR001891: Malic oxidoreductase;IPR012302: Malic enzyme, NAD-binding;IPR012301: Malic enzyme, N-terminal domain;IPR036291: NAD(P)-binding domain superfamily;IPR015884: Malic enzyme, conserved site;IPR037062: Malic enzyme, N-terminal domain superfamily;IPR046346: Aminoacid dehydrogenase-like, N-terminal domain superfamily	chloroplast	--
Isoform0013313	pos:4-384	--	0	0.0361891	0	0	0	0	0	0	0	down	--	--	GO:0005344 oxygen carrier activity;GO:0019825 oxygen binding;GO:0020037 heme binding	--	--	--	IPR001486: Truncated hemoglobin;IPR044203: Group 2 truncated hemoglobin GlbO/Two-on-two hemoglobin-3-like;IPR012292: Globin/Protoglobin;IPR009050: Globin-like superfamily	Nucleus	--
Isoform0013315	pos:54-1763	--	1.32143	1.43046	1.51301	0.928127	0.968755	0.830771	0.639559	0.00192618	0.0271396	down	GO:0000304 response to singlet oxygen;GO:0010343 singlet oxygen-mediated programmed cell death	GO:0042651 thylakoid membrane	--	--	--	--	IPR044680: Protein EXECUTER 1/2	Cytoplasm	--
Isoform0013334	pos:465-1736	--	1.65501	1.16834	1.50384	0.670357	0.53891	0.581066	0.41374	0.0039032	0.0409836	down	GO:0016117 carotenoid biosynthetic process	GO:0010287 plastoglobule	GO:0004311 farnesyltranstransferase activity;GO:0016767 geranylgeranyl-diphosphate geranylgeranyltransferase activity;GO:0046905 15-cis-phytoene synthase activity	I: Lipid transport and metabolism	K02291	ko00906: Carotenoid biosynthesis;ko01100: Metabolic pathways;ko01110: Biosynthesis of secondary metabolites	IPR002060: Squalene/phytoene synthase;IPR008949: Isoprenoid synthase domain superfamily;IPR044843: Trans-isoprenyl diphosphate synthases, bacterial-type;IPR019845: Squalene/phytoene synthase, conserved site;IPR033904: Trans-isoprenyl diphosphate synthases, head-to-head	chloroplast	--
Isoform0013343	pos:269-1579	--	2.08174	2.27748	2.37738	1.37318	1.47195	1.29397	0.614421	0.000847859	0.0188419	down	--	--	--	E: Amino acid transport and metabolism	K01653	ko00290: Valine, leucine and isoleucine biosynthesis;ko00650: Butanoate metabolism;ko00660: C5-Branched dibasic acid metabolism;ko00770: Pantothenate and CoA biosynthesis;ko01100: Metabolic pathways;ko01110: Biosynthesis of secondary metabolites;ko01210: 2-Oxocarboxylic acid metabolism;ko01230: Biosynthesis of amino acids	IPR002912: ACT domain;IPR004789: Acetolactate synthase, small subunit;IPR045865: ACT-like domain;IPR039557: AHAS, ACT domain;IPR027271: Acetolactate synthase/Transcription factor NikR, C-terminal;IPR019455: Acetolactate synthase, small subunit, C-terminal	chloroplast	--
Isoform0013389	pos:89-1813	--	1.41408	1.31539	1.48948	2.92414	2.55574	2.9024	1.98682	0.000326381	0.0126298	up	GO:0009698 phenylpropanoid metabolic process	--	GO:0016207 4-coumarate-CoA ligase activity;GO:0106290 trans-cinnamate-CoA ligase activity	I: Lipid transport and metabolism	K01904	ko00130: Ubiquinone and other terpenoid-quinone biosynthesis;ko00940: Phenylpropanoid biosynthesis;ko01100: Metabolic pathways;ko01110: Biosynthesis of secondary metabolites	IPR042099: ANL, N-terminal domain;IPR020845: AMP-binding, conserved site;IPR025110: AMP-binding enzyme, C-terminal domain;IPR045851: AMP-binding enzyme, C-terminal domain superfamily;IPR000873: AMP-dependent synthetase/ligase	Plasma membrane	--
Isoform0013422	pos:61-1890	--	0.0931689	0.0627046	0.0549197	0.0186808	0.0223562	0.0421393	0.394588	0.037907	0.140611	down	--	GO:0016021 integral component of membrane	GO:0003824 catalytic activity	J: Translation, ribosomal structure and biogenesis	K02433	ko00970: Aminoacyl-tRNA biosynthesis;ko01100: Metabolic pathways	IPR023631: Amidase signature domain;IPR000120: Amidase;IPR036928: Amidase signature (AS) superfamily	Endoplasmic reticulum	--
Isoform0013483	pos:191-1849	--	0.0380287	0	0.066488	0	0	0	0	0	0	down	--	--	--	--	--	--	IPR009291: Vacuolar protein sorting-associated protein 62	Cytoskeleton	--
Isoform0013493	pos:118-1827	--	4.32275	4.00833	4.07135	2.80173	2.78367	2.60112	0.660074	0.000232759	0.0106883	down	GO:0006096 glycolytic process	GO:0005737 cytoplasm;GO:0009570 chloroplast stroma	GO:0000287 magnesium ion binding;GO:0004743 pyruvate kinase activity;GO:0005524 ATP binding;GO:0016301 kinase activity;GO:0030955 potassium ion binding	G: Carbohydrate transport and metabolism	K00873	ko00010: Glycolysis / Gluconeogenesis;ko00620: Pyruvate metabolism;ko01100: Metabolic pathways;ko01110: Biosynthesis of secondary metabolites;ko01200: Carbon metabolism;ko01230: Biosynthesis of amino acids	IPR036918: Pyruvate kinase, C-terminal domain superfamily;IPR040442: Pyruvate kinase-like domain superfamily;IPR001697: Pyruvate kinase;IPR015793: Pyruvate kinase, barrel;IPR018209: Pyruvate kinase, active site;IPR015806: Pyruvate kinase, insert domain superfamily;IPR015813: Pyruvate/Phosphoenolpyruvate kinase-like domain superfamily;IPR015795: Pyruvate kinase, C-terminal;IPR011037: Pyruvate kina…	chloroplast	--
Isoform0013534	pos:48-1943	--	0.973202	0.650319	0.627104	0.380187	0.492698	0.365721	0.550339	0.0321594	0.127973	down	GO:0006468 protein phosphorylation	GO:0016021 integral component of membrane	GO:0004672 protein kinase activity;GO:0005524 ATP binding;GO:0030247 polysaccharide binding	--	K13416	ko04016: MAPK signaling pathway - plant;ko04075: Plant hormone signal transduction;ko04626: Plant-pathogen interaction	IPR045874: Rust resistance kinase Lr10;IPR008271: Serine/threonine-protein kinase, active site;IPR000719: Protein kinase domain;IPR017441: Protein kinase, ATP binding site;IPR011009: Protein kinase-like domain superfamily	Plasma membrane	CS pos: 24-25. ATA-WD. Pr: 0.7620
Isoform0013555	pos:127-1791	--	0	0.393251	0.332174	0.993822	0.73815	0.733267	2.26556	0.00925733	0.0638922	up	GO:0006529 asparagine biosynthetic process;GO:0006541 glutamine metabolic process	--	GO:0004066 asparagine synthase (glutamine-hydrolyzing) activity;GO:0005524 ATP binding	E: Amino acid transport and metabolism	K01953	ko00250: Alanine, aspartate and glutamate metabolism;ko01100: Metabolic pathways;ko01110: Biosynthesis of secondary metabolites;ko01230: Biosynthesis of amino acids	IPR033738: Asparagine synthase, N-terminal domain;IPR014729: Rossmann-like alpha/beta/alpha sandwich fold;IPR001962: Asparagine synthase;IPR029055: Nucleophile aminohydrolases, N-terminal;IPR017932: Glutamine amidotransferase type 2 domain;IPR006426: Asparagine synthase, glutamine-hydrolyzing	Mitochondrion	--
Isoform0013574	pos:2-1978	--	1.16368	1.00262	0.897729	1.69091	1.49537	1.58933	1.5586	0.0142656	0.081141	up	GO:0034220 ion transmembrane transport;GO:0051453 regulation of intracellular pH;GO:0120029 proton export across plasma membrane;GO:1902600 proton transmembrane transport	GO:0005886 plasma membrane;GO:0016021 integral component of membrane	GO:0005524 ATP binding;GO:0008553 P-type proton-exporting transporter activity;GO:0015662 P-type ion transporter activity;GO:0016887 ATP hydrolysis activity	P: Inorganic ion transport and metabolism	K01535	ko00190: Oxidative phosphorylation;ko01100: Metabolic pathways	IPR001757: P-type ATPase;IPR036412: HAD-like superfamily;IPR044492: P-type ATPase, haloacid dehalogenase domain;IPR018303: P-type ATPase, phosphorylation site;IPR023214: HAD superfamily;IPR023299: P-type ATPase, cytoplasmic domain N;IPR023298: P-type ATPase, transmembrane domain superfamily;IPR006534: P-type ATPase, subfamily IIIA	Plasma membrane	--
Isoform0013591	pos:378-1835	--	1.21838	1.13348	0.982635	0.313658	0.394959	0.340196	0.314535	0.000240301	0.0108183	down	GO:0006782 protoporphyrinogen IX biosynthetic process	--	GO:0008883 glutamyl-tRNA reductase activity;GO:0050661 NADP binding	--	K02492	ko00860: Porphyrin metabolism;ko01100: Metabolic pathways;ko01110: Biosynthesis of secondary metabolites;ko01240: Biosynthesis of cofactors	IPR015896: Tetrapyrrole biosynthesis, glutamyl-tRNA reductase, dimerisation domain;IPR000343: Glutamyl-tRNA reductase;IPR036453: Glutamyl tRNA-reductase dimerization domain superfamily;IPR015895: Glutamyl-tRNA reductase, N-terminal;IPR036343: Glutamyl-tRNA reductase, N-terminal domain superfamily;IPR036291: NAD(P)-binding domain superfamily;IPR018214: Glutamyl-tRNA reductase, conserved site;IPR00…	Cytoplasm	--
Isoform0013668	pos:25-1989	--	0.812126	0.886094	0.866083	0.48533	0.489926	0.503633	0.576721	0.00055989	0.0156691	down	GO:0006364 rRNA processing	GO:0005737 cytoplasm;GO:0005840 ribosome	GO:0043022 ribosome binding	M: Cell wall/membrane/envelope biogenesis	--	--	IPR011961: 16S rRNA processing protein RimM;IPR027275: PRC-barrel domain;IPR009000: Translation protein, beta-barrel domain superfamily;IPR002676: RimM, N-terminal;IPR036976: RimM, N-terminal domain superfamily;IPR039741: UDP-sugar pyrophosphorylase;IPR029044: Nucleotide-diphospho-sugar transferases;IPR011033: PRC-barrel-like superfamily	chloroplast	--
Isoform0013717	pos:111-1793	--	6.96373	6.66425	7.01508	2.65285	2.89562	2.66245	0.397757	6.99117e-05	0.00634604	down	GO:0006096 glycolytic process	GO:0005737 cytoplasm;GO:0009570 chloroplast stroma	GO:0000287 magnesium ion binding;GO:0004743 pyruvate kinase activity;GO:0005524 ATP binding;GO:0016301 kinase activity;GO:0030955 potassium ion binding	G: Carbohydrate transport and metabolism	K00873	ko00010: Glycolysis / Gluconeogenesis;ko00620: Pyruvate metabolism;ko01100: Metabolic pathways;ko01110: Biosynthesis of secondary metabolites;ko01200: Carbon metabolism;ko01230: Biosynthesis of amino acids	IPR036918: Pyruvate kinase, C-terminal domain superfamily;IPR001697: Pyruvate kinase;IPR015795: Pyruvate kinase, C-terminal;IPR015806: Pyruvate kinase, insert domain superfamily;IPR011037: Pyruvate kinase-like, insert domain superfamily;IPR015793: Pyruvate kinase, barrel;IPR040442: Pyruvate kinase-like domain superfamily;IPR018209: Pyruvate kinase, active site;IPR015813: Pyruvate/Phosphoenolpyruv…	chloroplast	--
Isoform0013726	pos:395-1831	--	0.337342	0.411305	0.394535	0.234795	0.205219	0.207251	0.566196	0.00232015	0.0301532	down	--	--	--	--	--	--	IPR025064: Domain of unknown function DUF4005;IPR000048: IQ motif, EF-hand binding site	Nucleus	--
Isoform0013756	pos:2-1687	--	0.600402	0.475231	0.558203	0.353216	0.368722	0.358392	0.661223	0.024247	0.110554	down	GO:0045489 pectin biosynthetic process;GO:0071555 cell wall organization	GO:0000139 Golgi membrane	GO:0047262 polygalacturonate 4-alpha-galacturonosyltransferase activity	--	K13648	ko00520: Amino sugar and nucleotide sugar metabolism;ko01100: Metabolic pathways	IPR002495: Glycosyl transferase, family 8;IPR029044: Nucleotide-diphospho-sugar transferases;IPR029993: Plant galacturonosyltransferase GAUT	chloroplast	--
Isoform0013897	pos:3-1769	--	3.6244	3.43987	3.41331	5.77677	5.63113	5.33461	1.59794	0.000134557	0.00787261	up	GO:0009698 phenylpropanoid metabolic process	--	GO:0016207 4-coumarate-CoA ligase activity;GO:0106290 trans-cinnamate-CoA ligase activity	I: Lipid transport and metabolism	K01913	ko00010: Glycolysis / Gluconeogenesis;ko00620: Pyruvate metabolism;ko00630: Glyoxylate and dicarboxylate metabolism;ko00650: Butanoate metabolism;ko01100: Metabolic pathways;ko01110: Biosynthesis of secondary metabolites;ko01200: Carbon metabolism	IPR020845: AMP-binding, conserved site;IPR045851: AMP-binding enzyme, C-terminal domain superfamily;IPR000873: AMP-dependent synthetase/ligase;IPR025110: AMP-binding enzyme, C-terminal domain;IPR042099: ANL, N-terminal domain	chloroplast	--
Isoform0013916	pos:252-1778	--	7.23041	7.77951	6.29371	29.2341	30.5031	33.6077	4.38164	0.000106105	0.00721083	up	--	--	GO:0004029 aldehyde dehydrogenase (NAD+) activity;GO:0043878 glyceraldehyde-3-phosphate dehydrogenase (NAD+) (non-phosphorylating) activity	C: Energy production and conversion	K14085	ko00010: Glycolysis / Gluconeogenesis;ko00053: Ascorbate and aldarate metabolism;ko00071: Fatty acid degradation;ko00260: Glycine, serine and threonine metabolism;ko00280: Valine, leucine and isoleucine degradation;ko00310: Lysine degradation;ko00330: Arginine and proline metabolism;ko00340: Histidine metabolism;ko00380: Tryptophan metabolism;ko00410: beta-Alanine metabolism;ko00561: Glycerolipid…	IPR015590: Aldehyde dehydrogenase domain;IPR016161: Aldehyde/histidinol dehydrogenase;IPR029510: Aldehyde dehydrogenase, glutamic acid active site;IPR044638: Aldehyde dehydrogenase family 7 member A1-like;IPR016162: Aldehyde dehydrogenase, N-terminal;IPR016163: Aldehyde dehydrogenase, C-terminal	chloroplast	--
Isoform0013931	pos:6-1790	--	0.0498162	0.0773399	0	0	0	0	0	0	0	down	--	GO:0016021 integral component of membrane	GO:0015293 symporter activity	R: General function prediction only	K08150	--	IPR003663: Sugar/inositol transporter;IPR036259: MFS transporter superfamily;IPR020846: Major facilitator superfamily domain;IPR005829: Sugar transporter, conserved site;IPR005828: Major facilitator, sugar transporter-like	chloroplast	--
Isoform0013979	pos:55-1806	--	0.172849	0.156024	0.146748	0.229627	0.258743	0.257796	1.56883	0.00215804	0.0289194	up	GO:0005975 carbohydrate metabolic process	--	GO:0004553 hydrolase activity, hydrolyzing O-glycosyl compounds	G: Carbohydrate transport and metabolism	K01193	ko00052: Galactose metabolism;ko00500: Starch and sucrose metabolism;ko01100: Metabolic pathways;ko01110: Biosynthesis of secondary metabolites	IPR013189: Glycosyl hydrolase family 32, C-terminal;IPR023296: Glycosyl hydrolase, five-bladed beta-propellor domain superfamily;IPR013320: Concanavalin A-like lectin/glucanase domain superfamily;IPR013148: Glycosyl hydrolase family 32, N-terminal;IPR001362: Glycoside hydrolase, family 32	chloroplast	CS pos: 24-25. SSS-LR. Pr: 0.4484
Isoform0014024	pos:110-1849	--	0.423945	0.413852	0.454347	0.873285	0.826208	0.882983	1.9986	7.03785e-05	0.00634604	up	GO:0009408 response to heat	--	GO:0005524 ATP binding;GO:0140662 ATP-dependent protein folding chaperone	O: Posttranslational modification, protein turnover, chaperones	K09489	--	IPR013126: Heat shock protein 70 family;IPR043129: ATPase, nucleotide binding domain;IPR029047: Heat shock protein 70kD, peptide-binding domain superfamily;IPR018181: Heat shock protein 70, conserved site	Cytoplasm	--
Isoform0014043	pos:210-1946	--	1.20592	1.4867	1.47683	2.17193	2.08688	2.16946	1.54175	0.0206743	0.100003	up	--	GO:0016021 integral component of membrane;GO:0031969 chloroplast membrane	GO:0008237 metallopeptidase activity	--	K25380	--	IPR044838: Probable metalloprotease EGY1-like	Plasma membrane	--
Isoform0014051	pos:3-1637	--	0.783199	0.484452	0.41824	1.30187	1.3752	1.52468	2.49231	0.031641	0.127377	up	GO:0006865 amino acid transport	GO:0016021 integral component of membrane	GO:0015171 amino acid transmembrane transporter activity	E: Amino acid transport and metabolism	K13863	--	IPR029485: Cationic amino acid transporter, C-terminal;IPR002293: Amino acid/polyamine transporter I	chloroplast	--
Isoform0014080	pos:151-1410	--	1.1742	1.13782	1.10859	2.77448	2.71425	2.95374	2.46812	2.74213e-05	0.00410605	up	--	--	--	--	--	--	--	chloroplast	--
Isoform0014084	pos:121-1791	--	2.01265	2.10565	2.12653	1.49953	1.31463	1.25349	0.651362	0.00968919	0.0658776	down	GO:0009698 phenylpropanoid metabolic process	--	GO:0016207 4-coumarate-CoA ligase activity;GO:0106290 trans-cinnamate-CoA ligase activity	I: Lipid transport and metabolism	K01904	ko00130: Ubiquinone and other terpenoid-quinone biosynthesis;ko00940: Phenylpropanoid biosynthesis;ko01100: Metabolic pathways;ko01110: Biosynthesis of secondary metabolites	IPR025110: AMP-binding enzyme, C-terminal domain;IPR020845: AMP-binding, conserved site;IPR045851: AMP-binding enzyme, C-terminal domain superfamily;IPR042099: ANL, N-terminal domain;IPR000873: AMP-dependent synthetase/ligase	chloroplast	--
Isoform0014121	pos:37-1617	--	0.754332	1.04289	1.00684	0.479644	0.522836	0.41139	0.504222	0.0077424	0.057967	down	--	--	--	--	--	--	IPR036389: Ribonuclease III, endonuclease domain superfamily;IPR011907: Ribonuclease III;IPR000999: Ribonuclease III domain	Cytoplasm	--
Isoform0014143	pos:62-1699	--	1.95618	1.50934	1.74589	2.71136	2.75191	2.79484	1.58462	0.0237116	0.109029	up	--	--	--	--	--	--	--	chloroplast	CS pos: 27-28. AAS-RV. Pr: 0.1641
Isoform0014144	pos:9-1913	--	0.206536	0.211928	0.301166	0.391063	0.447522	0.448622	1.78871	0.0276534	0.118899	up	GO:0005987 sucrose catabolic process	--	GO:0004575 sucrose alpha-glucosidase activity;GO:0033926 glycopeptide alpha-N-acetylgalactosaminidase activity	--	--	--	IPR024746: Glycosyl hydrolase family 100;IPR008928: Six-hairpin glycosidase superfamily;IPR012341: Six-hairpin glycosidase-like superfamily	chloroplast	--
Isoform0014175	pos:335-1834	--	0	0.159359	0	0	0	0	0	0	0	down	--	--	--	A: RNA processing and modification	K13179	--	IPR044773: DDX18/Has1, DEAD-box helicase domain;IPR014001: Helicase superfamily 1/2, ATP-binding domain;IPR011545: DEAD/DEAH box helicase domain;IPR001650: Helicase, C-terminal;IPR014014: RNA helicase, DEAD-box type, Q motif;IPR027417: P-loop containing nucleoside triphosphate hydrolase;IPR025313: Domain of unknown function DUF4217;IPR000629: ATP-dependent RNA helicase DEAD-box, conserved site	Cytoplasm	--
Isoform0014223	pos:145-1809	--	0.689457	0.544447	0.551908	0.860764	0.919666	0.941975	1.52446	0.0210535	0.101057	up	GO:0006874 cellular calcium ion homeostasis;GO:0070588 calcium ion transmembrane transport	GO:0005774 vacuolar membrane;GO:0016021 integral component of membrane	GO:0005509 calcium ion binding;GO:0015369 calcium:proton antiporter activity	--	--	--	IPR011992: EF-hand domain pair;IPR002048: EF-hand domain;IPR018247: EF-Hand 1, calcium-binding site;IPR004837: Sodium/calcium exchanger membrane region;IPR004713: Calcium/proton exchanger;IPR044880: NCX, central ion-binding domain superfamily	chloroplast	--
Isoform0014226	pos:177-1787	--	0.922379	0.644815	0.653211	0.552438	0.461314	0.435942	0.652896	0.0492742	0.164678	down	--	--	--	L: Replication, recombination and repair	--	--	IPR036063: Smr domain superfamily;IPR009818: Ataxin-2, C-terminal;IPR002625: Smr domain	Nucleus	--
Isoform0014245	pos:258-1628	--	4.0252	4.12867	3.81779	1.6524	1.61366	1.69022	0.414	3.54472e-05	0.00469539	down	GO:0010215 cellulose microfibril organization	GO:0031225 anchored component of membrane	--	--	--	--	IPR006918: COBRA, plant	Golgi apparatus_Plasma membrane	CS pos: 35-36. TEA-YD. Pr: 0.8168
Isoform0014254	pos:194-1807	--	0	0	0	0.555938	0	0.489347	inf	0	0	up	--	--	--	--	K01177	ko00500: Starch and sucrose metabolism;ko01100: Metabolic pathways;ko01110: Biosynthesis of secondary metabolites	IPR001554: Glycoside hydrolase, family 14;IPR017853: Glycoside hydrolase superfamily;IPR001371: Glycoside hydrolase, family 14B, plant;IPR018238: Glycoside hydrolase, family 14, conserved site	chloroplast	--
Isoform0014294	pos:248-1723	--	0.0937823	0	0	0	0	0	0	0	0	down	GO:0006338 chromatin remodeling	GO:0031011 Ino80 complex	--	--	--	--	IPR006880: INO80 complex subunit B-like conserved region;IPR007529: Zinc finger, HIT-type;IPR029523: INO80 complex, subunit Ies2	Nucleus	--
Isoform0014304	pos:151-1878	--	0.0848399	0.0942465	0.106607	0.129311	0.162256	0.156868	1.56964	0.00972657	0.0658776	up	--	GO:0005783 endoplasmic reticulum	--	O: Posttranslational modification, protein turnover, chaperones	K03686	--	IPR036249: Thioredoxin-like superfamily;IPR036869: Chaperone J-domain superfamily;IPR001623: DnaJ domain;IPR018253: DnaJ domain, conserved site	chloroplast	CS pos: 24-25. VAA-KT. Pr: 0.8507
Isoform0014307	pos:881-1699	--	0.0960167	0.118375	0.139276	0.070265	0	0.0819683	0.645662	0.0478342	0.16159	down	GO:0006468 protein phosphorylation	--	GO:0004674 protein serine/threonine kinase activity;GO:0005524 ATP binding	T: Signal transduction mechanisms	K13430	ko04626: Plant-pathogen interaction	IPR008271: Serine/threonine-protein kinase, active site;IPR011009: Protein kinase-like domain superfamily;IPR000719: Protein kinase domain	Cytoplasm	--
Isoform0014343	pos:208-1626	--	1.40942	1.23415	1.28882	0.65274	0.664682	0.668688	0.505065	0.00251159	0.0318117	down	--	--	GO:0003924 GTPase activity;GO:0005525 GTP binding	--	K03531	--	IPR024757: Cell division protein FtsZ, C-terminal;IPR036525: Tubulin/FtsZ, GTPase domain superfamily;IPR003008: Tubulin/FtsZ, GTPase domain;IPR020805: Cell division protein FtsZ, conserved site;IPR000158: Cell division protein FtsZ;IPR008280: Tubulin/FtsZ, C-terminal;IPR045061: Tubulin-like protein FtsZ/CetZ;IPR018316: Tubulin/FtsZ, 2-layer sandwich domain;IPR037103: Tubulin/FtsZ-like, C-terminal…	chloroplast	--
Isoform0014389	pos:103-1713	--	4.21809	4.34015	4.28316	9.96358	10.0266	10.1318	2.34569	1.28996e-06	0.00101507	up	--	GO:0009507 chloroplast;GO:0016021 integral component of membrane	GO:0010277 chlorophyllide a oxygenase [overall] activity;GO:0046872 metal ion binding;GO:0051537 2 iron, 2 sulfur cluster binding	--	K13071	ko00860: Porphyrin metabolism;ko01110: Biosynthesis of secondary metabolites	IPR017941: Rieske [2Fe-2S] iron-sulphur domain;IPR036922: Rieske [2Fe-2S] iron-sulphur domain superfamily;IPR013626: Pheophorbide a oxygenase	chloroplast	--
Isoform0014440	pos:2-1819	--	0.0807449	0.0785165	0	0.291746	0.489907	0.411579	4.99486	0.00866092	0.0610896	up	--	--	GO:0005524 ATP binding;GO:0140662 ATP-dependent protein folding chaperone	O: Posttranslational modification, protein turnover, chaperones	K03283	ko03040: Spliceosome;ko04141: Protein processing in endoplasmic reticulum;ko04144: Endocytosis	IPR029048: Heat shock protein 70kD, C-terminal domain superfamily;IPR018181: Heat shock protein 70, conserved site;IPR013126: Heat shock protein 70 family;IPR043129: ATPase, nucleotide binding domain;IPR029047: Heat shock protein 70kD, peptide-binding domain superfamily	Cytoplasm	--
Isoform0014501	pos:2-1843	--	0	0	0.0431343	0	0	0	0	0	0	down	GO:0006559 L-phenylalanine catabolic process;GO:0009800 cinnamic acid biosynthetic process	GO:0005737 cytoplasm	GO:0045548 phenylalanine ammonia-lyase activity	Q: Secondary metabolites biosynthesis, transport and catabolism	K10775	ko00360: Phenylalanine metabolism;ko00940: Phenylpropanoid biosynthesis;ko01100: Metabolic pathways;ko01110: Biosynthesis of secondary metabolites	IPR001106: Aromatic amino acid lyase;IPR022313: Phenylalanine/histidine ammonia-lyases, active site;IPR008948: L-Aspartase-like;IPR024083: Fumarase/histidase, N-terminal;IPR023144: Phenylalanine ammonia-lyase, shielding domain superfamily;IPR005922: Phenylalanine ammonia-lyase	chloroplast	--
Isoform0014528	pos:75-1907	--	0	0	0	0.0442883	0	0.291138	inf	0	0	up	GO:0005975 carbohydrate metabolic process	--	GO:0004553 hydrolase activity, hydrolyzing O-glycosyl compounds	G: Carbohydrate transport and metabolism	K01193	ko00052: Galactose metabolism;ko00500: Starch and sucrose metabolism;ko01100: Metabolic pathways;ko01110: Biosynthesis of secondary metabolites	IPR001362: Glycoside hydrolase, family 32;IPR013320: Concanavalin A-like lectin/glucanase domain superfamily;IPR023296: Glycosyl hydrolase, five-bladed beta-propellor domain superfamily;IPR018053: Glycoside hydrolase, family 32, active site;IPR013148: Glycosyl hydrolase family 32, N-terminal;IPR013189: Glycosyl hydrolase family 32, C-terminal	Mitochondrion	--
Isoform0014742	pos:212-982	--	0.176961	0.194353	0.212297	0.0825645	0.127138	0.117003	0.5598	0.0325364	0.128953	down	--	GO:0005737 cytoplasm	GO:0003723 RNA binding;GO:0003729 mRNA binding;GO:0046872 metal ion binding	R: General function prediction only	--	--	--	chloroplast	--
Isoform0014751	pos:82-1743	--	0.667556	0.62223	0.635827	0.301623	0.308356	0.360831	0.504157	0.00302252	0.035683	down	GO:0017004 cytochrome complex assembly	GO:0016021 integral component of membrane	--	--	K07399	--	IPR023494: Cytochrome c biogenesis protein Ccs1/CcsB/ResB;IPR007816: ResB-like domain	chloroplast	--
Isoform0014763	pos:12-1460	--	0	0	0.0230784	0	0	0	0	0	0	down	--	--	GO:0046983 protein dimerization activity	--	--	--	IPR045239: Transcription factor bHLH95-like, basic helix-loop-helix domain;IPR011598: Myc-type, basic helix-loop-helix (bHLH) domain;IPR036638: Helix-loop-helix DNA-binding domain superfamily	Nucleus	--
Isoform0014779	pos:77-1831	--	3.89317	3.45454	3.41814	42.4213	38.973	37.1825	11.0142	2.00608e-06	0.00115149	up	GO:0006529 asparagine biosynthetic process;GO:0006541 glutamine metabolic process	--	GO:0004066 asparagine synthase (glutamine-hydrolyzing) activity;GO:0005524 ATP binding	E: Amino acid transport and metabolism	K01953	ko00250: Alanine, aspartate and glutamate metabolism;ko01100: Metabolic pathways;ko01110: Biosynthesis of secondary metabolites;ko01230: Biosynthesis of amino acids	IPR033738: Asparagine synthase, N-terminal domain;IPR001962: Asparagine synthase;IPR006426: Asparagine synthase, glutamine-hydrolyzing;IPR029055: Nucleophile aminohydrolases, N-terminal;IPR017932: Glutamine amidotransferase type 2 domain;IPR014729: Rossmann-like alpha/beta/alpha sandwich fold	Cytoplasm	--
Isoform0014804	pos:3-1604	--	0	0	0	0	0.0769906	0	inf	0	0	up	GO:0006611 protein export from nucleus	GO:0005634 nucleus	GO:0005049 nuclear export signal receptor activity	Y: Nuclear structure;U: Intracellular trafficking, secretion, and vesicular transport	K14290	ko03008: Ribosome biogenesis in eukaryotes;ko03013: Nucleocytoplasmic transport;ko03250: Viral life cycle - HIV-1	IPR011989: Armadillo-like helical;IPR016024: Armadillo-type fold;IPR014877: Exportin-1, C-terminal;IPR045065: Exportin-1/5	Cytoplasm	--
Isoform0014816	pos:121-1530	--	1.1002	0.98863	0.890683	0.541946	0.585651	0.512303	0.550391	0.00234945	0.0304192	down	GO:0009423 chorismate biosynthetic process;GO:0019632 shikimate metabolic process	--	GO:0004764 shikimate 3-dehydrogenase (NADP+) activity;GO:0005525 GTP binding	R: General function prediction only	K06943	ko03008: Ribosome biogenesis in eukaryotes	IPR006073: GTP binding domain;IPR027417: P-loop containing nucleoside triphosphate hydrolase;IPR041623: NOG1, N-terminal helical domain;IPR030389: FeoB-type guanine nucleotide-binding (G) domain;IPR010674: Nucleolar GTP-binding protein 1, Rossman-fold domain	chloroplast	--
Isoform0014820	pos:153-1613	--	1.29086	1.40551	1.2968	2.39983	2.55792	2.53386	1.87611	9.99488e-05	0.00721083	up	--	--	--	--	K19893	ko00500: Starch and sucrose metabolism;ko01100: Metabolic pathways	IPR012946: X8 domain;IPR017853: Glycoside hydrolase superfamily;IPR000490: Glycoside hydrolase family 17;IPR044965: Glycoside hydrolase family 17, plant	Plasma membrane	CS pos: 24-25. AMG-LG. Pr: 0.6882
Isoform0014838	pos:45-1673	--	1.49856	1.44839	1.61081	0.918426	0.960434	0.909796	0.611849	0.000750612	0.0181065	down	--	GO:0016021 integral component of membrane	GO:0004497 monooxygenase activity;GO:0005506 iron ion binding;GO:0016705 oxidoreductase activity, acting on paired donors, with incorporation or reduction of molecular oxygen;GO:0020037 heme binding	Q: Secondary metabolites biosynthesis, transport and catabolism	K24188	--	IPR002401: Cytochrome P450, E-class, group I;IPR036396: Cytochrome P450 superfamily;IPR001128: Cytochrome P450;IPR017972: Cytochrome P450, conserved site	chloroplast	--
Isoform0014862	pos:1-1863	--	0.533762	0.464936	0.479115	1.91329	1.91861	1.85777	3.85006	0.000525689	0.015613	up	GO:0005975 carbohydrate metabolic process	--	--	--	K06617	ko00052: Galactose metabolism;ko01100: Metabolic pathways	IPR017853: Glycoside hydrolase superfamily;IPR008811: Glycosyl hydrolases 36;IPR013785: Aldolase-type TIM barrel	Cytoplasm	--
Isoform0014896	pos:190-1749	--	2.00224	2.15654	2.29943	1.26956	1.25422	1.1123	0.563016	0.000596555	0.0158651	down	GO:0051301 cell division	--	GO:0003924 GTPase activity;GO:0005525 GTP binding	--	K03531	--	IPR045061: Tubulin-like protein FtsZ/CetZ;IPR000158: Cell division protein FtsZ;IPR018316: Tubulin/FtsZ, 2-layer sandwich domain;IPR024757: Cell division protein FtsZ, C-terminal;IPR036525: Tubulin/FtsZ, GTPase domain superfamily;IPR003008: Tubulin/FtsZ, GTPase domain;IPR020805: Cell division protein FtsZ, conserved site;IPR008280: Tubulin/FtsZ, C-terminal;IPR037103: Tubulin/FtsZ-like, C-terminal…	chloroplast	--
Isoform0014900	pos:209-1648	--	1.61761	1.36298	1.28878	0.76549	0.956374	0.714259	0.570605	0.00839228	0.0600894	down	GO:0006065 UDP-glucuronate biosynthetic process	--	GO:0003979 UDP-glucose 6-dehydrogenase activity;GO:0051287 NAD binding	G: Carbohydrate transport and metabolism;T: Signal transduction mechanisms	K00012	ko00040: Pentose and glucuronate interconversions;ko00053: Ascorbate and aldarate metabolism;ko00520: Amino sugar and nucleotide sugar metabolism;ko01100: Metabolic pathways;ko01240: Biosynthesis of cofactors;ko01250: Biosynthesis of nucleotide sugars	IPR014027: UDP-glucose/GDP-mannose dehydrogenase, C-terminal;IPR001732: UDP-glucose/GDP-mannose dehydrogenase, N-terminal;IPR017476: UDP-glucose/GDP-mannose dehydrogenase;IPR008927: 6-phosphogluconate dehydrogenase-like, C-terminal domain superfamily;IPR028356: UDP-glucose 6-dehydrogenase, eukaryotic type;IPR036220: UDP-glucose/GDP-mannose dehydrogenase, C-terminal domain superfamily;IPR014026: U…	Extracell	--
Isoform0014902	pos:20-1906	--	0.024064	0.0297151	0.0337606	0	0	0	0	0	0	down	GO:0006857 oligopeptide transport	GO:0016021 integral component of membrane	GO:0022857 transmembrane transporter activity	E: Amino acid transport and metabolism	K26549	--	IPR000109: Proton-dependent oligopeptide transporter family;IPR036259: MFS transporter superfamily;IPR018456: PTR2 family proton/oligopeptide symporter, conserved site	Plasma membrane	--
Isoform0014958	pos:67-1452	--	0.197684	0.154462	0.169758	0.0513477	0.0694548	0.106043	0.434649	0.0418009	0.148824	down	GO:0016310 phosphorylation;GO:0019252 starch biosynthetic process	--	GO:0016301 kinase activity;GO:0016773 phosphotransferase activity, alcohol group as acceptor	G: Carbohydrate transport and metabolism	K00856	ko00230: Purine metabolism;ko01100: Metabolic pathways;ko01232: Nucleotide metabolism	IPR011611: Carbohydrate kinase PfkB;IPR002173: Carbohydrate/purine kinase, PfkB, conserved site;IPR002139: Ribokinase/fructokinase;IPR029056: Ribokinase-like	chloroplast	--
Isoform0014979	pos:163-1842	--	0.602117	0.556755	0.58089	0.372442	0.383549	0.357556	0.640057	0.000135565	0.00787261	down	GO:0000272 polysaccharide catabolic process	--	GO:0031176 endo-1,4-beta-xylanase activity	--	--	--	IPR044846: Glycoside hydrolase family 10;IPR001000: Glycoside hydrolase family 10 domain;IPR017853: Glycoside hydrolase superfamily	chloroplast	CS pos: 29-30. VAA-VP. Pr: 0.3677
Isoform0015061	pos:464-1597	--	0	0	0	0.333555	0	0	inf	0	0	up	GO:0006468 protein phosphorylation	--	GO:0004672 protein kinase activity;GO:0005524 ATP binding	T: Signal transduction mechanisms	K13430	ko04626: Plant-pathogen interaction	IPR011009: Protein kinase-like domain superfamily;IPR000719: Protein kinase domain;IPR001245: Serine-threonine/tyrosine-protein kinase, catalytic domain	Cytoplasm	--
Isoform0015104	pos:10-1875	--	1.1593	1.09328	1.24272	2.0561	1.98777	1.99686	1.72825	0.00258899	0.0323061	up	GO:0044275 cellular carbohydrate catabolic process	--	GO:0052692 raffinose alpha-galactosidase activity	G: Carbohydrate transport and metabolism	K07407	ko00052: Galactose metabolism;ko00561: Glycerolipid metabolism;ko00600: Sphingolipid metabolism;ko00603: Glycosphingolipid biosynthesis - globo and isoglobo series;ko01100: Metabolic pathways	IPR000772: Ricin B, lectin domain;IPR002241: Glycoside hydrolase, family 27;IPR013785: Aldolase-type TIM barrel;IPR035992: Ricin B-like lectins;IPR013780: Glycosyl hydrolase, all-beta;IPR041233: Alpha galactosidase, C-terminal beta sandwich domain;IPR017853: Glycoside hydrolase superfamily	Nucleus	CS pos: 24-25. CEA-EA. Pr: 0.5281
Isoform0015141	pos:49-1743	--	0.10985	0.175082	0.156499	2.31608	2.01782	1.92383	14.176	0.000863825	0.0189491	up	GO:0009072 aromatic amino acid family metabolic process	--	GO:0003868 4-hydroxyphenylpyruvate dioxygenase activity;GO:0046872 metal ion binding	E: Amino acid transport and metabolism	K00457	ko00130: Ubiquinone and other terpenoid-quinone biosynthesis;ko00350: Tyrosine metabolism;ko00360: Phenylalanine metabolism;ko01100: Metabolic pathways;ko01240: Biosynthesis of cofactors	IPR037523: Vicinal oxygen chelate (VOC) domain;IPR029068: Glyoxalase/Bleomycin resistance protein/Dihydroxybiphenyl dioxygenase;IPR041736: 4-hydroxyphenylpyruvate dioxygenase, N-terminal;IPR004360: Glyoxalase/fosfomycin resistance/dioxygenase domain;IPR005956: 4-hydroxyphenylpyruvate dioxygenase;IPR041735: 4-hydroxyphenylpyruvate dioxygenase, C-terminal	chloroplast	--
Isoform0015146	pos:300-1616	--	0	0	0	0	0	0.113268	inf	0	0	up	GO:0006536 glutamate metabolic process	--	GO:0004351 glutamate decarboxylase activity;GO:0030170 pyridoxal phosphate binding	E: Amino acid transport and metabolism	K01580	ko00250: Alanine, aspartate and glutamate metabolism;ko00410: beta-Alanine metabolism;ko00430: Taurine and hypotaurine metabolism;ko00650: Butanoate metabolism;ko01100: Metabolic pathways;ko01110: Biosynthesis of secondary metabolites	IPR002129: Pyridoxal phosphate-dependent decarboxylase;IPR010107: Glutamate decarboxylase;IPR015424: Pyridoxal phosphate-dependent transferase;IPR015421: Pyridoxal phosphate-dependent transferase, major domain	Cytoplasm	--
Isoform0015163	pos:14-1747	--	3.04993	2.99634	3.04943	1.22585	1.26089	1.23011	0.408638	7.15149e-07	0.00101507	down	--	--	--	C: Energy production and conversion	K00029	ko00620: Pyruvate metabolism;ko00710: Carbon fixation in photosynthetic organisms;ko01100: Metabolic pathways;ko01200: Carbon metabolism	IPR046346: Aminoacid dehydrogenase-like, N-terminal domain superfamily;IPR036291: NAD(P)-binding domain superfamily;IPR012301: Malic enzyme, N-terminal domain;IPR001891: Malic oxidoreductase;IPR012302: Malic enzyme, NAD-binding;IPR015884: Malic enzyme, conserved site;IPR037062: Malic enzyme, N-terminal domain superfamily	Cytoplasm	--
Isoform0015213	pos:94-1650	--	1.92323	1.80298	1.95808	1.17888	1.05726	1.14636	0.59506	0.000329522	0.0126801	down	--	GO:0016021 integral component of membrane	GO:0015144 carbohydrate transmembrane transporter activity;GO:0015293 symporter activity	R: General function prediction only	K08150	--	IPR036259: MFS transporter superfamily;IPR005828: Major facilitator, sugar transporter-like;IPR003663: Sugar/inositol transporter;IPR020846: Major facilitator superfamily domain;IPR005829: Sugar transporter, conserved site;IPR045262: Sugar transport protein STP/Polyol transporter PLT, plant	vacuolar membrane	--
Isoform0015218	pos:43-1524	--	3.23783	3.44374	3.57559	8.2861	8.38006	8.50174	2.45369	0.000540441	0.0156691	up	GO:0009450 gamma-aminobutyric acid catabolic process	GO:0005739 mitochondrion	GO:0004777 succinate-semialdehyde dehydrogenase (NAD+) activity	C: Energy production and conversion	K17761	ko00250: Alanine, aspartate and glutamate metabolism;ko00650: Butanoate metabolism;ko01100: Metabolic pathways	IPR029510: Aldehyde dehydrogenase, glutamic acid active site;IPR016163: Aldehyde dehydrogenase, C-terminal;IPR016162: Aldehyde dehydrogenase, N-terminal;IPR010102: Succinate semialdehyde dehydrogenase;IPR015590: Aldehyde dehydrogenase domain;IPR016160: Aldehyde dehydrogenase, cysteine active site;IPR016161: Aldehyde/histidinol dehydrogenase	Cytoplasm	--
Isoform0015256	pos:83-1594	--	2.37214	2.10824	2.22865	4.27138	4.27136	4.01364	1.87156	0.000320146	0.0125294	up	--	--	--	--	--	--	IPR004873: BURP domain;IPR044816: BURP domain-containing protein	Extracell	CS pos: 24-25. AHA-AR. Pr: 0.5395
Isoform0015265	pos:297-1733	--	0.956767	0.985444	0.840898	1.70127	1.81416	1.87339	1.93626	0.000948562	0.0198074	up	--	--	--	E: Amino acid transport and metabolism	K15015	--	IPR013057: Amino acid transporter, transmembrane domain	vacuolar membrane	--
Isoform0015281	pos:276-1913	--	0	0	0	0.0353274	0	0	inf	0	0	up	--	GO:0000139 Golgi membrane;GO:0016021 integral component of membrane	GO:0016763 pentosyltransferase activity	S: Function unknown	--	--	IPR007657: Glycosyltransferase 61	chloroplast	--
Isoform0015307	pos:285-1826	--	0.31031	0.275496	0.289827	0.171721	0.19232	0.216128	0.66257	0.0115098	0.0727771	down	--	--	--	--	--	--	IPR000048: IQ motif, EF-hand binding site	Nucleus	--
Isoform0015338	pos:75-1634	--	3.51837	4.52285	3.55026	13.2335	12.9474	13.3683	3.41192	0.00401339	0.0415079	up	--	GO:0005737 cytoplasm;GO:0009507 chloroplast;GO:0016021 integral component of membrane	GO:0010277 chlorophyllide a oxygenase [overall] activity;GO:0016491 oxidoreductase activity;GO:0046872 metal ion binding;GO:0051537 2 iron, 2 sulfur cluster binding	--	K13071	ko00860: Porphyrin metabolism;ko01110: Biosynthesis of secondary metabolites	IPR036922: Rieske [2Fe-2S] iron-sulphur domain superfamily;IPR017941: Rieske [2Fe-2S] iron-sulphur domain;IPR013626: Pheophorbide a oxygenase	chloroplast	--
Isoform0015348	pos:38-1615	--	5.33836	5.29119	5.19799	8.61087	8.65578	8.91393	1.65412	7.14994e-06	0.00205203	up	GO:0009450 gamma-aminobutyric acid catabolic process	GO:0005739 mitochondrion	GO:0004777 succinate-semialdehyde dehydrogenase (NAD+) activity	C: Energy production and conversion	K17761	ko00250: Alanine, aspartate and glutamate metabolism;ko00650: Butanoate metabolism;ko01100: Metabolic pathways	IPR016163: Aldehyde dehydrogenase, C-terminal;IPR015590: Aldehyde dehydrogenase domain;IPR016160: Aldehyde dehydrogenase, cysteine active site;IPR029510: Aldehyde dehydrogenase, glutamic acid active site;IPR010102: Succinate semialdehyde dehydrogenase;IPR016161: Aldehyde/histidinol dehydrogenase;IPR016162: Aldehyde dehydrogenase, N-terminal	chloroplast	--
Isoform0015370	pos:3-1517	--	1.50409	1.28953	1.14006	0.874451	0.792864	0.821173	0.632612	0.0202994	0.0991646	down	--	--	GO:0016747 acyltransferase activity, transferring groups other than amino-acyl groups	--	K19747	--	IPR023213: Chloramphenicol acetyltransferase-like domain superfamily	chloroplast	--
Isoform0015374	pos:378-1622	--	0.985275	1.01738	1.00829	0.479719	0.445299	0.486057	0.468649	0.000423136	0.0143574	down	GO:0006486 protein glycosylation	GO:0005794 Golgi apparatus;GO:0016020 membrane	GO:0016757 glycosyltransferase activity	G: Carbohydrate transport and metabolism;M: Cell wall/membrane/envelope biogenesis;W: Extracellular structures	K20870	--	IPR004263: Exostosin-like;IPR040911: Exostosin, GT47 domain	Plasma membrane	CS pos: 27-28. VRG-QD. Pr: 0.7054
Isoform0015385	pos:49-1761	--	0.863613	0.997814	1.05657	1.58697	1.44121	1.42688	1.52676	0.00734067	0.0563232	up	--	--	--	F: Nucleotide transport and metabolism;H: Coenzyme transport and metabolism	K03457	--	IPR001248: Purine-cytosine permease;IPR045225: Uracil/uridine/allantoin permease	Plasma membrane	--
Isoform0015400	pos:367-1746	--	0.28554	0.241933	0.252395	0.450999	0.409374	0.424768	1.6479	0.00252182	0.0318117	up	--	GO:0005634 nucleus	GO:0004518 nuclease activity;GO:0046872 metal ion binding	L: Replication, recombination and repair	--	--	IPR027806: Harbinger transposase-derived nuclease domain	chloroplast	CS pos: 19-20. AEG-HA. Pr: 0.2978
Isoform0015427	pos:96-1829	--	0	0	0	0.122603	0.163677	0.155316	inf	0	0	up	GO:0046274 lignin catabolic process	GO:0048046 apoplast	GO:0005507 copper ion binding;GO:0016491 oxidoreductase activity;GO:0052716 hydroquinone:oxygen oxidoreductase activity	Q: Secondary metabolites biosynthesis, transport and catabolism	K05909	--	IPR008972: Cupredoxin;IPR011706: Multicopper oxidase, C-terminal;IPR002355: Multicopper oxidase, copper-binding site;IPR034285: Laccase, second cupredoxin domain;IPR034289: Laccase, third cupredoxin domain;IPR001117: Multicopper oxidase, second cupredoxin domain;IPR045087: Multicopper oxidase;IPR011707: Multicopper oxidase, N-terminal;IPR033138: Multicopper oxidases, conserved site;IPR034288: Lac…	chloroplast	CS pos: 22-23. AAA-TP. Pr: 0.5338
Isoform0015439	pos:325-1611	--	0.622293	0.501963	0.583176	0.150389	0.22496	0.196244	0.334768	0.00346084	0.0386985	down	GO:0071555 cell wall organization	GO:0000139 Golgi membrane	GO:0015018 galactosylgalactosylxylosylprotein 3-beta-glucuronosyltransferase activity	O: Posttranslational modification, protein turnover, chaperones	K20871	--	IPR029044: Nucleotide-diphospho-sugar transferases;IPR005027: Glycosyl transferase, family 43	Cytoplasm	--
Isoform0015539	pos:192-1040	--	0.12497	0	0.127267	0.0903548	0.0765054	0.0677425	0.62006	0.027199	0.117828	down	GO:0006289 nucleotide-excision repair;GO:0006351 transcription, DNA-templated;GO:0006357 regulation of transcription by RNA polymerase II	GO:0000439 transcription factor TFIIH core complex;GO:0005675 transcription factor TFIIH holo complex	GO:0008270 zinc ion binding	K: Transcription;L: Replication, recombination and repair	K03142	ko03022: Basal transcription factors;ko03420: Nucleotide excision repair	IPR036465: von Willebrand factor A-like domain superfamily;IPR002035: von Willebrand factor, type A;IPR007198: Ssl1-like	Cytoskeleton	--
Isoform0015619	pos:73-1659	--	0.362243	0.429163	0.520413	0.724519	0.773274	0.764643	1.72466	0.0299526	0.123407	up	--	--	GO:0008194 UDP-glycosyltransferase activity	G: Carbohydrate transport and metabolism;C: Energy production and conversion	K13496	ko00908: Zeatin biosynthesis;ko01110: Biosynthesis of secondary metabolites	IPR035595: UDP-glycosyltransferase family, conserved site;IPR002213: UDP-glucuronosyl/UDP-glucosyltransferase	chloroplast	--
Isoform0015659	pos:209-1501	--	0.164724	0.222879	0.224506	0.29494	0.371499	0.351838	1.66356	0.0182258	0.0925991	up	GO:0016024 CDP-diacylglycerol biosynthetic process	GO:0016021 integral component of membrane	GO:0004605 phosphatidate cytidylyltransferase activity	I: Lipid transport and metabolism	K00981	ko00564: Glycerophospholipid metabolism;ko01100: Metabolic pathways;ko01110: Biosynthesis of secondary metabolites;ko04070: Phosphatidylinositol signaling system	IPR000374: Phosphatidate cytidylyltransferase;IPR016720: Phosphatidate cytidylyltransferase, eukaryota	Plasma membrane	--
Isoform0015763	pos:66-1634	--	0.335238	0.375141	0.301841	0.721197	0.668766	0.689004	2.05387	0.00372152	0.0399281	up	GO:0005975 carbohydrate metabolic process	GO:0009507 chloroplast	GO:0008422 beta-glucosidase activity;GO:0102726 DIMBOA glucoside beta-D-glucosidase activity	G: Carbohydrate transport and metabolism	K01188	ko00460: Cyanoamino acid metabolism;ko00500: Starch and sucrose metabolism;ko00999: Biosynthesis of various plant secondary metabolites;ko01100: Metabolic pathways;ko01110: Biosynthesis of secondary metabolites	IPR001360: Glycoside hydrolase family 1;IPR017853: Glycoside hydrolase superfamily;IPR033132: Glycosyl hydrolases family 1, N-terminal conserved site	Mitochondrion	CS pos: 29-30. ASA-AA. Pr: 0.4951
Isoform0015824	pos:98-1708	--	8.85274	7.57222	7.50093	4.017	3.98127	3.85795	0.49554	0.00417743	0.0423687	down	--	--	--	D: Cell cycle control, cell division, chromosome partitioning	K03593	--	IPR000808: Mrp, conserved site;IPR044304: Iron-sulfur protein NUBPL-like;IPR002744: MIP18 family-like;IPR034904: Fe-S cluster assembly domain superfamily;IPR027417: P-loop containing nucleoside triphosphate hydrolase;IPR038492: GBBH-like, N-terminal domain superfamily;IPR033756: Flagellum site-determining protein YlxH/ Fe-S cluster assembling factor NBP35;IPR010376: Gamma-butyrobetaine hydroxylas…	chloroplast	--
Isoform0015835	pos:244-1683	--	40.9168	41.2389	41.8475	27.3456	25.1558	24.7595	0.623056	0.00302539	0.035683	down	GO:0006024 glycosaminoglycan biosynthetic process;GO:0006065 UDP-glucuronate biosynthetic process	GO:0005634 nucleus;GO:0005829 cytosol	GO:0003979 UDP-glucose 6-dehydrogenase activity;GO:0051287 NAD binding	G: Carbohydrate transport and metabolism;T: Signal transduction mechanisms	K00012	ko00040: Pentose and glucuronate interconversions;ko00053: Ascorbate and aldarate metabolism;ko00520: Amino sugar and nucleotide sugar metabolism;ko01100: Metabolic pathways;ko01240: Biosynthesis of cofactors;ko01250: Biosynthesis of nucleotide sugars	IPR017476: UDP-glucose/GDP-mannose dehydrogenase;IPR036291: NAD(P)-binding domain superfamily;IPR001732: UDP-glucose/GDP-mannose dehydrogenase, N-terminal;IPR036220: UDP-glucose/GDP-mannose dehydrogenase, C-terminal domain superfamily;IPR028356: UDP-glucose 6-dehydrogenase, eukaryotic type;IPR008927: 6-phosphogluconate dehydrogenase-like, C-terminal domain superfamily;IPR014026: UDP-glucose/GDP-m…	Extracell	--
Isoform0015873	pos:2-1429	--	1.52805	1.58102	1.549	2.34265	2.76266	2.35881	1.60241	0.0109353	0.0706658	up	--	GO:0016021 integral component of membrane	GO:0004497 monooxygenase activity;GO:0005506 iron ion binding;GO:0016705 oxidoreductase activity, acting on paired donors, with incorporation or reduction of molecular oxygen;GO:0020037 heme binding	Q: Secondary metabolites biosynthesis, transport and catabolism	K24184	--	IPR017972: Cytochrome P450, conserved site;IPR036396: Cytochrome P450 superfamily;IPR001128: Cytochrome P450;IPR002401: Cytochrome P450, E-class, group I	Extracell	--
Isoform0015891	pos:182-1513	--	0.430749	0.307173	0.338341	0.857341	0.782024	0.932935	2.39003	0.0045826	0.0445833	up	GO:0005975 carbohydrate metabolic process	--	GO:0042973 glucan endo-1,3-beta-D-glucosidase activity	--	K19893	ko00500: Starch and sucrose metabolism;ko01100: Metabolic pathways	IPR012946: X8 domain;IPR017853: Glycoside hydrolase superfamily;IPR000490: Glycoside hydrolase family 17;IPR044965: Glycoside hydrolase family 17, plant	Nucleus	--
Isoform0015917	pos:27-1724	--	0.319487	0.316258	0.39444	0.207324	0.187162	0.189054	0.566442	0.0072075	0.0557812	down	--	--	GO:0003723 RNA binding;GO:0003724 RNA helicase activity;GO:0005524 ATP binding;GO:0016787 hydrolase activity	A: RNA processing and modification	K12858	ko03040: Spliceosome	IPR001650: Helicase, C-terminal;IPR014014: RNA helicase, DEAD-box type, Q motif;IPR014001: Helicase superfamily 1/2, ATP-binding domain;IPR011545: DEAD/DEAH box helicase domain;IPR027417: P-loop containing nucleoside triphosphate hydrolase	chloroplast	--
Isoform0015918	pos:935-1762	--	0.937414	0.925572	0.977559	0.567369	0.450479	0.509706	0.537768	0.00815542	0.0593811	down	--	--	GO:0003723 RNA binding	K: Transcription	K11294	--	IPR035979: RNA-binding domain superfamily;IPR034350: NUCL, RNA recognition motif 2;IPR012677: Nucleotide-binding alpha-beta plait domain superfamily;IPR000504: RNA recognition motif domain	Nucleus	--
Isoform0015920	pos:103-1599	--	1.0243	1.0667	1.00223	2.18768	1.934	2.06191	1.99908	0.000433644	0.0146419	up	GO:0006950 response to stress	--	GO:0005524 ATP binding;GO:0016887 ATP hydrolysis activity	O: Posttranslational modification, protein turnover, chaperones	K03064	ko03050: Proteasome	IPR003593: AAA+ ATPase domain;IPR003959: ATPase, AAA-type, core;IPR027417: P-loop containing nucleoside triphosphate hydrolase;IPR003960: ATPase, AAA-type, conserved site;IPR025753: AAA-type ATPase, N-terminal domain	chloroplast	--
Isoform0015924	pos:289-1659	--	0.364707	0.370479	0.271367	0.149122	0.175893	0.184203	0.505903	0.00794282	0.0590185	down	GO:0006486 protein glycosylation	GO:0005794 Golgi apparatus;GO:0016021 integral component of membrane	GO:0016757 glycosyltransferase activity	G: Carbohydrate transport and metabolism;M: Cell wall/membrane/envelope biogenesis;W: Extracellular structures	K20870	--	IPR040911: Exostosin, GT47 domain;IPR004263: Exostosin-like	Plasma membrane	--
Isoform0016039	pos:15-1736	--	0.342551	0.418729	0.37578	1.07704	1.18288	1.15931	3.00708	0.00052028	0.015613	up	GO:0046148 pigment biosynthetic process	--	GO:0004097 catechol oxidase activity;GO:0046872 metal ion binding	--	--	--	IPR002227: Tyrosinase copper-binding domain;IPR022739: Polyphenol oxidase, central domain;IPR016213: Polyphenol oxidase;IPR008922: Di-copper centre-containing domain superfamily;IPR022740: Polyphenol oxidase, C-terminal	Nucleus	--
Isoform0016141	pos:201-1640	--	0.452579	0.572611	0.482425	0.880381	0.771337	0.987099	1.75033	0.00501334	0.0464965	up	GO:0006508 proteolysis	--	GO:0004190 aspartic-type endopeptidase activity	O: Posttranslational modification, protein turnover, chaperones	K22683	--	IPR021109: Aspartic peptidase domain superfamily;IPR001969: Aspartic peptidase, active site;IPR032799: Xylanase inhibitor, C-terminal;IPR032861: Xylanase inhibitor, N-terminal;IPR001461: Aspartic peptidase A1 family;IPR033121: Peptidase family A1 domain;IPR034161: Pepsin-like domain, plant	chloroplast	CS pos: 23-24. ASG-RR. Pr: 0.4924
Isoform0016143	pos:42-1619	--	22.6865	19.5141	20.0596	12.2162	12.0149	13.0572	0.59891	0.00202835	0.0278868	down	GO:0006457 protein folding;GO:0015031 protein transport	--	GO:0003755 peptidyl-prolyl cis-trans isomerase activity	--	K03545	--	IPR036611: Trigger factor ribosome-binding domain superfamily;IPR005215: Trigger factor;IPR046357: Peptidyl-prolyl cis-trans isomerase domain superfamily;IPR037041: Trigger factor, C-terminal domain superfamily;IPR008880: Trigger factor, C-terminal;IPR027304: Trigger factor/SurA domain superfamily;IPR008881: Trigger factor, ribosome-binding, bacterial	chloroplast	--
Isoform0016158	pos:116-1657	--	0.123237	0.127737	0.153846	0.24068	0.36992	0.273473	2.18387	0.0122437	0.0751595	up	--	--	GO:0016788 hydrolase activity, acting on ester bonds	--	K01114	ko00562: Inositol phosphate metabolism;ko00564: Glycerophospholipid metabolism;ko00565: Ether lipid metabolism;ko01100: Metabolic pathways;ko01110: Biosynthesis of secondary metabolites	IPR007312: Phosphoesterase;IPR017850: Alkaline-phosphatase-like, core domain superfamily	Cytoplasm	--
Isoform0016202	pos:132-1682	--	0.179376	0.11858	0.102258	0.0418295	0.0621433	0.0439343	0.36957	0.0113728	0.0727567	down	--	--	GO:0003676 nucleic acid binding;GO:0005524 ATP binding	A: RNA processing and modification	K12823	ko03040: Spliceosome	IPR027417: P-loop containing nucleoside triphosphate hydrolase;IPR011545: DEAD/DEAH box helicase domain	Cytoplasm	--
Isoform0016238	pos:71-1702	--	0	0	0	0	0	0.0238691	inf	0	0	up	GO:0006633 fatty acid biosynthetic process	GO:0016021 integral component of membrane	GO:0102756 very-long-chain 3-ketoacyl-CoA synthase activity	--	K15397	ko00062: Fatty acid elongation;ko01100: Metabolic pathways;ko01110: Biosynthesis of secondary metabolites;ko04626: Plant-pathogen interaction	IPR012392: Very-long-chain 3-ketoacyl-CoA synthase;IPR013601: FAE1/Type III polyketide synthase-like protein;IPR016039: Thiolase-like;IPR013747: Beta-ketoacyl-[acyl-carrier-protein] synthase III, C-terminal	chloroplast	--
Isoform0016272	pos:91-1644	--	0.124558	0.0926581	0.0645234	0.221229	0.233218	0.220915	2.39711	0.040015	0.144989	up	--	GO:0016021 integral component of membrane	GO:0004497 monooxygenase activity;GO:0005506 iron ion binding;GO:0016705 oxidoreductase activity, acting on paired donors, with incorporation or reduction of molecular oxygen;GO:0020037 heme binding	Q: Secondary metabolites biosynthesis, transport and catabolism	K24542	--	IPR017972: Cytochrome P450, conserved site;IPR001128: Cytochrome P450;IPR002401: Cytochrome P450, E-class, group I;IPR036396: Cytochrome P450 superfamily	chloroplast	--
Isoform0016276	pos:621-1730	--	0.278082	0.303478	0.360352	1.72855	1.61567	1.67751	5.33142	0.00117219	0.0218218	up	--	--	--	--	--	--	IPR008479: Protein of unknown function DUF760;IPR038925: UV-B-induced protein At3g17800-like	Mitochondrion	--
Isoform0016286	pos:170-1558	--	1.31246	1.49486	1.30687	2.71284	2.62657	2.61156	1.93258	0.00268558	0.0330879	up	GO:0006559 L-phenylalanine catabolic process;GO:0006570 tyrosine metabolic process	--	GO:0004411 homogentisate 1,2-dioxygenase activity;GO:0046872 metal ion binding	E: Amino acid transport and metabolism	K00451	ko00350: Tyrosine metabolism;ko01100: Metabolic pathways	IPR046452: Homogentisate 1,2-dioxygenase, N-terminal domain;IPR005708: Homogentisate 1,2-dioxygenase;IPR046451: Homogentisate 1,2-dioxygenase, C-terminal domain;IPR011051: RmlC-like cupin domain superfamily;IPR014710: RmlC-like jelly roll fold	chloroplast	--
Isoform0016294	pos:88-1425	--	1.14613	1.10769	1.12187	2.38011	2.56448	2.18853	2.11308	0.00264284	0.0327997	up	GO:0040008 regulation of growth	GO:0005737 cytoplasm	GO:0003747 translation release factor activity;GO:0016747 acyltransferase activity, transferring groups other than amino-acyl groups	J: Translation, ribosomal structure and biogenesis	K03265	ko03015: mRNA surveillance pathway	IPR029064: 50S ribosomal protein L30e-like;IPR005140: eRF1 domain 1/Pelota-like;IPR042226: eRF1, domain 2 superfamily;IPR024049: eRF1, domain 1;IPR005142: eRF1 domain 3;IPR004403: Peptide chain release factor eRF1/aRF1;IPR005141: eRF1 domain 2	Cytoplasm	--
Isoform0016297	pos:101-1633	--	0	0	0	0	0.0932343	0	inf	0	0	up	GO:0016125 sterol metabolic process	--	GO:0004497 monooxygenase activity;GO:0005506 iron ion binding;GO:0016491 oxidoreductase activity;GO:0016705 oxidoreductase activity, acting on paired donors, with incorporation or reduction of molecular oxygen;GO:0020037 heme binding	Q: Secondary metabolites biosynthesis, transport and catabolism;I: Lipid transport and metabolism	K09832	ko00100: Steroid biosynthesis;ko01100: Metabolic pathways;ko01110: Biosynthesis of secondary metabolites	IPR001128: Cytochrome P450;IPR002403: Cytochrome P450, E-class, group IV;IPR017972: Cytochrome P450, conserved site;IPR036396: Cytochrome P450 superfamily	Cytoplasm	--
Isoform0016334	pos:360-1691	--	0	0	0	0.0261627	0.0331061	0.0329329	inf	0	0	up	--	--	--	--	--	--	--	Nucleus	--
Isoform0016341	pos:30-1559	--	0.835	0.958661	0.918919	0.364105	0.289346	0.423532	0.397033	0.00752107	0.0568995	down	GO:0000373 Group II intron splicing	--	GO:0003723 RNA binding	--	--	--	IPR021099: Plant organelle RNA recognition domain;IPR045040: PORR family	chloroplast	--
Isoform0016357	pos:226-1539	--	0.632311	1.00998	0.946272	1.93561	1.59767	1.59982	1.98299	0.0265592	0.11584	up	GO:0005975 carbohydrate metabolic process	GO:0046658 anchored component of plasma membrane	GO:0042973 glucan endo-1,3-beta-D-glucosidase activity	--	K19891	ko00500: Starch and sucrose metabolism;ko01100: Metabolic pathways	IPR000490: Glycoside hydrolase family 17;IPR044965: Glycoside hydrolase family 17, plant;IPR012946: X8 domain;IPR017853: Glycoside hydrolase superfamily	chloroplast	--
Isoform0016367	pos:135-1664	--	1.33902	1.43611	1.56782	2.75896	2.72711	2.71436	1.88822	0.00469991	0.0452377	up	--	--	GO:0016746 acyltransferase activity	C: Energy production and conversion	K09699	ko00280: Valine, leucine and isoleucine degradation;ko00640: Propanoate metabolism;ko00785: Lipoic acid metabolism;ko01100: Metabolic pathways;ko01110: Biosynthesis of secondary metabolites	IPR001078: 2-oxoacid dehydrogenase acyltransferase, catalytic domain;IPR000089: Biotin/lipoyl attachment;IPR003016: 2-oxo acid dehydrogenase, lipoyl-binding site;IPR004167: Peripheral subunit-binding domain;IPR036625: E3-binding domain superfamily;IPR023213: Chloramphenicol acetyltransferase-like domain superfamily;IPR011053: Single hybrid motif	Mitochondrion	--
Isoform0016437	pos:47-1585	--	1.02289	0.9878	0.973955	2.78118	3.49349	2.38944	2.90289	0.00982443	0.0664089	up	GO:0006508 proteolysis	--	GO:0008236 serine-type peptidase activity	--	K03797	--	IPR001478: PDZ domain;IPR004447: C-terminal-processing peptidase S41A;IPR005151: Tail specific protease;IPR029045: ClpP/crotonase-like domain superfamily;IPR036034: PDZ superfamily;IPR041489: PDZ domain 6	Cytoplasm	--
Isoform0016478	pos:3-1589	--	0.322873	0.402477	0.330746	0.0780301	0.076741	0.0572588	0.200768	0.000377421	0.0135707	down	--	GO:0016020 membrane;GO:0016021 integral component of membrane	GO:0005506 iron ion binding;GO:0016709 oxidoreductase activity, acting on paired donors, with incorporation or reduction of molecular oxygen, NAD(P)H as one donor, and incorporation of one atom of oxygen;GO:0020037 heme binding	Q: Secondary metabolites biosynthesis, transport and catabolism	K21995	ko00073: Cutin, suberine and wax biosynthesis	IPR001128: Cytochrome P450;IPR017972: Cytochrome P450, conserved site;IPR036396: Cytochrome P450 superfamily;IPR002401: Cytochrome P450, E-class, group I	chloroplast	--
Isoform0016483	pos:23-1615	--	2.62681	2.84397	2.62046	1.81064	1.67625	1.82348	0.656312	0.000380249	0.0135707	down	--	GO:0016021 integral component of membrane	GO:0004497 monooxygenase activity;GO:0005506 iron ion binding;GO:0016705 oxidoreductase activity, acting on paired donors, with incorporation or reduction of molecular oxygen;GO:0020037 heme binding	Q: Secondary metabolites biosynthesis, transport and catabolism	K05280	ko00941: Flavonoid biosynthesis;ko00944: Flavone and flavonol biosynthesis;ko01100: Metabolic pathways;ko01110: Biosynthesis of secondary metabolites	IPR001128: Cytochrome P450;IPR036396: Cytochrome P450 superfamily;IPR017972: Cytochrome P450, conserved site;IPR002401: Cytochrome P450, E-class, group I	chloroplast	--
Isoform0016526	pos:93-1517	--	4.73487	4.53492	4.17136	2.45782	2.46242	2.71533	0.568074	0.00036845	0.0133573	down	GO:0006629 lipid metabolic process	GO:0016021 integral component of membrane	--	--	K10255	--	IPR005804: Fatty acid desaturase domain	chloroplast	--
Isoform0016535	pos:100-1575	--	0.228227	0.239707	0.190723	0.36586	0.323996	0.412306	1.67335	0.00636354	0.0521811	up	--	--	GO:0016747 acyltransferase activity, transferring groups other than amino-acyl groups	--	K19747	--	IPR023213: Chloramphenicol acetyltransferase-like domain superfamily	chloroplast	--
Isoform0016574	pos:43-1620	--	25.7964	24.0081	24.6677	15.4513	15.3713	15.2291	0.618375	0.00132605	0.0233007	down	GO:0006457 protein folding;GO:0015031 protein transport	--	GO:0003755 peptidyl-prolyl cis-trans isomerase activity	--	K03545	--	IPR037041: Trigger factor, C-terminal domain superfamily;IPR036611: Trigger factor ribosome-binding domain superfamily;IPR027304: Trigger factor/SurA domain superfamily;IPR005215: Trigger factor;IPR008880: Trigger factor, C-terminal;IPR008881: Trigger factor, ribosome-binding, bacterial;IPR046357: Peptidyl-prolyl cis-trans isomerase domain superfamily	chloroplast	--
Isoform0016614	pos:74-1669	--	0.847985	0.804132	0.819949	1.36731	1.36523	1.40849	1.67513	3.5025e-05	0.00469539	up	GO:0006508 proteolysis	GO:0005737 cytoplasm	GO:0030145 manganese ion binding;GO:0070006 metalloaminopeptidase activity	R: General function prediction only	K01255	ko00480: Glutathione metabolism;ko01100: Metabolic pathways	IPR011356: Peptidase M17, leucine aminopeptidase/peptidase B;IPR000819: Peptidase M17, leucyl aminopeptidase, C-terminal;IPR043472: Macro domain-like;IPR023042: Peptidase M17, leucine aminopeptidase;IPR008283: Peptidase M17, leucyl aminopeptidase, N-terminal	chloroplast	--
Isoform0016746	pos:30-1376	--	0.339714	0.399922	0.339669	0.165663	0.211344	0.190616	0.525915	0.00245767	0.031524	down	GO:0006952 defense response;GO:0009607 response to biotic stimulus	GO:0016021 integral component of membrane	GO:0005516 calmodulin binding	--	K08472	--	IPR004326: Mlo-related protein	Plasma membrane	--
Isoform0016748	pos:74-1486	--	0	0	0	0	0	0.12439	inf	0	0	up	--	--	GO:0008194 UDP-glycosyltransferase activity	G: Carbohydrate transport and metabolism;C: Energy production and conversion	K08237	--	IPR002213: UDP-glucuronosyl/UDP-glucosyltransferase;IPR035595: UDP-glycosyltransferase family, conserved site	chloroplast	--
Isoform0016761	pos:81-1391	--	0	0	0	0.193883	0.158787	0.269872	inf	0	0	up	GO:0006520 cellular amino acid metabolic process;GO:0009058 biosynthetic process	--	GO:0008483 transaminase activity;GO:0030170 pyridoxal phosphate binding	E: Amino acid transport and metabolism	K00815	ko00130: Ubiquinone and other terpenoid-quinone biosynthesis;ko00270: Cysteine and methionine metabolism;ko00350: Tyrosine metabolism;ko00360: Phenylalanine metabolism;ko00400: Phenylalanine, tyrosine and tryptophan biosynthesis;ko00950: Isoquinoline alkaloid biosynthesis;ko00960: Tropane, piperidine and pyridine alkaloid biosynthesis;ko01100: Metabolic pathways;ko01110: Biosynthesis of secondary…	IPR015422: Pyridoxal phosphate-dependent transferase, small domain;IPR015421: Pyridoxal phosphate-dependent transferase, major domain;IPR005958: Tyrosine/nicotianamine aminotransferase;IPR015424: Pyridoxal phosphate-dependent transferase;IPR004839: Aminotransferase, class I/classII	Cytoplasm	--
Isoform0016763	pos:236-1681	--	0.132425	0.144261	0.156888	0.262929	0.229309	0.262492	1.74072	0.00117166	0.0218218	up	GO:0006562 proline catabolic process	--	GO:0004657 proline dehydrogenase activity	E: Amino acid transport and metabolism	K00318	ko00330: Arginine and proline metabolism;ko01100: Metabolic pathways;ko01110: Biosynthesis of secondary metabolites	IPR015659: Proline oxidase family;IPR002872: Proline dehydrogenase domain;IPR029041: FAD-linked oxidoreductase-like	chloroplast	--
Isoform0016834	pos:50-1099	--	0.691671	0.608018	0.54847	0.256043	0.352492	0.272456	0.476686	0.00487308	0.0458184	down	--	--	--	S: Function unknown	K14775	--	IPR016095: Ribosomal protein L1, 3-layer alpha/beta-sandwich;IPR028364: Ribosomal protein L1/ribosomal biogenesis protein;IPR023674: Ribosomal protein L1-like	Cytoplasm	--
Isoform0016839	pos:35-1624	--	0.280734	0.240463	0.294844	0.532699	0.62993	0.57657	2.13126	0.00082037	0.018819	up	--	GO:0016021 integral component of membrane	GO:0004497 monooxygenase activity;GO:0005506 iron ion binding;GO:0016705 oxidoreductase activity, acting on paired donors, with incorporation or reduction of molecular oxygen;GO:0020037 heme binding	Q: Secondary metabolites biosynthesis, transport and catabolism	K11868	ko00380: Tryptophan metabolism;ko01100: Metabolic pathways	IPR001128: Cytochrome P450;IPR036396: Cytochrome P450 superfamily;IPR017972: Cytochrome P450, conserved site;IPR002401: Cytochrome P450, E-class, group I	chloroplast	--
Isoform0016849	pos:413-1612	--	0	0	0	0.114333	0	0.109782	inf	0	0	up	GO:0006468 protein phosphorylation	GO:0005886 plasma membrane	GO:0004674 protein serine/threonine kinase activity;GO:0005524 ATP binding	T: Signal transduction mechanisms	K13430	ko04626: Plant-pathogen interaction	IPR017441: Protein kinase, ATP binding site;IPR000719: Protein kinase domain;IPR008271: Serine/threonine-protein kinase, active site;IPR011009: Protein kinase-like domain superfamily	Nucleus	--
Isoform0016876	pos:287-1468	--	1.78497	1.94042	1.90979	3.37168	3.03812	3.27163	1.71804	0.000217084	0.0104039	up	GO:0006086 acetyl-CoA biosynthetic process from pyruvate;GO:0006096 glycolytic process	GO:0043231 intracellular membrane-bounded organelle	GO:0004739 pyruvate dehydrogenase (acetyl-transferring) activity	C: Energy production and conversion	K00161	ko00010: Glycolysis / Gluconeogenesis;ko00020: Citrate cycle (TCA cycle);ko00620: Pyruvate metabolism;ko00785: Lipoic acid metabolism;ko01100: Metabolic pathways;ko01110: Biosynthesis of secondary metabolites;ko01200: Carbon metabolism	IPR029061: Thiamin diphosphate-binding fold;IPR017597: Pyruvate dehydrogenase (acetyl-transferring) E1 component, alpha subunit, subgroup y;IPR001017: Dehydrogenase, E1 component	Mitochondrion	--
Isoform0016900	pos:67-1572	--	2.38946	2.30255	2.24955	1.4024	1.43759	1.17244	0.578031	0.00928017	0.0639218	down	GO:0005975 carbohydrate metabolic process	GO:0009507 chloroplast	GO:0008422 beta-glucosidase activity;GO:0102726 DIMBOA glucoside beta-D-glucosidase activity	G: Carbohydrate transport and metabolism	K01188	ko00460: Cyanoamino acid metabolism;ko00500: Starch and sucrose metabolism;ko00999: Biosynthesis of various plant secondary metabolites;ko01100: Metabolic pathways;ko01110: Biosynthesis of secondary metabolites	IPR001360: Glycoside hydrolase family 1;IPR033132: Glycosyl hydrolases family 1, N-terminal conserved site;IPR017853: Glycoside hydrolase superfamily	vacuolar membrane	CS pos: 20-21. VLG-FT. Pr: 0.8415
Isoform0016905	pos:260-1786	--	0.64019	0.552571	0.669092	1.46791	1.62827	1.64055	2.54409	0.00046798	0.0150866	up	GO:0006508 proteolysis	--	GO:0004185 serine-type carboxypeptidase activity	O: Posttranslational modification, protein turnover, chaperones;E: Amino acid transport and metabolism	K16296	--	IPR029058: Alpha/Beta hydrolase fold;IPR001563: Peptidase S10, serine carboxypeptidase;IPR033124: Serine carboxypeptidases, histidine active site	Cytoplasm	--
Isoform0016967	pos:65-1498	--	0.374221	0.381067	0.402451	0.643931	0.708217	0.581806	1.67046	0.00611976	0.0512809	up	GO:0006468 protein phosphorylation	--	GO:0004707 MAP kinase activity;GO:0005524 ATP binding	T: Signal transduction mechanisms	K20535	ko04016: MAPK signaling pathway - plant	IPR000719: Protein kinase domain;IPR008271: Serine/threonine-protein kinase, active site;IPR017441: Protein kinase, ATP binding site;IPR011009: Protein kinase-like domain superfamily;IPR003527: Mitogen-activated protein (MAP) kinase, conserved site	chloroplast	--
Isoform0016987	pos:2-1534	--	7.74129	7.56973	7.34358	3.58018	3.76414	3.61871	0.48392	4.66019e-06	0.00160737	down	--	--	--	--	K12524	ko00260: Glycine, serine and threonine metabolism;ko00261: Monobactam biosynthesis;ko00270: Cysteine and methionine metabolism;ko00300: Lysine biosynthesis;ko01100: Metabolic pathways;ko01110: Biosynthesis of secondary metabolites;ko01230: Biosynthesis of amino acids	IPR002912: ACT domain;IPR036291: NAD(P)-binding domain superfamily;IPR005106: Aspartate/homoserine dehydrogenase, NAD-binding;IPR045865: ACT-like domain;IPR001342: Homoserine dehydrogenase, catalytic;IPR027795: CASTOR, ACT domain;IPR011147: Bifunctional aspartokinase/homoserine dehydrogenase;IPR019811: Homoserine dehydrogenase, conserved site	Endoplasmic reticulum	--
Isoform0017042	pos:87-1664	--	0.448472	0.391307	0.395512	0.196113	0.236212	0.220857	0.528768	0.000977477	0.0199197	down	GO:0006629 lipid metabolic process	GO:0016021 integral component of membrane	GO:0080019 fatty-acyl-CoA reductase (alcohol-forming) activity;GO:0102965 alcohol-forming fatty acyl-CoA reductase activity	I: Lipid transport and metabolism	K13356	ko00073: Cutin, suberine and wax biosynthesis;ko04146: Peroxisome	IPR013120: Fatty acyl-coenzyme A reductase, NAD-binding domain;IPR026055: Fatty acyl-CoA reductase;IPR033640: Fatty acyl-CoA reductase, C-terminal;IPR036291: NAD(P)-binding domain superfamily	Cytoplasm	--
Isoform0017107	pos:260-1543	--	4.77938	4.31096	5.4711	3.32944	2.94066	3.39143	0.663501	0.0114204	0.072774	down	--	GO:0005794 Golgi apparatus;GO:0016020 membrane;GO:0016021 integral component of membrane	--	T: Signal transduction mechanisms	K22985	--	IPR009637: Transmembrane protein GPR107/GPR108-like	Mitochondrion	--
Isoform0017159	pos:25-1458	--	0.0491791	0.0530824	0.0490793	0.172982	0.173447	0.186427	3.5209	3.91564e-06	0.00153545	up	GO:0051603 proteolysis involved in cellular protein catabolic process	GO:0110165 cellular anatomical entity	GO:0004197 cysteine-type endopeptidase activity	O: Posttranslational modification, protein turnover, chaperones	K01369	--	IPR046427: Legumain prodomain superfamily;IPR001096: Peptidase C13, legumain;IPR043577: Asparaginyl endopeptidase	vacuolar membrane	CS pos: 23-24. ARA-RL. Pr: 0.8388
Isoform0017191	pos:1-1605	--	4.47485	3.59167	3.72565	7.0952	6.46886	5.27854	1.59789	0.0153777	0.0843729	up	GO:0046274 lignin catabolic process	GO:0048046 apoplast	GO:0005507 copper ion binding;GO:0016491 oxidoreductase activity;GO:0052716 hydroquinone:oxygen oxidoreductase activity	Q: Secondary metabolites biosynthesis, transport and catabolism	K05909	--	IPR008972: Cupredoxin;IPR002355: Multicopper oxidase, copper-binding site;IPR034285: Laccase, second cupredoxin domain;IPR011707: Multicopper oxidase, N-terminal;IPR017761: Laccase;IPR001117: Multicopper oxidase, second cupredoxin domain;IPR045087: Multicopper oxidase;IPR033138: Multicopper oxidases, conserved site;IPR034288: Laccase, first cupredoxin domain;IPR011706: Multicopper oxidase, C-term…	chloroplast	--
Isoform0017198	pos:91-1599	--	0	0	0	0	0.0877539	0.19687	inf	0	0	up	--	--	GO:0016491 oxidoreductase activity;GO:0050660 flavin adenine dinucleotide binding	Q: Secondary metabolites biosynthesis, transport and catabolism	K13366	ko00330: Arginine and proline metabolism;ko00410: beta-Alanine metabolism;ko01100: Metabolic pathways	IPR036188: FAD/NAD(P)-binding domain superfamily;IPR002937: Amine oxidase	chloroplast	CS pos: 20-21. QHA-SI. Pr: 0.2948
Isoform0017204	pos:86-796	--	0.933474	1.04697	1.22044	1.63378	1.58021	1.63856	1.516	0.0299054	0.123407	up	--	--	GO:0042393 histone binding	D: Cell cycle control, cell division, chromosome partitioning;R: General function prediction only	--	--	IPR001611: Leucine-rich repeat;IPR032675: Leucine-rich repeat domain superfamily;IPR045081: Acidic leucine-rich nuclear phosphoprotein 32	Cytoplasm	--
Isoform0017211	pos:297-1538	--	0.257658	0.271769	0.229613	0.684584	0.686748	0.646463	2.65835	0.000790109	0.0184825	up	--	--	--	--	--	--	IPR004328: BRO1 domain;IPR038499: BRO1 domain superfamily;IPR038898: BRO1 domain-containing protein BROX	Cytoplasm	--
Isoform0017220	pos:98-1558	--	0.135308	0.138312	0	0.592343	0.625002	0.599016	4.42551	5.23523e-06	0.00170513	up	GO:0006865 amino acid transport	GO:0005886 plasma membrane;GO:0016021 integral component of membrane	--	E: Amino acid transport and metabolism	K24917	--	IPR013057: Amino acid transporter, transmembrane domain	Plasma membrane	--
Isoform0017231	pos:79-1629	--	0.431563	0.389496	0.412564	0.234242	0.264122	0.254867	0.610584	0.000518925	0.015613	down	--	GO:0016021 integral component of membrane	--	S: Function unknown	--	--	IPR009637: Transmembrane protein GPR107/GPR108-like	Plasma membrane	CS pos: 29-30. AEA-SI. Pr: 0.5471
Isoform0017243	pos:29-1579	--	0.346144	0.368565	0.321576	0.642803	0.507836	0.569414	1.65983	0.00628795	0.0518177	up	--	--	GO:0016491 oxidoreductase activity;GO:0071949 FAD binding	--	K22395	ko00940: Phenylpropanoid biosynthesis;ko01100: Metabolic pathways;ko01110: Biosynthesis of secondary metabolites	IPR016169: FAD-binding, type PCMH, subdomain 2;IPR016167: FAD-binding, type PCMH, subdomain 1;IPR036318: FAD-binding, type PCMH-like superfamily;IPR016166: FAD-binding domain, PCMH-type;IPR012951: Berberine/berberine-like;IPR006094: FAD linked oxidase, N-terminal	Endoplasmic reticulum	CS pos: 26-27. SLA-AS. Pr: 0.5583
Isoform0017265	pos:92-1462	--	3.8655	3.01743	3.12743	2.22394	2.13473	2.10974	0.646171	0.026616	0.115959	down	--	GO:0016021 integral component of membrane	GO:0015098 molybdate ion transmembrane transporter activity	G: Carbohydrate transport and metabolism	K24175	--	IPR008509: Molybdate-anion transporter;IPR036259: MFS transporter superfamily	Plasma membrane	CS pos: 18-19. VAG-LE. Pr: 0.4504
Isoform0017336	pos:3-1535	--	0	0	0	0.215414	0	0	inf	0	0	up	GO:0006633 fatty acid biosynthetic process	GO:0016021 integral component of membrane	GO:0016747 acyltransferase activity, transferring groups other than amino-acyl groups	--	K15397	ko00062: Fatty acid elongation;ko01100: Metabolic pathways;ko01110: Biosynthesis of secondary metabolites;ko04626: Plant-pathogen interaction	IPR013601: FAE1/Type III polyketide synthase-like protein;IPR012392: Very-long-chain 3-ketoacyl-CoA synthase;IPR016039: Thiolase-like;IPR013747: Beta-ketoacyl-[acyl-carrier-protein] synthase III, C-terminal	Plasma membrane	--
Isoform0017369	pos:2-1510	--	1.46294	1.25645	1.30319	0.49531	0.581247	0.471938	0.38495	0.00041891	0.0143555	down	GO:0009088 threonine biosynthetic process;GO:0009089 lysine biosynthetic process via diaminopimelate;GO:0009090 homoserine biosynthetic process;GO:0016310 phosphorylation	--	GO:0004072 aspartate kinase activity;GO:0005524 ATP binding	E: Amino acid transport and metabolism	K00928	ko00260: Glycine, serine and threonine metabolism;ko00261: Monobactam biosynthesis;ko00270: Cysteine and methionine metabolism;ko00300: Lysine biosynthesis;ko01100: Metabolic pathways;ko01110: Biosynthesis of secondary metabolites;ko01210: 2-Oxocarboxylic acid metabolism;ko01230: Biosynthesis of amino acids	IPR002912: ACT domain;IPR018042: Aspartate kinase, conserved site;IPR045865: ACT-like domain;IPR001048: Aspartate/glutamate/uridylate kinase;IPR036393: Acetylglutamate kinase-like superfamily;IPR042199: Aspartokinase/Bifunctional aspartokinase/homoserine dehydrogenase, catalytic domain;IPR041746: Lysine-sensitive aspartokinase catalytic domain;IPR005260: Aspartate kinase, monofunctional class;IPR…	Cytoplasm	--
Isoform0017374	pos:23-1405	--	0.577718	0.537487	0.612479	0.243973	0.293086	0.289081	0.478178	0.0010153	0.0204316	down	--	--	--	R: General function prediction only	--	--	IPR002110: Ankyrin repeat;IPR036770: Ankyrin repeat-containing domain superfamily	chloroplast	--
Isoform0017423	pos:3-1514	--	1.51303	1.68729	1.70926	1.09648	1.00677	0.927727	0.617359	0.00174769	0.0259441	down	GO:0006084 acetyl-CoA metabolic process;GO:0010142 farnesyl diphosphate biosynthetic process, mevalonate pathway;GO:0016126 sterol biosynthetic process	--	GO:0004421 hydroxymethylglutaryl-CoA synthase activity	I: Lipid transport and metabolism	K01641	ko00280: Valine, leucine and isoleucine degradation;ko00650: Butanoate metabolism;ko00900: Terpenoid backbone biosynthesis;ko01100: Metabolic pathways;ko01110: Biosynthesis of secondary metabolites	IPR013746: Hydroxymethylglutaryl-coenzyme A synthase, C-terminal domain;IPR000590: Hydroxymethylglutaryl-coenzyme A synthase, active site;IPR013528: Hydroxymethylglutaryl-coenzyme A synthase, N-terminal;IPR016039: Thiolase-like;IPR010122: Hydroxymethylglutaryl-CoA synthase, eukaryotic	Nucleus	--
Isoform0017433	pos:106-1575	--	1.41991	1.5083	1.52978	2.12319	2.33046	2.32413	1.52037	0.000591583	0.0157939	up	--	--	GO:0008194 UDP-glycosyltransferase activity	G: Carbohydrate transport and metabolism;C: Energy production and conversion	K22771	ko00944: Flavone and flavonol biosynthesis	IPR002213: UDP-glucuronosyl/UDP-glucosyltransferase;IPR035595: UDP-glycosyltransferase family, conserved site	Cytoplasm	--
Isoform0017437	pos:2-1510	--	1.44841	1.62525	1.50846	0.574606	0.611781	0.513543	0.370992	0.000219184	0.0104039	down	GO:0030244 cellulose biosynthetic process;GO:0071669 plant-type cell wall organization or biogenesis	GO:0016021 integral component of membrane	GO:0016760 cellulose synthase (UDP-forming) activity	--	K10999	--	IPR005150: Cellulose synthase;IPR029044: Nucleotide-diphospho-sugar transferases	Plasma membrane	--
Isoform0017443	pos:2-1162	--	0.0174194	0.016678	0	0	0	0	0	0	0	down	--	GO:0016021 integral component of membrane	GO:0003677 DNA binding	--	--	--	--	Golgi apparatus	--
Isoform0017466	pos:39-1646	--	0	0.225041	0.204895	0.148838	0.104343	0.146631	0.619956	0.0389877	0.143073	down	--	--	--	--	K22395	ko00940: Phenylpropanoid biosynthesis;ko01100: Metabolic pathways;ko01110: Biosynthesis of secondary metabolites	IPR016169: FAD-binding, type PCMH, subdomain 2;IPR016166: FAD-binding domain, PCMH-type;IPR012951: Berberine/berberine-like;IPR036318: FAD-binding, type PCMH-like superfamily;IPR006094: FAD linked oxidase, N-terminal;IPR016167: FAD-binding, type PCMH, subdomain 1	chloroplast	--
Isoform0017490	pos:12-1577	--	0.160026	0.281619	0.210445	0.550769	0.369404	0.672068	2.44175	0.0209269	0.10073	up	--	--	GO:0016491 oxidoreductase activity;GO:0071949 FAD binding	--	K22395	ko00940: Phenylpropanoid biosynthesis;ko01100: Metabolic pathways;ko01110: Biosynthesis of secondary metabolites	IPR016169: FAD-binding, type PCMH, subdomain 2;IPR012951: Berberine/berberine-like;IPR036318: FAD-binding, type PCMH-like superfamily;IPR016167: FAD-binding, type PCMH, subdomain 1;IPR006094: FAD linked oxidase, N-terminal;IPR016166: FAD-binding domain, PCMH-type	chloroplast	CS pos: 21-22. SLA-ST. Pr: 0.8347
Isoform0017500	pos:1-1020	--	0.980333	1.07289	0.942239	1.64543	1.68412	1.50923	1.61537	0.000772992	0.0184234	up	--	--	GO:0005506 iron ion binding;GO:0016491 oxidoreductase activity;GO:0051537 2 iron, 2 sulfur cluster binding;GO:0071949 FAD binding	F: Nucleotide transport and metabolism	K00106	ko00230: Purine metabolism;ko00232: Caffeine metabolism;ko01100: Metabolic pathways;ko01110: Biosynthesis of secondary metabolites;ko01232: Nucleotide metabolism;ko04146: Peroxisome	IPR046867: Aldehyde oxidase/xanthine dehydrogenase, second molybdopterin binding domain;IPR037165: Aldehyde oxidase/xanthine dehydrogenase, molybdopterin binding domain superfamily;IPR008274: Aldehyde oxidase/xanthine dehydrogenase, first molybdopterin binding domain	chloroplast	--
Isoform0017530	pos:284-1615	--	1.12049	1.16479	1.07076	0.796602	0.703685	0.628368	0.634276	0.0135625	0.0787712	down	--	GO:0005783 endoplasmic reticulum	--	O: Posttranslational modification, protein turnover, chaperones	K03686	--	IPR036869: Chaperone J-domain superfamily;IPR001623: DnaJ domain;IPR018253: DnaJ domain, conserved site	Nucleus	--
Isoform0017544	pos:12-1607	--	0.912566	0.972538	1.03035	1.66071	1.56315	1.62476	1.66308	0.00106114	0.0208238	up	--	GO:0016021 integral component of membrane	GO:0004497 monooxygenase activity;GO:0005506 iron ion binding;GO:0016705 oxidoreductase activity, acting on paired donors, with incorporation or reduction of molecular oxygen;GO:0020037 heme binding	Q: Secondary metabolites biosynthesis, transport and catabolism	K24542	--	IPR002401: Cytochrome P450, E-class, group I;IPR001128: Cytochrome P450;IPR036396: Cytochrome P450 superfamily;IPR017972: Cytochrome P450, conserved site	chloroplast	--
Isoform0017563	pos:206-1324	--	0.14915	0.103659	0.127743	0.0561256	0.0644162	0.0522838	0.454145	0.00621909	0.0517982	down	--	GO:0005769 early endosome;GO:0005886 plasma membrane;GO:0016021 integral component of membrane	GO:0015095 magnesium ion transmembrane transporter activity	S: Function unknown	K22733	--	IPR008521: Magnesium transporter NIPA	chloroplast	--
Isoform0017612	pos:131-1489	--	5.17136	5.23973	5.01481	7.98955	7.43083	8.09205	1.52422	0.00088399	0.0191082	up	--	--	--	--	--	--	IPR027443: Isopenicillin N synthase-like superfamily	chloroplast	--
Isoform0017665	pos:199-1641	--	0.448942	0.405516	0.426089	0.283619	0.246625	0.249169	0.608657	0.00149121	0.0241681	down	--	GO:0016021 integral component of membrane	--	--	--	--	--	Cytoplasm	--
Isoform0017697	pos:384-1499	--	0.539257	0.439777	0.37926	0.287605	0.288238	0.281046	0.630857	0.0469079	0.159951	down	--	GO:0012505 endomembrane system;GO:0016021 integral component of membrane	GO:0004190 aspartic-type endopeptidase activity	S: Function unknown	K09598	--	IPR007369: Peptidase A22B, signal peptide peptidase;IPR006639: Presenilin/signal peptide peptidase	Plasma membrane	--
Isoform0017754	pos:74-1624	--	0.443006	0.39393	0.411556	0.746436	0.938984	0.873952	2.04997	0.00269007	0.0330879	up	--	GO:0016021 integral component of membrane	GO:0004497 monooxygenase activity;GO:0005506 iron ion binding;GO:0016705 oxidoreductase activity, acting on paired donors, with incorporation or reduction of molecular oxygen;GO:0020037 heme binding	Q: Secondary metabolites biosynthesis, transport and catabolism	K24542	--	IPR001128: Cytochrome P450;IPR036396: Cytochrome P450 superfamily;IPR002401: Cytochrome P450, E-class, group I;IPR017972: Cytochrome P450, conserved site	chloroplast	CS pos: 22-23. VLG-KV. Pr: 0.6583
Isoform0017810	pos:161-1681	--	0	0	0	0	0.0486357	0	inf	0	0	up	--	GO:0016021 integral component of membrane	--	--	--	--	IPR004158: Protein of unknown function DUF247, plant	Nucleus	--
Isoform0017826	pos:3-1472	--	14.2156	12.0449	13.5741	20.1839	23.5409	23.1095	1.6778	0.00171114	0.0257314	up	--	--	--	--	--	--	IPR034081: AAA domain-containing protein, R3H domain;IPR027417: P-loop containing nucleoside triphosphate hydrolase;IPR045735: Stage III sporulation protein AA, AAA+ ATPase domain	Nucleus	--
Isoform0017850	pos:141-1487	--	2.23404	1.72683	2.1662	3.85572	3.61419	3.86342	1.84972	0.0121333	0.0748596	up	GO:0006508 proteolysis	--	GO:0004190 aspartic-type endopeptidase activity	O: Posttranslational modification, protein turnover, chaperones	K22683	--	IPR032861: Xylanase inhibitor, N-terminal;IPR001969: Aspartic peptidase, active site;IPR021109: Aspartic peptidase domain superfamily;IPR033121: Peptidase family A1 domain;IPR034161: Pepsin-like domain, plant;IPR032799: Xylanase inhibitor, C-terminal	chloroplast	CS pos: 27-28. GLA-AT. Pr: 0.3919
Isoform0017861	pos:2-1624	--	9.48524	8.88568	8.04445	5.50017	5.11448	4.92847	0.588412	0.00143537	0.0238236	down	GO:0034620 cellular response to unfolded protein;GO:0042026 protein refolding;GO:0051085 chaperone cofactor-dependent protein refolding	GO:0005737 cytoplasm	GO:0005524 ATP binding;GO:0016887 ATP hydrolysis activity;GO:0031072 heat shock protein binding;GO:0044183 protein folding chaperone;GO:0051082 unfolded protein binding;GO:0051787 misfolded protein binding;GO:0140662 ATP-dependent protein folding chaperone	O: Posttranslational modification, protein turnover, chaperones	K03283	ko03040: Spliceosome;ko04141: Protein processing in endoplasmic reticulum;ko04144: Endocytosis	IPR029048: Heat shock protein 70kD, C-terminal domain superfamily;IPR018181: Heat shock protein 70, conserved site;IPR013126: Heat shock protein 70 family;IPR029047: Heat shock protein 70kD, peptide-binding domain superfamily;IPR043129: ATPase, nucleotide binding domain	Cytoplasm	--
Isoform0017899	pos:68-1498	--	0.629419	0.687078	0.736266	8.89388	8.68837	9.13186	13.0137	9.32669e-05	0.00698285	up	--	--	GO:0008483 transaminase activity;GO:0030170 pyridoxal phosphate binding	E: Amino acid transport and metabolism	K00827	ko00250: Alanine, aspartate and glutamate metabolism;ko00260: Glycine, serine and threonine metabolism;ko00270: Cysteine and methionine metabolism;ko00280: Valine, leucine and isoleucine degradation;ko01100: Metabolic pathways;ko01110: Biosynthesis of secondary metabolites	IPR005814: Aminotransferase class-III;IPR015421: Pyridoxal phosphate-dependent transferase, major domain;IPR015424: Pyridoxal phosphate-dependent transferase;IPR015422: Pyridoxal phosphate-dependent transferase, small domain	Mitochondrion	--
Isoform0017949	pos:35-1525	--	1.56376	1.69717	1.63443	0.505517	0.506706	0.421835	0.292942	0.000754436	0.0181065	down	GO:0010143 cutin biosynthetic process	GO:0016020 membrane;GO:0016021 integral component of membrane	GO:0016791 phosphatase activity;GO:0090447 glycerol-3-phosphate 2-O-acyltransferase activity	--	K13508	ko00561: Glycerolipid metabolism;ko00564: Glycerophospholipid metabolism;ko01100: Metabolic pathways;ko01110: Biosynthesis of secondary metabolites	IPR002123: Phospholipid/glycerol acyltransferase;IPR036412: HAD-like superfamily;IPR023214: HAD superfamily	Plasma membrane	--
Isoform0017951	pos:1-1557	--	0.940999	0.786612	0.775652	0.252461	0.37362	0.293419	0.367321	0.00397874	0.0413982	down	--	GO:0016021 integral component of membrane	GO:0016491 oxidoreductase activity	P: Inorganic ion transport and metabolism;Q: Secondary metabolites biosynthesis, transport and catabolism	K00521	--	IPR017927: FAD-binding domain, ferredoxin reductase-type;IPR017938: Riboflavin synthase-like beta-barrel;IPR013112: FAD-binding 8;IPR039261: Ferredoxin-NADP reductase (FNR), nucleotide-binding domain;IPR013121: Ferric reductase, NAD binding domain;IPR013130: Ferric reductase transmembrane component-like domain	Plasma membrane	--
Isoform0017994	pos:177-1472	--	1.68318	1.58108	1.70063	3.24274	2.96619	3.21023	1.89715	8.19424e-05	0.00671927	up	GO:0016042 lipid catabolic process	--	GO:0016298 lipase activity	I: Lipid transport and metabolism	--	--	IPR002641: Patatin-like phospholipase domain;IPR016035: Acyl transferase/acyl hydrolase/lysophospholipase	chloroplast	--
Isoform0017999	pos:180-1508	--	0.607079	0.736155	0.737314	5.93028	5.94324	5.65952	8.42713	0.000491493	0.0153882	up	GO:0006012 galactose metabolic process	--	GO:0003978 UDP-glucose 4-epimerase activity	M: Cell wall/membrane/envelope biogenesis	K01784	ko00052: Galactose metabolism;ko00520: Amino sugar and nucleotide sugar metabolism;ko01100: Metabolic pathways;ko01250: Biosynthesis of nucleotide sugars	IPR005886: UDP-glucose 4-epimerase;IPR036291: NAD(P)-binding domain superfamily;IPR016040: NAD(P)-binding domain	Mitochondrion	--
Isoform0018002	pos:55-1584	--	0.542099	0.519572	0.494203	1.04437	1.19712	0.999139	2.08283	0.00140943	0.0238236	up	--	GO:0016021 integral component of membrane	GO:0004497 monooxygenase activity;GO:0005506 iron ion binding;GO:0016705 oxidoreductase activity, acting on paired donors, with incorporation or reduction of molecular oxygen;GO:0020037 heme binding	Q: Secondary metabolites biosynthesis, transport and catabolism;I: Lipid transport and metabolism	K20495	ko00071: Fatty acid degradation;ko00073: Cutin, suberine and wax biosynthesis;ko01100: Metabolic pathways	IPR001128: Cytochrome P450;IPR036396: Cytochrome P450 superfamily;IPR002401: Cytochrome P450, E-class, group I	chloroplast	--
Isoform0018044	pos:108-1280	--	0.824079	0.736866	0.762868	1.32819	1.0802	1.42511	1.64966	0.0165473	0.0874445	up	GO:0008654 phospholipid biosynthetic process	GO:0016021 integral component of membrane	GO:0016780 phosphotransferase activity, for other substituted phosphate groups	I: Lipid transport and metabolism	K00993	ko00440: Phosphonate and phosphinate metabolism;ko00564: Glycerophospholipid metabolism;ko00565: Ether lipid metabolism;ko01100: Metabolic pathways;ko01110: Biosynthesis of secondary metabolites	IPR014472: Choline/ethanolamine phosphotransferase;IPR000462: CDP-alcohol phosphatidyltransferase;IPR043130: CDP-alcohol phosphatidyltransferase, transmembrane domain	Plasma membrane	--
Isoform0018061	pos:131-1321	--	2.59596	2.60009	2.34648	1.26255	1.11906	1.18079	0.472308	0.000104016	0.00721083	down	GO:0006629 lipid metabolic process	GO:0016021 integral component of membrane	GO:0016717 oxidoreductase activity, acting on paired donors, with oxidation of a pair of donors resulting in the reduction of molecular oxygen to two molecules of water	--	K10256	ko01040: Biosynthesis of unsaturated fatty acids;ko01100: Metabolic pathways;ko01212: Fatty acid metabolism	IPR021863: Fatty acid desaturase, N-terminal;IPR005804: Fatty acid desaturase domain	Plasma membrane	--
Isoform0018065	pos:35-1588	--	0.141496	0	0.127068	0	0	0	0	0	0	down	--	--	GO:0004499 N,N-dimethylaniline monooxygenase activity;GO:0050660 flavin adenine dinucleotide binding;GO:0050661 NADP binding	Q: Secondary metabolites biosynthesis, transport and catabolism	K00485	ko00430: Taurine and hypotaurine metabolism;ko01100: Metabolic pathways	IPR036188: FAD/NAD(P)-binding domain superfamily;IPR020946: Flavin monooxygenase-like;IPR000960: Flavin monooxygenase FMO	chloroplast	--
Isoform0018081	pos:504-1604	--	0	0	0	3.42094	0	3.70406	inf	0	0	up	GO:0009628 response to abiotic stimulus;GO:0016567 protein ubiquitination	GO:0110165 cellular anatomical entity	--	D: Cell cycle control, cell division, chromosome partitioning;R: General function prediction only	K10523	--	IPR002083: MATH/TRAF domain;IPR000210: BTB/POZ domain;IPR011333: SKP1/BTB/POZ domain superfamily;IPR045005: BTB/POZ and MATH domain-containing protein 1-6;IPR008974: TRAF-like	chloroplast	--
Isoform0018122	pos:217-1617	--	0.839976	0.981759	0.902281	1.32539	1.45976	1.51047	1.57694	0.00170618	0.0257314	up	--	--	GO:0008194 UDP-glycosyltransferase activity	G: Carbohydrate transport and metabolism;C: Energy production and conversion	K08237	--	IPR002213: UDP-glucuronosyl/UDP-glucosyltransferase;IPR035595: UDP-glycosyltransferase family, conserved site	Cytoplasm	--
Isoform0018160	pos:388-1434	--	0.277216	0.286113	0.281262	0.145433	0.14571	0.144695	0.516034	9.52827e-05	0.00705706	down	--	--	--	G: Carbohydrate transport and metabolism;E: Amino acid transport and metabolism	K26224	--	IPR004853: Sugar phosphate transporter domain	vacuolar membrane	--
Isoform0018175	pos:344-1486	--	0.726043	0.672216	0.684162	0.419423	0.412355	0.426541	0.604258	0.000543842	0.0156691	down	--	GO:0005737 cytoplasm;GO:0005874 microtubule	GO:0008017 microtubule binding	--	--	--	IPR044806: Protein WAVE-DAMPENED 2-like;IPR027329: TPX2, C-terminal	Nucleus	--
Isoform0018204	pos:295-1449	--	1.59299	1.16317	1.25469	3.28385	3.5146	3.56873	2.58478	0.00649967	0.0526359	up	--	--	GO:0016747 acyltransferase activity, transferring groups other than amino-acyl groups	--	K19747	--	IPR023213: Chloramphenicol acetyltransferase-like domain superfamily	chloroplast	--
Isoform0018232	pos:111-1475	--	0.38882	0.346752	0.371459	0.204728	0.168992	0.228332	0.543844	0.0115963	0.0730787	down	--	GO:0043229 intracellular organelle	--	W: Extracellular structures	K14797	--	IPR007955: Bystin	Cytoplasm	--
Isoform0018256	pos:155-1756	--	0	0.0951607	0.0658051	0	0	0	0	0	0	down	GO:0051382 kinetochore assembly	GO:0000776 kinetochore;GO:0005634 nucleus	GO:0019237 centromeric DNA binding	--	--	--	IPR028386: Centromere protein C/Mif2/cnp3	Nucleus	--
Isoform0018283	pos:4-1374	--	4.49692	4.30496	4.29218	6.96498	6.79677	6.85484	1.5745	0.000152023	0.00824513	up	GO:0006470 protein dephosphorylation	--	GO:0017018 myosin phosphatase activity;GO:0046872 metal ion binding	T: Signal transduction mechanisms	K17506	--	IPR036457: PPM-type phosphatase-like domain superfamily;IPR001932: PPM-type phosphatase-like domain	chloroplast	--
Isoform0018287	pos:81-1568	--	0	0	0	0.080112	0	0	inf	0	0	up	--	GO:0005901 caveola	--	U: Intracellular trafficking, secretion, and vesicular transport;Z: Cytoskeleton	K07192	--	IPR027705: Flotillin family;IPR001107: Band 7 domain;IPR036013: Band 7/SPFH domain superfamily	Cytoplasm	--
Isoform0018367	pos:36-1550	--	0.155275	0.203327	0.204444	0.317005	0.316266	0.445084	1.91522	0.012658	0.0762876	up	--	--	GO:0008194 UDP-glycosyltransferase activity	G: Carbohydrate transport and metabolism;C: Energy production and conversion	K23452	ko00908: Zeatin biosynthesis;ko01110: Biosynthesis of secondary metabolites	IPR002213: UDP-glucuronosyl/UDP-glucosyltransferase;IPR035595: UDP-glycosyltransferase family, conserved site	chloroplast	--
Isoform0018403	pos:7-1353	--	1.08009	1.37334	1.07806	0.661312	0.614062	0.483874	0.498161	0.00522838	0.0476621	down	GO:0009813 flavonoid biosynthetic process	--	GO:0016210 naringenin-chalcone synthase activity;GO:0102128 chalcone synthase activity	--	K00660	ko00941: Flavonoid biosynthesis;ko00960: Tropane, piperidine and pyridine alkaloid biosynthesis;ko01100: Metabolic pathways;ko01110: Biosynthesis of secondary metabolites;ko04712: Circadian rhythm - plant	IPR016039: Thiolase-like;IPR018088: Chalcone/stilbene synthase, active site;IPR012328: Chalcone/stilbene synthase, C-terminal;IPR011141: Polyketide synthase, type III;IPR001099: Chalcone/stilbene synthase, N-terminal	Extracell	--
Isoform0018419	pos:93-1517	--	0.784017	0.887743	0.863665	1.79706	1.76865	1.58171	2.0302	0.000216193	0.0104039	up	--	--	GO:0008194 UDP-glycosyltransferase activity	G: Carbohydrate transport and metabolism;C: Energy production and conversion	K13692	--	IPR002213: UDP-glucuronosyl/UDP-glucosyltransferase;IPR035595: UDP-glycosyltransferase family, conserved site	chloroplast	--
Isoform0018443	pos:44-1450	--	5.32505	5.88274	5.8275	3.0761	2.83325	2.8651	0.515075	0.000112015	0.00721083	down	GO:0009097 isoleucine biosynthetic process;GO:0009099 valine biosynthetic process	GO:0005737 cytoplasm	GO:1990610 acetolactate synthase regulator activity	E: Amino acid transport and metabolism	K01653	ko00290: Valine, leucine and isoleucine biosynthesis;ko00650: Butanoate metabolism;ko00660: C5-Branched dibasic acid metabolism;ko00770: Pantothenate and CoA biosynthesis;ko01100: Metabolic pathways;ko01110: Biosynthesis of secondary metabolites;ko01210: 2-Oxocarboxylic acid metabolism;ko01230: Biosynthesis of amino acids	IPR004789: Acetolactate synthase, small subunit;IPR002912: ACT domain;IPR045865: ACT-like domain;IPR039557: AHAS, ACT domain;IPR027271: Acetolactate synthase/Transcription factor NikR, C-terminal;IPR019455: Acetolactate synthase, small subunit, C-terminal	chloroplast	--
Isoform0018447	pos:4-1485	--	0.571654	0.546742	0.733376	0.3987	0.387751	0.326908	0.601239	0.0138417	0.0793851	down	--	GO:0005730 nucleolus	--	Y: Nuclear structure	--	--	IPR006594: LIS1 homology motif;IPR007718: Srp40, C-terminal	chloroplast	--
Isoform0018455	pos:138-851	--	0.452925	0.490036	0.565169	1.0041	1.08049	1.02866	2.06431	0.00418275	0.0423687	up	GO:0006826 iron ion transport;GO:0006880 intracellular sequestering of iron ion	GO:0005737 cytoplasm;GO:0009507 chloroplast	GO:0004322 ferroxidase activity;GO:0008198 ferrous iron binding;GO:0008199 ferric iron binding	P: Inorganic ion transport and metabolism	K00522	--	IPR009078: Ferritin-like superfamily;IPR008331: Ferritin/DPS protein domain;IPR009040: Ferritin-like diiron domain;IPR012347: Ferritin-like;IPR001519: Ferritin	chloroplast	--
Isoform0018456	pos:23-1564	--	1.92679	2.33695	2.2759	4.5787	4.43073	4.00133	1.98952	0.0012851	0.0230173	up	--	GO:0016021 integral component of membrane	GO:0004497 monooxygenase activity;GO:0005506 iron ion binding;GO:0016705 oxidoreductase activity, acting on paired donors, with incorporation or reduction of molecular oxygen;GO:0020037 heme binding	Q: Secondary metabolites biosynthesis, transport and catabolism	K11868	ko00380: Tryptophan metabolism;ko01100: Metabolic pathways	IPR036396: Cytochrome P450 superfamily;IPR001128: Cytochrome P450;IPR017972: Cytochrome P450, conserved site;IPR002401: Cytochrome P450, E-class, group I	Cytoplasm	--
Isoform0018502	pos:46-1584	--	0	0	0	0.222903	0	0	inf	0	0	up	--	GO:0016021 integral component of membrane	GO:0004497 monooxygenase activity;GO:0005506 iron ion binding;GO:0016705 oxidoreductase activity, acting on paired donors, with incorporation or reduction of molecular oxygen;GO:0020037 heme binding	Q: Secondary metabolites biosynthesis, transport and catabolism;I: Lipid transport and metabolism	K20665	--	IPR017972: Cytochrome P450, conserved site;IPR036396: Cytochrome P450 superfamily;IPR002401: Cytochrome P450, E-class, group I;IPR001128: Cytochrome P450	chloroplast	--
Isoform0018510	pos:136-1473	--	0.482965	0.542623	0.528833	0.356627	0.357502	0.314917	0.662012	0.00185328	0.0267618	down	--	--	--	R: General function prediction only	--	--	IPR037119: Haem oxygenase HugZ-like superfamily	Mitochondrion	--
Isoform0018521	pos:268-1350	--	1.78534	1.91177	1.84924	0.416708	0.6314	0.531061	0.284722	0.00760784	0.0573335	down	GO:0006629 lipid metabolic process	GO:0016021 integral component of membrane	GO:0016717 oxidoreductase activity, acting on paired donors, with oxidation of a pair of donors resulting in the reduction of molecular oxygen to two molecules of water	--	K10257	--	IPR005804: Fatty acid desaturase domain;IPR021863: Fatty acid desaturase, N-terminal	Plasma membrane	--
Isoform0018538	pos:159-1301	--	2.10585	2.12611	1.64739	1.20815	1.26404	1.27497	0.637342	0.0295623	0.123005	down	--	GO:0016021 integral component of membrane	--	G: Carbohydrate transport and metabolism;E: Amino acid transport and metabolism	K15285	--	IPR004853: Sugar phosphate transporter domain	Plasma membrane	--
Isoform0018576	pos:78-1418	--	0.426356	0.375989	0.428239	0.241435	0.210999	0.205873	0.534955	0.000736431	0.0180517	down	--	--	--	L: Replication, recombination and repair;T: Signal transduction mechanisms	K25656	--	IPR006050: DNA photolyase, N-terminal;IPR036134: Cryptochrome/DNA photolyase, FAD-binding domain-like superfamily;IPR002081: Cryptochrome/DNA photolyase class 1;IPR036155: Cryptochrome/photolyase, N-terminal domain superfamily;IPR014729: Rossmann-like alpha/beta/alpha sandwich fold	Nucleus	--
Isoform0018591	pos:276-1298	--	6.03359	5.60987	5.60215	3.5871	3.45573	3.59157	0.616644	0.000409455	0.0142441	down	GO:0000105 histidine biosynthetic process	GO:0005737 cytoplasm	GO:0000287 magnesium ion binding;GO:0003879 ATP phosphoribosyltransferase activity	E: Amino acid transport and metabolism	K00765	ko00340: Histidine metabolism;ko01100: Metabolic pathways;ko01110: Biosynthesis of secondary metabolites;ko01230: Biosynthesis of amino acids	IPR013115: Histidine biosynthesis HisG, C-terminal;IPR018198: ATP phosphoribosyltransferase, conserved site;IPR013820: ATP phosphoribosyltransferase, catalytic domain;IPR015867: Nitrogen regulatory protein PII/ATP phosphoribosyltransferase, C-terminal;IPR020621: ATP phosphoribosyltransferase HisG, long form;IPR011322: Nitrogen regulatory PII-like, alpha/beta;IPR001348: ATP phosphoribosyltransfera…	chloroplast	--
Isoform0018603	pos:83-1570	--	0.97962	1.13483	1.06543	1.791	1.88239	1.81239	1.72515	0.00282697	0.034249	up	--	--	GO:0008194 UDP-glycosyltransferase activity	G: Carbohydrate transport and metabolism;C: Energy production and conversion	K13496	ko00908: Zeatin biosynthesis;ko01110: Biosynthesis of secondary metabolites	IPR002213: UDP-glucuronosyl/UDP-glucosyltransferase;IPR035595: UDP-glycosyltransferase family, conserved site	Cytoplasm	--
Isoform0018606	pos:3-1550	--	0	0.116932	0	0	0	0	0	0	0	down	--	GO:0016021 integral component of membrane	GO:0004497 monooxygenase activity;GO:0005506 iron ion binding;GO:0016705 oxidoreductase activity, acting on paired donors, with incorporation or reduction of molecular oxygen;GO:0020037 heme binding	Q: Secondary metabolites biosynthesis, transport and catabolism	K11868	ko00380: Tryptophan metabolism;ko01100: Metabolic pathways	IPR036396: Cytochrome P450 superfamily;IPR017972: Cytochrome P450, conserved site;IPR001128: Cytochrome P450;IPR002401: Cytochrome P450, E-class, group I	Plasma membrane	--
Isoform0018640	pos:103-1443	--	10.1656	11.0492	12.3693	7.58114	6.48131	6.0294	0.598254	0.00470979	0.0452377	down	GO:0007017 microtubule-based process	GO:0005874 microtubule	GO:0005200 structural constituent of cytoskeleton;GO:0005525 GTP binding	Z: Cytoskeleton	K07375	ko04145: Phagosome;ko04814: Motor proteins	IPR036525: Tubulin/FtsZ, GTPase domain superfamily;IPR000217: Tubulin;IPR037103: Tubulin/FtsZ-like, C-terminal domain;IPR003008: Tubulin/FtsZ, GTPase domain;IPR008280: Tubulin/FtsZ, C-terminal;IPR013838: Beta tubulin, autoregulation binding site;IPR023123: Tubulin, C-terminal;IPR002453: Beta tubulin;IPR017975: Tubulin, conserved site;IPR018316: Tubulin/FtsZ, 2-layer sandwich domain	Nucleus	--
Isoform0018642	pos:246-1487	--	2.31692	2.06653	2.23085	1.36022	1.27463	1.37027	0.605525	0.000501676	0.0154957	down	--	--	GO:0005096 GTPase activator activity	T: Signal transduction mechanisms	K12493	ko04144: Endocytosis	IPR037278: ARFGAP/RecO-like zinc finger;IPR001164: Arf GTPase activating protein;IPR038508: ArfGAP domain superfamily	Nucleus	--
Isoform0018644	pos:189-1544	--	0.190391	0.180049	0.232086	0.119333	0.0930778	0.134074	0.575053	0.0165818	0.0874445	down	GO:0006364 rRNA processing;GO:0016567 protein ubiquitination	GO:0005730 nucleolus	--	A: RNA processing and modification	K11806	--	IPR019775: WD40 repeat, conserved site;IPR015943: WD40/YVTN repeat-like-containing domain superfamily;IPR001680: WD40 repeat;IPR020472: G-protein beta WD-40 repeat;IPR007287: Sof1-like protein;IPR036322: WD40-repeat-containing domain superfamily	Nucleus	--
Isoform0018659	pos:121-1473	--	26.2684	30.4296	29.7331	19.1817	17.3042	16.525	0.613332	0.00153626	0.024666	down	GO:0000226 microtubule cytoskeleton organization;GO:0000278 mitotic cell cycle;GO:0007017 microtubule-based process	GO:0005737 cytoplasm;GO:0005874 microtubule	GO:0005200 structural constituent of cytoskeleton;GO:0005525 GTP binding	Z: Cytoskeleton	K07374	ko04145: Phagosome;ko04814: Motor proteins	IPR002452: Alpha tubulin;IPR036525: Tubulin/FtsZ, GTPase domain superfamily;IPR018316: Tubulin/FtsZ, 2-layer sandwich domain;IPR017975: Tubulin, conserved site;IPR037103: Tubulin/FtsZ-like, C-terminal domain;IPR000217: Tubulin;IPR023123: Tubulin, C-terminal;IPR003008: Tubulin/FtsZ, GTPase domain;IPR008280: Tubulin/FtsZ, C-terminal	Cytoplasm	--
Isoform0018687	pos:76-1455	--	0.638145	0.762962	0.631978	4.33131	4.18105	4.38927	6.34584	0.000631002	0.0162127	up	GO:0019343 cysteine biosynthetic process via cystathionine;GO:0019346 transsulfuration	GO:0005737 cytoplasm	GO:0004123 cystathionine gamma-lyase activity;GO:0016846 carbon-sulfur lyase activity;GO:0030170 pyridoxal phosphate binding	E: Amino acid transport and metabolism	K01761	ko00270: Cysteine and methionine metabolism;ko00450: Selenocompound metabolism;ko01100: Metabolic pathways	IPR000277: Cys/Met metabolism, pyridoxal phosphate-dependent enzyme;IPR015424: Pyridoxal phosphate-dependent transferase;IPR015422: Pyridoxal phosphate-dependent transferase, small domain;IPR015421: Pyridoxal phosphate-dependent transferase, major domain	Cytoplasm	--
Isoform0018690	pos:66-1151	--	1.03123	1.11309	1.19792	0.529956	0.438527	0.533114	0.449279	0.000936885	0.0196746	down	--	--	--	--	K02116	--	--	chloroplast	--
Isoform0018714	pos:346-1461	--	0.145589	0.181357	0.200754	0.226018	0.335528	0.279931	1.59461	0.0373	0.139372	up	GO:0006468 protein phosphorylation;GO:0009738 abscisic acid-activated signaling pathway;GO:0080163 regulation of protein serine/threonine phosphatase activity	GO:0005634 nucleus;GO:0005737 cytoplasm	GO:0004674 protein serine/threonine kinase activity;GO:0004864 protein phosphatase inhibitor activity;GO:0005524 ATP binding;GO:0010427 abscisic acid binding;GO:0038023 signaling receptor activity	T: Signal transduction mechanisms	K13416	ko04016: MAPK signaling pathway - plant;ko04075: Plant hormone signal transduction;ko04626: Plant-pathogen interaction	IPR008271: Serine/threonine-protein kinase, active site;IPR017441: Protein kinase, ATP binding site;IPR011009: Protein kinase-like domain superfamily;IPR000719: Protein kinase domain;IPR001245: Serine-threonine/tyrosine-protein kinase, catalytic domain	Cytoplasm	--
Isoform0018736	pos:82-1428	--	0.846818	0.940698	0.902768	0.431871	0.497727	0.554133	0.551514	0.00669289	0.053419	down	GO:0010215 cellulose microfibril organization;GO:0052324 plant-type cell wall cellulose biosynthetic process	GO:0046658 anchored component of plasma membrane	--	--	--	--	IPR006918: COBRA, plant	Plasma membrane	CS pos: 23-24. AVA-YD. Pr: 0.9328
Isoform0018741	pos:13-1323	--	2.35376	2.3915	2.21704	1.44911	1.49246	1.46666	0.633156	0.0008828	0.0191082	down	GO:0000162 tryptophan biosynthetic process	--	GO:0004049 anthranilate synthase activity	E: Amino acid transport and metabolism	K01657	ko00400: Phenylalanine, tyrosine and tryptophan biosynthesis;ko01100: Metabolic pathways;ko01110: Biosynthesis of secondary metabolites;ko01230: Biosynthesis of amino acids	IPR019999: Anthranilate synthase component I-like;IPR005801: ADC synthase;IPR015890: Chorismate-utilising enzyme, C-terminal;IPR006805: Anthranilate synthase component I, N-terminal	Cytoplasm	--
Isoform0018761	pos:224-1504	--	0.160265	0.187517	0.135377	0.0966846	0.120267	0.0966893	0.649146	0.0251394	0.112392	down	GO:0006281 DNA repair	--	GO:0051213 dioxygenase activity	A: RNA processing and modification	K10765	--	IPR027450: Alpha-ketoglutarate-dependent dioxygenase AlkB-like;IPR037151: Alpha-ketoglutarate-dependent dioxygenase AlkB-like superfamily;IPR004574: Alkylated DNA repair protein AlkB;IPR005123: Oxoglutarate/iron-dependent dioxygenase	Nucleus	--
Isoform0018767	pos:89-1375	--	0.159838	0.131034	0.174536	0.243131	0.31252	0.212171	1.64978	0.0283822	0.120809	up	GO:0006308 DNA catabolic process	--	GO:0000014 single-stranded DNA endodeoxyribonuclease activity;GO:0003676 nucleic acid binding;GO:0004521 endoribonuclease activity;GO:0046872 metal ion binding	--	K05986	--	IPR008947: Phospholipase C/P1 nuclease domain superfamily;IPR003154: S1/P1 nuclease	chloroplast	CS pos: 23-24. AQA-WG. Pr: 0.2576
Isoform0018784	pos:60-1397	--	11.977	13.3747	12.3024	4.96583	5.10809	5.02036	0.400867	0.000745222	0.0180874	down	--	--	GO:0016747 acyltransferase activity, transferring groups other than amino-acyl groups	--	K19747	--	IPR023213: Chloramphenicol acetyltransferase-like domain superfamily	Cytoplasm	--
Isoform0018786	pos:62-1459	--	0	0	0.01605	0	0	0	0	0	0	down	GO:0006950 response to stress;GO:0051301 cell division	--	GO:0005524 ATP binding;GO:0016887 ATP hydrolysis activity	O: Posttranslational modification, protein turnover, chaperones	K03065	ko03050: Proteasome	IPR025753: AAA-type ATPase, N-terminal domain;IPR027417: P-loop containing nucleoside triphosphate hydrolase;IPR003593: AAA+ ATPase domain;IPR003959: ATPase, AAA-type, core;IPR003960: ATPase, AAA-type, conserved site	chloroplast	--
Isoform0018789	pos:210-1526	--	0.505198	0.472041	0.44953	0.865686	1.0086	0.787874	1.86586	0.00530657	0.0480943	up	--	--	GO:0016747 acyltransferase activity, transferring groups other than amino-acyl groups	--	K13065	ko00940: Phenylpropanoid biosynthesis;ko00941: Flavonoid biosynthesis;ko00945: Stilbenoid, diarylheptanoid and gingerol biosynthesis;ko01100: Metabolic pathways;ko01110: Biosynthesis of secondary metabolites	IPR023213: Chloramphenicol acetyltransferase-like domain superfamily	Cytoplasm	--
Isoform0018830	pos:38-1504	--	0	0.0708744	0.12688	0	0	0	0	0	0	down	GO:1990961 xenobiotic detoxification by transmembrane export across the plasma membrane	GO:0016021 integral component of membrane	GO:0015297 antiporter activity;GO:0042910 xenobiotic transmembrane transporter activity	R: General function prediction only	K03327	--	IPR002528: Multi antimicrobial extrusion protein;IPR045069: Multidrug and toxic compound extrusion family, eukaryotic	Plasma membrane	--
Isoform0018832	pos:363-1148	--	0.179011	0.10846	0.141494	0.332807	0.255219	0.195707	1.82704	0.0467363	0.159524	up	--	--	--	--	--	--	IPR006734: PLATZ transcription factor	Nucleus	--
Isoform0018849	pos:76-1479	--	1.8229	2.18321	2.27383	4.72173	5.08538	5.3311	2.41057	0.00138106	0.0236049	up	GO:0009083 branched-chain amino acid catabolic process	GO:0005947 mitochondrial alpha-ketoglutarate dehydrogenase complex	GO:0016624 oxidoreductase activity, acting on the aldehyde or oxo group of donors, disulfide as acceptor	C: Energy production and conversion	K00166	ko00280: Valine, leucine and isoleucine degradation;ko00640: Propanoate metabolism;ko00785: Lipoic acid metabolism;ko01100: Metabolic pathways;ko01110: Biosynthesis of secondary metabolites	IPR029061: Thiamin diphosphate-binding fold;IPR001017: Dehydrogenase, E1 component	chloroplast	--
Isoform0018892	pos:2-1423	--	8.39114	7.44236	7.26858	31.8089	30.1765	32.7239	4.0996	8.73376e-05	0.00680028	up	GO:0009269 response to desiccation;GO:0009651 response to salt stress;GO:0009737 response to abscisic acid	--	GO:0004029 aldehyde dehydrogenase (NAD+) activity;GO:0043878 glyceraldehyde-3-phosphate dehydrogenase (NAD+) (non-phosphorylating) activity	C: Energy production and conversion	K14085	ko00010: Glycolysis / Gluconeogenesis;ko00053: Ascorbate and aldarate metabolism;ko00071: Fatty acid degradation;ko00260: Glycine, serine and threonine metabolism;ko00280: Valine, leucine and isoleucine degradation;ko00310: Lysine degradation;ko00330: Arginine and proline metabolism;ko00340: Histidine metabolism;ko00380: Tryptophan metabolism;ko00410: beta-Alanine metabolism;ko00561: Glycerolipid…	IPR015590: Aldehyde dehydrogenase domain;IPR016163: Aldehyde dehydrogenase, C-terminal;IPR016162: Aldehyde dehydrogenase, N-terminal;IPR016161: Aldehyde/histidinol dehydrogenase;IPR044638: Aldehyde dehydrogenase family 7 member A1-like;IPR029510: Aldehyde dehydrogenase, glutamic acid active site	Nucleus	--
Isoform0018910	pos:106-1410	--	0	0	0	0.141881	0.0868479	0.140148	inf	0	0	up	--	--	GO:0016747 acyltransferase activity, transferring groups other than amino-acyl groups	--	K13065	ko00940: Phenylpropanoid biosynthesis;ko00941: Flavonoid biosynthesis;ko00945: Stilbenoid, diarylheptanoid and gingerol biosynthesis;ko01100: Metabolic pathways;ko01110: Biosynthesis of secondary metabolites	IPR023213: Chloramphenicol acetyltransferase-like domain superfamily	chloroplast	--
Isoform0018922	pos:27-1385	--	0.32812	0.301472	0.381143	0.848889	0.955983	0.897851	2.67402	0.00111194	0.021292	up	--	--	GO:0016747 acyltransferase activity, transferring groups other than amino-acyl groups	--	K14329	ko00330: Arginine and proline metabolism;ko00999: Biosynthesis of various plant secondary metabolites;ko01100: Metabolic pathways;ko01110: Biosynthesis of secondary metabolites	IPR023213: Chloramphenicol acetyltransferase-like domain superfamily	Extracell	--
Isoform0018924	pos:294-1247	--	0.155282	0.283252	0.167072	0.386456	0.378295	0.504325	2.09555	0.0375407	0.139915	up	--	GO:0005737 cytoplasm	--	--	--	--	IPR019376: Myeloid leukemia factor	Nucleus	--
Isoform0018930	pos:103-1584	--	0.212942	0.238724	0.199542	0.342846	0.395811	0.409965	1.76383	0.00171177	0.0257314	up	--	--	GO:0008194 UDP-glycosyltransferase activity	G: Carbohydrate transport and metabolism;C: Energy production and conversion	K23452	ko00908: Zeatin biosynthesis;ko01110: Biosynthesis of secondary metabolites	IPR002213: UDP-glucuronosyl/UDP-glucosyltransferase;IPR035595: UDP-glycosyltransferase family, conserved site	chloroplast	--
Isoform0018992	pos:9-1199	--	0.746309	0.940792	0.770405	1.38976	1.25151	1.43259	1.65772	0.0075555	0.0570014	up	--	--	--	--	K19366	ko04144: Endocytosis	IPR009686: Senescence/spartin-associated, C-terminal;IPR045036: Spartin-like	chloroplast	--
Isoform0019055	pos:133-1332	--	0.237712	0.166418	0.215208	0.334587	0.460144	0.552791	2.17575	0.0161658	0.086251	up	GO:0010189 vitamin E biosynthetic process	GO:0016021 integral component of membrane	GO:0004659 prenyltransferase activity	--	K09833	ko00130: Ubiquinone and other terpenoid-quinone biosynthesis;ko01100: Metabolic pathways;ko01110: Biosynthesis of secondary metabolites;ko01240: Biosynthesis of cofactors	IPR000537: UbiA prenyltransferase family;IPR044878: UbiA prenyltransferase superfamily;IPR044502: Homogentisate solanesyltransferase AtHST-like	Plasma membrane	--
Isoform0019074	pos:115-1425	--	7.3652	7.58745	6.90996	11.2738	11.3288	12.5739	1.60898	0.000622678	0.0162127	up	GO:0006635 fatty acid beta-oxidation	GO:0005777 peroxisome	GO:0003995 acyl-CoA dehydrogenase activity;GO:0050660 flavin adenine dinucleotide binding	E: Amino acid transport and metabolism	K00232	ko00071: Fatty acid degradation;ko00410: beta-Alanine metabolism;ko00592: alpha-Linolenic acid metabolism;ko00640: Propanoate metabolism;ko01040: Biosynthesis of unsaturated fatty acids;ko01100: Metabolic pathways;ko01110: Biosynthesis of secondary metabolites;ko01200: Carbon metabolism;ko01212: Fatty acid metabolism;ko04146: Peroxisome	IPR036250: Acyl-CoA dehydrogenase-like, C-terminal;IPR006091: Acyl-CoA oxidase/dehydrogenase, middle domain;IPR009075: Acyl-CoA dehydrogenase/oxidase C-terminal;IPR037069: Acyl-CoA dehydrogenase/oxidase, N-terminal domain superfamily;IPR013786: Acyl-CoA dehydrogenase/oxidase, N-terminal;IPR006089: Acyl-CoA dehydrogenase, conserved site;IPR046373: Acyl-CoA oxidase/dehydrogenase, middle domain supe…	chloroplast	--
Isoform0019112	pos:230-1441	--	0.63839	0.73598	0.645149	0.327718	0.379505	0.36134	0.529118	0.0005465	0.0156691	down	--	GO:0000139 Golgi membrane;GO:0005794 Golgi apparatus;GO:0016021 integral component of membrane	GO:0016413 O-acetyltransferase activity	--	K23877	--	IPR025846: Trichome birefringence-like, N-terminal domain;IPR029962: Trichome birefringence-like family;IPR026057: PC-Esterase	vacuolar membrane	--
Isoform0019113	pos:1-1422	--	13.7713	13.971	13.5359	7.50602	7.38141	7.36715	0.539135	3.22274e-06	0.00139592	down	--	--	--	--	K01626	ko00400: Phenylalanine, tyrosine and tryptophan biosynthesis;ko01100: Metabolic pathways;ko01110: Biosynthesis of secondary metabolites;ko01230: Biosynthesis of amino acids	IPR002480: DAHP synthetase, class II;IPR013785: Aldolase-type TIM barrel	Cytoplasm	--
Isoform0019114	pos:2-1411	--	0.821421	0.883573	0.903585	0.606286	0.551443	0.570814	0.662638	0.000504908	0.0155259	down	GO:0071555 cell wall organization	GO:0000139 Golgi membrane;GO:0016021 integral component of membrane	GO:0015018 galactosylgalactosylxylosylprotein 3-beta-glucuronosyltransferase activity	O: Posttranslational modification, protein turnover, chaperones	K20871	--	IPR005027: Glycosyl transferase, family 43;IPR029044: Nucleotide-diphospho-sugar transferases	chloroplast	CS pos: 29-30. LYA-AT. Pr: 0.4870
Isoform0019120	pos:151-1494	--	5.58226	7.62825	7.32275	10.5145	10.7544	9.6396	1.50529	0.0395552	0.144081	up	GO:0006508 proteolysis	--	GO:0004185 serine-type carboxypeptidase activity	O: Posttranslational modification, protein turnover, chaperones;E: Amino acid transport and metabolism	K16297	--	IPR001563: Peptidase S10, serine carboxypeptidase;IPR018202: Serine carboxypeptidase, serine active site;IPR029058: Alpha/Beta hydrolase fold;IPR033124: Serine carboxypeptidases, histidine active site	Cytoskeleton	--
Isoform0019121	pos:320-1435	--	0.306611	0.258712	0.328644	0.177911	0.209251	0.193521	0.649558	0.0106018	0.0693497	down	--	--	--	--	--	--	IPR046533: Protein of unknown function DUF6598	chloroplast	--
Isoform0019132	pos:2-1264	--	0.510704	0.471805	0.463669	0.789804	0.857777	0.787253	1.68363	0.000222891	0.0104441	up	GO:0006541 glutamine metabolic process;GO:0044210 'de novo' CTP biosynthetic process	--	GO:0003883 CTP synthase activity;GO:0005524 ATP binding	F: Nucleotide transport and metabolism	K01937	ko00240: Pyrimidine metabolism;ko01100: Metabolic pathways;ko01232: Nucleotide metabolism;ko01240: Biosynthesis of cofactors	IPR027417: P-loop containing nucleoside triphosphate hydrolase;IPR017456: CTP synthase, N-terminal;IPR017926: Glutamine amidotransferase;IPR033828: CTP synthase GATase domain;IPR004468: CTP synthase;IPR029062: Class I glutamine amidotransferase-like	chloroplast	--
Isoform0019136	pos:350-1390	--	2.93971	2.61118	2.63067	1.77304	1.69776	1.67742	0.629247	0.00236137	0.0305162	down	GO:0006457 protein folding	--	--	--	--	--	IPR040400: BAG family molecular chaperone regulator 5/6/7/8	Nucleus	--
Isoform0019137	pos:257-1423	--	1.49176	1.52045	1.58121	2.3812	2.75445	2.75323	1.71743	0.00400348	0.0415079	up	--	--	GO:0016491 oxidoreductase activity;GO:0046872 metal ion binding	--	--	--	IPR026992: Non-haem dioxygenase N-terminal domain;IPR027443: Isopenicillin N synthase-like superfamily;IPR005123: Oxoglutarate/iron-dependent dioxygenase	Nucleus	--
Isoform0019152	pos:392-1531	--	0.0580216	0.0562306	0.043438	0	0	0	0	0	0	down	--	GO:0005634 nucleus	--	--	--	--	IPR000270: PB1 domain	Nucleus	--
Isoform0019169	pos:31-1143	--	0.121543	0.0662108	0.0685248	0.187316	0.194878	0.14236	2.04681	0.0438744	0.15403	up	GO:0090110 COPII-coated vesicle cargo loading	GO:0030127 COPII vesicle coat;GO:0070971 endoplasmic reticulum exit site	GO:0000149 SNARE binding;GO:0008270 zinc ion binding	R: General function prediction only	--	--	IPR001810: F-box domain;IPR015915: Kelch-type beta propeller;IPR006652: Kelch repeat type 1;IPR036047: F-box-like domain superfamily;IPR044595: F-box/kelch-repeat protein KMD1-4	Cytoplasm	--
Isoform0019211	pos:19-1140	--	0	0	0	0.300175	0.252133	0.0554046	inf	0	0	up	GO:0016567 protein ubiquitination;GO:0044260 cellular macromolecule metabolic process	GO:0005634 nucleus	GO:0061630 ubiquitin protein ligase activity	--	K10640	--	IPR001841: Zinc finger, RING-type;IPR039133: E3 ubiquitin-protein ligase RNF25;IPR016135: Ubiquitin-conjugating enzyme/RWD-like;IPR013083: Zinc finger, RING/FYVE/PHD-type;IPR006575: RWD domain	Nucleus	--
Isoform0019256	pos:100-1434	--	28.6022	28.1163	29.065	17.669	17.3185	18.2506	0.62061	5.06976e-05	0.00549447	down	GO:0000226 microtubule cytoskeleton organization;GO:0000278 mitotic cell cycle;GO:0007017 microtubule-based process	GO:0005737 cytoplasm;GO:0005874 microtubule	GO:0005200 structural constituent of cytoskeleton;GO:0005525 GTP binding	Z: Cytoskeleton	K07375	ko04145: Phagosome;ko04814: Motor proteins	IPR002453: Beta tubulin;IPR023123: Tubulin, C-terminal;IPR003008: Tubulin/FtsZ, GTPase domain;IPR000217: Tubulin;IPR036525: Tubulin/FtsZ, GTPase domain superfamily;IPR013838: Beta tubulin, autoregulation binding site;IPR008280: Tubulin/FtsZ, C-terminal;IPR037103: Tubulin/FtsZ-like, C-terminal domain;IPR018316: Tubulin/FtsZ, 2-layer sandwich domain;IPR017975: Tubulin, conserved site	Nucleus	--
Isoform0019265	pos:85-1542	--	0.233057	0.236012	0.252872	0.450961	0.427532	0.439546	1.82569	0.0001404	0.00792684	up	--	--	GO:0008194 UDP-glycosyltransferase activity	G: Carbohydrate transport and metabolism;C: Energy production and conversion	K22771	ko00944: Flavone and flavonol biosynthesis	IPR035595: UDP-glycosyltransferase family, conserved site;IPR002213: UDP-glucuronosyl/UDP-glucosyltransferase	Extracell	--
Isoform0019288	pos:46-1182	--	0.389988	0.444665	0.407397	0.206689	0.150592	0.233655	0.475775	0.0214151	0.102081	down	GO:0006355 regulation of transcription, DNA-templated	GO:0042644 chloroplast nucleoid	GO:0016531 copper chaperone activity	--	--	--	IPR038961: Protein PEP-related development arrested 1	chloroplast	--
Isoform0019341	pos:408-1106	--	0	0	0	0.0271544	0	0	inf	0	0	up	--	--	--	--	--	--	IPR041118: Rx, N-terminal	Mitochondrion	--
Isoform0019386	pos:2-1381	--	0.476599	0.400945	0.575539	0.918171	1.01828	0.991638	2.01508	0.0148426	0.0827821	up	--	GO:0005886 plasma membrane	--	--	K19366	ko04144: Endocytosis	IPR009686: Senescence/spartin-associated, C-terminal;IPR045036: Spartin-like	Cytoplasm	--
Isoform0019396	pos:992-1381	--	0.156305	0.128162	0.106105	0.0648352	0.0659653	0.0883401	0.561076	0.018993	0.0952831	down	--	--	GO:0046982 protein heterodimerization activity	K: Transcription	--	--	IPR009072: Histone-fold;IPR003958: Transcription factor CBF/NF-Y/archaeal histone domain	Nucleus	--
Isoform0019413	pos:264-1376	--	0.126442	0.0999802	0.126958	0.0642923	0.063899	0.0813701	0.59302	0.00955278	0.0653421	down	GO:0006470 protein dephosphorylation	--	GO:0017018 myosin phosphatase activity;GO:0046872 metal ion binding	T: Signal transduction mechanisms	K14803	--	IPR001932: PPM-type phosphatase-like domain;IPR036457: PPM-type phosphatase-like domain superfamily;IPR015655: Protein phosphatase 2C family;IPR000222: PPM-type phosphatase, divalent cation binding	Cytoskeleton	--
Isoform0019424	pos:35-1336	--	0.0804412	0.11874	0.176358	0.0439365	0.0653046	0.0487438	0.420688	0.0472958	0.160916	down	--	--	--	G: Carbohydrate transport and metabolism	--	--	IPR029033: Histidine phosphatase superfamily;IPR013078: Histidine phosphatase superfamily, clade-1	Mitochondrion	--
Isoform0019487	pos:117-1565	--	0.668404	0.724568	0.784691	3.43263	3.49359	3.56528	4.81778	0.000486866	0.0153129	up	--	--	GO:0080043 quercetin 3-O-glucosyltransferase activity;GO:0080044 quercetin 7-O-glucosyltransferase activity	G: Carbohydrate transport and metabolism;C: Energy production and conversion	K23452	ko00908: Zeatin biosynthesis;ko01110: Biosynthesis of secondary metabolites	IPR002213: UDP-glucuronosyl/UDP-glucosyltransferase;IPR035595: UDP-glycosyltransferase family, conserved site	chloroplast	--
Isoform0019535	pos:141-1316	--	1.29634	1.62242	1.69849	0.891644	0.918359	0.740394	0.552362	0.00600491	0.0506265	down	GO:0006631 fatty acid metabolic process;GO:0006633 fatty acid biosynthetic process	GO:0009507 chloroplast	GO:0045300 acyl-[acyl-carrier-protein] desaturase activity;GO:0046872 metal ion binding	--	K03921	ko00061: Fatty acid biosynthesis;ko01040: Biosynthesis of unsaturated fatty acids;ko01100: Metabolic pathways;ko01212: Fatty acid metabolism	IPR005067: Fatty acid desaturase, type 2;IPR012348: Ribonucleotide reductase-like;IPR009078: Ferritin-like superfamily;IPR005803: Fatty acid desaturase type 2, conserved site	chloroplast	--
Isoform0019582	pos:71-1354	--	20.8388	22.6354	22.9425	12.4175	12.5511	12.9428	0.570811	0.00083263	0.0188419	down	GO:0006782 protoporphyrinogen IX biosynthetic process;GO:0015995 chlorophyll biosynthetic process	--	GO:0004655 porphobilinogen synthase activity;GO:0046872 metal ion binding	H: Coenzyme transport and metabolism	K01698	ko00860: Porphyrin metabolism;ko01100: Metabolic pathways;ko01110: Biosynthesis of secondary metabolites;ko01240: Biosynthesis of cofactors	IPR001731: Delta-aminolevulinic acid dehydratase;IPR030656: Delta-aminolevulinic acid dehydratase, active site;IPR013785: Aldolase-type TIM barrel	chloroplast	--
Isoform0019584	pos:102-1523	--	0.0836027	0.109054	0.0811463	0.159547	0.157323	0.110998	1.56268	0.0460352	0.158407	up	GO:0006508 proteolysis;GO:0019748 secondary metabolic process	--	GO:0004185 serine-type carboxypeptidase activity;GO:0016747 acyltransferase activity, transferring groups other than amino-acyl groups	O: Posttranslational modification, protein turnover, chaperones;E: Amino acid transport and metabolism	K16296	--	IPR001563: Peptidase S10, serine carboxypeptidase;IPR033124: Serine carboxypeptidases, histidine active site;IPR029058: Alpha/Beta hydrolase fold	chloroplast	CS pos: 33-34. ASA-SA. Pr: 0.5091
Isoform0019600	pos:1-1422	--	0.900129	0.8662	0.771562	1.43563	1.53335	1.18787	1.63792	0.00935049	0.0642776	up	GO:0005975 carbohydrate metabolic process	GO:0009507 chloroplast	GO:0008422 beta-glucosidase activity;GO:0102726 DIMBOA glucoside beta-D-glucosidase activity	G: Carbohydrate transport and metabolism	K01188	ko00460: Cyanoamino acid metabolism;ko00500: Starch and sucrose metabolism;ko00999: Biosynthesis of various plant secondary metabolites;ko01100: Metabolic pathways;ko01110: Biosynthesis of secondary metabolites	IPR017853: Glycoside hydrolase superfamily;IPR001360: Glycoside hydrolase family 1	Cytoplasm	--
Isoform0019605	pos:199-1347	--	3.09798	3.47555	3.04987	1.27279	1.15833	1.2105	0.378413	0.000111321	0.00721083	down	--	GO:0005829 cytosol	GO:0003729 mRNA binding	R: General function prediction only	K13201	--	IPR012677: Nucleotide-binding alpha-beta plait domain superfamily;IPR000504: RNA recognition motif domain;IPR035979: RNA-binding domain superfamily	chloroplast	--
Isoform0019654	pos:142-1293	--	0	0.0457132	0.0379786	0	0	0	0	0	0	down	GO:0006629 lipid metabolic process	GO:0016021 integral component of membrane	GO:0016717 oxidoreductase activity, acting on paired donors, with oxidation of a pair of donors resulting in the reduction of molecular oxygen to two molecules of water	--	K10257	--	IPR005804: Fatty acid desaturase domain;IPR021863: Fatty acid desaturase, N-terminal	Cytoplasm	--
Isoform0019679	pos:19-1434	--	0.0538349	0.0663334	0	0.102612	0.0972495	0.148232	1.93115	0.0320504	0.127973	up	--	--	--	--	K15400	ko00073: Cutin, suberine and wax biosynthesis	IPR023213: Chloramphenicol acetyltransferase-like domain superfamily	chloroplast	--
Isoform0019680	pos:113-1315	--	0.0963743	0.148037	0.21541	1.16498	1.28247	1.42148	8.414	0.00814395	0.0593811	up	--	--	GO:0017018 myosin phosphatase activity;GO:0046872 metal ion binding	T: Signal transduction mechanisms	K14497	ko04016: MAPK signaling pathway - plant;ko04075: Plant hormone signal transduction	IPR001932: PPM-type phosphatase-like domain;IPR000222: PPM-type phosphatase, divalent cation binding;IPR036457: PPM-type phosphatase-like domain superfamily	Nucleus	--
Isoform0019709	pos:140-1372	--	0.456655	0.404553	0.435686	2.41005	2.32863	2.4231	5.52225	0.000104389	0.00721083	up	--	GO:0016021 integral component of membrane	--	--	--	--	IPR045883: Transmembrane protein At4g13530-like	Extracell	--
Isoform0019745	pos:118-1410	--	0.257083	0.255851	0.293196	0.177616	0.166761	0.168771	0.636557	0.00389722	0.0409836	down	GO:0006468 protein phosphorylation	--	GO:0004674 protein serine/threonine kinase activity;GO:0005524 ATP binding	T: Signal transduction mechanisms	K00924	--	IPR000719: Protein kinase domain;IPR011009: Protein kinase-like domain superfamily;IPR001245: Serine-threonine/tyrosine-protein kinase, catalytic domain;IPR017441: Protein kinase, ATP binding site;IPR008271: Serine/threonine-protein kinase, active site	Mitochondrion	--
Isoform0019832	pos:293-1408	--	0.112307	0.0691267	0.0792908	0.0413068	0.0567879	0.0499536	0.567835	0.0405004	0.145879	down	GO:0006487 protein N-linked glycosylation;GO:0009312 oligosaccharide biosynthetic process	GO:0000139 Golgi membrane;GO:0005795 Golgi stack;GO:0016021 integral component of membrane	GO:0008455 alpha-1,6-mannosylglycoprotein 2-beta-N-acetylglucosaminyltransferase activity;GO:0046872 metal ion binding	G: Carbohydrate transport and metabolism	K00736	ko00510: N-Glycan biosynthesis;ko00513: Various types of N-glycan biosynthesis;ko01100: Metabolic pathways	IPR029044: Nucleotide-diphospho-sugar transferases;IPR007754: N-acetylglucosaminyltransferase II	chloroplast	--
Isoform0019833	pos:160-1335	--	0.188006	0.298187	0.268318	0.132006	0.110523	0.164791	0.539847	0.0294496	0.123005	down	--	--	GO:0005516 calmodulin binding	--	--	--	IPR012417: Calmodulin-binding domain, plant	Nucleus	--
Isoform0019875	pos:32-1402	--	0.884132	0.837818	0.863037	0.602082	0.548833	0.529566	0.650092	0.00317669	0.0367387	down	--	--	--	S: Function unknown	K24166	--	IPR011989: Armadillo-like helical;IPR016024: Armadillo-type fold;IPR000225: Armadillo	Cytoplasm	--
Isoform0019943	pos:138-1379	--	0.080695	0	0	0	0	0	0	0	0	down	--	--	GO:0005096 GTPase activator activity	T: Signal transduction mechanisms	K12493	ko04144: Endocytosis	IPR038508: ArfGAP domain superfamily;IPR037278: ARFGAP/RecO-like zinc finger;IPR001164: Arf GTPase activating protein	Nucleus	--
Isoform0019970	pos:72-1376	--	0.380612	0.443371	0.332607	1.04018	0.970329	1.23526	2.80633	0.000782233	0.0184532	up	--	--	--	C: Energy production and conversion	--	--	IPR046342: CBS domain superfamily;IPR000644: CBS domain	Cytoplasm	--
Isoform0020016	pos:113-1312	--	0.79234	0.829704	0.860591	4.58176	4.25519	4.04924	5.19053	1.08185e-05	0.0024038	up	--	--	--	--	--	--	IPR004182: GRAM domain;IPR011993: PH-like domain superfamily;IPR037848: GEM-like protein	Nucleus	--
Isoform0020024	pos:71-1186	--	0.386915	0.506957	0.529679	0.33684	0.219184	0.20311	0.533268	0.0337382	0.131293	down	GO:0006412 translation;GO:0032543 mitochondrial translation	GO:0005739 mitochondrion	GO:0003924 GTPase activity;GO:0005525 GTP binding	R: General function prediction only	K19828	--	IPR023179: GTP-binding protein, orthogonal bundle domain superfamily;IPR006073: GTP binding domain;IPR027417: P-loop containing nucleoside triphosphate hydrolase;IPR019991: GTP-binding protein, ribosome biogenesis	chloroplast	--
Isoform0020079	pos:376-1317	--	0.234989	0.203787	0.20342	0.661669	0.722554	0.771577	3.35692	5.16104e-05	0.00549447	up	GO:0007165 signal transduction	GO:0005634 nucleus	--	--	--	--	IPR031307: Ninja family;IPR032308: Tify domain binding domain;IPR032310: Putative nuclear localisation signal;IPR012463: Ethylene-responsive binding factor-associated repression	Nucleus	--
Isoform0020083	pos:150-1364	--	1.6399	2.44296	1.68239	3.03203	2.92091	3.4498	1.63094	0.0451136	0.156723	up	GO:0006629 lipid metabolic process	--	GO:0008081 phosphoric diester hydrolase activity	--	--	--	IPR017946: PLC-like phosphodiesterase, TIM beta/alpha-barrel domain superfamily	vacuolar membrane	CS pos: 24-25. VSA-RK. Pr: 0.5861
Isoform0020091	pos:115-1410	--	0	0	0	0	0.0789056	0	inf	0	0	up	GO:0016042 lipid catabolic process	--	GO:0004620 phospholipase activity;GO:0047372 acylglycerol lipase activity	I: Lipid transport and metabolism	--	--	IPR002641: Patatin-like phospholipase domain;IPR016035: Acyl transferase/acyl hydrolase/lysophospholipase	chloroplast	--
Isoform0020092	pos:78-1433	--	0.447778	0.444699	0.553485	0.899223	0.805597	0.774684	1.71478	0.00547861	0.0481377	up	GO:0071704 organic substance metabolic process	--	GO:0008270 zinc ion binding;GO:0016491 oxidoreductase activity	Q: Secondary metabolites biosynthesis, transport and catabolism	K00001	ko00010: Glycolysis / Gluconeogenesis;ko00071: Fatty acid degradation;ko00350: Tyrosine metabolism;ko00620: Pyruvate metabolism;ko01100: Metabolic pathways;ko01110: Biosynthesis of secondary metabolites	IPR020843: Polyketide synthase, enoylreductase domain;IPR036291: NAD(P)-binding domain superfamily;IPR011032: GroES-like superfamily;IPR013154: Alcohol dehydrogenase, N-terminal;IPR002328: Alcohol dehydrogenase, zinc-type, conserved site;IPR013149: Alcohol dehydrogenase-like, C-terminal	Cytoplasm	--
Isoform0020114	pos:94-1407	--	0.120873	0.125897	0.112176	0.625803	0.614725	0.659042	5.29208	1.17489e-05	0.00246706	up	GO:0006520 cellular amino acid metabolic process;GO:0009058 biosynthetic process	--	GO:0008483 transaminase activity;GO:0030170 pyridoxal phosphate binding	E: Amino acid transport and metabolism	K00815	ko00130: Ubiquinone and other terpenoid-quinone biosynthesis;ko00270: Cysteine and methionine metabolism;ko00350: Tyrosine metabolism;ko00360: Phenylalanine metabolism;ko00400: Phenylalanine, tyrosine and tryptophan biosynthesis;ko00950: Isoquinoline alkaloid biosynthesis;ko00960: Tropane, piperidine and pyridine alkaloid biosynthesis;ko01100: Metabolic pathways;ko01110: Biosynthesis of secondary…	IPR005958: Tyrosine/nicotianamine aminotransferase;IPR004839: Aminotransferase, class I/classII;IPR015424: Pyridoxal phosphate-dependent transferase;IPR015422: Pyridoxal phosphate-dependent transferase, small domain;IPR015421: Pyridoxal phosphate-dependent transferase, major domain	chloroplast	--
Isoform0020115	pos:119-1429	--	2.2974	2.53222	1.99352	3.20092	3.4803	4.30196	1.60969	0.0150596	0.0834519	up	GO:0006635 fatty acid beta-oxidation	GO:0005777 peroxisome	GO:0003995 acyl-CoA dehydrogenase activity;GO:0050660 flavin adenine dinucleotide binding	E: Amino acid transport and metabolism	K00232	ko00071: Fatty acid degradation;ko00410: beta-Alanine metabolism;ko00592: alpha-Linolenic acid metabolism;ko00640: Propanoate metabolism;ko01040: Biosynthesis of unsaturated fatty acids;ko01100: Metabolic pathways;ko01110: Biosynthesis of secondary metabolites;ko01200: Carbon metabolism;ko01212: Fatty acid metabolism;ko04146: Peroxisome	IPR013786: Acyl-CoA dehydrogenase/oxidase, N-terminal;IPR036250: Acyl-CoA dehydrogenase-like, C-terminal;IPR006091: Acyl-CoA oxidase/dehydrogenase, middle domain;IPR037069: Acyl-CoA dehydrogenase/oxidase, N-terminal domain superfamily;IPR009100: Acyl-CoA dehydrogenase/oxidase, N-terminal and middle domain superfamily;IPR006089: Acyl-CoA dehydrogenase, conserved site;IPR046373: Acyl-CoA oxidase/de…	chloroplast	--
Isoform0020117	pos:23-1105	--	0	0	0	0	0.181309	0.211697	inf	0	0	up	GO:0006508 proteolysis	--	GO:0004185 serine-type carboxypeptidase activity	O: Posttranslational modification, protein turnover, chaperones;E: Amino acid transport and metabolism	K09756	ko00940: Phenylpropanoid biosynthesis;ko01110: Biosynthesis of secondary metabolites	IPR001563: Peptidase S10, serine carboxypeptidase;IPR029058: Alpha/Beta hydrolase fold	chloroplast	CS pos: 35-36. AEA-AP. Pr: 0.2605
Isoform0020123	pos:1-1446	--	1.56792	1.55114	1.37747	2.63349	3.04447	2.56566	1.83333	0.00111419	0.021292	up	--	--	GO:0003993 acid phosphatase activity;GO:0046872 metal ion binding	G: Carbohydrate transport and metabolism	K22390	--	IPR004843: Calcineurin-like phosphoesterase domain, ApaH type;IPR025733: Iron/zinc purple acid phosphatase-like C-terminal domain;IPR041792: Purple acid phosphatase, metallophosphatase domain;IPR008963: Purple acid phosphatase-like, N-terminal;IPR015914: Purple acid phosphatase, N-terminal;IPR029052: Metallo-dependent phosphatase-like;IPR039331: Purple acid phosphatase-like	chloroplast	--
Isoform0020174	pos:21-1208	--	0.945567	0.935684	0.916251	0.607921	0.539754	0.586639	0.619951	0.00340785	0.0384177	down	GO:0006526 arginine biosynthetic process	GO:0005737 cytoplasm	GO:0004042 acetyl-CoA:L-glutamate N-acetyltransferase activity;GO:0103045 methione N-acyltransferase activity	E: Amino acid transport and metabolism	K14682	ko00220: Arginine biosynthesis;ko01100: Metabolic pathways;ko01110: Biosynthesis of secondary metabolites;ko01210: 2-Oxocarboxylic acid metabolism;ko01230: Biosynthesis of amino acids	IPR010167: Amino-acid N-acetyltransferase;IPR016181: Acyl-CoA N-acyltransferase;IPR000182: GNAT domain;IPR036393: Acetylglutamate kinase-like superfamily;IPR001048: Aspartate/glutamate/uridylate kinase	Cytoplasm	--
Isoform0020175	pos:68-1426	--	0.47556	0.561981	0.585721	1.17483	1.19093	1.38486	2.31054	0.000631637	0.0162127	up	--	--	GO:0016747 acyltransferase activity, transferring groups other than amino-acyl groups	--	K14329	ko00330: Arginine and proline metabolism;ko00999: Biosynthesis of various plant secondary metabolites;ko01100: Metabolic pathways;ko01110: Biosynthesis of secondary metabolites	IPR023213: Chloramphenicol acetyltransferase-like domain superfamily	Extracell	--
Isoform0020286	pos:3-1217	--	0.599998	0.53269	0.536696	0.281265	0.277807	0.294951	0.51158	0.000732406	0.0180172	down	--	--	GO:0005524 ATP binding;GO:0016887 ATP hydrolysis activity	O: Posttranslational modification, protein turnover, chaperones	K07767	--	IPR003959: ATPase, AAA-type, core;IPR027417: P-loop containing nucleoside triphosphate hydrolase;IPR003593: AAA+ ATPase domain;IPR041569: AAA ATPase, AAA+ lid domain	chloroplast	--
Isoform0020287	pos:258-1301	--	25.1697	27.4881	27.5308	17.9627	17.1337	17.8338	0.660071	0.0012312	0.0224352	down	GO:0033320 UDP-D-xylose biosynthetic process;GO:0042732 D-xylose metabolic process	GO:0005737 cytoplasm	GO:0048040 UDP-glucuronate decarboxylase activity;GO:0070403 NAD+ binding	G: Carbohydrate transport and metabolism;M: Cell wall/membrane/envelope biogenesis	K08678	ko00520: Amino sugar and nucleotide sugar metabolism;ko01100: Metabolic pathways;ko01250: Biosynthesis of nucleotide sugars	IPR036291: NAD(P)-binding domain superfamily;IPR016040: NAD(P)-binding domain;IPR044516: UDP-glucuronic acid decarboxylase	chloroplast	--
Isoform0020305	pos:37-1257	--	0.340989	0.420702	0.415062	0.112244	0.1586	0.126958	0.338051	0.0015653	0.0249579	down	GO:0030488 tRNA methylation;GO:0070475 rRNA base methylation	GO:0005737 cytoplasm	GO:0008173 RNA methyltransferase activity;GO:0046872 metal ion binding;GO:0051539 4 iron, 4 sulfur cluster binding	--	K06941	--	IPR006638: Elp3/MiaA/NifB-like, radical SAM core domain;IPR013785: Aldolase-type TIM barrel;IPR007197: Radical SAM;IPR004383: Ribosomal RNA large subunit methyltransferase RlmN/Cfr;IPR027492: Dual-specificity RNA methyltransferase RlmN;IPR040072: Methyltransferase (Class A)	Mitochondrion	--
Isoform0020319	pos:137-1360	--	0.79203	0.660695	0.729484	0.504885	0.418192	0.466952	0.636983	0.00400243	0.0415079	down	GO:0016042 lipid catabolic process	--	GO:0016298 lipase activity	I: Lipid transport and metabolism	--	--	IPR002641: Patatin-like phospholipase domain;IPR016035: Acyl transferase/acyl hydrolase/lysophospholipase	chloroplast	--
Isoform0020323	pos:78-1382	--	6.3819	6.27465	6.2845	14.1604	12.6571	13.0723	2.106	0.00159567	0.0251288	up	--	--	--	R: General function prediction only	K08232	ko00053: Ascorbate and aldarate metabolism;ko01100: Metabolic pathways	IPR023753: FAD/NAD(P)-binding domain;IPR016156: FAD/NAD-linked reductase, dimerisation domain superfamily;IPR036188: FAD/NAD(P)-binding domain superfamily	Cytoplasm	--
Isoform0020339	pos:139-1326	--	2.84615	3.08189	2.9526	4.87032	4.86858	5.11384	1.67249	0.000110127	0.00721083	up	--	--	GO:0005509 calcium ion binding	--	--	--	IPR002048: EF-hand domain;IPR018247: EF-Hand 1, calcium-binding site;IPR011992: EF-hand domain pair	Nucleus	--
Isoform0020340	pos:201-1238	--	17.7583	19.0167	18.6401	32.9371	33.8572	33.4236	1.80849	0.000291191	0.0117294	up	--	--	GO:0016788 hydrolase activity, acting on ester bonds	--	K01206	ko00511: Other glycan degradation	IPR035669: GDSL lipase/esterase-like, plant;IPR001087: GDSL lipase/esterase;IPR036514: SGNH hydrolase superfamily	Nucleus	--
Isoform0020360	pos:51-1412	--	2.75284	2.49993	2.20053	3.8963	4.0244	3.83518	1.57727	0.0158266	0.0855009	up	GO:0051603 proteolysis involved in cellular protein catabolic process	GO:0005615 extracellular space;GO:0005764 lysosome	GO:0004197 cysteine-type endopeptidase activity	O: Posttranslational modification, protein turnover, chaperones	K25900	--	IPR000118: Granulin;IPR025660: Cysteine peptidase, histidine active site;IPR039417: Papain-like cysteine endopeptidase;IPR013201: Cathepsin propeptide inhibitor domain (I29);IPR000668: Peptidase C1A, papain C-terminal;IPR038765: Papain-like cysteine peptidase superfamily;IPR000169: Cysteine peptidase, cysteine active site;IPR037277: Granulin superfamily;IPR025661: Cysteine peptidase, asparagine a…	Extracell	CS pos: 24-25. VAA-AG. Pr: 0.5018
Isoform0020400	pos:89-1342	--	1.64717	1.48543	1.43169	0.633102	0.653709	0.551685	0.4028	0.000220524	0.0104039	down	--	--	GO:0003743 translation initiation factor activity	--	--	--	IPR010433: Plant specific eukaryotic initiation factor 4B	Nucleus	--
Isoform0020401	pos:300-1406	--	1.18589	1.01412	1.19879	2.47372	2.31031	2.67214	2.19377	0.000451401	0.0149483	up	--	--	GO:0003824 catalytic activity	C: Energy production and conversion	K00167	ko00280: Valine, leucine and isoleucine degradation;ko00640: Propanoate metabolism;ko00785: Lipoic acid metabolism;ko01100: Metabolic pathways;ko01110: Biosynthesis of secondary metabolites	IPR029061: Thiamin diphosphate-binding fold;IPR009014: Transketolase C-terminal/Pyruvate-ferredoxin oxidoreductase domain II;IPR033248: Transketolase, C-terminal domain;IPR005475: Transketolase-like, pyrimidine-binding domain	Mitochondrion	--
Isoform0020406	pos:3-1280	--	0.898917	2.40141	1.2901	6.47441	5.91166	5.8874	3.98078	0.0350004	0.134608	up	GO:0016310 phosphorylation;GO:0055129 L-proline biosynthetic process	--	GO:0004349 glutamate 5-kinase activity;GO:0004350 glutamate-5-semialdehyde dehydrogenase activity;GO:0005524 ATP binding	E: Amino acid transport and metabolism	K12657	ko00330: Arginine and proline metabolism;ko01100: Metabolic pathways;ko01110: Biosynthesis of secondary metabolites;ko01230: Biosynthesis of amino acids	IPR012134: Glutamate-5-semialdehyde dehydrogenase;IPR000965: GPR domain;IPR016162: Aldehyde dehydrogenase, N-terminal;IPR016163: Aldehyde dehydrogenase, C-terminal;IPR020593: Gamma-glutamyl phosphate reductase GPR, conserved site;IPR016161: Aldehyde/histidinol dehydrogenase;IPR015590: Aldehyde dehydrogenase domain	Cytoplasm	--
Isoform0020434	pos:203-940	--	0.868784	0.826415	0.786391	0.378749	0.435767	0.401261	0.489919	0.000264001	0.0111817	down	--	--	GO:0051087 chaperone binding	T: Signal transduction mechanisms	--	--	IPR000626: Ubiquitin-like domain;IPR003103: BAG domain;IPR039773: Molecular chaperone regulator BAG;IPR036533: BAG domain superfamily;IPR029071: Ubiquitin-like domain superfamily	Cytoplasm	--
Isoform0020481	pos:398-1420	--	0.272331	0	0	0	0	0	0	0	0	down	--	--	GO:0003746 translation elongation factor activity;GO:0003924 GTPase activity;GO:0005525 GTP binding	J: Translation, ribosomal structure and biogenesis	K03231	ko03013: Nucleocytoplasmic transport	IPR027417: P-loop containing nucleoside triphosphate hydrolase;IPR009000: Translation protein, beta-barrel domain superfamily;IPR009001: Translation elongation factor EF1A/initiation factor IF2gamma, C-terminal;IPR000795: Translational (tr)-type GTP-binding domain;IPR004160: Translation elongation factor EFTu/EF1A, C-terminal;IPR004161: Translation elongation factor EFTu-like, domain 2	Cytoplasm	--
Isoform0020488	pos:110-1174	--	2.13116	1.8867	1.86378	2.9925	3.45303	3.24262	1.64719	0.00111352	0.021292	up	GO:0008299 isoprenoid biosynthetic process	GO:0005737 cytoplasm	GO:0004496 mevalonate kinase activity;GO:0005524 ATP binding	--	K16190	ko00040: Pentose and glucuronate interconversions;ko00053: Ascorbate and aldarate metabolism;ko00520: Amino sugar and nucleotide sugar metabolism;ko01100: Metabolic pathways;ko01250: Biosynthesis of nucleotide sugars	IPR036554: GHMP kinase, C-terminal domain superfamily;IPR006204: GHMP kinase N-terminal domain;IPR020568: Ribosomal protein S5 domain 2-type fold;IPR013750: GHMP kinase, C-terminal domain	Endoplasmic reticulum	--
Isoform0020510	pos:48-1310	--	9.01022	6.57632	8.2869	5.03656	5.50875	4.64613	0.636332	0.0244367	0.110956	down	--	--	--	--	--	--	IPR032675: Leucine-rich repeat domain superfamily	Extracell	CS pos: 21-22. VDA-IT. Pr: 0.6497
Isoform0020578	pos:150-1211	--	0.206318	0.209297	0.188035	0.140217	0.110127	0.0937411	0.570007	0.0310745	0.125981	down	GO:0005975 carbohydrate metabolic process;GO:0009834 plant-type secondary cell wall biogenesis;GO:0010417 glucuronoxylan biosynthetic process;GO:0071555 cell wall organization	GO:0000139 Golgi membrane	GO:0015018 galactosylgalactosylxylosylprotein 3-beta-glucuronosyltransferase activity;GO:0042285 xylosyltransferase activity	O: Posttranslational modification, protein turnover, chaperones	K20869	--	IPR005027: Glycosyl transferase, family 43;IPR029044: Nucleotide-diphospho-sugar transferases	chloroplast	--
Isoform0020611	pos:80-1414	--	0.292442	0.215102	0.375896	0.121872	0.160659	0.151959	0.491816	0.0318278	0.127536	down	--	--	GO:0003723 RNA binding	--	--	--	IPR023342: APO domain	chloroplast	--
Isoform0020632	pos:89-1273	--	21.1559	25.0989	24.9165	15.1172	14.9437	14.7414	0.629498	0.0132588	0.0779982	down	GO:0015979 photosynthesis;GO:0015995 chlorophyll biosynthetic process	GO:0009507 chloroplast	GO:0016630 protochlorophyllide reductase activity	Q: Secondary metabolites biosynthesis, transport and catabolism	K00218	ko00860: Porphyrin metabolism;ko01100: Metabolic pathways;ko01110: Biosynthesis of secondary metabolites	IPR005979: Light-dependent protochlorophyllide reductase;IPR002347: Short-chain dehydrogenase/reductase SDR;IPR036291: NAD(P)-binding domain superfamily	chloroplast	--
Isoform0020639	pos:268-1242	--	0.128635	0.149958	0.108669	0.0920808	0.0828579	0.0602248	0.607246	0.0372321	0.139302	down	--	GO:0005634 nucleus	--	--	--	--	IPR000270: PB1 domain	chloroplast	--
Isoform0020686	pos:104-1264	--	0.0396163	0	0.0516276	0	0	0	0	0	0	down	GO:0009826 unidimensional cell growth;GO:0009834 plant-type secondary cell wall biogenesis;GO:0010315 auxin export across the plasma membrane;GO:0090355 positive regulation of auxin metabolic process;GO:0090358 positive regulation of tryptophan metabolic process	GO:0009705 plant-type vacuole membrane;GO:0016021 integral component of membrane	GO:0022857 transmembrane transporter activity	--	--	--	IPR000620: EamA domain;IPR030184: WAT1-related protein	Cytoplasm	--
Isoform0020718	pos:210-1325	--	4.2009	4.49979	4.49	14.9791	13.587	14.1672	3.23965	8.39091e-06	0.00214061	up	GO:0006545 glycine biosynthetic process;GO:0006567 threonine catabolic process	GO:0005829 cytosol	GO:0008732 L-allo-threonine aldolase activity	E: Amino acid transport and metabolism	K01620	ko00260: Glycine, serine and threonine metabolism;ko01100: Metabolic pathways;ko01110: Biosynthesis of secondary metabolites;ko01230: Biosynthesis of amino acids	IPR015422: Pyridoxal phosphate-dependent transferase, small domain;IPR015424: Pyridoxal phosphate-dependent transferase;IPR023603: Low specificity L-threonine aldolase;IPR001597: Aromatic amino acid beta-eliminating lyase/threonine aldolase;IPR015421: Pyridoxal phosphate-dependent transferase, major domain	Cytoplasm	--
Isoform0020748	pos:301-1317	--	0.212282	0.161736	0.214639	0.0544709	0.0470179	0.0946134	0.333135	0.0201599	0.0988337	down	GO:0009263 deoxyribonucleotide biosynthetic process	GO:0009536 plastid	GO:0016491 oxidoreductase activity	F: Nucleotide transport and metabolism	K10808	ko00230: Purine metabolism;ko00240: Pyrimidine metabolism;ko00480: Glutathione metabolism;ko01100: Metabolic pathways;ko01232: Nucleotide metabolism	IPR009078: Ferritin-like superfamily;IPR030475: Ribonucleotide reductase small subunit, acitve site;IPR012348: Ribonucleotide reductase-like;IPR033909: Ribonucleotide reductase small subunit;IPR000358: Ribonucleotide reductase small subunit family	chloroplast	--
Isoform0020756	pos:220-1239	--	0.246805	0.361674	0.257095	0.167127	0.155296	0.145639	0.540754	0.0286087	0.121298	down	--	--	--	R: General function prediction only	--	--	IPR029063: S-adenosyl-L-methionine-dependent methyltransferase superfamily	chloroplast	--
Isoform0020766	pos:217-1443	--	0	0	0	0.0513959	0	0.076511	inf	0	0	up	GO:0033387 putrescine biosynthetic process from ornithine	GO:0005737 cytoplasm	GO:0004586 ornithine decarboxylase activity	E: Amino acid transport and metabolism	K01586	ko00300: Lysine biosynthesis;ko00470: D-Amino acid metabolism;ko01100: Metabolic pathways;ko01110: Biosynthesis of secondary metabolites;ko01230: Biosynthesis of amino acids	IPR002433: Ornithine decarboxylase;IPR022653: Orn/DAP/Arg decarboxylase 2, pyridoxal-phosphate binding site;IPR009006: Alanine racemase/group IV decarboxylase, C-terminal;IPR029066: PLP-binding barrel;IPR022644: Orn/DAP/Arg decarboxylase 2, N-terminal;IPR000183: Ornithine/DAP/Arg decarboxylase;IPR022643: Orn/DAP/Arg decarboxylase 2, C-terminal	Extracell	--
Isoform0020775	pos:77-1177	--	0.29648	0.350257	0.418449	0.219094	0.225027	0.210454	0.614517	0.0365764	0.137854	down	--	GO:0009536 plastid	--	--	--	--	IPR009078: Ferritin-like superfamily;IPR007402: Protein of unknown function DUF455	chloroplast	--
Isoform0020780	pos:269-1243	--	0.976743	0.9612	0.962498	0.584605	0.644801	0.704065	0.666613	0.0161594	0.086251	down	GO:0009089 lysine biosynthetic process via diaminopimelate;GO:0019877 diaminopimelate biosynthetic process	--	GO:0008839 4-hydroxy-tetrahydrodipicolinate reductase;GO:0070402 NADPH binding	--	K00215	ko00261: Monobactam biosynthesis;ko00300: Lysine biosynthesis;ko01100: Metabolic pathways;ko01110: Biosynthesis of secondary metabolites;ko01230: Biosynthesis of amino acids	IPR036291: NAD(P)-binding domain superfamily;IPR000846: Dihydrodipicolinate reductase, N-terminal;IPR011859: Dihydrodipicolinate reductase, plant-type;IPR022663: Dihydrodipicolinate reductase, C-terminal;IPR023940: Dihydrodipicolinate reductase	chloroplast	--
Isoform0020794	pos:31-1143	--	0.120492	0.149713	0.100984	0.23779	0.279823	0.270583	2.12343	0.0112985	0.0724617	up	--	--	--	--	--	--	IPR036047: F-box-like domain superfamily	Cytoplasm	--
Isoform0020801	pos:105-1142	--	0.32854	0.339806	0.340076	0.190391	0.218509	0.189864	0.593764	0.00544985	0.0481377	down	--	GO:0016021 integral component of membrane	--	S: Function unknown	--	--	IPR003848: Domain of unknown function DUF218	Nucleus	--
Isoform0020810	pos:135-1040	--	0.156823	0.180014	0.106374	0.617043	0.566104	0.564534	3.94322	0.0105075	0.0691052	up	--	--	--	--	--	--	IPR003441: NAC domain;IPR036093: NAC domain superfamily	Nucleus	--
Isoform0020877	pos:1-1359	--	1.54942	1.67033	1.57975	3.38086	3.14394	3.40397	2.06871	3.16454e-05	0.00444844	up	GO:0045493 xylan catabolic process	GO:0005576 extracellular region	GO:0009044 xylan 1,4-beta-xylosidase activity	--	K15920	ko00520: Amino sugar and nucleotide sugar metabolism;ko01100: Metabolic pathways	IPR044993: Beta-D-xylosidase;IPR002772: Glycoside hydrolase family 3 C-terminal domain;IPR036881: Glycoside hydrolase family 3 C-terminal domain superfamily;IPR017853: Glycoside hydrolase superfamily;IPR026891: Fibronectin type III-like domain;IPR013783: Immunoglobulin-like fold	Cytoplasm	--
Isoform0020904	pos:34-1299	--	1.94116	2.52059	2.23346	0.900178	1.23144	1.40811	0.528696	0.0212879	0.101686	down	--	GO:0000139 Golgi membrane;GO:0016021 integral component of membrane	GO:0016757 glycosyltransferase activity	G: Carbohydrate transport and metabolism;M: Cell wall/membrane/envelope biogenesis	K08238	--	IPR008630: Glycosyltransferase 34;IPR029044: Nucleotide-diphospho-sugar transferases	Extracell	--
Isoform0020914	pos:2-1324	--	24.4447	28.9148	26.2	15.1633	15.0807	14.6026	0.563686	0.00506686	0.0467835	down	GO:0009658 chloroplast organization;GO:0015979 photosynthesis;GO:0015995 chlorophyll biosynthetic process;GO:1901401 regulation of tetrapyrrole metabolic process	GO:0009535 chloroplast thylakoid membrane;GO:0009706 chloroplast inner membrane	GO:0003729 mRNA binding;GO:0046872 metal ion binding;GO:0048529 magnesium-protoporphyrin IX monomethyl ester (oxidative) cyclase activity	--	K04035	ko00860: Porphyrin metabolism;ko01100: Metabolic pathways;ko01110: Biosynthesis of secondary metabolites	IPR009078: Ferritin-like superfamily;IPR008434: Magnesium-protoporphyrin IX monomethyl ester [oxidative] cyclase;IPR003251: Rubrerythrin, diiron-binding domain	chloroplast	--
Isoform0021030	pos:45-1241	--	0.17601	0.183435	0.22153	0.345588	0.366562	0.35457	1.83609	0.00986651	0.066628	up	GO:0009909 regulation of flower development	GO:0005634 nucleus	GO:0008270 zinc ion binding	K: Transcription	K12135	ko04712: Circadian rhythm - plant	IPR000315: B-box-type zinc finger;IPR010402: CCT domain;IPR045281: Zinc finger protein CONSTANS-like	Nucleus	--
Isoform0021041	pos:135-1373	--	0.20836	0.321353	0.202269	0.471182	0.568036	0.328067	1.86792	0.0474704	0.161148	up	GO:0006468 protein phosphorylation	--	GO:0004674 protein serine/threonine kinase activity;GO:0005524 ATP binding	T: Signal transduction mechanisms	K14498	ko04016: MAPK signaling pathway - plant;ko04075: Plant hormone signal transduction	IPR000719: Protein kinase domain;IPR008271: Serine/threonine-protein kinase, active site;IPR017441: Protein kinase, ATP binding site;IPR011009: Protein kinase-like domain superfamily	Extracell	--
Isoform0021052	pos:45-1151	--	0.121616	0.153035	0.144637	0.191291	0.285354	0.241722	1.7133	0.0252699	0.112587	up	--	--	--	--	--	--	IPR005174: Domain unknown function DUF295	chloroplast	--
Isoform0021081	pos:2-1447	--	0.116131	0	0.219734	0	0	0	0	0	0	down	--	--	GO:0008194 UDP-glycosyltransferase activity	G: Carbohydrate transport and metabolism;C: Energy production and conversion	K17193	ko00942: Anthocyanin biosynthesis	IPR002213: UDP-glucuronosyl/UDP-glucosyltransferase	Plasma membrane	--
Isoform0021102	pos:92-1093	--	4.56557	4.89527	4.5972	9.15162	8.35206	8.61157	1.85767	7.57826e-05	0.00650288	up	GO:0005975 carbohydrate metabolic process	GO:0046658 anchored component of plasma membrane	GO:0042972 licheninase activity	--	K19891	ko00500: Starch and sucrose metabolism;ko01100: Metabolic pathways	IPR044965: Glycoside hydrolase family 17, plant;IPR000490: Glycoside hydrolase family 17;IPR017853: Glycoside hydrolase superfamily	chloroplast	CS pos: 28-29. VES-IG. Pr: 0.6038
Isoform0021191	pos:63-1040	--	1.1168	0.987013	0.953247	0.516326	0.529501	0.55131	0.522443	0.00208803	0.02848	down	GO:0006353 DNA-templated transcription, termination;GO:0006355 regulation of transcription, DNA-templated;GO:0071472 cellular response to salt stress	GO:0009507 chloroplast;GO:0042646 plastid nucleoid	GO:0003690 double-stranded DNA binding;GO:0003729 mRNA binding	K: Transcription;R: General function prediction only	K15032	--	IPR003690: Transcription termination factor, mitochondrial/chloroplastic;IPR038538: MTERF superfamily, mitochondrial/chloroplastic	chloroplast	--
Isoform0021192	pos:166-1200	--	0.502296	0.405008	0.361572	0.29058	0.298731	0.234624	0.649343	0.0275033	0.118541	down	GO:0006486 protein glycosylation	GO:0000139 Golgi membrane;GO:0016021 integral component of membrane	GO:0016758 hexosyltransferase activity	G: Carbohydrate transport and metabolism	K20854	--	IPR002659: Glycosyl transferase, family 31;IPR025298: Domain of unknown function DUF4094	chloroplast	--
Isoform0021201	pos:2-1057	--	0.0870768	0	0	0	0	0	0	0	0	down	--	GO:0005874 microtubule	GO:0008017 microtubule binding	--	--	--	IPR033337: MT-associated protein TORTIFOLIA1/SPIRAL2-like	Nucleus	--
Isoform0021288	pos:3-1229	--	6.29334	5.5881	6.27024	23.227	22.207	23.6076	3.80359	0.000110979	0.00721083	up	GO:0009072 aromatic amino acid family metabolic process	--	GO:0003868 4-hydroxyphenylpyruvate dioxygenase activity;GO:0046872 metal ion binding	E: Amino acid transport and metabolism	K00457	ko00130: Ubiquinone and other terpenoid-quinone biosynthesis;ko00350: Tyrosine metabolism;ko00360: Phenylalanine metabolism;ko01100: Metabolic pathways;ko01240: Biosynthesis of cofactors	IPR004360: Glyoxalase/fosfomycin resistance/dioxygenase domain;IPR029068: Glyoxalase/Bleomycin resistance protein/Dihydroxybiphenyl dioxygenase;IPR041735: 4-hydroxyphenylpyruvate dioxygenase, C-terminal;IPR005956: 4-hydroxyphenylpyruvate dioxygenase;IPR037523: Vicinal oxygen chelate (VOC) domain;IPR041736: 4-hydroxyphenylpyruvate dioxygenase, N-terminal	Mitochondrion	--
Isoform0021305	pos:35-1114	--	1.16358	1.07169	1.02941	0.566916	0.5187	0.551454	0.501448	0.000182942	0.00926549	down	--	--	GO:0003824 catalytic activity	R: General function prediction only	--	--	IPR029058: Alpha/Beta hydrolase fold;IPR000639: Epoxide hydrolase-like;IPR000073: Alpha/beta hydrolase fold-1	chloroplast	--
Isoform0021344	pos:467-925	--	0.163728	0.153327	0.109294	0.293498	0.328388	0.264331	2.07862	0.0137338	0.0792948	up	--	--	--	C: Energy production and conversion	--	--	--	Mitochondrion	--
Isoform0021391	pos:137-1450	--	0.599479	0.513474	0.645754	3.44385	3.66333	3.38842	5.96779	0.00047149	0.0150866	up	--	--	--	R: General function prediction only	K17609	--	IPR036249: Thioredoxin-like superfamily;IPR012336: Thioredoxin-like fold;IPR046349: C1-like domain superfamily;IPR013766: Thioredoxin domain;IPR004146: DC1	chloroplast	CS pos: 27-28. TRR-QG. Pr: 0.2260
Isoform0021405	pos:163-1359	--	1.23857	1.59681	1.48233	0.797277	0.727501	0.850058	0.550023	0.0049959	0.0464397	down	--	GO:0000139 Golgi membrane;GO:0016021 integral component of membrane	GO:0016413 O-acetyltransferase activity	--	K23877	--	IPR029962: Trichome birefringence-like family;IPR025846: Trichome birefringence-like, N-terminal domain;IPR026057: PC-Esterase	Endoplasmic reticulum	CS pos: 24-25. VAG-QE. Pr: 0.3895
Isoform0021414	pos:39-1184	--	0	0	0	0.027104	0	0	inf	0	0	up	--	--	GO:0016788 hydrolase activity, acting on ester bonds	--	K01206	ko00511: Other glycan degradation	IPR001087: GDSL lipase/esterase;IPR036514: SGNH hydrolase superfamily;IPR035669: GDSL lipase/esterase-like, plant	Cytoplasm	CS pos: 34-35. AAA-AP. Pr: 0.5182
Isoform0021415	pos:99-1151	--	0.122764	0.18551	0.168694	0.321916	0.439744	0.413938	2.46473	0.0054467	0.0481377	up	--	--	GO:0016491 oxidoreductase activity;GO:0046872 metal ion binding	Q: Secondary metabolites biosynthesis, transport and catabolism;R: General function prediction only	K24028	--	IPR044861: Isopenicillin N synthase-like, Fe(2+) 2OG dioxygenase domain;IPR027443: Isopenicillin N synthase-like superfamily;IPR026992: Non-haem dioxygenase N-terminal domain;IPR005123: Oxoglutarate/iron-dependent dioxygenase	chloroplast	--
Isoform0021439	pos:97-1260	--	12.604	13.0123	12.5558	3.43456	3.47372	3.27272	0.266713	3.24256e-06	0.00139592	down	GO:0015979 photosynthesis;GO:0015995 chlorophyll biosynthetic process	GO:0009507 chloroplast	GO:0016630 protochlorophyllide reductase activity	Q: Secondary metabolites biosynthesis, transport and catabolism	K00218	ko00860: Porphyrin metabolism;ko01100: Metabolic pathways;ko01110: Biosynthesis of secondary metabolites	IPR005979: Light-dependent protochlorophyllide reductase;IPR002347: Short-chain dehydrogenase/reductase SDR;IPR036291: NAD(P)-binding domain superfamily	chloroplast	--
Isoform0021446	pos:20-1081	--	0.0606665	0	0	0	0	0	0	0	0	down	GO:0032259 methylation	--	GO:0008171 O-methyltransferase activity;GO:0030774 anthranilate N-methyltransferase activity;GO:0046983 protein dimerization activity	R: General function prediction only	K22588	ko00380: Tryptophan metabolism;ko01100: Metabolic pathways;ko01110: Biosynthesis of secondary metabolites	IPR012967: Plant methyltransferase dimerisation;IPR001077: O-methyltransferase domain;IPR036388: Winged helix-like DNA-binding domain superfamily;IPR029063: S-adenosyl-L-methionine-dependent methyltransferase superfamily;IPR016461: O-methyltransferase COMT-type;IPR036390: Winged helix DNA-binding domain superfamily	Cytoplasm	--
Isoform0021456	pos:117-1199	--	16.8751	16.0829	15.7272	43.9352	41.7271	42.6364	2.63527	7.50036e-06	0.0020665	up	--	--	--	--	--	--	IPR009770: Domain of unknown function DUF1338	chloroplast	--
Isoform0021469	pos:45-1076	--	0.202725	0.270058	0.27907	0.13492	0	0.140223	0.54893	0.0250465	0.112194	down	--	--	GO:0003723 RNA binding	--	--	--	IPR012677: Nucleotide-binding alpha-beta plait domain superfamily;IPR000504: RNA recognition motif domain;IPR035979: RNA-binding domain superfamily	Nucleus	--
Isoform0021483	pos:72-1169	--	0	0	0	0	0	0.0384313	inf	0	0	up	--	--	--	--	K00430	ko00940: Phenylpropanoid biosynthesis;ko01100: Metabolic pathways;ko01110: Biosynthesis of secondary metabolites	IPR000823: Plant peroxidase;IPR002016: Haem peroxidase;IPR010255: Haem peroxidase superfamily;IPR019793: Peroxidases heam-ligand binding site;IPR033905: Secretory peroxidase;IPR019794: Peroxidase, active site	chloroplast	CS pos: 49-50. ASA-MP. Pr: 0.4936
Isoform0021491	pos:104-1240	--	14.3285	17.3135	16.9496	25.8282	25.2546	24.6331	1.55821	0.013912	0.0795898	up	GO:0042183 formate catabolic process	GO:0005739 mitochondrion;GO:0009326 formate dehydrogenase complex;GO:0009507 chloroplast	GO:0008863 formate dehydrogenase (NAD+) activity;GO:0016616 oxidoreductase activity, acting on the CH-OH group of donors, NAD or NADP as acceptor;GO:0051287 NAD binding	C: Energy production and conversion	K00122	ko00630: Glyoxylate and dicarboxylate metabolism;ko01100: Metabolic pathways;ko01200: Carbon metabolism	IPR006140: D-isomer specific 2-hydroxyacid dehydrogenase, NAD-binding domain;IPR029753: D-isomer specific 2-hydroxyacid dehydrogenase, NAD-binding domain conserved site;IPR033689: NAD-dependent formate dehydrogenase;IPR006139: D-isomer specific 2-hydroxyacid dehydrogenase, catalytic domain;IPR029752: D-isomer specific 2-hydroxyacid dehydrogenase, NAD-binding domain conserved site 1;IPR036291: NAD…	Mitochondrion	--
Isoform0021503	pos:176-1243	--	3.13017	3.90763	3.72972	2.3359	2.23074	2.39802	0.646821	0.016582	0.0874445	down	--	--	GO:0016788 hydrolase activity, acting on ester bonds	--	K01206	ko00511: Other glycan degradation	IPR035669: GDSL lipase/esterase-like, plant;IPR036514: SGNH hydrolase superfamily;IPR001087: GDSL lipase/esterase	Mitochondrion	--
Isoform0021509	pos:226-1248	--	1.25779	0.910017	0.927079	0.629814	0.684954	0.628589	0.627925	0.04143	0.148013	down	GO:0006468 protein phosphorylation	--	GO:0004674 protein serine/threonine kinase activity;GO:0005524 ATP binding	T: Signal transduction mechanisms	K14498	ko04016: MAPK signaling pathway - plant;ko04075: Plant hormone signal transduction	IPR000719: Protein kinase domain;IPR017441: Protein kinase, ATP binding site;IPR011009: Protein kinase-like domain superfamily;IPR008271: Serine/threonine-protein kinase, active site	Cytoplasm	--
Isoform0021563	pos:65-1264	--	1.4507	1.51978	1.40961	0.862523	0.774276	0.884079	0.575531	0.0011228	0.021292	down	--	--	--	Q: Secondary metabolites biosynthesis, transport and catabolism	K11816	ko00380: Tryptophan metabolism;ko01100: Metabolic pathways	IPR036188: FAD/NAD(P)-binding domain superfamily	Cytoplasm	--
Isoform0021588	pos:20-1231	--	0	0	0	0.0824392	0.139962	0.0569261	inf	0	0	up	--	--	GO:0016491 oxidoreductase activity;GO:0046872 metal ion binding	Q: Secondary metabolites biosynthesis, transport and catabolism;R: General function prediction only	K24028	--	IPR026992: Non-haem dioxygenase N-terminal domain;IPR027443: Isopenicillin N synthase-like superfamily;IPR044861: Isopenicillin N synthase-like, Fe(2+) 2OG dioxygenase domain;IPR005123: Oxoglutarate/iron-dependent dioxygenase	Cytoplasm	--
Isoform0021592	pos:3-1112	--	39.1291	36.4381	36.9256	18.449	18.599	18.9672	0.497944	0.000256698	0.0111204	down	GO:0009228 thiamine biosynthetic process;GO:0052837 thiazole biosynthetic process	GO:0005829 cytosol;GO:0009570 chloroplast stroma	GO:0005506 iron ion binding;GO:0016763 pentosyltransferase activity	R: General function prediction only	K03146	ko00730: Thiamine metabolism;ko01100: Metabolic pathways;ko01240: Biosynthesis of cofactors	IPR036188: FAD/NAD(P)-binding domain superfamily;IPR027495: Thiamine thiazole synthase;IPR002922: Thiazole biosynthetic enzyme Thi4 family	chloroplast	--
Isoform0021605	pos:13-1245	--	0	0	0	0.110277	0	0.0548031	inf	0	0	up	GO:0080037 negative regulation of cytokinin-activated signaling pathway;GO:2000762 regulation of phenylpropanoid metabolic process	--	--	R: General function prediction only	--	--	IPR001810: F-box domain;IPR044595: F-box/kelch-repeat protein KMD1-4;IPR006652: Kelch repeat type 1;IPR015915: Kelch-type beta propeller	chloroplast	--
Isoform0021628	pos:14-1189	--	0.447634	0.457934	0.514269	0.278903	0.257775	0.213534	0.528379	0.00519463	0.0476439	down	GO:0005975 carbohydrate metabolic process;GO:1901135 carbohydrate derivative metabolic process	--	GO:0016853 isomerase activity;GO:0097367 carbohydrate derivative binding	--	K06041	ko01100: Metabolic pathways;ko01250: Biosynthesis of nucleotide sugars	IPR000644: CBS domain;IPR004800: Phosphosugar isomerase, KdsD/KpsF-type;IPR001347: SIS domain;IPR046348: SIS domain superfamily;IPR046342: CBS domain superfamily;IPR035474: KpsF-like, SIS domain	chloroplast	--
Isoform0021649	pos:122-1357	--	0.522841	0.322923	0.34189	0.645406	0.849228	0.58084	1.74754	0.0440516	0.154495	up	GO:0005975 carbohydrate metabolic process	--	GO:0004553 hydrolase activity, hydrolyzing O-glycosyl compounds	--	K19891	ko00500: Starch and sucrose metabolism;ko01100: Metabolic pathways	IPR000490: Glycoside hydrolase family 17;IPR017853: Glycoside hydrolase superfamily;IPR044965: Glycoside hydrolase family 17, plant	Plasma membrane	CS pos: 27-28. VSA-QQ. Pr: 0.8980
Isoform0021686	pos:19-1284	--	0.140927	0.120021	0.160404	0.0475621	0.0339561	0.0358917	0.27865	0.00082427	0.018819	down	--	--	--	--	--	--	IPR021763: Protein of unknown function DUF3326	chloroplast	--
Isoform0021733	pos:99-1190	--	0	0	0	0	0.144245	0.229589	inf	0	0	up	--	--	--	--	--	--	IPR029058: Alpha/Beta hydrolase fold;IPR000073: Alpha/beta hydrolase fold-1	chloroplast	--
Isoform0021779	pos:107-1222	--	1.64163	1.73566	1.51624	2.41989	2.62194	2.48226	1.53756	0.00173498	0.0258112	up	GO:0071704 organic substance metabolic process	--	GO:0008270 zinc ion binding;GO:0016491 oxidoreductase activity	Q: Secondary metabolites biosynthesis, transport and catabolism	K00083	ko00940: Phenylpropanoid biosynthesis;ko01100: Metabolic pathways;ko01110: Biosynthesis of secondary metabolites	IPR013149: Alcohol dehydrogenase-like, C-terminal;IPR002328: Alcohol dehydrogenase, zinc-type, conserved site;IPR036291: NAD(P)-binding domain superfamily;IPR013154: Alcohol dehydrogenase, N-terminal;IPR011032: GroES-like superfamily;IPR020843: Polyketide synthase, enoylreductase domain	Cytoplasm	--
Isoform0021785	pos:194-862	--	0.220042	0.241195	0.216542	0.413517	0.370623	0.392509	1.73604	0.000285925	0.0116253	up	--	--	GO:0005525 GTP binding	--	--	--	IPR027417: P-loop containing nucleoside triphosphate hydrolase;IPR006703: AIG1-type guanine nucleotide-binding (G) domain;IPR045058: GTPase GIMA/IAN/Toc	Cytoplasm	--
Isoform0021864	pos:78-1280	--	11.5491	11.4178	11.0971	6.9305	7.08255	7.07056	0.61894	2.8268e-05	0.00414277	down	GO:0015995 chlorophyll biosynthetic process	GO:0009507 chloroplast	GO:0033728 divinyl chlorophyllide a 8-vinyl-reductase activity;GO:0051744 3,8-divinyl protochlorophyllide a 8-vinyl reductase activity	G: Carbohydrate transport and metabolism	K19073	ko00860: Porphyrin metabolism;ko01100: Metabolic pathways;ko01110: Biosynthesis of secondary metabolites	IPR016040: NAD(P)-binding domain;IPR044201: Divinyl reductase-like;IPR036291: NAD(P)-binding domain superfamily	chloroplast	--
Isoform0021872	pos:70-1191	--	0.566463	0.692704	0.657773	1.45048	1.31338	1.39595	2.17003	0.00167093	0.0256905	up	--	--	GO:0016491 oxidoreductase activity;GO:0046872 metal ion binding	Q: Secondary metabolites biosynthesis, transport and catabolism;R: General function prediction only	K05278	ko00941: Flavonoid biosynthesis;ko01100: Metabolic pathways;ko01110: Biosynthesis of secondary metabolites	IPR026992: Non-haem dioxygenase N-terminal domain;IPR027443: Isopenicillin N synthase-like superfamily;IPR044861: Isopenicillin N synthase-like, Fe(2+) 2OG dioxygenase domain;IPR005123: Oxoglutarate/iron-dependent dioxygenase	Cytoplasm	--
Isoform0021915	pos:86-1123	--	0.0721371	0	0	0	0	0	0	0	0	down	GO:0006487 protein N-linked glycosylation;GO:0071555 cell wall organization	GO:0000139 Golgi membrane;GO:0005789 endoplasmic reticulum membrane;GO:0016021 integral component of membrane	GO:0004581 dolichyl-phosphate beta-glucosyltransferase activity	R: General function prediction only	K00729	ko00510: N-Glycan biosynthesis;ko01100: Metabolic pathways	IPR035518: Dolichyl-phosphate beta-glucosyltransferase;IPR001173: Glycosyltransferase 2-like;IPR029044: Nucleotide-diphospho-sugar transferases	chloroplast	--
Isoform0021953	pos:53-1135	--	0.701863	1.43626	1.25337	2.77232	2.97985	3.32799	2.67733	0.036567	0.137854	up	--	--	--	--	--	--	IPR009770: Domain of unknown function DUF1338	chloroplast	--
Isoform0021981	pos:189-1232	--	0.479274	0.569016	0.469168	0.252948	0.261271	0.247967	0.502279	0.00545793	0.0481377	down	--	GO:0016021 integral component of membrane	GO:0046872 metal ion binding	T: Signal transduction mechanisms	--	--	IPR045266: Copper-dependent monooxygenases, DOMON domain;IPR017214: Cytochrome b561 and DOMON domain-containing protein;IPR005018: DOMON domain;IPR006593: Cytochrome b561/ferric reductase transmembrane	Cytoplasm	--
Isoform0021993	pos:248-1111	--	0.603603	0.571919	0.566411	0.250095	0.268709	0.26734	0.451305	1.56085e-05	0.00298643	down	GO:0006221 pyrimidine nucleotide biosynthetic process	GO:0005737 cytoplasm	GO:0033862 UMP kinase activity	--	K09903	ko00240: Pyrimidine metabolism;ko01100: Metabolic pathways;ko01232: Nucleotide metabolism;ko01240: Biosynthesis of cofactors	IPR001048: Aspartate/glutamate/uridylate kinase;IPR015963: Uridylate kinase, bacteria;IPR036393: Acetylglutamate kinase-like superfamily;IPR011817: Uridylate kinase	Cytoplasm	--
Isoform0022004	pos:1-1185	--	0.659448	0.842337	0.749994	0.353895	0.405892	0.400155	0.515122	0.00282922	0.034249	down	--	--	GO:0003924 GTPase activity;GO:0005525 GTP binding	R: General function prediction only	K13427	ko00220: Arginine biosynthesis;ko00330: Arginine and proline metabolism;ko01100: Metabolic pathways;ko01110: Biosynthesis of secondary metabolites;ko04626: Plant-pathogen interaction	IPR030378: Circularly permuted (CP)-type guanine nucleotide-binding (G) domain;IPR044229: NO-associated protein 1;IPR027417: P-loop containing nucleoside triphosphate hydrolase;IPR006073: GTP binding domain	Cytoplasm	--
Isoform0022007	pos:464-1231	--	0.0612938	0.0551303	0.0662254	0.121774	0.0910311	0.123644	1.84205	0.0122114	0.0751595	up	--	--	--	--	K06911	--	IPR012093: Pirin;IPR003829: Pirin, N-terminal domain;IPR014710: RmlC-like jelly roll fold;IPR011051: RmlC-like cupin domain superfamily;IPR008778: Pirin, C-terminal domain	chloroplast	CS pos: 24-25. GFS-DH. Pr: 0.2852
Isoform0022011	pos:129-596	--	0.625011	0.538288	0.683633	1.20346	1.05172	1.17413	1.85676	0.00343387	0.038522	up	GO:0006952 defense response	--	--	--	--	--	IPR044750: SRC2/BAP, C2 domain;IPR035892: C2 domain superfamily;IPR000008: C2 domain	chloroplast	--
Isoform0022018	pos:33-1259	--	2.13179	1.8717	2.10342	0.910216	1.11515	1.00472	0.496173	0.00101743	0.0204316	down	GO:0008652 cellular amino acid biosynthetic process;GO:0009073 aromatic amino acid family biosynthetic process;GO:0009423 chorismate biosynthetic process	GO:0009507 chloroplast	GO:0003849 3-deoxy-7-phosphoheptulonate synthase activity	--	K01626	ko00400: Phenylalanine, tyrosine and tryptophan biosynthesis;ko01100: Metabolic pathways;ko01110: Biosynthesis of secondary metabolites;ko01230: Biosynthesis of amino acids	IPR013785: Aldolase-type TIM barrel;IPR002480: DAHP synthetase, class II	Cytoplasm	--
Isoform0022020	pos:94-1179	--	0	0.104984	0.0798485	1.4503	1.38253	1.47906	15.5524	0.0283348	0.120714	up	--	--	--	--	--	--	IPR004238: Late embryogenesis abundant protein, LEA_4 subgroup	Nucleus	--
Isoform0022139	pos:30-1118	--	3.02032	2.66212	2.82235	1.21102	1.2531	1.22428	0.433685	0.000991469	0.020086	down	--	--	GO:0008168 methyltransferase activity	I: Lipid transport and metabolism;R: General function prediction only	K05928	ko00130: Ubiquinone and other terpenoid-quinone biosynthesis;ko01100: Metabolic pathways;ko01110: Biosynthesis of secondary metabolites;ko01240: Biosynthesis of cofactors	IPR029063: S-adenosyl-L-methionine-dependent methyltransferase superfamily;IPR013216: Methyltransferase type 11	chloroplast	--
Isoform0022145	pos:173-1054	--	1.45935	1.31304	1.21615	0.805724	0.855277	0.855944	0.631046	0.00683092	0.0541863	down	--	--	--	P: Inorganic ion transport and metabolism	--	--	IPR007474: ApaG domain;IPR001943: UVR domain;IPR036767: ApaG domain superfamily	chloroplast	--
Isoform0022155	pos:105-1100	--	0.0912366	0.0921152	0.0716209	0.197389	0.281861	0.260219	2.90019	0.00190626	0.0270398	up	--	--	GO:0016491 oxidoreductase activity;GO:0046872 metal ion binding	Q: Secondary metabolites biosynthesis, transport and catabolism;R: General function prediction only	K00475	ko00941: Flavonoid biosynthesis;ko01100: Metabolic pathways;ko01110: Biosynthesis of secondary metabolites	IPR027443: Isopenicillin N synthase-like superfamily;IPR005123: Oxoglutarate/iron-dependent dioxygenase;IPR026992: Non-haem dioxygenase N-terminal domain;IPR044861: Isopenicillin N synthase-like, Fe(2+) 2OG dioxygenase domain	Cytoplasm	--
Isoform0022165	pos:109-1140	--	0.650432	0.576485	0.486793	0.186034	0.311586	0.309484	0.470969	0.0283957	0.120809	down	--	--	--	V: Defense mechanisms	K09753	ko00940: Phenylpropanoid biosynthesis;ko01100: Metabolic pathways;ko01110: Biosynthesis of secondary metabolites	IPR001509: NAD-dependent epimerase/dehydratase;IPR036291: NAD(P)-binding domain superfamily	Cytoplasm	--
Isoform0022228|m.267	type:dumb-complete len:294 strand:+ pos:109-990	--	5.14788	4.52798	4.5692	2.71872	1.98799	2.46478	0.503437	0.00821303	0.0595488	down	--	--	--	--	--	--	--	Nucleus	--
Isoform0022232	pos:95-1195	--	1.23944	1.04297	1.03125	1.76583	1.91571	1.78182	1.64874	0.00621092	0.0517928	up	GO:0009809 lignin biosynthetic process	--	GO:0008270 zinc ion binding;GO:0016616 oxidoreductase activity, acting on the CH-OH group of donors, NAD or NADP as acceptor;GO:0045551 cinnamyl-alcohol dehydrogenase activity	Q: Secondary metabolites biosynthesis, transport and catabolism	K00083	ko00940: Phenylpropanoid biosynthesis;ko01100: Metabolic pathways;ko01110: Biosynthesis of secondary metabolites	IPR036291: NAD(P)-binding domain superfamily;IPR013149: Alcohol dehydrogenase-like, C-terminal;IPR011032: GroES-like superfamily;IPR020843: Polyketide synthase, enoylreductase domain;IPR013154: Alcohol dehydrogenase, N-terminal;IPR002328: Alcohol dehydrogenase, zinc-type, conserved site	Cytoplasm	--
Isoform0022253	pos:276-923	--	1.36181	1.05123	1.01933	0.424484	0.470632	0.351774	0.363273	0.00131137	0.0231608	down	GO:0006353 DNA-templated transcription, termination;GO:0006355 regulation of transcription, DNA-templated;GO:0031564 transcription antitermination	--	GO:0003723 RNA binding	--	--	--	IPR011605: NusB antitermination factor;IPR006027: NusB/RsmB/TIM44;IPR035926: NusB-like superfamily	Cytoplasm	--
Isoform0022257	pos:91-1200	--	1.94528	1.98018	1.87901	4.82134	4.57473	4.74864	2.43687	2.19506e-06	0.00116305	up	--	--	GO:0016788 hydrolase activity, acting on ester bonds	--	K01206	ko00511: Other glycan degradation	IPR035669: GDSL lipase/esterase-like, plant;IPR001087: GDSL lipase/esterase;IPR036514: SGNH hydrolase superfamily	chloroplast	--
Isoform0022317	pos:59-1039	--	0.549439	0.693373	0.615879	0.185071	0.210908	0.24467	0.344678	0.000619531	0.0162127	down	--	--	GO:0005525 GTP binding;GO:0046872 metal ion binding	R: General function prediction only	K03978	--	IPR019987: GTP-binding protein, ribosome biogenesis, YsxC;IPR006073: GTP binding domain;IPR030393: EngB-type guanine nucleotide-binding (G) domain;IPR027417: P-loop containing nucleoside triphosphate hydrolase	chloroplast	--
Isoform0022403	pos:1-1203	--	11.9184	12.1432	13.4301	19.0817	18.8189	19.553	1.53244	0.00436384	0.0435625	up	GO:0006633 fatty acid biosynthetic process;GO:0031408 oxylipin biosynthetic process	--	GO:0010181 FMN binding;GO:0016491 oxidoreductase activity	C: Energy production and conversion;R: General function prediction only	K05894	ko00592: alpha-Linolenic acid metabolism;ko01100: Metabolic pathways;ko01110: Biosynthesis of secondary metabolites	IPR045247: Oxidoreductase Oye-like;IPR001155: NADH:flavin oxidoreductase/NADH oxidase, N-terminal;IPR013785: Aldolase-type TIM barrel	Cytoplasm	--
Isoform0022416	pos:324-1040	--	0.447671	0.474213	0.515303	0.334289	0.28735	0.284745	0.630665	0.00270037	0.0331553	down	GO:0045492 xylan biosynthetic process	GO:0000139 Golgi membrane	--	--	K18801	--	IPR021148: Polysaccharide biosynthesis domain;IPR006514: IRX15/IRX15L/IGXM	chloroplast	--
Isoform0022421	pos:82-990	--	1.73878	1.5051	1.48369	4.03273	4.17572	4.27887	2.64138	0.00111338	0.021292	up	--	--	GO:0030246 carbohydrate binding	--	K26380	--	IPR001229: Jacalin-like lectin domain;IPR036404: Jacalin-like lectin domain superfamily;IPR033734: Jacalin-like lectin domain, plant	chloroplast	--
Isoform0022428	pos:596-1126	--	0.328208	0.204654	0.252417	0.172942	0.145168	0.143349	0.587637	0.0463852	0.158785	down	--	--	--	--	--	--	--	Mitochondrion	--
Isoform0022473	pos:149-1078	--	1.50881	1.60794	1.60487	3.20796	3.19202	3.2444	2.0426	0.000494929	0.0153884	up	GO:0009972 cytidine deamination	GO:0005829 cytosol	GO:0004126 cytidine deaminase activity;GO:0008270 zinc ion binding	F: Nucleotide transport and metabolism	K01489	ko00240: Pyrimidine metabolism;ko01100: Metabolic pathways;ko01232: Nucleotide metabolism	IPR002125: Cytidine and deoxycytidylate deaminase domain;IPR016193: Cytidine deaminase-like;IPR013171: Cytidine/deoxycytidylate deaminase, zinc-binding domain;IPR006263: Cytidine deaminase, homodimeric;IPR016192: APOBEC/CMP deaminase, zinc-binding	Cytoplasm	--
Isoform0022476	pos:270-962	--	0.219946	0.241708	0.226065	0.121373	0.125362	0.132871	0.551977	0.000105651	0.00721083	down	--	--	--	--	K13464	ko04075: Plant hormone signal transduction	IPR040390: TIFY/JAZ family;IPR010399: Tify domain;IPR018467: CO/COL/TOC1, conserved site	chloroplast	--
Isoform0022501	pos:184-1095	--	0.377486	0.483411	0.479932	0.26156	0.208522	0.276237	0.55661	0.00779717	0.0581135	down	GO:0000272 polysaccharide catabolic process;GO:0006032 chitin catabolic process;GO:0016998 cell wall macromolecule catabolic process	--	GO:0004568 chitinase activity	R: General function prediction only	K20547	ko00520: Amino sugar and nucleotide sugar metabolism;ko01100: Metabolic pathways;ko04016: MAPK signaling pathway - plant	IPR016283: Glycoside hydrolase, family 19;IPR000726: Glycoside hydrolase, family 19, catalytic;IPR023346: Lysozyme-like domain superfamily	Extracell	CS pos: 21-22. ADA-RR. Pr: 0.8924
Isoform0022524	pos:107-1033	--	9.08586	8.42281	7.30466	5.11722	5.65732	5.54816	0.657819	0.0111424	0.0715939	down	--	--	--	--	K14826	--	IPR013087: Zinc finger C2H2-type;IPR041232: Nucleoplasmin-like domain	Nucleus	--
Isoform0022542	pos:445-1170	--	0.199276	0.225943	0.218969	0.303614	0.361494	0.40091	1.65483	0.0133256	0.0782496	up	--	--	GO:0003924 GTPase activity;GO:0005525 GTP binding	U: Intracellular trafficking, secretion, and vesicular transport	K07904	ko04144: Endocytosis	IPR001806: Small GTPase;IPR027417: P-loop containing nucleoside triphosphate hydrolase;IPR005225: Small GTP-binding protein domain	Cytoplasm	--
Isoform0022584	pos:82-429	--	0.677893	0.531819	0.548427	1.06172	1.188	1.24954	1.99032	0.00300624	0.035579	up	GO:0009414 response to water deprivation;GO:0009631 cold acclimation;GO:0009737 response to abscisic acid	--	--	--	--	--	IPR000167: Dehydrin;IPR030513: Dehydrin, conserved site	Mitochondrion	--
Isoform0022589	pos:738-1202	--	0	0.0870883	0	0	0	0	0	0	0	down	--	--	--	Q: Secondary metabolites biosynthesis, transport and catabolism	K15095	ko00902: Monoterpenoid biosynthesis;ko01110: Biosynthesis of secondary metabolites	IPR002347: Short-chain dehydrogenase/reductase SDR;IPR036291: NAD(P)-binding domain superfamily	chloroplast	--
Isoform0022603	pos:2-1069	--	0.631194	0.606364	0.595251	1.41364	1.40619	1.50197	2.35802	8.77086e-06	0.00215763	up	--	GO:0016021 integral component of membrane	GO:0015293 symporter activity	R: General function prediction only	K08202	--	IPR036259: MFS transporter superfamily;IPR020846: Major facilitator superfamily domain;IPR005828: Major facilitator, sugar transporter-like	chloroplast	--
Isoform0022616	pos:56-1120	--	5.01369	4.63842	5.28031	7.53423	7.68513	7.5517	1.52494	0.00662616	0.0531327	up	GO:0006979 response to oxidative stress;GO:0042744 hydrogen peroxide catabolic process	GO:0005576 extracellular region	GO:0004601 peroxidase activity;GO:0020037 heme binding;GO:0046872 metal ion binding	--	K00430	ko00940: Phenylpropanoid biosynthesis;ko01100: Metabolic pathways;ko01110: Biosynthesis of secondary metabolites	IPR010255: Haem peroxidase superfamily;IPR033905: Secretory peroxidase;IPR019793: Peroxidases heam-ligand binding site;IPR000823: Plant peroxidase;IPR019794: Peroxidase, active site;IPR002016: Haem peroxidase	chloroplast	CS pos: 23-24. SEG-AS. Pr: 0.6073
Isoform0022617	pos:84-1178	--	0	0	0	0	0.0983998	0	inf	0	0	up	--	--	GO:0016788 hydrolase activity, acting on ester bonds	--	K01206	ko00511: Other glycan degradation	IPR001087: GDSL lipase/esterase;IPR036514: SGNH hydrolase superfamily	Mitochondrion	--
Isoform0022664	pos:97-1026	--	0.682994	0.861926	1.02375	1.63315	1.57844	1.32484	1.76606	0.0211936	0.101517	up	--	--	GO:0016491 oxidoreductase activity;GO:0046872 metal ion binding	Q: Secondary metabolites biosynthesis, transport and catabolism;R: General function prediction only	K05278	ko00941: Flavonoid biosynthesis;ko01100: Metabolic pathways;ko01110: Biosynthesis of secondary metabolites	IPR027443: Isopenicillin N synthase-like superfamily;IPR044861: Isopenicillin N synthase-like, Fe(2+) 2OG dioxygenase domain;IPR026992: Non-haem dioxygenase N-terminal domain;IPR005123: Oxoglutarate/iron-dependent dioxygenase	Cytoplasm	--
Isoform0022681	pos:183-1145	--	2.0396	2.18004	2.2119	3.39517	3.3602	3.01889	1.51974	0.00142513	0.0238236	up	--	--	GO:0003824 catalytic activity	I: Lipid transport and metabolism	K01259	ko00330: Arginine and proline metabolism;ko01100: Metabolic pathways	IPR000639: Epoxide hydrolase-like;IPR029058: Alpha/Beta hydrolase fold;IPR000073: Alpha/beta hydrolase fold-1	chloroplast	--
Isoform0022682	pos:63-1049	--	0.526765	0.523799	0.561995	0.918855	0.920272	0.905771	1.7022	0.0011524	0.0215698	up	--	--	GO:0016491 oxidoreductase activity;GO:0046872 metal ion binding	Q: Secondary metabolites biosynthesis, transport and catabolism;R: General function prediction only	K05278	ko00941: Flavonoid biosynthesis;ko01100: Metabolic pathways;ko01110: Biosynthesis of secondary metabolites	IPR005123: Oxoglutarate/iron-dependent dioxygenase;IPR027443: Isopenicillin N synthase-like superfamily;IPR044861: Isopenicillin N synthase-like, Fe(2+) 2OG dioxygenase domain;IPR026992: Non-haem dioxygenase N-terminal domain	Cytoplasm	--
Isoform0022700	pos:146-1165	--	0.574178	0.557358	0.566118	0.197594	0.252925	0.140717	0.348266	0.0235176	0.108639	down	--	GO:0005794 Golgi apparatus;GO:0016021 integral component of membrane	GO:0005338 nucleotide-sugar transmembrane transporter activity;GO:0005464 UDP-xylose transmembrane transporter activity;GO:0015297 antiporter activity	G: Carbohydrate transport and metabolism;E: Amino acid transport and metabolism	K15285	--	IPR004853: Sugar phosphate transporter domain	Plasma membrane	--
Isoform0022710	pos:101-1123	--	1.55307	1.43902	1.57024	2.47654	2.63047	2.82041	1.73758	0.000470975	0.0150866	up	GO:0005975 carbohydrate metabolic process	GO:0046658 anchored component of plasma membrane	GO:0004553 hydrolase activity, hydrolyzing O-glycosyl compounds	--	K19891	ko00500: Starch and sucrose metabolism;ko01100: Metabolic pathways	IPR017853: Glycoside hydrolase superfamily;IPR044965: Glycoside hydrolase family 17, plant;IPR000490: Glycoside hydrolase family 17	chloroplast	CS pos: 24-25. VLA-FI. Pr: 0.4049
Isoform0022711	pos:2-1162	--	5.66678	5.39038	5.58982	3.16406	3.39405	3.39484	0.597884	0.000157471	0.00847393	down	--	--	GO:0016702 oxidoreductase activity, acting on single donors with incorporation of molecular oxygen, incorporation of two atoms of oxygen;GO:0046872 metal ion binding	Q: Secondary metabolites biosynthesis, transport and catabolism	K09840	ko00906: Carotenoid biosynthesis;ko01100: Metabolic pathways;ko01110: Biosynthesis of secondary metabolites	IPR004294: Carotenoid oxygenase	Cytoplasm	--
Isoform0022727	pos:3-1331	--	0.438367	0.305116	0	0	0	0	0	0	0	down	--	--	--	O: Posttranslational modification, protein turnover, chaperones	K03032	ko03050: Proteasome	IPR040623: 26S proteasome regulatory subunit RPN2, C-terminal;IPR002015: Proteasome/cyclosome repeat;IPR011989: Armadillo-like helical;IPR016024: Armadillo-type fold	chloroplast	CS pos: 21-22. SDA-IS. Pr: 0.3030
Isoform0022735	pos:101-1150	--	2.72924	1.98047	2.23525	1.39771	1.45171	1.24795	0.589976	0.0166595	0.0877297	down	--	--	--	V: Defense mechanisms	K09753	ko00940: Phenylpropanoid biosynthesis;ko01100: Metabolic pathways;ko01110: Biosynthesis of secondary metabolites	IPR036291: NAD(P)-binding domain superfamily;IPR001509: NAD-dependent epimerase/dehydratase	chloroplast	--
Isoform0022739	pos:40-1101	--	0	0	0	0	0.249773	0.113603	inf	0	0	up	--	--	GO:0016491 oxidoreductase activity;GO:0046872 metal ion binding	Q: Secondary metabolites biosynthesis, transport and catabolism;R: General function prediction only	K05277	ko00941: Flavonoid biosynthesis;ko01100: Metabolic pathways;ko01110: Biosynthesis of secondary metabolites	IPR044861: Isopenicillin N synthase-like, Fe(2+) 2OG dioxygenase domain;IPR005123: Oxoglutarate/iron-dependent dioxygenase;IPR026992: Non-haem dioxygenase N-terminal domain;IPR027443: Isopenicillin N synthase-like superfamily	Cytoplasm	--
Isoform0022796	pos:1-1158	--	0.949795	0.81332	0.814088	1.63296	1.61689	1.7477	1.93914	0.00170662	0.0257314	up	--	--	GO:0003755 peptidyl-prolyl cis-trans isomerase activity	O: Posttranslational modification, protein turnover, chaperones	K01802	--	IPR001179: FKBP-type peptidyl-prolyl cis-trans isomerase domain;IPR046357: Peptidyl-prolyl cis-trans isomerase domain superfamily;IPR011990: Tetratricopeptide-like helical domain superfamily;IPR019734: Tetratricopeptide repeat	Cytoplasm	--
Isoform0022811	pos:118-1089	--	1.0434	0.939496	0.916407	0.48343	0.511696	0.539563	0.52933	0.000311888	0.0123464	down	GO:0009658 chloroplast organization;GO:0009965 leaf morphogenesis;GO:0010239 chloroplast mRNA processing;GO:0071482 cellular response to light stimulus	GO:0009501 amyloplast;GO:0009507 chloroplast;GO:0009509 chromoplast;GO:0009513 etioplast;GO:0009537 proplastid	--	--	--	--	IPR034563: Protein PALE CRESS	chloroplast	--
Isoform0022907	pos:73-1080	--	1.56057	1.58745	1.58382	3.4824	3.78861	3.56703	2.29045	0.00057533	0.0156691	up	--	--	GO:0018580 nitronate monooxygenase activity	--	--	--	IPR013785: Aldolase-type TIM barrel;IPR004136: Nitronate monooxygenase	Cytoplasm	--
Isoform0022985	pos:183-1133	--	2.76426	2.75055	2.5734	4.44891	4.41606	4.66371	1.67264	0.000101062	0.00721083	up	GO:0005975 carbohydrate metabolic process	GO:0046658 anchored component of plasma membrane	GO:0004553 hydrolase activity, hydrolyzing O-glycosyl compounds	--	K19891	ko00500: Starch and sucrose metabolism;ko01100: Metabolic pathways	IPR000490: Glycoside hydrolase family 17;IPR017853: Glycoside hydrolase superfamily;IPR044965: Glycoside hydrolase family 17, plant	Cytoplasm	--
Isoform0023052	pos:42-1154	--	0.832596	0.913749	0.88342	0.555022	0.643408	0.493501	0.643377	0.0190318	0.0954082	down	--	GO:0009536 plastid;GO:0016021 integral component of membrane	--	--	--	--	IPR009631: CGLD27-like	chloroplast	--
Isoform0023057	pos:268-1065	--	1.46658	1.35625	1.50763	2.19873	2.31903	2.04762	1.5161	0.00105088	0.0208127	up	--	--	--	--	--	--	IPR036866: Ribonuclease Z/Hydroxyacylglutathione hydrolase-like	Cytoplasm	--
Isoform0023066	pos:3-989	--	1.61617	1.77117	1.62802	2.38519	2.61468	2.65393	1.52607	0.000740024	0.0180755	up	GO:0006629 lipid metabolic process	GO:0005746 mitochondrial respirasome	GO:0008081 phosphoric diester hydrolase activity	T: Signal transduction mechanisms	--	--	IPR017946: PLC-like phosphodiesterase, TIM beta/alpha-barrel domain superfamily	Cytoplasm	--
Isoform0023097	pos:55-966	--	0.576237	0.562292	0.618505	0.343465	0.312526	0.318347	0.554536	0.00013114	0.00785471	down	GO:0000055 ribosomal large subunit export from nucleus;GO:0000447 endonucleolytic cleavage in ITS1 to separate SSU-rRNA from 5.8S rRNA and LSU-rRNA from tricistronic rRNA transcript (SSU-rRNA, 5.8S rRNA, LSU-rRNA);GO:0042273 ribosomal large subunit biogenesis	GO:0005730 nucleolus;GO:0030687 preribosome, large subunit precursor	--	J: Translation, ribosomal structure and biogenesis	K14852	--	IPR007023: Ribosomal biogenesis regulatory protein	Nucleus	--
Isoform0023132	pos:3-1010	--	2.1299	2.06298	2.10663	1.02801	0.990491	0.849106	0.455212	0.004579	0.0445833	down	GO:0000103 sulfate assimilation	--	GO:0004781 sulfate adenylyltransferase (ATP) activity;GO:0005524 ATP binding	P: Inorganic ion transport and metabolism	K13811	ko00230: Purine metabolism;ko00261: Monobactam biosynthesis;ko00450: Selenocompound metabolism;ko00920: Sulfur metabolism;ko01100: Metabolic pathways;ko01110: Biosynthesis of secondary metabolites	IPR002650: Sulphate adenylyltransferase;IPR014729: Rossmann-like alpha/beta/alpha sandwich fold;IPR015947: PUA-like superfamily;IPR025980: ATP-sulfurylase PUA-like domain;IPR024951: Sulphate adenylyltransferase catalytic domain	Cytoplasm	--
Isoform0023180	pos:1-1005	--	5.88534	5.50158	4.86784	3.59241	3.45035	3.62829	0.656487	0.0123901	0.0753498	down	GO:0000226 microtubule cytoskeleton organization;GO:0000278 mitotic cell cycle;GO:0007017 microtubule-based process	GO:0005737 cytoplasm;GO:0005874 microtubule	GO:0005200 structural constituent of cytoskeleton;GO:0005525 GTP binding	Z: Cytoskeleton	K07375	ko04145: Phagosome;ko04814: Motor proteins	IPR003008: Tubulin/FtsZ, GTPase domain;IPR018316: Tubulin/FtsZ, 2-layer sandwich domain;IPR002453: Beta tubulin;IPR023123: Tubulin, C-terminal;IPR000217: Tubulin;IPR036525: Tubulin/FtsZ, GTPase domain superfamily;IPR037103: Tubulin/FtsZ-like, C-terminal domain;IPR017975: Tubulin, conserved site;IPR008280: Tubulin/FtsZ, C-terminal	Cytoplasm	--
Isoform0023218	pos:11-1006	--	1.25943	1.16836	1.31631	0.655555	0.628847	0.687768	0.526741	0.000202627	0.00996924	down	GO:0000272 polysaccharide catabolic process;GO:0006032 chitin catabolic process;GO:0016998 cell wall macromolecule catabolic process	--	GO:0004568 chitinase activity	R: General function prediction only	K20547	ko00520: Amino sugar and nucleotide sugar metabolism;ko01100: Metabolic pathways;ko04016: MAPK signaling pathway - plant	IPR016283: Glycoside hydrolase, family 19;IPR000726: Glycoside hydrolase, family 19, catalytic;IPR023346: Lysozyme-like domain superfamily	Mitochondrion	--
Isoform0023219	pos:86-1162	--	2.29482	2.20738	1.87403	3.16186	3.51322	3.44812	1.58765	0.00683622	0.0541863	up	--	--	GO:0016491 oxidoreductase activity;GO:0046872 metal ion binding	Q: Secondary metabolites biosynthesis, transport and catabolism;R: General function prediction only	K23145	ko00999: Biosynthesis of various plant secondary metabolites;ko01110: Biosynthesis of secondary metabolites	IPR027443: Isopenicillin N synthase-like superfamily;IPR026992: Non-haem dioxygenase N-terminal domain;IPR044861: Isopenicillin N synthase-like, Fe(2+) 2OG dioxygenase domain;IPR005123: Oxoglutarate/iron-dependent dioxygenase	Cytoplasm	--
Isoform0023252	pos:95-1018	--	0	0	0	0	0.0238952	0	inf	0	0	up	--	--	GO:0003677 DNA binding;GO:0003700 DNA-binding transcription factor activity	--	K25784	--	IPR004827: Basic-leucine zipper domain;IPR044168: bZIP transcription factor RISBZ3/4/5;IPR045314: G-box binding factor 1-like, bZIP domain, plant;IPR046347: Basic-leucine zipper domain superfamily	Nucleus	--
Isoform0023269	pos:2-451	--	5.07203	3.56014	4.19362	2.99536	2.37484	3.03784	0.655557	0.034977	0.134593	down	GO:0006334 nucleosome assembly;GO:0030261 chromosome condensation;GO:0045910 negative regulation of DNA recombination	GO:0000786 nucleosome;GO:0005634 nucleus	GO:0003690 double-stranded DNA binding;GO:0030527 structural constituent of chromatin;GO:0031492 nucleosomal DNA binding	--	K11275	--	IPR005818: Linker histone H1/H5, domain H15;IPR005819: Linker histone H1/H5;IPR036390: Winged helix DNA-binding domain superfamily;IPR036388: Winged helix-like DNA-binding domain superfamily	Nucleus	--
Isoform0023273	pos:2-985	--	1.08705	1.03858	1.09206	0.704973	0.706008	0.688124	0.652364	0.000163976	0.00862187	down	GO:0006952 defense response;GO:0017148 negative regulation of translation	--	GO:0030598 rRNA N-glycosylase activity;GO:0090729 toxin activity	--	--	--	IPR046533: Protein of unknown function DUF6598	chloroplast	--
Isoform0023302	pos:212-1144	--	0.444482	0.35721	0.382451	0.203438	0.223219	0.238706	0.561895	0.00280287	0.0340496	down	--	GO:0016021 integral component of membrane	--	--	--	--	--	Plasma membrane	--
Isoform0023310	pos:60-953	--	1.29424	1.24148	1.0444	0.81703	0.75263	0.698549	0.633558	0.00668829	0.053419	down	GO:0045492 xylan biosynthetic process	GO:0000139 Golgi membrane	--	--	K18801	--	IPR006514: IRX15/IRX15L/IGXM;IPR021148: Polysaccharide biosynthesis domain	chloroplast	--
Isoform0023314	pos:376-858	--	0.35063	0.369065	0.373794	0.168224	0.192684	0.208116	0.520375	0.00516497	0.047562	down	GO:0006749 glutathione metabolic process;GO:0042221 response to chemical	--	GO:0004364 glutathione transferase activity	O: Posttranslational modification, protein turnover, chaperones	K00799	ko00480: Glutathione metabolism;ko01100: Metabolic pathways	IPR004046: Glutathione S-transferase, C-terminal;IPR010987: Glutathione S-transferase, C-terminal-like;IPR036282: Glutathione S-transferase, C-terminal domain superfamily;IPR034347: Glutathione S-transferases Phi, C-terminal	chloroplast	--
Isoform0023385	pos:109-879	--	15.5935	16.8176	16.2953	37.9799	36.3901	37.2572	2.29184	4.10181e-05	0.00496734	up	GO:0009415 response to water	--	--	--	--	--	IPR030513: Dehydrin, conserved site;IPR000167: Dehydrin	Nucleus	--
Isoform0023438	pos:171-971	--	0.211187	0.177068	0.188484	0.108359	0.138293	0.112753	0.623168	0.00908249	0.0630647	down	GO:0006508 proteolysis	--	GO:0008234 cysteine-type peptidase activity	O: Posttranslational modification, protein turnover, chaperones	K08596	--	IPR003653: Ulp1 protease family, C-terminal catalytic domain;IPR038765: Papain-like cysteine peptidase superfamily	Nucleus	--
Isoform0023523	pos:21-1034	--	0	0.136059	0	0	0	0	0	0	0	down	--	--	--	--	--	--	--	chloroplast	--
Isoform0023534	pos:43-741	--	0.822927	0.815577	0.838768	1.71992	1.68592	1.71876	2.06865	4.99544e-07	0.00101507	up	--	--	--	--	--	--	IPR003496: ABA/WDS induced protein	chloroplast	--
Isoform0023538	pos:116-1078	--	0.488584	0.507268	0.515181	0.741172	1.00987	0.893216	1.74997	0.0227856	0.106405	up	--	GO:0016021 integral component of membrane;GO:0070469 respirasome	GO:0009916 alternative oxidase activity;GO:0046872 metal ion binding;GO:0102721 ubiquinol:oxygen oxidoreductase activity	--	K17893	--	IPR002680: Alternative oxidase;IPR038659: Alternative oxidase superfamily	chloroplast	--
Isoform0023599	pos:92-928	--	3.24508	3.31019	2.99068	2.09944	2.13691	1.72522	0.624513	0.0100146	0.0670411	down	GO:0015031 protein transport	GO:0005886 plasma membrane;GO:0016021 integral component of membrane;GO:0030658 transport vesicle membrane	--	U: Intracellular trafficking, secretion, and vesicular transport	K19995	--	IPR007273: SCAMP	Plasma membrane	--
Isoform0023609	pos:313-1032	--	0.632889	0.647312	0.528541	1.75952	1.87719	1.69719	2.94896	0.000853161	0.0188957	up	--	GO:0005737 cytoplasm	GO:0004719 protein-L-isoaspartate (D-aspartate) O-methyltransferase activity	O: Posttranslational modification, protein turnover, chaperones	K00573	--	IPR000682: Protein-L-isoaspartate(D-aspartate) O-methyltransferase;IPR029063: S-adenosyl-L-methionine-dependent methyltransferase superfamily	Mitochondrion	--
Isoform0023617	pos:16-1053	--	0	0	0	0.085291	0	0	inf	0	0	up	--	--	GO:0016491 oxidoreductase activity;GO:0046872 metal ion binding	Q: Secondary metabolites biosynthesis, transport and catabolism;R: General function prediction only	K24028	--	IPR044861: Isopenicillin N synthase-like, Fe(2+) 2OG dioxygenase domain;IPR027443: Isopenicillin N synthase-like superfamily;IPR026992: Non-haem dioxygenase N-terminal domain;IPR005123: Oxoglutarate/iron-dependent dioxygenase	chloroplast	--
Isoform0023620	pos:95-1087	--	0.321229	0.253208	0.287581	0.517469	0.412004	0.457414	1.60888	0.00753373	0.0568995	up	--	--	GO:0016491 oxidoreductase activity;GO:0046872 metal ion binding	Q: Secondary metabolites biosynthesis, transport and catabolism;R: General function prediction only	K05933	ko00270: Cysteine and methionine metabolism;ko01100: Metabolic pathways;ko01110: Biosynthesis of secondary metabolites	IPR044861: Isopenicillin N synthase-like, Fe(2+) 2OG dioxygenase domain;IPR026992: Non-haem dioxygenase N-terminal domain;IPR027443: Isopenicillin N synthase-like superfamily;IPR005123: Oxoglutarate/iron-dependent dioxygenase	Cytoplasm	--
Isoform0023629	pos:105-1016	--	0.581927	0.529005	0.602198	0.351857	0.319187	0.293229	0.562872	0.00133472	0.0233339	down	GO:0008652 cellular amino acid biosynthetic process;GO:0009423 chorismate biosynthetic process;GO:0016310 phosphorylation	--	GO:0004765 shikimate kinase activity;GO:0005524 ATP binding	--	K00891	ko00400: Phenylalanine, tyrosine and tryptophan biosynthesis;ko01100: Metabolic pathways;ko01110: Biosynthesis of secondary metabolites;ko01230: Biosynthesis of amino acids	IPR023000: Shikimate kinase, conserved site;IPR031322: Shikimate kinase/gluconokinase;IPR000623: Shikimate kinase/Threonine synthase-like 1;IPR027417: P-loop containing nucleoside triphosphate hydrolase	chloroplast	--
Isoform0023660	pos:229-1092	--	1.41753	1.86902	1.40715	2.51307	2.42919	3.38002	1.77307	0.0157596	0.0855009	up	--	GO:0005615 extracellular space	--	--	--	--	IPR006766: Protein EXORDIUM-like	chloroplast	--
Isoform0023664	pos:91-459	--	5.65925	5.92412	6.12918	16.9567	17.4268	16.6582	2.88167	2.18984e-05	0.00359134	up	--	--	GO:0009055 electron transfer activity	--	--	--	IPR039391: Phytocyanin;IPR003245: Phytocyanin domain;IPR008972: Cupredoxin;IPR041846: Early nodulin-like protein domain	chloroplast	CS pos: 22-23. ASA-AQ. Pr: 0.7083
Isoform0023686	pos:120-875	--	3.52115	3.82991	3.85855	6.35417	6.27034	6.22102	1.68119	0.00224668	0.0295536	up	--	--	--	--	--	--	IPR008802: Rubber elongation factor	Cytoplasm	--
Isoform0023692	pos:54-962	--	0.652656	0.580448	0.613565	1.23167	1.27034	1.16591	1.98624	0.000143277	0.00795344	up	GO:0006535 cysteine biosynthetic process from serine	GO:0005829 cytosol	GO:0009001 serine O-acetyltransferase activity	E: Amino acid transport and metabolism	K00640	ko00270: Cysteine and methionine metabolism;ko00543: Exopolysaccharide biosynthesis;ko00920: Sulfur metabolism;ko01100: Metabolic pathways;ko01110: Biosynthesis of secondary metabolites;ko01200: Carbon metabolism;ko01230: Biosynthesis of amino acids	IPR045304: Serine acetyltransferase, LbH domain;IPR001451: Hexapeptide repeat;IPR010493: Serine acetyltransferase, N-terminal;IPR011004: Trimeric LpxA-like superfamily;IPR005881: Serine O-acetyltransferase;IPR018357: Hexapeptide transferase, conserved site;IPR042122: Serine acetyltransferase, N-terminal domain superfamily	Mitochondrion	--
Isoform0023701	pos:97-1080	--	4.22022	3.46157	3.50511	12.0666	11.0772	11.2215	3.07192	0.000959107	0.0198074	up	--	--	--	O: Posttranslational modification, protein turnover, chaperones	--	--	IPR021109: Aspartic peptidase domain superfamily;IPR001461: Aspartic peptidase A1 family;IPR032861: Xylanase inhibitor, N-terminal;IPR033121: Peptidase family A1 domain;IPR032799: Xylanase inhibitor, C-terminal	chloroplast	--
Isoform0023717	pos:2-958	--	0.137807	0.3321	0.192789	1.06226	0.857849	0.722842	3.98818	0.0178811	0.0915727	up	GO:0035970 peptidyl-threonine dephosphorylation	--	GO:0004722 protein serine/threonine phosphatase activity;GO:0017018 myosin phosphatase activity;GO:0046872 metal ion binding	T: Signal transduction mechanisms	K17506	--	IPR001932: PPM-type phosphatase-like domain;IPR000222: PPM-type phosphatase, divalent cation binding;IPR036457: PPM-type phosphatase-like domain superfamily	chloroplast	--
Isoform0023841	pos:108-974	--	1.97533	2.25438	2.01276	1.43629	1.46003	1.26182	0.666105	0.00290091	0.0348883	down	--	--	--	--	K08235	--	IPR016455: Xyloglucan endotransglucosylase/hydrolase;IPR010713: Xyloglucan endo-transglycosylase, C-terminal;IPR013320: Concanavalin A-like lectin/glucanase domain superfamily;IPR000757: Glycoside hydrolase family 16;IPR008263: Glycoside hydrolase, family 16, active site;IPR044791: Beta-glucanase/XTH	Extracell	CS pos: 21-22. AAA-SF. Pr: 0.4783
Isoform0023853	pos:120-935	--	0.303774	0.271376	0.400242	2.17591	1.87629	2.0876	6.2947	0.0014256	0.0238236	up	--	--	--	R: General function prediction only	K07025	--	IPR036412: HAD-like superfamily;IPR010237: Pyrimidine 5-nucleotidase;IPR006439: HAD hydrolase, subfamily IA;IPR023214: HAD superfamily	Cytoplasm	--
Isoform0023864	pos:93-872	--	0.520417	0.395528	0.486652	1.02555	1.17112	1.0559	2.31896	0.00309953	0.0362471	up	--	--	--	--	--	--	IPR042971: Late embryogenesis abundant protein, SMP subgroup;IPR007011: Late embryogenesis abundant protein, SMP subgroup domain	Cytoplasm	--
Isoform0023886	pos:1-1056	--	2.80018	2.81722	2.48379	4.41505	3.92838	4.20429	1.54888	0.00137714	0.0236021	up	GO:0006508 proteolysis	--	GO:0004190 aspartic-type endopeptidase activity	O: Posttranslational modification, protein turnover, chaperones	--	--	IPR021109: Aspartic peptidase domain superfamily;IPR033121: Peptidase family A1 domain;IPR032799: Xylanase inhibitor, C-terminal;IPR032861: Xylanase inhibitor, N-terminal;IPR001461: Aspartic peptidase A1 family	chloroplast	CS pos: 20-21. TSG-KP. Pr: 0.5096
Isoform0023889	pos:2-928	--	0.947561	0.978517	1.02535	2.75578	2.3783	2.51225	2.59072	0.000264608	0.0111817	up	GO:0006508 proteolysis	--	GO:0008234 cysteine-type peptidase activity	O: Posttranslational modification, protein turnover, chaperones	K01373	ko04626: Plant-pathogen interaction	IPR000668: Peptidase C1A, papain C-terminal;IPR013201: Cathepsin propeptide inhibitor domain (I29);IPR038765: Papain-like cysteine peptidase superfamily;IPR025660: Cysteine peptidase, histidine active site;IPR000169: Cysteine peptidase, cysteine active site;IPR039417: Papain-like cysteine endopeptidase;IPR025661: Cysteine peptidase, asparagine active site	Cytoplasm	--
Isoform0023906	pos:104-880	--	14.2395	13.9837	12.2335	25.6332	20.8014	25.7652	1.78462	0.00389215	0.0409836	up	GO:0009617 response to bacterium	GO:0005789 endoplasmic reticulum membrane;GO:0016021 integral component of membrane	--	U: Intracellular trafficking, secretion, and vesicular transport	K20723	--	IPR003388: Reticulon	Plasma membrane	--
Isoform0023931	pos:236-805	--	1.78289	1.74247	1.70779	1.18602	1.20206	0.96796	0.641304	0.0208047	0.100282	down	--	--	--	--	--	--	IPR018971: Protein of unknown function DUF1997	chloroplast	--
Isoform0023974	pos:41-802	--	0.989748	1.27334	1.45386	0.174258	0.286505	0.227545	0.185181	0.000970007	0.0198261	down	GO:0006396 RNA processing	--	GO:0004525 ribonuclease III activity	--	K11145	--	IPR000999: Ribonuclease III domain;IPR036389: Ribonuclease III, endonuclease domain superfamily;IPR008226: Mini-ribonuclease 3 family	chloroplast	--
Isoform0023980	pos:155-943	--	0.660869	0.742544	0.826471	2.67326	2.52777	2.61392	3.50464	0.00157981	0.0250155	up	--	--	--	--	--	--	IPR044828: Stem-specific protein TSJT1-like;IPR024286: Domain of unknown function DUF3700;IPR029055: Nucleophile aminohydrolases, N-terminal	chloroplast	--
Isoform0024008	pos:42-809	--	0.541845	0.452382	0.470998	0.324649	0.224232	0.200026	0.511121	0.0299258	0.123407	down	--	--	GO:0004045 aminoacyl-tRNA hydrolase activity	J: Translation, ribosomal structure and biogenesis	K01056	--	IPR001328: Peptidyl-tRNA hydrolase;IPR036416: Peptidyl-tRNA hydrolase superfamily;IPR018171: Peptidyl-tRNA hydrolase, conserved site	chloroplast	--
Isoform0024128	pos:165-557	--	2.62954	3.38554	3.11401	7.1261	7.7232	6.55637	2.34478	0.00136602	0.0235818	up	--	--	--	--	--	--	IPR010417: Embryo-specific ATS3;IPR036392: PLAT/LH2 domain superfamily	chloroplast	--
Isoform0024143	pos:146-766	--	2.22028	2.07139	2.18756	4.84756	4.66302	4.46256	2.1566	1.99864e-05	0.00344166	up	GO:0015977 carbon fixation;GO:0015979 photosynthesis;GO:0110102 ribulose bisphosphate carboxylase complex assembly	--	GO:0044183 protein folding chaperone	--	--	--	IPR003435: Chaperonin-like RbcX;IPR038052: Chaperonin-like RbcX superfamily	chloroplast	--
Isoform0024155	pos:14-787	--	4.53539	3.35197	4.20209	1.36407	1.29397	1.33072	0.329937	0.00563381	0.0488122	down	GO:0015976 carbon utilization	--	GO:0004089 carbonate dehydratase activity;GO:0008270 zinc ion binding	P: Inorganic ion transport and metabolism	K01673	ko00910: Nitrogen metabolism;ko01100: Metabolic pathways	IPR015892: Carbonic anhydrase, prokaryotic-like, conserved site;IPR036874: Carbonic anhydrase superfamily;IPR045066: Beta carbonic anhydrases, cladeB;IPR001765: Carbonic anhydrase	chloroplast	--
Isoform0024167	pos:6-974	--	0.0330588	0.0389812	0.0216867	0.0730743	0.0712597	0.0454917	2.02531	0.038423	0.141829	up	--	--	--	V: Defense mechanisms	K09753	ko00940: Phenylpropanoid biosynthesis;ko01100: Metabolic pathways;ko01110: Biosynthesis of secondary metabolites	IPR036291: NAD(P)-binding domain superfamily;IPR001509: NAD-dependent epimerase/dehydratase	chloroplast	--
Isoform0024180	pos:95-463	--	7.96922	7.38826	7.61201	19.1377	21.2766	23.7096	2.7917	0.00148789	0.0241681	up	--	--	GO:0009055 electron transfer activity	--	--	--	IPR008972: Cupredoxin;IPR039391: Phytocyanin;IPR003245: Phytocyanin domain;IPR041846: Early nodulin-like protein domain	chloroplast	CS pos: 22-23. ASA-AQ. Pr: 0.7083
Isoform0024185	pos:55-840	--	0.673345	0.675868	0.672559	0.357849	0.393116	0.448341	0.593196	0.015033	0.08341	down	--	GO:0016020 membrane;GO:0016021 integral component of membrane	--	T: Signal transduction mechanisms	K24205	--	IPR006214: Bax inhibitor 1-related	Plasma membrane	--
Isoform0024228	pos:95-922	--	0.586833	0.62182	0.687628	0.384798	0.455387	0.400535	0.654291	0.0035859	0.039248	down	--	GO:0009507 chloroplast	GO:0008080 N-acetyltransferase activity	--	--	--	IPR000182: GNAT domain;IPR016181: Acyl-CoA N-acyltransferase	chloroplast	--
Isoform0024273	pos:83-826	--	1.28234	1.07323	1.36797	0.532535	0.657678	0.580037	0.475421	0.00161984	0.0253003	down	--	--	--	--	--	--	--	chloroplast	--
Isoform0024294	pos:111-680	--	0	0.506882	0.491082	0.326924	0.297989	0.355947	0.655241	0.00949621	0.0650845	down	--	--	GO:0005509 calcium ion binding	T: Signal transduction mechanisms	K13448	ko04626: Plant-pathogen interaction	IPR002048: EF-hand domain;IPR011992: EF-hand domain pair;IPR018247: EF-Hand 1, calcium-binding site	Nucleus	--
Isoform0024299	pos:83-757	--	0.101034	0.123157	0.152953	0.0428239	0.0488719	0.0505398	0.377139	0.00729296	0.0561272	down	GO:0006166 purine ribonucleoside salvage;GO:0006168 adenine salvage;GO:0044209 AMP salvage	GO:0005737 cytoplasm	GO:0003999 adenine phosphoribosyltransferase activity	F: Nucleotide transport and metabolism	K00759	ko00230: Purine metabolism;ko01100: Metabolic pathways;ko01232: Nucleotide metabolism	IPR000836: Phosphoribosyltransferase domain;IPR005764: Adenine phosphoribosyl transferase;IPR029057: Phosphoribosyltransferase-like	chloroplast	--
Isoform0024346	pos:83-826	--	20.4274	17.9834	19.2196	10.0519	9.44323	9.79919	0.508313	0.00057069	0.0156691	down	--	--	--	--	--	--	--	chloroplast	--
Isoform0024385	pos:32-922	--	1.01388	1.00838	1.01272	2.28692	2.23834	2.03382	2.16116	0.00214948	0.0289194	up	GO:0045493 xylan catabolic process	GO:0005576 extracellular region	GO:0004568 chitinase activity	M: Cell wall/membrane/envelope biogenesis	K01183	ko00520: Amino sugar and nucleotide sugar metabolism;ko01100: Metabolic pathways	IPR045321: Chitinase Cts1-like;IPR001223: Glycoside hydrolase family 18, catalytic domain;IPR017853: Glycoside hydrolase superfamily	chloroplast	CS pos: 30-31. AVA-TG. Pr: 0.3574
Isoform0024408	pos:144-869	--	0	0	0	0.170659	0.188689	0.155573	inf	0	0	up	GO:0006826 iron ion transport;GO:0006879 cellular iron ion homeostasis	GO:0009507 chloroplast	GO:0004322 ferroxidase activity;GO:0008199 ferric iron binding	P: Inorganic ion transport and metabolism	K00522	--	IPR012347: Ferritin-like;IPR009078: Ferritin-like superfamily;IPR001519: Ferritin;IPR008331: Ferritin/DPS protein domain;IPR009040: Ferritin-like diiron domain	Mitochondrion	--
Isoform0024481	pos:141-824	--	1.66616	2.2492	1.99982	3.07513	0	2.84572	1.50144	0.0289817	0.121946	up	--	--	--	--	--	--	IPR006843: Plastid lipid-associated protein/fibrillin conserved domain;IPR039633: Plastid-lipid-associated protein	chloroplast	--
Isoform0024499	pos:119-733	--	1.58114	1.64124	1.63393	2.6189	2.51579	2.55807	1.58408	9.98987e-06	0.00229367	up	--	GO:0005737 cytoplasm	GO:0120013 lipid transfer activity	S: Function unknown	--	--	IPR036497: Glycolipid transfer protein superfamily;IPR014830: Glycolipid transfer protein domain	Cytoplasm	--
Isoform0024501	pos:24-623	--	0.486369	0.467021	0.436575	0.751022	0.94084	0.83043	1.81464	0.00439373	0.0436477	up	--	--	GO:0004857 enzyme inhibitor activity	--	--	--	IPR035513: Invertase/pectin methylesterase inhibitor domain superfamily;IPR006501: Pectinesterase inhibitor domain;IPR034088: Pla a 1-like	Extracell	--
Isoform0024507	pos:171-821	--	0	0	0	0	0.242875	0.155359	inf	0	0	up	GO:0016192 vesicle-mediated transport	--	GO:0003924 GTPase activity;GO:0005525 GTP binding	R: General function prediction only	K07910	--	IPR001806: Small GTPase;IPR027417: P-loop containing nucleoside triphosphate hydrolase;IPR005225: Small GTP-binding protein domain	Nucleus	--
Isoform0024534	pos:78-749	--	0.647665	0.522342	0.605853	3.44618	3.06601	3.51421	5.64594	6.43515e-05	0.00615629	up	GO:0006412 translation	GO:0005840 ribosome	GO:0003735 structural constituent of ribosome	J: Translation, ribosomal structure and biogenesis	K02866	ko03010: Ribosome	IPR036920: Ribosomal protein L10e/L16 superfamily;IPR001197: Ribosomal protein L10e;IPR016180: Ribosomal protein L10e/L16;IPR018255: Ribosomal protein L10e, conserved site	chloroplast_Mitochondrion	--
Isoform0024586	pos:60-794	--	0.731254	0.544221	0.603785	0.322226	0.201579	0.231819	0.402086	0.00817271	0.0593814	down	GO:0009416 response to light stimulus;GO:0009768 photosynthesis, light harvesting in photosystem I	GO:0009522 photosystem I;GO:0009523 photosystem II;GO:0009535 chloroplast thylakoid membrane	GO:0016168 chlorophyll binding	--	K08910	ko00196: Photosynthesis - antenna proteins;ko01100: Metabolic pathways	IPR022796: Chlorophyll A-B binding protein;IPR001344: Chlorophyll A-B binding protein, plant and chromista	chloroplast	--
Isoform0024600	pos:78-758	--	3.37201	2.50261	2.56948	0.757318	0.815755	1.36127	0.347503	0.0136947	0.0792682	down	GO:0016192 vesicle-mediated transport	GO:0005783 endoplasmic reticulum;GO:0005794 Golgi apparatus;GO:0016021 integral component of membrane	--	U: Intracellular trafficking, secretion, and vesicular transport	K20359	--	IPR004895: Prenylated rab acceptor PRA1	vacuolar membrane	--
Isoform0024602	pos:273-845	--	0.126111	0.101403	0.139611	0.216147	0.237609	0.223251	1.84408	0.0161553	0.086251	up	--	--	--	P: Inorganic ion transport and metabolism	K22547	--	IPR036873: Rhodanese-like domain superfamily;IPR001763: Rhodanese-like domain	chloroplast	--
Isoform0024606	pos:59-964	--	0.66785	0.746083	0.713701	0.311122	0.363379	0.197491	0.409841	0.0337989	0.131455	down	GO:0009834 plant-type secondary cell wall biogenesis;GO:0045492 xylan biosynthetic process	GO:0000139 Golgi membrane;GO:0005794 Golgi apparatus	--	--	K18801	--	IPR021148: Polysaccharide biosynthesis domain;IPR006514: IRX15/IRX15L/IGXM	chloroplast	--
Isoform0024703	pos:57-785	--	7.28821	8.33837	8.25063	13.3751	13.402	13.2242	1.67529	0.00650058	0.0526359	up	GO:0006952 defense response	--	GO:0004869 cysteine-type endopeptidase inhibitor activity	--	--	--	IPR000010: Cystatin domain;IPR046350: Cystatin superfamily;IPR018073: Proteinase inhibitor I25, cystatin, conserved site;IPR027214: Cystatin	chloroplast	CS pos: 32-33. SLA-IG. Pr: 0.2295
Isoform0024761	pos:2-718	--	0.235028	0.196663	0.355694	0.532116	0.462214	0.58974	2.01181	0.039259	0.143496	up	GO:0006508 proteolysis	--	GO:0008234 cysteine-type peptidase activity	O: Posttranslational modification, protein turnover, chaperones	K25900	--	IPR000668: Peptidase C1A, papain C-terminal;IPR039417: Papain-like cysteine endopeptidase;IPR000118: Granulin;IPR025660: Cysteine peptidase, histidine active site;IPR037277: Granulin superfamily;IPR038765: Papain-like cysteine peptidase superfamily;IPR025661: Cysteine peptidase, asparagine active site	chloroplast	--
Isoform0024834	pos:73-837	--	0.548252	0.573912	0.610576	1.35064	1.27649	1.45611	2.35652	8.42268e-05	0.00675335	up	GO:0009691 cytokinin biosynthetic process	--	GO:0102682 N6-(Delta2-isopentenyl)-adenosine 5'-monophosphate phosphoribohydrolase activity	--	K22522	--	IPR005269: Cytokinin riboside 5'-monophosphate phosphoribohydrolase LOG;IPR031100: LOG family	Mitochondrion	--
Isoform0024889	pos:2-655	--	0.734281	0.765115	0.930664	1.63856	1.60681	1.57092	1.98197	0.00953935	0.0653151	up	--	--	--	R: General function prediction only	--	--	IPR023214: HAD superfamily;IPR006439: HAD hydrolase, subfamily IA;IPR041492: Haloacid dehalogenase-like hydrolase;IPR036412: HAD-like superfamily;IPR011949: HAD-superfamily hydrolase, subfamily IA, REG-2-like;IPR044924: HAD-superfamily hydrolase, subfamily IA, REG-2-like, capping domain superfamily	Cytoplasm	--
Isoform0024909	pos:55-843	--	0.920833	0.766421	0.820714	1.46561	1.30158	1.40131	1.6621	0.00249156	0.0318117	up	--	--	GO:0016491 oxidoreductase activity	R: General function prediction only	K08081	ko00960: Tropane, piperidine and pyridine alkaloid biosynthesis;ko01100: Metabolic pathways;ko01110: Biosynthesis of secondary metabolites	IPR036291: NAD(P)-binding domain superfamily;IPR020904: Short-chain dehydrogenase/reductase, conserved site;IPR045000: Tropinone reductase;IPR002347: Short-chain dehydrogenase/reductase SDR	Extracell	--
Isoform0025020	pos:10-834	--	0.778482	0.656124	0.708903	0.238795	0.236713	0.215181	0.322224	0.00011631	0.00741801	down	--	--	GO:0003723 RNA binding	--	K07574	--	IPR001890: RNA-binding, CRM domain;IPR035920: YhbY-like superfamily	chloroplast	--
Isoform0025044	pos:90-596	--	6.51185	5.76414	6.39973	9.5893	9.53898	9.27308	1.52076	0.00527951	0.0479495	up	--	--	--	--	--	--	IPR006016: UspA;IPR014729: Rossmann-like alpha/beta/alpha sandwich fold;IPR006015: Universal stress protein A family	chloroplast	--
Isoform0025053	pos:17-640	--	0.166594	0.113445	0.160077	0.231366	0.233988	0.325823	1.79766	0.0241798	0.110444	up	--	--	GO:0061929 gamma-glutamylaminecyclotransferase activity	S: Function unknown	K19761	--	IPR039126: Gamma-glutamylaminecyclotransferase;IPR013024: Gamma-glutamyl cyclotransferase-like;IPR009288: Gamma-glutamylcyclotransferase, AIG2-like domain;IPR036568: Gamma-glutamyl cyclotransferase-like superfamily	chloroplast	--
Isoform0025076	pos:131-601	--	0.343416	0.384753	0.439543	0.981257	0.966861	0.963527	2.49346	0.00573298	0.0493311	up	GO:0006457 protein folding;GO:0009408 response to heat;GO:0009651 response to salt stress;GO:0042542 response to hydrogen peroxide;GO:0051259 protein complex oligomerization	--	GO:0043621 protein self-association;GO:0051082 unfolded protein binding	O: Posttranslational modification, protein turnover, chaperones	K13993	ko04141: Protein processing in endoplasmic reticulum	IPR002068: Alpha crystallin/Hsp20 domain;IPR008978: HSP20-like chaperone	Cytoplasm	--
Isoform0025111	pos:144-575	--	0.32483	0.291075	0.425334	0.147336	0.178367	0.244707	0.547819	0.0335447	0.130836	down	--	--	--	--	--	--	--	Nucleus	--
Isoform0025117	pos:122-685	--	0.0897511	0.0751295	0.0580139	0.252143	0.22654	0.21974	3.13342	0.00696129	0.0547001	up	--	--	GO:0005509 calcium ion binding	T: Signal transduction mechanisms	K13448	ko04626: Plant-pathogen interaction	IPR002048: EF-hand domain;IPR011992: EF-hand domain pair;IPR018247: EF-Hand 1, calcium-binding site	chloroplast	--
Isoform0025183	pos:55-738	--	3.54875	3.3568	3.67116	5.20255	5.9264	5.85038	1.60535	0.00143455	0.0238236	up	GO:0006401 RNA catabolic process	GO:0005576 extracellular region	GO:0003723 RNA binding;GO:0004521 endoribonuclease activity;GO:0033897 ribonuclease T2 activity	A: RNA processing and modification	K01166	--	IPR001568: Ribonuclease T2-like;IPR036430: Ribonuclease T2-like superfamily;IPR018188: Ribonuclease T2, His active site 1;IPR033130: Ribonuclease T2, His active site 2;IPR033697: Ribonuclease T2, eukaryotic	Extracell	CS pos: 24-25. AQA-AD. Pr: 0.5671
Isoform0025214	pos:67-741	--	51.7465	46.2381	42.9217	86.6477	87.3221	92.3115	1.88978	0.00332538	0.0378599	up	GO:0006952 defense response	--	--	--	--	--	IPR037176: Osmotin/thaumatin-like superfamily;IPR001938: Thaumatin family;IPR017949: Thaumatin, conserved site	Extracell	CS pos: 22-23. ADA-AT. Pr: 0.8936
Isoform0025241	pos:64-603	--	0.434166	0.554606	0.582869	4.37323	4.84659	4.92833	9.00215	0.000422116	0.0143574	up	--	GO:0016021 integral component of membrane	GO:0022857 transmembrane transporter activity	--	--	--	IPR045238: Tim23-like	Nucleus	--
Isoform0025250	pos:247-618	--	0.415343	0.420347	0.513839	1.2411	1.3877	1.2762	2.8936	0.000969896	0.0198261	up	--	--	GO:0003743 translation initiation factor activity	J: Translation, ribosomal structure and biogenesis	K03113	--	IPR001950: SUI1 domain;IPR005874: Eukaryotic translation initiation factor SUI1;IPR036877: SUI1 domain superfamily	Cytoplasm	--
Isoform0025306	pos:215-631	--	3.60324	3.48152	3.57905	1.92929	2.00046	2.16619	0.571647	0.00188233	0.0269651	down	GO:0030042 actin filament depolymerization	GO:0015629 actin cytoskeleton	GO:0003779 actin binding	Z: Cytoskeleton	K05765	--	IPR017904: ADF/Cofilin;IPR002108: Actin-depolymerising factor homology domain;IPR029006: ADF-H/Gelsolin-like domain superfamily	chloroplast	--
Isoform0025308	pos:220-624	--	2.31781	2.70641	2.64764	7.95705	7.06728	8.12951	3.01802	7.64712e-05	0.00650288	up	GO:0006508 proteolysis;GO:0030163 protein catabolic process	--	--	--	--	--	IPR022935: ATP-dependent Clp protease adaptor protein ClpS;IPR014719: Ribosomal protein L7/L12, C-terminal/adaptor protein ClpS-like;IPR003769: Adaptor protein ClpS, core	Mitochondrion	--
Isoform0025317	pos:173-748	--	0	0	0	0.130568	0.112961	0	inf	0	0	up	--	--	--	--	--	--	--	chloroplast	--
Isoform0025348	pos:2-589	--	0	0	0	0.0827588	0.0860831	0.0291989	inf	0	0	up	GO:0034599 cellular response to oxidative stress	--	GO:0016688 L-ascorbate peroxidase activity;GO:0020037 heme binding	--	K00434	ko00053: Ascorbate and aldarate metabolism;ko00480: Glutathione metabolism;ko01100: Metabolic pathways	IPR019793: Peroxidases heam-ligand binding site;IPR002016: Haem peroxidase;IPR010255: Haem peroxidase superfamily;IPR002207: Class I peroxidase;IPR044831: Heme-binding peroxidase Ccp1-like	Mitochondrion	--
Isoform0025367	pos:150-611	--	1.01886	0.804084	0.734136	1.4765	1.72239	1.52341	1.84675	0.0118058	0.0739932	up	GO:0050896 response to stimulus	--	GO:0046872 metal ion binding	P: Inorganic ion transport and metabolism	K07213	--	IPR006121: Heavy metal-associated domain, HMA;IPR036163: Heavy metal-associated domain superfamily;IPR045181: Heavy metal binding protein HIPP/ATX1-like	chloroplast	--
Isoform0025371	pos:122-595	--	0.828976	0.977311	0.816053	1.39828	1.39788	1.18636	1.51869	0.00629772	0.0518177	up	--	--	--	--	--	--	IPR040414: PAM2-containing protein CID1/CID2	Mitochondrion	--
Isoform0025392	pos:22-606	--	0.933913	1.43561	1.24428	2.22737	1.82078	1.75382	1.60551	0.0410994	0.147214	up	--	--	--	--	--	--	IPR035992: Ricin B-like lectins;IPR040249: Ricin B-like lectin EULS3-like	Cytoplasm	--
Isoform0025436	pos:89-544	--	1.50472	1.25943	1.09536	1.86055	1.9704	1.96332	1.50129	0.0411319	0.147254	up	--	--	--	--	--	--	IPR040414: PAM2-containing protein CID1/CID2	chloroplast	--
Isoform0025448	pos:212-358	--	0.323234	0.309633	0	0.16445	0.180832	0	0.545584	0.0234156	0.108392	down	--	--	--	--	--	--	--	Mitochondrion	--
Isoform0025463	pos:78-602	--	10.044	10.1494	9.89072	42.1861	40.717	42.9152	4.18222	5.65772e-06	0.00170513	up	--	--	--	--	--	--	IPR036610: PEBP-like superfamily;IPR005247: YbhB/YbcL;IPR008914: Phosphatidylethanolamine-binding protein	chloroplast	--
Isoform0025472	pos:70-591	--	3.08672	3.81117	3.33016	1.87685	1.90498	1.56817	0.52307	0.00179806	0.0263612	down	--	GO:0016021 integral component of membrane	--	--	--	--	IPR009606: DESIGUAL/Modifying wall lignin-1/2	Extracell	--
Isoform0025477	pos:78-563	--	4.48039	4.61369	5.1374	19.308	19.2412	18.0029	3.97373	6.95474e-05	0.00634604	up	GO:0009415 response to water	--	--	--	--	--	IPR030513: Dehydrin, conserved site;IPR000167: Dehydrin	Nucleus	--
Isoform0025524	pos:52-258	--	0.555254	0.762024	0.474529	2.9076	2.80219	2.90456	4.80763	0.00724213	0.0558948	up	--	--	--	--	--	--	--	chloroplast	--
Isoform0025603	pos:59-613	--	0.223551	0.144677	0.250917	0.0883496	0.100178	0.0974111	0.461828	0.0410166	0.147079	down	--	--	--	--	--	--	IPR039926: Protein egg apparatus-1	chloroplast	--
Isoform0025624	pos:30-569	--	1.01167	1.02126	0.890976	2.07917	1.35823	2.26612	1.95065	0.0464471	0.158852	up	--	GO:0005576 extracellular region	GO:0004867 serine-type endopeptidase inhibitor activity	--	--	--	IPR000877: Proteinase inhibitor I12, Bowman-Birk;IPR035995: Bowman-Birk type proteinase inhibitor	Extracell	CS pos: 26-27. VAG-DV. Pr: 0.5203
Isoform0025633	pos:86-448	--	23.4668	32.7953	22.7928	17.1747	17.1423	15.0036	0.623878	0.0448033	0.156335	down	GO:0006869 lipid transport	--	GO:0008289 lipid binding	--	--	--	IPR000528: Plant non-specific lipid-transfer protein/Par allergen;IPR036312: Bifunctional inhibitor/plant lipid transfer protein/seed storage helical domain superfamily;IPR016140: Bifunctional inhibitor/plant lipid transfer protein/seed storage helical domain	chloroplast	CS pos: 28-29. VHA-AI. Pr: 0.8914
Isoform0025636	pos:99-584	--	1.69147	1.57853	1.85623	6.51052	6.38518	5.85653	3.6581	5.53721e-05	0.00560887	up	GO:0009269 response to desiccation	--	--	--	--	--	IPR013990: Water stress and hypersensitive response domain;IPR004864: Late embryogenesis abundant protein, LEA_2 subgroup;IPR045043: Late embryogenesis abundant protein Lea14-like	Cytoplasm	--
Isoform0025664	pos:3-674	--	0.25512	0.64916	0.673772	1.69485	2.06885	1.40841	3.27753	0.0454754	0.15748	up	--	--	--	--	K01601	ko00630: Glyoxylate and dicarboxylate metabolism;ko00710: Carbon fixation in photosynthetic organisms;ko01100: Metabolic pathways;ko01110: Biosynthesis of secondary metabolites;ko01200: Carbon metabolism	IPR000685: Ribulose bisphosphate carboxylase, large subunit, C-terminal;IPR033966: RuBisCO;IPR036376: Ribulose bisphosphate carboxylase, large subunit, C-terminal domain superfamily	Cytoplasm	--
Isoform0025696	pos:125-511	--	0.159092	0.0896927	0.10539	0.252219	0.227235	0.303048	2.20937	0.0246568	0.111734	up	--	GO:0005576 extracellular region	GO:0004867 serine-type endopeptidase inhibitor activity	--	--	--	IPR035995: Bowman-Birk type proteinase inhibitor;IPR000877: Proteinase inhibitor I12, Bowman-Birk	chloroplast	CS pos: 27-28. AES-SS. Pr: 0.6148
Isoform0025762	pos:3-518	--	6.38574	6.13564	6.57806	16.2441	16.8709	16.2892	2.58668	1.51412e-05	0.00297978	up	--	--	--	--	--	--	IPR039633: Plastid-lipid-associated protein;IPR006843: Plastid lipid-associated protein/fibrillin conserved domain	chloroplast	--
Isoform0025774	pos:50-430	--	0.93886	0.874502	0.879533	1.77736	1.6327	1.40797	1.78916	0.0081501	0.0593811	up	--	--	--	O: Posttranslational modification, protein turnover, chaperones	K03671	--	IPR036249: Thioredoxin-like superfamily;IPR013766: Thioredoxin domain	chloroplast	--
Isoform0025794	pos:85-399	--	6.42623	5.1861	5.32167	2.40031	2.20967	2.54559	0.422556	0.0010778	0.0209714	down	GO:0009627 systemic acquired resistance	--	GO:0005504 fatty acid binding	--	--	--	IPR036312: Bifunctional inhibitor/plant lipid transfer protein/seed storage helical domain superfamily;IPR016140: Bifunctional inhibitor/plant lipid transfer protein/seed storage helical domain;IPR039265: Putative lipid-transfer protein DIR1-like;IPR044741: Non-specific lipid-transfer protein-like	Extracell	CS pos: 27-28. VHG-VC. Pr: 0.6679
Isoform0025811	pos:75-278	--	2.38837	2.11378	2.01451	4.05089	3.74971	3.43248	1.72375	0.00146493	0.0239803	up	--	--	--	--	--	--	--	chloroplast	--
Isoform0025832	pos:2-325	--	0.0232749	0.0155997	0.0403894	0.0627611	0.177679	0.073408	3.95952	0.0356848	0.136251	up	--	--	GO:0046872 metal ion binding	P: Inorganic ion transport and metabolism	--	--	IPR000347: Metallothionein, family 15, plant	Mitochondrion	--
Isoform0025833	pos:68-490	--	46.1081	37.0433	41.3989	24.516	27.3312	30.9178	0.66451	0.0114006	0.072774	down	GO:0007034 vacuolar transport;GO:0007623 circadian rhythm;GO:0071482 cellular response to light stimulus	GO:0005768 endosome;GO:0009570 chloroplast stroma;GO:0009941 chloroplast envelope;GO:0098807 chloroplast thylakoid membrane protein complex	--	--	--	--	IPR009856: Light regulated Lir1	chloroplast	--
Isoform0025840	pos:85-399	--	3.5017	4.19046	4.08614	1.93062	2.31614	2.09698	0.538596	0.00132287	0.0233007	down	GO:0009627 systemic acquired resistance	--	GO:0005504 fatty acid binding	--	--	--	IPR036312: Bifunctional inhibitor/plant lipid transfer protein/seed storage helical domain superfamily;IPR016140: Bifunctional inhibitor/plant lipid transfer protein/seed storage helical domain;IPR044741: Non-specific lipid-transfer protein-like;IPR039265: Putative lipid-transfer protein DIR1-like	Extracell	CS pos: 27-28. VHG-VC. Pr: 0.5982
Isoform0025842	pos:68-499	--	2.8167	2.60381	2.64816	1.87432	1.76207	1.73295	0.665457	0.000270596	0.0113367	down	--	--	--	--	K02639	ko00195: Photosynthesis;ko01100: Metabolic pathways	IPR001041: 2Fe-2S ferredoxin-type iron-sulfur binding domain;IPR012675: Beta-grasp domain superfamily;IPR036010: 2Fe-2S ferredoxin-like superfamily;IPR010241: Ferredoxin [2Fe-2S], plant	chloroplast	--
Isoform0025847	pos:84-383	--	14.6243	15.1134	14.9612	10.0035	9.22915	9.46932	0.642119	0.000843904	0.0188419	down	GO:0043622 cortical microtubule organization	GO:0010005 cortical microtubule, transverse to long axis	--	--	K18635	--	IPR039613: Protein SPIRAL1-like	Mitochondrion	--
Isoform0025855	pos:35-352	--	20.9861	21.627	16.9179	42.5901	27.9179	52.8868	2.07278	0.049029	0.164257	up	--	GO:0005576 extracellular region	GO:0004867 serine-type endopeptidase inhibitor activity	--	--	--	IPR044167: Bowman-Birk type wound-induced proteinase inhibitor WIP1;IPR035995: Bowman-Birk type proteinase inhibitor;IPR000877: Proteinase inhibitor I12, Bowman-Birk	chloroplast	CS pos: 43-44. VNA-DF. Pr: 0.8217
Isoform0025887	pos:90-314	--	0.0279363	0.051101	0.0248736	0.074095	0.061139	0.106532	2.32666	0.0390853	0.143278	up	--	--	GO:0046872 metal ion binding	P: Inorganic ion transport and metabolism	--	--	IPR000347: Metallothionein, family 15, plant	chloroplast	--
Isoform0025894	pos:2-382	--	17.8074	17.2936	18.1588	26.9922	27.1935	28.1239	1.54544	2.39287e-05	0.00374593	up	--	--	GO:0004362 glutathione-disulfide reductase (NADPH) activity;GO:0097573 glutathione oxidoreductase activity	O: Posttranslational modification, protein turnover, chaperones	K03676	--	IPR011767: Glutaredoxin active site;IPR011899: Glutaredoxin, eukaryotic/virial;IPR036249: Thioredoxin-like superfamily;IPR014025: Glutaredoxin subgroup;IPR002109: Glutaredoxin	chloroplast	--
Isoform0025910	pos:75-260	--	0.0266612	0.0320175	0.026382	0.0793719	0.0544172	0.0951582	2.69157	0.0175671	0.0910243	up	--	--	--	--	--	--	IPR044671: Metallothionein-like protein 3	chloroplast	--
Isoform0025920	pos:69-332	--	1.35959	1.23123	1.25322	3.14012	2.85527	3.34924	2.43094	0.000229194	0.0105952	up	--	--	--	--	--	--	--	chloroplast	--
Isoform0025929	pos:87-377	--	0.0718419	0.0708268	0	0.140581	0.21428	0.228521	2.72605	0.023085	0.107266	up	--	--	--	--	--	--	--	chloroplast	--
Isoform0000005|m.2	type:dumb-complete len:2583 strand:+ pos:32-7780	--	0	0	0	0	0.0309358	0	inf	0	0	up	--	--	--	I: Lipid transport and metabolism	--	--	IPR015255: Vitellinogen, open beta-sheet;IPR015819: Lipid transport protein, beta-sheet shell;IPR001747: Vitellogenin, N-terminal;IPR015816: Vitellinogen, beta-sheet N-terminal;IPR011030: Lipovitellin-phosvitin complex, superhelical domain	Cytoplasm	CS pos: 17-18. TRA-VP. Pr: 0.8563
Isoform0000030	pos:3248-6187	--	0	0	0.0471719	0	0	0	0	0	0	down	GO:0006996 organelle organization	--	--	R: General function prediction only	K03255	--	IPR019734: Tetratricopeptide repeat;IPR027523: CLU domain containing protein;IPR011990: Tetratricopeptide-like helical domain superfamily	Nucleus	--
Isoform0000074	pos:93-344	--	0.201635	0.246123	0.242662	0.355404	0.37523	0.373672	1.59947	0.013119	0.104137	up	--	--	--	--	--	--	--	Nucleus	--
Isoform0000134	pos:605-5356	--	0	3.9676	0	0	0	0	0	0	0	down	GO:0006468 protein phosphorylation;GO:0006952 defense response;GO:0051707 response to other organism	GO:0016021 integral component of membrane	GO:0004672 protein kinase activity;GO:0005524 ATP binding;GO:0043531 ADP binding	T: Signal transduction mechanisms	K13415	ko04075: Plant hormone signal transduction	IPR036388: Winged helix-like DNA-binding domain superfamily;IPR002182: NB-ARC;IPR000719: Protein kinase domain;IPR042197: Apoptotic protease-activating factors, helical domain;IPR017441: Protein kinase, ATP binding site;IPR027417: P-loop containing nucleoside triphosphate hydrolase;IPR032675: Leucine-rich repeat domain superfamily;IPR011009: Protein kinase-like domain superfamily;IPR008271: Serin…	Nucleus	--
Isoform0000226	pos:388-4017	--	0.243445	0.284897	0.267472	0.158393	0.193266	0.162515	0.646099	0.00620667	0.0783451	down	GO:0006952 defense response;GO:0051707 response to other organism	--	GO:0043531 ADP binding	T: Signal transduction mechanisms	K13457	ko04626: Plant-pathogen interaction	IPR027417: P-loop containing nucleoside triphosphate hydrolase;IPR003591: Leucine-rich repeat, typical subtype;IPR032675: Leucine-rich repeat domain superfamily;IPR038005: Virus X resistance protein-like, coiled-coil domain;IPR002182: NB-ARC;IPR041118: Rx, N-terminal;IPR044974: Disease resistance protein, plants;IPR042197: Apoptotic protease-activating factors, helical domain	chloroplast	--
Isoform0000405	pos:3-4694	--	0.204478	0.247501	0.231384	0.142408	0.118066	0.178562	0.642465	0.0450873	0.184693	down	GO:0006397 mRNA processing	--	GO:0003676 nucleic acid binding;GO:0004386 helicase activity;GO:0005524 ATP binding;GO:0016787 hydrolase activity	A: RNA processing and modification	K12854	ko03040: Spliceosome	IPR001650: Helicase, C-terminal;IPR011545: DEAD/DEAH box helicase domain;IPR027417: P-loop containing nucleoside triphosphate hydrolase;IPR036388: Winged helix-like DNA-binding domain superfamily;IPR014001: Helicase superfamily 1/2, ATP-binding domain;IPR036390: Winged helix DNA-binding domain superfamily;IPR014756: Immunoglobulin E-set;IPR035892: C2 domain superfamily;IPR004179: Sec63 domain	Cytoplasm	--
Isoform0000445	pos:320-4504	--	0	0	0	0	0.0660304	0	inf	0	0	up	GO:0006468 protein phosphorylation;GO:0006952 defense response;GO:0051707 response to other organism	GO:0016021 integral component of membrane	GO:0004672 protein kinase activity;GO:0005524 ATP binding;GO:0043531 ADP binding	T: Signal transduction mechanisms	K13457	ko04626: Plant-pathogen interaction	IPR032675: Leucine-rich repeat domain superfamily;IPR000719: Protein kinase domain;IPR041118: Rx, N-terminal;IPR027417: P-loop containing nucleoside triphosphate hydrolase;IPR008271: Serine/threonine-protein kinase, active site;IPR017441: Protein kinase, ATP binding site;IPR002182: NB-ARC;IPR042197: Apoptotic protease-activating factors, helical domain;IPR036388: Winged helix-like DNA-binding dom…	chloroplast	--
Isoform0000450	pos:110-3382	--	0.190325	0.215787	0.218427	0.135211	0.125983	0.116522	0.604791	0.0012226	0.0397459	down	GO:0006085 acetyl-CoA biosynthetic process;GO:0006101 citrate metabolic process;GO:0006629 lipid metabolic process	GO:0005829 cytosol	GO:0003878 ATP citrate synthase activity;GO:0005524 ATP binding;GO:0046872 metal ion binding	C: Energy production and conversion	K01648	ko00020: Citrate cycle (TCA cycle);ko01100: Metabolic pathways;ko01110: Biosynthesis of secondary metabolites	IPR016102: Succinyl-CoA synthetase-like;IPR036291: NAD(P)-binding domain superfamily;IPR002020: Citrate synthase;IPR013650: ATP-grasp fold, succinyl-CoA synthetase-type;IPR036969: Citrate synthase superfamily;IPR016142: Citrate synthase-like, large alpha subdomain;IPR005811: ATP-citrate lyase/succinyl-CoA ligase;IPR017866: Succinyl-CoA synthetase, beta subunit, conserved site;IPR003781: CoA-bindi…	Cytoplasm	--
Isoform0000522	pos:44-4255	--	0.0378027	0	0	0	0	0	0	0	0	down	--	GO:0016021 integral component of membrane	GO:0005524 ATP binding;GO:0140359 ABC-type transporter activity	Q: Secondary metabolites biosynthesis, transport and catabolism	K08711	ko02010: ABC transporters	IPR027417: P-loop containing nucleoside triphosphate hydrolase;IPR003439: ABC transporter-like, ATP-binding domain;IPR013581: Plant PDR ABC transporter associated;IPR034001: ATP-binding cassette transporter, PDR-like subfamily G, domain 1;IPR034003: ATP-binding cassette transporter, PDR-like subfamily G, domain 2;IPR029481: ABC-transporter, N-terminal domain;IPR043926: ABC transporter family G do…	Plasma membrane	--
Isoform0000523	pos:1-4443	--	0.807385	0.805945	0.805084	0.530964	0.501145	0.53335	0.647308	0.00208405	0.0516832	down	GO:0006996 organelle organization;GO:0051640 organelle localization	GO:0005737 cytoplasm	--	R: General function prediction only	K03255	--	IPR011990: Tetratricopeptide-like helical domain superfamily;IPR027523: CLU domain containing protein;IPR019734: Tetratricopeptide repeat;IPR025697: CLU domain;IPR033646: CLU central domain	Nucleus	--
Isoform0000557	pos:467-4057	--	0.053546	0.0299563	0.0323692	0.119043	0.0916833	0.0643361	2.37386	0.0271303	0.145966	up	GO:0016310 phosphorylation;GO:0046854 phosphatidylinositol phosphate biosynthetic process;GO:0048015 phosphatidylinositol-mediated signaling	--	GO:0016301 kinase activity	T: Signal transduction mechanisms;U: Intracellular trafficking, secretion, and vesicular transport	K19801	ko00562: Inositol phosphate metabolism;ko01100: Metabolic pathways;ko04070: Phosphatidylinositol signaling system	IPR036940: Phosphatidylinositol 3-/4-kinase, catalytic domain superfamily;IPR000403: Phosphatidylinositol 3-/4-kinase, catalytic domain;IPR011009: Protein kinase-like domain superfamily;IPR018936: Phosphatidylinositol 3/4-kinase, conserved site;IPR042236: Phosphoinositide 3-kinase, accessory (PIK) domain superfamily;IPR015433: Phosphatidylinositol kinase;IPR016024: Armadillo-type fold;IPR001263: …	Cytoplasm	--
Isoform0000753	pos:216-3251	--	0.0721258	0.0700963	0.0619901	0	0	0	0	0	0	down	--	GO:0110165 cellular anatomical entity	GO:0003779 actin binding	--	--	--	IPR011684: Protein Networked (NET), actin-binding (NAB) domain	Nucleus	--
Isoform0000776	pos:2885-3202	--	0	0	0	1.24017	1.03594	1.04987	inf	0	0	up	GO:0006457 protein folding	--	GO:0005524 ATP binding;GO:0016887 ATP hydrolysis activity;GO:0051082 unfolded protein binding	O: Posttranslational modification, protein turnover, chaperones	K04079	ko04141: Protein processing in endoplasmic reticulum;ko04626: Plant-pathogen interaction	IPR001404: Heat shock protein Hsp90 family;IPR003006: Immunoglobulin/major histocompatibility complex, conserved site;IPR036890: Histidine kinase/HSP90-like ATPase superfamily	chloroplast	--
Isoform0000803	pos:533-3637	--	0.093591	0.0787651	0.0736533	0.0507	0.0428437	0.0465827	0.569598	0.00445113	0.0680203	down	--	--	--	--	K22184	ko03082: ATP-dependent chromatin remodeling	IPR001487: Bromodomain;IPR036427: Bromodomain-like superfamily	Nucleus	--
Isoform0000994	pos:361-3642	--	0.794476	0.985264	1.00983	40.906	36.7289	36.1741	40.798	2.94503e-05	0.0101486	up	--	GO:0016021 integral component of membrane	GO:0005524 ATP binding;GO:0140359 ABC-type transporter activity	Q: Secondary metabolites biosynthesis, transport and catabolism	K05658	ko02010: ABC transporters	IPR011527: ABC transporter type 1, transmembrane domain;IPR027417: P-loop containing nucleoside triphosphate hydrolase;IPR003439: ABC transporter-like, ATP-binding domain;IPR036640: ABC transporter type 1, transmembrane domain superfamily	Plasma membrane	--
Isoform0001160	pos:2624-3829	--	0.0374936	0.0645506	0.0543647	0	0	0	0	0	0	down	GO:0006468 protein phosphorylation	GO:0016021 integral component of membrane	GO:0004672 protein kinase activity;GO:0005524 ATP binding	--	K20718	ko04016: MAPK signaling pathway - plant	IPR011009: Protein kinase-like domain superfamily;IPR008266: Tyrosine-protein kinase, active site;IPR000719: Protein kinase domain;IPR017441: Protein kinase, ATP binding site	chloroplast	--
Isoform0001812	pos:130-3135	--	0.684919	0.549429	0.621405	0.279118	0.42035	0.303316	0.540365	0.0211805	0.129526	down	GO:0007015 actin filament organization;GO:0051693 actin filament capping	GO:0005856 cytoskeleton	GO:0051015 actin filament binding	Z: Cytoskeleton	K05768	--	IPR003128: Villin headpiece;IPR007122: Villin/Gelsolin;IPR036886: Villin headpiece domain superfamily;IPR007123: Gelsolin-like domain;IPR036180: Gelsolin-like domain superfamily;IPR029006: ADF-H/Gelsolin-like domain superfamily	chloroplast	--
Isoform0002083	pos:584-3514	--	0	0	0	0.478013	0.348031	0.401981	inf	0	0	up	GO:0006511 ubiquitin-dependent protein catabolic process;GO:0016579 protein deubiquitination	GO:0016021 integral component of membrane	GO:0004843 cysteine-type deubiquitinase activity;GO:0046872 metal ion binding	O: Posttranslational modification, protein turnover, chaperones	K11855	--	IPR038765: Papain-like cysteine peptidase superfamily;IPR028889: Ubiquitin specific protease domain;IPR018200: Ubiquitin specific protease, conserved site;IPR002893: Zinc finger, MYND-type;IPR001394: Peptidase C19, ubiquitin carboxyl-terminal hydrolase	Extracell	--
Isoform0002103	pos:50-3496	--	0.192858	0.195831	0.274901	0.127492	0.155469	0.125659	0.615773	0.0337488	0.160966	down	--	--	GO:0003676 nucleic acid binding;GO:0005524 ATP binding	A: RNA processing and modification	K26077	--	IPR027417: P-loop containing nucleoside triphosphate hydrolase;IPR014001: Helicase superfamily 1/2, ATP-binding domain;IPR012961: ATP-dependent RNA helicase Ski2, C-terminal;IPR001650: Helicase, C-terminal;IPR011545: DEAD/DEAH box helicase domain	chloroplast	--
Isoform0002128	pos:511-3108	--	0.7825	0.45573	0.546544	1.04195	1.24205	1.01996	1.85119	0.0424464	0.18014	up	GO:0006952 defense response;GO:0051707 response to other organism	--	GO:0043531 ADP binding	T: Signal transduction mechanisms	K13457	ko04626: Plant-pathogen interaction	IPR027417: P-loop containing nucleoside triphosphate hydrolase;IPR041118: Rx, N-terminal;IPR036388: Winged helix-like DNA-binding domain superfamily;IPR032675: Leucine-rich repeat domain superfamily;IPR044974: Disease resistance protein, plants;IPR038005: Virus X resistance protein-like, coiled-coil domain;IPR002182: NB-ARC;IPR042197: Apoptotic protease-activating factors, helical domain	chloroplast	--
Isoform0002217	pos:572-1081	--	0	0	0	0	0.0338683	0.0487351	inf	0	0	up	--	--	--	--	--	--	--	Cytoplasm	--
Isoform0002293	pos:1986-3317	--	0.604081	0.549082	0.495002	0.141613	0.211754	0.236744	0.358041	0.0131456	0.104137	down	--	GO:0016021 integral component of membrane	GO:0022857 transmembrane transporter activity	R: General function prediction only	--	--	IPR036259: MFS transporter superfamily	chloroplast	--
Isoform0002304	pos:1497-2270	--	0.15818	0.143179	0.181982	0.253265	0.252417	0.233834	1.53001	0.015845	0.115636	up	GO:0006422 aspartyl-tRNA aminoacylation	GO:0005737 cytoplasm	GO:0003676 nucleic acid binding;GO:0004815 aspartate-tRNA ligase activity;GO:0005524 ATP binding	J: Translation, ribosomal structure and biogenesis	K22503	ko00970: Aminoacyl-tRNA biosynthesis	IPR045864: Class II Aminoacyl-tRNA synthetase/Biotinyl protein ligase (BPL) and lipoyl protein ligase (LPL);IPR012340: Nucleic acid-binding, OB-fold;IPR004364: Aminoacyl-tRNA synthetase, class II (D/K/N);IPR002312: Aspartyl/Asparaginyl-tRNA synthetase, class IIb;IPR004523: Aspartate-tRNA synthetase, type 2	Cytoplasm	--
Isoform0002387	pos:1-2103	--	0.374326	0.342873	0.30094	0.18056	0.239945	0.256545	0.664989	0.0401763	0.175841	down	--	--	--	--	--	--	IPR032675: Leucine-rich repeat domain superfamily	Nucleus	--
Isoform0002674	pos:187-3006	--	0.375461	0.368007	0.333136	0.16024	0.176643	0.232572	0.528936	0.0198782	0.125833	down	GO:0006952 defense response;GO:0051707 response to other organism	--	GO:0043531 ADP binding	T: Signal transduction mechanisms	K13457	ko04626: Plant-pathogen interaction	IPR041118: Rx, N-terminal;IPR032675: Leucine-rich repeat domain superfamily;IPR002182: NB-ARC;IPR027417: P-loop containing nucleoside triphosphate hydrolase;IPR038005: Virus X resistance protein-like, coiled-coil domain	chloroplast	--
Isoform0002704	pos:1497-3212	--	0.289125	0.426663	0.396438	0.683263	0.601443	0.706099	1.78993	0.0251049	0.140555	up	GO:0006952 defense response;GO:0051707 response to other organism	--	GO:0043531 ADP binding	T: Signal transduction mechanisms	K13457	ko04626: Plant-pathogen interaction	IPR036388: Winged helix-like DNA-binding domain superfamily;IPR032675: Leucine-rich repeat domain superfamily;IPR044974: Disease resistance protein, plants	Nucleus	--
Isoform0002797	pos:222-2579	--	0.039264	0	0	0	0	0	0	0	0	down	--	--	--	R: General function prediction only	--	--	IPR011990: Tetratricopeptide-like helical domain superfamily;IPR002885: Pentatricopeptide repeat;IPR033443: Pentacotripeptide-repeat region of PRORP	chloroplast	--
Isoform0002868	pos:166-2886	--	0.139525	0.159361	0.108719	0.297775	0.196808	0.202004	1.70898	0.040249	0.175991	up	GO:0019438 aromatic compound biosynthetic process;GO:0032259 methylation	--	GO:0008171 O-methyltransferase activity;GO:0008757 S-adenosylmethionine-dependent methyltransferase activity	B: Chromatin structure and dynamics	K20792	--	IPR019734: Tetratricopeptide repeat;IPR021183: N-terminal acetyltransferase A, auxiliary subunit;IPR011990: Tetratricopeptide-like helical domain superfamily	Cytoplasm	--
Isoform0003140	pos:108-3326	--	0	0.111491	0	0	0	0	0	0	0	down	GO:0009833 plant-type primary cell wall biogenesis;GO:0030244 cellulose biosynthetic process;GO:0071555 cell wall organization	GO:0005886 plasma membrane;GO:0016021 integral component of membrane	GO:0016759 cellulose synthase activity;GO:0016760 cellulose synthase (UDP-forming) activity;GO:0046872 metal ion binding	--	K10999	--	IPR027934: Cellulose synthase, RING-type zinc finger;IPR029044: Nucleotide-diphospho-sugar transferases;IPR013083: Zinc finger, RING/FYVE/PHD-type;IPR005150: Cellulose synthase	Plasma membrane	--
Isoform0003177	pos:387-3215	--	0.263718	0.188597	0.217355	0.36393	0.274705	0.400326	1.55145	0.0441313	0.183335	up	--	--	--	--	--	--	IPR040265: Protein CHUP1-like	chloroplast	CS pos: 17-18. AFT-LK. Pr: 0.1448
Isoform0003371	pos:1-1560	--	0.0577168	0	0	0	0	0	0	0	0	down	--	GO:0016021 integral component of membrane	GO:0003993 acid phosphatase activity;GO:0046872 metal ion binding	G: Carbohydrate transport and metabolism	K22390	--	IPR041792: Purple acid phosphatase, metallophosphatase domain;IPR025733: Iron/zinc purple acid phosphatase-like C-terminal domain;IPR029052: Metallo-dependent phosphatase-like;IPR008963: Purple acid phosphatase-like, N-terminal;IPR015914: Purple acid phosphatase, N-terminal;IPR039331: Purple acid phosphatase-like;IPR004843: Calcineurin-like phosphoesterase domain, ApaH type;IPR003961: Fibronectin…	chloroplast	--
Isoform0003388	pos:67-3237	--	0.543179	0.529276	0.570103	0.347226	0.306109	0.331432	0.599532	0.000846911	0.035299	down	GO:0030244 cellulose biosynthetic process;GO:0071555 cell wall organization;GO:0071669 plant-type cell wall organization or biogenesis	GO:0005886 plasma membrane;GO:0016021 integral component of membrane	GO:0016760 cellulose synthase (UDP-forming) activity;GO:0046872 metal ion binding	--	K10999	--	IPR029044: Nucleotide-diphospho-sugar transferases;IPR001841: Zinc finger, RING-type;IPR013083: Zinc finger, RING/FYVE/PHD-type;IPR027934: Cellulose synthase, RING-type zinc finger;IPR005150: Cellulose synthase	Plasma membrane	--
Isoform0003420	pos:85-3222	--	0.881012	0.893119	0.782509	0.529409	0.532673	0.553519	0.631923	0.00452646	0.0681693	down	GO:0009833 plant-type primary cell wall biogenesis;GO:0030244 cellulose biosynthetic process;GO:0071555 cell wall organization	GO:0005886 plasma membrane;GO:0016021 integral component of membrane	GO:0016759 cellulose synthase activity;GO:0016760 cellulose synthase (UDP-forming) activity;GO:0046872 metal ion binding	--	K10999	--	IPR013083: Zinc finger, RING/FYVE/PHD-type;IPR029044: Nucleotide-diphospho-sugar transferases;IPR005150: Cellulose synthase;IPR027934: Cellulose synthase, RING-type zinc finger	Plasma membrane	--
[truncated: 373 more rows]
