# Supplementary material for: Integrated transcriptomic, proteomic and metabolomic analyses revealing the roles of amino acid and sucrose metabolism in augmenting drought tolerance in Agropyron mongolicum
Source: Front Plant Sci. 2024 Dec 16;15:1515944. doi: 10.3389/fpls.2024.1515944 (PMC11685866; doi:10.3389/fpls.2024.1515944)
Supplement: Supplementary file 9 [file Table8.xlsx]

## Sheet: Sheet1
Index	Compounds	物质	Class I	物质一级分类	Class II	物质二级分类	Formula	Level	CAS	shoot-D-24h-1	shoot-D-24h-2	shoot-D-24h-3	shoot-CK-1	shoot-CK-2	shoot-CK-3	VIP	P-value	FDR	Fold_Change	Log2FC	Type
Zmmp002946	(3-(carboxyamino)-2-methylpropanoyl)phenylalanine	(3-(羧氨基)-2-甲基丙酰基)苯丙氨酸	Amino acids and derivatives	氨基酸及其衍生物	Amino acids and derivatives	氨基酸及其衍生物	C14H18N2O5	1	-	9.74661e+06	1.35607e+07	1.21178e+07	1.01977e+06	1.23971e+06	1.28914e+06	1.38569	0.0104505	0.0521002	9.98282	3.31945	up
MWSHC2025	1,2,3,4-Tetrahydro-3-carboxy-2-carboline	1,2,3,4-四氢-3-羧基-2-咔啉	Alkaloids	生物碱	Alkaloids	生物碱	C12H12N2O2	3	72002-54-1	786060	684342	639241	178464	143038	174076	1.38196	0.00427938	0.0316674	4.25693	2.08981	up
Wbjp002330	1,3-dihydroxy-2,3,3a,4-tetrahydropyrrolo[2,1-b]quinazolin-9(1H)-one	1,3-二羟基-2,3,3a,4-四氢吡咯并[2,1-b]喹唑啉-9(1H)-酮	Alkaloids	生物碱	Alkaloids	生物碱	C11H12N2O3	2	-	261504	251752	289602	75432.2	77638.9	66511.6	1.38647	0.00174709	0.0194661	3.65629	1.87038	up
Waln010449	1-(2,3-dihydroxypropoxy)-3-(((2-(dimethylamino)ethoxy)(hydroxy)phosphoryl)oxy)propan-2-yl (E)-hexadec-9-enoate	1-(2,3-二羟基丙氧基)-3-(((2-(二甲基氨基)乙氧基)(羟基)磷酰基)氧基)丙-2-基 (E)-9-十六碳烯酸	Lipids	脂质	LPE	溶血磷脂酰乙醇胺	C26H52NO9P	1	-	93638.3	158361	137297	359372	297924	289928	1.30384	0.00326961	0.0276138	0.410986	-1.28284	down
Waln011704	1-(2,3-dihydroxypropoxy)-3-(((2-(dimethylamino)ethoxy)(hydroxy)phosphoryl)oxy)propan-2-yl (Z)-14-Octadecenoic Acid	1-(2,3-二羟基丙氧基)-3-(((2-(二甲基氨基)乙氧基)(羟基)磷酰基)氧基)丙-2-基 (Z)-14-十八碳烯酸	Lipids	脂质	LPE	溶血磷脂酰乙醇胺	C28H56NO9P	1	-	210561	247542	328650	563446	565412	489124	1.30388	0.0041154	0.0308916	0.486256	-1.04021	down
WaYn011606	1-(2,3-dihydroxypropoxy)-3-(((2-(dimethylamino)ethoxy)(hydroxy)phosphoryl)oxy)propan-2-yl heptadecanoate	1-(2,3-二羟基丙氧基)-3-(((2-(二甲基氨基)乙氧基)(羟基)磷酰基)氧基)丙-2-基十七烷酸酯	Lipids	脂质	LPE	溶血磷脂酰乙醇胺	C27H56NO9P	1	-	28048.8	25404.5	19173.8	2538.72	2538.72	2538.72	1.38604	0.0144201	0.0622859	9.53595	3.25338	up
Waln011524	1-(2,3-dihydroxypropoxy)-3-(((2-(dimethylamino)ethoxy)(hydroxy)phosphoryl)oxy)propan-2-yl palmitate*	1-(2,3-二羟基丙氧基)-3-(((2-(二甲基氨基)乙氧基)(羟基)磷酰基)氧基)丙-2-基 棕榈酸酯*	Lipids	脂质	LPE	溶血磷脂酰乙醇胺	C26H54NO9P	1	-	6.26177e+06	6.32516e+06	6.43507e+06	1.7598e+06	1.68202e+06	1.8398e+06	1.39204	3.35832e-07	0.000154064	3.60154	1.84861	up
Lmxp010913	1-(9Z-Octadecenoyl)-2-(9-oxo-nonanoyl)-sn-glycero-3-phosphocholine	1-(9Z-十八烯酰基)-2-(9-氧-壬酰基)-sn-甘油-3-磷酸胆碱	Lipids	脂质	Glycerol ester	甘油酯	C35H66NO9P	3	-	44378.6	41337.7	14042.3	79860	98526.6	48488.2	1.00987	0.0824909	0.192403	0.439707	-1.18538	down
MW0058181	1-(9Z-heptadecenoyl)-sn-glycero-3-phosphoethanolamine	PE(17:1(9Z)/0:0)	Lipids	脂质	Glycerol ester	甘油酯	C22H44NO7P	3	-	3627.39	3627.39	3627.39	37188.2	43059.8	31306.6	1.38897	0.0100682	0.051233	0.0975501	-3.35771	down
pmp001187	1-(Dihydroxyphenyl)-N2,N3-bis(4-hydroxyphenethyl)-(5-8)-dimethoxy-1,2dihydronaphthalene-2,3-dicarboxamide	1-(二羟基苯基)-N 2,N 3-双(4-羟基苯乙基)-(5-8)-二甲氧基-1,2-二氢萘-2,3-二甲酰胺	Alkaloids	生物碱	Phenolamine	酚胺	C36H36N2O8	3	-	552.913	552.913	552.913	3829.87	5386.63	4344.17	1.38696	0.0130631	0.0584856	0.12232	-3.03127	down
Zbfn007626	1-Linoleoyl-2-Lysophosphatidic Acid Monobutylamine Ester	1-亚油酰-2-溶血磷脂酸单丁胺酯	Others	其它类	Others	其它	C25H48NO7P	3	-	4.02966e+06	4.1207e+06	4.50574e+06	9.09558e+06	7.37149e+06	9.02971e+06	1.3603	0.0126435	0.0573934	0.49638	-1.01048	down
Saln004708	1-O-Glucopyranosylamplexine	1-O-Glucopyranosylamplexine	Terpenoids	萜类	Monoterpenoids	倍萜	C16H26O9	3	-	420237	380008	426111	839099	902121	794381	1.37962	0.00142676	0.0170137	0.483655	-1.04795	down
Lmhp011562	1-α-Linolenoyl-glycerol*	1-α-亚麻酸甘油酯*	Lipids	脂质	Glycerol ester	甘油酯	C21H36O4	1	-	3.02271e+06	2.90569e+06	2.71069e+06	1.06892e+06	958239	1.66939e+06	1.29707	0.00910937	0.0486743	2.33707	1.2247	up
pmb2804	13S-Hydroperoxy-9Z,11E-octadecadienoic acid	13-氢过氧化-9,11-十八碳二烯酸	Lipids	脂质	Free fatty acids	游离脂肪酸	C18H32O4	3	33964-75-9	39183.7	39123	43080.4	2708.33	28191.6	2708.33	1.08029	0.0716908	0.176172	3.61183	1.85273	up
Walp007738	14-Amino-15-hydroxy-11-methylpentadecanoic acid	14-氨基-15-羟基-11-甲基十五烷酸	Lipids	脂质	Sphingolipids	鞘脂	C16H33NO3	3	-	4166.45	8230.87	6506.08	13000.1	20525.9	23559.4	1.25397	0.0423233	0.127099	0.331143	-1.59448	down
Qmmp111802	15-Hydroxy-abieta-8,11,13-trien-3-one	15-Hydroxy-abieta-8,11,13-trien-3-one	Terpenoids	萜类	Ditepenoids	二萜	C20H28O2	3	-	7537.32	5178.59	5048.12	15997.4	8409.62	13243.8	1.17963	0.0822276	0.192403	0.47181	-1.08372	down
MWS20169	2,5-dihydroxy-1-methoxy-anthraquinone	2,5-二羟基-1-甲氧基蒽醌	Quinones	醌类	Anthraquinone	蒽醌	C15H10O5	3	-	395638	424627	433815	107276	92140.7	107491	1.3886	0.000248029	0.00666404	4.08618	2.03075	up
Lmdp002901	2,6-Dihydroxy-4-isopropylphenyl-1-O-β-D-glucoside	2,6-二羟基-4-异丙基苯-1-O-β-D-葡萄糖苷	Others	其它类	Others	其它	C15H22O8	3	-	3550.01	3550.01	3550.01	37650	17750.1	41419.5	1.35128	0.0595697	0.15915	0.109999	-3.18444	down
Lmbn005172	2,6-Dimethoxybenzaldehyde	2,6-二甲氧基苯甲醛	Others	其它类	Aldehyde compounds	醛类化合物	C9H10O3	3	3392-97-0	165933	173032	154189	64169.6	98283.9	67342.9	1.31243	0.00578624	0.0376477	2.14605	1.10168	up
WaYn010475	2-(2,3-dihydroxypropoxy)-3-(((2-(dimethylamino)ethoxy)(hydroxy)phosphoryl)oxy)propan-2-yl (E)-hexadec-9-enoate	2-(2,3-二羟基丙氧基)-3-(((2-(二甲基氨基)乙氧基)(羟基)磷酰基)氧基)丙-2-基 (E)-9-十六碳烯酸	Lipids	脂质	LPE	溶血磷脂酰乙醇胺	C26H52NO9P	2	-	101420	124556	87696.7	43521.3	48866.2	51406.7	1.33731	0.0295762	0.100344	2.1814	1.12526	up
WaYn011395	2-(2,3-dihydroxypropoxy)-3-(((2-(dimethylamino)ethoxy)(hydroxy)phosphoryl)oxy)propan-2-yl (Z)-14-Octadecenoic Acid	2-(2,3-二羟基丙氧基)-3-(((2-(二甲基氨基)乙氧基)(羟基)磷酰基)氧基)丙-2-基 (Z)-14-十八碳烯酸	Lipids	脂质	LPE	溶血磷脂酰乙醇胺	C28H56NO9P	1	-	1.12227e+06	1.16305e+06	1.18322e+06	3.97538e+06	3.87765e+06	3.9467e+06	1.39263	1.28644e-06	0.000257315	0.293951	-1.76635	down
Waln011222	2-(2,3-dihydroxypropoxy)-3-(((2-(dimethylamino)ethoxy)(hydroxy)phosphoryl)oxy)propyl palmitate*	2-(2,3-二羟基丙氧基)-3-(((2-(二甲基氨基)乙氧基)(羟基)磷酰基)氧基) 棕榈酸丙酯*	Lipids	脂质	LPE	溶血磷脂酰乙醇胺	C26H54NO9P	1	-	6.3704e+06	6.51208e+06	6.27259e+06	1.74865e+06	1.74434e+06	1.82592e+06	1.39269	3.77451e-05	0.0023658	3.60132	1.84853	up
MWStz152	2-(Acetylamino)-3-phenyl-2-propenoic acid*	α-乙酰氨基肉桂酸*	Alkaloids	生物碱	Alkaloids	生物碱	C11H11NO3	2	5469-45-4	267594	160015	185143	75882.5	74345.7	82969.1	1.32196	0.0591626	0.158494	2.62761	1.39375	up
NK10253223	2-Amino-3-methoxybenzoic acid	2-氨基-3-甲氧基苯甲酸	Phenolic acids	酚酸类	Phenolic acids	酚酸类	C8H9NO3	3	3177-80-8	227678	187836	235776	444602	480325	485371	1.36741	0.000234221	0.00661122	0.46181	-1.11463	down
Walp007182	2-Aminohexadecane-1,15-diol	2-氨基十六烷-1,15-二醇	Lipids	脂质	Sphingolipids	鞘脂	C16H35NO2	2	-	794690	561358	695012	1.87908e+06	1.91049e+06	2.20752e+06	1.3635	0.000992445	0.0137897	0.34201	-1.54789	down
WaYp007721	2-Aminohexadecane-1,16,16-triol	2-氨基十六烷-1,16,16-三醇	Lipids	脂质	Sphingolipids	鞘脂	C16H35NO3	2	-	39477.9	34143	48783.5	81402	84225.6	124463	1.29283	0.0465274	0.134771	0.421952	-1.24485	down
Walp007043	2-Aminohexadecane-1,4-diol	2-氨基十六烷-1,4-二醇	Lipids	脂质	Sphingolipids	鞘脂	C16H35NO2	2	-	712791	741188	574644	2.05335e+06	1.88474e+06	1.95747e+06	1.37683	5.49759e-05	0.0029413	0.344093	-1.53913	down
Lssp210131	2-Deacetyldecinna moyltaxinine E	2-去乙酰去桂皮酰紫杉素E	Others	其它类	Others	其它	C26H38O8	3	-	6035.52	6035.52	6035.52	74035.5	30177.6	49911.9	1.35151	0.0701084	0.174029	0.11748	-3.08952	down
Zmjn003398	2-Dodecenedioic acid	2-十二烯二酸	Lipids	脂质	Free fatty acids	游离脂肪酸	C12H20O4	2	6402-36-4	1.60929e+06	1.49212e+06	1.62217e+06	576811	538947	562524	1.39032	0.00088087	0.0130977	2.81453	1.49289	up
MWSslk073	2-Ethylhexyl 4-methoxycinnamate	甲氧基肉桂酸乙基己基酯	Phenolic acids	酚酸类	Phenolic acids	酚酸类	C18H26O3	3	5466-77-3	1212.13	1212.13	1212.13	7753.82	6526.12	517113	1.03739	0.409461	0.562292	0.00684314	-7.19113	down
Lmyp002284	2-Hydroxy-1,4-benzoxazine-3(2H)-one glucoside (HBOA glucoside)	2-羟基-1,4-苯并噁嗪-3(2H)-酮 葡萄糖苷 (HBOA 葡萄糖苷)	Alkaloids	生物碱	Alkaloids	生物碱	C14H17NO8	3	27625-86-1	544257	598355	485470	163365	145265	131685	1.38099	0.00414304	0.0308916	3.69754	1.88656	up
Lmrn001951	2-Hydroxy-3-(4-Hydroxyphenyl)Propanoic Acid	2-羟基-(4-羟基苯基)丙酸	Phenolic acids	酚酸类	Phenolic acids	酚酸类	C9H10O4	3	23508-35-2	83346.8	76097.3	83592.5	2993.99	2993.99	2993.99	1.39295	0.000991492	0.0137897	27.0582	4.758	up
mws0206	2-Hydroxybutyric Acid*	2-羟基丁酸*	Organic acids	有机酸	Organic acids	有机酸	C4H8O3	3	3347-90-8	55759.1	34865.3	54139.7	4615.34	4615.34	4615.34	1.38136	0.0228422	0.0846757	10.4553	3.38616	up
Zmyn000247	2-Hydroxyglutaric Acid*	2-羟基戊二酸*	Organic acids	有机酸	Organic acids	有机酸	C5H8O5	3	13095-48-2	195217	236454	217692	78464.6	78183.4	57524.1	1.36339	0.00134548	0.0164378	3.03197	1.60025	up
Lmmn003323	2-Hydroxyhexadecanoic acid*	2-羟基十六烷酸*	Lipids	脂质	Free fatty acids	游离脂肪酸	C16H32O3	1	764-67-0	1.46452e+06	1.41439e+06	1.50613e+06	691768	612992	692411	1.38454	2.88173e-05	0.00188369	2.19563	1.13463	up
mws0574	2-Hydroxyisobutyric acid*	2-羟基异丁酸*	Organic acids	有机酸	Organic acids	有机酸	C4H8O3	3	594-61-6	60047.4	55494	47888.1	5435.37	5435.37	5435.37	1.39087	0.00518982	0.0349734	10.0226	3.32518	up
mws0341	2-Hydroxyisocaproic acid	2-羟基异己酸	Organic acids	有机酸	Organic acids	有机酸	C6H12O3	2	20312-37-2	292896	208764	278035	95164.4	94495.9	84535.1	1.36138	0.0213143	0.0820131	2.84357	1.50771	up
Zmyn002323	2-Hydroxyphenylacetic acid	2-羟基苯乙酸	Organic acids	有机酸	Organic acids	有机酸	C8H8O3	3	614-75-5	114245	78451.7	116545	20278.1	28995.2	16891.8	1.34685	0.0162394	0.0673264	4.67379	2.22459	up
pmb3101	2-Isopropylmalic Acid	2-异丙基苹果酸	Organic acids	有机酸	Organic acids	有机酸	C7H12O5	1	49601-06-1	879542	691638	1.45599e+06	5.4675e+06	4.38653e+06	4.10756e+06	1.33457	0.00396409	0.0304524	0.216821	-2.20542	down
Lmhp010334	2-Linoleoylglycerol-1-O-glucoside	2-亚油酰甘油酯-1-O-葡萄糖苷	Lipids	脂质	Glycerol ester	甘油酯	C27H48O9	1	-	14282.7	11735.2	20353.4	30340.2	46259.2	38313.5	1.27545	0.0206319	0.0803633	0.403534	-1.30924	down
mws0473	2-Methylsuccinic acid*	2-甲基丁二酸*	Organic acids	有机酸	Organic acids	有机酸	C5H8O4	3	498-21-5	1.21539e+06	1.21216e+06	1.5149e+06	393895	314098	297272	1.3743	0.00654028	0.040459	3.9218	1.97152	up
Lmyp003387	2-Oxo-3,4-dihydro-1H-quinoline-3-carboxylic acid	2-氧-3,4-二氢-1H-喹啉-3-羧酸	Alkaloids	生物碱	Quinoline alkaloids	喹啉类生物碱	C10H9NO3	3	246867-17-4	158381	253164	253977	112687	84938.8	86558.8	1.2782	0.0480838	0.137116	2.34187	1.22766	up
Lmgp000659	2-Phenylacetamide*	2-苯乙酰胺*	Alkaloids	生物碱	Alkaloids	生物碱	C8H9NO	3	103-81-1	5.73963e+06	4.95149e+06	5.91142e+06	2.05934e+06	2.47376e+06	2.45776e+06	1.36926	0.00293002	0.0257587	2.37489	1.24786	up
mws2124	2-Phosphoglycolate	2-磷酸乙醇酸	Organic acids	有机酸	Organic acids	有机酸	C2H5O6P	3	13147-57-4	4792	4792	4792	63403.9	58486.8	62407.1	1.39293	0.000701293	0.0118368	0.0780041	-3.68031	down
Zmgn001448	2-Propylmalic Acid*	2-丙基苹果酸*	Organic acids	有机酸	Organic acids	有机酸	C7H12O5	1	-	717625	913063	751568	4.18193e+06	4.54085e+06	2.98894e+06	1.36977	0.0205738	0.0803633	0.203408	-2.29755	down
Walp009431	2-aminotetracoSane-1,5,21,23-tetraol*	2-氨基二十四烷-1,5,21,23-四醇*	Lipids	脂质	Sphingolipids	鞘脂	C24H51NO4	3	-	6191.6	8516.76	9065.11	1238.32	1238.32	1238.32	1.38202	0.0169144	0.0692714	6.39939	2.67793	up
Wcdp001953	2-methyl-1-nitronaphthalene	2-甲基-二硝基萘酚	Others	其它类	Others	其它	C11H9NO2	1	881-03-8	5.25365e+07	4.86163e+07	5.02863e+07	1.46967e+07	1.23526e+07	1.32796e+07	1.38836	5.19105e-05	0.00290847	3.75511	1.90885	up
Lmhp011388	2-α-Linolenoyl-glycerol*	2-α-亚麻酸甘油酯*	Lipids	脂质	Glycerol ester	甘油酯	C21H36O4	1	55268-58-1	1.06698e+06	1.13975e+06	1.16585e+06	528628	513962	532282	1.38937	0.00180432	0.0199903	2.14149	1.09862	up
Zajp007311	3',4',5',5,7-Pentamethoxyflavone	3',4',5',5,7-五甲氧基黄酮	Flavonoids	黄酮	Flavones	黄酮	C20H20O7	3	53350-26-8	36769.4	36704.9	32909.8	122404	39743.3	118722	1.05068	0.1634	0.304879	0.378767	-1.40062	down
ZbYn009262	3'-linoleoyl sucrose	3'-亚油酰蔗糖	Others	其它类	Others	其它	C30H50O12	2	-	144315	139071	154560	5519.96	5519.96	5519.96	1.39295	0.00104689	0.0141582	26.4463	4.72499	up
Zmyn003613	3,4,5,6-tetrahydroxytetrahydro-2H-pyran-2-yl)methyl (E)-3-(4-hydroxy-3,5-dimethoxyphenyl)acrylate	3,4,5,6-tetrahydroxytetrahydro-2H-pyran-2-yl)methyl (E)-3-(4-hydroxy-3,5-dimethoxyphenyl)acrylate	Phenolic acids	酚酸类	Phenolic acids	酚酸类	C17H22O10	3	-	352806	368402	349782	642056	1.06851e+06	1.16304e+06	1.29757	0.064154	0.165172	0.372699	-1.42392	down
Zbfn003643	3,4,5-Trimethoxyphenol-β-D-apiofuranosyl-(1→6)-O-β-D-glucopyranoside	3,4,5-三甲氧基苯酚-β-D-芹糖基-(1→6)-O-β-D-葡萄糖苷	Others	其它类	Others	其它	C20H30O13	1	-	83782.9	82992.1	57168.6	18653.9	30339.1	6812.82	1.19792	0.00837915	0.0467305	4.01291	2.00465	up
Lahp003986	3,4-Dihydro-4-(4'-hydroxyphenyl)-5,7-dihydroxycoumarin glucoside	3,4-二氢-4-(4'-羟基苯基)-5,7-二羟基香豆素 葡萄糖苷	Lignans and Coumarins	木脂素和香豆素	Coumarins	香豆素	C21H22O10	3	-	5899.54	5899.54	5899.54	74830.2	87550.4	54754.7	1.38492	0.0200042	0.0787715	0.0815096	-3.61689	down
pme2598	3,4-Dihydroxybenzeneacetic acid*	3,4-二羟基苯乙酸*	Phenolic acids	酚酸类	Phenolic acids	酚酸类	C8H8O4	3	102-32-9	269545	222046	445551	158575	126474	109549	1.21417	0.111275	0.23597	2.37493	1.24788	up
Zahp007439	3,4-Methylenedioxycinnamaldehyde	3,4-亚甲基二氧肉桂醛	Others	其它类	Aldehyde compounds	醛类化合物	C10H8O3	3	58095-77-5	339652	263852	261471	808721	974111	1.00682e+06	1.36957	0.00371471	0.0291382	0.310065	-1.68936	down
Zmfn007881	3,4-dihydroxy-2,7-dimethoxyphenanthrene	3,4-二羟基-2,7-二甲氧基菲	Quinones	醌类	PhenAnthraquinones	菲醌	C16H14O4	3	-	45928.2	42179.8	36028.2	7481.41	8486.48	5657.65	1.37572	0.00431654	0.0317031	5.74026	2.52112	up
mws0914	3,5,7-Trihydroxyflavanone (Pinobanksin)*	3,5,7-三羟基黄烷酮 (短叶松素)*	Flavonoids	黄酮	Flavanonols	二氢黄酮醇	C15H12O5	3	548-82-3	61305	61788.5	84631.1	151968	164029	172132	1.34838	0.000891089	0.0131314	0.425553	-1.23259	down
Wmlp000056	3,5-Dimethoxy-4-hydroxybenzaldehyde	3,5-二甲氧基-4-羟基苯甲醛	Others	其它类	Aldehyde compounds	醛类化合物	C9H10O4	3	-	962007	1.03391e+06	962228	335212	435244	470340	1.3552	0.00080873	0.0130977	2.38407	1.25343	up
Zahp006229	3-(2,3-dimethoxyphenyl)-N-(2-methoxybenzyl)acrylamide	3-(2,3-dimethoxyphenyl)-N-(2-methoxybenzyl)acrylamide	Alkaloids	生物碱	Alkaloids	生物碱	C19H21NO4	3	-	423105	415827	426378	935213	1.02593e+06	999548	1.39006	0.00202043	0.0217696	0.42737	-1.22644	down
Zblp004317	3-(2-oxopropyl)-3-hydroxyindolin-2-one	3-(2-氧丙基)-3-羟基吲哚-2-酮	Alkaloids	生物碱	Plumerane	吲哚类生物碱	C11H11NO3	1	-	3.38151e+06	3.64865e+06	3.50553e+06	806712	992765	920434	1.38702	2.62023e-05	0.00177182	3.87354	1.95365	up
Zahp006491	3-(3,4-dimethoxyphenyl)-N-(2-methoxybenzyl)acrylamide	3-(3,4-dimethoxyphenyl)-N-(2-methoxybenzyl)acrylamide	Alkaloids	生物碱	Alkaloids	生物碱	C19H21NO4	3	-	414592	355539	433681	1.08563e+06	1.13647e+06	997858	1.37913	0.000506095	0.0100248	0.373859	-1.41943	down
mws0467	3-(4-Hydroxyphenyl)-propionic acid	3-(4-羟基苯基)丙酸	Phenolic acids	酚酸类	Phenolic acids	酚酸类	C9H10O3	3	501-97-3	53914	60072.7	62402.6	34696.7	2294.74	2294.74	1.10019	0.0452431	0.132243	4.48986	2.16667	up
Zbqp000579	3-(Pyrazol-1-yl)-L-alanine	3-(吡唑-1-基)-L-丙氨酸	Amino acids and derivatives	氨基酸及其衍生物	Amino acids and derivatives	氨基酸及其衍生物	C6H9N3O2	1	2734-48-7	7.57331e+06	8.78298e+06	8.45143e+06	2.67472e+06	3.00467e+06	2.70327e+06	1.38537	0.00238915	0.0229546	2.95941	1.56531	up
Zbqp000676	3-(triazan-2-yl)propyl L-prolinate	3-(三氮杂-2-基)丙基L-脯氨酸	Amino acids and derivatives	氨基酸及其衍生物	Amino acids and derivatives	氨基酸及其衍生物	C8H18N4O2	3	-	143519	114243	144136	67710.8	56557.8	31547.6	1.25008	0.00496318	0.0340308	2.57931	1.36698	up
MWStz282	3-Hydroxy-3-acetonyloxindole*	3-羟基-3-乙酰甲基氧化吲哚*	Alkaloids	生物碱	Plumerane	吲哚类生物碱	C11H11NO3	2	33417-17-3	399233	351357	324832	106890	107382	167984	1.3325	0.00151284	0.0178716	2.81335	1.49229	up
MWS3036	3-Hydroxyglutaric acid	3-羟基戊二酸	Organic acids	有机酸	Organic acids	有机酸	C5H8O5	3	638-18-6	41508.3	127843	86565.5	3170.51	3170.51	3170.51	1.3646	0.0810841	0.191019	26.906	4.74986	up
Hmmp001310	3-Indoleacrylic acid*	3-吲哚丙烯酸*	Alkaloids	生物碱	Plumerane	吲哚类生物碱	C11H9NO2	1	1204-06-4	4.79289e+07	5.23249e+07	5.04051e+07	1.41245e+07	1.26696e+07	1.32418e+07	1.39065	0.000423997	0.00903759	3.76309	1.91192	up
pme2244	3-Indolepropionic acid	3-吲哚丙酸	Alkaloids	生物碱	Plumerane	吲哚类生物碱	C11H11NO2	3	830-96-6	94680.6	71003.5	74970	13619.6	28805.6	21203.3	1.31773	0.00466289	0.0331302	3.78217	1.91921	up
Lmbn001754	3-Isopropylmalic Acid*	3-异丙基苹果酸*	Organic acids	有机酸	Organic acids	有机酸	C7H12O5	1	921-28-8	1.09845e+06	1.10714e+06	1.20853e+06	5.8181e+06	6.29295e+06	5.4255e+06	1.39041	0.0024085	0.0229546	0.194686	-2.36078	down
Lmbn000216	3-Methylmalic acid*	3-甲基苹果酸*	Organic acids	有机酸	Organic acids	有机酸	C5H8O5	3	152204-30-3	198324	217843	190101	71769.8	89201.6	46952.8	1.31465	0.00153932	0.0179706	2.91581	1.5439	up
Hmln000659	3-O-Galloyl-D-glucose*	3-O-没食子酰-D-葡萄糖*	Phenolic acids	酚酸类	Phenolic acids	酚酸类	C13H16O10	2	-	225784	112449	100653	18054.7	18054.7	18054.7	1.35146	0.0846509	0.195755	8.1029	3.01844	up
ZbYn009419	3-Oleoyl sucrose	3-亚油酰蔗糖	Others	其它类	Others	其它	C30H50O12	3	-	148020	140189	147300	5759.23	5759.23	5759.23	1.39312	0.00032121	0.00768162	25.2064	4.65572	up
Hmgp002327	3-amino-2-naphthoic acid*	3-氨基-2-萘甲酸*	Alkaloids	生物碱	Alkaloids	生物碱	C11H9NO2	1	-	4.08055e+07	4.45022e+07	4.98204e+07	1.20934e+07	1.14598e+07	1.05236e+07	1.38588	0.00490373	0.0338599	3.96542	1.98747	up
Wcgn007904	3-hydroxy-6-(2-hydroxyethyl)-2,7-bis(hydroxymethyl)-2,5-dimethyl-3H-inden-1-one	3-羟基-6-(2-羟乙基)-2,7-双(羟甲基)-2,5-二甲基-3H-茚-1-酮	Others	其它类	Others	其它	C15H20O5	3	-	1.52247e+06	1.88143e+06	1.67692e+06	327172	305868	332123	1.3889	0.00546804	0.0362368	5.26421	2.39622	up
Ladp002935	3-quinolinecarboxylic acid	3-喹啉羧酸	Alkaloids	生物碱	Quinoline alkaloids	喹啉类生物碱	C10H7NO3	3	-	283271	357468	263619	39252.9	55326.5	42745.5	1.37851	0.0105573	0.0521481	6.58554	2.7193	up
Hmtp000776	4,5,6-Trihydroxy-2-cyclohexen-1-ylideneacetonitrile	4,5,6-三羟基-2-环己烯-1-亚乙乙腈	Alkaloids	生物碱	Alkaloids	生物碱	C8H9NO3	3	-	1.8066e+06	1.65128e+06	1.67183e+06	333732	306416	306638	1.39159	0.00087167	0.0130977	5.41802	2.43777	up
Lmsn000842	4,6-(S)-Hexahydroxydiphenoyl-β-D-glucose	4,6-(S)-六羟基二苯甲酰基-β-D-葡萄糖	Phenolic acids	酚酸类	Phenolic acids	酚酸类	C20H18O14	3	36378-48-0	4590.99	12629	13636.6	111007	61396.4	48373.4	1.28146	0.0769809	0.184097	0.139764	-2.83894	down
Yshj000013	4,6-dimethoxy-2-methoxyphenyl-1-O-beta-D-glucopyranoside	4,6-二甲氧基-2-甲氧基苯基-1-O-β-D-吡喃葡萄糖苷	Phenolic acids	酚酸类	Phenolic acids	酚酸类	C13H18O9	3	-	1548.86	1548.86	1548.86	8746.92	10894.5	7744.3	1.38453	0.0146978	0.0628204	0.169671	-2.55918	down
Lmbp005578	4-Hydroxy-8-sphingenine	脱水植物鞘氨醇	Lipids	脂质	Sphingolipids	鞘脂	C18H37NO3	3	-	58762.9	123997	84133.5	234731	232812	243155	1.28343	0.0141257	0.0612845	0.375537	-1.41297	down
MWSmce370	4-Hydroxyphenylacetic acid*	4-羟基苯乙酸*	Phenolic acids	酚酸类	Phenolic acids	酚酸类	C8H8O3	3	156-38-7	32957.8	38789	21365.6	4273.12	4273.12	4273.12	1.37067	0.0347085	0.110313	7.26341	2.86065	up
MWS5206	4-Hydroxyphenyllactic Acid*	4-羟苯基乳酸*	Phenolic acids	酚酸类	Phenolic acids	酚酸类	C9H10O4	3	306-23-0	80859.1	87293.7	110918	2745.89	2745.89	2745.89	1.39119	0.0100906	0.051233	33.8773	5.08225	up
Lamp000484	4-Methylazetidine-2-Carboxylic acid	4-甲基吖啶-2-羧酸	Alkaloids	生物碱	Alkaloids	生物碱	C5H9NO2	1	1779725-63-1	8.34829e+07	8.22797e+07	8.923e+07	2.66843e+07	2.74162e+07	2.70542e+07	1.39175	0.00124595	0.0158656	3.14206	1.65171	up
pme2828	4-Nitrophenol	4-硝基苯酚	Phenolic acids	酚酸类	Phenolic acids	酚酸类	C6H5NO3	3	100-02-7	2.65649e+06	2.35759e+06	2.64467e+06	1.22259e+06	595422	701989	1.30152	0.00446917	0.0322208	3.03919	1.60369	up
Zmhn002227	4-O-Glucosyl-sinapate	4-O-葡萄糖基芥子酸	Phenolic acids	酚酸类	Phenolic acids	酚酸类	C17H22O10	3	-	6060.6	6060.6	6060.6	30303	61465.4	64076.4	1.35695	0.0516066	0.144366	0.116666	-3.09954	down
Wcdp006929	4-Oxo-9,11,13,15-Octadecatetraenoic Acid	4-氧-9,11,13,15-十八碳四烯酸	Lipids	脂质	Free fatty acids	游离脂肪酸	C18H26O3	3	17699-21-7	138272	137550	119552	294884	315307	332808	1.38042	0.000552739	0.0106267	0.419274	-1.25404	down
MWS5238	4-Phenylbutyric acid	4-苯基丁酸	Organic acids	有机酸	Organic acids	有机酸	C10H12O2	3	1821-12-1	131707	233095	150048	23128	23128	23128	1.37251	0.0414051	0.125108	7.42028	2.89147	up
Zbqp003444	4-amino-5-oxo-5-(pentylamino)pentanoic acid	4-氨基-5-氧代-5-(戊氨基)戊酸	Amino acids and derivatives	氨基酸及其衍生物	Amino acids and derivatives	氨基酸及其衍生物	C10H20N2O3	1	-	2.2242e+06	1.80557e+06	2.41759e+06	582662	830155	516065	1.34341	0.0049444	0.0340209	3.34254	1.74094	up
Ladp002110	4-hydroxy-2-oxo-1,2-dihydroquinoline-3-carboxylic acid	4-羟基-2-氧代-1,2-二氢喹啉-3-羧酸	Alkaloids	生物碱	Quinoline alkaloids	喹啉类生物碱	C10H7NO4	3	73776-24-6	908336	797714	804417	355528	386193	437848	1.36773	0.000976812	0.0137897	2.12829	1.0897	up
Zmmp002106	4-methyl-1,5,2,3-dioxadiazinan-2-amine	4-甲基-1,5,2,3-二恶二嗪-2-胺	Others	其它类	Others	其它	C3H9N3O2	3	-	5.69691e+07	5.84944e+07	5.93851e+07	1.56069e+07	1.56732e+07	1.61653e+07	1.39281	0.000126646	0.00480047	3.68526	1.88177	up
ZbWn008251	4-methylbenzenesulfonic octadeca-14,17-dienoic anhydride	4-甲基苯磺酸十八碳-14,17-二烯酸酐	Others	其它类	Others	其它	C25H38O4S	3	-	698863	673151	636944	1.5365e+06	1.46268e+06	1.25304e+06	1.37159	0.0101078	0.051233	0.47245	-1.08177	down
HX1338	4-puinazolinone	4-喹唑酮	Alkaloids	生物碱	Alkaloids	生物碱	C8H6N2O	3	-	212733	374535	375500	1.14466e+06	1.22599e+06	1.27256e+06	1.34094	0.000342748	0.00800152	0.264264	-1.91995	down
MWSmce116	5'-Deoxyadenosine*	5-脱氧腺嘌呤核苷*	Nucleotides and derivatives	核苷酸及其衍生物	Nucleotides and derivatives	核苷酸及其衍生物	C10H13N5O3	3	4754-39-6	300898	388821	310021	168743	154408	152398	1.35605	0.0216084	0.0822798	2.10229	1.07196	up
Wcop004851	5,6-dimethyl-2-benzofuran-1,3-dione	5,6-dimethyl-2-benzofuran-1,3-dione	Terpenoids	萜类	Sesquiterpenoids	倍半萜	C10H8O3	1	5999-20-2	1.58593e+06	1.89665e+06	1.65501e+06	2.21381e+06	5.62894e+06	3.47372e+06	1.10791	0.17379	0.31603	0.453992	-1.13926	down
Lmmn003663	5-Glucosyloxy-2-Hydroxybenzoic acid methyl ester	5-葡萄糖氧基-2-羟基苯甲酸甲酯	Phenolic acids	酚酸类	Phenolic acids	酚酸类	C14H18O9	3	-	829.131	829.131	829.131	4145.66	40013.3	33129.9	1.25809	0.151364	0.289585	0.0321831	-4.95755	down
Lmqn009304	5-Hydroxy-7,4'-dimethoxy-6,8-dimethylflavone; Eucalyptin	5-羟基-7,4'-二甲氧基-6,8-二甲基黄酮; 桉树素	Flavonoids	黄酮	Flavones	黄酮	C19H18O5	3	3122-88-1	364311	371851	383396	138339	127502	144746	1.38894	6.58215e-06	0.000679347	2.72672	1.44717	up
MWSprf117	5-Hydroxy-DL-tryptophan(5-HTP)	5-羟色氨酸	Amino acids and derivatives	氨基酸及其衍生物	Amino acids and derivatives	氨基酸及其衍生物	C11H12N2O3	1	56-69-9	573718	577035	496779	116408	121727	129631	1.38911	0.0031982	0.0272681	4.47984	2.16345	up
pmb3066	5-O-p-Coumaroylshikimic acid O-glucoside	5-O-对香豆酰莽草酸-O-葡萄糖苷	Phenolic acids	酚酸类	Phenolic acids	酚酸类	C22H26O12	3	-	52804.1	26252.2	45422.1	5250.45	5250.45	5250.45	1.36334	0.0445079	0.130857	7.90271	2.98235	up
Lhmp122112	5-Pregnene-3,17,20-triol-20-O-glucoside	5-孕甾烯-3,17,20-三醇-20-O-葡萄糖苷	Steroids	甾体	Steroid	甾体	C27H44O8	3	-	2.46075e+06	2.28043e+06	2.4046e+06	4.80943e+06	4.55654e+06	5.33804e+06	1.37893	0.00604639	0.0384967	0.485975	-1.04105	down
Wcfp005519	5-hydroxyindene-1,3-dione	5-羟基茚-1,3-二酮	Terpenoids	萜类	Sesquiterpenoids	倍半萜	C9H6O3	1	131977-61-2	1.03342e+06	867829	890961	1.53336e+06	2.16942e+06	2.1725e+06	1.31536	0.0340551	0.108412	0.475247	-1.07325	down
Jmcn007352	5α-Hydroxycostic acid	5α-羟基木香酸	Terpenoids	萜类	Sesquiterpenoids	倍半萜	C15H22O3	3	-	379857	329226	386778	157371	153189	158482	1.38274	0.00709877	0.0423121	2.33638	1.22427	up
Jmcn006879	5β-Hydroxycostic acid	5β-羟基木香酸	Terpenoids	萜类	Sesquiterpenoids	倍半萜	C15H22O3	3	-	291713	296752	359331	155638	136302	149516	1.36525	0.0119397	0.0556146	2.14698	1.10231	up
Lacn007285	6'''-O-AcetylAmurensin	6'''-O-乙酰基去氢黄柏苷	Flavonoids	黄酮	Flavonols	黄酮醇	C28H30O12	3	-	7829.07	7712.61	10870.2	1542.52	1542.52	1542.52	1.38167	0.0196677	0.0780735	5.70751	2.51286	up
pmp001066	6'-O-Sinapoylgeniposide	6'-O-芥子酰京尼平苷	Terpenoids	萜类	Monoterpenoids	倍萜	C28H34O14	2	1012306-66-9	21163.9	53856.4	37910.8	4232.79	4232.79	4232.79	1.34944	0.0713662	0.175737	8.89337	3.15273	up
Latp004399	6,8-Dihydroxy-3-methylisocoumarin	6,8-二羟基-3-甲基异香豆素	Lignans and Coumarins	木脂素和香豆素	Coumarins	香豆素	C10H8O4	3	1204-37-1	38881.2	1903.01	1903.01	71355.7	58320.7	88091.2	1.10295	0.0219758	0.0830858	0.196022	-2.35091	down
Lmdn001560	6-DeoxyCatalpol	6-脱氧梓醇	Terpenoids	萜类	Monoterpenoids	倍萜	C15H22O9	3	99499-99-7	88240.3	63314.5	86979.4	1847.78	1847.78	1847.78	1.39084	0.0107206	0.0524265	43.0307	5.42729	up
pmp001198	6-Deoxyfagomine	6-脱氧荞麦碱	Alkaloids	生物碱	Piperidine alkaloids	哌啶类生物碱	C6H13NO2	1	197449-09-5	2.959e+07	3.00819e+07	3.04324e+07	5.8247e+06	5.54426e+06	6.01763e+06	1.39261	2.00347e-06	0.000325459	5.1824	2.37362	up
MWS2032	6-Methylnicotinamide	6-甲基烟酰胺	Alkaloids	生物碱	Pyridine alkaloids	吡啶类生物碱	C7H8N2O	3	6960-22-1	57635	33662.2	51003.5	6405.6	6405.6	6405.6	1.37454	0.029029	0.0989077	7.40501	2.8885	up
MWS4525	6-O-methylguanine	6-O-甲基鸟嘌呤	Nucleotides and derivatives	核苷酸及其衍生物	Nucleotides and derivatives	核苷酸及其衍生物	C6H7N5O	3	20535-83-5	142434	138703	157296	56314.6	82955.1	61829.6	1.33048	0.00209846	0.0222105	2.18018	1.12445	up
Lhnn101128	7-(Methylsulfonyl)heptyl glucosinolate	7-(甲基磺酰基)庚基硫苷	Others	其它类	Glucosinolates	硫苷类	C15H29NO11S3	3	-	28999.7	37676.1	59780.4	10547.8	9027.22	13143.5	1.31088	0.0738971	0.180239	3.86497	1.95046	up
Cmsp008121	7-O-Methylnaringenin	7-甲基柚皮素	Flavonoids	黄酮	Flavanones	二氢黄酮	C16H14O5	3	-	16406.8	12659.1	10498.6	33548.5	41066.5	35467.7	1.34338	0.00153955	0.0179706	0.359407	-1.47631	down
Wcjp002598	8-hydroxyquinoline	8-羟基喹啉	Alkaloids	生物碱	Quinoline alkaloids	喹啉类生物碱	C9H7NO	1	148-24-3	636546	663861	673401	127615	88895.6	118953	1.38246	4.68355e-06	0.000574027	5.88384	2.55676	up
Lmbn005662	9(10)-EpOME;(9R,10S)-(12Z)-9,10-Epoxyoctadecenoic acid	9,10-环氧十八烯酸	Lipids	脂质	Free fatty acids	游离脂肪酸	C18H32O3	1	16833-56-0	43420.6	40062.1	37110.7	14821.3	17486.6	20594.1	1.35086	0.000827441	0.0130977	2.27956	1.18876	up
pmn001689	9-Hydroxy-12-oxo-15(Z)-octadecenoic acid*	9-羟基-12-氧代-15(Z)-十八碳烯酸*	Lipids	脂质	Free fatty acids	游离脂肪酸	C18H32O4	1	-	41615.4	46770.2	51430.2	10034.7	16695.3	27198.2	1.21043	0.0136354	0.0595522	2.59263	1.37441	up
Lmtn004049	Abscisic acid	脱落酸	Terpenoids	萜类	Sesquiterpenoids	倍半萜	C15H20O4	1	21293-29-8	221351	282354	292766	36878.6	35027.7	43949.4	1.38417	0.00872957	0.0476211	6.87468	2.78129	up
mws5037	Ala-Leu	丙氨酰-亮氨酸	Amino acids and derivatives	氨基酸及其衍生物	Amino acids and derivatives	氨基酸及其衍生物	C9H18N2O3	3	3303-34-2	1.05702e+06	1.00634e+06	962439	169713	122833	129461	1.38554	8.61781e-05	0.00393012	7.16999	2.84197	up
Lmyp003934	Anacardic acid	漆树酸	Phenolic acids	酚酸类	Phenolic acids	酚酸类	C22H36O3	3	16611-84-0	207018	220495	217632	46004.8	46878.2	50464.9	1.39187	0.000184038	0.00572983	4.50055	2.1701	up
pmb2654	Anthranilate-1-O-Sophoroside	邻氨基苯甲酸-1-O-槐糖苷	Phenolic acids	酚酸类	Phenolic acids	酚酸类	C19H27NO12	3	-	1.4511e+06	1.49919e+06	1.5061e+06	671189	662204	661700	1.39254	0.000306418	0.00757611	2.23367	1.15942	up
pmp000098	Arecoline	槟榔碱	Alkaloids	生物碱	Piperidine alkaloids	哌啶类生物碱	C8H13NO2	3	63-75-2	380575	424318	478313	182195	185485	178842	1.37631	0.0126897	0.0574699	2.34795	1.2314	up
MW0145548	Arg-Tyr-Phe	精氨酰-酪氨酰-苯丙氨酸	Amino acids and derivatives	氨基酸及其衍生物	Amino acids and derivatives	氨基酸及其衍生物	C24H32N6O5	3	-	937835	695697	1.08907e+06	161162	153927	198022	1.3702	0.0220743	0.0830858	5.30608	2.40765	up
MWS201449	Asn-Leu	天冬酰胺-亮氨酸	Amino acids and derivatives	氨基酸及其衍生物	Amino acids and derivatives	氨基酸及其衍生物	C10H19N3O4	3	22601-71-4	130625	99247	93171.4	57730.4	43549.7	43348	1.31441	0.0233207	0.085863	2.23361	1.15938	up
MW0105791	Asn-Pro-Lys	天冬酰胺-脯氨酰-赖氨酸	Amino acids and derivatives	氨基酸及其衍生物	Amino acids and derivatives	氨基酸及其衍生物	C15H27N5O5	3	-	279930	310309	340451	66243	70490.2	77430.6	1.38662	0.00419682	0.0311741	4.34569	2.11958	up
MW0146058	Asp-Asp-Phe	天冬氨酰-天冬氨酰-苯丙氨酸	Amino acids and derivatives	氨基酸及其衍生物	Amino acids and derivatives	氨基酸及其衍生物	C17H21N3O8	3	-	170778	168650	218485	39788.4	7957.68	7957.68	1.28578	0.00190283	0.0208461	10.0157	3.32419	up
Lcsp002752	Asp-Pro-Phe	天冬氨酰-脯氨酰-甲硫氨酸	Amino acids and derivatives	氨基酸及其衍生物	Amino acids and derivatives	氨基酸及其衍生物	C18H23N3O6	3	-	111871	105941	104291	29838.9	28352.2	31631	1.39079	0.000174965	0.00571842	3.58602	1.84238	up
MW0105931	Aspl-pro	天冬氨酰-脯氨酸	Amino acids and derivatives	氨基酸及其衍生物	Amino acids and derivatives	氨基酸及其衍生物	C9H14N2O5	3	42155-95-3	565383	418763	421733	43374.7	66711.7	62264.7	1.37617	0.0121707	0.0561569	8.15707	3.02805	up
mws1629	Aucubin	桃叶珊瑚苷	Terpenoids	萜类	Sesquiterpenoids	倍半萜	C15H22O9	3	479-98-1	25829.3	52783.8	54026.7	1804.5	1804.5	1804.5	1.37712	0.0439709	0.130056	24.5016	4.61481	up
Zbfn013528	Beta-Hydroxypalmitic Acid*	Beta-Hydroxypalmitic Acid*	Lipids	脂质	Free fatty acids	游离脂肪酸	C16H32O3	1	-	1.7858e+06	1.66212e+06	1.82603e+06	871678	752176	827101	1.38075	0.000196259	0.00592097	2.15179	1.10554	up
Hmcp009963	Candicine	N-甲基大麦芽碱	Alkaloids	生物碱	Phenolamine	酚胺	C11H18NO+	3	6656-13-9	94113	115269	86141.6	210428	199114	222376	1.35451	0.000706226	0.0118368	0.467661	-1.09646	down
Yacn003968	Cantleyine	Cantleyine	Alkaloids	生物碱	Alkaloids	生物碱	C11H13NO3	3	30333-81-4	3.93296e+06	5.07199e+06	5.61183e+06	1.02301e+06	1.82849e+06	1.41836e+06	1.32769	0.00943891	0.0497765	3.42325	1.77536	up
pmn001687	Cis-Coutaric acid	顺式-对香豆酰酒石酸	Phenolic acids	酚酸类	Phenolic acids	酚酸类	C13H12O8	3	67920-37-0	3470.62	3470.62	3470.62	17353.1	19242.1	46493.2	1.32747	0.123629	0.252747	0.125311	-2.99642	down
mws0093	Coniferyl alcohol	松柏醇	Phenolic acids	酚酸类	Phenolic acids	酚酸类	C10H12O3	3	458-35-5	16412.3	13159.9	5050.82	31174.6	88785.9	32819.8	1.1557	0.169493	0.312555	0.22662	-2.14165	down
MWSmce449	Cyclohexaneacetic acid	环己基乙酸	Organic acids	有机酸	Organic acids	有机酸	C8H14O2	3	5292-21-7	5.78986e+06	7.88519e+06	9.28161e+06	310295	310295	310295	1.38805	0.0185702	0.0743186	24.6611	4.62416	up
ML10171848	D-Arabinono-1,4-lactone	D-阿拉伯-1,4-内酯	Others	其它类	Saccharides	糖类	C5H8O5	3	2782-09-4	159038	130460	161314	79665.4	93928.8	37032.8	1.1348	0.023803	0.086891	2.14034	1.09784	up
Zmyn000110	D-Glucosamine 1-phosphate	D-氨基葡萄糖-1-磷酸	Others	其它类	Saccharides	糖类	C6H14NO8P	3	2152-75-2	288798	259736	307096	98151.6	161021	110634	1.30841	0.00337493	0.0280433	2.31373	1.21022	up
mws0214	D-Sorbitol	D-山梨糖醇	Others	其它类	Saccharides	糖类	C6H14O6	3	50-70-4	42676.5	38444.6	43880.6	7688.91	7688.91	7688.91	1.39159	0.00234527	0.022769	5.41913	2.43806	up
MWS1926	DL-Leucine*	DL-亮氨酸*	Amino acids and derivatives	氨基酸及其衍生物	Amino acids and derivatives	氨基酸及其衍生物	C6H13NO2	1	328-39-2	7.58855e+07	8.52522e+07	9.07315e+07	2.32238e+07	2.43273e+07	2.62332e+07	1.38601	0.00401151	0.0304906	3.41359	1.77129	up
MWS00275g	DL-O-tyrosine	DL-邻酪氨酸	Amino acids and derivatives	氨基酸及其衍生物	Amino acids and derivatives	氨基酸及其衍生物	C9H11NO3	2	2370-61-8	1.27222e+06	1.27452e+06	1.38415e+06	307192	266768	307919	1.38953	0.000390646	0.0087052	4.4574	2.1562	up
Lmsp004450	Dehydrodiconiferyl alcohol	脱氢双松柏醇	Lignans and Coumarins	木脂素和香豆素	Lignans	木脂素	C20H22O6	3	4263-87-0	11116.8	17605.5	30846.7	62919.2	30157.8	35198.1	1.02287	0.140675	0.275863	0.464384	-1.10661	down
Lmfp005484	Demissine	垂茄碱	Alkaloids	生物碱	Steroid alkaloids	甾体类生物碱	C50H83NO20	3	6077-69-6	102349	390277	384342	6817.25	6817.25	6817.25	1.35288	0.0951791	0.212098	42.8798	5.42223	up
Cmyp007180	Dihydroactinidiolide	二氢猕猴桃内酯	Terpenoids	萜类	Terpene	萜类	C11H16O2	3	15356-74-8	262689	226088	324092	525757	546893	688744	1.31662	0.0111111	0.0530141	0.461491	-1.11562	down
Lmmn000806	Dimethylmalonic acid*	二甲基丙二酸*	Organic acids	有机酸	Organic acids	有机酸	C5H8O4	3	595-46-0	155165	130114	132866	5448.4	38190.4	5448.4	1.24408	0.0012159	0.0156099	8.51841	3.09058	up
MW0011908	Dioleoyl phosphatidylserine	1,2-二油酰基-sn-甘油-3-磷酸-L-丝氨酸	Lipids	脂质	Glycerol ester	甘油酯	C42H78NO10P	3	-	23586.9	17922	20612.9	7331.16	8851.24	6321.5	1.35223	0.00670644	0.0406657	2.76049	1.46492	up
mws0396	Elaidic Acid*	反油酸*	Lipids	脂质	Free fatty acids	游离脂肪酸	C18H34O2	1	112-79-8	7.10785e+06	5.4023e+06	5.32465e+06	1.16902e+07	9.81256e+06	1.56086e+07	1.26746	0.0517093	0.144447	0.480575	-1.05717	down
Qmxp101615	Ent-3β-Acetoxyisopimar-15-8β-ol	对映-3β-乙酰氧基异海松-15-烯-8β-醇	Terpenoids	萜类	Ditepenoids	二萜	C22H36O3	1	-	749286	802168	814312	191320	172004	174153	1.39095	0.000434739	0.00916691	4.40161	2.13803	up
Lskp211409	Ergosta-5,24(28)-diene-3,20,26-triol (Podecdysone C)	麦角甾烷-5,24(28)-二烯-3,20,26-三醇 (罗汉松甾酮 C)	Steroids	甾体	Steroid	甾体	C27H44O8	3	19458-46-9	2.72216e+06	2.55387e+06	2.35859e+06	5.28395e+06	5.24414e+06	5.39332e+06	1.38413	0.000310734	0.00757611	0.479518	-1.06034	down
Lazn006735	Erythro-Guaiacylglycerol-β-O-4'-dehydrodisinapyl Ether	赤式-愈创木基甘油-β-O-4'-脱氢二芥子酰醚	Lignans and Coumarins	木脂素和香豆素	Lignans	木脂素	C31H36O11	3	613684-55-2	22780.9	16753.1	22800.7	40189.4	54050.8	44289.9	1.32087	0.0125455	0.0572133	0.449972	-1.15209	down
MWS4305	Erythrose	赤藓糖	Others	其它类	Saccharides	糖类	C4H8O4	3	583-50-6	648842	1.0163e+06	1.44502e+06	2.40737e+06	3.9606e+06	2.0367e+06	1.19018	0.0806941	0.190423	0.370052	-1.4342	down
pme3034	Ethylmalonic acid*	乙基丙二酸*	Organic acids	有机酸	Organic acids	有机酸	C5H8O4	3	601-75-2	141427	141937	116073	22464	18598.1	20840.5	1.38729	0.00508869	0.0345291	6.45267	2.6899	up
pmn001381	Eucommioside	杜仲苷	Terpenoids	萜类	Monoterpenoids	倍萜	C15H26O9	3	-	66404.6	67640.1	107898	28761.4	12920.8	27286.2	1.26093	0.0386717	0.118932	3.50802	1.81066	up
Lmbn001181	Fraxetin-7,8-di-O-glucoside	秦皮素-7,8-二-O-葡萄糖苷	Lignans and Coumarins	木脂素和香豆素	Coumarins	香豆素	C22H28O15	3	-	11030.1	11030.1	11030.1	168623	142048	126899	1.39044	0.00808121	0.0457602	0.0756226	-3.72504	down
Cmqp003383	Gentianamine	龙胆胺	Alkaloids	生物碱	Pyridine alkaloids	吡啶类生物碱	C11H11NO3	3	22952-54-1	145184	119237	106512	43455	40841	51147.7	1.35949	0.0151804	0.0642315	2.73865	1.45347	up
MW0149673	Gln-Gln-Trp	谷氨酰胺-谷氨酰胺-色氨酸	Amino acids and derivatives	氨基酸及其衍生物	Amino acids and derivatives	氨基酸及其衍生物	C21H28N6O6	3	-	3.66497e+06	3.40554e+06	4.50228e+06	938849	890419	910303	1.3835	0.0122811	0.0564011	4.22431	2.07871	up
MW0149698	Gln-Gly-Tyr	谷氨酰胺-甘氨酰-酪氨酸	Amino acids and derivatives	氨基酸及其衍生物	Amino acids and derivatives	氨基酸及其衍生物	C16H22N4O6	3	-	578930	497808	644030	227377	174859	120664	1.32419	0.00225786	0.0227493	3.29081	1.71844	up
MW0106817	Gln-Leu	谷氨酰胺-亮氨酸	Amino acids and derivatives	氨基酸及其衍生物	Amino acids and derivatives	氨基酸及其衍生物	C11H21N3O4	3	-	4517.28	4517.28	4517.28	51667.4	69002.5	38453.6	1.38024	0.0316601	0.103822	0.0851655	-3.55359	down
Lcsp002225	Gln-Trp	谷氨酰胺-色氨酸	Amino acids and derivatives	氨基酸及其衍生物	Amino acids and derivatives	氨基酸及其衍生物	C16H20N4O4	3	66851-83-0	23632.9	50700.6	46228.3	3413.42	3413.42	3413.42	1.36652	0.0481759	0.137116	11.7733	3.55745	up
MW0106897	Glu-Gln-Arg	谷氨酰-谷氨酰胺-精氨酸	Amino acids and derivatives	氨基酸及其衍生物	Amino acids and derivatives	氨基酸及其衍生物	C16H29N7O7	3	-	385773	434540	510723	70846.3	101341	105736	1.36857	0.00660354	0.0406657	4.78923	2.25979	up
MWS201465	Glu-Phe	L-谷氨酸-L-苯丙氨酸	Amino acids and derivatives	氨基酸及其衍生物	Amino acids and derivatives	氨基酸及其衍生物	C14H18N2O5	1	20556-22-3	526564	515565	546140	222595	189404	256183	1.36552	0.000991028	0.0137897	2.377	1.24914	up
pme0243	Glutaric acid*	戊二酸*	Organic acids	有机酸	Organic acids	有机酸	C5H8O4	3	110-94-1	1.33036e+06	1.37459e+06	1.39683e+06	315646	429164	333328	1.37923	0.000105989	0.0043301	3.80451	1.92771	up
Lcsp001749	Gly-Glu-Leu	甘氨酰-谷氨酰-亮氨酸	Amino acids and derivatives	氨基酸及其衍生物	Amino acids and derivatives	氨基酸及其衍生物	C13H23N3O6	3	-	157026	181255	153802	51682.7	87297.2	66274.1	1.3119	0.00234009	0.022769	2.39743	1.26149	up
MW0107165	Gly-Gly-Gly	甘氨酰-甘氨酰-甘氨酸	Amino acids and derivatives	氨基酸及其衍生物	Amino acids and derivatives	氨基酸及其衍生物	C6H11N3O4	3	556-33-2	406853	355229	357800	51630.3	51667	56586.5	1.39112	0.00253679	0.0235765	7.00435	2.80825	up
MW0150400	Gly-Leu-Asp	甘氨酰-亮氨酰-天冬氨酸	Amino acids and derivatives	氨基酸及其衍生物	Amino acids and derivatives	氨基酸及其衍生物	C12H21N3O6	3	-	374910	299742	464401	139676	106744	136705	1.34053	0.0290519	0.0989077	2.97305	1.57194	up
Lcsp001899	Gly-Phe-Glu	甘氨酰-苯丙氨酰-谷氨酸	Amino acids and derivatives	氨基酸及其衍生物	Amino acids and derivatives	氨基酸及其衍生物	C16H21N3O6	3	-	48304.7	52989.4	34372.1	14158.3	28353.4	23637.1	1.16148	0.0329716	0.106451	2.05092	1.03627	up
MWS4309	Gly-Trp	甘氨酰-色氨酸	Amino acids and derivatives	氨基酸及其衍生物	Amino acids and derivatives	氨基酸及其衍生物	C13H15N3O3	3	2390-74-1	189574	186959	176458	87590.6	88502.8	96740.8	1.3852	9.02829e-05	0.00402374	2.02684	1.01923	up
MWStz038	Grossamide	克罗酰胺	Alkaloids	生物碱	Phenolamine	酚胺	C36H36N2O8	3	80510-06-1	18792.4	16241.5	14221.7	34899.3	49970.5	51496.6	1.33636	0.0259438	0.0913388	0.3612	-1.46913	down
Lazn002951	Guaiacylglycerol-β-Guaiacyl Ether	愈创木酚基甘油-β-愈创木基醚	Lignans and Coumarins	木脂素和香豆素	Lignans	木脂素	C17H20O6	3	7382-59-4	55982.5	51150.6	53652.5	30090	18720	31201.6	1.26555	0.0135043	0.0591221	2.00953	1.00686	up
Labn004454	Henryoside	二酚基水杨苷	Phenolic acids	酚酸类	Phenolic acids	酚酸类	C26H32O15	1	72021-23-9	212283	185917	239851	437128	452434	440341	1.36604	0.00246195	0.0233231	0.479773	-1.05958	down
mws1326	Herbacetin	草棉黄素	Flavonoids	黄酮	Flavonols	黄酮醇	C15H10O7	3	527-95-7	28841.9	28561.1	20619	67810.3	73901.4	74955.5	1.36001	0.000233506	0.00661122	0.360101	-1.47353	down
pmp001264	Hexadecylsphingosine	十六烷基鞘胺醇	Lipids	脂质	Sphingolipids	鞘脂	C16H35NO2	1	-	356144	306496	314900	1.0465e+06	1.03071e+06	1.14101e+06	1.38709	0.000462509	0.00943286	0.303752	-1.71903	down
MW0150850	His-Asn-Glu	组氨酰-天冬酰胺-谷氨酸	Amino acids and derivatives	氨基酸及其衍生物	Amino acids and derivatives	氨基酸及其衍生物	C15H22N6O7	3	-	12113.1	13626.1	10586.1	2117.21	2117.21	2117.21	1.38837	0.00762688	0.0443807	5.71903	2.51577	up
MW0150884	His-Cys-Gln	组氨酰-半胱氨酰-谷氨酰胺	Amino acids and derivatives	氨基酸及其衍生物	Amino acids and derivatives	氨基酸及其衍生物	C14H22N6O5S1	3	-	18660.7	31410.7	10098.5	2019.7	2019.7	2019.7	1.33488	0.100407	0.220492	9.93049	3.31187	up
MW0151090	His-Thr-Ala	组氨酰-苏氨酰-丙氨酸	Amino acids and derivatives	氨基酸及其衍生物	Amino acids and derivatives	氨基酸及其衍生物	C13H21N5O5	3	-	81300.8	82655.7	52095.2	18978.5	38585.5	31172	1.21104	0.0310893	0.102838	2.43477	1.28379	up
pme1292	Homogentisic acid*	高龙胆酸*	Phenolic acids	酚酸类	Phenolic acids	酚酸类	C8H8O4	3	451-13-8	226278	170881	214807	12503.6	12503.6	12503.6	1.39048	0.00768316	0.044576	16.3144	4.02807	up
mws0008	Hydrocinnamic acid	氢化肉桂酸	Phenolic acids	酚酸类	Phenolic acids	酚酸类	C9H10O2	3	501-52-0	1417.45	1417.45	1417.45	7087.26	25211.6	13843.7	1.32499	0.118474	0.24507	0.0921569	-3.43976	down
MW0151400	Ile-Gln-Met	异亮氨酰-谷氨酰胺-甲硫氨酸	Amino acids and derivatives	氨基酸及其衍生物	Amino acids and derivatives	氨基酸及其衍生物	C16H30N4O5S1	3	-	1.01805e+06	943650	1.10231e+06	446410	477859	373090	1.36573	0.000848892	0.0130977	2.36173	1.23985	up
pmb1096	Indole	吲哚	Alkaloids	生物碱	Plumerane	吲哚类生物碱	C8H7N	1	120-72-9	681876	649282	712214	326524	244128	274201	1.36629	0.000288763	0.00725979	2.41861	1.27418	up
pme1651	Indole-3-acetic acid (IAA)	吲哚-3-乙酸	Alkaloids	生物碱	Plumerane	吲哚类生物碱	C10H9NO2	3	87-51-4	3960.71	3960.71	3960.71	19803.5	28260.4	32378.4	1.37658	0.0252426	0.0901652	0.14771	-2.75916	down
pme0422	Isoferulic Acid	异阿魏酸	Phenolic acids	酚酸类	Phenolic acids	酚酸类	C10H10O4	1	25522-33-2	3.8691e+06	3.64377e+06	4.4628e+06	1.42336e+06	1.19499e+06	1.41175e+06	1.37742	0.00501137	0.0342414	2.97156	1.57122	up
Cmsn002371	Isolariciresinol-9-O-xyloside	异落叶松脂素-9-O-木糖苷	Lignans and Coumarins	木脂素和香豆素	Lignans	木脂素	C25H32O10	3	-	2314.43	2314.43	2314.43	27921.5	31459.7	41017.3	1.38799	0.0154011	0.0646715	0.0691574	-3.85397	down
MWSmce709	Isoquinoline	异喹啉	Alkaloids	生物碱	Isoquinoline alkaloids	异喹啉类生物碱	C9H7N	3	119-65-3	227967	269038	231137	34377.8	34377.8	34377.8	1.3912	0.00398666	0.0304524	7.06019	2.81971	up
pme2074	Jasmonoyl-L-Isoleucine	茉莉酰-L-异亮氨酸	Amino acids and derivatives	氨基酸及其衍生物	Amino acids and derivatives	氨基酸及其衍生物	C18H29NO4	3	120330-93-0	328928	412314	346650	60489.3	66528.9	69691.5	1.38728	0.00671886	0.0406657	5.53045	2.4674	up
mws0260	L-Arginine	L-精氨酸	Amino acids and derivatives	氨基酸及其衍生物	Amino acids and derivatives	氨基酸及其衍生物	C6H14N4O2	1	74-79-3	2.18657e+07	2.20025e+07	2.20587e+07	1.05893e+07	1.08982e+07	9.29452e+06	1.38163	0.00155106	0.0179978	2.14173	1.09878	up
Lcsp001322	L-Glutaminyl-L-isoleucine	谷氨酰胺-异亮氨酸	Amino acids and derivatives	氨基酸及其衍生物	Amino acids and derivatives	氨基酸及其衍生物	C11H21N3O4	1	86416-45-7	209507	153302	146768	48510.5	32412.2	57793.2	1.33058	0.0157187	0.0656966	3.67354	1.87717	up
Zmmp002167	L-Glutamyl-L-Tyrosine	L-谷氨酰-L-酪氨酸	Amino acids and derivatives	氨基酸及其衍生物	Amino acids and derivatives	氨基酸及其衍生物	C14H18N2O6	3	-	667056	866956	528698	114194	141883	126881	1.36952	0.0287124	0.0982634	5.38627	2.42929	up
mws0254	L-Histidine	L-组氨酸	Amino acids and derivatives	氨基酸及其衍生物	Amino acids and derivatives	氨基酸及其衍生物	C6H9N3O2	1	71-00-1	4.36024e+07	2.10857e+07	4.19627e+07	1.66836e+07	6.38097e+06	6.97759e+06	1.20055	0.053954	0.14923	3.55004	1.82784	up
mws1587	L-Norleucine*	L-正亮氨酸*	Amino acids and derivatives	氨基酸及其衍生物	Amino acids and derivatives	氨基酸及其衍生物	C6H13NO2	1	327-57-1	7.21301e+07	6.23078e+07	7.07519e+07	2.92848e+07	3.09074e+07	2.0075e+07	1.3337	0.000832038	0.0130977	2.55634	1.35408	up
pme0021	L-Phenylalanine	L-苯丙氨酸	Amino acids and derivatives	氨基酸及其衍生物	Amino acids and derivatives	氨基酸及其衍生物	C9H11NO2	1	63-91-2	1.38657e+07	1.19846e+07	5.68754e+06	4.05482e+07	2.61854e+07	1.68891e+07	1.10836	0.115076	0.240069	0.377145	-1.40681	down
Lmhp001461	L-Prolyl-L-Leucine	L-脯氨酰-L-亮氨酸	Amino acids and derivatives	氨基酸及其衍生物	Amino acids and derivatives	氨基酸及其衍生物	C11H20N2O3	1	52899-07-7	4.20752e+06	4.80794e+06	4.98845e+06	1.00596e+06	815697	1.14291e+06	1.37953	0.00140213	0.0168686	4.72376	2.23994	up
Lmhp001732	L-Prolyl-L-Phenylalanine	L-脯氨酰-L-苯丙氨酸	Amino acids and derivatives	氨基酸及其衍生物	Amino acids and derivatives	氨基酸及其衍生物	C14H18N2O3	2	13589-02-1	1.93565e+06	1.99889e+06	1.93525e+06	183530	162603	200917	1.39139	5.00692e-06	0.000577563	10.7299	3.42356	up
mws0262	L-Tartaric acid	L-酒石酸	Organic acids	有机酸	Organic acids	有机酸	C4H6O6	3	87-69-4	20815.4	33039.6	42255	2899.96	26826.2	2899.96	1.00904	0.108572	0.233711	2.9458	1.55866	up
mws0282	L-Tryptophan	L-色氨酸	Amino acids and derivatives	氨基酸及其衍生物	Amino acids and derivatives	氨基酸及其衍生物	C11H12N2O2	1	73-22-3	1.65745e+07	1.64336e+07	1.86693e+07	2.12529e+06	1.80555e+06	2.32152e+06	1.3889	0.00158032	0.0181228	8.26525	3.04706	up
Zmdp002216	L-γ-Glutamyl-L-leucine	L-γ-谷氨酰胺-L-亮氨酸	Amino acids and derivatives	氨基酸及其衍生物	Amino acids and derivatives	氨基酸及其衍生物	C11H20N2O5	1	2566-39-4	6.60988e+06	6.62495e+06	6.05126e+06	950703	1.07383e+06	746034	1.38406	0.000136053	0.00494073	6.96106	2.79931	up
Wcdp006912	Lauryldiethanolamine	N-十二烷基乙醇胺	Others	其它类	Others	其它	C16H35NO2	3	1541-67-9	908121	708274	710819	1.82377e+06	1.95407e+06	2.08893e+06	1.36725	0.000346991	0.00800529	0.396677	-1.33396	down
mws5035	Leu-Phe	亮氨酰-苯丙氨酸	Amino acids and derivatives	氨基酸及其衍生物	Amino acids and derivatives	氨基酸及其衍生物	C15H22N2O3	3	56217-82-4	589251	468125	523823	238192	192860	242901	1.35697	0.00548818	0.0362368	2.34615	1.2303	up
Lcsp001861	Leu-Pro	亮氨酰-脯氨酸	Amino acids and derivatives	氨基酸及其衍生物	Amino acids and derivatives	氨基酸及其衍生物	C11H20N2O3	1	-	4.04971e+06	3.90101e+06	3.62314e+06	1.59588e+06	1.75632e+06	1.68213e+06	1.38585	0.0012179	0.0156099	2.29899	1.201	up
Wcfp001236	Leucol	里白醇	Others	其它类	Others	其它	C9H7N	3	91-22-5	310181	325273	289855	29036	29036	29036	1.39266	0.00134606	0.0164378	10.6225	3.40906	up
Hmgp006701	Lyciumamide A	Lyciumamide A	Alkaloids	生物碱	Phenolamine	酚胺	C36H36O8N2	3	-	24723.4	27764.5	18190.7	39983.4	56262.5	50301.5	1.27551	0.0164071	0.0678206	0.482292	-1.05202	down
MWSHC2026	Lycoperodine-1	Lycoperodine-1	Alkaloids	生物碱	Alkaloids	生物碱	C12H12N2O2	3	42438-90-4	775001	612692	745045	174076	154834	173747	1.38416	0.00755132	0.0442034	4.24293	2.08506	up
MW0108017	Lys-Pro-Lys	赖氨酰-脯氨酰-赖氨酸	Amino acids and derivatives	氨基酸及其衍生物	Amino acids and derivatives	氨基酸及其衍生物	C17H33N5O4	3	-	294290	238333	575891	9082.35	9082.35	9082.35	1.37847	0.0746948	0.181283	40.6838	5.34638	up
MW0153174	Lys-Tyr-Gln	赖氨酰-酪氨酰-谷氨酰胺	Amino acids and derivatives	氨基酸及其衍生物	Amino acids and derivatives	氨基酸及其衍生物	C20H31N5O6	3	-	86224.9	86304.8	72267.9	27847.8	29613.2	36194.5	1.36514	0.00220044	0.0227108	2.61381	1.38615	up
pmd0153	LysoPA 16:0	溶血卵磷脂酸 16:0	Lipids	脂质	Glycerol ester	甘油酯	C19H39O7P	3	22002-85-3	6301.55	6301.55	6301.55	59244	49849.4	78858.1	1.3835	0.0222348	0.0832108	0.100583	-3.31355	down
pmb0862	LysoPC 12:0	溶血磷脂酰胆碱 12:0	Lipids	脂质	LPC	溶血磷脂酰胆碱	C20H42NO7P	3	20559-18-6	66239.9	61402.7	62730.3	19598	18101.2	21478.8	1.38734	4.30886e-05	0.0024852	3.21695	1.68569	up
pmd0130	LysoPC 14:0	溶血磷脂酰胆碱 14:0	Lipids	脂质	LPC	溶血磷脂酰胆碱	C22H46NO7P	1	20559-16-4	839724	778603	849805	269897	271201	288013	1.39047	0.000897301	0.0131314	2.97684	1.57378	up
Lmhp009129	LysoPC 15:0(2n isomer)*	溶血磷脂酰胆碱 15:0(2n异构)*	Lipids	脂质	LPC	溶血磷脂酰胆碱	C23H48NO7P	1	-	798702	815256	804353	163537	178291	183732	1.39178	2.43048e-07	0.000154064	4.60141	2.20207	up
pmb2319	LysoPC 15:0*	溶血磷脂酰胆碱 15:0*	Lipids	脂质	LPC	溶血磷脂酰胆碱	C23H48NO7P	1	108273-89-8	842815	828717	848290	204571	156664	168590	1.38596	8.02002e-05	0.00374458	4.75595	2.24973	up
pmb2260	LysoPC 15:1	溶血磷脂酰胆碱 15:1	Lipids	脂质	LPC	溶血磷脂酰胆碱	C23H46NO7P	3	-	239008	162110	225488	150620	84779.2	52420.6	1.10468	0.0410311	0.124554	2.17708	1.12239	up
pmb0855	LysoPC 16:0	溶血磷脂酰胆碱 16:0	Lipids	脂质	LPC	溶血磷脂酰胆碱	C24H50NO7P	2	17364-16-8	4.57119e+07	4.68879e+07	4.63635e+07	1.52597e+07	1.45584e+07	1.39699e+07	1.39168	4.24518e-07	0.000154064	3.17354	1.6661	up
pmd0132	LysoPC 16:0(2n isomer)	溶血磷脂酰胆碱 16:0(2n异构)	Lipids	脂质	LPC	溶血磷脂酰胆碱	C24H50NO7P	1	-	4.54112e+07	4.53908e+07	4.3169e+07	1.32689e+07	1.28943e+07	1.50333e+07	1.38838	7.2809e-06	0.000682097	3.252	1.70133	up
Lmhp010515	LysoPC 17:0(2n isomer)*	溶血磷脂酰胆碱 17:0(2n异构)*	Lipids	脂质	LPC	溶血磷脂酰胆碱	C25H52NO7P	3	-	295968	292874	305595	137991	73533.4	69052.2	1.3081	0.00997023	0.0510486	3.18785	1.67258	up
pmb2406	LysoPC 17:0*	溶血磷脂酰胆碱 17:0*	Lipids	脂质	LPC	溶血磷脂酰胆碱	C25H52NO7P	3	50930-23-9	418838	398728	379076	93819.3	101230	92935.9	1.391	0.000881638	0.0130977	4.15522	2.05493	up
Lmhp008718	LysoPC 17:2	溶血磷脂酰胆碱 17:2	Lipids	脂质	LPC	溶血磷脂酰胆碱	C25H48NO7P	3	-	272468	281219	262922	589434	624824	635021	1.38943	0.00046183	0.00943286	0.441582	-1.17925	down
mws0126	LysoPC 18:0	溶血磷脂酰胆碱 18:0	Lipids	脂质	LPC	溶血磷脂酰胆碱	C26H54NO7P	1	19420-57-6	624374	618363	647804	204703	207643	197176	1.3922	0.000114642	0.00456013	3.10168	1.63305	up
pmp001281	LysoPC 18:1	溶血磷脂酰胆碱 18:1	Lipids	脂质	LPC	溶血磷脂酰胆碱	C26H52NO7P	2	-	1.57751e+07	1.61156e+07	1.45089e+07	5.03894e+07	4.78067e+07	4.97813e+07	1.39054	1.68349e-05	0.00123171	0.313559	-1.67319	down
Lmhp010190	LysoPC 18:1(2n isomer)	溶血磷脂酰胆碱 18:1(2n异构)	Lipids	脂质	LPC	溶血磷脂酰胆碱	C26H52NO7P	1	-	1.54471e+07	1.55514e+07	1.52268e+07	4.73566e+07	4.77658e+07	4.83029e+07	1.39303	1.17864e-05	0.00100492	0.322295	-1.63355	down
Hmqp006235	LysoPC 18:4	溶血磷脂酰胆碱 18:4	Lipids	脂质	LPC	溶血磷脂酰胆碱	C26H46NO7P	3	-	67664.2	48584	49011	161199	125508	151722	1.34523	0.00399096	0.0304524	0.376935	-1.40761	down
pmd0143	LysoPC 20:0	溶血磷脂酰胆碱 20:0	Lipids	脂质	LPC	溶血磷脂酰胆碱	C28H58NO7P	3	108341-80-6	61505.7	75088.7	64054.9	16359	20914.7	15158.8	1.37339	0.00265751	0.0241268	3.82681	1.93614	up
pmd0147	LysoPC 20:2*	溶血磷脂酰胆碱 20:2*	Lipids	脂质	LPC	溶血磷脂酰胆碱	C28H54NO7P	3	-	268801	267457	267170	122367	122693	119965	1.39293	2.82193e-07	0.000154064	2.20103	1.13818	up
Lmhp009890	LysoPC 20:3	溶血磷脂酰胆碱 20:3	Lipids	脂质	LPC	溶血磷脂酰胆碱	C28H52NO7P	1	1199257-41-4	85896.5	83808.3	69294.8	265289	148894	279593	1.28755	0.0649541	0.166161	0.344491	-1.53746	down
Lmhp008337	LysoPE 14:0(2n isomer)*	溶血磷脂酰乙醇胺 14:0(2n异构)*	Lipids	脂质	LPE	溶血磷脂酰乙醇胺	C19H40NO7P	3	-	32954.8	23417.9	24722.2	5813.43	4392.6	3866.38	1.37017	0.014704	0.0628204	5.76269	2.52674	up
pmb0864	LysoPE 14:0*	溶血磷脂酰乙醇胺 14:0*	Lipids	脂质	LPE	溶血磷脂酰乙醇胺	C19H40NO7P	3	-	161415	126353	138939	24955.2	29513.3	47514.7	1.3417	0.0016786	0.0190238	4.18409	2.06491	up
Lmhp009187	LysoPE 15:0	溶血磷脂酰乙醇胺 15:0	Lipids	脂质	LPE	溶血磷脂酰乙醇胺	C20H42NO7P	3	-	176442	168837	152332	33327.7	26187	36824.9	1.3811	0.000705774	0.0118368	5.16516	2.36881	up
pmb0876	LysoPE 16:0	溶血磷脂酰乙醇胺 16:0	Lipids	脂质	LPE	溶血磷脂酰乙醇胺	C21H44NO7P	1	53862-35-4	9.0439e+06	7.84378e+06	7.92705e+06	1.8857e+06	1.83271e+06	1.81156e+06	1.39036	0.00351479	0.028304	4.48732	2.16585	up
pmd0160	LysoPE 16:0(2n isomer)	溶血磷脂酰乙醇胺 16:0(2n异构)	Lipids	脂质	LPE	溶血磷脂酰乙醇胺	C21H44NO7P	3	-	8.08582e+06	8.86849e+06	7.86285e+06	1.83226e+06	1.81207e+06	1.82721e+06	1.39162	0.00222087	0.0227493	4.53569	2.18132	up
Lmhp008763	LysoPE 16:1(2n isomer)*	溶血磷脂酰乙醇胺 16:1(2n异构)*	Lipids	脂质	LPE	溶血磷脂酰乙醇胺	C21H42NO7P	1	-	31971	23285.3	33412.2	46714.8	40075.8	100435	1.03054	0.225458	0.381471	0.473593	-1.07828	down
Lmhp009034	LysoPE 16:1*	溶血磷脂酰乙醇胺 16:1*	Lipids	脂质	LPE	溶血磷脂酰乙醇胺	C21H42NO7P	1	-	32645.6	29173.2	30286.9	107105	45624.2	103889	1.20012	0.110678	0.235656	0.358921	-1.47826	down
Lmhp007836	LysoPE 16:3	溶血磷脂酰乙醇胺 16:3	Lipids	脂质	LPE	溶血磷脂酰乙醇胺	C21H38NO7P	3	-	3556.07	1631.91	2590.83	326.382	326.382	326.382	1.35934	0.0551375	0.151647	7.94448	2.98995	up
pmb0883	LysoPE 18:0	溶血磷脂酰乙醇胺 18:0	Lipids	脂质	LPE	溶血磷脂酰乙醇胺	C23H48NO7P	3	69747-55-3	39770.5	36931.9	34238	2552.33	2552.33	2552.33	1.39246	0.00214563	0.0223807	14.4888	3.85686	up
pmb0880	LysoPE 18:0(2n isomer)	溶血磷脂酰乙醇胺 18:0(2n异构)	Lipids	脂质	LPE	溶血磷脂酰乙醇胺	C23H48NO7P	3	-	1731.29	1731.29	1731.29	11027.6	8656.46	10316.3	1.38844	0.0071408	0.0424337	0.173127	-2.5301	down
pmb0856	LysoPE 18:1(2n isomer)*	溶血磷脂酰乙醇胺 18:1(2n异构)*	Lipids	脂质	LPE	溶血磷脂酰乙醇胺	C23H46NO7P	3	-	510422	429316	511879	1.29935e+06	1.29363e+06	1.2432e+06	1.38299	5.54962e-05	0.0029413	0.378402	-1.40201	down
Lmhp008801	LysoPE 18:3	溶血磷脂酰乙醇胺 18:3	Lipids	脂质	LPE	溶血磷脂酰乙醇胺	C23H42NO7P	1	-	9.04305e+06	9.1699e+06	9.76261e+06	1.83668e+07	1.85828e+07	1.96559e+07	1.38755	0.000181247	0.00572983	0.49422	-1.01677	down
Lmhp008589	LysoPE 18:3(2n isomer)	溶血磷脂酰乙醇胺 18:3(2n异构)	Lipids	脂质	LPE	溶血磷脂酰乙醇胺	C23H42NO7P	1	-	8.56632e+06	8.12862e+06	8.36853e+06	1.79999e+07	1.7668e+07	1.79347e+07	1.39198	8.69195e-07	0.000243499	0.46758	-1.09672	down
Lmhp010514	LysoPE 20:2(2n isomer)	溶血磷脂酰乙醇胺 20:2(2n异构)	Lipids	脂质	LPE	溶血磷脂酰乙醇胺	C25H48NO7P	1	-	29496.9	30172.9	29716.9	47222.4	83561.9	54913.9	1.25258	0.100917	0.221116	0.481355	-1.05483	down
Lmhp009802	LysoPE 20:3(2n isomer)*	溶血磷脂酰乙醇胺 20:3(2n异构)*	Lipids	脂质	LPE	溶血磷脂酰乙醇胺	C25H46NO7P	3	-	22851.8	20195.5	26524.1	59453.5	62868.5	57585.5	1.37286	0.000127299	0.00480047	0.386707	-1.37069	down
Lmhp010040	LysoPE 20:3*	溶血磷脂酰乙醇胺 20:3*	Lipids	脂质	LPE	溶血磷脂酰乙醇胺	C25H46NO7P	3	-	44319.9	81629.1	44455.1	27855.3	17857.6	19597.8	1.23506	0.0982968	0.217562	2.60913	1.38357	up
Lmhp009349	LysoPE 20:4(2n isomer)*	溶血磷脂酰乙醇胺 20:4(2n异构)*	Lipids	脂质	LPE	溶血磷脂酰乙醇胺	C25H44NO7P	3	-	5903.87	5171.17	5146.7	15460.5	12869.4	12580.5	1.37333	0.0084358	0.0467305	0.396519	-1.33454	down
Lmhp008688	LysoPE 20:5	溶血磷脂酰乙醇胺 20:5	Lipids	脂质	LPE	溶血磷脂酰乙醇胺	C25H42NO7P	3	-	179364	190230	192152	433724	401601	432803	1.38849	0.000632223	0.0115868	0.442972	-1.17471	down
Lcsn003955	Maesopsin	墨沙酮	Flavonoids	黄酮	Other Flavonoids	其它类黄酮	C15H12O6	3	5989-16-2	11637.6	13737.9	9232.92	1846.18	1846.18	1846.18	1.38221	0.0175657	0.0714653	6.24866	2.64355	up
Wcfp004977	Malonyltryptophan	丙二酰色氨酸	Amino acids and derivatives	氨基酸及其衍生物	Amino acids and derivatives	氨基酸及其衍生物	C14H14N2O5	1	-	4.47911e+06	5.2185e+06	4.48342e+06	644441	777490	736171	1.38883	0.00308787	0.0265584	6.57107	2.71613	up
MWS201399	Met-Asn	甲硫氨酰-天冬酰胺	Amino acids and derivatives	氨基酸及其衍生物	Amino acids and derivatives	氨基酸及其衍生物	C9H17N3O4S	3	36261-61-7	21904.4	11192.4	19071.3	1319.87	1319.87	1319.87	1.37529	0.0375435	0.116492	13.175	3.71974	up
MW0108165	Met-Lys-Lys	甲硫氨酰-赖氨酰-赖氨酸	Amino acids and derivatives	氨基酸及其衍生物	Amino acids and derivatives	氨基酸及其衍生物	C17H35N5O4S1	3	-	657571	457458	565216	17543.8	33629	46776.8	1.36342	0.0105569	0.0521481	17.1542	4.10049	up
MWS201421	Met-Phe	甲硫氨酰-苯丙氨酸	Amino acids and derivatives	氨基酸及其衍生物	Amino acids and derivatives	氨基酸及其衍生物	C14H20N2O3S	3	14492-14-9	49704.5	31147.9	31327.5	25214.4	7564.58	16319.4	1.06667	0.0601772	0.160254	2.2848	1.19207	up
MW0153708	Met-Tyr-Tyr	甲硫氨酰-酪氨酰-酪氨酸	Amino acids and derivatives	氨基酸及其衍生物	Amino acids and derivatives	氨基酸及其衍生物	C23H29N3O6S1	3	-	1.0744e+06	1.08726e+06	1.30019e+06	301848	234071	227431	1.3789	0.00348281	0.0282567	4.53508	2.18113	up
pmb0818	Methoxyindoleacetic acid	甲氧基吲哚乙酸	Alkaloids	生物碱	Plumerane	吲哚类生物碱	C11H11NO3	3	3471-31-6	4.19619e+06	4.31087e+06	4.94794e+06	634176	694892	700637	1.39044	0.00352177	0.028304	6.62905	2.7288	up
Hmtn001288	Methyl 2,4-dihydroxyphenylacetate*	2,4-二羟基苯乙酸甲酯*	Phenolic acids	酚酸类	Phenolic acids	酚酸类	C9H10O4	3	67828-42-6	87078.3	99762.5	97315	876.403	876.403	876.403	1.39301	0.00170945	0.0191556	108.076	6.75591	up
Lhjp111617	Methylgeniposide	甲基京尼平苷	Terpenoids	萜类	Monoterpenoids	倍萜	C18H26O10	3	-	13652	7676.14	18414.1	1184.37	1184.37	1184.37	1.36102	0.0603701	0.160254	11.1852	3.48352	up
MWS5136	Mono-Methyl Glutarate*	单甲基戊二酸*	Organic acids	有机酸	Organic acids	有机酸	C6H10O4	3	1501-27-5	34221.2	17575.4	34950.6	3515.07	3515.07	3515.07	1.36075	0.0464508	0.134771	8.2262	3.04023	up
Lmsp010763	Monolinolenin*	单亚麻酸甘油酸*	Lipids	脂质	Glycerol ester	甘油酯	C21H36O4	1	75685-85-7	977186	1.07192e+06	1.09115e+06	478957	416490	465880	1.38158	0.0005836	0.0109707	2.30676	1.20587	up
Lmmn002164	Monomethyl succinate*	琥珀酸单甲酯*	Organic acids	有机酸	Organic acids	有机酸	C5H8O4	3	3878-55-5	96173.6	95365.5	95601.5	24286.5	25648	20840.5	1.38761	0.000281026	0.00715704	4.05709	2.02045	up
pme3207	Muconic acid	己二烯二酸	Organic acids	有机酸	Organic acids	有机酸	C6H6O4	1	1119-72-8	1.23514e+06	455594	412838	2.56462e+06	3.10536e+06	3.86877e+06	1.26885	0.00789467	0.0452674	0.220529	-2.18096	down
pmb0492	N',N'',N'''-p-Coumaroyl-cinnamoyl-caffeoyl spermidine	N',N'',N'''-对香豆酰肉桂酰咖啡酰亚精胺	Alkaloids	生物碱	Phenolamine	酚胺	C34H37N3O6	3	-	166556	144674	146770	105773	66871.4	46243.1	1.18661	0.0312302	0.102928	2.0924	1.06516	up
Wayn001257	N-(1-Deoxy-1-fructosyl)Leucine	N-(1-脱氧-1-果糖基)亮氨酸	Amino acids and derivatives	氨基酸及其衍生物	Amino acids and derivatives	氨基酸及其衍生物	C12H23NO7	3	-	68013	95729.9	70523.6	5531.13	5531.13	5531.13	1.38859	0.014554	0.0626244	14.1181	3.81947	up
MWStz070	N-(2-Hydroxy-4-methoxyphenyl)acetamide	N-(2-羟基-4-甲氧基苯基)乙酰胺	Alkaloids	生物碱	Alkaloids	生物碱	C9H11NO3	1	58469-06-0	3.70364e+07	3.92781e+07	4.03506e+07	1.44391e+07	1.59942e+07	1.80644e+07	1.37648	9.60202e-05	0.00409338	2.40558	1.26639	up
pmn001727	N-(4-O-(Glucosyl)-E-feruloyl)-tyramine	N-(4-O-(葡萄糖基)-E-阿魏酰)-酪胺	Alkaloids	生物碱	Phenolamine	酚胺	C24H29NO9	3	-	99099.9	91034.9	109256	393126	296300	329980	1.37573	0.011566	0.0543909	0.293692	-1.76762	down
Zbqn004590	N-(acetyl)phenylalanine	N-(乙酰基)苯丙氨酸	Amino acids and derivatives	氨基酸及其衍生物	Amino acids and derivatives	氨基酸及其衍生物	C11H13NO3	2	-	4.18843e+06	3.45916e+06	4.26676e+06	867855	1.05262e+06	833633	1.38062	0.00459916	0.0329257	4.32604	2.11305	up
Zbqn004234	N-(malonyl)phenylalanine	N-(丙二酰基)苯丙氨酸	Amino acids and derivatives	氨基酸及其衍生物	Amino acids and derivatives	氨基酸及其衍生物	C12H13NO5	1	-	957541	835303	928816	312025	292023	189237	1.34832	0.000266493	0.00693223	3.43087	1.77857	up
Zbqn004682	N-(malonyl)tryptophan	N-(丙二酰基)色氨酸	Amino acids and derivatives	氨基酸及其衍生物	Amino acids and derivatives	氨基酸及其衍生物	C14H14N2O5	1	-	4.8891e+06	4.58719e+06	5.56035e+06	629327	508172	663913	1.38724	0.00347495	0.0282567	8.34714	3.06128	up
Zahp006071	N-(sec-butyl)tetradeca-2,4,8-trienamide	N-(sec-butyl)tetradeca-2,4,8-trienamide	Alkaloids	生物碱	Alkaloids	生物碱	C18H31NO	3	-	18556.3	13290.7	16027.1	115975	119637	116101	1.38682	1.44702e-06	0.000257965	0.136117	-2.87708	down
pmb3079	N-Acetyl-D-glucosamine-1-phosphate	N-乙酰-D-葡萄糖胺-1-磷酸	Others	其它类	Saccharides	糖类	C8H16NO9P	1	6866-69-9	65194.3	79087.9	88955.4	9830.58	9830.58	9830.58	1.38791	0.0101416	0.051257	7.90857	2.98342	up
MWSslk120	N-Acetyl-DL-phenylalanine	N-乙酰-DL-苯丙氨酸	Amino acids and derivatives	氨基酸及其衍生物	Amino acids and derivatives	氨基酸及其衍生物	C11H13NO3	3	2901-75-9	493957	425938	353666	81847.2	106897	116596	1.36597	0.0114345	0.0539803	4.17097	2.06038	up
pmb2591	N-Acetyl-L-Tryptophan	N-乙酰-L-色氨酸	Amino acids and derivatives	氨基酸及其衍生物	Amino acids and derivatives	氨基酸及其衍生物	C13H14N2O3	1	1218-34-4	6.21776e+07	5.7729e+07	5.29973e+07	1.66366e+07	1.01554e+07	1.46727e+07	1.36232	0.000312935	0.00757611	4.1699	2.06001	up
pme0075	N-Acetyl-L-glutamic acid	N-乙酰-L-谷氨酸	Amino acids and derivatives	氨基酸及其衍生物	Amino acids and derivatives	氨基酸及其衍生物	C7H11NO5	2	1188-37-0	341042	309433	330180	742997	589507	789721	1.35312	0.0222325	0.0832108	0.462088	-1.11376	down
pme0253	N-Acetyl-L-leucine	N-乙酰-L-亮氨酸	Amino acids and derivatives	氨基酸及其衍生物	Amino acids and derivatives	氨基酸及其衍生物	C8H15NO3	3	1188-21-2	2.19574e+06	3.08755e+06	2.82048e+06	773280	944932	870527	1.3645	0.0172968	0.0705176	3.13039	1.64634	up
Zmgn002106	N-Acetyl-L-phenylalanine	N-乙酰-L-苯丙氨酸	Amino acids and derivatives	氨基酸及其衍生物	Amino acids and derivatives	氨基酸及其衍生物	C11H13NO3	1	2018-61-3	5.34035e+06	4.95829e+06	5.68352e+06	1.18656e+06	1.23382e+06	766792	1.36762	0.000154915	0.00540779	5.01453	2.32612	up
pme3382	N-Acetyl-L-threonine	N-乙酰-L-苏氨酸	Amino acids and derivatives	氨基酸及其衍生物	Amino acids and derivatives	氨基酸及其衍生物	C6H11NO4	3	17093-74-2	227631	271710	213746	94277.3	44188.2	101036	1.25767	0.00324127	0.0275157	2.97738	1.57404	up
pmp001287	N-Benzylmethylene isomethylamine	N-苯亚甲基异甲胺	Alkaloids	生物碱	Alkaloids	生物碱	C8H9N	1	-	6.17e+07	5.59341e+07	5.86544e+07	1.79329e+07	1.84132e+07	1.70896e+07	1.3906	0.00101681	0.013847	3.29908	1.72206	up
pmb0323n	N-Caffeoylputrescine	咖啡酰腐胺	Alkaloids	生物碱	Phenolamine	酚胺	C13H18N2O3	3	29554-26-5	19810.4	2730.2	7472.79	546.04	546.04	546.04	1.27513	0.204271	0.356384	18.3218	4.19549	up
MW0108720	N-Carbamoylsarcosine	N-氨甲酰肌氨酸	Amino acids and derivatives	氨基酸及其衍生物	Amino acids and derivatives	氨基酸及其衍生物	C4H8N2O3	3	-	7.18021e+06	7.14549e+06	6.97022e+06	1.61194e+06	1.82122e+06	1.71445e+06	1.39138	4.71385e-07	0.000154064	4.13705	2.0486	up
Wahp001558	N-Feruloylspermidine	N-阿魏酰亚精胺	Alkaloids	生物碱	Phenolamine	酚胺	C17H27N3O3	3	-	116618	92966.1	104873	247227	226046	182419	1.33326	0.0178188	0.0721656	0.479581	-1.06015	down
Wafp004641	N-Feruloyltyramine 4-glucoside	N-阿魏酰酪胺 4-葡萄糖苷	Alkaloids	生物碱	Phenolamine	酚胺	C24H29NO9	1	-	272422	214015	269428	586993	498716	502675	1.35049	0.0023278	0.022769	0.47587	-1.07136	down
Zbqp002511	N-Methylisoleucine	N-甲基异亮氨酸	Amino acids and derivatives	氨基酸及其衍生物	Amino acids and derivatives	氨基酸及其衍生物	C7H15NO2	3	39554-61-5	1182.94	1182.94	1182.94	5914.69	44286.4	72343.2	1.24964	0.175554	0.318729	0.0289594	-5.10982	down
Zahp005843	N-Trans-Sinapoyltyramine	N-反式芥子酰酪胺	Alkaloids	生物碱	Phenolamine	酚胺	C19H21NO5	3	200125-11-7	9208.49	8653.41	4415.88	883.176	883.176	883.176	1.35878	0.0495681	0.140169	8.40821	3.0718	up
Zbqn004681	N-acetyl-tryptophan	N-乙酰基色氨酸	Amino acids and derivatives	氨基酸及其衍生物	Amino acids and derivatives	氨基酸及其衍生物	C13H14N2O3	1	-	2.83869e+07	3.23535e+07	2.77461e+07	4.40176e+06	4.8863e+06	3.14957e+06	1.37907	0.00125954	0.0159352	7.11442	2.83075	up
HJKP000649	N-benzylformamide*	正苄基甲酰胺*	Alkaloids	生物碱	Alkaloids	生物碱	C8H9NO	3	6343-54-0	4.22224e+06	4.73165e+06	4.41054e+06	1.69006e+06	1.63843e+06	1.62319e+06	1.38972	0.00241135	0.0229546	2.69897	1.43241	up
Zbqn003921	N-carboxy-N-(2-oxo-2-phenylethyl)-L-alanine	N-羧基-N-(2-氧代-2-苯乙基)-L-丙氨酸	Amino acids and derivatives	氨基酸及其衍生物	Amino acids and derivatives	氨基酸及其衍生物	C12H13NO5	1	-	43202.5	86307	60440	11640.5	16342.3	23271	1.27991	0.0576299	0.155024	3.70606	1.88989	up
ZbWp002423	N-methylphenylalanine	N-甲基苯丙氨酸	Amino acids and derivatives	氨基酸及其衍生物	Amino acids and derivatives	氨基酸及其衍生物	C10H13NO2	3	-	1.50866e+06	1.3156e+06	1.29844e+06	368208	386064	383139	1.38893	0.00434127	0.0317658	3.62464	1.85784	up
Zbqn002318	N-succinyl-proline	N-丁二酰基脯氨酸	Amino acids and derivatives	氨基酸及其衍生物	Amino acids and derivatives	氨基酸及其衍生物	C9H13NO5	3	-	228137	175431	275896	91346.9	100533	82343.1	1.32625	0.0394251	0.120612	2.47778	1.30905	up
Zmyn000155	N-α-Acetyl-L-ornithine	N-α-乙酰基-L-鸟氨酸	Amino acids and derivatives	氨基酸及其衍生物	Amino acids and derivatives	氨基酸及其衍生物	C7H14N2O3	3	6205-08-9	1.06468e+06	1.4543e+06	1.14018e+06	687514	492245	581171	1.30715	0.0193476	0.0769588	2.07797	1.05518	up
Wahp003564	N1,N10-Bis(p-coumaroyl)spermidine	双(对香豆酰基)亚精胺	Alkaloids	生物碱	Phenolamine	酚胺	C25H31N3O4	3	114916-05-1	2.63084e+06	3.03838e+06	2.81261e+06	619377	548401	459261	1.38377	0.000832308	0.0130977	5.21305	2.38213	up
pme0122	N6-Acetyl-L-lysine	N6-乙酰-L-赖氨酸	Amino acids and derivatives	氨基酸及其衍生物	Amino acids and derivatives	氨基酸及其衍生物	C8H16N2O3	3	692-04-6	180676	400616	335850	41909.5	65419.3	38092.1	1.32581	0.0564779	0.152877	6.30681	2.65691	up
pme0376	Naringenin (5,7,4'-Trihydroxyflavanone)*	柚皮素*	Flavonoids	黄酮	Flavanones	二氢黄酮	C15H12O5	3	480-41-1	50160.5	63627.1	67751	202002	144770	174608	1.3507	0.0138792	0.0603482	0.348188	-1.52206	down
mws1179	Naringenin-7-O-glucoside (Prunin)	柚皮素-7-O-葡萄糖苷 (樱桃苷)	Flavonoids	黄酮	Flavanones	二氢黄酮	C21H22O10	3	529-55-5	61406.5	82344	51556.1	139300	154627	174314	1.31862	0.00271355	0.024522	0.417107	-1.26151	down
Wbtn014060	Nigrolineaxanthone K	Nigrolineaxanthone K	Flavonoids	黄酮	Other Flavonoids	其它类黄酮	C23H22O5	3	864516-31-4	514124	489297	595927	1.16623e+06	1.11525e+06	985065	1.36162	0.00216871	0.0225018	0.489614	-1.03028	down
Zmzn005445	Nummularine R	Nummularine R	Alkaloids	生物碱	Alkaloids	生物碱	C33H41N5O5	3	113836-69-4	115191	45372.8	99303.2	198516	134413	239210	1.08719	0.055481	0.152165	0.454203	-1.13859	down
mws0704	O-Phosphorylethanolamine	磷酸乙醇胺	Alkaloids	生物碱	Alkaloids	生物碱	C2H8NO4P	3	1071-23-4	461327	400814	476208	128880	146852	140464	1.38449	0.00396278	0.0304524	3.21567	1.68512	up
Lmyn012331	Octadec-6-enoic acid; Petroselinic acid*	十八碳-6-烯酸; 岩芹酸*	Lipids	脂质	Free fatty acids	游离脂肪酸	C18H34O2	1	593-39-5	4.21885e+06	3.30096e+06	3.1793e+06	6.89049e+06	5.64186e+06	9.01367e+06	1.26033	0.054831	0.151016	0.49657	-1.00993	down
pmf0557	Orange I	橙黄 I	Alkaloids	生物碱	Alkaloids	生物碱	C16H11N2NaO4S	3	523-44-4	140445	89317.2	152203	13251.2	13251.2	13251.2	1.37801	0.0274614	0.0956515	9.60835	3.26429	up
MWS0132	Oxiglutatione	氧化谷胱甘肽	Amino acids and derivatives	氨基酸及其衍生物	Amino acids and derivatives	氨基酸及其衍生物	C20H32N6O12S2	1	27025-41-8	1.53241e+06	1.14638e+06	3.31872e+06	1.0262e+06	872920	709576	1.0319	0.231886	0.388657	2.29904	1.20103	up
Zbsp008181	Persicogenin (5,3'-dihydroxy-7,4'-dimethoxyflavanone)	桃苷元 (5,3'-二羟基-7,4'-二甲氧基黄烷酮)	Flavonoids	黄酮	Flavanones	二氢黄酮	C17H16O6	3	28590-40-1	62729.8	57405.8	52421.1	234238	228820	326617	1.37394	0.0221853	0.0832108	0.218516	-2.19419	down
Laxp004658	Phaseic Acid	菜豆酸	Terpenoids	萜类	Sesquiterpenoids	倍半萜	C15H20O5	3	24394-14-7	231901	355888	389852	26597.8	29548.5	54648.5	1.3521	0.0233814	0.085863	8.82389	3.14142	up
MWS201447	Phe-Ala	L-苯丙氨酸-L-丙氨酸	Amino acids and derivatives	氨基酸及其衍生物	Amino acids and derivatives	氨基酸及其衍生物	C12H16N2O3	3	3918-87-4	604267	647621	602321	84010.5	57207.8	40655.8	1.3713	1.09592e-05	0.000976863	10.195	3.34979	up
MWS201483	Phe-Hyp	苯丙氨酰-羟脯氨酸	Amino acids and derivatives	氨基酸及其衍生物	Amino acids and derivatives	氨基酸及其衍生物	C14H18N2O4	3	90965-82-5	24324.4	38345.6	30213.3	1513.75	1513.75	1513.75	1.38799	0.0185261	0.0742937	20.4532	4.35426	up
MWS201458	Phe-Ile	苯丙氨酰-异亮氨酸	Amino acids and derivatives	氨基酸及其衍生物	Amino acids and derivatives	氨基酸及其衍生物	C15H22N2O3	3	22951-94-6	6888.52	6888.52	6888.52	57554.7	74317.2	94023.4	1.38318	0.0229207	0.0848066	0.0914829	-3.45035	down
MWS201478	Phe-Ser	L-苯丙氨酸-L-丝氨酸	Amino acids and derivatives	氨基酸及其衍生物	Amino acids and derivatives	氨基酸及其衍生物	C12H16N2O4	3	16053-39-7	252844	230238	231055	109005	106175	126654	1.37364	0.000251473	0.00666404	2.08913	1.06291	up
MWS201442	Phe-Thr	L-苯丙氨酸-L-苏氨酸	Amino acids and derivatives	氨基酸及其衍生物	Amino acids and derivatives	氨基酸及其衍生物	C13H18N2O4	1	51352-44-4	402165	424380	381107	145980	132435	148855	1.3875	0.000647023	0.0117082	2.82644	1.49898	up
MW0155371	Phe-Trp-Phe	苯丙氨酰-色氨酰-苯丙氨酸	Amino acids and derivatives	氨基酸及其衍生物	Amino acids and derivatives	氨基酸及其衍生物	C29H30N4O4	3	-	168175	209254	155465	25821.3	36908.5	36908.5	1.37216	0.00955823	0.0498818	5.34828	2.41907	up
MWS1848	Phenyl acetate	乙酸苯酯	Phenolic acids	酚酸类	Phenolic acids	酚酸类	C8H8O2	3	122-79-2	556020	617541	586253	238571	210594	287305	1.36202	0.000376226	0.00857321	2.38952	1.25672	up
MWS201415	Pro-Asp	L-脯氨酸-L-天冬氨酸	Amino acids and derivatives	氨基酸及其衍生物	Amino acids and derivatives	氨基酸及其衍生物	C9H14N2O5	2	85227-98-1	6.93234e+06	6.5272e+06	4.59277e+06	294069	197578	234481	1.38521	0.0151546	0.0642315	24.8611	4.63582	up
MW0155819	Pro-Asp-Tyr	脯氨酰-天冬氨酰-酪氨酸	Amino acids and derivatives	氨基酸及其衍生物	Amino acids and derivatives	氨基酸及其衍生物	C18H23N3O7	3	-	1.111e+06	1.14791e+06	1.21269e+06	337076	281985	382903	1.37849	3.87396e-05	0.0023658	3.4648	1.79277	up
Lcsp002236	Pro-Glu-Ile	脯氨酰-谷氨酰-异亮氨酸	Amino acids and derivatives	氨基酸及其衍生物	Amino acids and derivatives	氨基酸及其衍生物	C16H27N3O6	3	-	90829.2	83679.8	102717	6300.37	6300.37	6300.37	1.39182	0.00413153	0.0308916	14.6672	3.87452	up
Lcsp001705	Pro-Ile-Asp*	脯氨酰-异亮氨酰-天冬氨酸*	Amino acids and derivatives	氨基酸及其衍生物	Amino acids and derivatives	氨基酸及其衍生物	C15H25N3O6	3	-	239076	243423	230950	84634.5	65017	74033.2	1.38101	6.06101e-05	0.0031278	3.18953	1.67334	up
MW0106526	Pro-Phe	脯氨酰-苯丙氨酸	Amino acids and derivatives	氨基酸及其衍生物	Amino acids and derivatives	氨基酸及其衍生物	C14H18N2O3	3	-	1.9918e+06	2.14047e+06	2.16671e+06	180588	266662	250413	1.38469	9.86242e-05	0.00411494	9.02871	3.17452	up
Lcsp001646	Pro-Pro-Val	脯氨酰-脯氨酰-缬氨酸	Amino acids and derivatives	氨基酸及其衍生物	Amino acids and derivatives	氨基酸及其衍生物	C15H25N3O4	3	-	115464	103343	80546.5	28717.7	15158.3	38374.1	1.27769	0.00642336	0.0398614	3.63955	1.86376	up
MWS201466	Pro-Trp	L-脯氨酸-L-色氨酸	Amino acids and derivatives	氨基酸及其衍生物	Amino acids and derivatives	氨基酸及其衍生物	C16H19N3O3	3	35310-39-5	46326.7	61757.9	36497.9	18105	19823.5	12527.3	1.29558	0.0413322	0.125081	2.86553	1.5188	up
MW0156027	Pro-Tyr-Glu	脯氨酰-酪氨酰-谷氨酸	Amino acids and derivatives	氨基酸及其衍生物	Amino acids and derivatives	氨基酸及其衍生物	C19H25N3O7	3	-	2.48393e+07	2.719e+07	2.7008e+07	6.04541e+06	6.16179e+06	6.46258e+06	1.39164	0.00108873	0.0144257	4.23343	2.08183	up
mws0918	Prunetin (5,4'-Dihydroxy-7-methoxyisoflavone)	樱黄素	Flavonoids	黄酮	Isoflavones	异黄酮	C16H12O5	3	552-59-0	12020.6	20297.7	15484.9	30293.9	31663.6	34523	1.2787	0.00922702	0.049169	0.495471	-1.01313	down
Zbzp000519	Retronecine	倒千里光裂碱	Alkaloids	生物碱	Pyrrole alkaloids	吡咯类生物碱	C8H13NO2	3	480-85-3	8.442e+06	7.35366e+06	8.77583e+06	2.81578e+06	2.69664e+06	2.31608e+06	1.37956	0.0027567	0.0247977	3.13873	1.65018	up
Lmqn000351	Rutinose	芸香糖	Others	其它类	Saccharides	糖类	C12H22O10	3	90-74-4	68942.3	82159.8	39121.2	1962.74	1962.74	1962.74	1.3815	0.0403347	0.123203	32.3057	5.01372	up
Zmdp000972	S-Methyl-L-cysteine	S-甲基-L-半胱氨酸	Amino acids and derivatives	氨基酸及其衍生物	Amino acids and derivatives	氨基酸及其衍生物	C4H9NO2S	3	1187-84-4	4.10973e+06	4.5841e+06	4.03319e+06	1.56341e+06	1.51744e+06	1.49036e+06	1.38849	0.00356573	0.0285404	2.78417	1.47725	up
WaYn002595	Salicin 6'-Sulfate	水杨苷 6-硫酸酯	Phenolic acids	酚酸类	Phenolic acids	酚酸类	C13H18O10S	3	-	26185.2	25102.5	33064	5020.51	5020.51	5020.51	1.3863	0.0114512	0.0539803	5.60047	2.48555	up
pmn001361	Salvianolic acid I	丹酚酸 I	Phenolic acids	酚酸类	Phenolic acids	酚酸类	C27H22O12	3	150072-80-3	1322.58	1322.58	1322.58	13532.1	6612.9	16569.9	1.34848	0.0657471	0.167659	0.108069	-3.20998	down
MW0156648	Ser-Arg-Met	丝氨酰-精氨酰-甲硫氨酸	Amino acids and derivatives	氨基酸及其衍生物	Amino acids and derivatives	氨基酸及其衍生物	C14H28N6O5S1	3	-	292214	298204	345306	54837.1	99925.1	89328.3	1.3421	0.000543717	0.0105567	3.83351	1.93867	up
Lcsp001306	Ser-Ile-Asp	丝氨酰-异亮氨酰-天冬氨酸	Amino acids and derivatives	氨基酸及其衍生物	Amino acids and derivatives	氨基酸及其衍生物	C13H23N3O7	3	-	179580	208510	216491	60517.5	64421.1	71832	1.38085	0.00396931	0.0304524	3.07252	1.61942	up
MW0109628	Ser-Met-Arg	丝氨酰-精氨酸	Amino acids and derivatives	氨基酸及其衍生物	Amino acids and derivatives	氨基酸及其衍生物	C14H28N6O5S	3	189342-36-7	262681	262712	256387	621916	523452	558588	1.38142	0.00840145	0.0467305	0.458803	-1.12405	down
ZbBn000907	Shikimic Acid-3-Phosphate	莽草酸-3-磷酸	Organic acids	有机酸	Organic acids	有机酸	C7H11O8P	3	-	2379.58	2379.58	2379.58	11897.9	18722.5	12649	1.37594	0.030709	0.102415	0.164984	-2.5996	down
mws0853	Sinapyl alcohol*	芥子醇*	Phenolic acids	酚酸类	Phenolic acids	酚酸类	C11H14O4	3	537-33-7	2198.37	2198.37	2198.37	10991.8	32139.1	30336.7	1.33339	0.0811416	0.191019	0.0897688	-3.47764	down
mws4019	Sugiol*	柳杉酚*	Terpenoids	萜类	Ditepenoids	二萜	C20H28O2	1	511-05-7	975.607	975.607	975.607	10268.7	4878.04	5971.81	1.35759	0.066364	0.1687	0.13859	-2.8511	down
Lmcp001538	Theobromine	可可碱	Alkaloids	生物碱	Alkaloids	生物碱	C7H8N4O2	3	83-67-0	35012	30602.7	23612.8	3545.92	3545.92	3545.92	1.3849	0.0156723	0.0656697	8.38782	3.0683	up
Lcsn001170	Thr-Leu	苏氨酰-亮氨酸	Amino acids and derivatives	氨基酸及其衍生物	Amino acids and derivatives	氨基酸及其衍生物	C10H20N2O4	3	50299-12-2	82393.8	63633.4	51503.4	18096.1	17365.2	11672.5	1.34387	0.0258797	0.0913388	4.19085	2.06724	up
MW0157809	Thr-Thr-Asn	苏氨酰-苏氨酰-天冬酰胺	Amino acids and derivatives	氨基酸及其衍生物	Amino acids and derivatives	氨基酸及其衍生物	C12H22N4O7	3	-	4.33631e+06	5.32328e+06	4.10617e+06	745615	896192	901402	1.38353	0.00883399	0.0478549	5.41275	2.43636	up
MW0157837	Thr-Tyr-Gln	苏氨酰-酪氨酰-谷氨酰胺	Amino acids and derivatives	氨基酸及其衍生物	Amino acids and derivatives	氨基酸及其衍生物	C18H26N4O7	3	-	1228.83	1228.83	1228.83	12111.1	6144.14	22700.3	1.3216	0.12419	0.253156	0.0900118	-3.47374	down
Zmdn005775	Torachrysone-8-O-(2''-acetyl)glucoside	决明酮-8-O-(2''-乙酰)葡萄糖苷	Quinones	醌类	Naphthol	萘酚类	C22H26O10	3	-	10836.9	10836.9	10836.9	54184.5	54230.8	54265.8	1.39321	2.94403e-07	0.000154064	0.199843	-2.32306	down
Zbsp007500	Tricin-4'-O-Guaicylglycerol	Tricin-4'-O-Guaicylglycerol	Flavonoids	黄酮	Flavones	黄酮	C28H28O11	3	-	90853.7	95885.4	83785	388583	348695	382077	1.38948	0.000953454	0.0136476	0.241679	-2.04884	down
Zmzp006857	Tricin-4'-O-[β-guaiacyl-(9''-O-acetyl)glycerol]ether	苜蓿素-4'-O-[β-愈创木基-(9''-O-乙酰基)甘油基]醚	Flavonoids	黄酮	Flavones	黄酮	C29H28O12	3	-	2.19953e+06	2.37107e+06	2.21171e+06	9.59737e+06	1.01373e+07	1.0123e+07	1.39201	0.000184079	0.00572983	0.227155	-2.13825	down
ZBN0262	Tricin-4'-O-guaiacylglycerol-5-O-Feruloyl	苜蓿素-4'-O-愈创木甘油醚-5-O-阿魏酰	Flavonoids	黄酮	Flavones	黄酮	C37H34O14	3	-	62120.3	43499.6	40242.7	174440	239568	252064	1.35731	0.0134588	0.0591221	0.218989	-2.19107	down
ZBN0266	Tricin-5-O-(3'-malonyl)glucoside-7-O-rhamnoside	苜蓿素-5-O-(3'-丙二酰基)葡萄糖苷-7-O-鼠李糖苷	Flavonoids	黄酮	Flavones	黄酮	C32H36O19	3	-	1668.38	30824.8	1668.38	77013.4	46996.3	56875.3	1.10998	0.0207318	0.0805051	0.188858	-2.40463	down
MWS201187	Trp-His	色氨酰-组氨酸	Amino acids and derivatives	氨基酸及其衍生物	Amino acids and derivatives	氨基酸及其衍生物	C17H19N5O3	3	-	64526.2	50944.6	59163.6	124045	126632	113794	1.36474	0.000341138	0.00800152	0.479146	-1.06146	down
MW0158245	Trp-Ser-Ser	色氨酰-丝氨酰-丝氨酸	Amino acids and derivatives	氨基酸及其衍生物	Amino acids and derivatives	氨基酸及其衍生物	C17H22N4O6	3	-	72936	60600.7	84342.6	30586.9	40105.3	30477.5	1.31695	0.0164306	0.0678206	2.1536	1.10675	up
Wagp002398	Tryptophan N-Rutinoside	色氨酸 N-芸香苷	Amino acids and derivatives	氨基酸及其衍生物	Amino acids and derivatives	氨基酸及其衍生物	C23H32N2O11	2	-	351579	751864	386206	95088.5	109717	73880.5	1.32451	0.0866509	0.198276	5.34526	2.41826	up
MW0158433	Tyr-Gln-Gln	酪氨酰-谷氨酰-谷氨酰胺	Amino acids and derivatives	氨基酸及其衍生物	Amino acids and derivatives	氨基酸及其衍生物	C19H27N5O7	3	-	1034.99	1034.99	1034.99	75922.3	52787.7	66962.9	1.39134	0.0108296	0.0524369	0.0158682	-5.97772	down
MW0110229	Tyr-tyr-tyr	酪氨酰-酪氨酰-酪氨酸	Amino acids and derivatives	氨基酸及其衍生物	Amino acids and derivatives	氨基酸及其衍生物	C27H29N3O7	3	7390-78-5	1.1085e+06	1.03346e+06	1.11649e+06	343161	398097	306295	1.37951	3.98121e-05	0.0023658	3.11053	1.63716	up
pme3188	Uridine 5'-monophosphate	尿苷 5'-单磷酸	Nucleotides and derivatives	核苷酸及其衍生物	Nucleotides and derivatives	核苷酸及其衍生物	C9H13N2O9P	1	58-97-9	107245	105570	108219	9488.05	9488.05	9488.05	1.39318	6.29444e-05	0.00316497	11.2785	3.49551	up
MWS201445	Val-Pro	L-缬氨酸-L-脯氨酸	Amino acids and derivatives	氨基酸及其衍生物	Amino acids and derivatives	氨基酸及其衍生物	C10H18N2O3	1	20488-27-1	1.29376e+06	1.24446e+06	1.26292e+06	524129	481409	463357	1.38863	7.30446e-06	0.000682097	2.58775	1.3717	up
Zbqp003189	Val-Val	缬氨酸-缬氨酸	Amino acids and derivatives	氨基酸及其衍生物	Amino acids and derivatives	氨基酸及其衍生物	C10H20N2O3	2	3918-94-3	639704	720651	744712	209440	155982	176220	1.3793	0.000797952	0.0130399	3.88646	1.95845	up
Lmhn001386	Vnilloyltartaric acid	香草酰酒石酸	Phenolic acids	酚酸类	Phenolic acids	酚酸类	C12H12O9	3	-	463.465	463.465	463.465	13962.3	18273.4	7810.33	1.37766	0.051282	0.143663	0.03472	-4.84809	down
Lskp211411	abutasterone	abutasterone	Steroids	甾体	Steroid	甾体	C27H44O8	3	88669-02-7	2.59156e+06	2.50042e+06	2.33786e+06	5.40774e+06	4.59309e+06	5.61806e+06	1.36959	0.00974084	0.0505159	0.475696	-1.07189	down
Hahp000801	alanine betaine	丙氨酸甜菜碱	Alkaloids	生物碱	Alkaloids	生物碱	C5H11NO2	3	-	5.63209e+07	5.67194e+07	5.45353e+07	1.32493e+07	1.3311e+07	1.47932e+07	1.39126	2.15873e-06	0.000325459	4.05227	2.01873	up
Lmgn003544	cis-3-Hexenyl acetate	顺式-3-己烯基乙酸酯	Lipids	脂质	Free fatty acids	游离脂肪酸	C8H14O2	3	3681-71-8	458434	3.79092e+06	1.63962e+06	91686.8	91686.8	91686.8	1.27163	0.195089	0.345649	21.4097	4.4202	up
Zamn006847	glycoric acid	glycoric acid	Others	其它类	Others	其它	C12H20O4	3	-	3.62396e+06	3.54138e+06	3.52402e+06	1.39667e+06	1.53976e+06	1.59264e+06	1.38723	6.80644e-05	0.00325547	2.36016	1.23889	up
Wbsp001110	hupcrispatine	hupcrispatine	Alkaloids	生物碱	Alkaloids	生物碱	C10H10N2O	3	-	6.13291e+07	5.76352e+07	5.55279e+07	2.17302e+07	2.88643e+07	2.99007e+07	1.34574	0.00105664	0.014174	2.16773	1.11619	up
Lcsp013328	linoleoyl ethanolamine	亚油酰乙醇胺	Others	其它类	Others	其它	C20H37NO2	2	68171-52-8	396500	377748	392821	108404	109953	108392	1.39276	0.000380351	0.00857321	3.57177	1.83664	up
Zasp102439	m-Aminophenylacetylene	间氨基苯乙炔	Alkaloids	生物碱	Alkaloids	生物碱	C8H7N	1	54060-30-9	656476	600493	554714	173167	201712	201712	1.38282	0.00256701	0.0237448	3.14206	1.65171	up
Smcp001137	naphthisoxazol A	naphthisoxazol A	Alkaloids	生物碱	Alkaloids	生物碱	C11H9NO2	3	-	5.18086e+07	4.65992e+07	4.67394e+07	1.20844e+07	1.01206e+07	1.37336e+07	1.38072	0.000200372	0.00595349	4.03875	2.01391	up
Wmsn000915	teufruintin B	teufruintin B	Terpenoids	萜类	Ditepenoids	二萜	C22H32O7	3	-	223430	292879	274849	32228.6	32228.6	32228.6	1.38907	0.00798178	0.0453689	8.18277	3.03259	up
Wbmn00859	vitelignin A	vitelignin A	Lignans and Coumarins	木脂素和香豆素	Lignans	木脂素	C20H16O8	3	-	389561	423397	324946	1.14835e+06	1.27267e+06	1.29506e+06	1.37851	0.000268664	0.00693223	0.306211	-1.7074	down
Wbmp002283	Α-hydroxyquinoline	Α-羟基喹啉	Alkaloids	生物碱	Alkaloids	生物碱	C9H7NO	1	-	519229	440365	468510	89674	77628.8	83896.5	1.38944	0.00289266	0.0255518	5.68514	2.5072	up
Lmyn007769	β-Anhydroicaritin	β-脱水淫羊藿素	Flavonoids	黄酮	Other Flavonoids	其它类黄酮	C21H20O6	2	38226-86-7	8922.27	9667.91	7359.27	1471.85	1471.85	1471.85	1.3874	0.00886145	0.0478661	5.87682	2.55504	up
mws0147	β-Hydroxyisovaleric acid	β-羟基异戊酸	Organic acids	有机酸	Organic acids	有机酸	C5H10O3	3	625-08-1	1.13057e+06	1.18253e+06	922443	247899	183589	192919	1.37853	0.00570382	0.0374086	5.18181	2.37346	up
Zmmp003443	γ-Glu-Trp	γ-谷氨酰-色氨酸	Amino acids and derivatives	氨基酸及其衍生物	Amino acids and derivatives	氨基酸及其衍生物	C16H19N3O5	1	66471-20-3	3.62752e+06	3.34658e+06	3.74127e+06	131618	198245	145233	1.38852	0.00087962	0.0130977	22.5541	4.49532	up
Zbqp002414	γ-Glu-leu	γ-谷氨酰-亮氨酸	Amino acids and derivatives	氨基酸及其衍生物	Amino acids and derivatives	氨基酸及其衍生物	C11H20N2O5	1	-	707576	907178	784025	102318	121129	118549	1.38746	0.00667245	0.0406657	7.01407	2.81025	up
Zmdp001647	γ-Glutamyl-L-valine	γ-谷氨酰胺缬氨酸	Amino acids and derivatives	氨基酸及其衍生物	Amino acids and derivatives	氨基酸及其衍生物	C10H18N2O5	1	-	672394	533652	569642	284328	177567	240409	1.3241	0.00306988	0.02652	2.52837	1.33821	up
Zmdn001564	γ-Glutamylphenylalanine	γ-谷氨酰胺苯丙氨酸	Amino acids and derivatives	氨基酸及其衍生物	Amino acids and derivatives	氨基酸及其衍生物	C14H18N2O5	1	7432-24-8	1.13581e+06	1.0982e+06	1.23488e+06	159910	89238.6	109210	1.37737	0.000191969	0.00588205	9.67991	3.27499	up
Lmfp004911	γ-Tomatine	γ-番茄碱	Alkaloids	生物碱	Steroid alkaloids	甾体类生物碱	C39H65NO12	3	81037-16-3	1.97434e+06	1.7299e+06	1.56936e+06	249781	559369	507168	1.30928	0.00115623	0.0150563	4.00633	2.00228	up
Zmdp001663	γ-glutamylmethionine	γ-谷氨酰胺甲硫氨酸	Amino acids and derivatives	氨基酸及其衍生物	Amino acids and derivatives	氨基酸及其衍生物	C10H18N2O5S	2	17663-87-5	208587	178230	160003	55705.2	63325	79999.6	1.34935	0.005542	0.0364694	2.74743	1.45808	up
Lmyp003024	(2-Oxo-3H-1,3-benzoxazol-6-yl)acetate	(2-氧-3H-1,3-苯并恶唑-6-基)乙酸酯	Alkaloids	生物碱	Alkaloids	生物碱	C9H7NO4	1	-	3.14355e+06	2.25342e+06	2.12172e+06	7.11512e+06	4.40486e+06	5.45671e+06	1.16885	0.0422608	0.0991226	0.442883	-1.175	down
Lmsp102909	(6S,9R)-Deoxysappanol	{6S,9R)-去氧苏木酚	Phenolic acids	酚酸类	Phenolic acids	酚酸类	C19H30O7	3	-	744882	737249	702353	180381	57152.7	182886	1.17679	0.00256824	0.0197274	5.19596	2.37739	up
Walp012785	(Oxiran-2-yl)methyl octadeca-9,12-dienoate*	(Oxiran-2-yl)methyl octadeca-9,12-dienoate*	Lipids	脂质	Glycerol ester	甘油酯	C21H36O3	2	856386-19-1	510425	1.23021e+06	515419	199090	170428	168608	1.17508	0.138679	0.221886	4.19243	2.06779	up
Hmbp006861	1,2-O-Diferuloylglycerol*	1,2-O-二阿魏酰甘油酯*	Phenolic acids	酚酸类	Phenolic acids	酚酸类	C23H24O9	3	-	2.1048e+06	1.61923e+06	1.77314e+06	1.35791e+07	1.31398e+07	1.29244e+07	1.28005	2.78699e-06	0.000759414	0.138666	-2.85032	down
pmp000091	1,3-O-Diferuloylglycerol*	1,3-二阿魏酰甘油*	Phenolic acids	酚酸类	Phenolic acids	酚酸类	C23H24O9	3	83008-46-2	2.3775e+06	2.67677e+06	2.13233e+06	1.25131e+07	1.55271e+07	1.18302e+07	1.2741	0.00963214	0.0394854	0.180249	-2.47194	down
Waln010743	1-(2,3-dihydroxypropoxy)-3-(((2-(dimethylamino)ethoxy)(hydroxy)phosphoryl)oxy)propan-2-yl (11Z,14Z)-octadeca-11,14-dienoate	1-(2,3-二羟基丙氧基)-3-(((2-(二甲基氨基)乙氧基)(羟基)磷酰基)氧基)丙-2-基 (11Z,14Z)-十八碳-11,14-二烯酸	Lipids	脂质	LPE	溶血磷脂酰乙醇胺	C28H54NO9P	1	-	3.10598e+07	2.98591e+07	3.00247e+07	6.42267e+07	6.30266e+07	6.31132e+07	1.28312	4.22926e-07	0.0002718	0.477729	-1.06574	down
Waln009920	1-(2,3-dihydroxypropoxy)-3-(((2-(dimethylamino)ethoxy)(hydroxy)phosphoryl)oxy)propan-2-yl (8E,11Z,14Z)-octadeca-8,11,14-trienoate	1-(2,3-二羟基丙氧基)-3-(((2-(二甲基氨基)乙氧基)(羟基)磷酰基)氧基)丙-2-基 (8E,11Z,14Z)-十八碳-8,11,14-三烯酸	Lipids	脂质	LPE	溶血磷脂酰乙醇胺	C28H52NO9P	1	-	1.62656e+07	1.58496e+07	1.54578e+07	6.22225e+07	5.92089e+07	5.86504e+07	1.2832	0.00038879	0.00896225	0.264175	-1.92044	down
Waln010449	1-(2,3-dihydroxypropoxy)-3-(((2-(dimethylamino)ethoxy)(hydroxy)phosphoryl)oxy)propan-2-yl (E)-hexadec-9-enoate	1-(2,3-二羟基丙氧基)-3-(((2-(二甲基氨基)乙氧基)(羟基)磷酰基)氧基)丙-2-基 (E)-9-十六碳烯酸	Lipids	脂质	LPE	溶血磷脂酰乙醇胺	C26H52NO9P	1	-	649404	612543	543294	3.43092e+06	3.0477e+06	2.82271e+06	1.27836	0.00405765	0.0255483	0.194084	-2.36525	down
Waln011704	1-(2,3-dihydroxypropoxy)-3-(((2-(dimethylamino)ethoxy)(hydroxy)phosphoryl)oxy)propan-2-yl (Z)-14-Octadecenoic Acid	1-(2,3-二羟基丙氧基)-3-(((2-(二甲基氨基)乙氧基)(羟基)磷酰基)氧基)丙-2-基 (Z)-14-十八碳烯酸	Lipids	脂质	LPE	溶血磷脂酰乙醇胺	C28H56NO9P	1	-	407303	374558	366446	1.06462e+06	961252	865050	1.2703	0.00748584	0.0341198	0.397211	-1.33202	down
WaYn011606	1-(2,3-dihydroxypropoxy)-3-(((2-(dimethylamino)ethoxy)(hydroxy)phosphoryl)oxy)propan-2-yl heptadecanoate	1-(2,3-二羟基丙氧基)-3-(((2-(二甲基氨基)乙氧基)(羟基)磷酰基)氧基)丙-2-基十七烷酸酯	Lipids	脂质	LPE	溶血磷脂酰乙醇胺	C27H56NO9P	1	-	2538.72	2538.72	2538.72	72951.6	70632	63723.7	1.28357	0.0017291	0.0159997	0.0367385	-4.76656	down
Waln011524	1-(2,3-dihydroxypropoxy)-3-(((2-(dimethylamino)ethoxy)(hydroxy)phosphoryl)oxy)propan-2-yl palmitate*	1-(2,3-二羟基丙氧基)-3-(((2-(二甲基氨基)乙氧基)(羟基)磷酰基)氧基)丙-2-基 棕榈酸酯*	Lipids	脂质	LPE	溶血磷脂酰乙醇胺	C26H54NO9P	1	-	1.94027e+06	1.89327e+06	1.81645e+06	2.03738e+07	2.01628e+07	1.98421e+07	1.28377	3.1321e-05	0.00241547	0.0935759	-3.41772	down
Zbfn002690	1-(4-Hydroxybenzoyl)Glucose; 25545-07-7	1-(4-羟基苯甲酰基)葡萄糖	Phenolic acids	酚酸类	Phenolic acids	酚酸类	C13H16O8	1	-	206976	184067	168939	419424	325305	403477	1.23824	0.0126494	0.046365	0.487702	-1.03593	down
Lmxp010913	1-(9Z-Octadecenoyl)-2-(9-oxo-nonanoyl)-sn-glycero-3-phosphocholine	1-(9Z-十八烯酰基)-2-(9-氧-壬酰基)-sn-甘油-3-磷酸胆碱	Lipids	脂质	Glycerol ester	甘油酯	C35H66NO9P	3	-	17759.3	32347.8	24981.9	372591	362781	345366	1.27315	3.84719e-05	0.00255772	0.0694794	-3.84727	down
MW0058413	1-(9Z-nonadecenoyl)-glycero-3-phosphoethanolamine*	PE(19:1(9Z)/0:0)*	Lipids	脂质	Glycerol ester	甘油酯	C24H48NO7P	1	-	3.23368e+06	3.42047e+06	3.09571e+06	1.94935e+07	1.55518e+07	1.49351e+07	1.27666	0.010888	0.0427405	0.195073	-2.35791	down
pmp001187	1-(Dihydroxyphenyl)-N2,N3-bis(4-hydroxyphenethyl)-(5-8)-dimethoxy-1,2dihydronaphthalene-2,3-dicarboxamide	1-(二羟基苯基)-N 2,N 3-双(4-羟基苯乙基)-(5-8)-二甲氧基-1,2-二氢萘-2,3-二甲酰胺	Alkaloids	生物碱	Phenolamine	酚胺	C36H36N2O8	3	-	61791.3	53206.7	73556.6	156342	131630	137088	1.2425	0.00146995	0.0146842	0.443595	-1.17269	down
Wafn004433	1-Hexanol arabinosylglucoside	1-己醇 阿拉伯糖基葡萄糖苷	Others	其它类	Others	其它	C17H32O10	3	-	3.45342e+06	3.37839e+06	2.30912e+06	7.85316e+06	4.72149e+06	6.71728e+06	1.13145	0.0506259	0.111305	0.473822	-1.07758	down
Zbfn007626	1-Linoleoyl-2-Lysophosphatidic Acid Monobutylamine Ester	1-亚油酰-2-溶血磷脂酸单丁胺酯	Others	其它类	Others	其它	C25H48NO7P	3	-	6.83034e+06	7.37433e+06	6.40863e+06	1.658e+07	1.74302e+07	1.34665e+07	1.25541	0.0139561	0.0484501	0.434177	-1.20364	down
Lmhp009384	1-Linoleoylglycerol-2,3-di-O-glucoside	1-亚油酰甘油酯-2,3-二-O-葡萄糖苷	Lipids	脂质	Glycerol ester	甘油酯	C33H58O14	3	-	101993	92461.3	126000	31659.8	41608.5	35972	1.25287	0.0139436	0.0484501	2.93348	1.55261	up
Wafp002310	1-O-Caffeoyllysine	1-O-咖啡酰赖氨酸	Alkaloids	生物碱	Phenolamine	酚胺	C15H20N2O5	3	-	139812	132522	147633	416187	437065	361510	1.27442	0.00567921	0.0295727	0.34572	-1.53232	down
pmn001319	1-O-Feruloyl-3-O-p-Coumaroylglycerol	1-O-阿魏酰-3-O-对香豆酰甘油	Phenolic acids	酚酸类	Phenolic acids	酚酸类	C22H22O8	2	-	73615.1	74394.7	87715.5	222577	201953	180308	1.26445	0.00474203	0.0274484	0.389733	-1.35944	down
Saln004708	1-O-Glucopyranosylamplexine	1-O-Glucopyranosylamplexine	Terpenoids	萜类	Monoterpenoids	倍萜	C16H26O9	3	-	243466	255469	101433	393773	379062	470759	1.01952	0.0295876	0.0775717	0.482769	-1.0506	down
Zmhn001926	1-O-Salicyloyl-β-D-glucose*	1-O-水杨酰-β-D-葡萄糖*	Phenolic acids	酚酸类	Phenolic acids	酚酸类	C13H16O8	1	60517-74-0	728985	418674	512459	1.30292e+06	1.04872e+06	1.24912e+06	1.17594	0.00623255	0.0309959	0.461047	-1.11701	down
pmb3068	1-O-p-Coumaroylquinic acid*	1-O-对香豆酰奎宁酸*	Phenolic acids	酚酸类	Phenolic acids	酚酸类	C16H18O8	1	-	1.11103e+07	1.11442e+07	1.04942e+07	2.35235e+07	2.59609e+07	2.4554e+07	1.27925	0.00129774	0.0143245	0.442321	-1.17683	down
Walp003918	1-O-p-Coumaroylsedoheptulose	1-O-p-香豆酰癸酮糖	Phenolic acids	酚酸类	Phenolic acids	酚酸类	C16H20O9	1	-	63234.2	48820.2	28523.3	5704.66	5704.66	5704.66	1.25168	0.0549608	0.117608	8.2142	3.03812	up
pmb0296	1-Oleoyl-Sn-Glycerol	单酰甘油酯(18:1)	Lipids	脂质	Glycerol ester	甘油酯	C21H40O4	3	129784-87-8	666538	536460	521038	255724	277244	246299	1.25499	0.0177134	0.0558028	2.21238	1.1456	up
MW0017099	12-Oxophytodienoic Acid	12-氧代植物二烯酸	Lipids	脂质	Free fatty acids	游离脂肪酸	C18H28O3	2	71606-07-0	41020.5	50507.4	44992.6	203565	201082	189652	1.27907	2.98601e-05	0.00241547	0.229717	-2.12207	down
Wcsn009782	12-hydroxy-2,6,10-trimethyltrideca-2,5-dien-4-one	12-hydroxy-2,6,10-trimethyltrideca-2,5-dien-4-one	Others	其它类	Others	其它	C16H28O2	3	-	244285	240273	229137	583652	558164	563927	1.28215	2.33767e-05	0.00214621	0.418407	-1.25702	down
pmb2804	13S-Hydroperoxy-9Z,11E-octadecadienoic acid	13-氢过氧化-9,11-十八碳二烯酸	Lipids	脂质	Free fatty acids	游离脂肪酸	C18H32O4	3	33964-75-9	1.78218e+06	2.67802e+06	2.57549e+06	813973	274334	306795	1.1806	0.00822085	0.0357002	5.04314	2.33432	up
MW0012356	14(15)-Epetre methyl ester	14（15)-EET甲酯	Lipids	脂质	Free fatty acids	游离脂肪酸	C21H34O3	3	73804-67-8	449412	1.35516e+06	1.16663e+06	163325	118866	150835	1.19563	0.0915859	0.164063	6.8615	2.77852	up
mws0945	15-Oxo-5Z,8Z,11Z,13E-eicosatetraenoic acid	15-羰基-5Z,8Z,11Z,13E-二十碳四烯酸	Lipids	脂质	Free fatty acids	游离脂肪酸	C20H30O3	3	81416-72-0	1625.65	1625.65	1625.65	24336.5	25270.5	28315	1.28325	0.00242479	0.0190816	0.0625876	-3.99798	down
Zaxn005958	18-Oxoferruginol*	18-氧-铁锈酚*	Terpenoids	萜类	Ditepenoids	二萜	C20H28O2	1	-	152028	142032	161831	397871	351015	406770	1.27376	0.00272654	0.0198844	0.394487	-1.34195	down
pme3961	2'-Deoxyadenosine*	2'-脱氧腺苷*	Nucleotides and derivatives	核苷酸及其衍生物	Nucleotides and derivatives	核苷酸及其衍生物	C10H13N5O3	3	958-09-8	714180	727243	591419	1.81474e+06	2.00095e+06	1.89937e+06	1.27171	8.12134e-05	0.00419668	0.3557	-1.49127	down
pme2776	2'-Deoxyinosine	2-脱氧肌苷	Nucleotides and derivatives	核苷酸及其衍生物	Nucleotides and derivatives	核苷酸及其衍生物	C10H12N4O4	3	890-38-0	60924	69143	34058.5	126924	125465	123816	1.1486	0.0210947	0.0631532	0.436266	-1.19672	down
pmc0066	2'-Deoxyinosine-5'-monophosphate	2'-脱氧肌苷-5'-单磷酸	Nucleotides and derivatives	核苷酸及其衍生物	Nucleotides and derivatives	核苷酸及其衍生物	C10H13N4O7P	3	3393-18-8	1.2049e+07	1.04204e+07	1.31161e+07	4.50759e+06	3.95641e+06	3.85498e+06	1.26836	0.00703009	0.0328184	2.88867	1.53041	up
Lcsn006884	2,2'-(3-methylcyclohexane-1,1-diyl)diacetic acid	2,2'-(3-甲基环己烷-1,1-二基)二乙酸	Organic acids	有机酸	Organic acids	有机酸	C11H18O4	3	5345-12-0	2238.32	2238.32	2238.32	21497.9	24210.5	22386.6	1.28333	0.00151939	0.0148448	0.0986115	-3.3421	down
Hmjn003948	2,3,6-Trihydroxyurs-12-en-28-oic acid (Madasiatic acid)	2,3,6-三羟基熊果-12-烯-28-酸 (马达积雪草酸)	Terpenoids	萜类	Triterpene	三萜	C30H48O5	3	26532-66-1	71873.8	54225.4	64249.4	140278	137755	128197	1.25254	0.000559502	0.00998815	0.468574	-1.09365	down
Lmyp003026	2,4-Dihydroxy-7-methoxy-1,4-benzoxazin-3(4H)-one (DIMBOA)	2,4-二羟基-7-甲氧基-1,4-苯并噁嗪-3(4H)-酮 (DIMBOA)	Alkaloids	生物碱	Alkaloids	生物碱	C9H9NO5	1	15893-52-4	2.86303e+06	2.95603e+06	2.60318e+06	5.83391e+06	5.62863e+06	6.24593e+06	1.27303	0.000462913	0.00910711	0.475605	-1.07216	down
MWStz005	2,7-Dihydroxy-1,4-benzoxazin-3(4H)-one (DHBOA)	2,7-二羟基-2H-1,4-苯并恶嗪-3(4H)-酮 (DHBOA)	Alkaloids	生物碱	Alkaloids	生物碱	C8H7NO4	3	69804-59-7	13893.7	18569.7	11486.1	2297.23	2297.23	2297.23	1.26938	0.0271898	0.0742521	6.37718	2.67292	up
Wbjp001581	2-(((3-(2-aminoethyl)indolin-5-yl)oxy)methyl)-6-((3,4-dihydroxybutan-2-yl)oxy)tetrahydro-2H-pyran-3,4,5-triol	2-(((3-(2-氨基乙基)吲哚-5-基)氧基)甲基)-6-((3,4-二羟基丁-2-基)氧)四氢-2H-吡喃-3,4,5-三醇	Alkaloids	生物碱	Alkaloids	生物碱	C20H32N2O8	3	-	556658	512026	457304	1.2314e+06	1.76824e+06	1.45257e+06	1.25263	0.0215948	0.0640534	0.342748	-1.54478	down
WaYn010475	2-(2,3-dihydroxypropoxy)-3-(((2-(dimethylamino)ethoxy)(hydroxy)phosphoryl)oxy)propan-2-yl (E)-hexadec-9-enoate	2-(2,3-二羟基丙氧基)-3-(((2-(二甲基氨基)乙氧基)(羟基)磷酰基)氧基)丙-2-基 (E)-9-十六碳烯酸	Lipids	脂质	LPE	溶血磷脂酰乙醇胺	C26H52NO9P	2	-	131773	92688.9	96932.3	1.53698e+06	1.32703e+06	1.37549e+06	1.27869	0.00171325	0.0159576	0.0758095	-3.72148	down
WaYn011395	2-(2,3-dihydroxypropoxy)-3-(((2-(dimethylamino)ethoxy)(hydroxy)phosphoryl)oxy)propan-2-yl (Z)-14-Octadecenoic Acid	2-(2,3-二羟基丙氧基)-3-(((2-(二甲基氨基)乙氧基)(羟基)磷酰基)氧基)丙-2-基 (Z)-14-十八碳烯酸	Lipids	脂质	LPE	溶血磷脂酰乙醇胺	C28H56NO9P	1	-	2.33394e+06	2.20416e+06	2.22017e+06	7.02959e+06	6.8435e+06	6.60361e+06	1.28264	0.00023455	0.0067419	0.330047	-1.59926	down
Waln010192	2-(2,3-dihydroxypropoxy)-3-(((2-(dimethylamino)ethoxy)(hydroxy)phosphoryl)oxy)propyl (8E,11Z,14Z)-octadeca-8,11,14-trienoate	2-(2,3-二羟基丙氧基)-3-(((2-(二甲基氨基)乙氧基)(羟基)磷酰基)氧基)丙基 (8E,11Z,14Z)-十八碳-8,11,14-三烯酸	Lipids	脂质	LPE	溶血磷脂酰乙醇胺	C28H52NO9P	1	-	1.57308e+07	1.61335e+07	1.52796e+07	6.24424e+07	5.94128e+07	5.9047e+07	1.28318	0.000325678	0.00794819	0.260604	-1.94007	down
Waln011222	2-(2,3-dihydroxypropoxy)-3-(((2-(dimethylamino)ethoxy)(hydroxy)phosphoryl)oxy)propyl palmitate*	2-(2,3-二羟基丙氧基)-3-(((2-(二甲基氨基)乙氧基)(羟基)磷酰基)氧基) 棕榈酸丙酯*	Lipids	脂质	LPE	溶血磷脂酰乙醇胺	C26H54NO9P	1	-	1.84794e+06	1.85575e+06	1.76271e+06	2.07451e+07	2.0243e+07	1.91575e+07	1.28359	0.000631271	0.0107265	0.0908861	-3.4598	down
pme3083	2-(Formylamino)benzoic acid	2-(甲酰氨基)苯甲酸	Phenolic acids	酚酸类	Phenolic acids	酚酸类	C8H7NO3	3	3342-77-6	328410	418274	455329	914604	779266	723360	1.21525	0.00619668	0.0309959	0.497268	-1.0079	down
Walp007182	2-Aminohexadecane-1,15-diol	2-氨基十六烷-1,15-二醇	Lipids	脂质	Sphingolipids	鞘脂	C16H35NO2	2	-	1.54093e+06	1.55889e+06	1.46312e+06	6.14648e+06	6.50978e+06	5.75118e+06	1.28172	0.00192631	0.0168051	0.247885	-2.01226	down
WaYp007721	2-Aminohexadecane-1,16,16-triol	2-氨基十六烷-1,16,16-三醇	Lipids	脂质	Sphingolipids	鞘脂	C16H35NO3	2	-	88298.3	83586.6	71910.1	201086	146676	151232	1.21904	0.0318334	0.0817241	0.488573	-1.03335	down
Walp007043	2-Aminohexadecane-1,4-diol	2-氨基十六烷-1,4-二醇	Lipids	脂质	Sphingolipids	鞘脂	C16H35NO2	2	-	1.59736e+06	1.48957e+06	1.33944e+06	6.60377e+06	6.53755e+06	6.66934e+06	1.28097	1.06246e-05	0.00120495	0.223434	-2.16208	down
Walp007190	2-AminoicoSane-1,5,7,19-tetraol	2-氨基二十烷-1,5,7,19-四醇	Lipids	脂质	Sphingolipids	鞘脂	C20H43NO4	2	-	267685	282013	239190	1.08357e+06	813157	869306	1.26817	0.0136738	0.0479328	0.285206	-1.80992	down
Zmjn003398	2-Dodecenedioic acid	2-十二烯二酸	Lipids	脂质	Free fatty acids	游离脂肪酸	C12H20O4	2	6402-36-4	67577.6	71684.1	57211.1	225112	239914	227101	1.27598	1.34215e-05	0.00143759	0.283868	-1.81671	down
Lmtn001569	2-Glucosyl-glucosyloxy-2-phenylacetic acid amide	2-葡糖基-葡萄糖-2-苯基乙酸酰胺	Alkaloids	生物碱	Alkaloids	生物碱	C20H29NO12	3	-	37153.6	44260.7	43465	85415.9	102839	111414	1.25345	0.0115955	0.044182	0.416724	-1.26284	down
Lmrn001951	2-Hydroxy-3-(4-Hydroxyphenyl)Propanoic Acid	2-羟基-(4-羟基苯基)丙酸	Phenolic acids	酚酸类	Phenolic acids	酚酸类	C9H10O4	3	23508-35-2	40116.7	49863.3	36187.5	21194.5	23712.5	14970	1.17367	0.014806	0.0499929	2.10711	1.07527	up
Lmmn004951	2-Hydroxy-4-methyl-3-undecanoyloxypentanoic acid methyl ester	2-羟基-4-甲基-3-十一烷氧基戊酸甲酯	Others	其它类	Others	其它	C18H34O5	3	-	5.18597e+06	6.17516e+06	5.73361e+06	1.6291e+06	1.72643e+06	1.75725e+06	1.27866	0.00449079	0.026658	3.34353	1.74137	up
mws0206	2-Hydroxybutyric Acid*	2-羟基丁酸*	Organic acids	有机酸	Organic acids	有机酸	C4H8O3	3	3347-90-8	39183.2	23076.7	26567.4	59831.4	76585.2	80739.5	1.1913	0.00723578	0.0333746	0.409048	-1.28966	down
mws0574	2-Hydroxyisobutyric acid*	2-羟基异丁酸*	Organic acids	有机酸	Organic acids	有机酸	C4H8O3	3	594-61-6	27176.8	29955.6	30873.5	66240.7	71901.7	72637.5	1.27604	0.000315443	0.00789837	0.417525	-1.26006	down
Lcsn006335	2-Hydroxymyristic acid	2-羟基肉豆蔻酸	Organic acids	有机酸	Organic acids	有机酸	C14H28O3	3	2507-55-3	85294	80226.2	93861.9	36521.7	45581.6	39959.3	1.25707	0.00127778	0.0143245	2.12499	1.08746	up
pmb3101	2-Isopropylmalic Acid	2-异丙基苹果酸	Organic acids	有机酸	Organic acids	有机酸	C7H12O5	1	49601-06-1	302466	148396	184156	714505	825297	684086	1.21695	0.00114937	0.013595	0.285545	-1.80821	down
Lmhp010334	2-Linoleoylglycerol-1-O-glucoside	2-亚油酰甘油酯-1-O-葡萄糖苷	Lipids	脂质	Glycerol ester	甘油酯	C27H48O9	1	-	555.514	555.514	555.514	7880.33	7445.74	5547.55	1.27919	0.0122848	0.0458126	0.0798397	-3.64675	down
Wagp002530	2-Methoxy-1-benzofuran-5-carbaldehyde	2-甲氧基-1-苯并呋喃-5-甲醛	Others	其它类	Aldehyde compounds	醛类化合物	C10H8O3	1	-	390576	1.39124e+06	482336	112717	206900	262590	1.03016	0.219569	0.31173	3.88892	1.95937	up
MWS2069	2-Methoxy-4-methylphenol	2-甲氧基-4-甲基苯酚	Phenolic acids	酚酸类	Phenolic acids	酚酸类	C8H10O2	3	93-51-6	34622	38162	43751.7	250404	235196	279718	1.2788	0.00266577	0.0198844	0.152271	-2.71529	down
Lmgn002091	2-Methyl-3-oxoadipic acid*	2-甲基-3-氧代己二酸*	Organic acids	有机酸	Organic acids	有机酸	C7H10O5	3	-	71124.9	21443.6	115561	4288.72	4288.72	4288.72	1.19618	0.13897	0.222056	16.1765	4.01583	up
mws0924	2-Methylglutaric acid*	2-甲基戊二酸*	Organic acids	有机酸	Organic acids	有机酸	C6H10O4	3	617-62-9	546593	373593	474214	1.14947e+06	834413	1.01199e+06	1.20194	0.0131461	0.047111	0.46544	-1.10333	down
Wacn003131	2-O-P-Coumaroylhydroxycitric Acid	2-O-对香豆酰基羟基柠檬酸	Phenolic acids	酚酸类	Phenolic acids	酚酸类	C15H14O10	3	-	3588.91	3588.91	3588.91	23454	37257.5	17944.5	1.25382	0.0588017	0.122034	0.136883	-2.86898	down
Lmgn002184	2-Oxoheptanedionic acid*	2-氧庚二酸*	Organic acids	有机酸	Organic acids	有机酸	C7H10O5	3	17126-90-8	68309.8	13662	13662	97334.2	101555	146583	1.05242	0.0267385	0.0739197	0.276821	-1.85298	down
MWSslk106	2-Phenylethylamine	2-苯乙胺	Alkaloids	生物碱	Benzylphenylethylamine alkaloids	苄基苯乙胺类生物碱	C8H11N	3	156-28-5	155310	172577	106284	354259	356621	370791	1.22392	0.00568087	0.0295727	0.40139	-1.31692	down
Lmbp000728	2-Phenyloxirane	2-苯基环氧乙烷	Others	其它类	Others	其它	C8H8O	3	20780-54-5	1.11065e+07	1.17027e+07	9.61217e+06	4.47392e+07	3.81918e+07	3.80438e+07	1.2748	0.00332378	0.0221505	0.268001	-1.89969	down
mws2124	2-Phosphoglycolate	2-磷酸乙醇酸	Organic acids	有机酸	Organic acids	有机酸	C2H5O6P	3	13147-57-4	23960	45263	42314.5	124639	90651.1	108790	1.19008	0.00588222	0.0299233	0.344167	-1.53882	down
Zmgn001448	2-Propylmalic Acid*	2-丙基苹果酸*	Organic acids	有机酸	Organic acids	有机酸	C7H12O5	1	-	175147	253722	152812	593934	864472	802248	1.23676	0.0123791	0.0460752	0.257307	-1.95844	down
Lmbn002072	2-Propylsuccinic acid	2-丙基琥珀酸	Organic acids	有机酸	Organic acids	有机酸	C7H12O4	3	618-57-5	21951.3	20520.3	29798.3	70745.7	95428.6	122450	1.23461	0.0361919	0.0893444	0.250394	-1.99773	down
Walp007192	2-aminodocoSane-1,6,19,20,21-pentaol	2-氨基二十二烷-1,6,19,20,21-戊醇	Lipids	脂质	Sphingolipids	鞘脂	C22H47NO5	3	-	31102.3	31134.6	28943.7	124263	104129	93720.5	1.27226	0.0128591	0.0468395	0.283071	-1.82076	down
Lakn001671	2-β-D-Glucopyranosyloxy-5-hydroxy-phenylacetic acid	2-β-D-吡喃葡萄糖氧基-5-羟基苯乙酸	Phenolic acids	酚酸类	Phenolic acids	酚酸类	C14H18O9	1	-	726635	707214	616283	89871.2	89871.2	89871.2	1.28232	0.00326806	0.0218778	7.60397	2.92675	up
Lhkp101317	21,23-Epoxy-21,24,25-trihydroxylanost-7-en-3-one (Melianodiol)	21,23-环氧-21,24,25-三羟基羊毛甾-7-烯-3-酮 (苦楝子二醇)	Terpenoids	萜类	Triterpene	三萜	C30H48O5	3	32764-64-0	1659.17	1659.17	1659.17	8295.84	11396.6	10687.6	1.27641	0.0120508	0.0452902	0.163841	-2.60963	down
Lajp006634	3',5'-dihydroxy-5,7,4'-trimethoxyflavone-3'-(6''-malonylglucoside)	3',5'-二羟基-5,7,4'-三甲氧基黄酮-3'-(6''-丙二酰葡萄糖苷)	Flavonoids	黄酮	Flavones	黄酮	C27H28O15	3	-	1922.12	1922.12	1922.12	10779.2	20537.3	9610.59	1.2457	0.0773513	0.14578	0.140893	-2.82732	down
MW0112809	3'-Fucosyllactose	3'-岩藻糖半乳糖	Others	其它类	Saccharides	糖类	C18H32O15	3	41312-47-4	1.0248e+07	6.52471e+06	9.76184e+06	3.30906e+06	2.49816e+06	4.43307e+06	1.16778	0.0269268	0.0739197	2.5912	1.37362	up
Saln006297	3'-O-Caffeoyl Swertiamarin	3'-O-咖啡酰獐牙菜苦苷	Terpenoids	萜类	Monoterpenoids	倍萜	C25H28O13	2	-	16135.7	8293.28	9863.05	1658.66	1658.66	1658.66	1.25609	0.0551778	0.117941	6.89152	2.78482	up
Zbln006102	3,3'-O-Dimethylellagic Acid	3,3'-O-二甲基鞣花酸	Tannins	鞣质	Tannin	鞣质	C16H10O8	3	2239-88-5	338288	380375	474700	1.71883e+06	1.78476e+06	1.78296e+06	1.27258	7.03028e-05	0.00387268	0.225736	-2.14729	down
Zbfn003643	3,4,5-Trimethoxyphenol-β-D-apiofuranosyl-(1→6)-O-β-D-glucopyranoside	3,4,5-三甲氧基苯酚-β-D-芹糖基-(1→6)-O-β-D-葡萄糖苷	Others	其它类	Others	其它	C20H30O13	1	-	1.85011e+07	1.49066e+07	1.58886e+07	27154.8	15724.8	23691.4	1.28205	0.00424511	0.0260229	740.507	9.53237	up
Wayn006301	3,4-Dimethylellagic acid 4'-sulfate	3,4-二甲基鞣花酸 4'-磺酸基	Tannins	鞣质	Tannin	鞣质	C16H10O11S	3	-	81258.5	81883.5	108295	250510	239166	274175	1.25978	0.000306821	0.00789837	0.355354	-1.49267	down
Jmzn006005	3,4-methylenedioxy cinnamyl alcohol	3,4-亚甲二氧基肉桂醇	Others	其它类	Alcohol compounds	醇类化合物	C10H10O3	1	58095-76-4	541509	492850	465978	1.7663e+06	1.5871e+06	2.16285e+06	1.26881	0.0145646	0.0494376	0.271985	-1.8784	down
mws0914	3,5,7-Trihydroxyflavanone (Pinobanksin)*	3,5,7-三羟基黄烷酮 (短叶松素)*	Flavonoids	黄酮	Flavanonols	二氢黄酮醇	C15H12O5	3	548-82-3	37969.4	52017.9	38529.7	83873.9	83252.7	114551	1.20214	0.0241958	0.0693811	0.456255	-1.13209	down
Zahp006229	3-(2,3-dimethoxyphenyl)-N-(2-methoxybenzyl)acrylamide	3-(2,3-dimethoxyphenyl)-N-(2-methoxybenzyl)acrylamide	Alkaloids	生物碱	Alkaloids	生物碱	C19H21NO4	3	-	3.14157e+06	2.88994e+06	3.15357e+06	7.8555e+06	7.68427e+06	7.53638e+06	1.28115	3.44504e-06	0.000759414	0.398033	-1.32904	down
Wbjp001097	3-(2-amino-1-hydroxyethyl)-1H-indol-5-ol	3-(2-氨基-1-羟乙基)-1H-吲哚-5-醇	Alkaloids	生物碱	Alkaloids	生物碱	C10H12N2O2	3	40979-78-0	2.85457e+06	2.72252e+06	2.97789e+06	5.79383e+06	6.07459e+06	5.34346e+06	1.27315	0.00253538	0.0196314	0.497039	-1.00857	down
Zahp006491	3-(3,4-dimethoxyphenyl)-N-(2-methoxybenzyl)acrylamide	3-(3,4-dimethoxyphenyl)-N-(2-methoxybenzyl)acrylamide	Alkaloids	生物碱	Alkaloids	生物碱	C19H21NO4	3	-	2.99203e+06	3.03215e+06	2.62598e+06	7.33637e+06	7.20126e+06	7.56535e+06	1.2773	1.58557e-05	0.00160894	0.391357	-1.35344	down
Lmbn001676	3-Hydroxy-3-Methyl-2-Oxopentanoic Acid*	3-羟基-3-甲基-2-氧代戊酸*	Organic acids	有机酸	Organic acids	有机酸	C6H10O4	3	-	45130	46890.3	63989.5	122856	139278	104078	1.22133	0.00763754	0.0343946	0.42601	-1.23104	down
mws0576	3-Hydroxybutyric acid	3-羟基丁酸	Organic acids	有机酸	Organic acids	有机酸	C4H8O3	3	300-85-6	996257	982328	1.04642e+06	455848	503839	501136	1.27723	4.44061e-05	0.00285383	2.07075	1.05015	up
MWS3036	3-Hydroxyglutaric acid	3-羟基戊二酸	Organic acids	有机酸	Organic acids	有机酸	C5H8O5	3	638-18-6	39388	15852.5	29140.9	3170.51	3170.51	3170.51	1.2445	0.06711	0.132979	8.8715	3.14918	up
Lmqn008288	3-Hydroxyoctadecanoic Acid	3-羟基十八烷酸	Lipids	脂质	Free fatty acids	游离脂肪酸	C18H36O3	2	45261-96-9	607176	541185	525639	2.28067e+06	2.0732e+06	2.2954e+06	1.28001	0.000675382	0.0107265	0.251757	-1.9899	down
Lmbn001754	3-Isopropylmalic Acid*	3-异丙基苹果酸*	Organic acids	有机酸	Organic acids	有机酸	C7H12O5	1	921-28-8	288946	224012	326510	1.36826e+06	1.05904e+06	1.56411e+06	1.25814	0.0159555	0.0518094	0.210318	-2.24935	down
pmb0752	3-O-Feruloylquinic acid	3-O-阿魏酰奎宁酸	Phenolic acids	酚酸类	Phenolic acids	酚酸类	C17H20O9	1	1899-29-2	8.77693e+06	8.82081e+06	8.82715e+06	1.7316e+07	1.7407e+07	1.95377e+07	1.27627	0.00604541	0.0304323	0.486998	-1.03801	down
pmb2833	3-O-Feruloylquinic acid-O-glucoside*	3-O-阿魏酰奎宁酸-O-葡萄糖苷*	Phenolic acids	酚酸类	Phenolic acids	酚酸类	C23H30O14	1	-	723578	718074	559174	1.54863e+06	1.64431e+06	1.58938e+06	1.25972	0.000619599	0.010666	0.41838	-1.25711	down
Hmln000659	3-O-Galloyl-D-glucose*	3-O-没食子酰-D-葡萄糖*	Phenolic acids	酚酸类	Phenolic acids	酚酸类	C13H16O10	2	-	90273.5	100430	188410	243432	310664	248024	1.09708	0.0251503	0.0713085	0.472639	-1.08119	down
Lmmn004912	3-O-Methylquercetin	3-O-甲基槲皮素	Flavonoids	黄酮	Flavonols	黄酮醇	C16H12O7	3	1486-70-0	2823.07	2823.07	2823.07	25871.6	14115.3	30132.4	1.25307	0.0502599	0.110998	0.120783	-3.04951	down
Sadp006908	3-P-Coumaroyl-1-Feruloylglycerol	3-P-香豆酰-1-阿魏酰甘油	Phenolic acids	酚酸类	Phenolic acids	酚酸类	C22H22O8	1	-	350880	355002	435761	873383	981019	1.24242e+06	1.24475	0.0217182	0.0642219	0.368651	-1.43967	down
MA10107783	3-[(1-Carboxyvinyl)oxy]benzoic acid	3-[(1-羧乙烯基)氧基]苯甲酸	Phenolic acids	酚酸类	Phenolic acids	酚酸类	C10H8O5	3	16929-37-6	474288	403206	424936	847806	834113	991792	1.25835	0.00543515	0.0292709	0.487124	-1.03764	down
Wcdn001780	3-methoxy-4-[3,4,5-trihydroxy-6-(sulfooxymethyl)oxan-2-yl]oxybenzoic acid	3-methoxy-4-[3,4,5-trihydroxy-6-(sulfooxymethyl)oxan-2-yl]oxybenzoic acid	Others	其它类	Others	其它	C14H18O12S	3	-	1.43698e+06	1.15425e+06	1.24248e+06	2.52296e+06	2.70909e+06	3.03745e+06	1.25448	0.00282267	0.0201381	0.463597	-1.10906	down
Lsjp211201	3S-3-hydroxy-β-damascon	3S-3-羟基-β-突厥酮	Terpenoids	萜类	Monoterpenoids	倍萜	C13H20O2	1	-	6349.1	31745.5	6349.1	51065.5	81440.4	49703.5	1.07062	0.0281503	0.075485	0.243916	-2.03555	down
MWSHY0169	4',5,7-Trihydroxy-3',6-dimethoxyflavone (Jaceosidin)	4',5,7-三羟基-3',6-二甲氧基黄酮 (棕矢车菊素)	Flavonoids	黄酮	Flavones	黄酮	C17H14O7	3	18085-97-7	1933.8	1933.8	1933.8	13428.3	14499.8	16305.1	1.28194	0.00426601	0.0260229	0.131155	-2.93066	down
Lmsn000842	4,6-(S)-Hexahydroxydiphenoyl-β-D-glucose	4,6-(S)-六羟基二苯甲酰基-β-D-葡萄糖	Phenolic acids	酚酸类	Phenolic acids	酚酸类	C20H18O14	3	36378-48-0	98126.3	66955.4	152067	290383	373739	289467	1.17612	0.00496072	0.0277848	0.332584	-1.58821	down
Wcfn006909	4,6-Dihydroxy-2-[(4-Hydroxy-3,5-Dimethoxyphenyl)Methylidene]-1-Benzofuran-3-One	4,6-Dihydroxy-2-[(4-Hydroxy-3,5-Dimethoxyphenyl)Methylidene]-1-Benzofuran-3-One	Others	其它类	Others	其它	C17H14O7	3	-	420307	417460	368532	2.06692e+06	1.8671e+06	1.85345e+06	1.28083	0.00122731	0.0140015	0.208433	-2.26235	down
Lmgp001898	4,6-Dihydroxyquinoline	4,6-二羟基喹啉	Alkaloids	生物碱	Quinoline alkaloids	喹啉类生物碱	C9H7NO2	3	3517-61-1	14891.1	2978.22	2978.22	21880.4	21684.1	26120.2	1.04578	0.0418069	0.0982971	0.29917	-1.74096	down
MWSmce644	4-Acetoxy-3-Ethoxybenzaldehyde	4-乙酰氧基-3-乙氧基苯甲醛	Others	其它类	Aldehyde compounds	醛类化合物	C11H12O4	3	72207-94-4	5157.15	5044.58	6835.22	29804	33147.3	19899.5	1.25008	0.0291648	0.0769217	0.205634	-2.28185	down
mws0628	4-Hydroxybenzaldehyde	4-羟基苯甲醛	Others	其它类	Aldehyde compounds	醛类化合物	C7H6O2	1	123-08-0	413024	417735	470590	1.0831e+06	1.20221e+06	1.3265e+06	1.27128	0.0055357	0.0295646	0.360304	-1.47271	down
MWS5206	4-Hydroxyphenyllactic Acid*	4-羟苯基乳酸*	Phenolic acids	酚酸类	Phenolic acids	酚酸类	C9H10O4	3	306-23-0	57328.5	46119.1	32431.2	22440.5	13729.5	27432.7	1.05903	0.0581783	0.121553	2.13637	1.09516	up
MWSHC2035	4-Methoxycinnamic acid	4-甲氧基肉桂酸	Phenolic acids	酚酸类	Phenolic acids	酚酸类	C10H10O3	3	830-09-1	171402	152906	155162	796059	692594	861411	1.27865	0.00561445	0.0295727	0.204025	-2.29318	down
pmb0764	4-Methyl-5-thiazoleethanol	4-甲基-5-噻唑乙醇	Others	其它类	Others	其它	C6H9NOS	3	137-00-8	630970	509862	591594	3.17639e+06	2.52271e+06	2.6275e+06	1.27485	0.00700346	0.0327735	0.208059	-2.26493	down
Lamp000484	4-Methylazetidine-2-Carboxylic acid	4-甲基吖啶-2-羧酸	Alkaloids	生物碱	Alkaloids	生物碱	C5H9NO2	1	1779725-63-1	1.93176e+07	2.08793e+07	2.11641e+07	7.46089e+06	7.46175e+06	7.14002e+06	1.28149	0.00141091	0.0144693	2.78122	1.47572	up
mws0566	4-Methylcatechol	4-甲基儿茶酚	Phenolic acids	酚酸类	Phenolic acids	酚酸类	C7H8O2	3	452-86-8	2.81973e+06	2.60963e+06	4.99895e+06	2002.93	2002.93	2002.93	1.28199	0.045096	0.102449	1735.51	10.7611	up
Lhnn101215	4-Methylsulfinyl-3-Butenyl Glucosinolate	4-甲基亚磺酰基-3-丁烯基硫苷	Others	其它类	Glucosinolates	硫苷类	C12H21NO10S3	3	28463-24-3	7426.02	7426.02	7426.02	1.65957e+06	1.50789e+06	2.43073e+06	1.28217	0.0228241	0.0665113	0.00397952	-7.97319	down
Wcdp006929	4-Oxo-9,11,13,15-Octadecatetraenoic Acid	4-氧-9,11,13,15-十八碳四烯酸	Lipids	脂质	Free fatty acids	游离脂肪酸	C18H26O3	3	17699-21-7	6904.76	9590.51	5554.33	48847.8	51795.6	38629.6	1.25987	0.00646832	0.0315719	0.158319	-2.65909	down
pmb0885	4-Oxo-9Z,11Z,13E,15E-Octadecatetraenoic Acid	4-氧化-9Z,11Z,13E,15E-十八碳四烯酸	Lipids	脂质	Free fatty acids	游离脂肪酸	C18H26O3	3	-	5077.78	2705.4	1362.9	27764.6	15832.9	13597.1	1.16899	0.0603684	0.123688	0.159912	-2.64465	down
Wcsn010254	4-[3-(4,8-dimethylnona-3,7-dienyl)-3-methyloxiran-2-yl]butan-2-one	4-[3-(4,8-二甲基壬-3,7-二苯基)-3-甲基环氧乙烷-2-基]丁-2-酮	Others	其它类	Others	其它	C18H30O2	1	-	1.5501e+07	1.445e+07	1.41089e+07	3.15471e+07	2.88663e+07	3.13943e+07	1.27643	0.000608703	0.0105728	0.479915	-1.05915	down
Zaln004057	4-caffeoylshikimic acid*	4-咖啡酰莽草酸*	Phenolic acids	酚酸类	Phenolic acids	酚酸类	C16H16O8	1	-	1.59017e+06	1.53545e+06	1.67495e+06	654943	883646	853213	1.23747	0.00183577	0.0166167	2.00709	1.00511	up
MWSHC20105	4-ketopinoresinol	4-酮基松脂酚	Lignans and Coumarins	木脂素和香豆素	Lignans	木脂素	C20H20O7	1	66288-89-9	136152	203215	132672	333078	365652	303038	1.19765	0.00448661	0.026658	0.471206	-1.08557	down
ZbWn007974	4-methylbenzenesulfonic (11E,14E)-octadeca-11,14,17-trienoic anhydride	4-甲基苯磺酸(11E,14E)-十八碳-11,14,17-三烯酸酐	Others	其它类	Others	其它	C25H36O4S	3	-	146099	177370	142807	302367	317964	339283	1.25618	0.000432635	0.00908816	0.4859	-1.04127	down
pme1474	5'-Deoxy-5'-(methylthio)adenosine	5-脱氧-5-甲硫腺苷	Nucleotides and derivatives	核苷酸及其衍生物	Nucleotides and derivatives	核苷酸及其衍生物	C11H15N5O3S	1	2457-80-9	6.53461e+06	6.21859e+06	6.38153e+06	1.52601e+07	1.41219e+07	1.36647e+07	1.2791	0.00266519	0.0198844	0.444511	-1.16971	down
MWSmce116	5'-Deoxyadenosine*	5-脱氧腺嘌呤核苷*	Nucleotides and derivatives	核苷酸及其衍生物	Nucleotides and derivatives	核苷酸及其衍生物	C10H13N5O3	3	4754-39-6	551055	730976	565082	1.47335e+06	1.46284e+06	1.79698e+06	1.24877	0.00429188	0.0260229	0.390249	-1.35753	down
Hmln002355	5'-Methoxymatairesinoside*	5'-甲氧基罗汉松脂苷*	Lignans and Coumarins	木脂素和香豆素	Lignans	木脂素	C27H34O12	3	1691201-82-7	5609.12	5609.12	5609.12	37859.6	28045.6	40663.6	1.27432	0.015962	0.0518094	0.157901	-2.6629	down
MW0014593	5,6-EET Methyl Ester	5（6)-EET甲酯	Lipids	脂质	Free fatty acids	游离脂肪酸	C21H34O3	3	122799-12-6	44206.8	44206.8	44206.8	290526	221034	346501	1.27145	0.0217878	0.064329	0.154558	-2.69378	down
Zmhn001420	5,7-Dihydroxy-1(3H)-isobenzofuranone*	5,7-二羟基-1(3H)-异苯并呋喃酮*	Phenolic acids	酚酸类	Phenolic acids	酚酸类	C8H6O4	1	27979-58-4	2.10769e+06	1.39136e+06	2.23675e+06	4.9572e+06	3.28194e+06	4.34531e+06	1.15546	0.0250329	0.0710802	0.455785	-1.13358	down
Xmyn008071	5,7-dihydroxy-2-(3-hydroxyphenyl)-3-methoxy-4H-chromen-4-one*	5,7-二羟基-2-(3-羟基苯基)-3-甲氧基-4H-苯并吡喃-4-酮*	Flavonoids	黄酮	Flavonols	黄酮醇	C16H12O6	3	140671-06-3	133051	125809	96162.8	181005	245952	354061	1.11327	0.100104	0.173875	0.454564	-1.13744	down
Lmqn009304	5-Hydroxy-7,4'-dimethoxy-6,8-dimethylflavone; Eucalyptin	5-羟基-7,4'-二甲氧基-6,8-二甲基黄酮; 桉树素	Flavonoids	黄酮	Flavones	黄酮	C19H18O5	3	3122-88-1	258945	278955	260372	636904	663307	744180	1.27595	0.00461812	0.0271455	0.390469	-1.35672	down
MW0115996	5-Methyltetrahydrofolic acid	5-甲基四氢叶酸	Organic acids	有机酸	Organic acids	有机酸	C20H25N7O6	3	31690-09-2	72949	58161.1	61422	123801	129428	147246	1.25038	0.00231364	0.0183582	0.48076	-1.05661	down
pmb2554	5-O-Feruloyl quinic acid glucoside*	5-O-阿魏酰奎宁酸葡萄糖苷*	Phenolic acids	酚酸类	Phenolic acids	酚酸类	C23H30O14	1	-	865650	609048	618768	1.37137e+06	1.61884e+06	1.31317e+06	1.20834	0.00440686	0.0264686	0.486469	-1.03958	down
Zmhn001703	5-O-Galloyl-D-hamamelose*	5-O-没食子酰-D-金缕梅糖*	Phenolic acids	酚酸类	Phenolic acids	酚酸类	C13H16O10	2	-	18557.7	18557.7	18557.7	298633	215728	260075	1.28077	0.00984701	0.0398845	0.0718886	-3.79809	down
Zahn007990	5-hydroxy-3,4-dimethyl-5-pentylfuran-2(5H)-one	5-羟基-3,4-二甲基-5-戊基呋喃-2(5H)-酮	Others	其它类	Lactones	内酯类化合物	C11H18O3	1	-	77006.8	104894	95628.9	294102	266462	251023	1.26129	0.000661571	0.0107265	0.341958	-1.54811	down
Wcfp005519	5-hydroxyindene-1,3-dione	5-羟基茚-1,3-二酮	Terpenoids	萜类	Sesquiterpenoids	倍半萜	C9H6O3	1	131977-61-2	254388	326165	321602	1.77757e+06	1.56832e+06	1.32163e+06	1.27093	0.00918146	0.0384666	0.193283	-2.37121	down
Lacn007285	6'''-O-AcetylAmurensin	6'''-O-乙酰基去氢黄柏苷	Flavonoids	黄酮	Flavonols	黄酮醇	C28H30O12	3	-	1.34793e+06	1.26863e+06	1.35884e+06	1542.52	1542.52	1542.52	1.28392	0.000460949	0.00910711	859.068	9.74663	up
Wadp011034	6,7-Dioxo-pimara-8,15-dien	6,7-Dioxo-pimara-8,15-dien	Terpenoids	萜类	Ditepenoids	二萜	C20H28O2	3	-	53936.5	44934.2	46315	139741	133124	125220	1.27367	0.000188451	0.00648809	0.36471	-1.45518	down
Latp004399	6,8-Dihydroxy-3-methylisocoumarin	6,8-二羟基-3-甲基异香豆素	Lignans and Coumarins	木脂素和香豆素	Coumarins	香豆素	C10H8O4	3	1204-37-1	1903.01	1903.01	1903.01	9515.03	78380.1	79403.3	1.16278	0.145244	0.229534	0.0341247	-4.87304	down
Wbtn006721	6,8-dihydroxy-3-methyl-9-oxoxanthene-1-carboxylic acid	6,8-二羟基-3-甲基-9-氧杂蒽-1-羧酸	Others	其它类	Ketone compounds	酮类化合物	C15H10O6	3	-	12757.8	6383.82	7276.7	29509.4	16053.6	31877.8	1.1198	0.0589681	0.122039	0.341142	-1.55156	down
Lmln007483	6,9,10-Trihydroxyoctadec-7-enoic acid; Sanleng acid	6,9,10-三羟基十八碳-7-烯酸; 三棱酸	Lipids	脂质	Free fatty acids	游离脂肪酸	C18H34O5	3	-	5.70775e+06	6.57959e+06	5.39262e+06	1.66213e+06	1.91764e+06	1.80129e+06	1.27474	0.00570594	0.0295727	3.28558	1.71615	up
Zmhp102730	6-Hydroxykaempferol-3,6-O-Diglucoside	6-羟基山柰酚-3,6-O-二葡萄糖苷	Flavonoids	黄酮	Flavonols	黄酮醇	C27H30O17	2	-	832.717	832.717	832.717	4163.58	8298.79	11144.5	1.23953	0.0738839	0.141599	0.105823	-3.24027	down
Zmjp004795	6-Hydroxywogonin*	6-羟基黄芩素*	Flavonoids	黄酮	Flavones	黄酮	C16H12O6	3	-	25719.2	28537.4	30182.6	60264.1	64468	88288.6	1.23712	0.0365199	0.0900388	0.396389	-1.33501	down
Wdsp002909	6-[(7-hydroxy-2-methyl-6-oxo-3,4-dihydroisoquinolin-1-yl)methyl]-2,3-dimethoxybenzoic acid	6-[(7-羟基-2-甲基-6-氧代-3,4-二氢异喹啉-1-基)甲基]-2,3-二甲氧基苯甲酸	Alkaloids	生物碱	Isoquinoline alkaloids	异喹啉类生物碱	C20H21NO6	3	-	192729	202238	174756	67000.4	28688.6	66479.8	1.17917	0.0017344	0.0159997	3.51314	1.81276	up
Zaxn005821	7,13,15-Abietatrienoic acid*	7,13,15-枞三烯酸*	Terpenoids	萜类	Ditepenoids	二萜	C20H28O2	1	-	255082	229968	220751	633280	578826	641139	1.27623	0.000405241	0.00904522	0.380846	-1.39272	down
Cmsp008121	7-O-Methylnaringenin	7-甲基柚皮素	Flavonoids	黄酮	Flavanones	二氢黄酮	C16H14O5	3	-	456.813	456.813	456.813	3787.3	4125.7	2284.07	1.26203	0.0350687	0.0873546	0.134395	-2.89544	down
Wadp008483	7-Oxo-3-hydroxy-6,18-epoxypimara-15-en-18-one	7-Oxo-3-hydroxy-6,18-epoxypimara-15-en-18-one	Terpenoids	萜类	Ditepenoids	二萜	C20H28O4	3	-	6535.01	7507.17	8283.46	43377	35338.9	26283.7	1.25662	0.0295361	0.0775717	0.212626	-2.23361	down
Lmbn005287	7S,8S-DiHODE; (9Z,12Z)-(7S,8S)-Dihydroxyoctadeca-9,12-dienoic acid*	7,8-二羟基-9,12-十八碳二烯酸*	Lipids	脂质	Free fatty acids	游离脂肪酸	C18H32O4	3	143288-65-7	55429.8	47073.5	51053.3	23124.3	24418.8	28861.6	1.25033	0.00149482	0.0147796	2.00978	1.00704	up
Lmmn006246	7β-Hydroxydarutigenol	7β-羟基豨莶精醇	Terpenoids	萜类	Ditepenoids	二萜	C20H34O4	3	1188281-99-3	63778.2	61197.2	69789.8	144898	159855	143890	1.27419	0.000790235	0.010961	0.43412	-1.20384	down
MW0015274	8,11,14-Eicosatriynoic Acid	8,11,14-二十碳三烯酸	Lipids	脂质	Free fatty acids	游离脂肪酸	C20H28O2	3	34262-64-1	771927	783160	776721	2.07786e+06	2.19532e+06	2.02877e+06	1.28243	0.00133475	0.0143245	0.370014	-1.43435	down
Wcsn010524	8,11-Heptadecadienoic acid	8,11-十七碳二烯酸	Lipids	脂质	Free fatty acids	游离脂肪酸	C17H30O2	1	-	238475	202589	216095	482627	443144	437098	1.26901	0.000309877	0.00789837	0.482188	-1.05233	down
MWSHC20110	8-Methoxyapigenin*	8-甲氧基芹菜素*	Flavonoids	黄酮	Flavones	黄酮	C16H12O6	3	57096-02-3	37261.8	26952.4	34354.5	67599.3	68116	89345.8	1.22175	0.0160226	0.0519185	0.437964	-1.19112	down
Hmqn003054	9,10,11-Trihydroxy-12-octadecenoic acid	9,10,11-三羟基-12-十八碳烯酸	Lipids	脂质	Free fatty acids	游离脂肪酸	C18H34O5	3	61911-67-9	308367	301261	304639	87804.6	81563.3	80392.7	1.28269	2.64697e-07	0.0002718	3.66058	1.87207	up
pmn001694	9,10,13-Trihydroxy-11-Octadecenoic Acid	9,10,13-三羟基-11-十八碳烯酸	Lipids	脂质	Free fatty acids	游离脂肪酸	C18H34O5	1	29907-57-1	3.10001e+06	3.37591e+06	3.86995e+06	722002	926533	847214	1.27227	0.00483188	0.0274804	4.1454	2.05151	up
Lmbn003970	9,12,13-TriHOME; 9(S),12(S),13(S)-Trihydroxy-10(E)-octadecenoic acid	9(S),12(S),13(S)-三羟基-10(E)-十八烯酸	Lipids	脂质	Free fatty acids	游离脂肪酸	C18H34O5	1	97134-11-7	5.37217e+06	5.77547e+06	4.73905e+06	1.33773e+06	1.2584e+06	1.24057e+06	1.27903	0.00523412	0.0287504	4.14071	2.04988	up
mws1060	9-(Arabinosyl)hypoxanthine	9-(阿拉伯糖基)次黄嘌呤	Nucleotides and derivatives	核苷酸及其衍生物	Nucleotides and derivatives	核苷酸及其衍生物	C10H12N4O5	1	7013-16-3	275212	363881	414356	824737	686733	878029	1.21499	0.0043773	0.0263732	0.440866	-1.18159	down
Wcjp001032	9-[(2S,3S,4S,5R)-3,4-dihydroxy-5-(hydroxymethyl)oxolan-2-yl]-1H-purin-6-one	9-[(2S,3S,4S,5R)-3,4-dihydroxy-5-(hydroxymethyl)oxolan-2-yl]-1H-purin-6-one	Alkaloids	生物碱	Alkaloids	生物碱	C10H12N4O5	3	-	641467	657426	654468	1.27961e+06	1.59141e+06	1.60495e+06	1.2632	0.0154398	0.0509957	0.436411	-1.19624	down
Smjp001258	Abrine	相思豆碱 (N-甲基-L-色氨酸)	Amino acids and derivatives	氨基酸及其衍生物	Amino acids and derivatives	氨基酸及其衍生物	C12H14N2O2	3	526-31-8	1713.67	9929.92	1713.67	12409.9	15951.9	23719.7	1.03824	0.0423763	0.0991288	0.256468	-1.96315	down
Lmtn004049	Abscisic acid	脱落酸	Terpenoids	萜类	Sesquiterpenoids	倍半萜	C15H20O4	1	21293-29-8	6587.91	8023.62	3165.16	633.032	633.032	633.032	1.24217	0.066797	0.132835	9.3606	3.2266	up
Zbbn005905	Abyssinone II	Abyssinone II	Flavonoids	黄酮	Flavanones	二氢黄酮	C20H20O5	3	-	61222.9	31529.4	41944.3	81749.2	126651	93562.7	1.12015	0.0324191	0.0827868	0.446071	-1.16466	down
pme1173	Allopurinol	别嘌呤醇	Nucleotides and derivatives	核苷酸及其衍生物	Nucleotides and derivatives	核苷酸及其衍生物	C5H4N4O	3	315-30-0	129638	137841	113738	264235	245723	264132	1.26514	0.00017172	0.00630342	0.492471	-1.02189	down
Lmqp002761	Alnusonol	赤杨醇	Phenolic acids	酚酸类	Phenolic acids	酚酸类	C19H20O4	3	52330-12-8	160334	158628	123257	24651.4	24651.4	24651.4	1.27802	0.0095529	0.0393307	5.97963	2.58006	up
Zbbp001820	Anabasine	新烟碱	Alkaloids	生物碱	Pyridine alkaloids	吡啶类生物碱	C10H14N2	3	13078-04-1	97646.6	191152	97808.2	398693	376849	424210	1.19916	0.00564606	0.0295727	0.322239	-1.6338	down
pmb2654	Anthranilate-1-O-Sophoroside	邻氨基苯甲酸-1-O-槐糖苷	Phenolic acids	酚酸类	Phenolic acids	酚酸类	C19H27NO12	3	-	522829	604026	584709	256785	195212	261983	1.24911	0.000564797	0.00999017	2.39722	1.26136	up
pmb0613	Apigenin-6,8-di-C-glucoside-4'-O-glucoside	芹菜素-6,8-二-C-葡萄糖苷-4'-O-葡萄糖苷	Flavonoids	黄酮	Flavones	黄酮	C33H40O20	2	-	1107.06	1107.06	1107.06	5536.29	9752.8	11064.3	1.25634	0.0440848	0.101091	0.126025	-2.98822	down
Lmhn004976	Aracarpene 2	9-甲氧基-6H-[1]苯并呋喃[3,2-c]色烯-3,4,7-三醇	Flavonoids	黄酮	Isoflavones	异黄酮	C16H12O6	3	-	110306	120413	123833	225062	346592	223976	1.20048	0.067403	0.133285	0.445623	-1.1661	down
mws0369	Arachidonic Acid	花生四烯酸	Lipids	脂质	Free fatty acids	游离脂肪酸	C20H32O2	2	506-32-1	54071.2	60296.5	58396.7	105309	151310	129735	1.23707	0.0310804	0.0803257	0.447167	-1.16112	down
MW0145516	Arg-Thr-Gly	精氨酰-苏氨酰-甘氨酸	Amino acids and derivatives	氨基酸及其衍生物	Amino acids and derivatives	氨基酸及其衍生物	C12H24N6O5	3	-	8719.76	8719.76	8719.76	113587	43598.8	64449.6	1.23997	0.0881765	0.159479	0.118028	-3.08279	down
MW0105791	Asn-Pro-Lys	天冬酰胺-脯氨酰-赖氨酸	Amino acids and derivatives	氨基酸及其衍生物	Amino acids and derivatives	氨基酸及其衍生物	C15H27N5O5	3	-	648737	889820	887053	31150.4	20504.7	18175.4	1.27636	0.0100544	0.0404693	34.7357	5.11835	up
mws1627	Bengenin	岩白菜素	Phenolic acids	酚酸类	Phenolic acids	酚酸类	C14H16O9	3	477-90-7	208171	177703	214542	384202	491287	390069	1.24067	0.0161895	0.0521963	0.474427	-1.07574	down
pmb0069	Benzamide	苯甲酰胺	Alkaloids	生物碱	Alkaloids	生物碱	C7H7NO	3	55-21-0	189065	179521	154460	362525	351898	346313	1.26486	0.000787362	0.010961	0.493097	-1.02006	down
Jmlp004238	Byzantionoside A	Byzantionoside A	Others	其它类	Ketone compounds	酮类化合物	C19H30O7	3	189109-41-9	551288	494891	573209	6607.8	6607.8	6607.8	1.28369	0.00190863	0.0167626	81.6907	6.3521	up
Sayn008070	Caesalbonducin ID	Caesalbonducin ID	Terpenoids	萜类	Ditepenoids	二萜	C26H38O9	3	-	51683.5	37366	48947.3	100914	91409.1	92127	1.23434	0.00133765	0.0143245	0.485134	-1.04354	down
pma0101	Caffeoylagmatine	咖啡酰胍丁胺	Alkaloids	生物碱	Phenolamine	酚胺	C14H20N4O3	3	-	978221	753653	833426	2.18585e+06	1.81317e+06	1.75435e+06	1.24514	0.00651557	0.0317223	0.445877	-1.16528	down
Hmcp009963	Candicine	N-甲基大麦芽碱	Alkaloids	生物碱	Phenolamine	酚胺	C11H18NO+	3	6656-13-9	174740	180295	233728	503130	442457	419196	1.24497	0.00160293	0.0151492	0.431397	-1.21291	down
HJN016	Cannabisin D	大麻酰胺 D	Alkaloids	生物碱	Alkaloids	生物碱	C36H36N2O8	3	-	28291.3	40312.1	26139.6	790147	961267	696381	1.27748	0.00945725	0.0392201	0.0387054	-4.69132	down
pmp001253	Cannabisin F	大麻酰胺 F	Alkaloids	生物碱	Phenolamine	酚胺	C36H36N2O8	3	163136-19-4	10315.9	13770.4	13361	626036	632889	661518	1.28248	0.000264032	0.00716976	0.0194993	-5.68043	down
Zaqn006922	Chaetomugilin A	Chaetomugilin A	Others	其它类	Others	其它	C23H27ClO7	3	1041640-66-7	56228.5	66270.7	62904.5	322803	326048	305468	1.28127	7.48214e-05	0.0040071	0.194279	-2.3638	down
pmp001142	Cimicifugamide A	升麻酰胺 A	Alkaloids	生物碱	Phenolamine	酚胺	C24H29NO10	3	-	61710.7	50209.4	42352.2	149645	123630	81308.3	1.14049	0.0691169	0.135596	0.435079	-1.20065	down
Wbmp002549	Cimicifugic acid A-Diglucose	升麻酸A-二葡萄糖	Phenolic acids	酚酸类	Phenolic acids	酚酸类	C33H40O21	3	-	25715.1	43368.1	21692.1	2579.23	2579.23	2579.23	1.26539	0.0532623	0.115252	11.7316	3.55233	up
MWS0550	Cinnamaldehyde	肉桂醛	Phenolic acids	酚酸类	Phenolic acids	酚酸类	C9H8O	3	14371-10-9	10990.2	75127.8	59401.2	2198.03	2198.03	2198.03	1.17966	0.138502	0.221788	22.0681	4.46389	up
Lmmn004032	Cis-Jasmone	顺式-茉莉酮	Others	其它类	Ketone compounds	酮类化合物	C11H16O	3	488-10-8	22577.1	20696.4	10666.2	37270.8	43303.4	32599.3	1.08234	0.0158737	0.0518094	0.47661	-1.06912	down
Hmyn005972	Coixenolide	薏苡仁酯	Lipids	脂质	Free fatty acids	游离脂肪酸	C38H70O4	3	-	800.684	800.684	800.684	5586.4	8885.82	4114.72	1.25259	0.0620661	0.125565	0.129233	-2.95195	down
mws1715	Cordycepin (3'-Deoxyadenosine)*	虫草素(3'-脱氧腺苷)*	Nucleotides and derivatives	核苷酸及其衍生物	Nucleotides and derivatives	核苷酸及其衍生物	C10H13N5O3	3	73-03-0	514458	542301	432537	1.20983e+06	970699	1.22759e+06	1.24667	0.0086524	0.0369885	0.436984	-1.19435	down
Lmbn005923	Crepenynic acid	顺式十八碳-9-烯-12-炔酸	Lipids	脂质	Free fatty acids	游离脂肪酸	C18H30O2	1	2277-31-8	235759	210735	220228	459781	429970	466770	1.27556	0.000194703	0.00652516	0.491494	-1.02475	down
MWSmce449	Cyclohexaneacetic acid	环己基乙酸	Organic acids	有机酸	Organic acids	有机酸	C8H14O2	3	5292-21-7	1.27332e+07	9.7851e+06	1.44351e+07	1.55148e+06	5.31889e+06	1.78596e+06	1.14579	0.0068704	0.032434	4.26895	2.09388	up
mws4170	D-Glucose*	D-葡萄糖*	Others	其它类	Saccharides	糖类	C6H12O6	3	50-99-7	2.0381e+06	1.70384e+06	1.69102e+06	743337	915064	578756	1.22165	0.00224223	0.0182034	2.42851	1.28007	up
MWS1709	D-Malic acid*	D-苹果酸*	Organic acids	有机酸	Organic acids	有机酸	C4H6O5	1	636-61-3	8.92734e+06	3.77105e+06	4.13596e+06	2.469e+06	2.54715e+06	2.08037e+06	1.04586	0.189081	0.277345	2.3722	1.24622	up
pmf0138	D-Mannose*	甘露糖*	Others	其它类	Saccharides	糖类	C6H12O6	3	3458-28-4	1.93722e+06	1.58156e+06	1.44999e+06	794189	730184	812555	1.2467	0.0237225	0.0684684	2.1262	1.08827	up
pme1261	D-Panthenol	D-泛酰醇	Others	其它类	Alcohol compounds	醇类化合物	C9H19NO4	3	81-13-0	7088.58	8148.25	9407.05	29388.3	23512.1	30563.6	1.26164	0.00767294	0.0344033	0.295264	-1.75992	down
pmb0064	DIMBOA glucoside	2,4-二羟基-7-甲氧基-1,4-苯并恶嗪-3-酮 葡糖苷	Alkaloids	生物碱	Alkaloids	生物碱	C15H19NO10	3	18607-79-9	5.55193e+06	6.00678e+06	4.69749e+06	1.23149e+07	1.14024e+07	1.13284e+07	1.25904	0.000281524	0.00753858	0.463857	-1.10825	down
MWS0274	DL-3-Phenyllactic acid	DL-3-苯基乳酸	Organic acids	有机酸	Organic acids	有机酸	C9H10O3	3	828-01-3	27196.8	39010.2	28428.3	50329.2	57771.6	84141.4	1.12583	0.0727338	0.140301	0.492272	-1.02247	down
pme3186	DL-Glyceraldehyde-3-phosphate	DL-甘油醛-3-磷酸	Organic acids	有机酸	Organic acids	有机酸	C3H7O6P	3	591-59-3	97537.2	111287	121149	182917	213066	272396	1.20022	0.0427412	0.0994564	0.493692	-1.01832	down
Cmyp009787	Damascenone	大马酮	Others	其它类	Ketone compounds	酮类化合物	C13H20O	3	23726-91-2	9846.72	9119.94	9006.19	27146.8	25371.3	25289.8	1.28085	0.000260404	0.00716976	0.359512	-1.47589	down
Cmyn001328	Daphnin	瑞香苷	Lignans and Coumarins	木脂素和香豆素	Coumarins	香豆素	C15H16O9	3	486-55-5	3298.83	18753.7	3298.83	26428.1	27634.7	23870.9	1.01009	0.0706033	0.137498	0.325295	-1.62018	down
Cmmn012461	Dehydroabietic acid	脱氢松香酸	Terpenoids	萜类	Ditepenoids	二萜	C20H28O2	3	1740-19-8	590721	531687	582683	1.68288e+06	1.62461e+06	1.63457e+06	1.28131	1.96808e-06	0.00063241	0.345016	-1.53526	down
Hmsn002272	Demethyl coniferin	去甲松柏苷	Others	其它类	Alcohol compounds	醇类化合物	C15H20O8	3	-	639517	508170	655040	1.14255e+06	1.23525e+06	1.32446e+06	1.24491	0.000893156	0.0116352	0.486926	-1.03823	down
Lmfp005484	Demissine	垂茄碱	Alkaloids	生物碱	Steroid alkaloids	甾体类生物碱	C50H83NO20	3	6077-69-6	90332.3	102122	111834	6817.25	6817.25	6817.25	1.28263	0.00428944	0.0260229	14.8783	3.89514	up
MW0103525	Deoxyuridine-5'-diphosphate	脱氧尿苷-5'-二磷酸	Nucleotides and derivatives	核苷酸及其衍生物	Nucleotides and derivatives	核苷酸及其衍生物	C9H14N2O11P2	3	4208-67-7	4544.19	4544.19	4544.19	26140.5	22721	23425.8	1.28236	0.00283062	0.0201381	0.188589	-2.40668	down
Wbmp003570	Diacetate delcosine	二乙酰基硬飞燕草次碱	Alkaloids	生物碱	Alkaloids	生物碱	C28H43NO9	3	-	1.21705e+06	1.11708e+06	1.0187e+06	2.70814e+06	2.13759e+06	1.93743e+06	1.22289	0.0322179	0.0824416	0.494287	-1.01658	down
MWSmce539	Dibutyl sebacate	癸二酸二丁酯	Lipids	脂质	Free fatty acids	游离脂肪酸	C18H34O4	3	109-43-3	22212.9	18321.1	19865	67273.2	66421.9	75868	1.27599	0.00137681	0.0143486	0.288214	-1.79479	down
Cmyp007180	Dihydroactinidiolide	二氢猕猴桃内酯	Terpenoids	萜类	Terpene	萜类	C11H16O2	3	15356-74-8	18505.4	12414.9	19761.7	149519	70843.3	69198.8	1.21451	0.0941646	0.167101	0.175031	-2.51432	down
Lmmp002013	Dihydroferuloylputrescine	二氢阿魏酰腐胺	Alkaloids	生物碱	Phenolamine	酚胺	C14H22N2O3	3	-	1.80702e+06	2.08988e+06	2.04188e+06	4.09011e+06	4.22144e+06	3.97072e+06	1.27259	6.26562e-05	0.00355297	0.483525	-1.04834	down
MWSslk097	Dimethyl phthalate	邻苯二甲酸二甲酯	Phenolic acids	酚酸类	Phenolic acids	酚酸类	C10H10O4	3	131-11-3	272410	375386	280250	2.10591e+06	1.64108e+06	1.42362e+06	1.26387	0.0175236	0.0552955	0.179485	-2.47807	down
MW0011908	Dioleoyl phosphatidylserine	1,2-二油酰基-sn-甘油-3-磷酸-L-丝氨酸	Lipids	脂质	Glycerol ester	甘油酯	C42H78NO10P	3	-	6259.75	5623.32	5136.86	63593.6	49435.4	44471.5	1.27656	0.0144104	0.0492609	0.108063	-3.21006	down
mws0058	Diosmetin (5,7,3'-Trihydroxy-4'-methoxyflavone)*	香叶木素*	Flavonoids	黄酮	Flavones	黄酮	C16H12O6	3	520-34-3	74975.9	82097.1	89517.6	197766	268887	228126	1.259	0.0154733	0.0509957	0.35492	-1.49444	down
Zbnp004262	Diosmetin-8-C-(2''-O-rhamnosyl)glucoside	香叶木素-8-C-(2''-O-鼠李糖基)葡萄糖苷	Flavonoids	黄酮	Flavones	黄酮	C28H32O15	3	98891-92-0	731895	762756	451368	79762.9	96633.3	139576	1.24315	0.0284355	0.0758279	6.15883	2.62266	up
Lasp010382	Ent-16beta-Methoxy-19-Kauranoic Acid	对映-16-甲氧基-19-贝壳杉酸	Terpenoids	萜类	Ditepenoids	二萜	C21H34O3	3	38308-35-9	1.17094e+06	1.03934e+06	973622	136530	136530	136530	1.28214	0.0039119	0.024974	7.77341	2.95855	up
Xmzn007677	Ergotamine	麦角胺	Alkaloids	生物碱	Plumerane	吲哚类生物碱	C33H35N5O5	3	113-15-5	1.21697e+06	1.20585e+06	1.11075e+06	6.07014e+06	5.66409e+06	4.78648e+06	1.27773	0.0072096	0.0333746	0.213888	-2.22507	down
Zbnn005416	Eriodictyol-7-O-(6''-acetyl)glucoside	圣草酚-7-O-(6''-乙酰)葡萄糖苷	Flavonoids	黄酮	Flavanones	二氢黄酮	C23H24O12	3	-	4565.63	4565.63	4565.63	30426.1	24505.9	22828.1	1.2777	0.0114465	0.043962	0.176143	-2.50518	down
Zbnn005420	Eriodictyol-7-O-(6''-malonyl)glucoside	圣草酚-7-O-(6''-丙二酰)葡萄糖苷	Flavonoids	黄酮	Flavanones	二氢黄酮	C24H24O14	3	-	11267.7	4822.38	3164.32	632.863	632.863	632.863	1.21396	0.144089	0.228269	10.1414	3.34219	up
Wagp002534	Fagaramide	花椒酰胺	Alkaloids	生物碱	Alkaloids	生物碱	C14H17NO3	3	495-86-3	259802	239222	159575	459325	422957	444970	1.18282	0.0113415	0.0437328	0.496212	-1.01097	down
mws1212	Ferulic acid methyl ester	阿魏酸甲酯	Phenolic acids	酚酸类	Phenolic acids	酚酸类	C11H12O4	3	2309-07-1	447572	459915	433708	1.04823e+06	1.13937e+06	969410	1.27527	0.00559998	0.0295727	0.42483	-1.23504	down
pmp001245	Feruloylcholine	阿魏酰胆碱	Alkaloids	生物碱	Phenolamine	酚胺	C15H22NO4+	3	85927-25-9	44587.1	83414.9	50111.1	124083	147536	119884	1.15093	0.0112771	0.0436593	0.454948	-1.13623	down
Smhn005081	Fortuneanoside A	Fortuneanoside A	Phenolic acids	酚酸类	Phenolic acids	酚酸类	C19H22O9	3	-	3.26673e+06	2.71069e+06	3.30216e+06	2956.01	58538.8	2956.01	1.21787	0.00360392	0.0233951	143.979	7.16972	up
Smhn005674	Fortuneanoside C	Fortuneanoside C	Phenolic acids	酚酸类	Phenolic acids	酚酸类	C20H24O9	3	-	7.72108e+06	6.01966e+06	5.90427e+06	148106	148106	148106	1.28258	0.00831596	0.0360296	44.2138	5.46643	up
Lmfp012576	Fusosteride A	Fusosteride A	Steroids	甾体	Steroid	甾体	C21H32O3	3	-	11683.6	13660.6	11762.2	75467	68575.3	70833.1	1.28114	0.000450424	0.00908816	0.172688	-2.53376	down
mws0024	Gallic acid	没食子酸	Phenolic acids	酚酸类	Phenolic acids	酚酸类	C7H6O5	3	149-91-7	558201	553125	803733	201422	221772	152504	1.23712	0.026852	0.0739197	3.3265	1.734	up
Lmyn006221	Gingerglycolipid C	姜糖脂 C	Lipids	脂质	Glycerol ester	甘油酯	C33H60O14	3	-	639496	558550	578294	245230	337878	295394	1.235	0.0012136	0.0139777	2.02201	1.01579	up
MW0106817	Gln-Leu	谷氨酰胺-亮氨酸	Amino acids and derivatives	氨基酸及其衍生物	Amino acids and derivatives	氨基酸及其衍生物	C11H21N3O4	3	-	4517.28	4517.28	4517.28	54185.1	55053	47530.4	1.28302	0.00246821	0.019266	0.0864449	-3.53207	down
MW0149771	Gln-Phe-Asn	谷氨酰胺-苯丙氨酰-天冬酰胺	Amino acids and derivatives	氨基酸及其衍生物	Amino acids and derivatives	氨基酸及其衍生物	C18H25N5O6	3	-	38795.7	35800.4	32485.8	68476.4	78465.7	94932.7	1.24055	0.0232838	0.0676071	0.442717	-1.17554	down
Hmtn001302	Glucosyloxybenzoic acid*	葡萄糖氧基苯甲酸*	Phenolic acids	酚酸类	Phenolic acids	酚酸类	C13H16O8	1	-	548969	549270	552397	1.39278e+06	1.19852e+06	1.63001e+06	1.26137	0.0205425	0.0619811	0.391026	-1.35467	down
pme1086	Glutathione reduced form	谷胱甘肽还原型	Amino acids and derivatives	氨基酸及其衍生物	Amino acids and derivatives	氨基酸及其衍生物	C10H17N3O6S	1	70-18-8	34916.3	67843.9	33185.7	6.588e+06	6.42119e+06	5.28819e+06	1.27787	0.0044937	0.026658	0.0074298	-7.07246	down
Lcsp001749	Gly-Glu-Leu	甘氨酰-谷氨酰-亮氨酸	Amino acids and derivatives	氨基酸及其衍生物	Amino acids and derivatives	氨基酸及其衍生物	C13H23N3O6	3	-	62151.8	51380.2	31774.9	6354.98	6354.98	6354.98	1.2589	0.0418652	0.0983143	7.62168	2.93011	up
Lcsn002767	Gly-Leu-Phe	甘氨酰-亮氨酰-苯丙氨酸	Amino acids and derivatives	氨基酸及其衍生物	Amino acids and derivatives	氨基酸及其衍生物	C17H25N3O4	3	103213-38-3	14535.4	16236.3	9097.48	1819.5	1819.5	1819.5	1.26339	0.0334696	0.0844624	7.30407	2.8687	up
Lcsp001899	Gly-Phe-Glu	甘氨酰-苯丙氨酰-谷氨酸	Amino acids and derivatives	氨基酸及其衍生物	Amino acids and derivatives	氨基酸及其衍生物	C16H21N3O6	3	-	24878.5	22393.8	28283.8	2831.66	2831.66	2831.66	1.28148	0.00578221	0.0298078	8.8942	3.15287	up
Walp013004	Glycidyl Linoleate*	亚油酸缩水甘油酯*	Lipids	脂质	Glycerol ester	甘油酯	C21H36O3	2	24305-63-3	495568	1.13895e+06	1.28562e+06	180735	208114	199034	1.19378	0.0849857	0.155705	4.96722	2.31244	up
Ladn005852	Graminone A	Graminone A	Lignans and Coumarins	木脂素和香豆素	Lignans	木脂素	C20H20O7	3	161407-72-3	157176	175684	141912	342894	347832	342649	1.26808	0.0021513	0.017878	0.459439	-1.12205	down
MWStz038	Grossamide	克罗酰胺	Alkaloids	生物碱	Phenolamine	酚胺	C36H36N2O8	3	80510-06-1	51544.4	42347.7	61293.4	1.8713e+06	1.82596e+06	1.80622e+06	1.28169	3.7521e-05	0.00255772	0.0281977	-5.14828	down
pmp001264	Hexadecylsphingosine	十六烷基鞘胺醇	Lipids	脂质	Sphingolipids	鞘脂	C16H35NO2	1	-	687074	685640	567188	3.94599e+06	3.46924e+06	3.20518e+06	1.27723	0.00445068	0.0266488	0.182658	-2.45278	down
MW0150850	His-Asn-Glu	组氨酰-天冬酰胺-谷氨酸	Amino acids and derivatives	氨基酸及其衍生物	Amino acids and derivatives	氨基酸及其衍生物	C15H22N6O7	3	-	1.53065e+06	1.80648e+06	1.66101e+06	15139.1	2117.21	2117.21	1.25402	0.00223889	0.0182034	257.989	8.01116	up
MW0150929	His-Glu-Trp	组氨酰-谷氨酰-色氨酸	Amino acids and derivatives	氨基酸及其衍生物	Amino acids and derivatives	氨基酸及其衍生物	C22H26N6O6	3	-	777385	766093	720363	1.68912e+06	1.37701e+06	1.61025e+06	1.26332	0.0112097	0.0435731	0.484102	-1.04662	down
MW0151090	His-Thr-Ala	组氨酰-苏氨酰-丙氨酸	Amino acids and derivatives	氨基酸及其衍生物	Amino acids and derivatives	氨基酸及其衍生物	C13H21N5O5	3	-	2.00826e+06	1.78811e+06	1.82226e+06	32534.1	17643.2	27108.1	1.27913	0.00131676	0.0143245	72.6997	6.18388	up
MWSHY0069	Hispidulin (5,7,4'-Trihydroxy-6-methoxyflavone)*	高车前素*	Flavonoids	黄酮	Flavones	黄酮	C16H12O6	3	1447-88-7	28867.2	22197.4	23301.3	49080.4	69687.7	70844.5	1.22592	0.0247637	0.0704195	0.392199	-1.35034	down
pme1292	Homogentisic acid*	高龙胆酸*	Phenolic acids	酚酸类	Phenolic acids	酚酸类	C8H8O4	3	451-13-8	12503.6	12503.6	12503.6	76366.9	94526.1	62518.2	1.27287	0.0195541	0.0598846	0.160707	-2.63749	down
Zadn009075	Hydroperoxylinoleic acid*	氢过氧基亚油酸*	Lipids	脂质	Free fatty acids	游离脂肪酸	C18H32O4	1	34444-18-3	35314.7	39674.2	42512.7	13543.5	17862	21052.4	1.21572	0.00200323	0.0171655	2.23992	1.16345	up
Lmbn007891	Hydroxy ricinoleic acid	羟基蓖麻油酸	Lipids	脂质	Free fatty acids	游离脂肪酸	C18H34O4	3	-	137009	143461	137192	47340.9	62899.5	63769.7	1.25369	0.00152452	0.0148448	2.40022	1.26316	up
Lmxn008846	Hydroxydihydrobovolide	羟基二氢博伏内酯	Others	其它类	Lactones	内酯类化合物	C11H18O3	3	6067-11-4	207765	230157	224172	603888	464927	530552	1.26255	0.0141659	0.0487711	0.413972	-1.27239	down
pme0033	Hypoxanthine	次黄嘌呤	Nucleotides and derivatives	核苷酸及其衍生物	Nucleotides and derivatives	核苷酸及其衍生物	C5H4N4O	3	68-94-0	119947	112797	121993	302446	323624	306548	1.2812	0.000215979	0.00660964	0.380367	-1.39454	down
MW0151400	Ile-Gln-Met	异亮氨酰-谷氨酰胺-甲硫氨酸	Amino acids and derivatives	氨基酸及其衍生物	Amino acids and derivatives	氨基酸及其衍生物	C16H30N4O5S1	3	-	8583.4	15936.4	15936.4	1716.68	1716.68	1716.68	1.2582	0.0407416	0.0968409	7.85551	2.97371	up
mws0103	Indole-3-carboxaldehyde	吲哚-3-甲醛	Alkaloids	生物碱	Plumerane	吲哚类生物碱	C9H7NO	3	487-89-8	44248.1	48305.4	44856.2	115513	91115.8	70673.6	1.18271	0.0679898	0.134033	0.495523	-1.01298	down
mws1417	Indole-3-carboxylic acid*	吲哚-3-甲酸*	Alkaloids	生物碱	Plumerane	吲哚类生物碱	C9H7NO2	3	771-50-6	589028	558464	465062	1.21374e+06	1.10584e+06	1.05246e+06	1.25314	0.000815482	0.0111507	0.478212	-1.06428	down
mws0102	Indole-5-carboxylic acid*	吲哚-5-甲酸*	Alkaloids	生物碱	Plumerane	吲哚类生物碱	C9H7NO2	3	1670-81-1	189548	277862	189342	475069	862376	1.13187e+06	1.17141	0.0834641	0.153549	0.265966	-1.91069	down
Lmsp003252	Isorhamnetin-3-O-sophoroside	异鼠李素-3-O-槐糖苷	Flavonoids	黄酮	Flavonols	黄酮醇	C28H32O17	1	-	2071.32	2071.32	2071.32	13432.4	17715.3	19469.2	1.27658	0.0143583	0.0491703	0.122765	-3.02603	down
Zbsp004525	Isoscoparin-2''-O-(6'''-(E)-feruloyl)-glucopyranoside	异金雀花素-2''-O-(6'''-(E)-阿魏酰)-葡萄糖苷	Flavonoids	黄酮	Flavones	黄酮	C38H40O19	3	-	11168.4	14987.4	9540.42	1091.03	1091.03	5455.17	1.09997	0.0129003	0.0468395	4.67397	2.22465	up
pmp001048	Ixoroside	龙船花苷	Terpenoids	萜类	Monoterpenoids	倍萜	C16H24O9	3	58514-30-0	36742.1	37815.1	43713.3	6108.81	6108.81	6108.81	1.28183	0.00420499	0.0259847	6.45355	2.69009	up
pme1654	Jasmonic acid	茉莉酸	Organic acids	有机酸	Organic acids	有机酸	C12H18O3	3	77026-92-7	7498.19	7498.19	7498.19	37490.9	48841.7	45579.5	1.27867	0.00844928	0.0364434	0.170527	-2.55193	down
Wbkn004126	Javanicolide C	Javanicolide C	Terpenoids	萜类	Ditepenoids	二萜	C26H36O11	3	-	3634.62	3634.62	3634.62	95789.6	100883	24272.5	1.21943	0.105414	0.179699	0.0493509	-4.34078	down
Cmrn003066	Kankanoside P	甘蓝苷 P	Terpenoids	萜类	Monoterpenoids	倍萜	C16H26O8	3	-	189637	149967	195310	318457	375454	380523	1.23344	0.00265715	0.0198844	0.497856	-1.0062	down
Lcsp001322	L-Glutaminyl-L-isoleucine	谷氨酰胺-异亮氨酸	Amino acids and derivatives	氨基酸及其衍生物	Amino acids and derivatives	氨基酸及其衍生物	C11H21N3O4	1	86416-45-7	19628	24261.6	31638.7	70520.8	55735	40248.7	1.12779	0.0584738	0.121615	0.453611	-1.14047	down
Lmhp002031	L-Leucyl-L-Leucine	L-亮氨酰-L-亮氨酸	Amino acids and derivatives	氨基酸及其衍生物	Amino acids and derivatives	氨基酸及其衍生物	C12H24N2O3	1	3303-31-9	255980	197546	193313	326444	574997	479746	1.14212	0.0681454	0.134203	0.46832	-1.09443	down
MWS00216g	L-Phenylalaninol	L-苯丙氨醇	Amino acids and derivatives	氨基酸及其衍生物	Amino acids and derivatives	氨基酸及其衍生物	C9H13NO	3	3182-95-4	640059	482945	633423	1.16905e+06	1.15611e+06	1.28677e+06	1.2398	0.000882402	0.0115733	0.486284	-1.04013	down
Lmhp002001	L-Valyl-L-Phenylalanine	L-缬氨酰-L-苯丙氨酸	Amino acids and derivatives	氨基酸及其衍生物	Amino acids and derivatives	氨基酸及其衍生物	C14H20N2O3	3	3918-92-1	4.74409e+06	7.24162e+06	4.46482e+06	1.01745e+07	1.3769e+07	1.42778e+07	1.17683	0.013032	0.0469834	0.430403	-1.21624	down
Wcdp006912	Lauryldiethanolamine	N-十二烷基乙醇胺	Others	其它类	Others	其它	C16H35NO2	3	1541-67-9	1.44744e+06	1.42425e+06	1.45408e+06	7.25864e+06	6.59434e+06	6.1169e+06	1.28128	0.00398408	0.0252675	0.216614	-2.2068	down
mws4101	Licoarylcoumarin	甘草芳香豆素	Lignans and Coumarins	木脂素和香豆素	Coumarins	香豆素	C21H20O6	3	125709-31-1	288964	275136	274923	19868.7	16977.2	17675.6	1.28304	0.000204268	0.00652516	15.3888	3.94381	up
Zbnp004589	Limocitrin 7-neohesperidoside*	柠檬素-7-O-新橘皮糖苷*	Flavonoids	黄酮	Flavonols	黄酮醇	C29H34O17	3	-	28404.6	6480.47	12593.9	648.695	648.695	648.695	1.23501	0.145781	0.230192	24.3972	4.60864	up
pme0088	Luteolin (5,7,3',4'-Tetrahydroxyflavone)	木犀草素	Flavonoids	黄酮	Flavones	黄酮	C15H10O6	3	491-70-3	8453.67	7257.66	13391	27117.7	18349.8	23253.1	1.1531	0.0164441	0.0524903	0.423487	-1.23961	down
pmb1108	Luteolin-6,8-di-C-glucoside-7-O-glucoside	木犀草素-6,8-C-二葡萄糖苷-7-O-葡萄糖苷	Flavonoids	黄酮	Flavones	黄酮	C33H40O21	2	-	8126.12	9493.13	6784.38	1356.88	1356.88	1356.88	1.27644	0.0130509	0.0469834	5.99505	2.58377	up
Hmgp006701	Lyciumamide A	Lyciumamide A	Alkaloids	生物碱	Phenolamine	酚胺	C36H36O8N2	3	-	55857	56624.8	64258.8	2.01619e+06	1.81318e+06	1.70061e+06	1.28302	0.0026485	0.0198844	0.0319605	-4.96757	down
Qagp006800	Lyciumamide B	枸杞酰胺 B	Alkaloids	生物碱	Phenolamine	酚胺	C36H36N2O8	3	-	37801	29622.6	25575.9	911625	866406	935910	1.281	0.000381864	0.00896225	0.0342674	-4.86702	down
MW0108017	Lys-Pro-Lys	赖氨酰-脯氨酰-赖氨酸	Amino acids and derivatives	氨基酸及其衍生物	Amino acids and derivatives	氨基酸及其衍生物	C17H33N5O4	3	-	1.27751e+06	866851	982639	45411.7	9082.35	9082.35	1.24177	0.0133654	0.0473941	49.1849	5.62014	up
MW0153174	Lys-Tyr-Gln	赖氨酰-酪氨酰-谷氨酰胺	Amino acids and derivatives	氨基酸及其衍生物	Amino acids and derivatives	氨基酸及其衍生物	C20H31N5O6	3	-	5569.56	5569.56	5569.56	43588.7	37860.7	29236.1	1.27417	0.017273	0.0547737	0.150956	-2.7278	down
pmd0153	LysoPA 16:0	溶血卵磷脂酸 16:0	Lipids	脂质	Glycerol ester	甘油酯	C19H39O7P	3	22002-85-3	31507.8	69673	101042	129413	150277	162682	1.00676	0.039577	0.0953806	0.457134	-1.12931	down
pmb0862	LysoPC 12:0	溶血磷脂酰胆碱 12:0	Lipids	脂质	LPC	溶血磷脂酰胆碱	C20H42NO7P	3	20559-18-6	17913	16159	18182.2	217509	174363	169020	1.28056	0.0080143	0.0354394	0.0931627	-3.4241	down
pmd0130	LysoPC 14:0	溶血磷脂酰胆碱 14:0	Lipids	脂质	LPC	溶血磷脂酰胆碱	C22H46NO7P	1	20559-16-4	611889	527543	627496	6.30221e+06	5.00351e+06	5.53897e+06	1.28036	0.00532413	0.0290791	0.104895	-3.25298	down
Lmhp009129	LysoPC 15:0(2n isomer)*	溶血磷脂酰胆碱 15:0(2n异构)*	Lipids	脂质	LPC	溶血磷脂酰胆碱	C23H48NO7P	1	-	845097	819373	866363	9.16134e+06	8.45842e+06	7.9823e+06	1.2831	0.00194968	0.0169181	0.0988527	-3.33858	down
pmb2319	LysoPC 15:0*	溶血磷脂酰胆碱 15:0*	Lipids	脂质	LPC	溶血磷脂酰胆碱	C23H48NO7P	1	108273-89-8	890152	955216	819437	9.42143e+06	8.55731e+06	8.68687e+06	1.2826	0.00091558	0.0118472	0.0999341	-3.32288	down
pmb2260	LysoPC 15:1	溶血磷脂酰胆碱 15:1	Lipids	脂质	LPC	溶血磷脂酰胆碱	C23H46NO7P	3	-	111563	139774	132091	2.13257e+06	1.95529e+06	1.88566e+06	1.28193	0.00137427	0.0143486	0.0641878	-3.96156	down
pmb0855	LysoPC 16:0	溶血磷脂酰胆碱 16:0	Lipids	脂质	LPC	溶血磷脂酰胆碱	C24H50NO7P	2	17364-16-8	1.38569e+07	1.41112e+07	1.388e+07	6.44792e+07	7.03739e+07	6.56623e+07	1.28312	0.00113373	0.0134927	0.208702	-2.26048	down
pmd0132	LysoPC 16:0(2n isomer)	溶血磷脂酰胆碱 16:0(2n异构)	Lipids	脂质	LPC	溶血磷脂酰胆碱	C24H50NO7P	1	-	1.42106e+07	1.36669e+07	1.3334e+07	6.61894e+07	6.57997e+07	6.90779e+07	1.28338	0.000182237	0.00638825	0.204964	-2.28656	down
Lmhp008833	LysoPC 16:1(2n isomer)*	溶血磷脂酰胆碱 16:1(2n异构)*	Lipids	脂质	LPC	溶血磷脂酰胆碱	C24H48NO7P	1	-	3.62602e+06	3.32823e+06	2.81493e+06	1.71414e+07	1.61171e+07	1.77068e+07	1.27817	0.000128901	0.0055227	0.191683	-2.38321	down
pmp001270	LysoPC 16:1*	溶血磷脂酰胆碱 16:1*	Lipids	脂质	LPC	溶血磷脂酰胆碱	C24H48NO7P	1	76790-27-7	3.69907e+06	3.29288e+06	3.36989e+06	1.63579e+07	1.6016e+07	1.92725e+07	1.27936	0.00506949	0.0281671	0.200631	-2.31738	down
pma1303	LysoPC 16:2	溶血磷脂酰胆碱 16:2	Lipids	脂质	LPC	溶血磷脂酰胆碱	C24H46NO7P	3	-	400749	372101	369733	3.53754e+06	3.29469e+06	3.24023e+06	1.28325	0.000832964	0.0113095	0.113437	-3.14004	down
pmb0863	LysoPC 16:2(2n isomer)	溶血磷脂酰胆碱 16:2(2n异构)	Lipids	脂质	LPC	溶血磷脂酰胆碱	C24H46NO7P	3	-	396804	418482	394961	3.68057e+06	3.12467e+06	3.3143e+06	1.28251	0.00295344	0.0206312	0.119595	-3.06377	down
Lmhp010515	LysoPC 17:0(2n isomer)*	溶血磷脂酰胆碱 17:0(2n异构)*	Lipids	脂质	LPC	溶血磷脂酰胆碱	C25H52NO7P	3	-	89532.7	75675.3	75690.6	912085	872546	858227	1.28246	0.000155751	0.00612594	0.0911508	-3.4556	down
pmb2406	LysoPC 17:0*	溶血磷脂酰胆碱 17:0*	Lipids	脂质	LPC	溶血磷脂酰胆碱	C25H52NO7P	3	50930-23-9	127046	116057	119841	1.28365e+06	1.19563e+06	1.08472e+06	1.28249	0.00282413	0.0201381	0.101836	-3.29568	down
Lmhp009590	LysoPC 17:1	溶血磷脂酰胆碱 17:1	Lipids	脂质	LPC	溶血磷脂酰胆碱	C25H50NO7P	3	-	175454	185325	206789	2.95098e+06	2925224	2.70467e+06	1.28287	0.000738712	0.0107265	0.0661433	-3.91826	down
Lmhp008718	LysoPC 17:2	溶血磷脂酰胆碱 17:2	Lipids	脂质	LPC	溶血磷脂酰胆碱	C25H48NO7P	3	-	530388	542004	513914	2.42242e+06	2.21882e+06	2.25615e+06	1.28286	0.00105809	0.0132929	0.229986	-2.12038	down
mws0126	LysoPC 18:0	溶血磷脂酰胆碱 18:0	Lipids	脂质	LPC	溶血磷脂酰胆碱	C26H54NO7P	1	19420-57-6	102713	106513	90977.8	717966	674114	648295	1.28178	0.000739997	0.0107265	0.147132	-2.76482	down
pmd0136	LysoPC 18:0(2n isomer)	溶血磷脂酰胆碱 18:0(2n异构)	Lipids	脂质	LPC	溶血磷脂酰胆碱	C26H54NO7P	1	-	79344.2	80630.8	73102.4	196890	191341	205267	1.28007	8.27147e-05	0.00419668	0.392718	-1.34843	down
pmp001281	LysoPC 18:1	溶血磷脂酰胆碱 18:1	Lipids	脂质	LPC	溶血磷脂酰胆碱	C26H52NO7P	2	-	3.14519e+07	3.03973e+07	2.87725e+07	7.24168e+07	6.96838e+07	7.25201e+07	1.28112	5.88737e-06	0.000916801	0.422241	-1.24386	down
Lmhp010190	LysoPC 18:1(2n isomer)	溶血磷脂酰胆碱 18:1(2n异构)	Lipids	脂质	LPC	溶血磷脂酰胆碱	C26H52NO7P	1	-	3.02255e+07	2.93249e+07	2.92276e+07	7.33708e+07	7.31505e+07	7.19895e+07	1.28351	3.92109e-07	0.0002718	0.406287	-1.29943	down
Hmqp006235	LysoPC 18:4	溶血磷脂酰胆碱 18:4	Lipids	脂质	LPC	溶血磷脂酰胆碱	C26H46NO7P	3	-	306798	258101	263830	2.32666e+06	2.18991e+06	2.14933e+06	1.28195	0.000324303	0.00794819	0.124324	-3.00783	down
Lmhp010908	LysoPC 19:1	溶血磷脂酰胆碱 19:1	Lipids	脂质	LPC	溶血磷脂酰胆碱	C27H54NO7P	1	-	452690	455124	427022	2.60916e+06	2.1298e+06	2.66588e+06	1.27922	0.00686522	0.032434	0.180266	-2.4718	down
Lmhp007598	LysoPC 19:2(2n isomer)*	溶血磷脂酰胆碱 19:2(2n异构)*	Lipids	脂质	LPC	溶血磷脂酰胆碱	C27H52NO7P	3	-	499322	542155	444985	5.70886e+06	4.47455e+06	4.33153e+06	1.27867	0.0097546	0.0395934	0.102409	-3.28758	down
Lmhp007840	LysoPC 19:2*	溶血磷脂酰胆碱 19:2*	Lipids	脂质	LPC	溶血磷脂酰胆碱	C27H52NO7P	3	-	313159	332157	334144	3.25751e+06	2.68702e+06	2.59426e+06	1.28104	0.00665955	0.0319423	0.114707	-3.12397	down
pmd0143	LysoPC 20:0	溶血磷脂酰胆碱 20:0	Lipids	脂质	LPC	溶血磷脂酰胆碱	C28H58NO7P	3	108341-80-6	2043.85	2043.85	2043.85	40340.9	25521	10219.2	1.21564	0.115485	0.193445	0.0805922	-3.63322	down
Lmhp011549	LysoPC 20:1	溶血磷脂酰胆碱 20:1	Lipids	脂质	LPC	溶血磷脂酰胆碱	C28H56NO7P	2	-	106690	108606	101737	565144	374425	349853	1.25449	0.0412395	0.0975579	0.245873	-2.02402	down
pmd0146	LysoPC 20:2(2n isomer)*	溶血磷脂酰胆碱 20:2(2n异构)*	Lipids	脂质	LPC	溶血磷脂酰胆碱	C28H54NO7P	3	-	97295	96735.7	98459.4	871283	974080	903913	1.28335	0.00136495	0.0143486	0.106388	-3.23259	down
pmd0147	LysoPC 20:2*	溶血磷脂酰胆碱 20:2*	Lipids	脂质	LPC	溶血磷脂酰胆碱	C28H54NO7P	3	-	93429.9	80721.2	101787	990931	933399	903262	1.2815	0.000513941	0.00970827	0.0975877	-3.35716	down
Lmhp009890	LysoPC 20:3	溶血磷脂酰胆碱 20:3	Lipids	脂质	LPC	溶血磷脂酰胆碱	C28H52NO7P	1	1199257-41-4	143478	137276	171866	872685	850282	810860	1.27954	3.2857e-05	0.00243648	0.178631	-2.48495	down
pmc0960	LysoPC 20:4	溶血磷脂酰胆碱 20:4	Lipids	脂质	LPC	溶血磷脂酰胆碱	C28H50NO7P	3	-	536363	567355	546417	2.15241e+06	2.17134e+06	2.10685e+06	1.28344	8.23153e-06	0.00103273	0.256607	-1.96237	down
Lmhp008742	LysoPC 20:5	溶血磷脂酰胆碱 20:5	Lipids	脂质	LPC	溶血磷脂酰胆碱	C28H48NO7P	3	162440-04-2	61671.6	71201.1	49720.6	487733	541089	494719	1.27718	0.000414303	0.00904522	0.119848	-3.06072	down
Lmhp010394	LysoPC 22:4	溶血磷脂酰胆碱 22:4	Lipids	脂质	LPC	溶血磷脂酰胆碱	C30H54NO7P	3	-	15244.2	17510.3	13338.9	59960.5	64056.4	69188.3	1.27418	0.00070647	0.0107265	0.238572	-2.0675	down
Lmhp010099	LysoPC 22:5	溶血磷脂酰胆碱 22:5	Lipids	脂质	LPC	溶血磷脂酰胆碱	C30H52NO7P	3	-	49684.2	51030.5	46310.7	164182	193398	181866	1.27911	0.00344013	0.0227143	0.272549	-1.87541	down
Lmhp009682	LysoPC 22:5(2n isomer)	溶血磷脂酰胆碱 22:5(2n异构)	Lipids	脂质	LPC	溶血磷脂酰胆碱	C30H52NO7P	3	-	54315.6	55794.9	52496.2	139349	160716	168338	1.27572	0.00664559	0.0319423	0.347151	-1.52636	down
Lmhp008337	LysoPE 14:0(2n isomer)*	溶血磷脂酰乙醇胺 14:0(2n异构)*	Lipids	脂质	LPE	溶血磷脂酰乙醇胺	C19H40NO7P	3	-	76894.8	77390.7	86761.2	263204	254475	244718	1.28017	5.19123e-05	0.00312772	0.31617	-1.66123	down
pmb0864	LysoPE 14:0*	溶血磷脂酰乙醇胺 14:0*	Lipids	脂质	LPE	溶血磷脂酰乙醇胺	C19H40NO7P	3	-	44646.9	44919.2	57860.6	211490	215803	166681	1.26561	0.00736386	0.0337233	0.248204	-2.0104	down
Lmhp009187	LysoPE 15:0	溶血磷脂酰乙醇胺 15:0	Lipids	脂质	LPE	溶血磷脂酰乙醇胺	C20H42NO7P	3	-	77400.9	69361.3	147523	405403	311051	385003	1.20711	0.0022471	0.0182034	0.267178	-1.90413	down
Lmhp008885	LysoPE 15:0(2n isomer)	溶血磷脂酰乙醇胺 15:0(2n异构)	Lipids	脂质	LPE	溶血磷脂酰乙醇胺	C20H42NO7P	3	-	826782	803183	728504	2.13219e+06	2.23282e+06	2.0446e+06	1.27855	0.000173279	0.00630342	0.367958	-1.44239	down
pmb0876	LysoPE 16:0	溶血磷脂酰乙醇胺 16:0	Lipids	脂质	LPE	溶血磷脂酰乙醇胺	C21H44NO7P	1	53862-35-4	1.53196e+06	1.45649e+06	1.36091e+06	7.00352e+06	6.61475e+06	6.85409e+06	1.28246	5.72002e-05	0.00334188	0.21245	-2.2348	down
pmd0160	LysoPE 16:0(2n isomer)	溶血磷脂酰乙醇胺 16:0(2n异构)	Lipids	脂质	LPE	溶血磷脂酰乙醇胺	C21H44NO7P	3	-	1.63479e+06	1.48711e+06	1.46181e+06	6.89854e+06	7.234e+06	6.65404e+06	1.28195	0.000353831	0.00846773	0.220513	-2.18107	down
Lmhp008763	LysoPE 16:1(2n isomer)*	溶血磷脂酰乙醇胺 16:1(2n异构)*	Lipids	脂质	LPE	溶血磷脂酰乙醇胺	C21H42NO7P	1	-	2.03623e+06	2.32537e+06	2.4915e+06	1.09041e+07	1.03562e+07	1.01157e+07	1.27954	5.02188e-05	0.00312328	0.218418	-2.19483	down
Lmhp009034	LysoPE 16:1*	溶血磷脂酰乙醇胺 16:1*	Lipids	脂质	LPE	溶血磷脂酰乙醇胺	C21H42NO7P	1	-	2.50321e+06	2.25953e+06	2.00933e+06	1.00025e+07	9.43668e+06	9.73951e+06	1.27889	5.0735e-06	0.000889246	0.23209	-2.10724	down
Lmhp007836	LysoPE 16:3	溶血磷脂酰乙醇胺 16:3	Lipids	脂质	LPE	溶血磷脂酰乙醇胺	C21H38NO7P	3	-	5826.7	10044.5	6797.02	38331	26570	31457.4	1.24124	0.010932	0.0427405	0.235249	-2.08774	down
Lmhp010162	LysoPE 17:0	溶血磷脂酰乙醇胺 17:0	Lipids	脂质	LPE	溶血磷脂酰乙醇胺	C22H46NO7P	3	-	161741	130466	134292	321964	364339	310642	1.2603	0.00145016	0.014562	0.427805	-1.22497	down
pmb0883	LysoPE 18:0	溶血磷脂酰乙醇胺 18:0	Lipids	脂质	LPE	溶血磷脂酰乙醇胺	C23H48NO7P	3	69747-55-3	2552.33	2552.33	2552.33	17326.6	17141.3	12761.7	1.27616	0.0125487	0.046241	0.162123	-2.62484	down
mws0289	LysoPE 18:1*	溶血磷脂酰乙醇胺 18:1*	Lipids	脂质	LPE	溶血磷脂酰乙醇胺	C23H46NO7P	3	89576-29-4	4.88805e+06	4.66619e+06	4.69548e+06	9.61771e+06	1.05565e+07	9.91675e+06	1.27947	0.00166037	0.0156155	0.473555	-1.0784	down
Lmhp008589	LysoPE 18:3(2n isomer)	溶血磷脂酰乙醇胺 18:3(2n异构)	Lipids	脂质	LPE	溶血磷脂酰乙醇胺	C23H42NO7P	1	-	2.05955e+07	1.9746e+07	1.99106e+07	4.41089e+07	4.35178e+07	3.98134e+07	1.27853	0.00270478	0.0198844	0.472787	-1.08074	down
Lmhp008233	LysoPE 18:4	溶血磷脂酰乙醇胺 18:4	Lipids	脂质	LPE	溶血磷脂酰乙醇胺	C23H40NO7P	3	-	33059.3	26468.2	27407.1	269133	281478	258277	1.28123	0.000294431	0.00777621	0.107474	-3.21794	down
Lmhp010757	LysoPE 20:2	溶血磷脂酰乙醇胺 20:2	Lipids	脂质	LPE	溶血磷脂酰乙醇胺	C25H48NO7P	1	-	4135.11	4135.11	4135.11	69724.6	60670.6	62281.3	1.28338	0.00214663	0.017878	0.0643843	-3.95715	down
Lmhp009802	LysoPE 20:3(2n isomer)*	溶血磷脂酰乙醇胺 20:3(2n异构)*	Lipids	脂质	LPE	溶血磷脂酰乙醇胺	C25H46NO7P	3	-	19606.8	27874.9	24491.7	97668	95736.2	101745	1.27023	3.0645e-05	0.00241547	0.243854	-2.03591	down
Lmhp010040	LysoPE 20:3*	溶血磷脂酰乙醇胺 20:3*	Lipids	脂质	LPE	溶血磷脂酰乙醇胺	C25H46NO7P	3	-	11931.8	11418	12952.8	41541.5	32843.7	42975.9	1.26842	0.0121536	0.0454991	0.309324	-1.69281	down
Lmhp009497	LysoPE 20:4*	溶血磷脂酰乙醇胺 20:4*	Lipids	脂质	LPE	溶血磷脂酰乙醇胺	C25H44NO7P	3	-	3976.65	25371.2	3976.65	79144	151222	162911	1.16342	0.0367838	0.0904581	0.0847356	-3.56089	down
Hmyn007081	LysoPG 16:1	溶血磷脂酰甘油 16:1	Lipids	脂质	Glycerol ester	甘油酯	C22H43O9P	1	-	10663.6	8180.63	8030.93	21600.5	19581.5	14935.4	1.19598	0.024649	0.0701968	0.47891	-1.06217	down
Lacp005273	Malonyl glucosyl Amurensin	丙二酰葡萄糖基去氢黄柏苷	Flavonoids	黄酮	Flavonols	黄酮醇	C35H40O19	3	-	928586	946285	1.0107e+06	6222.61	6222.61	6222.61	1.28389	0.000680933	0.0107265	154.574	7.27216	up
MWS0442	Maltotriose	麦芽三糖	Others	其它类	Saccharides	糖类	C18H32O16	2	1109-28-0	77058.8	71347.4	79017.4	171186	160978	165713	1.27885	2.82687e-05	0.00241547	0.456787	-1.13041	down
pmf0283	Meso-Erythritol	内消旋-赤藓醇	Others	其它类	Saccharides	糖类	C4H10O4	3	149-32-6	12775.8	12775.8	12775.8	933153	1.08222e+06	597857	1.2793	0.0267352	0.0739197	0.0146667	-6.09132	down
MW0108165	Met-Lys-Lys	甲硫氨酰-赖氨酰-赖氨酸	Amino acids and derivatives	氨基酸及其衍生物	Amino acids and derivatives	氨基酸及其衍生物	C17H35N5O4S1	3	-	1.78114e+06	2.32137e+06	2.26153e+06	143236	131544	138828	1.28132	0.00733056	0.0336508	15.3867	3.94361	up
Wbhp009564	Methyl 8,9-epoxypimaran-18-oate	8,9-环氧匹马拉18-酸甲酯	Terpenoids	萜类	Terpene	萜类	C21H34O3	3	42855-38-9	500346	483764	619537	175129	176550	114496	1.24249	0.00478354	0.0274484	3.44001	1.78241	up
Lmdn003756	Methyl caffeate	咖啡酸甲酯	Phenolic acids	酚酸类	Phenolic acids	酚酸类	C10H10O4	2	3843-74-1	2261.64	2261.64	2261.64	14342.7	11308.2	12212.7	1.27981	0.00745448	0.0340574	0.179194	-2.4804	down
Lhjp111617	Methylgeniposide	甲基京尼平苷	Terpenoids	萜类	Monoterpenoids	倍萜	C18H26O10	3	-	40806.1	38187.2	34802.3	10449.4	5921.87	13429.5	1.20996	0.000706702	0.0107265	3.81854	1.93302	up
Wcsn010951	Moniliferanone C	Moniliferanone C	Others	其它类	Others	其它	C24H34O4	3	-	27275.3	56444.3	57278.2	68131.4	167226	148531	1.02228	0.105382	0.179699	0.367289	-1.44501	down
Sazp010264	Monogalactosyldiacylglycerol	单半乳糖甘油二酯	Lipids	脂质	Glycerol ester	甘油酯	C45H70O10	2	-	2114	2114	2114	11869.9	10570	13770.9	1.27905	0.00860215	0.036959	0.175141	-2.51341	down
pme3207	Muconic acid	己二烯二酸	Organic acids	有机酸	Organic acids	有机酸	C6H6O4	1	1119-72-8	4.29808e+06	3.17895e+06	5.2664e+06	1.13833e+07	7.98176e+06	1.03461e+07	1.18323	0.0138978	0.0484501	0.42891	-1.22125	down
Lmwp102904	N,N-Dimethyl-5-methoxytryptamine	N,N-二甲基-5-甲氧基色胺	Alkaloids	生物碱	Plumerane	吲哚类生物碱	C13H18N2O	3	1019-45-0	6885.83	6885.83	6885.83	101239	77878.5	46654.3	1.26049	0.0495414	0.109915	0.0914971	-3.45013	down
Wayn001257	N-(1-Deoxy-1-fructosyl)Leucine	N-(1-脱氧-1-果糖基)亮氨酸	Amino acids and derivatives	氨基酸及其衍生物	Amino acids and derivatives	氨基酸及其衍生物	C12H23NO7	3	-	86558.6	102839	115637	33838.1	43665.7	46141.8	1.23632	0.00919768	0.0384666	2.46701	1.30276	up
Wafp004987	N-Feruloylphenylacetamide	N-阿魏酰苯乙胺	Alkaloids	生物碱	Phenolamine	酚胺	C18H17NO4	3	-	21257.6	10872.6	17988	41130.1	31618.9	33312.8	1.12313	0.0117639	0.0446031	0.472537	-1.0815	down
Wafp003258	N-Feruloylphenylacetamide glucoside	N-阿魏酰苯乙胺 葡萄糖苷	Alkaloids	生物碱	Phenolamine	酚胺	C24H27NO9	3	-	3950.81	3950.81	3950.81	30555.6	19754.1	33609.9	1.26613	0.0292752	0.0770641	0.141236	-2.82382	down
Wahp001558	N-Feruloylspermidine	N-阿魏酰亚精胺	Alkaloids	生物碱	Phenolamine	酚胺	C17H27N3O3	3	-	165336	237841	176693	454887	465149	443435	1.2425	0.00464403	0.0272149	0.425289	-1.23348	down
MWStz294	N-Feruloyltryptamine	N-阿魏酰色胺	Alkaloids	生物碱	Plumerane	吲哚类生物碱	C20H20N2O3	3	53905-13-8	18324.8	14281.7	10831.7	785887	792547	845007	1.2803	0.000476694	0.00924682	0.0179242	-5.80195	down
Wafp004641	N-Feruloyltyramine 4-glucoside	N-阿魏酰酪胺 4-葡萄糖苷	Alkaloids	生物碱	Phenolamine	酚胺	C24H29NO9	1	-	2.12368e+06	2.98863e+06	3.01679e+06	4.77156e+06	4.68937e+06	7.01939e+06	1.14852	0.0531329	0.115101	0.493261	-1.01958	down
Zbqp002511	N-Methylisoleucine	N-甲基异亮氨酸	Amino acids and derivatives	氨基酸及其衍生物	Amino acids and derivatives	氨基酸及其衍生物	C7H15NO2	3	39554-61-5	71692.1	47141.8	52506.5	118587	130811	144952	1.22051	0.00222489	0.0182034	0.434488	-1.20261	down
mws0712	N-Propionylglycine	N-丙酰甘氨酸	Amino acids and derivatives	氨基酸及其衍生物	Amino acids and derivatives	氨基酸及其衍生物	C5H9NO3	3	21709-90-0	81559.3	66284.1	57131.5	7819.8	7819.8	7819.8	1.27806	0.0135857	0.0478851	8.73743	3.12721	up
Wafp003220	N-Sinapoylhomoagmatine	N-芥子酰高胍丁胺	Alkaloids	生物碱	Phenolamine	酚胺	C17H26N4O4	3	-	1.93258e+06	1.92877e+06	1.68975e+06	3.47585e+06	3.60328e+06	4.0559e+06	1.26247	0.00316186	0.021465	0.498526	-1.00426	down
Zahp005843	N-Trans-Sinapoyltyramine	N-反式芥子酰酪胺	Alkaloids	生物碱	Phenolamine	酚胺	C19H21NO5	3	200125-11-7	33262.4	36795.6	25479.9	133727	147343	120645	1.26538	0.00187685	0.0167626	0.237825	-2.07203	down
Lssp210092	N-trans-ferulic tyramine*	N-反式-阿魏酰酪胺*	Alkaloids	生物碱	Phenolamine	酚胺	C18H19NO4	1	-	3.72578e+06	3.99918e+06	3.43642e+06	7.98757e+06	7.58764e+06	7.14101e+06	1.26917	0.000437719	0.00908816	0.49134	-1.02521	down
Wahp003564	N1,N10-Bis(p-coumaroyl)spermidine	双(对香豆酰基)亚精胺	Alkaloids	生物碱	Phenolamine	酚胺	C25H31N3O4	3	114916-05-1	39015.1	21058.7	23865.1	4211.75	4211.75	4211.75	1.25818	0.0508899	0.111622	6.64324	2.73189	up
Hmgp002036	Nepetin-7-O-glucoside(Nepitrin)*	泽兰黄酮-7-O-葡萄糖苷(假荆芥属苷)*	Flavonoids	黄酮	Flavones	黄酮	C22H22O12	3	569-90-4	34098	43546.2	53417	6819.6	6819.6	6819.6	1.27145	0.0221292	0.0648405	6.40611	2.67945	up
Wbtn014060	Nigrolineaxanthone K	Nigrolineaxanthone K	Flavonoids	黄酮	Other Flavonoids	其它类黄酮	C23H22O5	3	864516-31-4	51219.6	36537.4	37913.4	396145	330196	286128	1.27234	0.0102614	0.0410457	0.124123	-3.01016	down
mws1038	Pantetheine	泛酰巯基乙胺	Alkaloids	生物碱	Alkaloids	生物碱	C11H22N2O4S	2	496-65-1	59151.7	55259.4	35000.5	106087	104986	151800	1.16844	0.0272762	0.0742774	0.411746	-1.28017	down
Zbhn006453	Pedalitin	胡麻黄酮	Flavonoids	黄酮	Flavones	黄酮	C16H12O7	3	22384-63-0	2431.02	2431.02	2431.02	12603.6	30154.6	20453.5	1.24798	0.0668116	0.132835	0.115375	-3.1156	down
Laxp004658	Phaseic Acid	菜豆酸	Terpenoids	萜类	Sesquiterpenoids	倍半萜	C15H20O5	3	24394-14-7	11987	7396.82	11826.5	1479.36	1479.36	1479.36	1.26674	0.0272485	0.0742774	7.03237	2.81401	up
MWS201483	Phe-Hyp	苯丙氨酰-羟脯氨酸	Amino acids and derivatives	氨基酸及其衍生物	Amino acids and derivatives	氨基酸及其衍生物	C14H18N2O4	3	90965-82-5	7568.76	15904.8	10638.8	1513.75	1513.75	1513.75	1.25473	0.0559139	0.119061	7.51165	2.90913	up
Lacn005311	Phellatin	去氢异黄柏苷	Flavonoids	黄酮	Flavonols	黄酮醇	C26H30O12	3	-	13519.5	54588.1	44802.9	2703.9	2703.9	2703.9	1.21121	0.106072	0.180614	13.9195	3.79903	up
mws2125	Phosphoenolpyruvate	磷酸烯醇式丙酮酸	Organic acids	有机酸	Organic acids	有机酸	C3H5O6P	3	138-08-9	1.25965e+06	1.23836e+06	1.23113e+06	657116	548615	630612	1.26861	0.00154592	0.0149026	2.03074	1.02201	up
Sazp004376	Phyllamyricoside C	Phyllamyricoside C	Lignans and Coumarins	木脂素和香豆素	Lignans	木脂素	C27H32O11	3	-	32713.2	59743	53285	129166	116378	106563	1.18212	0.00323356	0.0217223	0.413911	-1.27261	down
mws1656	Podophyllotoxin	鬼臼毒素	Lignans and Coumarins	木脂素和香豆素	Lignans	木脂素	C22H22O8	3	518-28-5	172264	189648	246622	546386	325284	474073	1.15744	0.0511362	0.112035	0.452192	-1.14499	down
MW0155819	Pro-Asp-Tyr	脯氨酰-天冬氨酰-酪氨酸	Amino acids and derivatives	氨基酸及其衍生物	Amino acids and derivatives	氨基酸及其衍生物	C18H23N3O7	3	-	75405.9	79905.4	84821.9	156079	167173	176988	1.27219	0.00140273	0.0144693	0.480035	-1.05879	down
MW0155826	Pro-Gln-Ala	脯氨酰-谷氨酰胺-丙氨酸	Amino acids and derivatives	氨基酸及其衍生物	Amino acids and derivatives	氨基酸及其衍生物	C13H22N4O5	3	-	9133.75	9133.75	9133.75	236307	45668.8	203567	1.19459	0.121942	0.201806	0.0564343	-4.14728	down
MWS201466	Pro-Trp	L-脯氨酸-L-色氨酸	Amino acids and derivatives	氨基酸及其衍生物	Amino acids and derivatives	氨基酸及其衍生物	C16H19N3O3	3	35310-39-5	1689.83	1689.83	1689.83	12511.4	11062.3	8449.17	1.27383	0.0170559	0.0541741	0.158309	-2.65919	down
MW0156040	Pro-Tyr-Val	脯氨酰-酪氨酰-缬氨酸	Amino acids and derivatives	氨基酸及其衍生物	Amino acids and derivatives	氨基酸及其衍生物	C19H27N3O5	3	-	178473	254130	258807	517601	562541	543945	1.23468	0.00190879	0.0167626	0.425722	-1.23202	down
Wasn005682	Protocatechuic acid 4-O-(6''-O-p-Coumaroyl)Glucoside	原儿茶酸 4-O-(6''-O-对香豆酸)葡萄糖苷	Phenolic acids	酚酸类	Phenolic acids	酚酸类	C22H22O11	3	-	17011	17240.3	11336.4	2267.28	2267.28	2267.28	1.27049	0.0215859	0.0640534	6.70227	2.74465	up
Lakn002165	Protocatechuic acid glucosyl xyloside	原儿茶酸葡萄糖基木糖苷	Phenolic acids	酚酸类	Phenolic acids	酚酸类	C18H24O13	1	-	887104	1.08985e+06	862557	2.50765e+06	2.28051e+06	1.60153e+06	1.19686	0.0414171	0.0978253	0.44439	-1.1701	down
MW0126337	Pyridoxamine phosphate	吡哆胺-5'-磷酸	Organic acids	有机酸	Organic acids	有机酸	C8H13N2O5P	3	529-96-4	16794.8	16794.8	16794.8	102991	83974	108058	1.27914	0.0079853	0.0353923	0.170781	-2.54978	down
pmb0803	Pyridoxine-5'-O-(6''-feruloyl)glucoside	吡哆醇-5'-O-(6''-阿魏酰)葡萄糖苷	Others	其它类	Vitamin	维生素	C24H29NO11	2	-	2201.64	2201.64	2201.64	17290.4	35835	31434.4	1.26356	0.0433565	0.100243	0.0781093	-3.67836	down
Lmcp004369	Quercetin-3',4'-dimethyl ether	槲皮素-3',4'-二甲醚	Flavonoids	黄酮	Flavonols	黄酮醇	C17H14O7	3	3306-29-4	15964.6	25175.2	26984.3	2794.56	2794.56	2794.56	1.26813	0.0281241	0.075485	8.12579	3.02251	up
Lmdp003286	Quercetin-3-O-alloside; Isohyperoside*	槲皮素-3-O-阿洛糖苷; 异金丝桃苷*	Flavonoids	黄酮	Flavonols	黄酮醇	C21H20O12	3	35589-21-0	6689.71	6689.71	6689.71	40369	33448.5	34121	1.28083	0.00561109	0.0295727	0.185931	-2.42716	down
Smgp004575	Quercetin-5-O-β-D-glucoside*	槲皮素-5-O-β-D-葡萄糖苷*	Flavonoids	黄酮	Flavonols	黄酮醇	C21H20O12	3	-	9395.04	9395.04	9395.04	46975.2	49352.5	47033.2	1.28367	0.000415626	0.00904522	0.196603	-2.34665	down
pme2746	Riboflavin 5'-Adenosine Diphosphate	核黄素-5'-腺嘌呤二磷酸	Nucleotides and derivatives	核苷酸及其衍生物	Nucleotides and derivatives	核苷酸及其衍生物	C27H33N9O15P2	2	146-14-5	403923	522281	464093	346958	160029	132441	1.04931	0.0460781	0.103662	2.17429	1.12054	up
Hmln008119	Robinlin	Robinlin	Terpenoids	萜类	Monoterpenoids	倍萜	C11H18O3	3	-	57525.9	83796.7	77908	310060	199952	185365	1.21343	0.0513371	0.112246	0.315268	-1.66535	down
pmn001423	Roseoside	长寿花糖苷	Others	其它类	Ketone compounds	酮类化合物	C19H30O8	3	54835-70-0	7.38206e+06	7.08257e+06	8.70746e+06	1.34204e+07	1.90106e+07	1.58455e+07	1.22029	0.0269125	0.0739197	0.479986	-1.05893	down
Lmqn000351	Rutinose	芸香糖	Others	其它类	Saccharides	糖类	C12H22O10	3	90-74-4	72807.1	63822	65143.6	37171.8	20856.4	40487.5	1.11856	0.0165546	0.052756	2.04813	1.0343	up
MWSHC2099	Salcolin A*	沙可林 A*	Flavonoids	黄酮	Flavones	黄酮	C27H26O11	1	369390-51-2	405575	402594	392100	1.99246e+06	1.38067e+06	1.88734e+06	1.26871	0.0188836	0.0581591	0.228168	-2.13183	down
pmp000235	Salcolin B*	沙可林 B*	Flavonoids	黄酮	Flavones	黄酮	C27H26O11	1	-	111979	158360	169240	664608	791475	768161	1.26558	0.00118595	0.013892	0.197631	-2.33912	down
WaYn003861	Salicin 6'-Acetate	水杨苷 6-乙酸酯	Phenolic acids	酚酸类	Phenolic acids	酚酸类	C15H20O8	3	19764-02-4	2.15474e+06	2.21705e+06	2.23371e+06	3726.57	3726.57	3726.57	1.28395	0.000119522	0.00548664	590.846	9.20664	up
Lmqp002784	Salicylamide	水杨酰胺	Alkaloids	生物碱	Phenolamine	酚胺	C7H7NO2	3	65-45-2	2.67571e+06	3.73986e+06	2.69918e+06	7.72653e+06	6.82924e+06	6.26397e+06	1.22918	0.00241272	0.0190644	0.437794	-1.19168	down
mws2367	Salidroside	红景天苷	Others	其它类	Alcohol compounds	醇类化合物	C14H20O7	3	10338-51-9	528115	579250	493001	1.08799e+06	805119	1.32513e+06	1.17225	0.0659597	0.13151	0.497281	-1.00787	down
Hmsn002598	Salirepin	柳匍匐次苷	Phenolic acids	酚酸类	Phenolic acids	酚酸类	C13H18O8	3	26652-12-0	138427	98737.7	121034	495684	391717	227263	1.16742	0.0810903	0.150764	0.321351	-1.63778	down
Lmxn004121	Scrophuloside A1	玄参苷 A1	Terpenoids	萜类	Terpene	萜类	C26H32O12	3	240819-14-1	48927.6	77972	42474.3	133127	111144	109486	1.14578	0.0128899	0.0468395	0.478786	-1.06255	down
Lmdp006732	Scutellarein-4'-methyl ether (5,6,7-Trihydroxy-4'-methoxyflavone)	野黄芩素-4'-甲醚; 5,6,7-三羟基-4'-甲氧基黄酮	Flavonoids	黄酮	Flavones	黄酮	C16H12O6	3	6563-66-2	533.853	533.853	533.853	8468.75	2669.26	10725.8	1.21233	0.10644	0.180967	0.0732514	-3.771	down
Hmtn005204	Semiaquilegin A	天葵子素 A	Terpenoids	萜类	Ditepenoids	二萜	C38H46O9	3	-	111600	111995	83639.7	210472	218579	223781	1.24319	0.00250255	0.0194553	0.470618	-1.08737	down
MW0156648	Ser-Arg-Met	丝氨酰-精氨酰-甲硫氨酸	Amino acids and derivatives	氨基酸及其衍生物	Amino acids and derivatives	氨基酸及其衍生物	C14H28N6O5S1	3	-	1.14629e+06	918909	896103	66613.4	63586.1	52990.4	1.28027	0.0072345	0.0333746	16.1652	4.01482	up
ZbBn000907	Shikimic Acid-3-Phosphate	莽草酸-3-磷酸	Organic acids	有机酸	Organic acids	有机酸	C7H11O8P	3	-	12816.5	19911.1	12813.2	39655.9	27586.3	41369.3	1.1728	0.0223702	0.0654472	0.4193	-1.25395	down
pmn001468	Sibiricose A3	西伯利亚远志糖 A3	Phenolic acids	酚酸类	Phenolic acids	酚酸类	C19H26O13	3	139726-39-9	17669.8	17669.8	17669.8	107961	98890.5	88348.8	1.28107	0.00489108	0.0275731	0.179571	-2.47738	down
Zmln002252	Sideretin (5,7,8-Trihydroxy-6-methoxycoumarin)	5,7,8-三羟基-6-甲氧基香豆素	Lignans and Coumarins	木脂素和香豆素	Coumarins	香豆素	C10H8O6	3	-	521891	484483	302725	1.06808e+06	1.00433e+06	910430	1.18538	0.00380826	0.0244744	0.438876	-1.18811	down
mws4085	Sinapic acid	芥子酸	Phenolic acids	酚酸类	Phenolic acids	酚酸类	C11H12O5	3	530-59-6	199362	175591	177407	295854	371137	565771	1.14544	0.104792	0.179272	0.448067	-1.15821	down
pmb0498	Sinapoylagmatine	芥子酰胍丁胺	Alkaloids	生物碱	Phenolamine	酚胺	C16H24N4O4	1	-	1.20357e+08	8.33312e+07	1.07109e+08	2.73716e+07	9.24461e+06	1.18868e+07	1.2103	0.00553137	0.0295646	6.40779	2.67983	up
Zmpn000095	Sorbitol-6-phosphate	山梨糖醇-6-磷酸	Others	其它类	Saccharides	糖类	C6H15O9P	3	20479-58-7	23700.4	35296.7	30606.1	75841.1	77507.2	57700	1.21197	0.0106149	0.0418518	0.424563	-1.23595	down
mws4019	Sugiol*	柳杉酚*	Terpenoids	萜类	Ditepenoids	二萜	C20H28O2	1	511-05-7	230412	218960	216730	623353	570147	654902	1.27914	0.00315323	0.021465	0.360366	-1.47247	down
Zbsp004862	Syringetin-3-O-glucoside*	丁香亭-3-O-葡萄糖苷*	Flavonoids	黄酮	Flavonols	黄酮醇	C23H24O13	3	40039-49-4	41763.9	33936.8	42782	84363.6	101890	61947.8	1.1712	0.0575132	0.120659	0.477365	-1.06683	down
HJAP006	Syringetin-7-O-glucoside*	丁香亭-7-O-葡萄糖苷*	Flavonoids	黄酮	Flavonols	黄酮醇	C23H24O13	3	-	37290.2	41967	40461.7	88939	81160.2	103543	1.26086	0.0130478	0.0469834	0.437501	-1.19264	down
mws0027	Syringic acid	丁香酸	Phenolic acids	酚酸类	Phenolic acids	酚酸类	C9H10O5	3	530-57-4	52294.5	65359.8	97370.7	306772	213998	316649	1.22275	0.0137748	0.0481993	0.256771	-1.96145	down
Wbhp009517	Tagalsin P	Tagalsin P	Terpenoids	萜类	Terpene	萜类	C18H28O3	3	-	42549.3	45015.5	47281.3	7345.28	7345.28	7345.28	1.28325	0.0013178	0.0143245	6.1194	2.61339	up
MW0157555	Thr-Arg-Met	苏氨酰-精氨酰-甲硫氨酸	Amino acids and derivatives	氨基酸及其衍生物	Amino acids and derivatives	氨基酸及其衍生物	C15H30N6O5S1	3	-	45263	51229.6	48928.9	234023	234988	206617	1.28056	0.00208316	0.0175596	0.215239	-2.21599	down
MW0157594	Thr-Asp-Trp	苏氨酰-天冬氨酰-色氨酸	Amino acids and derivatives	氨基酸及其衍生物	Amino acids and derivatives	氨基酸及其衍生物	C19H24N4O7	3	-	320437	378708	255664	10387.2	10387.2	10387.2	1.28113	0.0130618	0.0469834	30.6406	4.93737	up
Lcsp001977	Thr-Glu-Ile	苏氨酰-谷氨酰-异亮氨酸	Amino acids and derivatives	氨基酸及其衍生物	Amino acids and derivatives	氨基酸及其衍生物	C15H27N3O7	3	-	8264.72	24421.5	15314.8	1652.94	1652.94	1652.94	1.23394	0.0918456	0.164266	9.67989	3.27499	up
MW0157809	Thr-Thr-Asn	苏氨酰-苏氨酰-天冬酰胺	Amino acids and derivatives	氨基酸及其衍生物	Amino acids and derivatives	氨基酸及其衍生物	C12H22N4O7	3	-	14921.4	16492.5	16039.7	61437.2	50949.5	64433.7	1.27514	0.00821806	0.0357002	0.268372	-1.89769	down
MWS201394	Thr-Tyr	苏氨酰-酪氨酸	Amino acids and derivatives	氨基酸及其衍生物	Amino acids and derivatives	氨基酸及其衍生物	C13H18N2O5	3	145295-02-9	917.354	917.354	917.354	26954.5	32497.9	29335.7	1.28328	0.00311947	0.0213938	0.0309958	-5.01178	down
MW0157837	Thr-Tyr-Gln	苏氨酰-酪氨酰-谷氨酰胺	Amino acids and derivatives	氨基酸及其衍生物	Amino acids and derivatives	氨基酸及其衍生物	C18H26N4O7	3	-	1228.83	1228.83	11564.8	26631.7	21707.7	18699.3	1.04993	0.0173457	0.0548432	0.209169	-2.25726	down
Lmgn007652	Tianshic acid	天师酸	Lipids	脂质	Free fatty acids	游离脂肪酸	C18H34O5	3	-	5.82194e+06	4.87978e+06	3.65113e+06	1.86939e+06	1.27823e+06	1.18826e+06	1.22037	0.0240605	0.0692367	3.31025	1.72694	up
Zmdn005775	Torachrysone-8-O-(2''-acetyl)glucoside	决明酮-8-O-(2''-乙酰)葡萄糖苷	Quinones	醌类	Naphthol	萘酚类	C22H26O10	3	-	4.41421e+06	3.63819e+06	4.71961e+06	10836.9	10836.9	10836.9	1.2835	0.0056965	0.0295727	392.855	8.61785	up
Hmln003169	Trachelogenin	络石苷元	Lignans and Coumarins	木脂素和香豆素	Lignans	木脂素	C21H24O7	3	34209-69-3	184585	165255	148976	25117	28169.9	51806.9	1.23314	0.000714029	0.0107265	4.74639	2.24683	up
Wayn004603	Tricetin 3'-glucuronide*	五羟基黄酮 3'-葡糖苷酸*	Flavonoids	黄酮	Flavones	黄酮	C21H18O13	1	-	1395.79	1395.79	1395.79	6978.97	19737.9	25040.8	1.21913	0.0977901	0.171133	0.0809036	-3.62765	down
Lmzp004885	Tricin (5,7,4'-Trihydroxy-3',5'-dimethoxyflavone)	苜蓿素(麦黄酮)	Flavonoids	黄酮	Flavones	黄酮	C17H14O7	2	520-32-1	191494	216556	173666	522611	746364	621513	1.25707	0.01836	0.0569281	0.307707	-1.70037	down
Zbsp005413	Tricin-4'-O-(2''-Sinapoyl)glucoside-5-O-glucoside*	苜蓿素-4'-O-(2''-芥子酰)葡萄糖苷-5-O-葡萄糖苷*	Flavonoids	黄酮	Flavones	黄酮	C40H44O21	3	-	15950.4	10241	5717.71	1143.54	1143.54	1143.54	1.23727	0.0850401	0.155705	9.30127	3.21743	up
pmb3053	Tricin-4'-O-(C-Veratroylglycol) ether	苜蓿素-4'-O-(C-藜芦基乙二醇)醚	Flavonoids	黄酮	Flavones	黄酮	C27H24O11	3	-	11651.4	13391.1	9488.91	88679.6	93270.9	88019.9	1.27772	8.57039e-06	0.00103273	0.127908	-2.96682	down
pmb0746	Tricin-4'-O-(guaiacylglycerol)ether*	苜蓿素-4'-O-(愈创木酰甘油)醚*	Flavonoids	黄酮	Flavones	黄酮	C27H26O11	1	-	374327	434440	470197	2.22718e+06	2.31707e+06	2.32206e+06	1.2797	1.65197e-06	0.00063241	0.186267	-2.42456	down
ZBN0267	Tricin-4'-O-(β-guaiacylglycerol)ether-7-O-(6''-acetyl)glucoside*	苜蓿素-4'-O-(β-愈创木酰甘油)醚-7-O-(6''-乙酰)葡萄糖苷*	Flavonoids	黄酮	Flavones	黄酮	C35H38O17	3	-	145893	154699	156362	389254	279963	355584	1.24535	0.0269218	0.0739197	0.445895	-1.16522	down
Zmzp006857	Tricin-4'-O-[β-guaiacyl-(9''-O-acetyl)glycerol]ether	苜蓿素-4'-O-[β-愈创木基-(9''-O-乙酰基)甘油基]醚	Flavonoids	黄酮	Flavones	黄酮	C29H28O12	3	-	51260.6	55791.6	59353.4	642287	475784	387853	1.2717	0.026703	0.0739197	0.110501	-3.17787	down
ZBN0262	Tricin-4'-O-guaiacylglycerol-5-O-Feruloyl	苜蓿素-4'-O-愈创木甘油醚-5-O-阿魏酰	Flavonoids	黄酮	Flavones	黄酮	C37H34O14	3	-	4690.23	4690.23	4690.23	43757.5	26009.9	23451.2	1.25719	0.0538842	0.116207	0.150943	-2.72792	down
Zbsp005569	Tricin-5-O-(3'-malonyl)glucoside-4'-O-syringylalcoholether*	苜蓿素-5-O-(3'-丙二酰基)葡萄糖苷-4'-丁香醇醚*	Flavonoids	黄酮	Flavones	黄酮	C35H36O18	3	-	1789.6	1789.6	1789.6	8948.01	11329.1	18266.2	1.2544	0.0583509	0.121615	0.139293	-2.84381	down
Zbsp005239	Tricin-5-O-(guaiacylglycerol)ether-7-O-glucoside*	苜蓿素-5-O-(愈创木酰甘油)醚-7-O-葡萄糖苷*	Flavonoids	黄酮	Flavones	黄酮	C33H36O16	1	-	213515	555425	455451	42703	42703	42703	1.24068	0.0692293	0.135644	9.55741	3.25662	up
Zbsp005341	Tricin-5-O-glucoside-7-O-(2''-Sinapoyl)glucoside*	苜蓿素-5-O-葡萄糖苷-7-O-(2''-芥子酰)葡萄糖苷*	Flavonoids	黄酮	Flavones	黄酮	C40H44O21	3	-	1686.48	1686.48	1686.48	23392.8	20518.4	8432.42	1.23469	0.0751568	0.143326	0.0966585	-3.37096	down
Zbsp006693	Tricin-5-O-guaiacylglycerol*	苜蓿素-5-O-愈创木酚基甘油*	Flavonoids	黄酮	Flavones	黄酮	C27H26O11	1	-	429497	430012	530430	2.18636e+06	2.09442e+06	2.20761e+06	1.27844	3.93887e-06	0.000759414	0.214219	-2.22284	down
pmb3032	Tricin-7-O-(2''-Malonyl)rhamnoside	苜蓿素-7-O-(2''-丙二酰)鼠李糖苷	Flavonoids	黄酮	Flavones	黄酮	C26H26O14	2	-	2593.79	2593.79	2593.79	41694.6	34701.9	12968.9	1.22586	0.0879959	0.159301	0.0870735	-3.52162	down
Zbsp005544	Tricin-7-O-(2''-feruloyl)glucoside-5-O-glucoside	苜蓿素-7-O-(2''-阿魏酰)葡萄糖苷-5-O-葡萄糖苷	Flavonoids	黄酮	Flavones	黄酮	C39H42O20	3	-	1881.48	1881.48	1881.48	9407.42	10664	20404.3	1.24518	0.0791054	0.147756	0.139453	-2.84215	down
Zbsp006822	Tricin-7-O-guaiacylglycerol*	苜蓿素-7-O-愈创木酚基甘油*	Flavonoids	黄酮	Flavones	黄酮	C27H26O11	1	-	490137	399320	580784	2.28001e+06	2.2389e+06	2.31163e+06	1.27155	0.000180671	0.00638825	0.215245	-2.21595	down
Zbsp105239	Tricin-7-O-guaiacylglycerol-ether-4'-O-glucoside*	苜蓿素-7-O-愈创木酰甘油醚-4'-O-葡萄糖苷*	Flavonoids	黄酮	Flavones	黄酮	C33H36O16	1	-	515002	404846	315175	57683.5	57683.5	57683.5	1.27046	0.0256276	0.0722994	7.13678	2.83527	up
MWS201187	Trp-His	色氨酰-组氨酸	Amino acids and derivatives	氨基酸及其衍生物	Amino acids and derivatives	氨基酸及其衍生物	C17H19N5O3	3	-	36410.4	40981.7	30737	126321	128608	106967	1.26606	0.00229444	0.0183582	0.298786	-1.74282	down
MW0158245	Trp-Ser-Ser	色氨酰-丝氨酰-丝氨酸	Amino acids and derivatives	氨基酸及其衍生物	Amino acids and derivatives	氨基酸及其衍生物	C17H22N4O6	3	-	156433	191133	125140	6095.51	6095.51	6095.51	1.28034	0.0154656	0.0509957	25.8499	4.69209	up
MW0110201	Tyr-Gly-Gly	酪氨酰-甘氨酰-甘氨酸	Amino acids and derivatives	氨基酸及其衍生物	Amino acids and derivatives	氨基酸及其衍生物	C13H17N3O5	3	21778-69-8	2.57707e+06	2.5938e+06	1.82045e+06	7.18734e+06	7.18758e+06	5.9107e+06	1.24582	0.00208566	0.0175596	0.344644	-1.53682	down
MW0158518	Tyr-Leu-Gly	酪氨酰-亮氨酰-谷氨酸	Amino acids and derivatives	氨基酸及其衍生物	Amino acids and derivatives	氨基酸及其衍生物	C17H25N3O5	3	-	152116	208300	187290	444989	397045	456975	1.25006	0.000555214	0.00998815	0.421634	-1.24594	down
MWS1900	Undecanedioic acid	十一烷二酸	Lipids	脂质	Free fatty acids	游离脂肪酸	C11H20O4	3	1852-04-6	32851.3	29410.6	34058.8	67442	64582.2	70627	1.27216	0.000127105	0.0055227	0.475303	-1.07308	down
Cmdn000784	Uric acid	尿酸	Nucleotides and derivatives	核苷酸及其衍生物	Nucleotides and derivatives	核苷酸及其衍生物	C5H4N4O3	3	69-93-2	302964	269783	297951	155140	91512.1	158497	1.16511	0.0088245	0.0373926	2.14908	1.10372	up
MW0159230	Val-Tyr-Tyr	缬氨酰-酪氨酰-酪氨酸	Amino acids and derivatives	氨基酸及其衍生物	Amino acids and derivatives	氨基酸及其衍生物	C23H29N3O6	3	-	988804	971683	826263	2.16314e+06	2.09704e+06	1.91691e+06	1.26591	0.000430174	0.00908816	0.451143	-1.14834	down
Lcsp001100	Val-Val-Asp	缬氨酰-缬氨酰-天冬氨酸	Amino acids and derivatives	氨基酸及其衍生物	Amino acids and derivatives	氨基酸及其衍生物	C14H25N3O6	3	-	2612.96	2612.96	2612.96	30998.3	13064.8	27244.9	1.24562	0.0606289	0.12389	0.10993	-3.18534	down
mws0028	Vanillic acid	香草酸	Phenolic acids	酚酸类	Phenolic acids	酚酸类	C8H8O4	3	121-34-6	589470	751566	783194	2.09115e+06	1.09395e+06	1.08273e+06	1.04371	0.162316	0.249757	0.497732	-1.00656	down
Zmtn001661	Vanilloloside	香草醇苷	Phenolic acids	酚酸类	Phenolic acids	酚酸类	C14H20O8	3	74950-96-2	1.44713e+06	1.3015e+06	1.10845e+06	2.81243e+06	2.68499e+06	2.69805e+06	1.25724	0.00154518	0.0149026	0.470637	-1.08731	down
Lahp003268	Vicenin-2,6''-O-Glucoside	维采宁-2,6''-氧-葡萄糖苷	Flavonoids	黄酮	Flavones	黄酮	C33H40O20	2	-	4049.39	5536.29	5536.29	809.878	809.878	809.878	1.27568	0.0134478	0.047573	6.22397	2.63784	up
Lmhn002321	Vnilloylcaffeoyltartaric acid	香草酰咖啡酰酒石酸	Phenolic acids	酚酸类	Phenolic acids	酚酸类	C21H18O12	3	-	203966	63938.5	141044	414219	285857	252866	1.00236	0.048652	0.108315	0.429142	-1.22047	down
mws0668	Xanthosine	黄苷	Nucleotides and derivatives	核苷酸及其衍生物	Nucleotides and derivatives	核苷酸及其衍生物	C10H12N4O6	1	146-80-5	489412	725217	607222	1.232e+06	1.4027e+06	1.08921e+06	1.20211	0.00623777	0.0309959	0.48923	-1.03141	down
Zblp005760	dihydro-N-feruloyltyramine	二氢阿魏酰酪胺	Alkaloids	生物碱	Phenolamine	酚胺	C18H21NO4	3	-	22805.8	26324.7	24187.5	61115.8	49078.4	59571.9	1.2608	0.00956748	0.0393307	0.431877	-1.21131	down
Zamn006847	glycoric acid	glycoric acid	Others	其它类	Others	其它	C12H20O4	3	-	208446	193334	235560	596023	770536	686018	1.26748	0.00821825	0.0357002	0.310507	-1.6873	down
mws1195	p-Coumaric acid methyl ester	对香豆酸甲酯	Phenolic acids	酚酸类	Phenolic acids	酚酸类	C10H10O3	3	19367-38-5	242862	209472	224056	1.11195e+06	1.04812e+06	1.40309e+06	1.275	0.0121458	0.0454991	0.189828	-2.39723	down
Zjrp083011	panaxytriol	人参三醇	Others	其它类	Alcohol compounds	醇类化合物	C17H26O3	3	-	48567.7	48567.7	48567.7	514363	706361	429715	1.27457	0.0256051	0.0722994	0.0882815	-3.50175	down
Xmcn005741	patrinioside	patrinioside	Terpenoids	萜类	Sesquiterpenoids	倍半萜	C21H36O10	3	-	2454.23	2454.23	2454.23	21095.1	40897	22962.7	1.26485	0.054723	0.117359	0.0866661	-3.52839	down
Hahn001878	picroroside A	苦味素A	Others	其它类	Others	其它	C24H30O12	3	-	21537.7	26427.6	23476.9	1232.05	1232.05	1232.05	1.28296	0.00393973	0.0250687	19.3289	4.27269	up
Wasn000410	sn-glycero-3-phospho-(1'-sn-glycerol)	sn-glycero-3-phospho-(1'-sn-glycerol)	Others	其它类	Others	其它	C6H15O8P	1	-	1.61121e+06	1.77545e+06	1.6845e+06	3.15122e+06	3.37447e+06	3.63771e+06	1.27065	0.00346512	0.0227259	0.498963	-1.00299	down
Wmsn000915	teufruintin B	teufruintin B	Terpenoids	萜类	Ditepenoids	二萜	C22H32O7	3	-	203148	175842	161143	32228.6	32228.6	32228.6	1.27995	0.00686015	0.032434	5.58648	2.48194	up
mws1515	α-Ionone	α-紫罗兰酮	Terpenoids	萜类	Monoterpenoids	倍萜	C13H20O	3	127-41-3	3376.74	3376.74	3376.74	16883.7	25783.5	23080.2	1.27192	0.0195992	0.0598846	0.154078	-2.69827	down
Lmyn007769	β-Anhydroicaritin	β-脱水淫羊藿素	Flavonoids	黄酮	Other Flavonoids	其它类黄酮	C21H20O6	2	38226-86-7	9.52713e+06	9.13577e+06	9.54402e+06	71778	61984.4	53608.9	1.28318	0.000199625	0.00652516	150.54	7.23401	up
Lhcp090204	β-Ionone	β-紫罗兰酮	Terpenoids	萜类	Monoterpenoids	倍萜	C13H20O	3	79-77-6	2256.41	2256.41	2256.41	17663.8	17901.9	16360.2	1.28346	0.00101185	0.0128345	0.130363	-2.93939	down
pme2566	γ-Glu-Ala	γ-谷氨酰-丙氨酸	Amino acids and derivatives	氨基酸及其衍生物	Amino acids and derivatives	氨基酸及其衍生物	C8H14N2O5	3	5875-41-2	64375.7	83240.4	72394.5	8657.44	43287.2	8657.44	1.06293	0.0278196	0.075197	3.63041	1.86013	up
Lmfp004911	γ-Tomatine	γ-番茄碱	Alkaloids	生物碱	Steroid alkaloids	甾体类生物碱	C39H65NO12	3	81037-16-3	3.70336e+06	5.54759e+06	4.60465e+06	600071	498030	735618	1.26775	0.0159448	0.0518094	7.55601	2.91762	up
