# Supplementary material for: Integrated transcriptomic, proteomic and metabolomic analyses revealing the roles of amino acid and sucrose metabolism in augmenting drought tolerance in Agropyron mongolicum
Source: Front Plant Sci. 2024 Dec 16;15:1515944. doi: 10.3389/fpls.2024.1515944 (PMC11685866; doi:10.3389/fpls.2024.1515944)
Supplement: Supplementary file 10 [file Table9.xlsx]

## Sheet: Sheet4
Accession	FC	P-value	Biological process	Cellular component	Molecular function
Isoform0017705	41.2874	0.001764	GO:0009086 methionine biosynthetic process;GO:0032259 methylation	--	GO:0003871 5-methyltetrahydropteroyltriglutamate-homocysteine S-methyltransferase activity;GO:0008270 zinc ion binding
Isoform0000994	40.798	########	--	GO:0016021 integral component of membrane	GO:0005524 ATP binding;GO:0140359 ABC-type transporter activity
Isoform0025473	6.2427	0.001315	GO:0006006 glucose metabolic process;GO:0006096 glycolytic process	GO:0005737 cytoplasm	GO:0004365 glyceraldehyde-3-phosphate dehydrogenase (NAD+) (phosphorylating) activity;GO:0050661 NADP binding;GO:0051287 NAD binding
Isoform0023189	2.24621	0.049288	GO:0010411 xyloglucan metabolic process;GO:0042546 cell wall biogenesis;GO:0071555 cell wall organization	GO:0048046 apoplast	GO:0004553 hydrolase activity, hydrolyzing O-glycosyl compounds;GO:0016762 xyloglucan:xyloglucosyl transferase activity
Isoform0025241	2.01886	0.003854	--	GO:0016021 integral component of membrane	GO:0022857 transmembrane transporter activity
Isoform0019487	2.01052	########	--	--	GO:0080043 quercetin 3-O-glucosyltransferase activity;GO:0080044 quercetin 7-O-glucosyltransferase activity
Isoform0014779	11.0142	########	GO:0006529 asparagine biosynthetic process;GO:0006541 glutamine metabolic process	--	GO:0004066 asparagine synthase (glutamine-hydrolyzing) activity;GO:0005524 ATP binding
Isoform0008113	10.8718	########	GO:0016310 phosphorylation;GO:0055129 L-proline biosynthetic process	GO:0005737 cytoplasm	GO:0004349 glutamate 5-kinase activity;GO:0004350 glutamate-5-semialdehyde dehydrogenase activity;GO:0005524 ATP binding
Isoform0025241	9.00215	0.000422	--	GO:0016021 integral component of membrane	GO:0022857 transmembrane transporter activity
Isoform0017999	8.42713	0.000491	GO:0006012 galactose metabolic process	--	GO:0003978 UDP-glucose 4-epimerase activity
Isoform0002543	8.05972	########	GO:0033512 L-lysine catabolic process to acetyl-CoA via saccharopine	--	GO:0047130 saccharopine dehydrogenase (NADP+, L-lysine-forming) activity;GO:0047131 saccharopine dehydrogenase (NAD+, L-glutamate-forming) activity
Isoform0003137	6.99898	0.000569	GO:0019343 cysteine biosynthetic process via cystathionine;GO:0019346 transsulfuration	GO:0005737 cytoplasm	GO:0004123 cystathionine gamma-lyase activity;GO:0016846 carbon-sulfur lyase activity;GO:0030170 pyridoxal phosphate binding
Isoform0018687	6.34584	0.000631	GO:0019343 cysteine biosynthetic process via cystathionine;GO:0019346 transsulfuration	GO:0005737 cytoplasm	GO:0004123 cystathionine gamma-lyase activity;GO:0016846 carbon-sulfur lyase activity;GO:0030170 pyridoxal phosphate binding
Isoform0018892	4.0996	########	GO:0009269 response to desiccation;GO:0009651 response to salt stress;GO:0009737 response to abscisic acid	--	GO:0004029 aldehyde dehydrogenase (NAD+) activity;GO:0043878 glyceraldehyde-3-phosphate dehydrogenase (NAD+) (non-phosphorylating) activity
Isoform0020718	3.23965	########	GO:0006545 glycine biosynthetic process;GO:0006567 threonine catabolic process	GO:0005829 cytosol	GO:0008732 L-allo-threonine aldolase activity
Isoform0022603	2.35802	########	--	GO:0016021 integral component of membrane	GO:0015293 symporter activity
